# Supplementary material for: Complete chloroplast and ribosomal sequences for 30 accessions elucidate evolution of Oryza AA genome species
Source: PubMed Central journal article supplement (PMC4623524; doi:10.1038/srep15655), 2015-10-28
Supplement: srep15655-s1.pdf [file srep15655-s1.pdf]

## Supplementary Information

### Complete chloroplast and ribosomal sequences for 30 accessions elucidate evolution of *Oryza* AA genome species

Kyunghee Kim<sup>1,2,†</sup>, Sang-Choon Lee<sup>1,†</sup>, Junki Lee<sup>1,†</sup>, Yeisoo Yu<sup>2,3,†</sup>, Kiwoung Yang<sup>1,4</sup>, Beom-Soon Choi<sup>2</sup>, Hee-Jong Koh<sup>1</sup>, Nomar Espinosa Waminal<sup>1</sup>, Hong-Il Choi<sup>1</sup>, Nam-Hoon Kim<sup>1</sup>, Woojong Jang<sup>1</sup>, Hyun-Seung Park<sup>1</sup>, Jonghoon Lee<sup>1</sup>, Hyun Oh Lee<sup>1,2</sup>, Ho Jun Joh<sup>1</sup>, Hyeon Ju Lee<sup>1</sup>, Jee Young Park<sup>1</sup>, Sampath Perumal<sup>1</sup>, Murukarthick Jayakodi<sup>1</sup>, Yun Sun Lee<sup>1</sup>, Backki Kim<sup>1</sup>, Dario Copetti<sup>3</sup>, Soonok Kim<sup>5</sup>, Sunggil Kim<sup>6</sup>, Ki-Byung Lim<sup>7</sup>, Young-Dong Kim<sup>8</sup>, Jungho Lee<sup>9</sup>, Kwang-Su Cho<sup>10</sup>, Beom-Seok Park<sup>11</sup>, Rod A. Wing<sup>3</sup>, and Tae-Jin Yang<sup>1,\*</sup>

<sup>1</sup>Department of Plant Science, Plant Genomics and Breeding Institute, and Research Institute for Agriculture and Life Sciences, College of Agriculture and Life Sciences, Seoul National University, Seoul, 151-921, Republic of Korea; <sup>2</sup>Phyzen Genome Institute, 501-1, Gwanak Century Tower, Kwanak-gu, Seoul, 151-836, Republic of Korea; <sup>3</sup>Arizona Genomics Institute, School of Plant Sciences, The University of Arizona, Tucson, Arizona, 85721, USA; <sup>4</sup>Department of Horticulture, Sunchon National University, Suncheon, 540-950, Republic of Korea; <sup>5</sup>Biological and Genetic Resources Assessment Division, National Institute of Biological Resources, Incheon, 404-170, Republic of Korea; <sup>6</sup>Department of Plant Biotechnology, Biotechnology Research Institute, Chonnam National University, Gwangju, 500-757, Republic of Korea; <sup>7</sup>Department of Horticultural Science, Kyungpook National University, Daegu, 702-701, Republic of Korea; <sup>8</sup>Department of Life Science, Hallym University, Chuncheon, Kangwon-do, 200-702, Republic of Korea; <sup>9</sup>Green Plant Institute, #2-202 Biovalley, 89 Seoho-ro, Kwonseon-gu, Suwon, Republic of Korea; <sup>10</sup>Highland Agriculture Research Institute, National Institute of Crop Science, Rural Development Administration, Pyeongchang-gun, Kangwon-do, 232-955, Republic of Korea; <sup>11</sup>Department of Agricultural Biotechnology, National Academy of Agricultural Science, Rural Development Administration, Jeonju, 560-500, Republic of Korea

<sup>†</sup>These authors contributed equally to this work.

\*Corresponding author

Correspondence and requests for materials should be addressed to T.J.Y. (email: tjyang@snu.ac.kr)

## Supplementary Figures

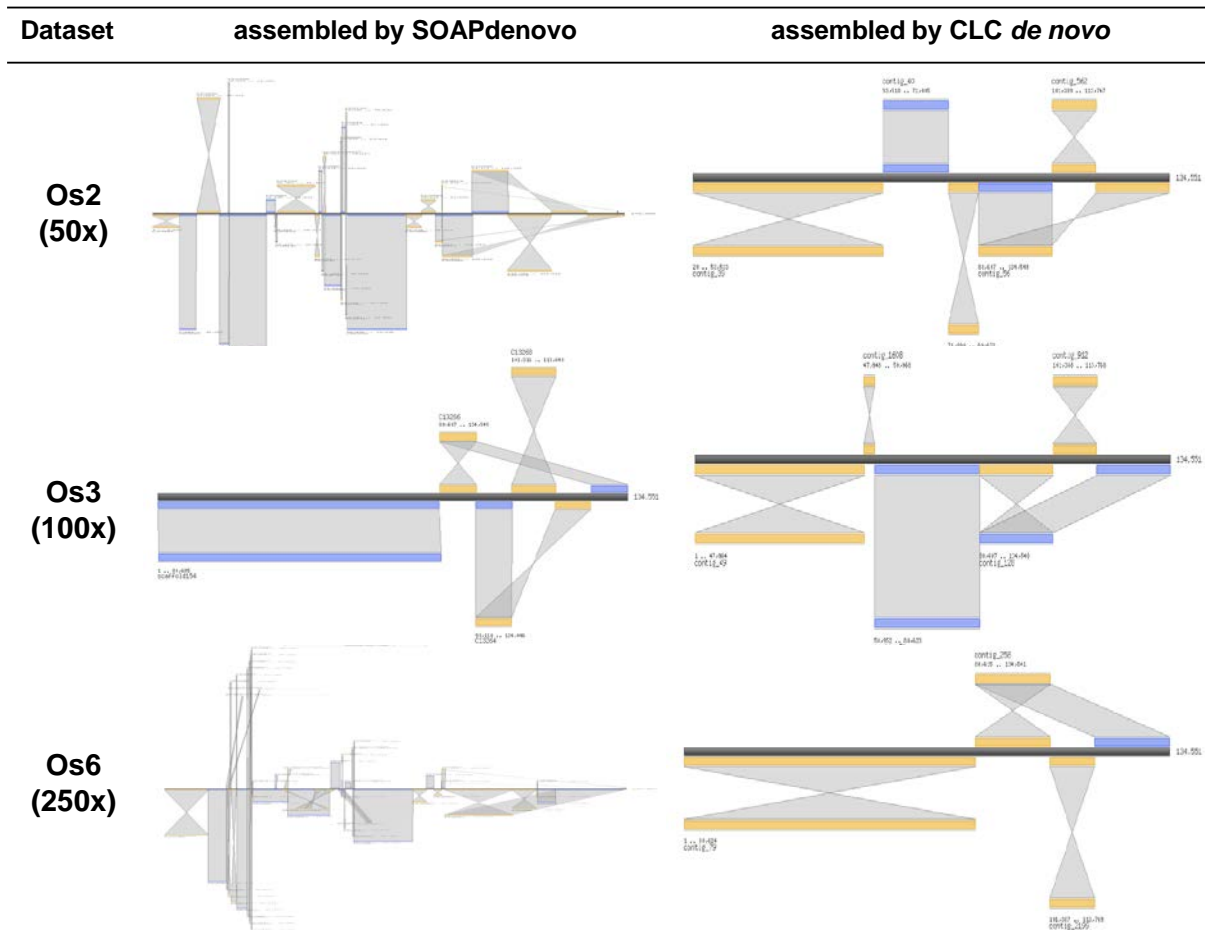

**Supplementary Fig. S1. Comparison of rice cp contigs assembled by SOAPdenovo and the CLC *de novo* assembler.** Assembled cp contigs from datasets Os2, Os3 and Os6, (Supplementary Table S3) were aligned to the corresponding rice cp genome sequence. Blue and orange bars indicate contigs matching to the reference sequence in forward and reverse orientations, respectively.





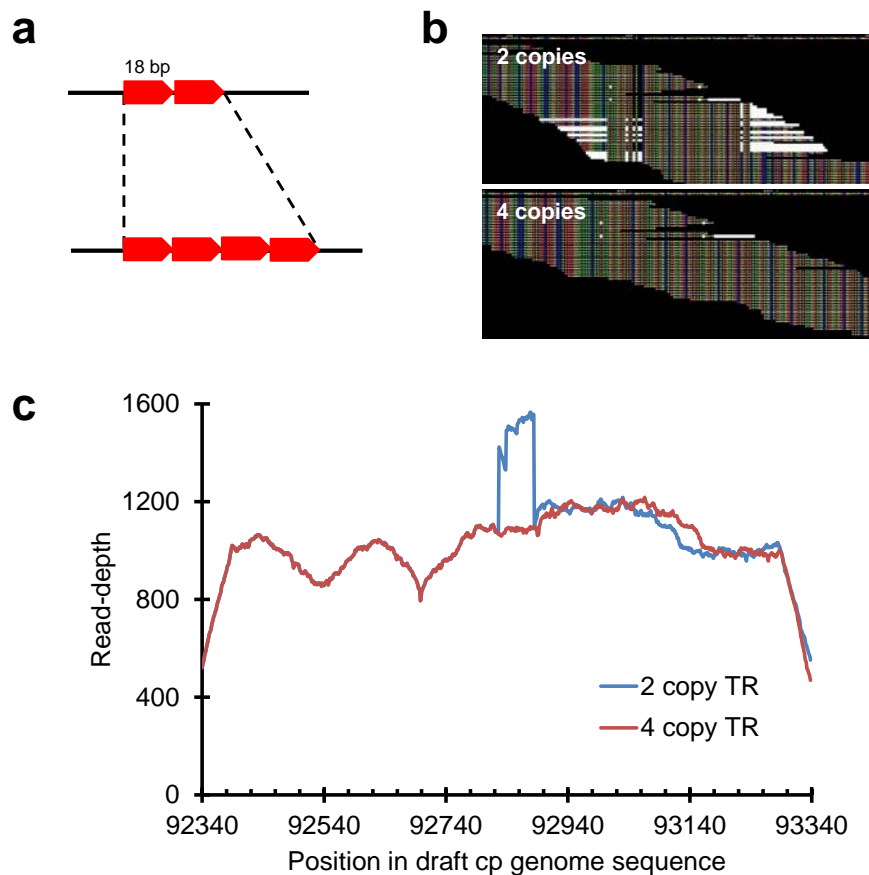

**Supplementary Fig. S4. Assembly error derived from copy number reduction of tandem repeats (TRs).** **a**, Schematic diagram showing incorrect TR copy number reduction from four to two 18-bp unit TRs. **b**, Raw read mapping on cp contigs with two (top) or four (bottom) TRs. Many instances of incorrect read mapping (white reads) are detected on the two-copy TR contig. **c**, Distribution of raw read mapping depth on cp contigs with two (blue) or four (red)-copy TRs. Abnormally high read depth is exhibited in the TR region of the two-copy TR contig because of accumulation of mis-mapping.



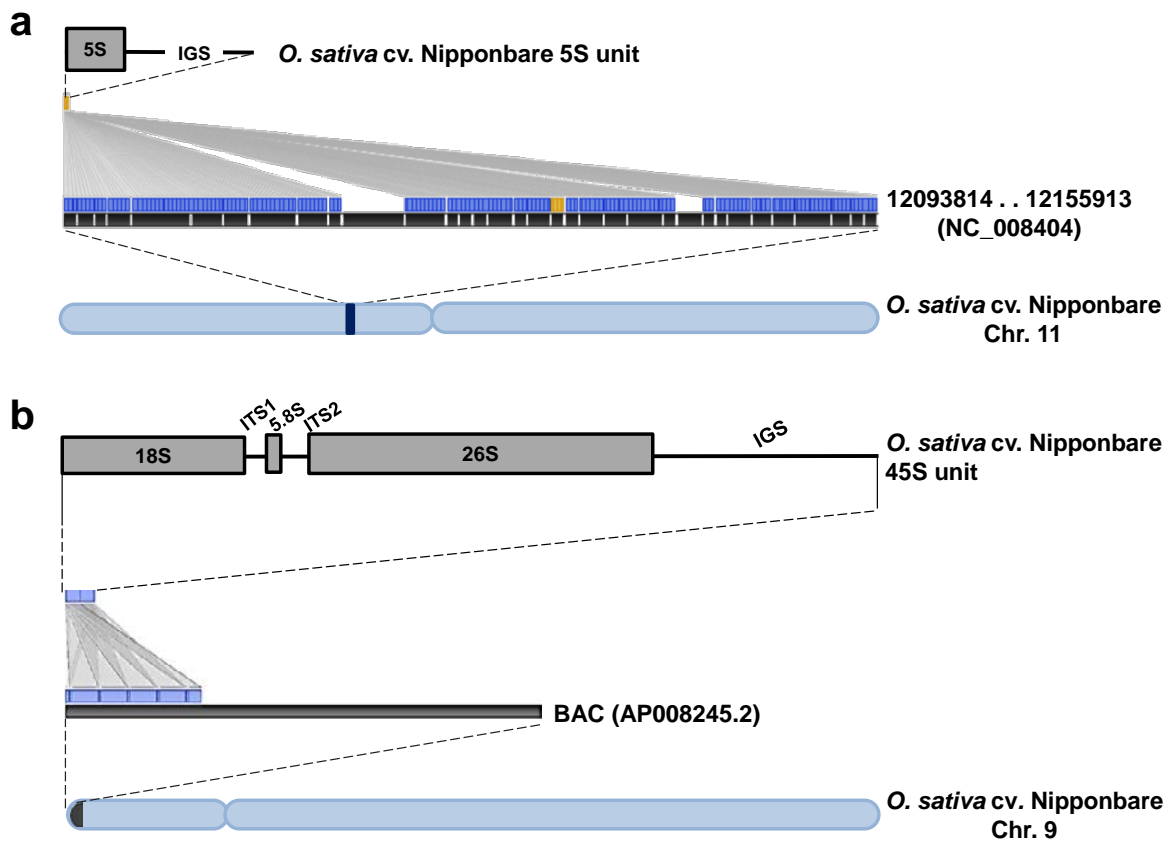

**Supplementary Fig. S6. Structure of 5S and 45S contigs and comparison with their homologous sequences in rice pseudo-chromosome sequence. a,** Structure of the complete 5S unit assembled in this study and tandem array of the 5S units on a region of rice chromosome 11. **b,** Structure of the complete 45S unit assembled in this study and tandem array of the 45S units on rice BAC sequence located on rice chromosome 9.

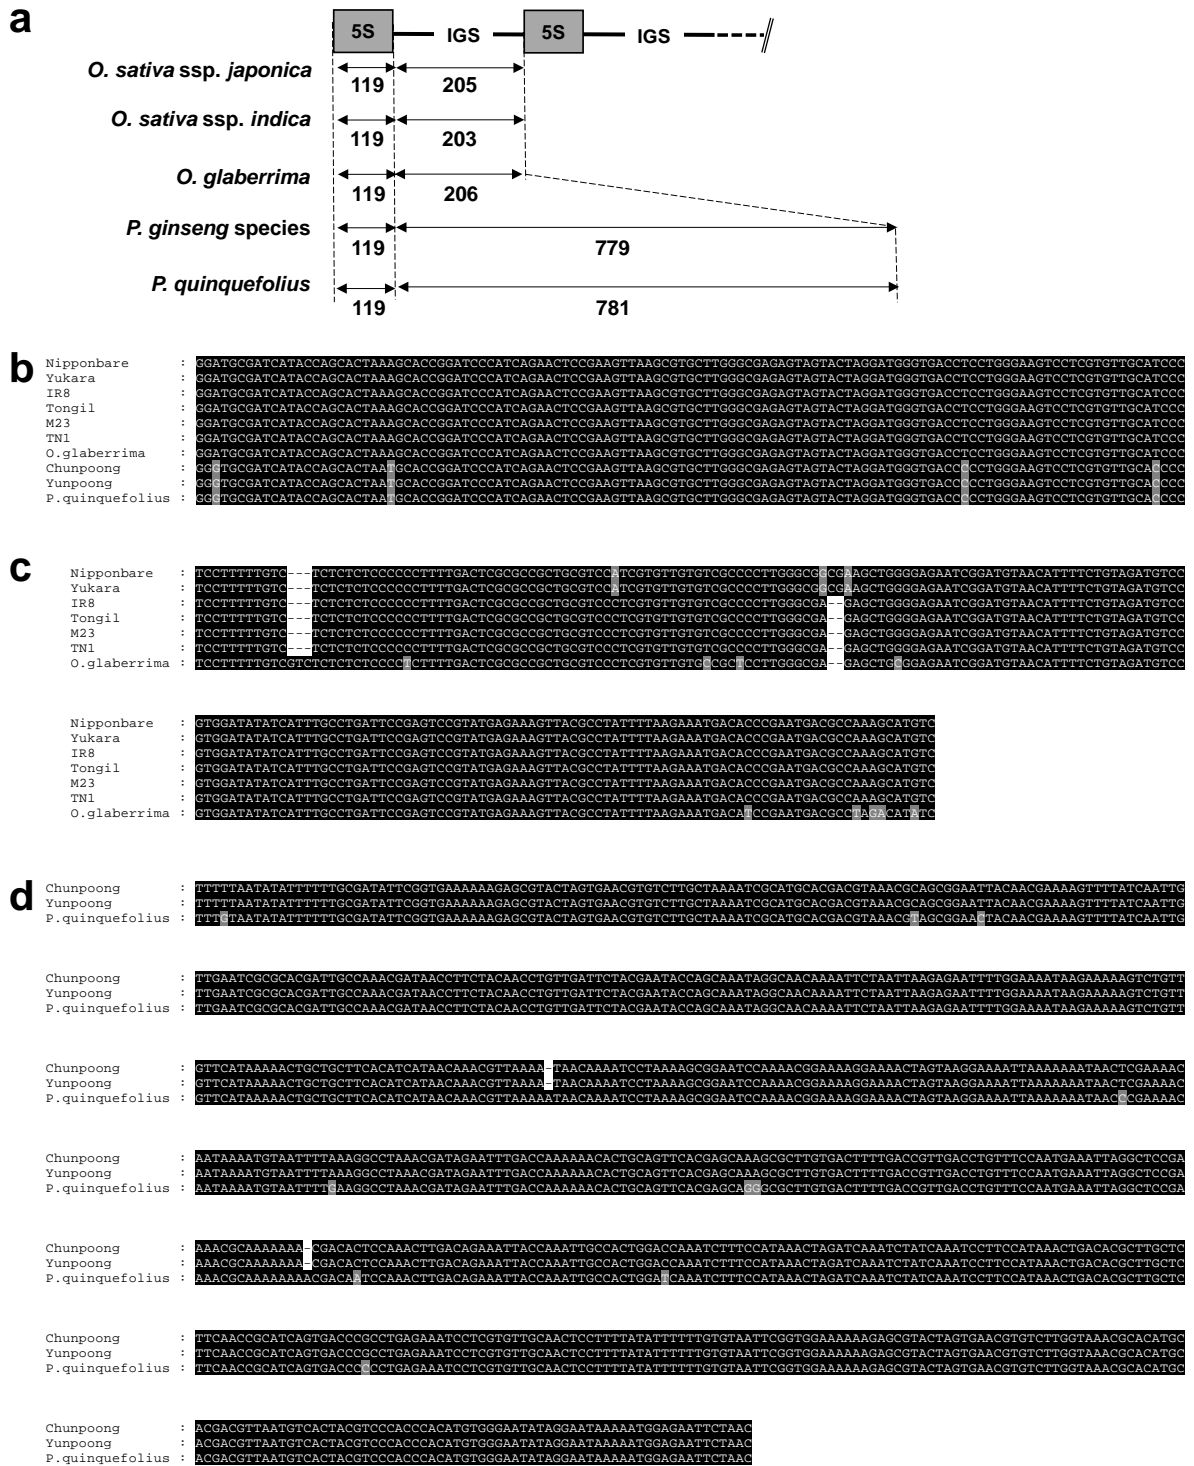

**Supplementary Fig. S7. Comparison of complete 5S unit sequences in *Oryza* and *Panax* species. a**, Length comparison of 5S units. **b**, Sequence comparison of 5S rRNA coding sequence. **c**, Sequence comparison of IGS of *Oryza* species. **d**, Sequence comparison of IGS of *Panax* species (GenBank nos. KM036312, KM036313, and KM036314). Nucleotide



sequences were aligned and visualized using ClustalW (<http://www.genome.jp/tools/clustalw/>) and GeneDoc software (<http://www.nrbsc.org/gfx/genedoc/>).

**a**

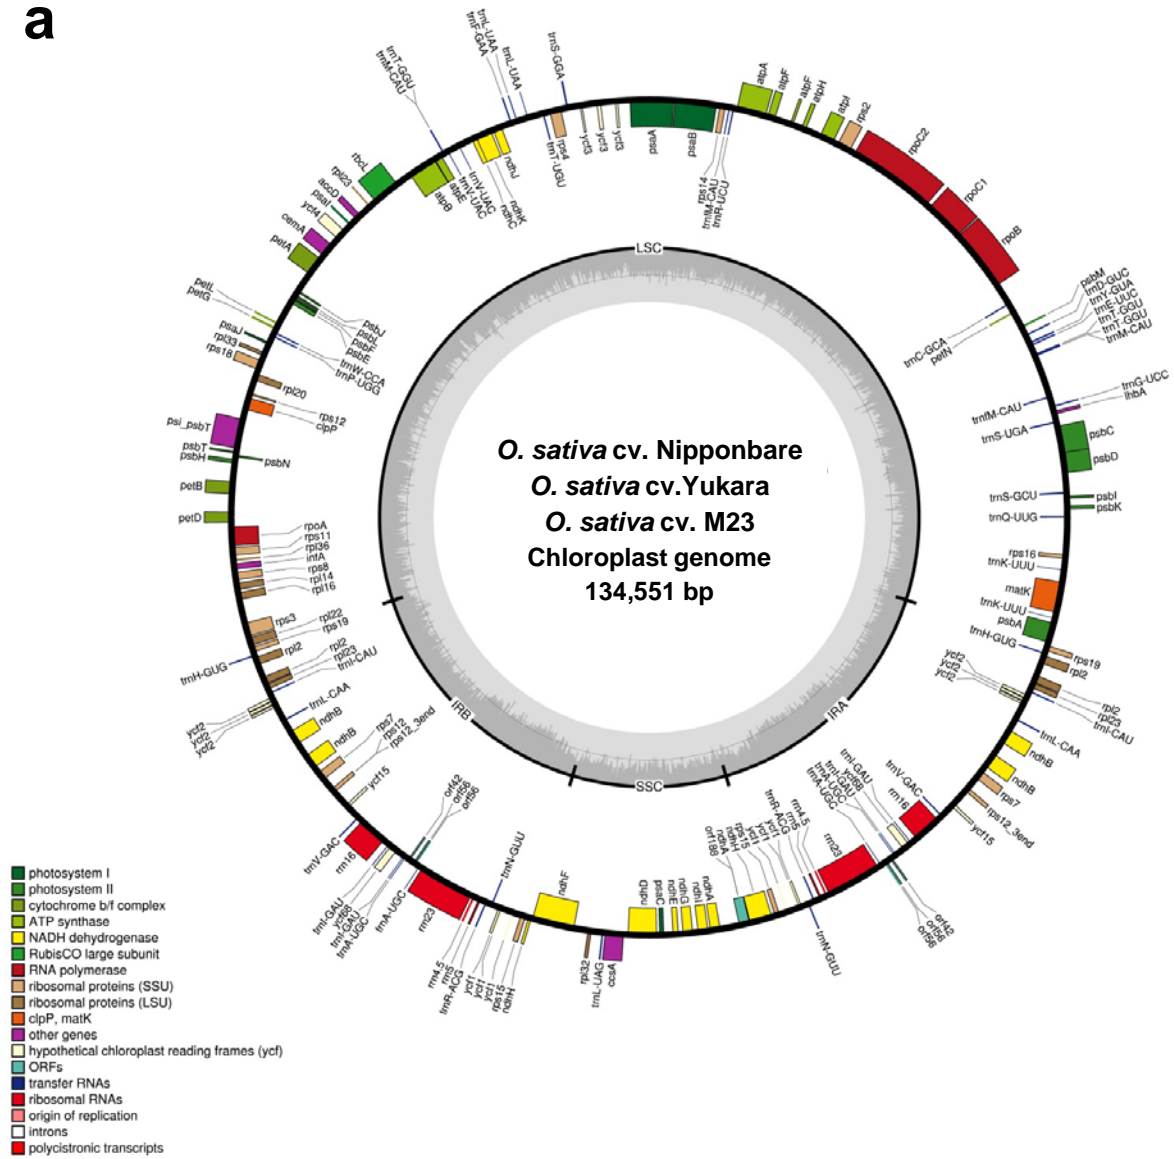

**b**

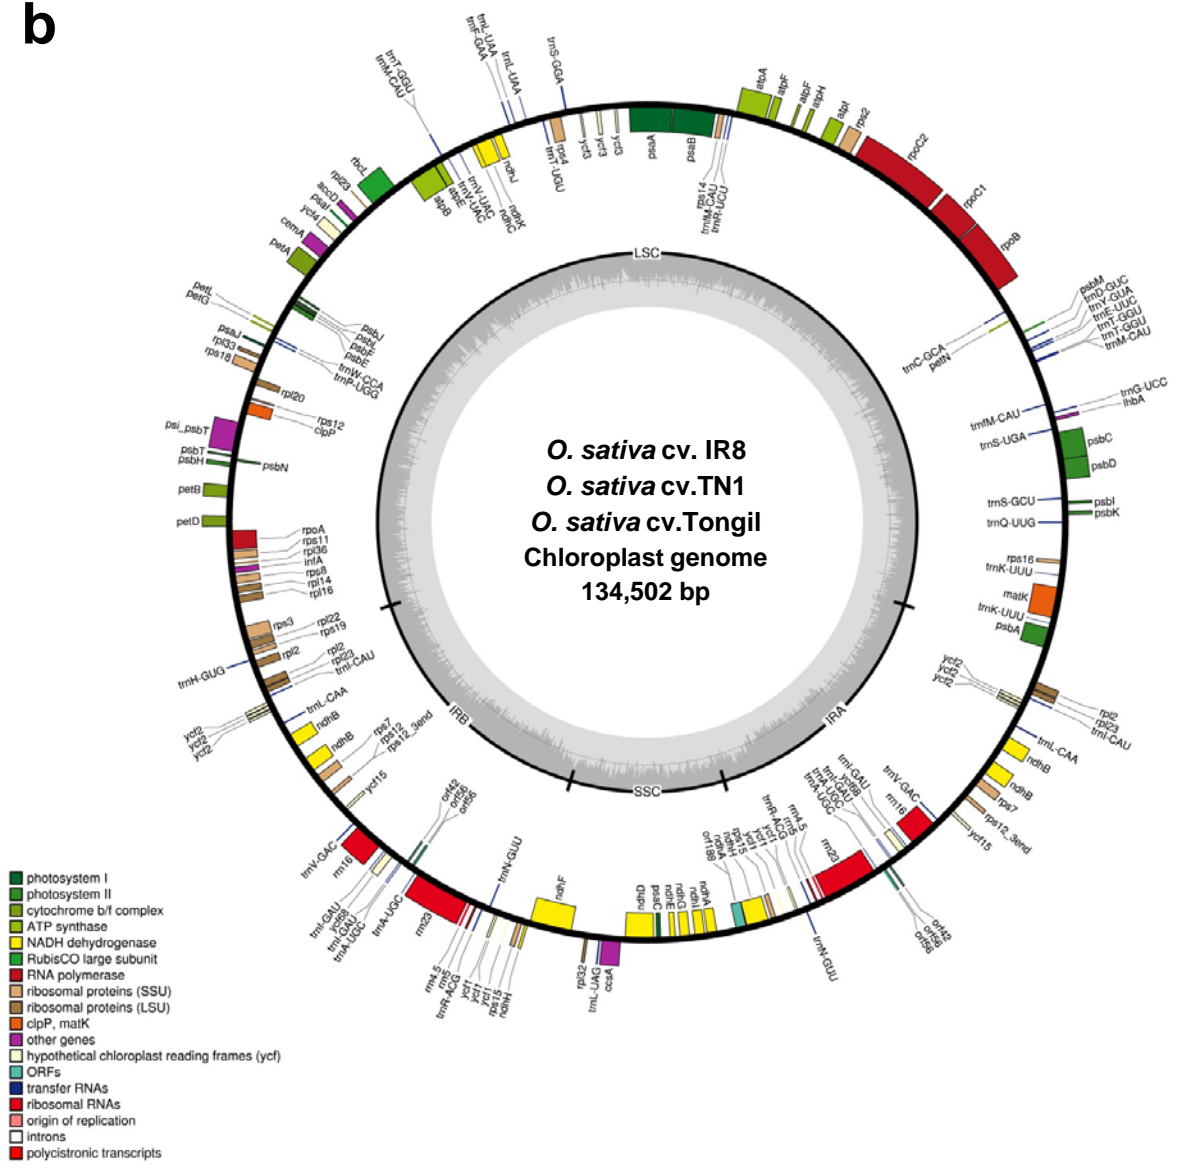

C

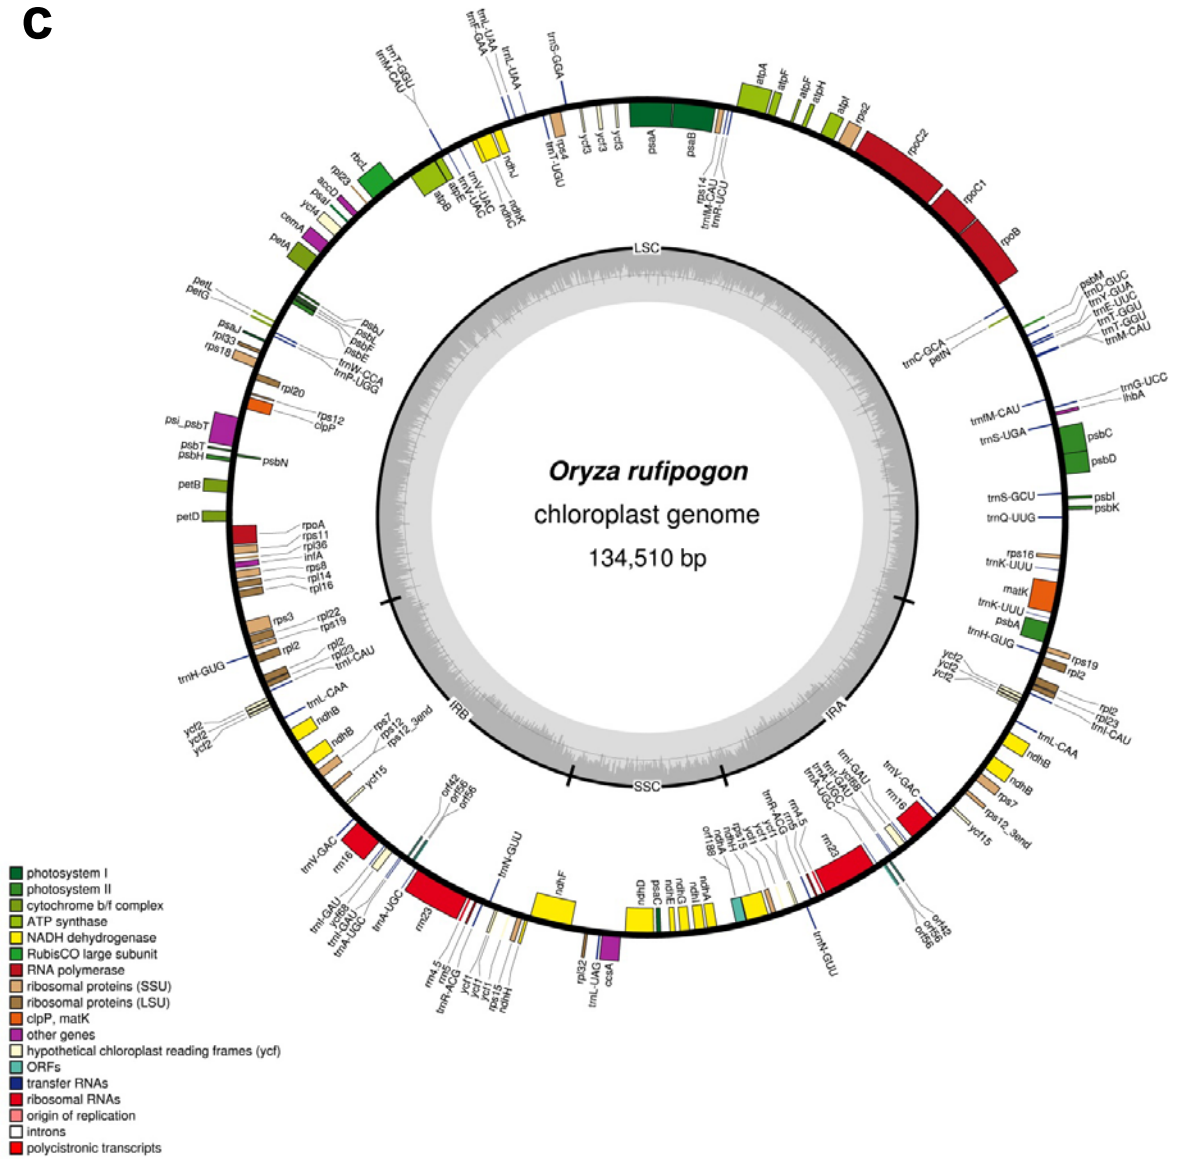

d

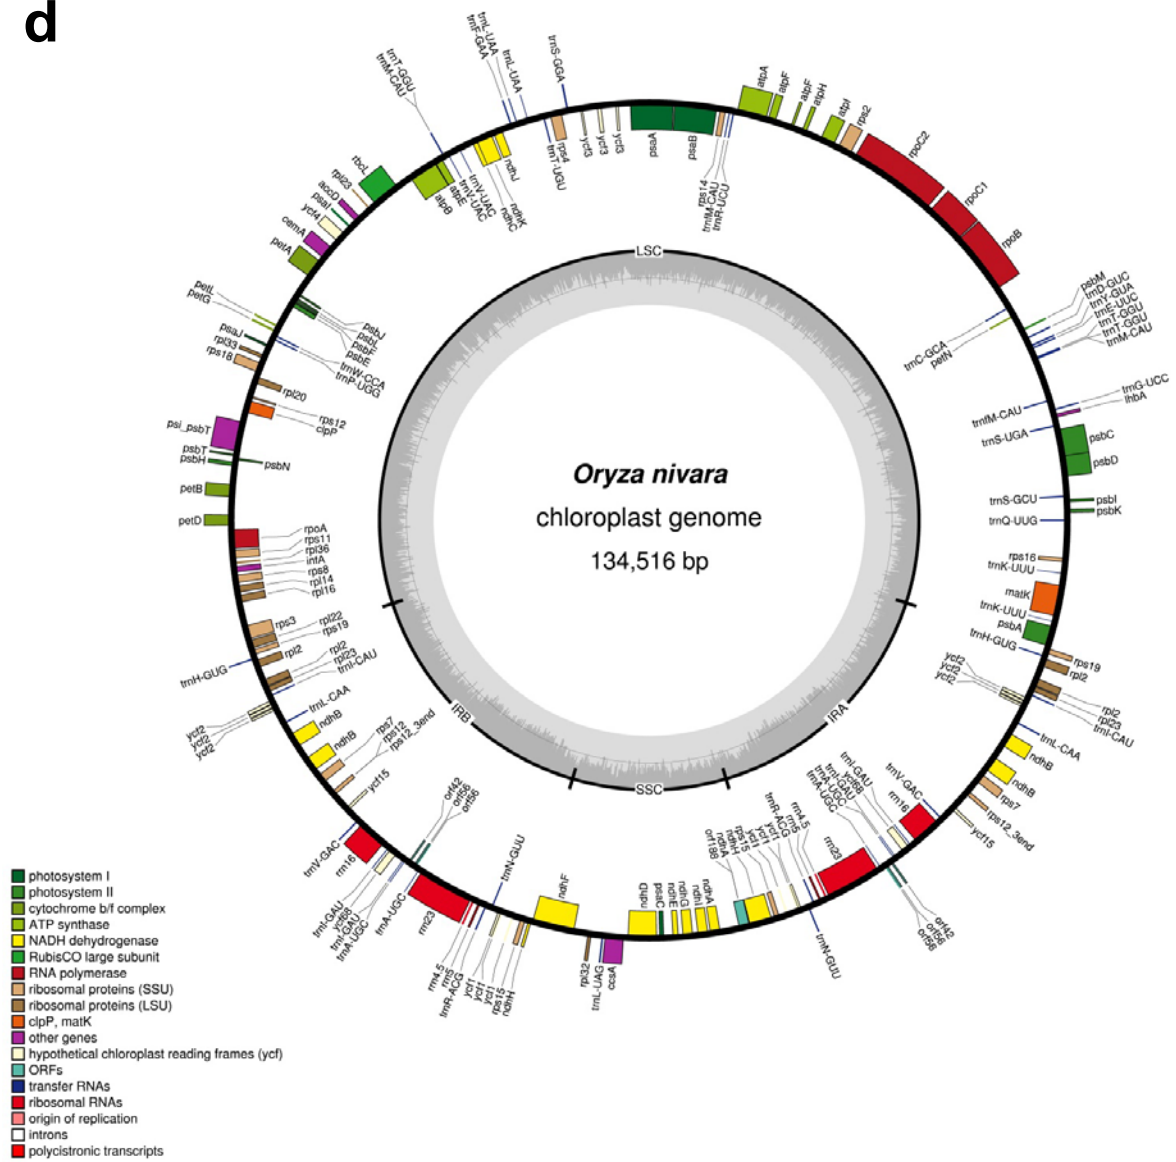

e

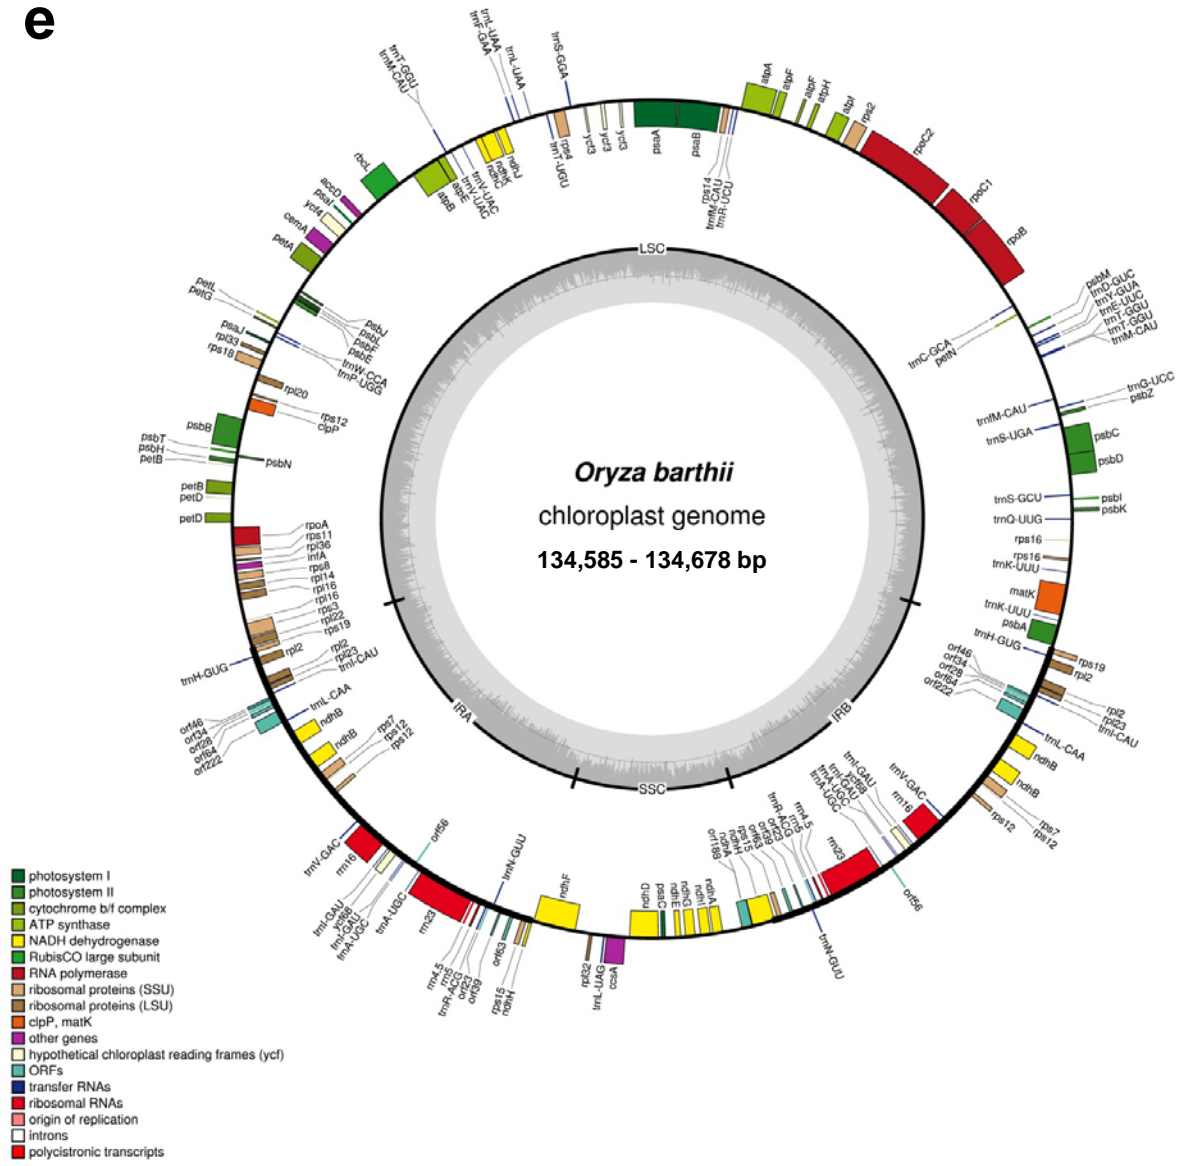

f

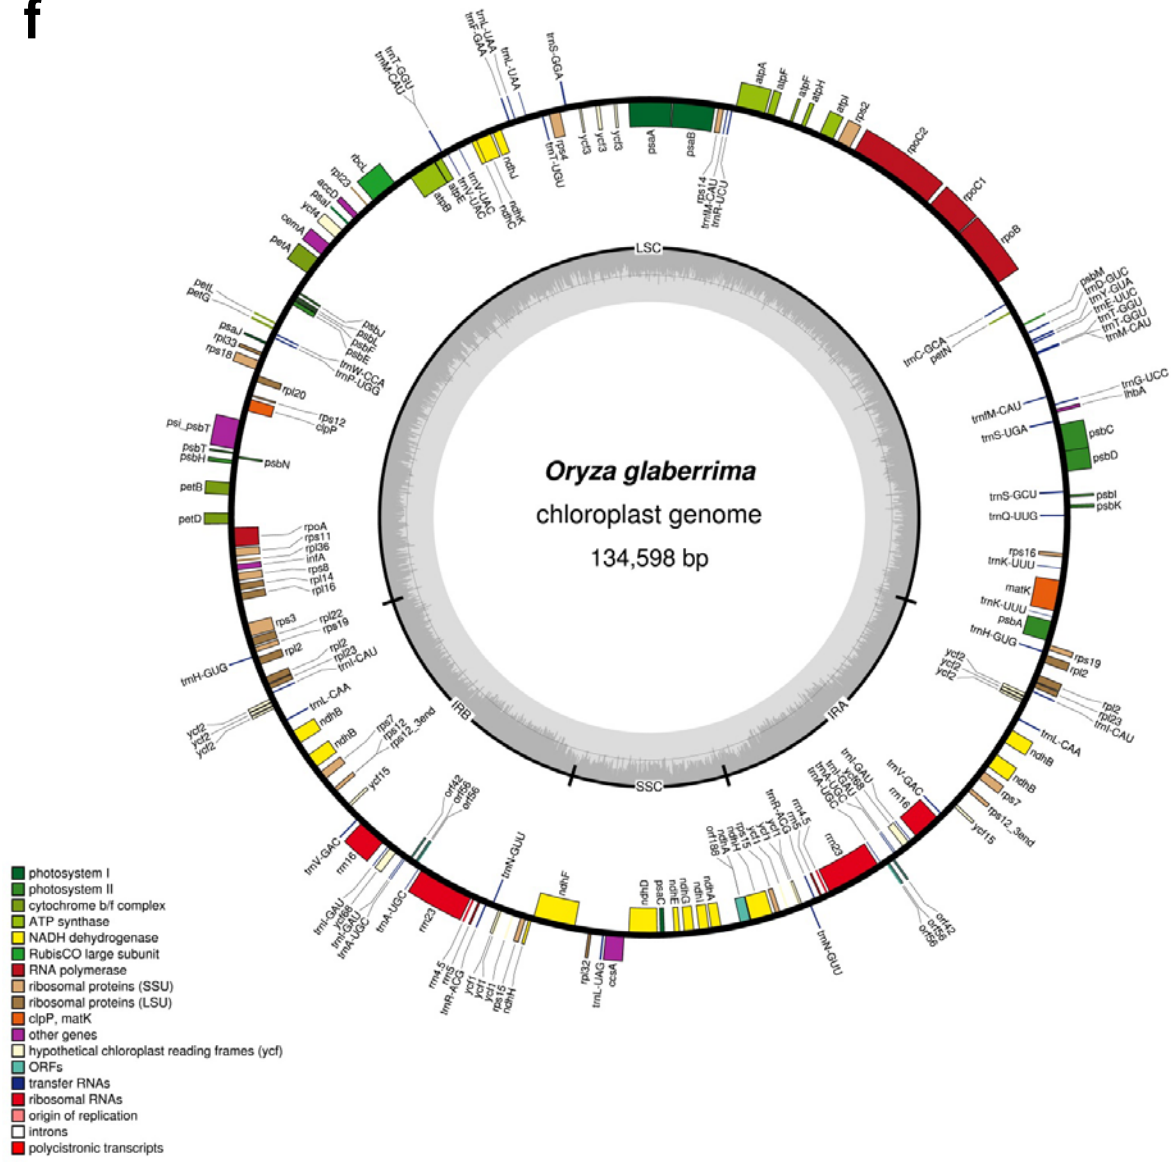



9

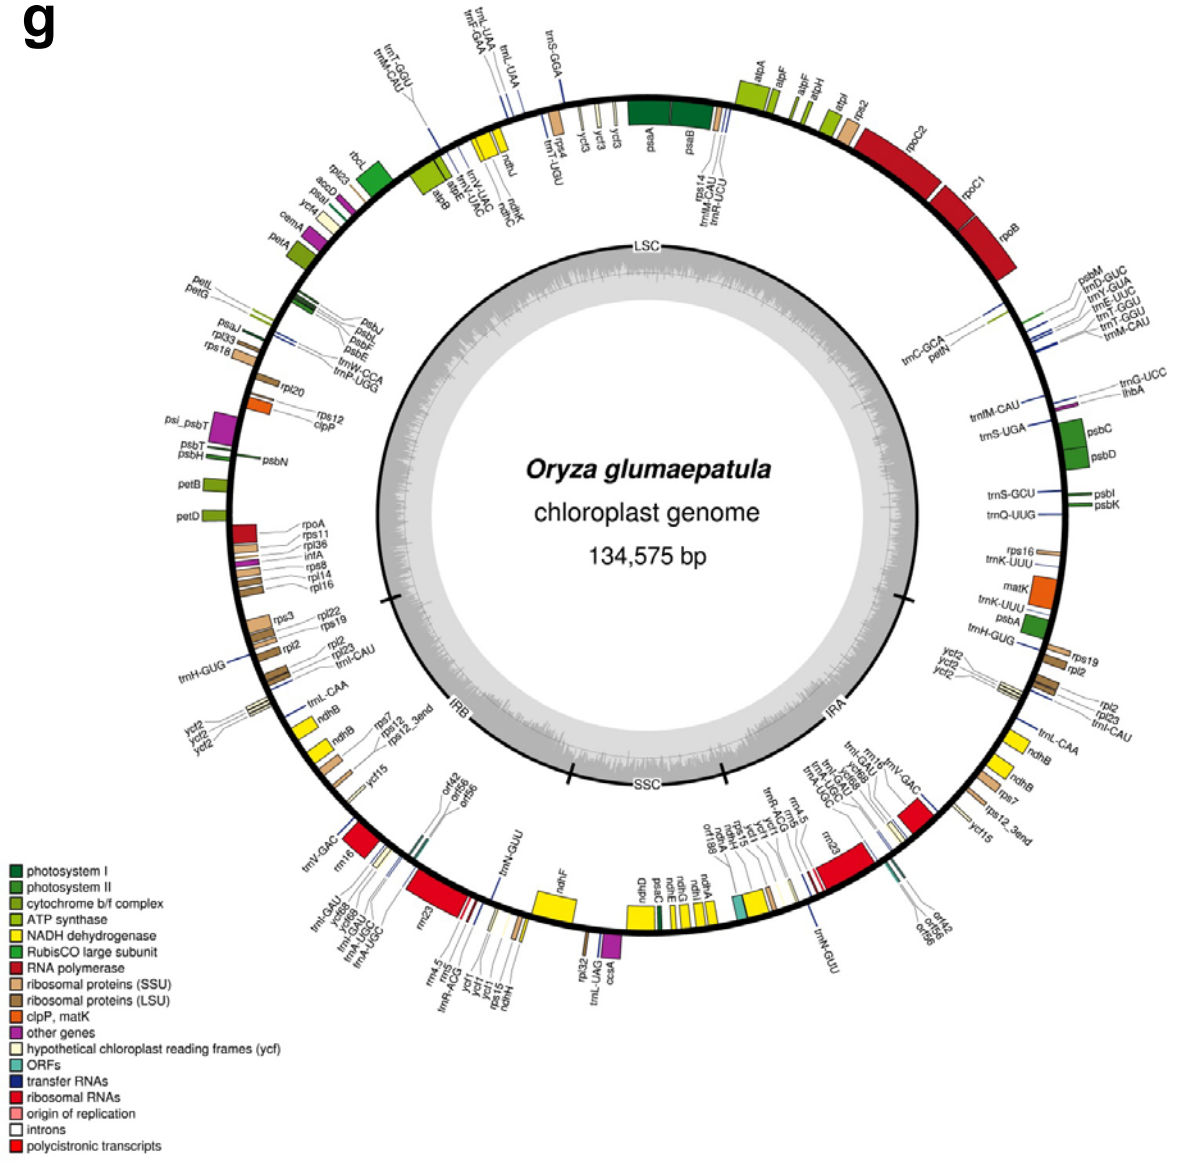



**h**

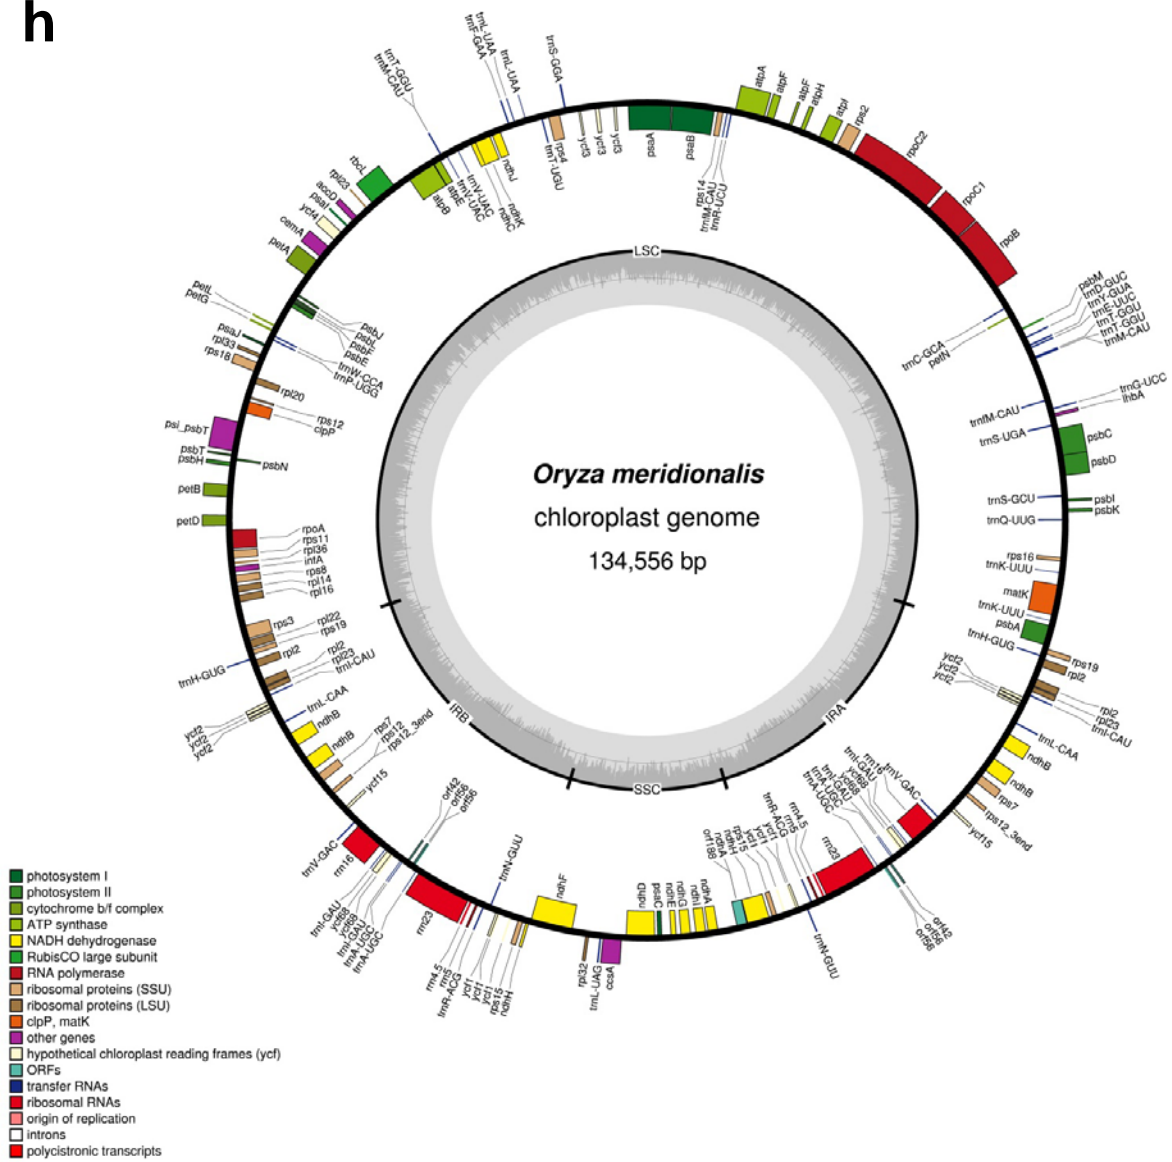

I

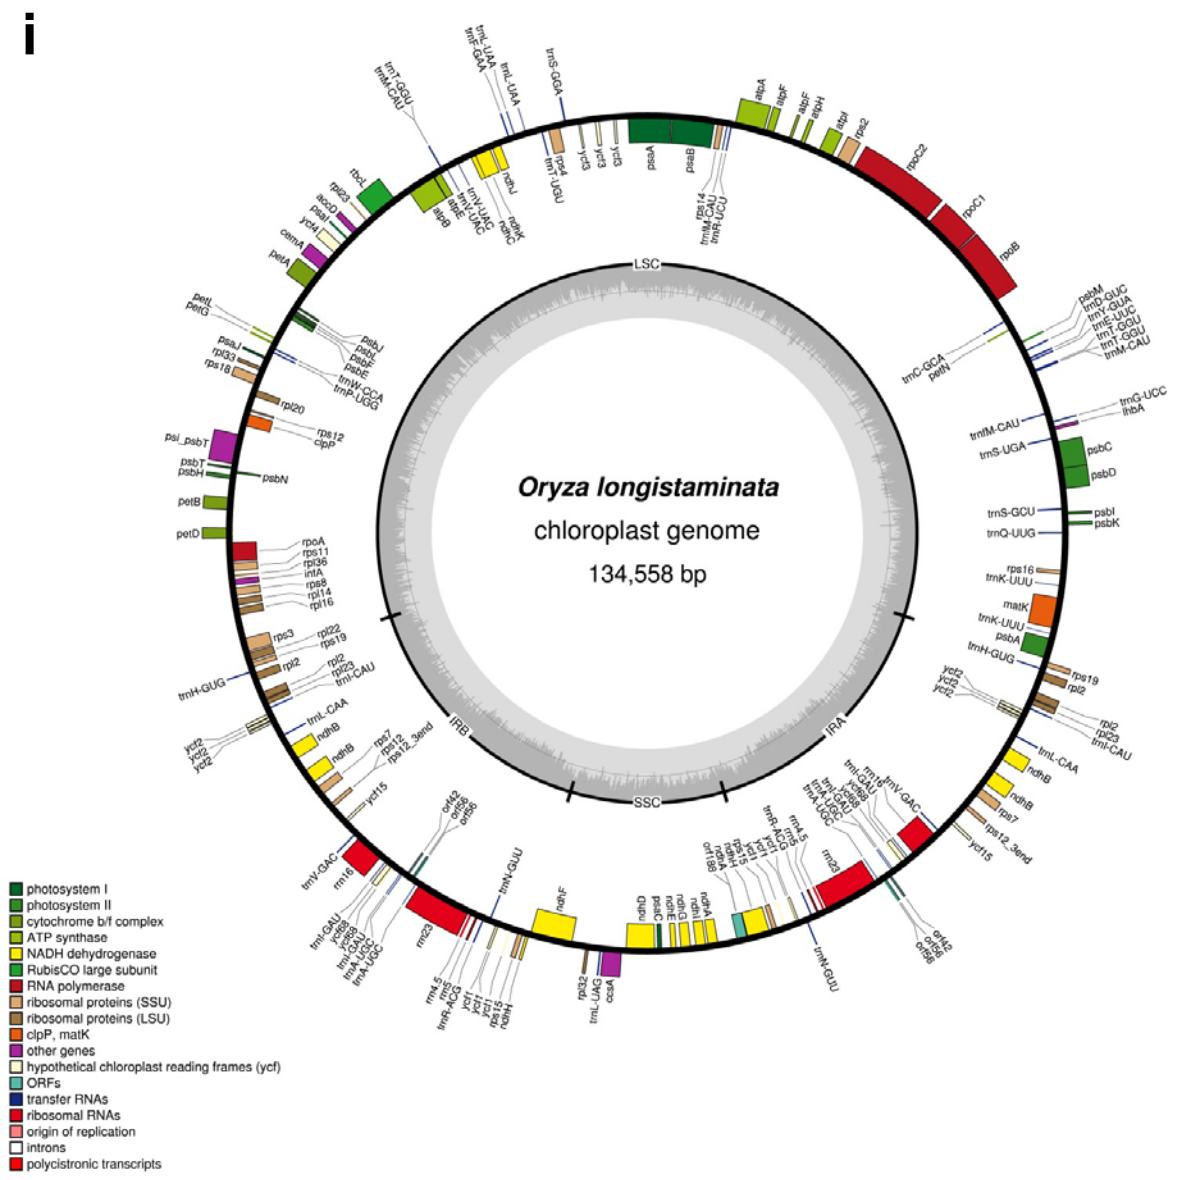

j

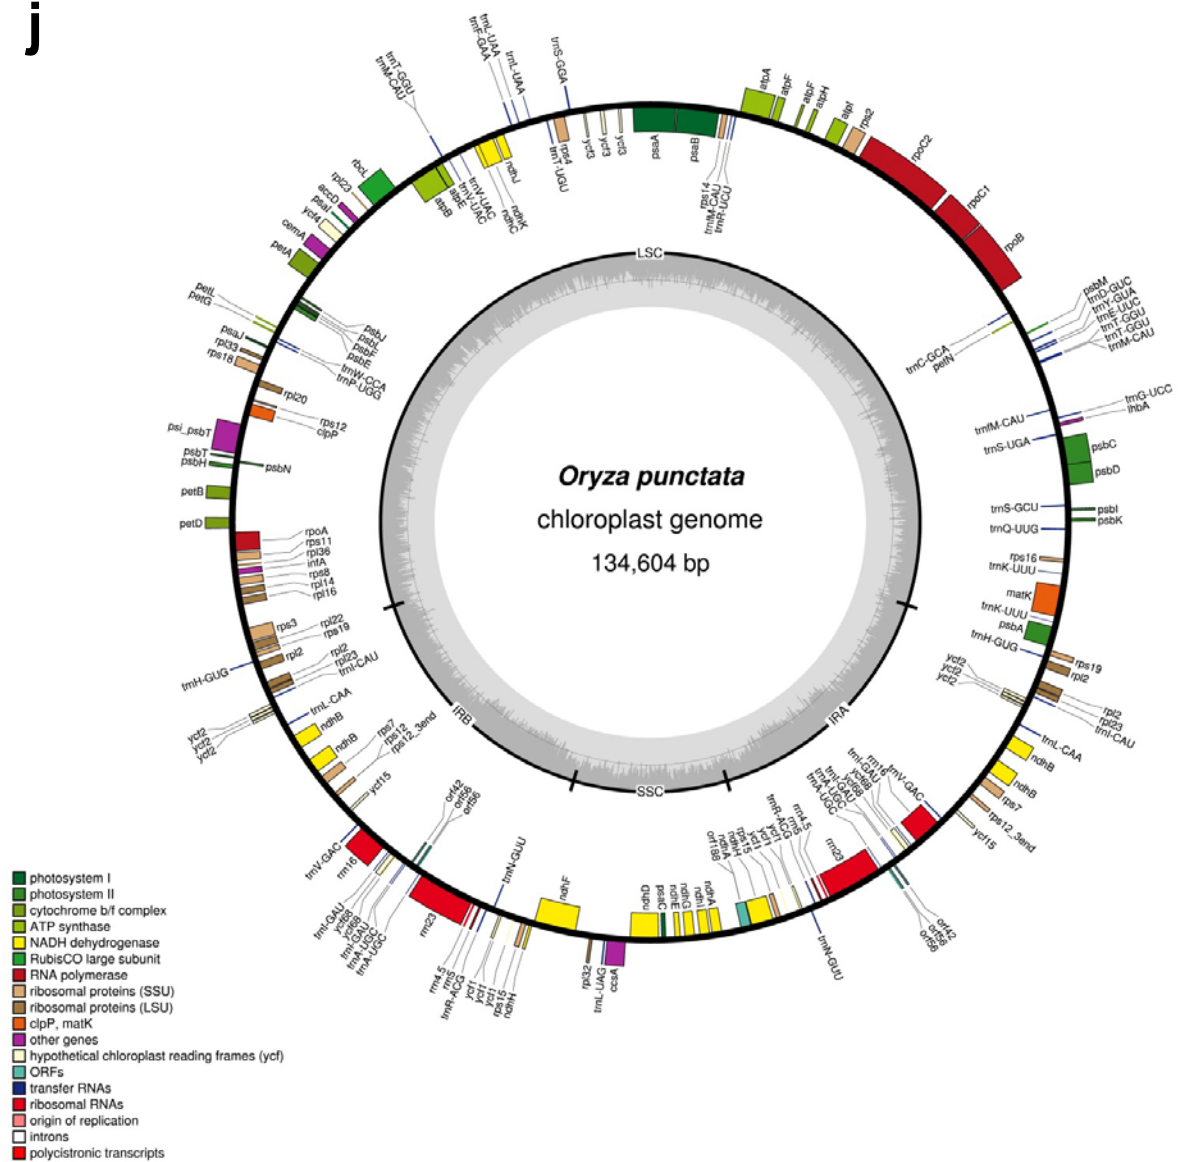

**Supplementary Fig. S8. Chloroplast genome map of nine *Oryza* species.** The complete cp genome sequence was generated by the dnaLCW method and annotated using the DOGMA program (<http://dogma.cccb.utexas.edu/>). The map was prepared using OGDRAW (<http://ogdraw.mpimp-golm.mpg.de/>). Genes transcribed clockwise and counterclockwise are indicated on the outside and inside of the large circle, respectively. The four parts of the cp genome and GC content are indicated on the inner circle. **a**, *O. sativa* cv. Nipponbare, cv. Yukara, and cv. M23; **b**, *O. sativa* cv. IR28, cv. TN1, and cv. Tongil; **c**, *O. rufipogon* accessions; **d**, *O. nivara* accessions; **e**, *O. barthii* accessions; **f**, *O. glaberrima* accessions; **g**, *O.*

*glumaepatula* accessions; **h**, *O. meridionalis* accessions; **i**, *O. longistaminata* (IRGC110404);  
**j**, *O. punctata* (IRGC105690).

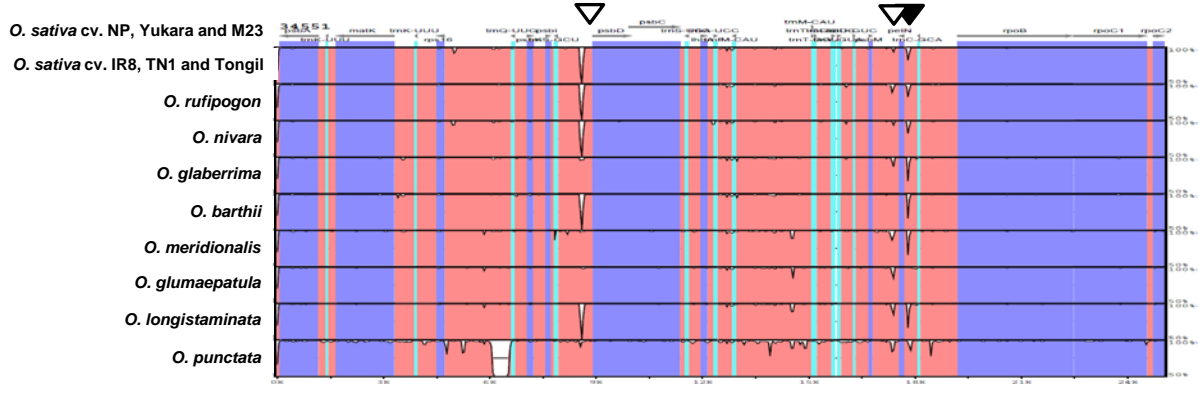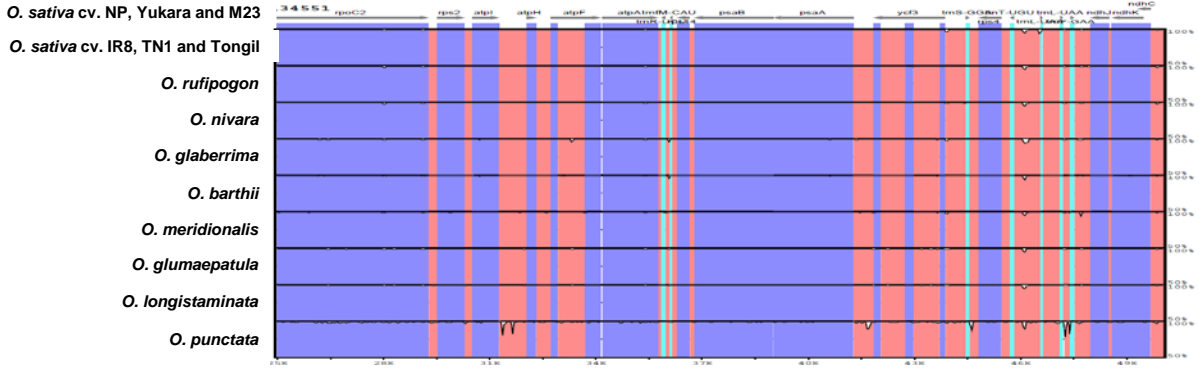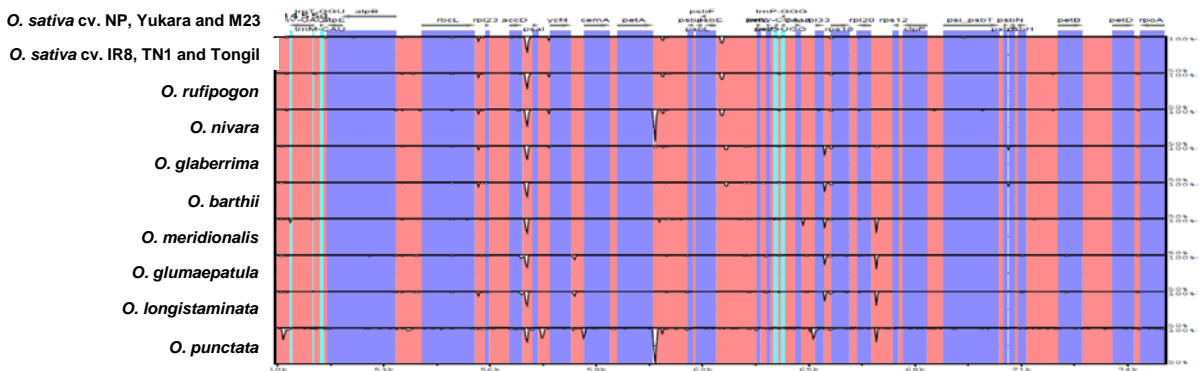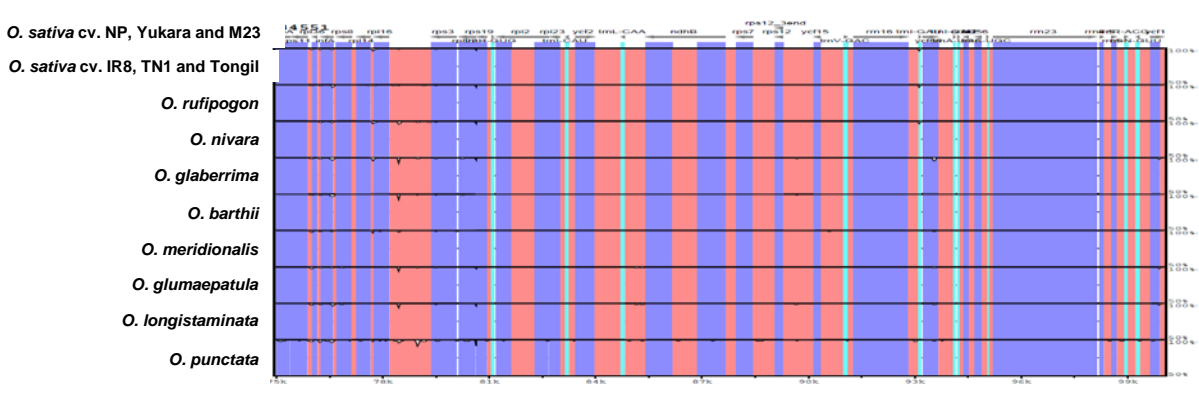

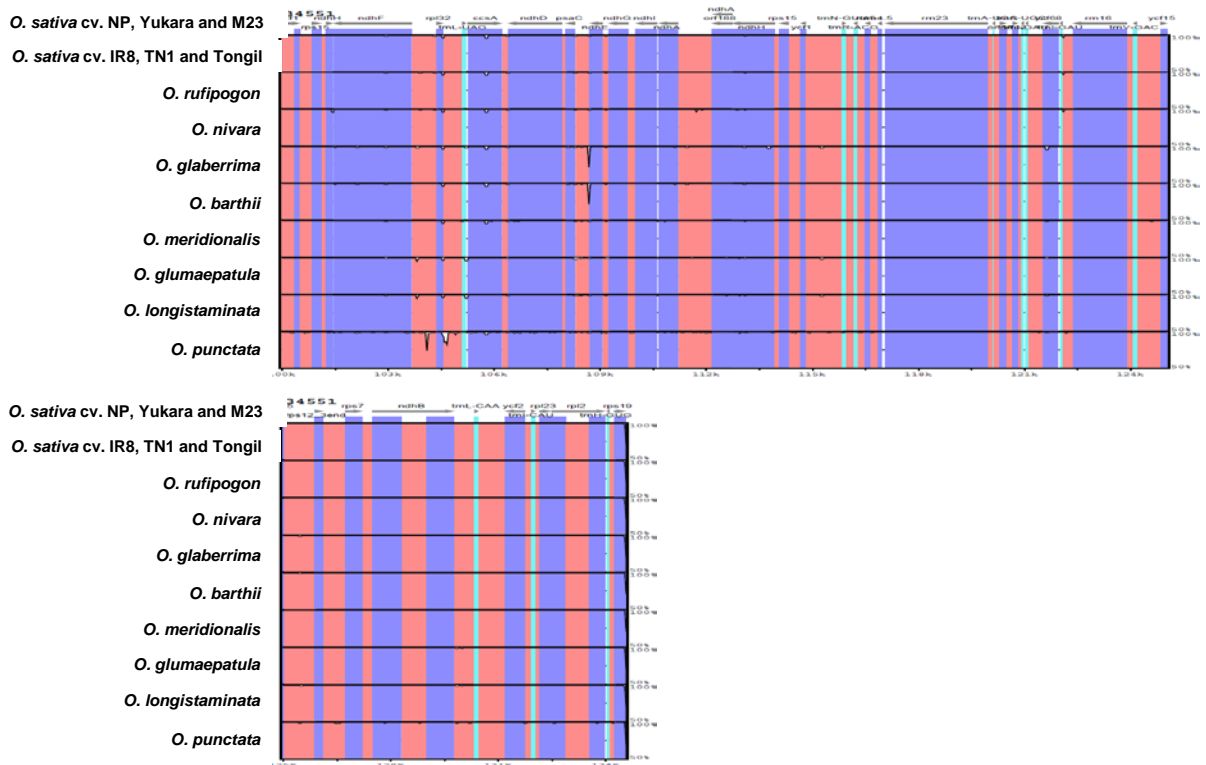

**Supplementary Fig. S9. Comparison of cp genome sequences of *Oryza* species.** Complete cp genomes of *Oryza* species were generated by the dnaLCW method. Genic regions were identified using the DOGMA program (<http://dogma.cccb.utexas.edu/>) and the comparative map was prepared using mVISTA (<http://genome.lbl.gov/vista/mvista/submit.shtml>). Empty and filled arrowheads indicate deletion and insertion of nucleotides, respectively, which were analyzed in Supplementary Fig. S10.

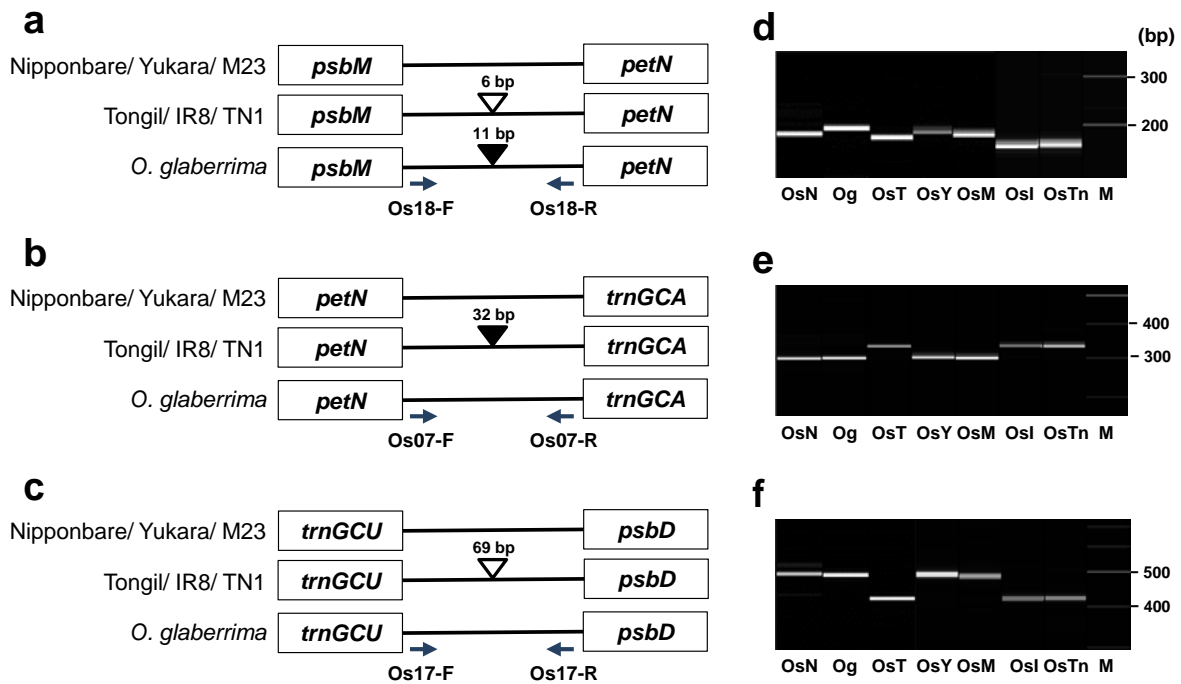

**Supplementary Fig. S10. Schematic representation and validation of polymorphism for three InDel regions between *Oryza* subspecies.** Complete cp genomes of seven *Oryza* species were generated and compared to identify polymorphic regions. Three InDel regions found in *psbM-petN* (**a** and **d**), *petN-trnGCA* (**b** and **e**), and *trnGCU-psbD* (**c** and **f**) were confirmed by PCR analysis. Empty and filled arrowheads indicate deletion and insertion of nucleotides, respectively, when compared with the cp genome sequence of cv. Nipponbare. Arrows indicate primer positions (Supplementary Table S6). OsN, *O. sativa* cv. Nipponbare; Og, *O. glaberrima*; OsT, cv. Tongil; OsY, cv. Yukara; OsM, cv. M23; OsI, cv. IR8; OsTn, cv. TN1; M, DNA size marker.

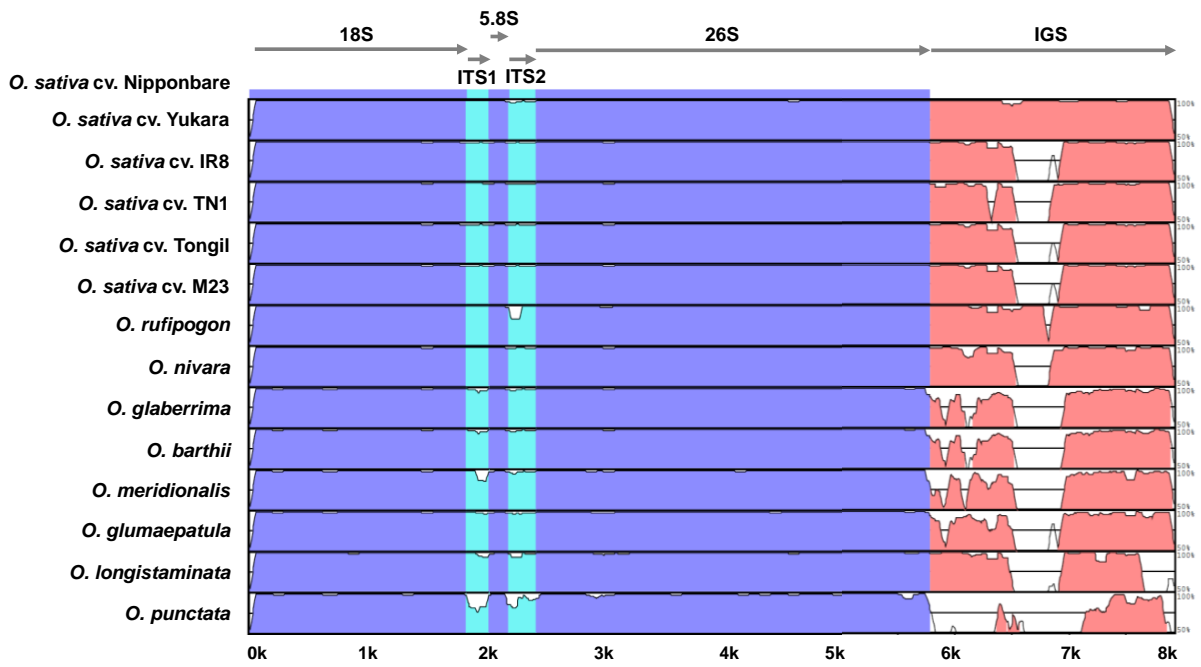

**Supplementary Fig. S11. Comparison of 45S units of *Oryza* species.** Complete 45S units of *Oryza* species were generated by method developed in this study and the comparative map was constructed using mVISTA (<http://genome.lbl.gov/vista/mvista/submit.shtml>).



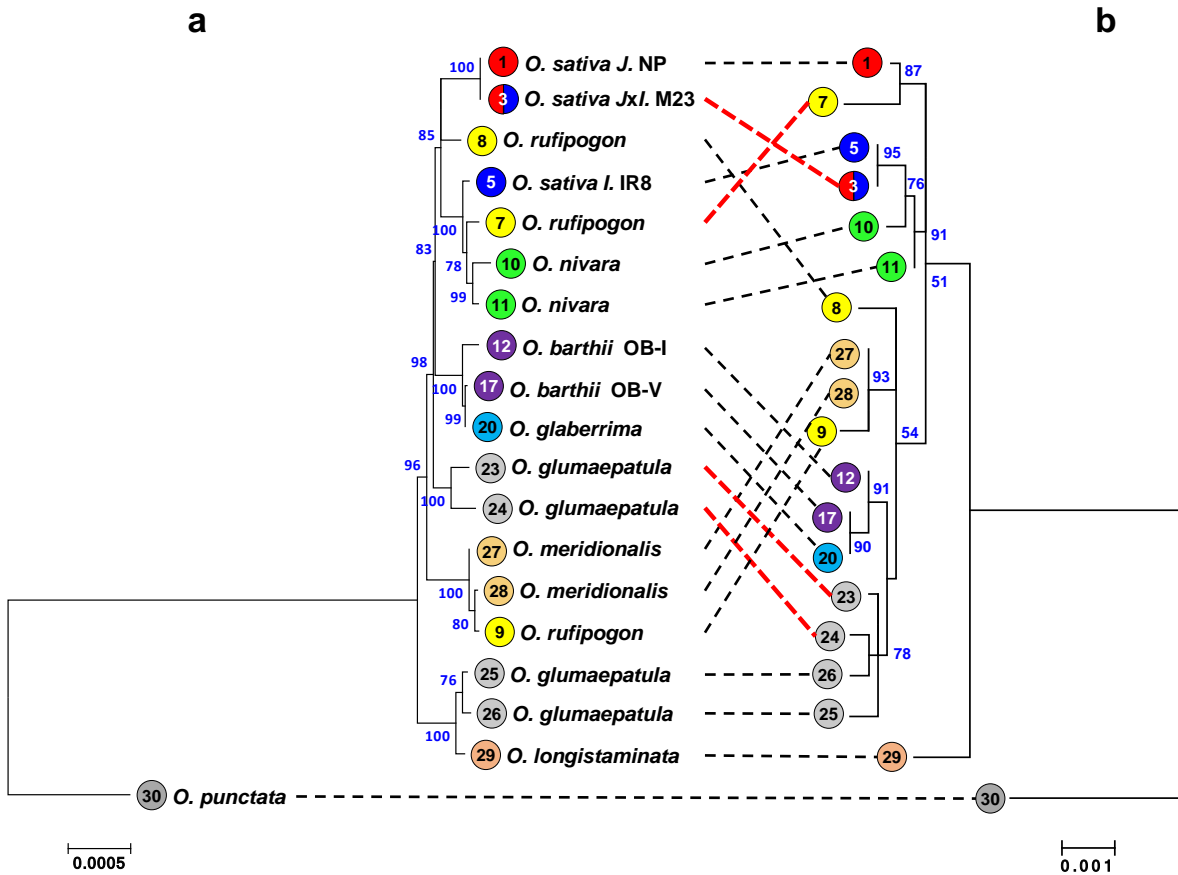

**Supplementary Fig. S12. Phylogenomic tree of *Oryza* species using the maximum likelihood (ML) method. (a,b)** Phylogenetic trees were built based on the complete cp genome (a) and 45S cistron sequences (b). *O. sativa* ssp. *japonica* and *indica* groups are denoted as *J* and *I*, respectively. Different species/subspecies are indicated with different colored labels. Numbers in colored circles represent accessions labeled in Table 1. Dashed lines connect the positions of each accession/cultivar in the two trees; red highlights major differences between trees. The tree was generated by the maximum likelihood (ML) method with 1,000 bootstrap replicates using MEGA6.

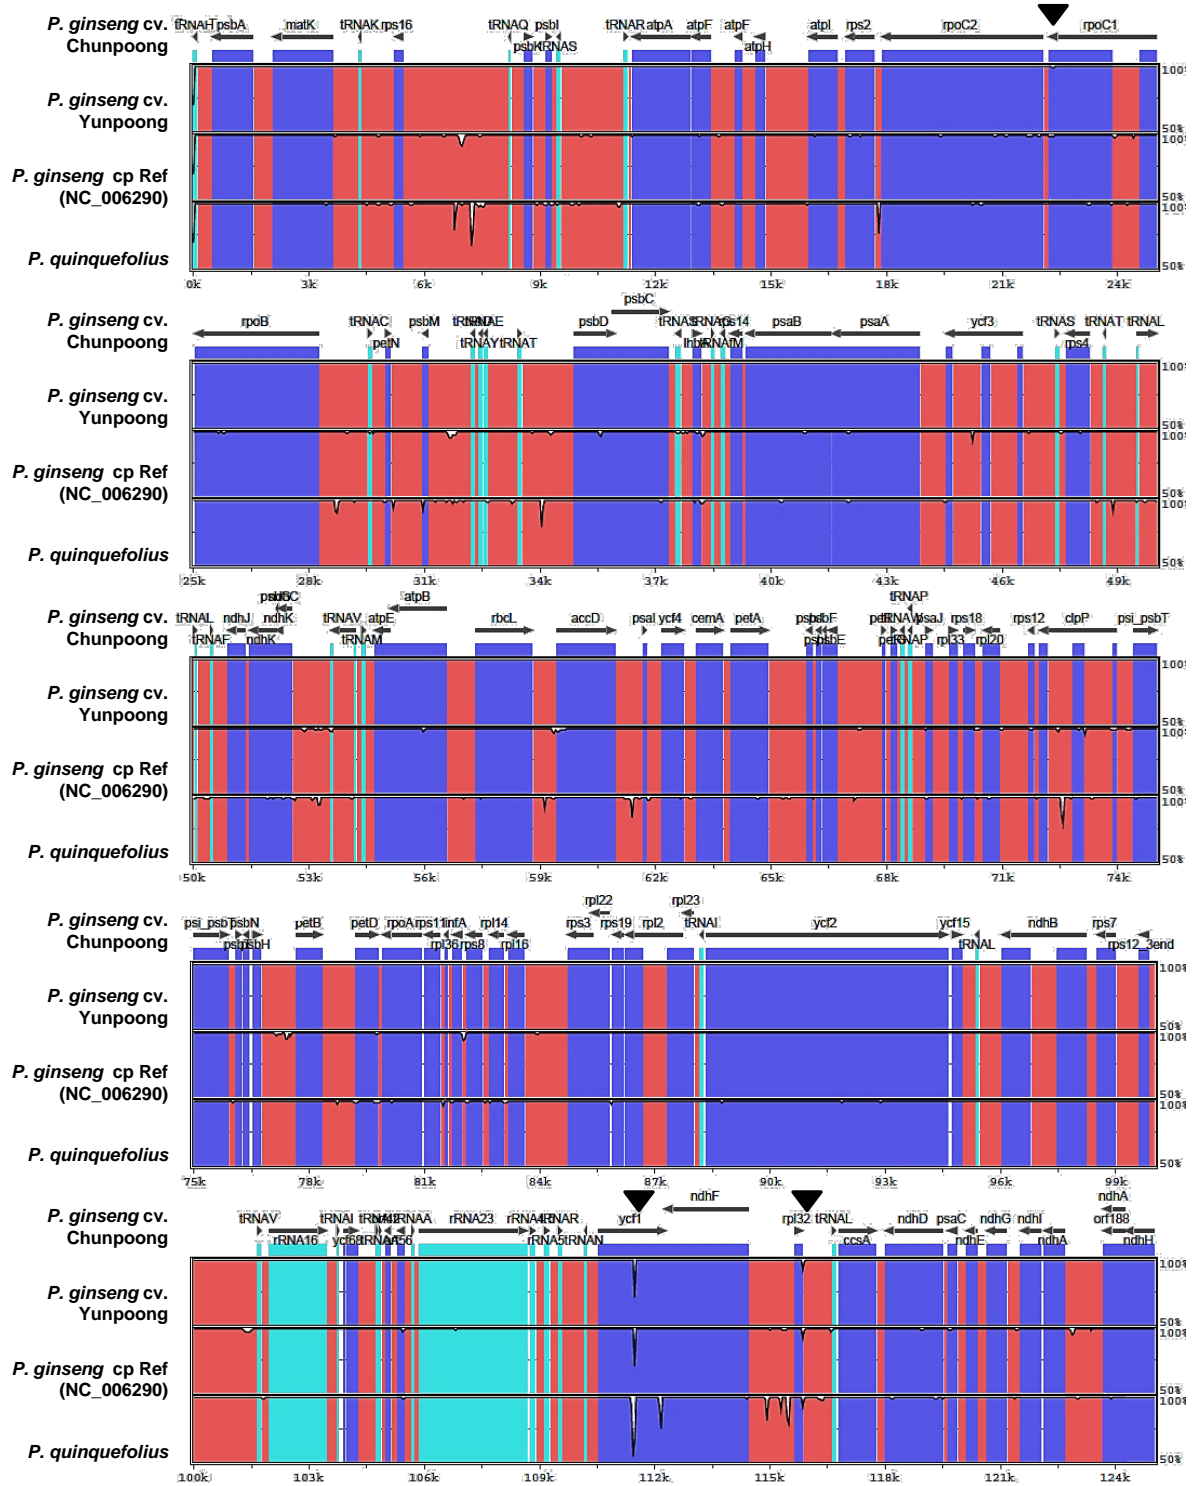

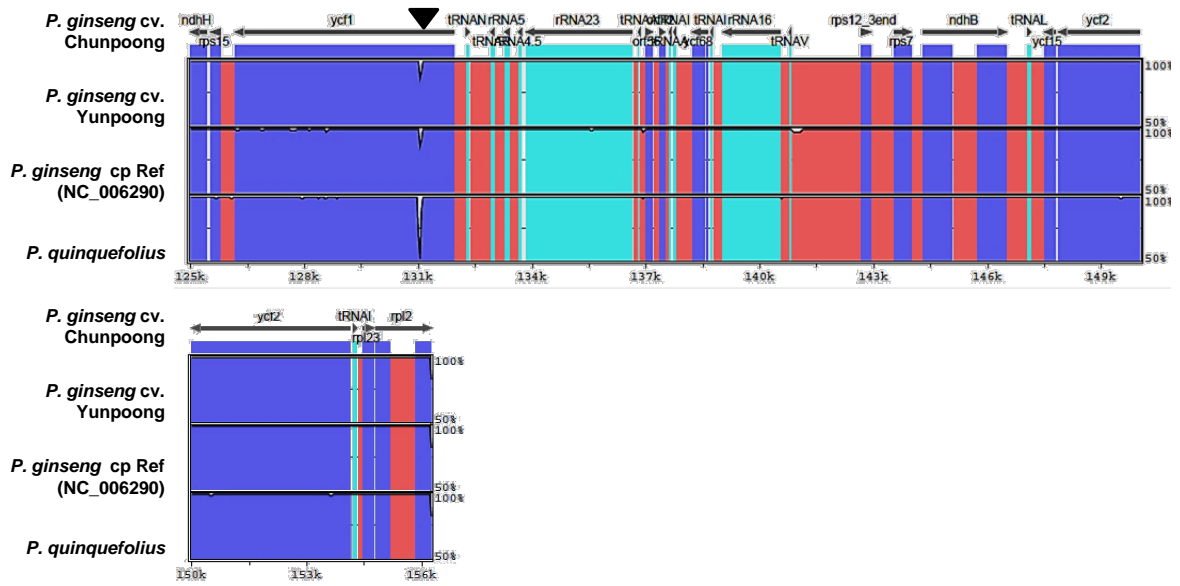

**Supplementary Fig. S13. Comparison of cp genome sequences of *Panax* species.** Complete cp genomes of *P. ginseng* cv. Chunpoong (GenBank Accession No. KM088019)<sup>55</sup>, cv. Yunpoong (KM088020)<sup>55</sup>, and *P. quinquefolius* (KM088018) were generated by the dnaLCW method and the cp genome sequence in GenBank (*P. ginseng* cv. Nees; NC\_006290) was used for comparison. Genic regions were identified using the DOGMA program (<http://dogma.cccb.utexas.edu/>) and the comparative map was prepared using mVISTA (<http://genome.lbl.gov/vista/mvista/submit.shtml>). Filled arrowheads indicate polymorphic regions analyzed in Supplementary Fig. S14.

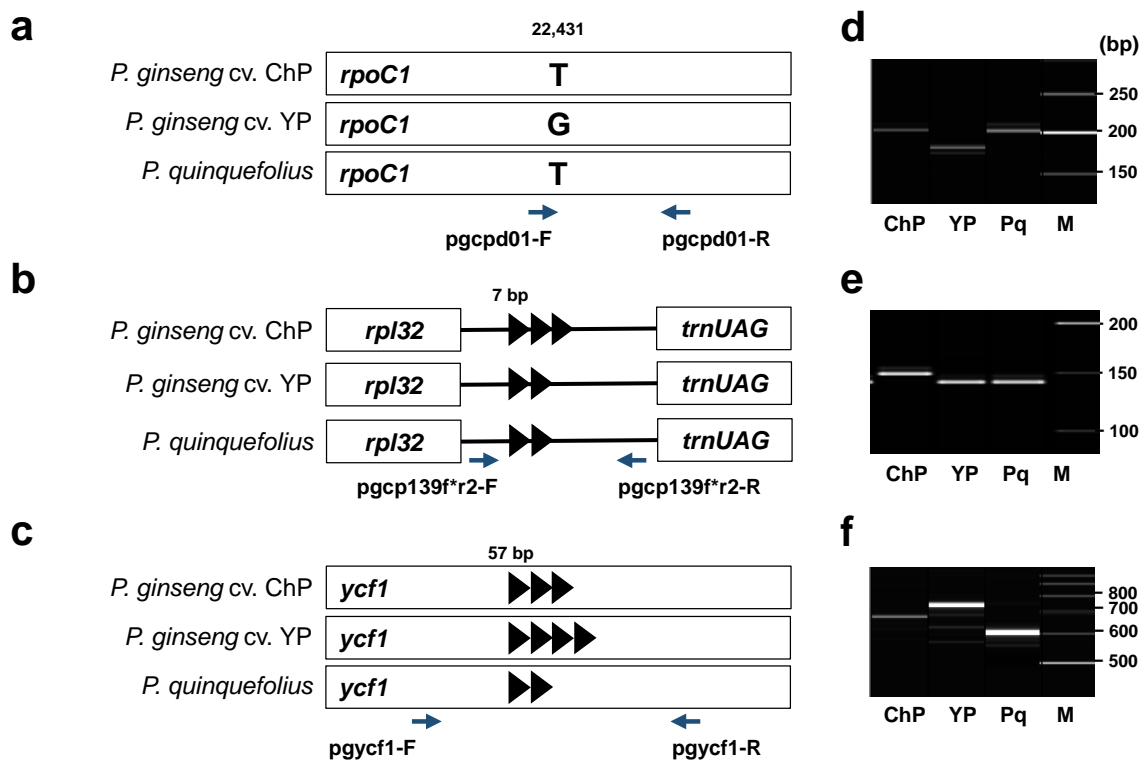

**Supplementary Fig. S14. Schematic representation and validation of three polymorphic regions between cp genome sequences of two *P. ginseng* cultivars.** Complete cp genomes of *P. ginseng* cv. Chunpoong (ChP), cv. Yunpoong (YP), and *P. quinquefolius* (Pq) were compared to identify SNP (a) and copy number variation (CNV) sites (b and c). a and d, SNP analysis using dCAPS primers designed for the SNP site of the *rpoC1* gene. *Xba*I digestion of the amplicon produced a digested fragment only in YP but not in ChP and Pq. b and e, CNV analysis of a 7-bp tandem repeat in the *rpl32-trnUAG* region. PCR amplification confirmed 2 copies of the repeat in YP and Pq, and 3 copies in ChP. c and f, CNV analysis of a 57-bp tandem repeat in the *ycf1* gene. PCR amplification confirmed 2, 3, and 4 copies of the repeat in Pq, ChP, and YP, respectively. Arrows indicate primer sites previously reported<sup>56</sup>. M indicates DNA size marker.

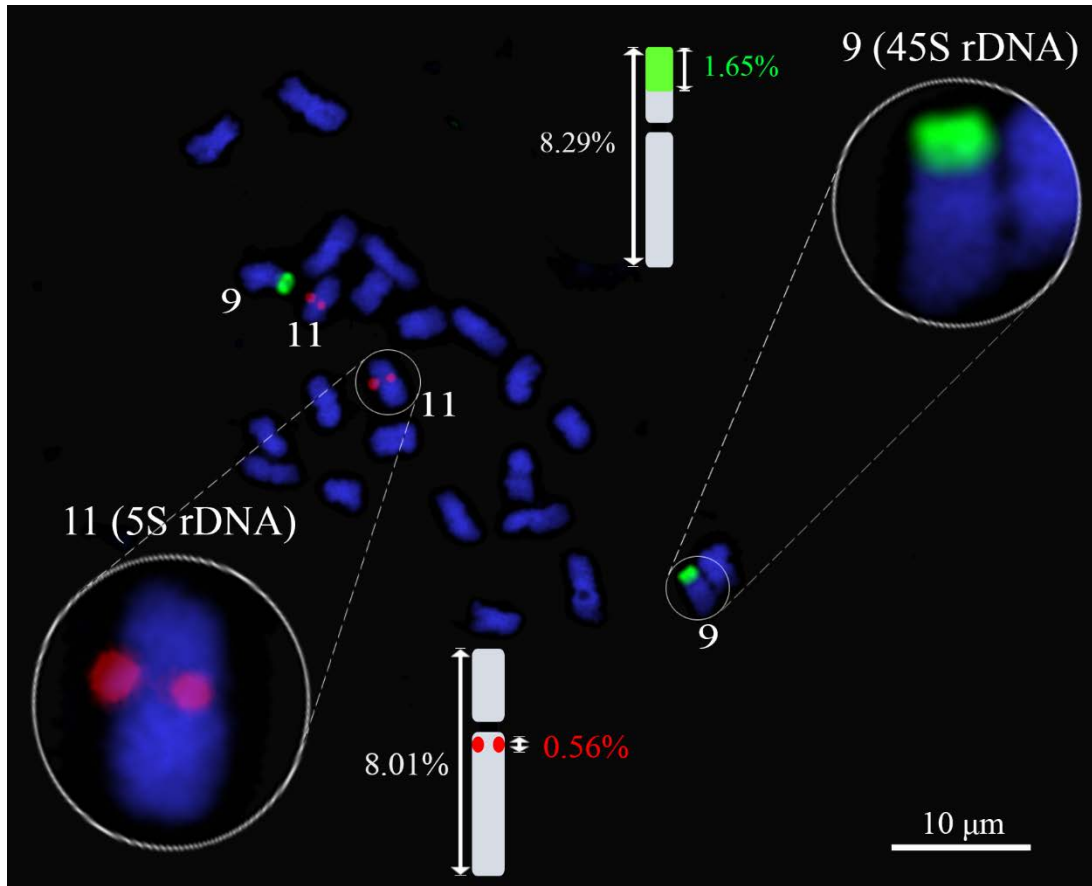

**Supplementary Fig. S15.** FISH analysis of 45S and 5S in *O. sativa* genome. nR content genome was estimated based on the ratio of the area covered by probe hybridization signals to the total chromosome area (Supplementary Tables S4). Values outside parentheses represent the areas of nR-bearing chromosomes or FISH signals, while values inside parentheses represent estimated genomic contents.

## Supplementary Tables

**Supplementary Table S1. Characterization of the 30 longest contigs in the *de novo* assembly of the rice Os2 dataset (1x genome coverage; 50x cp genome coverage).**

| Ctg_no.  | Ctg length (bp) | Ctg Coverage (x) | Best hit in GenBank and TE DB |             |             |           |         | Description                                      |
|----------|-----------------|------------------|-------------------------------|-------------|-------------|-----------|---------|--------------------------------------------------|
|          |                 |                  | Acc. no.                      | Length (bp) | Match begin | Match end | E-value |                                                  |
| ctg_39   | 53,713          | 48.89            | GU592207.1                    | 134,551     | 18          | 53,535    | 0.0     | <i>O. sativa japonica</i> chloroplast genome     |
| ctg_56   | 20,802          | 97.14            | GU592207.1                    | 134,551     | 80,605      | 101,406   | 0.0     | <i>O. sativa japonica</i> chloroplast genome     |
| ctg_911  | 19,415          | 10.76            | BA000029.3                    | 490,520     | 173,036     | 183,181   | 0.0     | <i>O. sativa japonica</i> mitochondrial genome   |
| ctg_40   | 18,492          | 48.63            | GU592207.1                    | 134,551     | 53,516      | 72,007    | 0.0     | <i>O. sativa japonica</i> chloroplast genome     |
| ctg_619  | 16,859          | 12.57            | BA000029.3                    | 490,520     | 214,506     | 228,529   | 0.0     | <i>O. sativa japonica</i> mitochondrial genome   |
| ctg_596  | 16,024          | 10.00            | BA000029.3                    | 490,520     | 343,504     | 359,495   | 0.0     | <i>O. sativa japonica</i> mitochondrial genome   |
| ctg_562  | 12,383          | 47.71            | GU592207.1                    | 134,551     | 101,387     | 113,769   | 0.0     | <i>O. sativa japonica</i> chloroplast genome     |
| ctg_380  | 11,412          | 9.89             | BA000029.3                    | 490,520     | 36,168      | 47,528    | 0.0     | <i>O. sativa japonica</i> mitochondrial genome   |
| ctg_135  | 8,628           | 53.43            | GU592207.1                    | 134,551     | 71,988      | 80,624    | 0.0     | <i>O. sativa japonica</i> chloroplast genome     |
| ctg_72   | 8,112           | 154.94           | MUDR1_OS                      | 8,052       | 966         | 7,715     | 0.0     | <i>O. sativa</i> MuDR-type DNA transposon        |
| ctg_948  | 7,982           | 8.40             | BA000029.3                    | 490,520     | 80,797      | 88,762    | 0.0     | <i>O. sativa japonica</i> mitochondrial genome   |
| ctg_1284 | 7,882           | 8.33             | BA000029.3                    | 490,520     | 382,357     | 390,429   | 0.0     | <i>O. sativa japonica</i> mitochondrial genome   |
| ctg_567  | 7,173           | 29.88            | MDR2                          | 6,967       | 76          | 6,516     | 0.0     | <i>O. sativa</i> MuDR-type DNA transposon        |
| ctg_183  | 7,166           | 12.39            | SZ-55_I                       | 7,062       | 1           | 6,973     | 0.0     | <i>O. sativa</i> retrotransposon SZ-55           |
| ctg_173  | 6,889           | 342.62           | M11585.1                      | 3,377       | 2           | 3,377     | 0.0     | <i>O. sativa</i> 25S ribosomal RNA gene          |
| ctg_180  | 6,776           | 24.93            | RIRE7_I                       | 5,899       | 1,394       | 5,899     | 0.0     | RIRE7 gypsy-like endogenous retrovirus           |
| ctg_316  | 6,622           | 95.83            | MuDR3_OS                      | 8,604       | 97          | 6,666     | 0.0     | <i>O. sativa</i> MuDR-type DNA transposon        |
| ctg_580  | 6,607           | 8.34             | BA000029.3                    | 490,520     | 73,247      | 79,345    | 0.0     | <i>O. sativa japonica</i> mitochondrial genome   |
| ctg_319  | 6,403           | 108.69           | RIRE1_I                       | 5,276       | 800         | 5,275     | 0.0     | RIRE1, a copia-like retrotransposon              |
| ctg_343  | 6,331           | 69.87            | SZ-37_I                       | 8,831       | 1           | 5,674     | 0.0     | <i>O. sativa</i> retrotransposon SZ-37           |
| ctg_265  | 6,210           | 44.78            | CRM-I_OS                      | 5,933       | 689         | 5,933     | 0.0     | <i>O. sativa</i> centromeric LTR retrotransposon |
| ctg_3958 | 6,059           | 7.67             | BA000029.3                    | 490,520     | 207,511     | 213,320   | 0.0     | <i>O. sativa japonica</i> mitochondrial genome   |
| ctg_570  | 5,760           | 9.18             | BA000029.3                    | 490,520     | 163,967     | 169,688   | 0.0     | <i>O. sativa japonica</i> mitochondrial genome   |
| ctg_1105 | 5,713           | 7.93             | BA000029.3                    | 490,520     | 256,888     | 262,540   | 0.0     | <i>O. sativa japonica</i> mitochondrial genome   |
| ctg_2119 | 5,635           | 7.67             | BA000029.3                    | 490,520     | 397,094     | 400,264   | 0.0     | <i>O. sativa japonica</i> mitochondrial genome   |
| ctg_675  | 5,512           | 40.40            | MDR1                          | 7,383       | 867         | 6,361     | 0.0     | <i>O. sativa</i> MuDR-type DNA transposon        |
| ctg_4531 | 5,341           | 8.03             | BA000029.3                    | 490,520     | 299,598     | 304,451   | 0.0     | <i>O. sativa japonica</i> mitochondrial genome   |
| ctg_1460 | 5,281           | 9.83             | BA000029.3                    | 490,520     | 53,451      | 58,496    | 0.0     | <i>O. sativa japonica</i> mitochondrial genome   |
| ctg_2770 | 5,280           | 10.04            | BA000029.3                    | 490,520     | 66,550      | 70,862    | 0.0     | <i>O. sativa japonica</i> mitochondrial genome   |
| ctg_1612 | 5,236           | 9.26             | BA000029.3                    | 490,520     | 65,707      | 70,862    | 0.0     | <i>O. sativa japonica</i> mitochondrial genome   |

The best hit sequences were found by BlastN searches using contig sequences as queries. Contigs similar to sequences from chloroplasts, mitochondria, and ribosome are indicated by green, orange, and blue, respectively.

**Supplementary Table S2. Characterization of the 30 longest contigs among the *de novo* assembly of the ginseng Pg2 dataset (0.05x genome coverage; 50x cp genome coverage).**

| Ctg_no. | Ctg length (bp) | Ctg Coverage (x) | Best hit in GenBank |             |             |           |           | Description                                                   |
|---------|-----------------|------------------|---------------------|-------------|-------------|-----------|-----------|---------------------------------------------------------------|
|         |                 |                  | Acc. no.            | Length (bp) | Match begin | Match end | E-value   |                                                               |
| ctg_3   | 86,351          | 49.12            | AY582139.1          | 156,318     | 1           | 86,125    | 0.0       | <i>P. ginseng</i> chloroplast genome                          |
| ctg_8   | 26,153          | 103.15           | AY582139.1          | 156,318     | 86,107      | 112,177   | 0.0       | <i>P. ginseng</i> chloroplast genome                          |
| ctg_15  | 18,122          | 45.15            | AY582139.1          | 156,318     | 112,159     | 130,266   | 0.0       | <i>P. ginseng</i> chloroplast genome                          |
| ctg_30  | 9,423           | 150.85           | GQ178077.1          | 3,362       | 1           | 3,362     | 0.0       | <i>P. ginseng</i> cv Yunpoong 26S ribosomal RNA gene          |
| ctg_671 | 5,196           | 8.55             | HQ874649.1          | 502,773     | 224,443     | 225,174   | 0.0       | <i>Ricinus communis</i> mitochondrial genome                  |
| ctg_49  | 4,446           | 87.98            | Copia-74_ALY-I      | 5,483       | 1,540       | 5,043     | 0.0       | <i>Arabidopsis lyrata</i> LTR retrotransposon                 |
| ctg_347 | 4,234           | 12.01            | Gypsy18-PTR_I       | 7,283       | 640         | 4,969     | 0.0       | <i>Populus trichocarpa</i> LTR retrotransposon                |
| ctg_269 | 3,671           | 7.49             | GQ856147.1          | 3,792,376   | 277,261     | 278,161   | 0.0       | <i>Citrullus lanatus</i> mitochondrial genome                 |
| ctg_41  | 3,555           | 21.38            | Copia-88_VV-I       | 7,228       | 1,627       | 2,612     | 4.00E-174 | <i>Vitis vinifera</i> LTR retrotransposon                     |
| ctg_658 | 3,462           | 4.13             | EU365401.1          | 509,941     | 103,101     | 103,722   | 0.0       | <i>Bambusa oldhamii</i> mitochondrial genome                  |
| ctg_258 | 3,447           | 4.27             | HQ874649.1          | 502,773     | 223,813     | 224,397   | 0.0       | <i>Ricinus communis</i> mitochondrial genome                  |
| ctg_181 | 3,350           | 43.54            | EnSpm-6_STu         | 6,594       | 3,865       | 4,636     | 3.00E-50  | <i>Solanum tuberosum</i> EnSpm DNA transposon                 |
| ctg_321 | 3,346           | 4.86             | JQ248574            | 281,132     | 118,398     | 119,277   | 0.0       | <i>Daucus carota</i> ssp. <i>sativus</i> mitochondrial genome |
| ctg_428 | 3,242           | 6.19             | JQ248574            | 281,132     | 225,651     | 227,064   | 0.0       | <i>Daucus carota</i> ssp. <i>sativus</i> mitochondrial genome |
| ctg_256 | 3,189           | 23.66            | EnSpm2_PTr          | 12,422      | 2,262       | 2,393     | 3.00E-28  | <i>Populus trichocarpa</i> EnSpm-type DNA transposon          |
| ctg_34  | 3,147           | 6.08             | JQ248574            | 281,132     | 152,185     | 153,281   | 0.0       | <i>Daucus carota</i> ssp. <i>sativus</i> mitochondrial genome |
| ctg_359 | 3,142           | 13.20            | Copia-3_CP-I        | 4,073       | 1,463       | 2,198     | 1.00E-140 | <i>Carica papaya</i> LTR retrotransposon                      |
| ctg_407 | 3,077           | 16.79            | MuDR-1_STu          | 9,408       | 1,590       | 1,687     | 2.00E-09  | <i>Solanum tuberosum</i> MuDR-type DNA transposon             |
| ctg_93  | 2,900           | 4.55             | EU431224.1          | 476,890     | 136,810     | 136,903   | 2.00E-29  | <i>Carica papaya</i> mitochondrial genome                     |
| ctg_352 | 2,893           | 39.53            | GYPOT1_I            | 5,099       | 2,780       | 3,366     | 3.00E-87  | <i>Populus trichocarpa</i> internal sequence of GYPOT LTR     |
| ctg_157 | 2,637           | 4.77             | JN375330.1          | 715,001     | 704,715     | 705,342   | 0.0       | <i>Phoenix dactylifera</i> mitochondrial genome               |
| ctg_101 | 2,609           | 10.09            | Copia-72_VV-I       | 4,168       | 2,384       | 3,690     | 1.00E-153 | <i>Vitis vinifera</i> LTR retrotransposon                     |
| ctg_935 | 2,556           | 4.15             | BA000042.1          | 430,597     | 127,414     | 127,860   | 0.0       | <i>Nicotiana tabacum</i> mitochondrial genome                 |
| ctg_833 | 2,534           | 5.41             | Copia-4_PD-I        | 4,256       | 1,437       | 1,511     | 4.00E-07  | <i>Phoenix dactylifera</i> LTR retrotransposon                |
| ctg_631 | 2,466           | 5.16             | AY061993.1          | 4,584       | 824         | 1,259     | 0.0       | <i>Daucus carota</i> mitochondrial genome                     |
| ctg_420 | 2,460           | 30.33            | PSAT6               | 607         | 456         | 553       | 3.00E-11  | <i>Pisum sativum</i> dispersed repetitive DNA, PSAT6          |
| ctg_240 | 2,385           | 19.22            | MuDR-5_ALy          | 9,235       | 2,468       | 2,573     | 3.00E-13  | <i>Arabidopsis lyrata</i> MuDR-type DNA transposon            |
| ctg_26  | 2,380           | 34.72            | Gypsy22-VV_I        | 5,609       | 1,978       | 2,480     | 1.00E-64  | <i>Vitis vinifera</i> LTR retrotransposon                     |
| ctg_687 | 2,338           | 5.31             | FR714868.1          | 396,947     | 135,650     | 136,768   | 0.0       | <i>Malus x domestica</i> mitochondrial genome                 |
| ctg_75  | 2,240           | 120.50           |                     |             |             |           |           | No hit                                                        |

The best hit sequences were found by BlastN searches using contig sequences as queries. Contigs similar to sequences from chloroplasts, mitochondria, and ribosomes are indicated by green, orange, and blue, respectively.

**Supplementary Table S3. Summary of cp genome assembly using different amounts of WGS data from *O. sativa* (cv. Nipponbare) and *P. ginseng* (cv. Chunpoong)**

| Species           | Dataset | Amount of WGS used | Coverage (x) to     |                 | No. of cp contigs <sup>c</sup> | No. of errors in the initial assembly |            |                |              |              |
|-------------------|---------|--------------------|---------------------|-----------------|--------------------------------|---------------------------------------|------------|----------------|--------------|--------------|
|                   |         |                    | Genome <sup>a</sup> | Cp <sup>b</sup> |                                | False gaps                            | False SNPs | Tandem repeats | Mono-polymer | Total errors |
| <i>O. sativa</i>  | Os1     | 215,000,114        | 0.5                 | 24.63           | 4                              | 1                                     | 5          | 0              | 2            | 8            |
|                   | Os2     | 430,000,026        | 1                   | 49.31           | 5                              | 5                                     | 2          | 0              | 0            | 7            |
|                   | Os3     | 860,000,052        | 2                   | 99.26           | 5                              | 0                                     | 0          | 0              | 1            | 1            |
|                   | Os4     | 1,290,000,078      | 3                   | 148.67          | 3                              | 4                                     | 0          | 0              | 0            | 4            |
|                   | Os5     | 1,720,000,104      | 4                   | 198.48          | 3                              | 3                                     | 6          | 0              | 0            | 9            |
|                   | Os6     | 2,150,000,130      | 5                   | 248.5           | 3                              | 2                                     | 0          | 0              | 0            | 2            |
|                   | Os7     | 4,300,000,260      | 10                  | 496.03          | 4                              | 4                                     | 0          | 0              | 1            | 5            |
|                   | Os8     | 8,600,000,520      | 20                  | 980.42          | 4                              | 7                                     | 7          | 1              | 0            | 15           |
|                   | Os9     | 25,800,001,560     | 50                  | 2,534.87        | 6                              | 2                                     | 1          | 0              | 1            | 4            |
|                   | Os10    | 44,425,734,760     | 100                 | 5,006.54        | 10                             | 13                                    | 38         | 3              | 1            | 55           |
| <i>P. ginseng</i> | Pg1     | 75,750,000         | 0.025               | 24.49           | 3                              | 6                                     | 4          | 3              | 0            | 13           |
|                   | Pg2     | 151,500,000        | 0.05                | 49.89           | 3                              | 9                                     | 2          | 1              | 0            | 12           |
|                   | Pg3     | 303,000,000        | 0.1                 | 99.06           | 3                              | 4                                     | 0          | 2              | 0            | 6            |
|                   | Pg4     | 454,500,000        | 0.15                | 150.38          | 3                              | 3                                     | 1          | 2              | 0            | 6            |
|                   | Pg5     | 606,000,000        | 0.2                 | 200.54          | 3                              | 3                                     | 0          | 2              | 0            | 5            |
|                   | Pg6     | 757,500,000        | 0.25                | 260.13          | 3                              | 3                                     | 0          | 2              | 0            | 5            |
|                   | Pg7     | 1,515,000,000      | 0.5                 | 512.77          | 3                              | 0                                     | 0          | 4              | 0            | 4            |
|                   | Pg8     | 3,030,000,000      | 1                   | 1,044.53        | 3                              | 4                                     | 0          | 2              | 0            | 6            |
|                   | Pg9     | 7,575,000,000      | 2                   | 2,564.97        | 3                              | 1                                     | 0          | 3              | 0            | 4            |
|                   | Pg10    | 15,150,000,000     | 5                   | 5,101.95        | 3                              | 2                                     | 0          | 2              | 0            | 4            |
|                   | Pg11    | 30,300,000,000     | 10                  | 10,008.88       | 2                              | 0                                     | 2          | 5              | 0            | 7            |

<sup>a</sup> Coverage to genome was determined by calculation of ratio of total bases to genome size (430 Mb of *O. sativa* and 3.12 Gb of *P. ginseng*). <sup>b</sup> Coverage to cp genome and nR sequence were based on contents of cp and nR reads determined by mapping raw reads to reference cp genome and nR sequence. <sup>c</sup> Number of contigs representing the entire cp genome sequence.



**Supplementary Table S4. Estimate of nR content based on FISH signal size in the rice genome**

| Chr. no. | Relative size (%) in the genome |      | Estimated DNA content (Mbp) |                   | Estimated nR copy number |
|----------|---------------------------------|------|-----------------------------|-------------------|--------------------------|
|          | Chromosome                      | nR   | Chromosome                  | nR                |                          |
| 1        | 10.84                           |      | 46.61                       |                   |                          |
| 2        | 10.03                           |      | 43.12                       |                   |                          |
| 3        | 9.24                            |      | 39.71                       |                   |                          |
| 4        | 9.10                            |      | 39.13                       |                   |                          |
| 5        | 8.71                            |      | 37.47                       |                   |                          |
| 6        | 7.78                            |      | 33.46                       |                   |                          |
| 7        | 7.74                            |      | 33.30                       |                   |                          |
| 8        | 7.05                            |      | 30.31                       |                   |                          |
| 9        | 8.29                            | 1.65 | 35.67                       | 7.09 <sup>a</sup> | 894 <sup>c</sup>         |
| 10       | 6.86                            |      | 29.51                       |                   |                          |
| 11       | 8.01                            | 0.56 | 34.46                       | 2.40 <sup>b</sup> | 7,409 <sup>d</sup>       |
| 12       | 6.33                            |      | 27.24                       |                   |                          |
| Total    | 100.00                          |      | 429,88                      |                   |                          |

<sup>a</sup>45S, <sup>b</sup>5S, <sup>c</sup>based on one 45S unit of 7.928 kb, <sup>d</sup>based on 324 bp Nipponbare 5S unit length. Note: 5S and 45S loci are based on previous studies.

**Supplementary Table S5. Number of monopolymer tracts in cp genome sequences of rice (*O. sativa J. cv. Nipponbare*)**

| Monopolymer type    | Number |
|---------------------|--------|
| (A) <sub>8-13</sub> | 49     |
| (T) <sub>8-17</sub> | 40     |
| (C) <sub>8-11</sub> | 4      |
| (G) <sub>8-10</sub> | 2      |
| Total               | 95     |

**Supplementary Table S6. Primers used for validation of cp genome polymorphism**

| <b>Primer name</b> | <b>Primer sequence (5' → 3')</b> | <b>Tm (°C)</b> |
|--------------------|----------------------------------|----------------|
| Os07-F             | TGGATGAATCAGTTCAAAGAATTTA        | 59.1           |
| Os07-R             | GTGCCGCCTGATCAATAAAA             | 61.0           |
| Os17-F             | TTCCGCTACACATAAAAATGGA           | 60.7           |
| Os17-R             | TCCCTTCGTAACCAGTCGTC             | 60.1           |
| Os18-F             | AACCATGGGTCGCTTCTAGT             | 58.7           |
| Os18-R             | GGGAGGAGTGGACTCTAGG              | 60.1           |

## Supplementary Datasets

### Supplementary Dataset S1.

The cp genome sequences of seven *Oryza* species. WGS sequences of these seven accessions were retrieved from GenBank (Table 1) and the cp genome sequence was obtained using the dnaLCW method. The header of each FASTA sequence indicates species name and accession number.

>O.rufipogon\_AC111008369\_cp

```
cccaatacttgccttcagcaagatattgggtatttctagctttcttctcaaaaattgctatatgttagcagaaaagccttatccattaagagatggaactcaagagcag
ctaggcttagaggggaaattgtgagcattacgttcgtcattactccataccaagattagcagcgggtgatgatacagcccaagtattataaacgcgacctggctatca
actacagattgggtgaaattgaatccgtttagattgaaagccatagctactaaacagcagtgacccaatcctactacagcccaagcagccaagaagaagtg
taaagaacgagaggtttaaactgcatattggaagattaatcgccaaaataacctagcggccacaatattataagtcttctctcttgaccaaatctgtaacct
cattagcagattcgtttcagtggtttccctgatcaactagaggttcaaaaggaacctgatagcactgaatagggaaccgccgaatacaccagctcacactaac
atgtgaaatggatgcataaggtgattgctctgcctggaatacaatcataaagtgaaagtaccagatattcctaaggcataccatcagagaaactccttgacca
tagggtaaatcaagaaaacagcagtagcagctgcaacagagagctgaaatgcaacagcaatccaaggacgcataccagacggaaactcagttcccactcacga
cccatatacaagctacaccaagtaagaagtgtagaacaattagctcataaggaccaccattgtataaccatcacaacagatgcagcttcccaattgggtaaaa
gtgcaatccgatcggcagcaagtaggaataatggcaccagagataatgtttccgtaagtaagaaccagaaacaggctcacgaatacatcaatctactg
gaggggcagc gatgaaggcgataataacagaaagttgcggcgaataaggtaggatcatcaaaacaccgaacctccgatgaaagacggtttccggtgctag
ttatccagttgcagaagcgacccacagcgttacttccgctctctaaaattgcatgcatgtaagatcttggtttattcaattgcaaggactcccaagcacacg
tattaactagaaagataagaagcgttattttaaactgataatagctatataccaatgcaaccaagccagccccgacagttgtatatacacaacaaaattta
ccaaacccaaaaattttgtaaatgaagtgaagtaaaaaactcaaaactcagattgctcctttctagttccataggggtgcccgggactgaaaccggaactagtcggat
ggagtagataattctctgttacatagaaaaaacctctcccaaatcgtcttgcatttttcattgcacacgactttccctatgtagaaataggctatttctattccg
aagaggaagtactaattttttagtagtaagtgtattcacttactatttattatagtagacaacattcagaatggaaactgtgaaagtttaccctgatcattatcaat
catttctagtttattagttttgtaaatgattaatfaagaggattcaccagatcattgatcggagaatataccaataccaatacgcctactgtgcgatccacggaaagaa
aagtaagttgtttggcgaacatcaagaaaaaactgctcttctccgtaaaaaatcttctaaaaataccgaaccaaccattgcataaaaagctcgtaccgtgctttat
gtttacgagctaaagtctagcgcgatgaagtcgaagtataatacttagtcgatacaaaagcttctttttgaagatccactgtgataatgaaaaagatttctacatccg
accaaaaccgatcaagaatataccaatccgataaatcggcctcaaatgttttactaataaggatgccccgatccagtaaaaattgggcttttgcataaagatccaatgaga
ggagtaacagggactttggatcgaatttttcttctgagatctattgaaatgaattctccagcattgtattcctactaacaagaattttattgtagactgaaaagtac
cccagaaaatcgaagcaagagtttctaattggtttagatgtagcctttggcgggtgagtcacaaaagagaaaagaatattgccacaaacggacaaggtaacattccatt
tcttctcaaaaagaaaagttctttgatcaagaattgccttctctgatacgaacataatgcataaggggatccataacgaacatattggtttccgaaaaaacgag
ggtacattaacccaaaatgttccatctctagaaaagatgattcgtccagaaaaggtccggaagaagtaatcgaagcaagaagattgtttacgaagaacaaca
agaaaaatcattctgatacataagagttataggaaccgaaatagcttttatttttcaaaaataaaaatggatttcattgaagtaataaaaatattccaaatcga
gtagtagttgagaaaatcgcgaataatgcaaggatggaacatctggatccggattgaaaggagttgaaagcaagatccaaatggataggatagggtatttctat
atgtctagataatgtaagtgcaaaaattgtcttcaaaaaggaatattgaatgaatagatcgtaaattctgaaactttggtatttcttttctccggacaagactgttc
tcgtagcagaaatgggatttctagaacgatcgcacccccctcagatagaatctgagaataaaaactcagaataaaaaaattgtgtaatccaataatcgaactgtgta
ggatgattaaaccaaatataccaataattctgctgatacattcgaatcaaccgtttcacaagttagtaactaaattctgttattagaaccaataatttcgacaagttc
ggaaccatttaatacataatcatgggcaaacacataaatgtactcctgaaagagtagtgggtagacgaaatattgcttaggaaatttaagttttctgaataaccctcga
attttccattgtatttctacttgaatcagagagagaaatatttctcggttatcaaatgggtatatacagaatattggtcagaacagggtgtgcatttttaatacaa
accctggggaagaaaaggagctaatccacggatcttttccgctctttctatccaattgtttatgtttgttctaatcaaaaagagaacaaaatcctttattttgaggg
ccaattgcttttgactttgggatacagctctttatcaataactgcttctttacacattcaatccataacatcctttcaatccaaaatcaagaataataggattctaaa
aaaaaaaagaaaaatcaaaaggtctactcatagaaaaccagctttccctacatcaggcactaaatctatttttaacgtctaattagatcagggagttctcaatfaaga
agtaagctcgtgctttttaccagaattggagccaggtctatccattattcattagaccagaaaatcagaattttttattccattccaaaaatccaaaataaga
aattgattttatcagacatgctatttttccattacccttgaggatcagtcgcggctctatagactctaccaagagctggacgaatttttcttcatccaaatgtgta
aaagatcatagtcgcaactaaaagccgagtacttaccattgagttgcaaccagataaactaggatcttagatacagcgaatccaaaatcaatggaattacac
cgcacaccctgtcaaatctaaaatagcaagacattaaaagaaagattttaccattgaaacactcagataccaaaaggaaccgggtctggttaaatcactaa
ggttaaaagtgccaccaatcacgatcgtaaaattgtcatttttttagcattttttatataaataaataaataatctgtatgagagtacaaacagagggacaaccctacca
tttgagcaaaagttagagcaaaaacctaataaggagtgaggataaagagacttatccatctacaaattctagatgttcaatggaccttgcattgaaatacaatgtg
aagaaaaaatttagatagaaaaactcaaaaaataaaggcttatgttggaattggcacgacataaatccagtcacaaaatagattaaagaagagcgaattatttctaa
atagttagacaacagggatactagtgagcctcctagttttttattgatttagcttcaattaactcaaaagttcttttcttttaagaattccgccttcttaaaatc
agaactgttcttaggttgagcaccttttcaaggaatagagaatagctggaacattaaacaaagtttgattctttatcgatcataaaaactatttccgaagatct
cttcttctctcagatcgaacatcaattgcaacgatcgtatgagacgcttattgggatagatgtagataaacaagccccccctagaacgtataggaggtttctcc
tcatacggctcagagaatgacttgcatttaattccgtacagaaaaacaatltcattatactatgactcaagttgactaattttgattgacagacttgaagaaaaaa
atcctttgaaatttttgagtcgtcttaaaccttttcttccctcatctcgaacaaatcacttttattccttattccgggtccaattctattgttagacagttgaaatcgtgtt
actgttcgggaatcctttatcttattgtgaaatccttgggttaaacattactcgggaattctattcttttcttcaaaaagagtagcaacataaccctttttcttattctc
tcgataaaagcatttcccttctatagaatcgaatagagcattgattctgatacatttaatacaaaagattttccatattctccaaaatggactttctctatttttaa
```

ccctttgatttctatatatttcgatttctatatfaagggtagaatgacaaagttggcctaattfattagtttccactaacctagattcttcccttgataaaaaataaattctgct  
ctctcgagctccategtgtactatttacttagcttacttacaacaaccagcgaataatcggctcgggacgaatagaacagactatgctgagccaaagcatttctt  
actatggaaaagtggtagacaaaatccacaatcgatcgtgctctcaagtcgacgttcttaccacatcgttttaaacgaagtttaacataacattcctctaatt  
tcattgcaaaagtgtataggggaattgatcaatagggatggaatcatgaatagtcattggtttttgtataactaacattgcttctctatgagaaataga  
ataaaagaaatfaagatttactgggaagactcgcgaagagccaaatttattaaaccatattctatcatatgaatgaatatagttcgaaaaaggggaataaacag  
ttgcttaagacttatttattatggaatttccatcctcaacagagactcgaatgatcaatcctgaaatgataagagaagaattgactcttccaacaaataaa  
ctatcaacctcccgttaattatattatataatattagattagcaatctattttccataccattttccgtaacaaaactaataactattaactagtaaacattgcaatga  
aaagaaagttttgtagttagtaagaattctgatttctcgaactcgaataccaaaaaagaaagaaaaaatgaagtaaaaaaacgatttctgtaaaataaag  
gtcttctgatttatttttcttttactaaaagaagcaactcctcaaatcaaatgaatccattctatcaacgagcagttctatcttaccgggatggtacattctg  
gatatttaaaaatcgcggatcgagatcgttttcgttaaccaaaagaagaaaaagaagaaggaaactttttactaataaaaactataaaaaaatttatctatcat  
aaatctatctaccataaaggaataggtctctgttttatacaatgttctacgtcaagtttaaaatttttcatgaaaaaagatttcaatttgactggactgacactggatt  
atgtttctgagacagaaaatgaacgattagactgcatcgaatcaaggttataagagaaaaaattctttaaataaactttatgctcgtgcagaatacaatcag  
attctatcttctgttcatcagaaaaatctgggacggaaggattcgaacctccgagtaacgggacaaaaccgctgcttaccactggccacgccccatttccggg  
ttttatgacactaataaacagtattatgttttcttattcgtcaatcctactcaatataaaaaatggggggtattcttctgttaggattctagacatcgaataat  
agaatcaaaaaatgcatgattacatggaattctattaagattatatagaagtcgaatttctcactctcattgagagtcgaatacaaggaggtatttctgtt  
gggaaagtccgaagaaaaaggatttgaatctccttttcccttagaaaaaactcaatcaaatccaatctactctacaagaacgaaacgcttgttatg  
cctaatacttagttaacctgtatttgaattctgttattatccgactagttttctcgcacaaatgccgaagcttatgccatttcaaccaatcgtgattttatg  
ctgtcactactgtactttttctatttagccttggttgcaagctcgtgtaagtttcgatgaatcttactactctgtctgccaaatgaaatcattctaaaaaaa  
ttcgaaaaatggataagagccgagaaatcttataatgaacctcgaattcaaaaactcaaatcttctacattgaaatgataagctcagcaataaatttggatcagccttc  
tactcctgcatctacgttgagcaggtatcttagtaaccgcacaatacctaaccataatttattgataagagtgcttattataaatcaattctgcaattttttc  
atftttgcaatttttaggtgcaaaaatacaaaaccatcctagtggattgtgtgtaagaaaaaacggtaacttattccttaaaaaaacttggagattatgtaag  
cttactctcaactttttgttatacagtagtattcttgtttcccttcttcttggattctatcaatgatccaggacgtaactcctggcgtgacgagtaaaaaatcaa  
aatttttctacaattggatttgttatacatttatctacgagaaaatccgggggtcagaattcctcaatcgaagtcaccaaacgatccgagggggcggaaaga  
gagggattcgaacctcgttacaaaaaatgtacaacggattagcaatccgccctttagtccactcagccatctctcccgttccaatcgaaggttccggtgat  
atgacagaggcaagaataaacgattgcaaaaaatcctcttttcttcaaaagtcaaaaaatfatattgcaattccattttagtattcttttcttaagttaataaa  
aaaaagaagaaaatcttcttttcttaattcaaaaatggatattggctaaaagacaatcagatagatttctctcagcagcatttccatagactgttataata  
aaacaagcaggtatagaaaaaactcttttttattattatcaaaaagcaaaaagggtcttatacaaccaaccaccataaaaatggaaagaaagataagta  
agtggactgactccttgaatgagcccttatccgctattctgatataaaatcagatgagatgaaatgataagtggaattttttagtctttagacttagaccacgca  
aggcaagaaattctcgtatfactattctatattctgttactagatgtctataggaataagaagaatcgaaccccttccgctacacataaaaaatggatttcaaggt  
caattttcttcaatattcttactttttcagaatcctattttgtcttataccatgcaatagagagcagtgaggaaagagaggttactttttcattttcccttaaaaa  
taggcttcttggaaataggaaatcaggaataatcctgaattcctaatgtttattctatagataaaaaactaattgaatcaaatcattgatttaccacgacctggcgtg  
tgaccatagataaaaaatgcaaaaattctatctcagaccattgaaaaaggcattgaaagagaaaaaacgtccacagataatctatcgtatccttggaaagtgat  
ataagtgctcggaaatggtgaagtaattgaataggagatcactatgactatagcccttggtagagttactaaagaagaaaatgatttattgatattggacgact  
ggttacgaaggaccgtttttgttaggatgtctggcctattgcttttctgtctatttccgtttaggaggttggttacagggacaacttttgaactcttggat  
accatggattggcagattcctatttggagggtgcaatttcaaccgacagatttccaccctgccaatgattagcactcttgttactactatggggcccgga  
agcacaaggggatttactggtgtcaattaggtgtctgtggactttgtctctccatggggccttgcactaataaggtttcatgttacgcaattgaaactgctc  
ggtctgtcaattgggcttataatgcaattcattctctggcccaatcgtgttttgttccgtattctcactggggcaatccggttgttcttgcgccga  
gttttggctagcagcagatttctcattctcttccaaggattcataatggacgttgaaccatttcatatgatggaggttccggagatttagggcgcgctct  
gctatggctattcatgggcaaccgtggaaaactctattttaggacggtgatggtgcaaatcctccgctttaaaccaactcaagctgaagaacttattca  
atggtcaccgtaactcgttttggccaaacttgggtgtgcttttccaataaacgttggttacatttcttattgctatttaccggctaccggtttatggatgagtgctat  
tggcgtatcggcctggctctgaacctacgtcctatgactcgtttccaagaaatccgtgcagcggaaatcctgaattttagacttctacacaaaaatattctt  
taaacgaggttattcgtcgtgagtcagctcagctcagctcagctcagctcagctcagctcagctcagctcagctcagctcagctcagctcagctcagctcagctc  
tttagctgtcgtgaccaagaaccaccggtttgttggggccgggaatgccagactatcaatttgcgggtaaacacttggagctcagctagcctatgccccatgagg  
attaatctattctggccggagcaatgaacctatttgaagttggccatttctgaccagaaaaaccatgtatgaacaagggttatttacttccgacttactct  
agggtgggagtagggccggggaagttctagatacttttccgtactttgtatctggagacttctatcaatttctcccgactttagcttggcatttateca  
cgccttctgggaccggagactcttgaagaatctttcattcttggttatgtgtgaaagatagaataaaaatgactacaatttgggtattcactaatttggtaggta  
taggtcttttcttagtactcaaaactcttttttggcgtatataatgatactgggctctgggggagagatgaaagaaaaatccaatttacccttagccccg  
gtgtatatttggatttactaaaatccccttttgggggagaggttggattgtatgtggatatttagaagataaattggggacatgatggttgggttctatttgg  
tatttggcgaatttggcatctfaaccaaaccttccatgggctcgcctgattttagtggagaaacttacttcttatattttaggccttattctgtcttgg  
gtttatcgtctgttttctgttcaataatacagcttaccgagtgattttaggactactggccagaagcttcaagctcaagcatttcttagttagaga  
tcagctcttggagcaatgtggatctgccaaagaccacaggtttaggtaaatatcaatgcgttcccaacgggagaggtatttttggagggaaactatgag  
ttttggacctctgctccatggttagaactcctaaagggcccaacggttggactgagtaggtgaaaaaagacatacaaccttggcaagaacgacttccg  
agaatataatgacctgctccttagctctttaaattctgtgggtggctgtagctaccgagatcaatcagtttaatttatttctctagaagttggttagcacttccatt  
ttgttaggatttcttttttgggccatttggcatgcaggaaagagcccggctgctgcagcaggatttgaaggggaatcgtatgatttggagcctgtctt  
acatgaccttcaactaagatttcttattatactgttctactgttttttctgtctgctggttattctatctagccgagccattcttctatgaaagaaagataa  
ggggacagaacaaaaaaacaaataaagaacaaacgtattcaatcgaacaaagaaagagagagaaagcaaaaggagagagggattcgaacctcga

tagttcctagaactataccggtttcaagaccggagctatcaaccactagccatctctccacagcctaatecttattttattcctacaataagaacatagccatacgaaa  
tgactactaacccttagaaacatctcaatacaaatccctttc gatatacttctgtactgtatccatgtatacaggatccgctatataccgctgtgaaataaagcataa  
aacccctcaaccatatacaataaaaaaagggtgagtaataagttttaaagagaagaatcaatggattcatgattaaccctctacttctgtttttattacaat  
tttgattaagtgaggatcaataataatgtagcaactttattgtatgtaactggaggattagaataatgactattgctttcaattagctgttttgcaattatgtact  
tctcagcttagtacttagtactccctgtattgtctctctgatggttgctcaaaataaaaacgttattttccggtacatcattatggattggactggtctttctgg  
tagctattctaaattctctcatttctaaatgtgttttagtatttagtagccgatacaaaaataaaaaaggccgtttattcggattgtgagacgcattaaaatgcaattgccc  
cccgaattgattgacagacaataaataaaaaagaaaactcaaatagaataaagaacggctgacccagacatagacggctgacccaggcggatataccctata  
aaatagtagacgtagcagcgtatgtcaatggtaaaaatctccttgccaaggagaagatagcgggttcgattccgccgctgccagcttaatttagtaaggactat  
gataaaaaattagctacttatttaaaagtaatagggttagtctagtagccgtagcccttactatcttagcccccttgcacccactcaaaaaagagcactacagcg  
gggggaatcgaactcggcaacaggggtccctaaaccggggtaccgaaacaaacaaccagcaaacagcttttaaaggggagggagatagactgtgcctttctt  
tcattttttttctttctgcaaggtaggggcttgagagttctctgtgtgtagcaagttacttgcacactgctcaattggccttatagggtcgggaactaatgaata  
aaaagggttgataccgccaaccaccagccctctaccatatacagacaataagaatgtcctttatagactgctaagtcgggagacgggaatcgaaccctg  
gacctcaaggttatgacctcgtgagctaccaactgctctactccgctctggagcgtggaacgggtggacgaaaaaggtgaaacagccctctaccatgtct  
agacaataagaatgtttttatagcaaatggagcgggtagcggggaatcgaaccgcatcgttagcttggagggtaggggttatagtcgactgtgtgattattat  
taactgtctcaattcaaacggaacatgaaatttgattcactcggctctttatgggtatctcaccacttaacatctaaagtcagctttttgtctgatggaaccaaggct  
ctctgcttctagatgatccctaaagagtaggagatagaattgcttaaatctatctaaacttaacttctgcttccctaaattcatttaagagatctgagaaaaaagattg  
ggttccaccgagctgaaacaatagctgatggtctagtaaaccaaacactaccgttttttagctatttggcttccatttcttttaacaaaagagatttagttacgattg  
gaaataaattttttgtactctacatagctcttactcatttttaaaaattggaatccttaactcaaatgcaaaaattatgcttcgactctgtactcataatccaaactc  
attgtttttggatgcaatttcaatgactttgggtacaaatcgcgaaaatgctatcttctcaaatatgctattgagagaaaaagagtaaacctttcttaagaactaaa  
gttttcatcggaaataaaaaacctaagggccttaagtatactattcaaatcagtttattaatagaacgaatcacacttttaccactaaactataaccgctacatgtaa  
attctgatacaacgctacccttgcgaaggtagccattcagaaaagatgctaattccctcttagttaaagaacagagaagggttccctcacagtagcgggtgactt  
cgatcggggcctttcttacttctttttgttcagaattgaacaagaatttggggaagaaacatcttccccacttatcatgaaatcggccatagagaaagag  
gagatgtttttttattatcatagactttccctatggctgagagaacaataaacttaagaaaaagccacatagagccgaaggattactgatgaaagaag  
attctgaatgtctctgcttagtcgattctcctggttaacttttctctctctttccactcaattctagtttattagattctgtttaaagaatcaagaagatgaatagaact  
aagaacacacaaaaagagcatatagggccgagaccattaccaaaagttctcccaataatcatattgggtatctgttcccttctttctattagatggggcatgtt  
ggattttccatataccatcgaacctaaagggtccagaaccctctttttgctagtttccgaaacggaaaacctgaaccagagcagataaattctactgc  
ccgcttttacaagaaattggtgataaaactccactacagttgttcaaaatgcaccaatcagaatccttgagaatattcaagaccctatttctaaatatttcaaga  
gaagaggtacctgctgaaaatcgttcaacaaatccgcttaagaaaaattgcaaaatttgaactgaaggttttcaaggatgctgttaaaaattgttcaacctc  
tcacaaaaacagacaagaagtatactgaaaatataaccagccatagggatagaaagggcgcgaattcgttataccccaccaattagagaaataaaac  
ataaatggagaaagtttcatgataagatcagcaaatagaagaaaaagtcctaaattttcagaccgttctgagcatgtaaaagcfaatagcctaaagataaaaaac  
cctatacttgtgcaagtgataagagaaatgaaagatttctatttttctgattttctaaagattttttgaaactgacctgaatagacttatatactc gatatacag  
atataatgtacattatggagtagacctataatgggaaatgaaagtggtcaattttgaaattgaaataagccctttaaactcagtgtagagtaatgccatgtaaggc  
ataagtcacgttcaaatccgataaagggttttttacttagtgtagaataatgccggtgaagacgtgagtcagtggtcaaatccgatacagacttttctactaa  
attcattcatttctttttgaaaaatttcttttttattgaaattgatacttagtgcgagatgcatgatttttagtttaaacactaagcgaagcagggggtgtaaatc  
caaaaaagaaattgactcttttctattagatcaatcaatcactaccgtagtaactaatatagaatcccttttttataatctattctattccatctcttataaacg  
aatttcctaaaaagtaggggatgaccgtgaattaacctaacatcaactaaaaaaatcctcaaaaagcataatgaaaagtaggaagactcctgcttggatct  
agtatactctcagatattgacaattcaaaaaactgctcactatcattatagataatgaggagcgtgtgataaccgctctatcgtctagtagtcccctatcgtct  
agtgttcaggacatctctttcaaggaggcagcggggttcgactccctgggggttagggagattatgaaaggaggttaactatagattcaaaaacctag  
aataaattctctgggtc gatcccagtggttaattgggagggactgtaaatcgttgacaatagctacgctgttcaaatccagctcggccaaaaatctag  
gcttcgtgaataggttaaatcatttttttctccataaaaaagaatatttgatccatagaataaaaaaagataaaaaagaaagggaatatctttctaat  
ctatactcttctcctcttacaacaaaagaccttttctattggttattgaaaggtgattattatctatttttagc gataataaatcgcgacatactagttatgtcattct  
cactataccccatacagataggggtatgtagtatatgattcgtctatttcttagtagtaggacagcgaatattcttattcttaggttccattaaagaataagatgccc  
acggcccggggattgtatgtcaattggtcagagcaccgcctgtcaaggcgggaagctgcgggttcgagccccgtcagctccgaactagggttcaatgaaagg  
agaaattcatttcttttccatgaaaaaagggggaggaagcaagatcaaatcctatggggtacccttctacttttttagttcgcgtttctcagtaaaagaga  
ggagagtagaattttttactactctgtgttagtagcgaagacatacatatcagctggaaggatccctctatgttatactattccactcaacatgaatt  
gattgtagatccgatattcataatattgaattgattcagattatcagaatgcaagctctcccttgaatttacaggataccctttccctctccatgggattacatccgga  
gtattgcgaaaaaaagaggttatggaagtcaatattctgcattattgctactgactgttctactgttctactgccttttacttattattatgtaaaaacagtcagc  
caaatgatttaattgaaagttcaatattcattgaaagaatgaaaaagggattaaataaaaaataaatacctcaagcttaaatgaaaggatccggttgaatcataaagtg  
tgtagaaaaactacatatagtttttctaccacatttagagctttctattatattatctgaaatctacatagaatagattactagattgaaatagtagtcaattcaattct  
ttttcactgcatccactaaattcaatcaagtaaaaatgaaaaatccatggaggagagaaaaataatagagaatagactatagtaaaaagaaaaaagtaaaaagg  
aaaaaacagcgaatttctcatgcttaaacatgtcgcgaaatgttcaaaagagcataaaatttttaagaactaagaataaagaaaagagataaaaacaatgga  
atgtgcgatattggtgaaatagctccgcggaagaaaatctaaagtcttatgatagaactttttaccatgggtcgttcttagtagcattatgaattgctctaccgct  
ctttctatttctatttctatttctatttctatttctatttctatttctatttctatttctatttctatttctatttctatttctatttctatttctatttctatttct  
gagagaaagaataaagttcggcaaatgattaatgcaaacggtaaatgaaagaaaggttgatacaaacattcagactactcaatcaatgtagtagtccctagag  
ccactcctccccactactagtgaaagagaaaatgaaagactaccattaaagcagccaagcgagacttactatccatgtaaatgattctctatttctatgaa  
ggaattattctactattgatgaaataatcatagtagaatacaagggtacagagtaaaaaaggggttctgacctaaaggctatggatgaatcagttcaaaagaatttactttaa

caaattcttagagtattctggtagaattfaacaattcttagagtattctggtagaattggggagcattaagtataaatatgatacatagcccttcttattaataaaagaa  
taaggaaacgctatctatccctattggtagcgtttgggcccactactgctaaacaaaccccgattgaggaagaacgggtgggtctcaaatccagtatgccga  
gcctgttattctcttcccccaacttatgcgggggcaaatgtcgttggtagcagactataagcctaagtattttatgatcagggcaccagattggaactgggg  
ataaaaggattgagctccctgcctaccgctggccatgcccaaaaaatagatctaaaatcagaaaagagcaagtattccacgtttactactaaaactaac  
ttctttttatctaaacttaattctactactttttccaatcttttcaaaaatctattcatgctttttggatccagtttgattattctctcaagattctatctaaacacac  
attgctaactagaaaactccctttcttctattgaaatgaaaaaggagaaaagggttctagtacagaactcaaaaattaagaacaattggaaccattaactag  
aattctcttttttgaattcgggtattctctcccgcctgccaattaatggcataataaaagacaatggatttatgcctaaccgtatataaggtaaactccaggtccgaaca  
gcattattatctatggatcccccttatgacatattctgtggagaatcgttcttaatttttcattgcattaatatcttgataaaaaaaaaaagaattgactttgctatgtgga  
ggfccagaactagattggcatgacttaaaaaagtactacttttttaggattctacaacgaaactcttatattttatagaaaactctactactcaaacaaaaaa  
gaaccttcaaaacttttttgaattaaactaagcgtgctattctcaatcgaactaaagtcaaaacttctagtgcttataaattattatattttggtttatcccattcatagaaag  
gagaaaaaatgagaatctttgccgccaatcaagaatatacaaacctgaagtggcagaatttttcgaggtcttagaatgtttatcacttcttccattccattgg  
accctgggaaatcgaacttctgtgaaattgctctattcatatgtatgaatacatatataaaacatgataatggcagatttctgagatttctgagatttccattgg  
atatagattccaaatgctagatcgtctgtaggattgatgaaggtgagctgataatggaaattttctgataaacaggaaactaagattatgactccggaatg  
gaaatgaggggaatgccacaataccggatttagcagatcgaatcgaaggattttgtaggtcattaatcaaggctggcagaagaactgagaatttccacaat  
taaagatccagatcacgaaattcattcaattttgtcgaaggatacaattgctagaacctgataaaaagaaggatgctgtgatgaatcactcacctattctcc  
gaattatagatccgcccgaatattttggttcgatgtgcaaaagcaaacatttctattgaaacattctataatgaattcttaggaaccttataataaatggaat  
ataccgaattgtagcaatcaaatattgctaagctctggtatttactaccgctcgaatagaccataaaaggaatttctatcaccgggactataatcagattgggg  
aggagaatggaaatgaactatgataaaaaagaaaggatattggctcgcgtgagtagaaacaaaagatactattctagttcattcatcagctatgggttcaaatcta  
aaagaattctagataatgttccctaccctgaaattttctgtcttccctaatgctaaaggagaaaggattgagtcaaaagaaaaagactattttggaatttcaac  
aatttgcctgtgtagggtggggacctggtatttccgaaactcttatgtgaggaattcaaaaagaaatttttcaacaaaaatgtaattaggaaaggattggctgacgaaata  
tgaactgaaactgaaactctgatatacctcagaacagcaccttctgttaccgagatgtattggcctacggatcttggattggaatgaaattgaaacgggtata  
ctgacgatgacgatgaatcacttgaataaacgtattctgctggttggcgtctggttacagatcaattcggactggctctggtcgtttacaacatcggttcaa  
aaaactatccgtagagtattcagctcaatcaaaaccgactccacaacttggtaactcaactcaacctgattttataaactacttacgagaccttcttgta  
cataccttatctcaagtttgatcaaaccaatcattgacacaacggttcatggcgaaaagtgagttgttggctctggaggattgacggggagaactgcaa  
gttttcggagccgagatattccatccagtcactatggcgtatttgcctaatgacacgtccgaaggaaatcaacgttggactactggatctttatgctattcgcgaga  
attgatattggtgggattccgtagagatgccattttgaataatctgagaagcaaaagaaaaagagagacaggtgtttattatcacaataagatgagatgag  
tattatagatagcagcaggaatttctgcttgaatcgggtattcaggaagacaggtgttccagctagataccgtcaagaattctgactattgcatgggaaca  
gattcatgtagaagtattttctccaatattttctattggggctctctattcttttattgacataatgatgcgaatcagcttfaatgatttcaatagcagcgc  
aagcagttccgcttctcgtgcccagaaagtgactgttgaactgattggaacgcaaacagctctagattcaggggttctgtatagccgaacgcgagggaaag  
atatttctactaataatgcacaagatcctttatcaagtatgggaaagactataagatttctttagttaccatcggcgtctaacaaaataactttgatgccaaaaaac  
ctcgggtcccggggtaaatccatataaaagacaatatttagcggagggggctgctacggttgggggaactgcttttagaaaaaacgtattatgacttatt  
atgccatgggaaggttaacatgttgaagcgcagattatagcgaactgttggatatagggatattataacttctttcacatccgaaaaatgaaattcagacggata  
caacaaggcgaagctccgctgaaaaaatcaataaagaaataccacatctagaagaacttaccgcaatttgacagaaatggagttgtgaaattggggtcctg  
ggtagaaacagcggatatttttagtagttaaattacgcctcagatagcagcgaatcgtcctatatacgcggaagctggattattacgggccatatttggcttggagta  
tccacttcaaaaagaacttctcaaaactaccgataggtggaagagcgcgttatcgtgaaatggatccagaggatccctcagacataatggtcgtgtatat  
attttcaaaaacgcgaaatcaagtgggataaagtagccggaagacacgggaaataaggggatatttcaaaaattttgcctagggcaagatagccctatttgcg  
agatggaaacgcctgtgatggtttcaatcccttagagtagccctcccgaatgaatgtgggacaaaatattgaaagctcgtccggattagcaggggatcgtcaaa  
gaaactatagaatagcaccctttagatgagatagtagcaagagcctcaagaaaactgtgtttcagaattatagaagccagtaacaacaaaaaacctgtg  
ggtatttgaaccgagtagccgggaaaaagcagaatattgatggaagaacagggagaccctcgaacagcctgttcaatagggaaagtcctatctaaaataat  
tcatcaagttagagaaaaatccacggacgctcactggccctattcacttgttacacaacaacccgttagaggaagagcgaagcaggggacaaacgaatagg  
agaaatggaagtttggcctttagaaggttgggtctcattttacaagagatacttactataaatctgatcatctatagctcgcgaagaaatactaacgctacg  
atctgggaaaaacgagtacctaaccagggatcctccgaatctttcagtgcttctcagagaactacgatcttggctctagaactgaaccatttctgtattcag  
aagaacttccagggttaatagggaagaaggttgcgataaaatataaaacttcttatttcttattttatgattgaccaataaacaatacaaacacttcaaatggactcgt  
ttcccctcaacaataaaaggcttgggtaacaaaactacctaattggggaagctgttggcgaagtcacaaggccctcactttctattataaaaccgataaaccag  
aaaaagatggatttttgcgaaagaactttggaccataaaaagcagaatttggcttgggaaattctcagcggagcggagctgaaaacgaagcagaagattt  
gcaaaaaatcgggagtagaatttggattctcggatcagaagatcaaatgggatacatcaaacctcgcattgtcccgtgactcatgtgtgtatttaaaggctcttct  
agttatacgcgaatcttttagataaaaccccttaagaattggagggcctagtatatggcgatttctcttctgtagggcccagtctaaaaaaccaacttcttacgattac  
gaggtttattcaggatgaaattctatcctgtaaccatagcatttccccctttttctaccaggctttacaacattcgaatcgggaaattgcgacagagcaggtg  
ctattagagaacaattagcagatttggatttgcgaattatttagagaattcctcggtcgaatggaaggaaatagaagcagaggggtatagtgagatgaatgggaag  
atagaaaaagcagaataagaaaattttttagtagacgatcaattggcgaaacatttttcaacaatgtagaacagaatggatgttttgccttattaccag  
ttctctcccgaatfaagaccattgttataggtctgggataaagtagtgactcggatattatgaactttataagagagttatccgtcgaacaacaacttgccta  
tctataaaaaagagtgaattagcggcagcagatttagaatgtccaggaaaaattgtacaagaagccgtggatacaccttctgtagtggtgccggggcaac  
caacgagggatgacacaataaagtatacaaatcttctcagatgaattgaaagtaaaagggggaggtttcgcaaacctcgttgggaaacgggtcgaattactg  
ggcgcttctgcatgttggggctctcatttaccatcaatgtgggtacccttagagatagcaataaaagctttttcagctattttgaaattcgcgattaatcacgaaa  
cgtgctacttctaatgttaggttctaaaaggaaaatttggaaaaaggaaaccattgtagggaaatactcaagaaattagggggacactctgactgttgaaata  
gagcaccctaccctgatagattagcagcagccttccaaccactttagtagaggggcgactattgtttaccaccattagtgtaaaagtttcaatgcagacttt

gatgggatcaaatggctgtcatctacctttatccttgaagctcagggcgaagctcgttacttatgtttctcatatgaatctctatctcccgtattgggacatctat  
ttgctaccaaccaagacatgcttateggactttatgtattaacgaltggaaccgctcaggtattgtgcaaatagataatagttgaggaaactatccaaccaaa  
aagtaattacaataataataaactaagfatacgaagataaagaatctctttttctagttcctatgatgcactgggagcttatagacagaacaatctgtttagacag  
tccctgtggctccgatgaaactagatcaacgcgtcattgggttaagagaagttccgattgaagtcaaatgaatctttgggacttatctgagatttatgccact  
atctagtagtgggaaatagaaaaaggaaatccgttctatatacattcgaccactcttggcattttctttatagagaaatagaggaaaccatacaggatttagtc  
aggcctatcatacactatcaacaaggaaagttagattcggggatgccctttcagggggcattccgatttcgctagatcatcattttccgcacgaatccagattg  
agattgaggaaaggaaagtaactaagtttcgaatcactgactcagccattgtcgaatcctactcagcaattgtcgaattatactcagccgaaaaagggggactta  
ttatggcggaaaggcccaatctgtgctttcagaataaagagatagatggaactgctatgaaacgacttattagcagattaatagatcattcggaaatgggatafacat  
cccatatactggatcaataaaaacgctgggcttccatcaagccactactacatcgatttcattaggaatcgaggatctttaaacaatacccttaagggatggttagtc  
caagatcggaacaacagagttttcttttggaaaaactattattatggggctgtacacggctagaaaaattacccaatccggttgaatctgtatgctacaagtg  
aatatttgaaacacgaaatgaattcgaattttcggataacagatccttcaatccagtctatctaatgctttttcaggagctagaggaaatgcatcgaggtacaccaat  
tagtaggtatcgaggattaatggcggatcccaaggacaatgattgattacattcaaaagcaatttacggaggactttctttgacagaatataatctctgct  
acggagcccgaagggggttagafactgctgtacgaaccggcggatgctggatctfacacgtagactgttgaagtgtcaacatattatgtgctgtagaagag  
attgttgactatccaagctattctgtgagctcctaaaatgggatgacggaaaaactttttgacaaacatattggtcgtgtattagcaaacgataatataatcgttca  
cgggtcattgccactgaaatcaagatattggaattgggttagcaatcgattcataaccactttcagcacagccatttcgagcaaccaatataatagaaacc  
cctttactggcggagcacatctggatctgtcaattatgtttatgctggagttccactatggcgtatctgtcgaattgggggaagctgtaggtgttattcgggtca  
tctattggggagccaggactcaactaactaagaacttttcaactggtgggtattcacagggggtactgccgactttgtacgatcccttcaaatggaaaaac  
caatcaattgggatttggaccacacgtaccgtcattggcagcctgctttctatgttatagacttgcataactatcagatcaggtcagatttctacatagtg  
tgaatttcttcaaaaagcgttattctagtgcaaaatgcaaatatgtagaattcgaacaagtattcgggagattcgtccggaacgtccgctttgattttaaagaa  
aaggatcaaaaacatattttccgaatcagatggggaatgcactggagtagcctgattttatcagcggcgaatcaaatgtaattcttctgctgattaccaaaaa  
caagccatttagatattgtcagtaagtagtgcagatctagtagcttcttttctccacaagatcaaatgaatacttattctttctgttgacggagg  
tatatctttggcctcctgatgctgatgaggttaagacatagactgttggatcttttggtaaaaaagataggaaattctgatttcaacgccgctcgaatcag  
tccaatgctcattggaattttgtctatccttctattctcaaaaattttgattgttagcgaaaaagcgaagaaataggttcgccattccattacagatcatcaagaaca  
gagaagaaccaatctctgtttggatttcgattgaaataccctttatgggtgtttacgtagaactatagttgcttattttgacgaccacgatacaaaaaagata  
aaaagggttcaggaaattgtaaaattagatagaccctagaggacgaatataggactcagagagaaagactcagagaacgaatacgggagcccagaaaaagaa  
tataggaccgagaggaaatgtaaaacctagaagacgaatataggactcagagaggagatgaaacctagaagatgaataggatccagagaac  
aatatgaaacctagaagatgaataggaatcctagaggacgaatataggactcagagagggaatccgagacgaataggagtcagagaacaaataggg  
ccccgagaggataaatatgctcatttagaggaaactcagaggacgaatcgggacttttagaggaaactcagaggaaactcagaggacgaatagggaacc  
gggaggaagattccgtcttaaaaaagggggtttgattgagcattcaggaacaaaagaatttagtctaaaaatacaaaaagaagtagatcgtttttttcatttccaa  
gaactgcataatctgccgagatcctatccctaaaggtagacttgacaatagattattggagtgatcacaaactcaaaaaatacaagaagtcggctgggtggattg  
gttcgagtgaagagaaaaaaagccatacggaaactaaaatctttctggagatattcatttctgaaaggcggataagatattagttgagatttgataccactag  
aaagagaaaaaaagattcgaaggaaatcaaaaaaagggaaatgggtctatgttcagtggaaaaaattctcaagagcaaggaaaagtattttgtttggtcga  
cctgcagtcgctgatgaaatgaacgaaggagaaatttagcaaacctttccacagatctctcaggaagagggtaatctcaacttcgacttgcattttatttc  
tcatgaaaatagcaagtttaactcaagaattatcatacgaatagcaattcgttcgaacttgccttagtattgaaatgggaacaagaagaaaaagagggtcgtgct  
tccctgttgagataagcaaatggctcattcgcatttctaaagaattgggttaatacaatccactatttctatacagaaaaaggtatgatacagaagtcgagg  
actgattctcctaataaggttagatcgcaccaatacaatccttttattccaaggcgaagattcaatcacttagccaacatcaagaagctattgtacctgtgaaatg  
aaataagaatacaatctttgatggtttgtcggcaatcactgttctcgaattgggttttaagaattcaaaaaatccaatggggtaaaagaatcgaatcctagaat  
cctattcctaaatgtttgggctctttcgaattttcgggactcttaggtactattgcacatgataatgaaatcttctactatttactaacgtataatcagatcctg  
gtaaaaaagcatttctcctgacaaattgaaacaaaactcaaaacttcaaggacttcaaacactttaaataatgaaatacaaaagacttcaaatcgtatgtaac  
atcattgttgatcattccagttaaattggcactttctccctcattccttgggaagagacatcagcaaaaatcacttggacaatattttcgaatattttcgaatatt  
aatcgcacataaaaaatcaggcaaatcttctattgtaaatatagattcctttgttaaaagcagactagtagacataacgcaaggcttccaaaagtagaacaacttcgaag  
atggagaaatccttcaaaaagggttaggttagttacgtttatatacgaaaaagcagactagtagacataacgcaaggcttccaaaagtagaacaacttcgaag  
cgcgttcaattgattcactatcggcaatcgaagggagaattgggattggaatgagcgtataccaagaattcttgggggtccttggggtattcttgattggagctga  
gttaaccatagcccaagtcgtatcctttgttaataagatccaaaagggtttatcgaatccaaagggtacagatccataatagacatatagagattattatagccaag  
taacatcaaaaagtcgggtttccgaagatggaatgtctaatgtttttcactggggaatattggactattgcgagcagagcagcagggcggcctttggatgaat  
cgatctattatcgggcaatcttattgggaataacaagggtttccctgaatacccaagttctatctgaaagcaagttttcaagaactgctcagttttagcaaaagctg  
ccttacgaggctgattgattgttgaaggcctgaaagaaaactgatttctggggggattatcctgttgggtaccggatccaaaaattgtgcaccgttaccaca  
agacaagaactttatttcaaatcaaaaaaaactatttgcgtcggaaatgagagatatttttctccatacagaattgttctctgattctgacgtaacaaca  
atttctatgacatcagaatcaccattfaccctttatgatttaaggatacaaaagcagatttttactttaaactagattttgacctagaacgtaagaggttaga  
ttttctattttattttaaataaaaagatttagtaattcattaaaggttatgctfataccatgtagaagggttccatcggaaacattattattttcaagctatttccgctcttc  
ttaatcttcaaaaagaaagaaatttctgtaattgaaaggtagatgaaaaaaaagaaaaatcaaaaggaggtggaaaaaatgacaagaagatattgaaacatca  
atttgaagagatgatagaagcgggagttcattttgtcattgattatgtaataaaaaggtttcagtgtagttaaacaagttggtcattactaaaactagactttctcaatttaga  
gacttaagagcagaagaaaagattggaataatccaccatctcccaaaaagagatgtggcaatctgaaagaaaaattctactcttcaagatattcggcggga  
tcaaatatagcagaggttgcctgacattgtatcgtcctcgtacgcaaaaagatatactctcgggaatgtgccattttgggattcctactatttttagccg



atacaaatgtgaccgatctcgcgaatatacgaatccagccaacgatgacactgactcaatcgaatgattcttaacaaatagatttgcatttggaggcc  
gttctctatataagaatcattgattaagaagaatagtaattctgggcaactgcgtagatttggaaactactacttctttttgtttgcatagaaaaagacggg  
gaatattgatatatagagggtattgatatattatcatctgatgtattctgatacctaataataagattaactcactgctgagttgagaaaaagatggtga  
atcaaaagaattctttttgaagtctttttatcaggggacaatagaaatataaccgttccataaaactcaagggttatac gatatacggcgtagaagta  
ggccaactcttattggcaaatagagggttccaaatcatgccaaactactacacttctgggctgtaactactcttctgtaggttcatagctgttcgaa  
tccacaaccatccaaccgatggtcagaattctcgaatataccttgagtttctgagacttaagcaaaactcagattggagaagaatcagtccttgggttcc  
ttattggaactatgttcttttttttttgaactggtcgggtgctctttaccttggaaaatatacagttacccatggagaattagcagcggccacgaatgataa  
atactactgttgccttagcttactcagtcagcggcatattttatgagggtctagcaaaaaaggattgagttattcgaagaatataaaccactcaatctttac  
caattaacatattagaagattcacaaccattatcgcttagtttgcacttccgggaatatttggcgatgaattagcgttgttcttcttttagtcccttagta  
gttctatacgggtcattgttcttggattattacaagcggtattcaagcttatttttgaacgttagccgagcctatagtgaaatccaggagggtcattgaat  
tgactagtttcaaaatagcttttttagcttaactcaatcatgcatggttgcgaaaaatcgttggttgaaaaacaaatagttagaattgcgtatgaatatacaatc  
agagttgtagaagagagaataggctatattacggaattgccaacaagatataaggcattagggaggggcgagtcaggctagatctatactttatgctataag  
ttcagtcattctttgtatgggttccacttaaggaatttttgaatccgattcaatagaaaatagaaaaatacacaacaaatagaagaacaaatgataggat  
tatatactccaaagttagattcattatcaatccgatataatggaatccatcaatcagtcagcatattgtatcaattggatcttgaatcttattggtat  
ctggattaggtcgaattccataggggttctcttatttaccctttattatgaatagataggggaaaaatagaactcaaggatagcgaaggagaagaaga  
aggatggaatgaaagatcagttggttggaaagaaagagaatagaataatgtagacacaacctctaatgattagaactaaaaaggagatctcgaagcagttcgg  
agaattcagattatcttcaattgtacttttagtactctgccaatagagcttgaatattcttgggttattgtatcttaaccattctttttttgacacgagga  
actcatcagaatccactaattgctgctcctcgttattgctgctgattggcctgtaggtcttctcttattgggctggagttggtcaaggtactgctcaggaaga  
ctgtagaaggtattgcgagacagccagaagcagaaggtaaaatcagcgtactttattgcttagcttagcttagctttttatggagccttaacaaatattggactagttgtgcca  
ctggcctttatttgcgaaccttttgaatccttaaaaaagaaaacgagtccttttagattagactttcttcttttttagtaaatggatttcttctgcaattccaat  
atacaactttactcctaatttattactcctagagtttctatttggggacagacaataccccaccaggaaatagctgattgggatgatcaatttagaggatattg  
gccgtcttctccgcccttttttagggcagtggaagtttttcttttttaggaatttgggaacattcaacaaaggaggtcttcacaggtcaaacgagatct  
aagacttaactcaaaagaatfactaaatgaatctatttcttaaaaaaattgcataaaaaaccgatcaaaaaggcgcagcgaagtaagtatcgaacaaactttg  
ttctttgtctctatataagaggagcagatagaaaatgtaaccattcttcttttttagctactggccatccgctgggagttcgggcttaataaccgatattt  
agcaacaaatcaataaactaactgtagtgggtggtgattgatttttggaaaggagtggtgaggttctattcaagaatagattggatctatccggctgcac  
ttagaatatttttagattttcgaataataagaaaagggtgcacgatctcgaactactctgaataaatgcaaaatcatatgaagaaccatagcatttcgga  
cctattgtaaatcaaatcaattgattctctatagaccaataatagaccattaacacggftaaagctaaactgcttgaagttagcgaacaaagggtgactcttct  
acaactatattagatttagtaccaaatgctttaaacaggaatagctaatgtagaatattatctgatatagaacactatatac gataaaatggttgaactatttagaag  
gggcccctgcccctttttatccaatgccaatcagacacattgataaaaaaggagaaagttttggattgaaagaaaaagtaggaattctatccatttctttcca  
ttttctatttagtttctaatgaaatgaaattttaactaaaggcgaatacaataaaaaaacactttgctgccacgatagattttatctagcggcgaagagtcctc  
taataattatctagcttataatgggttcggtatattgaaatataaacagaaaagagaggtagaggatagcctatfaccataaaaaaatggaagttagccatagca  
aaaaagaaaaaggagcgtgagagccaaatgaatcgaagattcatgttgggtcgggaagagatcaaaaagttgtaaacctaaatagcaagtaactactctc  
attaaaagatttagataatcgaacacagagatcttgactattcgaatcggagaattgcgtagaggaaccattgagcagctcgaacaaagctcgaattc  
attagaaaagctcaaaaacgaacccctttatttgaacaaagggcagatgaatcaggtccgacaacgggtttccaacaagccgtacaaggagcttaggaactc  
tgaatagttgttgaataccgattacatttccgtacgatcgtgctaatttagcattctcgggcccagatggaagaatgtaaaatattagccttgaactctacttt  
cctttagaatttagcattattttcccctgcttccgaaaaaaaatagtaaaagaactaatggcaacctcagtcgacgaatcataaaatctccgcgaac  
gtattgaacaatataatagaagaatagggattgagaatatacggctcgtatgctcaagtgggggatgggattgctgtattataggtcttggtaataatgctcagcc  
aattagtcgaatttgcggaaggactaggggtattgctctgaatttgaatccaaaaatgttgggattgattaatggcgatgggtttagatacaagaggcagttt  
tgtaaaagcaacaggaagaattgctcagataccgtgagcgaagcctacttgggtcgtgtataaatgctctggctaaacctattgatggagagcgaatgtag  
cttcggaatctcgttaattgaatcctcctcctcgggtataatccagcgttctgtatgaacccctcaaacgggcttattgctatcgaattcattcctattggg  
cgctgacgcgaggttaatttgggacagacaaaccggcaaacacagcagtagctacagatacaattcctcaatcaaaaaggcgaagatgtaaatggttttagt  
agctatcgggtcaagagcagcctccgtagctcaagtagtaactcttccatgaagaggggccatggaatacactattgtagtagctgaaatggcggattccctg  
ctacattacaatactcgtccttatacgggagcagccctgctgagtttttagtaccggcaacggcatacttaataatttagatctctccaaacaggcaca  
gcttaccgaatgctccttctatfaagaagacccccggcgcgaagcctaccaggggatgtttttatttgcattcagcccttttagaagagccgctaaatfaa  
ttcttttaggggaaggaatgactgctttaccaatagttgagactcaatcggagacgttccgcctatattcctactaatgtaatctccattacagatggacaata  
ttcttaccgcagatctattcaatgccgaattcggcctgctattaatgtgggtatttccgtttccagagtaggatccggcctcaaatfaagccatgaaacaagtac  
tggcaaatcaaatggaattagctaatcgcagagttacaagccttgcacaatcgcctctgctctcgataaaacaagtcagaatcaattggcaaggggccgacg  
attacgagaattgcttaacaatccaagcaaatcctctccagtggaagagcagatagctactattatcggaaacagaggatattgattccttagaattggac  
aggtaaaagaattctgtagattacgtaaacctaaaagactaaacctcaatccaagaatattatctctagcaagacattcaccgaggaagcggaaatcct  
ttgaaaggagctattcaggaacactcgaacgggttccctcaggaacaacataaatttgcacgtctactctttagtagaagtagtagaggagaatcgttgg  
aaagattttcattgaaatcagcaaaaaagtttcttagtttttagtatgatttttaagaatagatagaataagattgctccaatagatttgaacctatacaaaaggt  
tagaagacctctgctatccattagacaatggagcgtttttcattttcttctttcttcttcttcttcttcttcttcttcttcttcttcttcttcttcttctt  
agaaaaacaaatgcatatacaaatgatgatcatatatacaagaaggaatattggagcgggtagtggaatcgaaccgcgaaccacgggttagcctgtc  
agctacaaactgttctatctgttaaacataagagaggggaactagtgataaaaaaggggggtgaaatcggccctctaccatctatatacaaaatagaatgcca  
atacagaatgtaaaaggggctcttctacgatcatcaattccagaatccatacaaaatcgaagggattttatcttaccactggatcttggcaccggtaacaa

acatgcataaacctttctcgaagtatgtgtccggatagcccaagctctcgatgtagctctaggtctccgggtcaaaaaaacacgtcgatgaaggcgtgctgggtc  
actattactgtggcagggtgcaattttctcgcattttcgttttctactcaaacctcaagggtaaccttctctctatctttttttgaagatcgacgaatcaaatgataatt  
ctgttctaatttctgccgtctctctctctgaatcaaaccttttttccataatgtgccgttctactactaccaagtatacgggtcctaatcctagatgaaaaataaata  
gaaaaaagaatctaagaaggcggatctccccctccatcaagagtaataaactagtgctgatacagtaacaaaftaactaaftaaccaactgctgatgtt  
gaggcaatcaagaaaaggcgaatgataatataaccacgaaaaagtgagctaatcccacatcttcttgcacaatggaagagccacgggcttatctctcc  
agcgaattaaatagccaagggtgctcgtcatgagcccatgctaaagtctcaattaatctgccaatattccacgccaggaatfaagaacataaatccagtcgcc  
aaacaagatgtccaaataagaacatccacgccccataccgataaaccttcatcccaaaaggatfatatccattgataagttgtgaaggttaaccataggtatctct  
aacatccccataaataagtgagggttcattaaattgtgaaacgttgcctgcccataatgtgatgtgtttccaatgccaataaaaaagtaaccatccaatgtatttaa  
catccgaaaaactgccaataaaaacgcgtcccaagcagaataatcacaagtaccgccgcgaccaggccgtcgaaggaaaactatatccaaaacttttttatcc  
ggcattaatttggaaaccgcgtcatctaaagcacctttactaaatcaatgtagttgatgcaaacctaaagcaatagcatgatgaaccaagaatctccaggctcta  
ttgftaagaaaagcgaattactattctcgttaacagcattcaaccatccgggtaaccataggggtcaccgcattgaaagcgggaccgctcgttgaagataagagta  
tatgaaccatgatgtcgttaccatgagccgattgatccattgagcaaataggttcgatcaagattgcttttctgagatcacaaggaagcatgacgtcattat  
gaacataaaaggcccaaggtatggaatcttaggaagagactagcccaactaaatgagatagatagcttctttatggtctaactcttgccaatacattatcctcattct  
gttccggattgtaattctctaatgaaaaaatagtccatgagcaaaagccctgtcatgatgaacctgcaatgtattggtgatgatatataaagctgcttgatgta  
aagtctgtgctatgaatgataaaggttaagagtagacatattgtagctactaaggagtaataaccctaaagaaagctagagcaagacctaatgaaatgaatc  
gaattattgattggtgtaaaaggcccttatgccacgcccataatcgaacccccggaggagtagtgcttctaaaagactttgatactgtgccaaftccgaagttagt  
tcgatacatatgaccggcaatgagaaaaataatgcaatagctaaatgatgatgagcaaatatcggcagccacaacactttgtgtttggtggaatcccccaagaa  
ccctgtgagtagggtaatacatctaaagaatattccatgcaactctccccgtgatgctggaatagcgacatgaactaaatgtcctgccaagcgaagaaactta  
ccccgaaaaagtcctgacaatgatgattgagacgagattccgctgttttgaaccacgaaaaggcttgggttccatttgggtttagatgtaaccaacccttataagga  
tagggtagaaaagaataatgaaaaagagctcctgtataaagcttctcattggtccgtaatccaattgtataccaccactgataacccccagaatagcgatattcact  
ggaccgcccggcctcctcagtaaaaggcttcacagcgggttgacaaaatgaggatcccaatcgatgagcaataggtcttacgtgtaaaggatcctgtatc  
catgatcaaaaftccttgcacaagcgacatgaacagatttccggacgtccatagaaagattattgctaattgccaaaagtgaagcaaaaatgttctgataaagac  
gttctcagtaatatcatcatgactttcgaatcatgtcggtagcaataccaaaacacacagacgagtagtgggtcctgagctaagccttgctaaacctgggaa  
atcttaattccataatgctttcaaacctcctagccactatcctactgcaataattctgctaagaagaatgcccatgttggcaattccaccagaagtaattgggt  
actcctacgacgctctgtataatgctcaaggctctaggtgagtagcagggcaacttttaattttatgagcccaacgatagattcaatcagttcttgcacaata  
accacggccgtgaataaaaactaaactgaaggccccagacaaaatgagcactaaagaaaaagaccatagcggataatgaagaaccataagactgaatta  
cttgggatgctgtgccacaagaaatctggagccaccattatcgaatggaactctgtcaaaagtccccctgtgatagattaccacccttgatcacttata  
gtacccccaaacatccgactcatttccactgaatggaatgactaccgaaatggaattgacatcagaatagacctaagaaaacatgatccaggcgagatac  
ttgacatgttccccctgccagggccatcgcaagggaagcgaaaaacgaatttctttatcgggtatcaaacgggaactcgagcgaataaaacaccttcaaaa  
agtattaatacagtcacatggattgaaatgctggaatgtgatgactaaaaatctgcggctcctaatggaataggtacaagaacactttgccctactgctacta  
actcggccactccccacgttaagctggtacttgttgcaccaggagctgttacgtaggcgcgaccagatggagattttgaccattgagcaaaagatcggttga  
attgatgcggtatccgaaaacatatttggggacgacctaaagcactcatggtatcattgaatgataaaccaaaactgtgaaaacctgaaatatacacaacca  
gttaaggtgggatgattgcatcacggtgtctaaggacacgatctaataagatcgttgcacgagcgttggatcatagctcttaccataaaaatggctgatgtgcag  
cagccaactattagaatccgcaatccacatgtggtgtggaacaaggaaagttgtgacatagtcagtagctaggtatggataggggggcatagagtacat  
atgatgagctacaacatgggttagagcctagcatagctaggttaagagataatgacatgccatgacgttgitagattcatagagacctttatggcctgtcctg  
taaattggcctttatgagcctcaaaaatactttcaggccatgaccaataccacggttgcctatacatagactgcgatcaggaaaaagataagcaatagctaaatg  
atgtgctgcaatcgtcaaccatagaccgcccgttattggtatgacctccgcgaaaactaaagaatctgctattttggaccaattcaagtgaaaaagggg  
ttgctcttcggcaaaactagataaaagttgagcaaaaaggtcgcgattcaaaaatcataggaaggtgatatccttaggatcaacccccgcgtcaagaaatt  
ggttaactgtaaaagatacagatttgggtgccccgccaagaagagacccaagtcctaataacctgctaagtgatgattcaacatggattctacgtcttggaaac  
aggctaatttggagcggctttgtgataatggaaccaccagcaaaaagcattaacgatgcaaaaatcaatgaccgattcggtaacaatagattgtaattcacta  
gttattccggatgctcgaacatctgaaaaaacccggaggttatttggattcctcggaaaacccccgctacatcaccattcaatatttctgacctagattggcaaac  
tacctgagcactgggtccaatgtgagtagatcacttagccatgctcataaattgaaaaacgggcaccatggaaatgacatgacctcaacaaaagaaagataatg  
gagattgaccgaaatgagcactaaagactttcagagatctcctcaaacctgtatgactatcgaatcgtgacatcagcatgtaggtccagatccaagtg  
gtagatcagggcccttagctattgttctgagaaatggccggcttggccattctcaaaaagatttttacagatccctatccacaacatftttacttctggttccg  
gcgaacgaatcatcattaagctcctcttccggacaagacatacaaaagacccgccaacttttagtaacctttgaaagatagatattatgattatcctttcttta  
ctatctaccgtccttctatttttttagttatcactggagcaattatataatgaagtaactctgaggcaaggttctggatctattatgacataagattgggtgcctaaccgga  
cttttttatcttggatttctccacgtaacaaaaaaccttttttaattttaaaagctagctatfttttttaagagataagctcctatctatctactttcttgagcataatata  
gattttttatctgattccaaattccaagataactcattagaattataaagaatggtcctgatataatgcaatatttataatgccctttttatctgctttacttctattctag  
accctatcttattcttataaataataataaagaaggcagagaaaagagataatgaaattctgattcgtatccgacctaatfttttattgattatggatcaac  
aaccaaacccccatttttcaaaaaggagagtgcttattcaaatcaaacgctctgtaacttcaaccagttctgctctcaataaattcccggagtaagcgtat  
agctgtttccaatactcagcagctgatcaaaccaagcttctgcaattctgaatcaccctgtagaatggcctgttctccccggcgaataggtatgcttcccctag  
aacctacttgagagtttctacctacatcggctcagaaattgctatcttaatttccctgtcttaactgaattcatttctcaaaaatcgaatcaatttcttgggttacgc  
agaagaagtaattacctaagttcaaacctaaatttgatcaataatcagttgatcttttccccacctgcagaaaaatgaagcatagatagactatcttcttccg  
gaatttctgaaaggtaactatctcgtttcatatataaatttctataaacttgaaaaagacttttccccataagcaagaaaaaagaacttactatcttgggtactg  
atactacaccgctgcttaacctttagtgatcggtcttattacataagcggtaccataaatttccccatcatcggataagtaagcagtttttttagttgatcgcacc



ataacagcctctggttaggtgggcaaccggcaagtagacgtccacaggaattaactatcaactccccgaacagtactataggaatccgtactgaacattccacc  
agtaatagtacaagctccatagcaatgacgtatfttgggtcaggcattgctcatataatctcactaaaggaggccatttccattgactgtaccggctgttaaaatt  
aggctccgttgcctagactgatctggtaacatccataacgatcaaatgcaatcgtgagcctataatgaagcaaatcaatgaaacaacaactggfaccatata  
gaaggggccaataactagagacttggaccaatcgaagatcttttagtgtagtgaaataacggaattggaactgtttggtcagtaggggaaactcaatcaact  
cataactgtctaatggaatctttctcttttttttttttctgtgaatattcagttaagaccatccaaggctcttttccatgcataaactaaaccaactagataag  
cacgaaatgaaagctcgtataaaaacggatatacccaatagcgaactcattgcccgaaggtagaagaaaccgtttccacatcaaaaacacaaaaactag  
cgcaaacatgtaatagcgtatcgggaattgtaaccaagccccccatgggtctatacccgaatcataactagaagactctctctgctctcacgaaccggagctaa  
aagtgcgaaatccaaaatgtaaaaatggaataagcgttctattattagaatgcccataaaaatcatattcgtgaagcagaacataaatgactcccattaatgt  
ggaataggcggaactgaattagcaatcagcagcattgcaattatagcaatftctctcttctcgggtgaacaaggatcgggttttctcaaccaaggcgt  
agtttagccttggttctcttggccagctctttaaagattcaatcaatggaatcccgaactcccttcttttatttcttcttatttaggtatgggtggagacataattctat  
agaacaaaactctctcgttccatttgtctatttcttagaatcttagaaaaaggaaataaaacgaaaatactacgaattagagccataaataagatagatgactaa  
tgtatgcagcctaagtaggagtaattctataaaaaaaagaaacttattcagaacgtagattgatttagatgataagcaagtaataact  
caaaaagtaggaattgcaagatggagaacatcttgcagttgattgatagaattcattttctctgtctataatfttctgatgaatgagcctctgtaactctttt  
atctctattttagggcgagcgcctgtccagctataaaacaagtactaatagggaaatgaaaactataactaaaggaaactgagatactctctaaaactcaaaaa  
ggacataataggctatacggattcgaaccgtagaccctctcggtaaaacagatcaaacggattattatcgaatgattcgaactgtttcaaaaccacaatcatttt  
ttgcttgggtcttttcaactgataaaagatcagtttagtccaccatagttttctttacggaaagataatgagatggctccctgcgctctgattgattttgtattatg  
atctatcaagagcaatacaaaagtgttcaaaaggaggattacctgacttagctcctccggcctaataaactaacctaaagtgaatagagctctatcgttccg  
ctacaagagttgacttagactcatacacttaaaagttcatagaaacgaaaagaatttttggagcccttactccttaaaagcctagcatttagtggcgtgataatfa  
cctatacaactagcaaatcaataaaggttctattgtttaggcactggattggtacctgaatcggactgaaccaactattgtcaggcgactgttctctattctctgaa  
tccatgaagtaagacattgatttgcagaagatccactatgttctgataataagctcccttgaaaaagcattggcgcactgtaaacgagttgctctaccgaactga  
gctatagccctgtcagagatcttaatatatagaaatttctgtcaagatgaatattcttaatagtagaggatccttctgtctgttactataataacatacaataa  
cgaagcgggtatttctataaaaaggattcgtatataatcgaatgaaagggtcttcttgggtgataaattgcctactaactcagtggttagagattgcttca  
tacggcgggagtcattggtcaaatccaatagtaggttaggtgagaaaaactagatagcattggcctactcgttctgctatcaataatttttctaccctctt  
cccttttcttctatcaactaaaccgttgggttcttcaatagtagggggaatcaatcaaacgcctcgaactctctctgctctgagactaccttctgctcaaa  
ccaatttcttctgaccctcagctctactcagttagcttggctatttcaagtcctgttgagcttctccggatcaatgctactaccagttccgactatttctaaatg  
atgactcattataactattctggcaaacgcctccacagaaccgcgtaaccattgatcgttgaggagggcgtatttcaagggaccatactacagctgtgtaat  
gggggctgtgttgtaatacggcaatttggcactatttagataaaatgatttcttctcactcaaatcccaataaattcgttagagtgactacataaaagattaat  
ttcatttctcaattgttctctcttcttaagttatagcttctgtgtagctctcagatgttaccaccaataaaaagcctgttccggtagggcgtcaattctccgaaa  
ggattagttgaaatcccctaattgttctgcaagcaacatacttcccggagaaccggtaaaaacttctgcccacaaaaaacggttggataaagaagcgtcaattt  
tctgtctctgctacagttaaacgatccctcctcgataatcaccacccaagaattgcgataatgctcctgaagttcttgaacgttgaagtttcttaactctttcg  
cagtttcaatgttccgcaacgatccgaggttgaacatagttgaggttgaatcaaaaggatcactgcaaggataaatcccttggaaagtaactccttggaaag  
acggtagtagcatccaatgtgcaaatgtttagcagggagcagggtcggtaaacgtcccgaggtacataaacgcttggatcgaagttatagatcccttttagta  
gaagtaattcttctgcaaaagaccatttctgactaagagtaggttgataaccactgcagaggcatttccctaataaggcagataactccgatcctgcttgaac  
aaaacgaagatattatcgtatgaatgaagcagcttcttattcaatctcggaaatatttccatagttaggcagtcacaaccaactctcactacgagctccgttc  
ggttcaatcatttggccatagactagactacatttgaatttctcaatatttctcaatatttccagattccttcaataaaagatcatttctcactacgagctccgttc  
cctactccgcaaaactagggatagcctttagcaatattgttgaatattcctgatgagtagctgtttactactccagctcccccaaatagtcgatttct  
ctccacgccgataaggagctaaaagatcgaccacttaataaccagtttcaaaatggataattctgatctaactcgaataaggcggcgcgatctatgaatagg  
aatgttgcactagatctacaggaccaaattgtcaacaggtccccaaagcgttgaatcgtccaaagtagtctcaccgacaggaactgagaggagctc  
ccgtgcaatcacttccatctctcatcaaccatctgtgactcagtagctcactcatttccatcaataattgttgaactcacaagttacattaatttctt  
accgtcagtgctcgaacttactacaaagcattataatataaggttaacttccccgggggaaaagtgacatccagcaggggtccaataatttctgatacggccc  
tctacttttctcaattgtagaacccccgggacgagaagtagtaggttctcctaataatcacaataatfttcaaaaaaaaggaatttctgaaatttctgatttttct  
tgttgaataatgcaaacacacaaaaaatcaaaaatcaaaagtcaaaaggaatgaatgaatgaatgaatgaatgaatgaatgaatgaatgaatgaatgaatgaat  
cgttccccaaacgaatccccatcaatcttactcatggaatgagtcggaaagtcaatcaatcttttctatatacatatttgccttttgaataacgatttgcctactc  
tacttctatctagactcgtatataaaaatatactactgtgaagcatagattgctgtcaacagagaattttctagtagtatttaggtatttccactcaaaaataagaaaag  
ggggtcttaagaactaataaggattagaagttgatttggggttgcctatatttataaagagatatacaataaagatgatttggtaacaaatccatggttataaa  
cgaagcatgtaactaccataaacaactcaattcttatgaattctctatagtagaattctctatagcatagaattgacacagggtgtaccattatataatgaaac  
atattatagatgaacataatcaactaagcatgcccccttctttaaagattgattgataatgaatgaatgaatgaatgaatgaatgaatgaatgaatgaatgaat  
tccatctagtagaccctgtctgtgagaatcttaattcatgattttagggaggacgtatgaccacaacagaaactaaagcaaggttggatttaaagctg  
gttgaagattataaattgacttactacccccggagtagcaaacaggacactgatcttggcagcattccgagtaactcctcagccgggggttccgccgaa  
gaagcaggggctcagtagctgccaatcttctactgtacatggacaactgttggactgatggacttaccagcttctgacgttacaagggcagatctacacac  
gagcccgttggggagataatcaatatactgcttattagcttaccattagaccatttgaagagggttctgttactaactgttacttccattgtgggtaacgtatt  
ggttcaaaagccctacgcctctacgtctggaggatctcgaattccccctacttattcaaaaacttccaaggtccgctcatggtatccaagttgaaggataagt  
tgaacaaatcggctgtccttattgggatgactatfaaaccaaaatgggattatctcgaaaaattatgtagagcatgttatgaggtctacgggtgacttgatt  
taccaaagatgatgaaacgtaaacacacaccattatgcgttggaggaccgttcttcttcttggccgaagctattataaacacaggccgaaaccgtgaaatt  
aaggggcattacttgaatgcgactgcaggtacatcgcaagaatgattaaaagagctgtatttgcgagggaattagggttccattgtaatgcatgactactaac  
gggggattcaccgcaatactagtttgcctatttggccgcacaacggcctacttctcacattcaccgagcaatgcatgagttattgatagacagaaaaatcatg

gtatgcaattccgtgtattagctaaagcattgcgfatgctgggggagatcatatccacgctggtacagtagtagtaagttagaagggggaacgcgaaatgactttag  
gtttgtgatttattgcgcgatgatttattgaaaaagatcgtgctcgcggatcttttactcaggactgggtatccatgccaggtgtataccgggtgctcaggggg  
tattcatgtttgcatatgccagctctgaccgaaatcttggagatgattctgtattgcaatttgggtgaggaacttttagacatccttgggtaatgcacctggtgcgc  
agctaadcgggtgctttagaagcctgtgtacaagctcgtaacgaaggcgcgatcttctcgtgaaagtaataaaatccgatcagcttgcacaaatggagctctg  
aactagccgcagcttgaataatggaaagcgcgacaaatcgaatcgaagcggtagataaactagatagctagactaagtgtataaaatagataaaaaaggt  
ctaataaaaaaagaagaataagaaatcaaaaatcagttacgaaatgcagtaattcttcttttcttaattgattgcaatfaaactcggctcaatctttttcagat  
tgagccgagtttaaatagatttgatcagatcatgagacttgacaatcgggattcctctattctatatatttgaagataaaaggtataatacaataaataaatacaaat  
atagtattatcatatgataatggaatcaaatcgcagatattacagaaaaagtttctatttgggaaagaatcaatgacatacaatgcaatfacagacgatgatcattac  
ccttaaccgggttattcttccacttctagatagagaaaaaactaaaggagaatgaatgaaaaagacagagtttggaggttagacccttttaagactctcttc  
aaaaaaggacattttgaacttttaacagcacaatcgtgagtaacaagtgactcgaatgctcgtagaagaaagagaattgatttcaaatggtagaactagat  
gacgaagtttctataacctgatagaagagtagttttgattacgactccgatcaagagcagagaagctttcattcagattggactgctatagaatctggaccatcgt  
agagacgttcaaaaggctcctgatgataagaatcatacttgcggaactccatggggctatgggctcaacgcggtagacgtttgtccgaattttctgagcaca  
cctccgaccaacgatacaatgaatttttctattcacaagaaaaagattcggaaatcgaatgctactatagcaccggaggaatattcggaaatattcttatata  
atccattttgctgggggttactaacaggactcgtcgcagagacgaggatcgtcgaagagcgaaggtatccgggtattttcatacccttcttgggggtgta  
tatggcttacaagctaaagggtagatgagatctgtagtagtaaaagaatttgccttgattgagtagctattttccctcttaccgcgattattgtatatgctc  
tagaagagcacgtatgcagagaggaatfacagtttaataaaaaagctaaaaaagttcaactttacggcaatataatcaactaaagcctatgtataatcctcc  
agcggatttgggggtccgagagtggtgaataagattgcatgtggaaggagtagacgaaaaagatttggattcgaatagcgcactcactaagctgacttt  
gaatccaatttcaagctgattagaagatagaagggcgcgagatcggaaaaaagaaatccttttaattgcttctctttttgctattttctattttatataat  
ccattgacttcttttttagaactaaagattctaaaaaaagattctataaaaaatctttttgcaactcaaaaatacaatagctcaatattcttataatgataact  
aattatataagaatcttaagatatttttgaatagatcaaatcgaatagatagaataagtaaatgtgaatggagacactattctatgatggatttaactaccctctatt  
ttcgtccttttagtaggcttagatttccggcaattgcaatggcttcttattctttatgtgcagaaaaaagattgtctagaaccgacgggaccgaattttctcaatgat  
ttccacacagatcataatcggatctttttagtgaagtaataataatggtatgttattggtcttctcacacaaatgcaaacccgctatggatggggattatgga  
tgggatagagctacgagcataaatgcatgcatatcgggaaccgggtatagcaggtttttaaagtgatcaacaatacttttgaatagaaggtcaatgatctaac  
caattatttacaggatctagttggcgaaggcattcagaatcaaaaaagtaaaagcgaatcatttagcttattctcaatttcaatcaccgctgttagtatac  
taatatgaattggcagacagacacatagatagaacttcaaaaggtctcgaagaaagagtaatttttctgggctgtattctttctaggttactagattcttag  
cggttggggctccagttatcttggtaagaatattatctgtacttccatcacaatctttttccacaggggtcgtgatgttcttacggaatcgcaggctat  
tcttagccttactgtgtgactattttgtgaatgtaggcagtggttatgaccgattcagatagaagagggagtagtgcattttctgtgggattcctcggaa  
taaacgctcgtcttctcgtattctttagcggatcaatcaatagaatcaggttaaaagaggtcttttctcgtcgtatctttatagaaatcggggcca  
ggggccattccttactcgtactgatgagaagttttactccacgagaatgaacaaaaagctgccgaattggcttattctcgcgacatacaatggaagattttg  
agtaccaattgaatttttgaatgaattgaatgaagaagaattggaagaagaaagtttctaacacgagggaaaaaggtccctcgaattgcaattgtaaaggg  
attttgagattatctaaaggaaggaacaatgagataagagaaatgcttcaatttgcgaagtgatataatggcgaatattcttccattttcatccgaaagac  
tttttctatttctattccactcactgatcgaagaaagaaactcaatgcaatgaaattctactagatagaaaaaaggaatagatacaaggtcacaacctgttat  
agaattttcctcaagaaaaaagaatatcatatagatcagcgaataaagcggattcattaacaactcaattttagatcaaaaatgaaaaaaagaaagcattgcc  
ttcttctatacttctatttacttcttgggagctcttcttcttcaaaaatgcttggacttggattaagaattggtggaataaccaggcaatcccaaac  
tcttaactgctattcaagagaaaaagattctagaagattcatggaatfagaagaccttttattcttggacgaaatgataaaagaaaccgaatcacatgacaaa  
ccccctataggaatcgaaggaataatacaatfagccaaaatagataatgagggatcctcatalcatttgcatttctcagacaaatataatctgttggctattcta  
agtggttcttttctggtaaaaggaactgttattttgaattctgggttcaggaaattcttataactaaatgactcagtaaaagctttttattcttttagtactgattt  
tttggatttactcaccgcgggttgggaactactaattcgttgggtctataacgatcttggatgggtcctaacgagctaatttactattttgtttagtttctgt  
gattctagataatgttgaattttgggtctttttgttaaacgcctatctcctcgtctgtagtcatttactcaatfagtagagcataaactcatttgcgacgaaggtatg  
taataaaaatagatccttttctttagaaagaaagccttttccattttagcaaaaatctttttctatttctacctgctcaaggtattcactcattccagtaactgttgcag  
tagaatgacaacagattcgtgtatagggaactagattagcttagctacatctaatfattttagaattccgggatctgtattggacatgaaaaatagaatactttt  
cttgggtaaaaggaacagatgactcgtatcgtattctgtatcgtatgataatcgaataactggacatctattcaaatgcatatcccattttgcgacgaaggttatg  
aaaaccacgagaagcaactggacgaattgtatgtccaattgccatttagcgaataagcctgtggaattgaaagtcccaagcagtgcttcccagatactgtatttga  
agcagttctcgaattccttagatgcaactgaacaagttcttctaatgggaaaaagggaggttgaattggtgctgttcttattttgccgagggattcgaatt  
agcggccggaccgtatttctcctgagttgaagaaaagatagaaatctcttctttagagttatctcccaataaaaaaataattctgtgataggccctgtccc  
gtaagaaatagtgaaatcgttcccatttccccggaccctgctatgaagaagacgttctttaaataatcccataatgtggggggaaccgaggaag  
gggacagatctatcctgatgtagcaagagtaacaatcaggtctataatgcaacgtaacaggtgtagtaagaaaaatcgcgtaaaagaaagggggatgata  
aatatccatagctgatgcatcggatggacccaagtattgatcttatactcccggcttagaacttctgtttcagagggggaatcgaatcgaacgttgaacacftaa  
caagtaactcaatgtgggaggttggcaggggagtcagaaatagcttccagatccattacgcttcaaggcctttgttcttctcgcacccgtattttgacac  
aagtttttggctcacaagaaacagttgaaaaggtcaattgtacgaaatgaattcttaggtccgggatttccatcaagttgtaaaaaagccgcgatttatt  
ggcgattgctagaattctatgatccattttgaaatctttttgttagactattttgttgcgagatgcttctgcaattccttatttctatctcatgcaaacga  
ggagaatgcaagcgaaggcagaaacaataaaaggaacaatccttttaggaaggattgctgcttcaatcctctattgggcacagaaaaagcctttttgct  
tttctgtgctgattctctgtatcgaataatgaatcttttctctattcggcaagattactatttcttatttgggtctgctctgaaccttttcttaggttcagggc  
gatgtatggcaaaaaaggggaaagaaaatagcggggcaaatttttgaccaaaatagaattgctgactgttcaatfaagttcaatttgaacttacagaa  
attttgcaaaaaaacggatacttccattgaaggctgtttttatttttaggctagttagtattttaaaggttttattgatttactctaaataaatcaatgattac  
aagagacttctccgggaaataaataattgatcctcgtattgatccttcttctcctcgtctataaaagtaataatcttggcgagggggtataaatcaatgat

ggattactcactaacattattaacaacaaaaaataaacaacaaaacgaataaatagaggattctgaccatcagagcaaaggcttctcttgttattttacaacataaa  
ataggaacaccggtttaggtatggaatagatfaaaaaagtcgggftaagaagtaaatccggcggctcttccgctctaatcagataaaaaggggtaaggacc  
cgctaagttcctatttttcatgtttacaacctggtcctccaactactatagagatgaaccaatccagaatatgaaccgtaaaagaaaacacattaaaccaatcaca  
gcaataccgggttacgtactatcagccaaagaggaaattctccagtagtaccggccattcccctacttctccacattttatcaagggtcatgtagacaaaaa  
cagtcattgataaggtatggtatcctcctcaaatgggataagaagaaacttcttctctcaattgaagaagaaatggaaaataaacagcaagt  
acaaaaatgagtaataaccccagatagactggtacgattcaattcaacatttggcttccgggttgattgtgcatagttctatagttggaattggtttatcgttgat  
gaaactgactgctgatattgatccaaagaaaaaacagtaggtacagctagccgtgaacagccagccatcgcactgtaaaaaataggatagggtcgaatcattggtca  
ttgagggcctcctaaaaggtactactaaattcatcgattgttctaaagaatcaaacggctcgtttaaaccggaattcctgtcggcttctgtgaaatactggttgcc  
gaggacttccaaacacgtcataagctaaaccgtactgacaaataaccaaccggcaatgaatagggaaggatagtaagctatgaaataaccagatcgaatactg  
gtaataatcagcaaaagacgtctcccgtgtccagacatgctgagctcccaattttgtacattcaaaaaaggaaatgattccgtaaaagatgggatcaacc  
agtaaaatagaaatfactgatattcatcctgtgagattgcaattttgtacaaaagggtatttttagtataccaaaatagtagtatcctctatgacacagcaatcc  
gtttcgttggtctcgaacagaattctttttctcttctgttcttctctatagggtaagctatattgattcaaggcatcaatagaaaacctcaattttgagggctctac  
ttaattttcaccggctcgaatagtagaataatcggaaatagggctcgaatcctggaaatctaatgtaatgatcaacaggttgataaaagaaatggaaagata  
ttctatactgacacaatacaaaagagaatgtagcgaagactatccctcgaatccaactttcccctaagaatfaattggtagataataataatctataaata  
gaaaacaaatagtagataatctgattagaagagaaaaacattttgaaatcaagatcgaatcaaaccttgcctgtttactaacttcttaccaaactgcaa  
gcgtggaaacttggcagttctaggtttccgaaatagtgaaatggaaaaagaggtcgaatcgaatcattggtgggtcgaaaaaagaaatfaaaaaaagtaaat  
caggaaagatttcttttttaggagaccctcagggggtcgtggaatgcttttctctcttattcctaatggaatacaatcaatfaaaaaaagaaatggggaat  
attcgactgttcgctcctcaaaaagaaaggttaaatcactcttgaatcgaatccttcttattcctaatggaatacaatcaatfaaaaaaagaaatggggaat  
ttcttaatttttactttactcaattgacagattagacagaaatccttggattcggaaatgaggtcgaatcctctctcttcttattcctaatggaatacaatcaat  
ctctatctgttttttagtattatctaaaataaccgatgaattatgaatttccataacttaggtaaggtcttccaacatagtagtgtagtaaaaaaatggaatfaaacct  
ttactgcttactataactgattttcgttttctattgtcgtttaaacttaaccctagctctatttttaggttgaacaagatagcttattgaaatgaattgaatgaataa  
ggcagaaaaagaaaaatctcttggattcctgtattctacgcactaattaccaattcttttctgttcattgagattcgtgataaatttagactactatttagggata  
aatcgtacctctttttatcccctcgaacaaatcgaatgattgaagttttctatttggaaatcgtcttaggcctaatctattacttttagcgggattattcgtactgcgta  
tttcaatacagacgtggggacagttggtattgattgagtaataattctttttgattgcctctctctgtgctggaggagggcaaaatggaattgcaattgtttgta  
agtattttgcccctgctcgcacataagatagatggaatcagctctgtaggattgaaactcagacatcgggtttggagaccgcgcttaccgaaactgaactaagag  
cgcttcaaaaaatcaaatcttttactcctaatgtgtctcagctacgtatagtagtaacaaaatfaaaatgataaccgcttaatcgaactcctactactgctataaaga  
agaagaagtaataggtaggtagcagaggttgaactgtgacatttgaacaaaacaaacgcgctaccaagctgcgctacatccctttcaaatgttgata  
atgtcattgtacacaattcctattcttttccacatcctaattttctgtcttttctatctatagagaatcctcgtgctatagagaatcctcgtgctatttctcttttggctca  
tataatcaaggacaagaaatgtagatatactaaatcaatcaattcactataaaaagaagattactattccttgtaaatctataggaagggtgattgcttttctggtttatg  
tcggaatttcgcttaaacaaaagaaatacaaatgatcttggcaataatctgatcatatagctattccaataaggaaaggagattttcaatcgggatataaaaaaca  
tatctctgttagcaccggtgtaagtagcttctggtttgggcttttagcagggttattgtagaataatcgtttatttccagatgctttgtcattcccctttttctattctagt  
gttgcattgtgagaaatagatttctgtgacatgataaaaaatcccacttttcaatcccttttttagtataggaaagaaaaagaaaagaaatagattgggtggac  
cttagagctgataaaatgtgtaaatctcattttgaaaaaaagaatcaatfaaaagcagatccaagcagccctcagaatcagagcatagaaaaggagct  
gggttggctactaaaatgaaaggattttgcttcaaatcctgtaattgacaaggattgtattcctaatttctctatttttattactaattgaaaaatttcaaaaat  
ttattctaattgatttttcttctctctcgtttcaaaaatagaggaaataaaaagaataagtagaagaatfaaagtcaatcaaaaaggaaaggaggttcatgcca  
ggggaagatgtagaatcagatgattttgcaatgtgtgagttgtgtcgaaggggccaatgaggagcggcagggattttagatagtagtactaaaagaatcgc  
ccaatacaccggacaatagaaatgaaaaattttgctggttattgctgaagcatalcattcgcgaataaaagaaatgagacatctgtgtcattttcctca  
agatcaaaaaaataaagaacttcttattatataagatagatagatacaaaaatacaaatcaactgtctgatttccattagatattttctatgatcagggtga  
ttactataatagggacaaaagagagactatttcttgatccaaaatfaataaataaaacaaatcaatttttcaatftaaataaaggaaataatcatgtatacatctaa  
acaacccttcaataaacaacaaacttttcaataaacaagcaaaactttcgaatccaaagcacaactttcgaatcacaacaaactttcgaacccaacaacac  
tttctgtagcgtcctcggattggccgggggacgaattgattatagaaactgagtttaataatcgaattataggaacaaggaaataatattatcagacgaataa  
atagattaaacctgaaacaacaacgattaattactctgtataaaacaggtcgtattttatctttaccatttgaactatgagaatgagaacaatttcaagcccag  
tcaatttcaataaactacaggtctagaccagaaaaaatagacatattctccattaacacaaaagtcaattccaatcgaactfaagaaactcaaccagactttaag  
aaacaacaatcggaaactaaagtccgattgttgatttttattcgaagggccagactatataaaagaataatcaattagattcgtgggtttgataagaagaac  
aatggggaagaaaaatagtttttatttattgcaacatgctcgtgattcctacccttaacttaattattgtatctcccggagtacctctccggaattcttttatt  
attcctgtatattactttttatcccttaattgataacttttatttattggaactgtgtaaagattatttggatfaatacagctactgtgcaaggattttacgattaagaatca  
attccttctgtaaaatgtgtattattactataattatgaatactttatgatccggttctcgttccgactgatccacaacgccgaaaatcccttttctgctg  
actctatctgatgagaggaaacaaacgcttcttactctgttgatgaatcattcgaatagcttaaatgagcccctctaaagtttagggcaaatgaacgattttgcc  
cgtcgtctcagctatatactctcggaaactctggtcattgaatcaaatcaacttaataaactaatgatttctcttttagccatccttttccatfaataacaaa  
acgaattatccatataaaatattgattccaatggcttttctactataacttcccacacaaattttcttctactcccctcagttatttcacgatactaaaaata  
gtgggtccatcgtttctatggtcccttttaaacggcaggccctctctataaccggagccctttcttctattcctcaaaagggtatttgaactgtatagttcaactct  
ttgctctacatccattatagataaagctctttcacaataagagttatccatagagcggcatttaattatgaaagttgctaaatagtagctaccctcttagtcc  
gttttttaagataaggagcataagcctttatcttttactatttctccgcttaatgaatagccgtttgctaccaatgggggaattgcttctatttccaatctagatgatt  
ggatttgcaccaaggaaccagaaatccatataccgtagaaatctagatagagaagctctatctattcattggtaccgatcgtgatactcaaaaatgcttatt  
gtttgaaccatgatccgaacgagtcgcacataccctagcacattctctcagcgtgagacatcccttaagcgccggaatttctagcattctgattgctg  
cttctggtttctaataaggttttaaccgttggcatgctgatgatagaaaaatggattgttttagatcattcaacctgaatgattgatcattatgaagattttccatta

aattgcataaaaccgaatttagggtgaaataaattacaagaatctggccactaccaatccttaaacatttctgaaaccacactggatcagtatcgagctgctcgt  
caagcatttccatcccataatcgacaagtcataagcttggctcgtcgtcgcacataaaacatcccttccatgcttcggatacaaccaaaaaggcttgcct  
gttcttagtcataaaccttggatcatttgcgaacttggtaactctccactctagtaaaaattctggttcttcccataataagcactagcaggttgggaag  
cataatcctcgcgtgggggaatgctatagcgttgggttctcctcaagcagaatgaaggacgccatggacgcggctattccgagcattatgtatatactgg  
gtcaccgttgcacgtatcaaaaatgcacattctgagattaaccaccgcgggggagttataacaaaaaatatcgttaattccatcttactgagatatac  
catgagacctgtaatatgattcgtgacctcgaacgaatccttgacctaaaaaaagtgcttctcgcacatacaattgtataagcaaccaagtcgcttctcatc  
ccgggaatccggtaaggtacttttgaacaccaatgggcataattagattaatattattaaatfaagtaagaaaactacactttaatatgaaacgtaagaatggaaga  
gaaagaaagaatccgagtttattgtttcacttttttcttattctatatgaactatagattctattaatagtagattgaaataatcatagattgaaagattatataata  
gtaggataagacagattgaaataagaaaaagaatgggtgattcgaactactaaacaaaagagataggatctattctcgtttttccaaataagccaagctgcca  
ttgcataattggcacttaccgagtatagaatagatcgtctctcttctctacgaacagaatggcttcttattttaatggaatgaaataatattcacgcttctgacacag  
aatcccctagaagggttagtactataggtatggatagcttcccaatgcgataaaaataagtgacatcgttctattttcttctgataaagggtatttccatgggtt  
ccttggatcgtgtcactatgctgattgaatgacccggctgattccttgggtgcataatagcacaagctctagtttctggttggctggctcgtatggcttatac  
aattagcgggtttgatccctctgatcctgttctggatccaatgtggagacaaggtatgtcgtcattccttcatgactcgtttagaataaccaatcgtgggggtggtg  
gagtattcaggaggaactgtaacgaatccgggtattggagttatgaaggcgtggcagggggcgcataattgttttctgcttctggttctggcagctatcggcatt  
gggtatattggacccgaataattctgtgatgagcggacggaaaaccttcttggatttcccaagatcttggaaattatttcttgcaggggtgcttggcttgg  
cttggcgcattcgtaacgggttggatggtctgggataagggtctgactctatggactaacggaaaagtaacagctgaaatccgggtggtgggtgcagaa  
ggtttgatccttttctccgggggaatgcttctcatatattgctgctgggtacattggcgcataattagcggcctattccatctagtgccctcactcaacgtctat  
acaaaggattacgtatggcactatgaaactgtacttccagtagtactcgtctgttttttgcagcttctgtagttgcccgaactatggtgatgggtcagcaactac  
cccaattgaaattgttggcctactgfatcagtgggatcagggatcttcaagcaagaatatacgaagagttagttggttagccgaaaatctcagtttatcag  
aagcttggcttaaaattcccgaaaaattagcctttatgattatattgtaataaccggcaaaagggggattattcagagcagggctcaatggacaatggggatggaa  
agctgttggatggttagacatcctatcttagagataaagaaggcgcgaactttttgacgccgtatgcctactttttgaaacatttccggttgggttagatgaa  
gagggaaattgtgagagcggacgttcttttagaagagcagaatccaaatagttgtaacaagtagcgtaacgggtgagttctatggtgcaacttaattgaggt  
aagtattctgatcctgactgtaaaaaatagcagggcgttcccaattaggggaaattttgaaatagatcgggctacttgaatcagatggttcttccgacgag  
ccaagggttgggtacttggctatgctaccttggcttcttcttctggacacattggcatgggctagaaccttggcagatgttttgggttattgatcca  
gactggatgctcaagtggaatttgaacattccaaaaagtcggagatccaactacgaggagacagccagctgagccgcatgcttggatcttccactctctt  
ttgatttgacatgggaaacatcctccatcccttcttacttcttcttcttcttcttcttcttcttcttcttcttcttcttcttcttcttcttcttcttctt  
aaccacgatcgaatctatggaagcattggttatacgttctttagtttctgactttagggataatttttctgctatcttctccgagaaccactaaggttccgactaaaa  
agtgaataatfaattgaaagtaagaagtcctccatctgggagacttctactcaattagctcccgcttcttccaatgagatcttaattgtgagaggggtgccc  
cgcggtatataagcgaatccagtaaaagcttacaagtaaacagataggaatggcgaactaaagtctgttcttcttcttcttcttcttcttcttcttcttct  
cgaagagatcgtgatttacaactacaacggaatagatatacaaaagtaaacacaaatcattaaatggaattatggctacacaaccgtgaaagatagttctagacctgg  
accaagacaaactcgtgaggaatttattgaaacccctgaaatcggaaatagtgctccgggttgggggactactccttcttcttcttcttcttcttcttct  
ttcgcggtattcctatctatttttagaatttataattctccgttttactggacggaattttagaattaggttctactaacgaaactacgaagtcatagttttccatcc  
aaaagagccttctactttaaagctctacatttctagacattctggtagttcgaacttgggttctgctatcttctgaaatagatggtgtagtctttagaatttct  
cctattgataatcatagaaagcactgfatcctatcaagatgattctaatctcgtcggatattttattcttagtcttctgaaacacgaaatagatagagtgatcaagaa  
aaaaaatgaaactatgattcatattaactattcagacctcgaaccagactgaaaaaattcaagtagttcttaataaaaaataaaaaagaaaatttcttcccaatt  
tgttggccaaaaacaacttttctcctcgtatttgcgagcttacaccgattcaataatgatcatcaagcgggttcttcttctgaaagaaccttgccttggtttagctg  
agactcaatcctggtctagatgaactaaggtttaaattgaaactgattcagatcgaacaagataatttaccagaaaactactccaattttgcttatttattt  
atctagtaaaacaagatgaactcgtacacaaaaaaagaaatccaaaatgggaaagaaaaatcaagagcccttaagatcaacatttgggaaagaaa  
gatagacgagccaactgagatttttggcattatcacaagaagaaatctgatttttcttattctatcttcaagcgaactcgaaccaaccagtgctgatga  
agtttgaaccttttctaatatccgttgaaaatttgggttcttggagccgtacgagatgaaattctatatacgggtctcggaggggggtcgggttagtacctat  
ctcaataaagtatatgattggttggaggaactgctgacgttctgagatcaggaactgagatgataactagtaaatatgttctcctctatgcaacatatttattggttgggg  
aaacttgggttgaatccgatcagttcagcagcaagatgaggttctaattgatcctgcacgtatttctggtatctcacaggttgggttataaaaaacc  
cgcgaattaaactgggtcactggtggtttagctgtattaactgacatggttgggttaactggttattcttacccttggatcaaatggttattgggcagtc  
acaggtgctcctgacgcgattccggtaataggatcacccttagtgagttattacgtggaagtctagtggttcaatccactttagctggtttatagttacatacct  
ttgacttctctgcttactgcttatttattgtaacttcttaataatgatacgaagcaaggtatttccggcccttataaggaagcactcctatagagatttctatctc  
atatacatatcgggttaggttgggtatttcttactacaaacatgggttattctaaataagacatgctatttagatacttcttcaactccgaactattgatacaata  
atacaaatagttgaaatatttaccgaaagaaagagggcgaattatgggagtgctgacttgaattattgattggccatgagatagagattggtatgccacat  
tagaattcagaccaaggtgctcctatcaatcaacgtaagctccctgctagtaagtaggctggttcttactgaggagaatatttctatgatcacctcaa  
ccatgcatccatgaagaggctcgaatcctatagatagaaatgaaataatgcatgacatgatcaattcttatttacttacttttattatagatggaa  
atgacttatttcttctgacgattgctgacgcaatactatcggagtaaaagaaaggatcaaggaagaacgtaggctaaacttttatttttattagtaacaagtaaa  
tacttgggttggacgtaagaaactgcaatattgggggggataataccaactaatcaagagacgcgagacaatccaaaagcaattgatcatgataaattgtaag  
cccacttggatattgagcattaccataagagtaggattcttcaatgaatagttgtaggtgcaacttcgaaaatagaatctgataaagcttcttacttagagccatt  
gagccattatataccttattctattatgtagcttctacggtttatttcttcttcttcttcttcttcttcttcttcttcttcttcttcttcttcttcttct  
aagaattcactatcccaataacaagaacactgactaaacgatcctgattaaagagcaaaaattagctaaaggatgggacataattattacggggaaccgcgtg  
gccaacgatctttatattttccagtagtaattctaggtactattgcatgtaattgtaggtttagcgggttctcagccgtcaatgattggtgaaccggcggatccgtt

caactcctctggaaatattaccggagtggactcttcccggtttcaaaactccgfacagctacctaataagttattggcgcttctcttaatggttctgtccgacggg  
cttattgacagctcttctagagaatgcaataaaatccaaaatcattctgctgcccagtagctacaaccgttttttaacggtagctgacagctcttggtaggtat  
tggagcaacattaccatfgaaaaatccttaacttttaggtcttctttagggattttcagttgattcattcaatcgtgaagtaccgtgcataggtactgaaatagttact  
ccaagtgaatctccctagatacctataatctattttatgatccattcgcgaaaatagattgtcccaaatgcaaaatgtttctttttttattctaacctgaaa  
aagaagaagagggaaaaatgcaatggattcaactagaacttattcttaggtaaatccattgggagatgcttcttagagtgccatattctgtttccatctgcatc  
gaaaactgtcaattctcatgatcttctcgtctactcaaaaggctcaaatagtgatggattggccctttgagacaattatacgtctagaagcgacttcaattga  
tcaataaaaatacaatcaatggaatctttttgttttcttttagattagtaaatctttttgaaagcttaaaaggggggaagtaaacctgttttatttcttggaaacgagta  
ccctctccctccgtggaagaaaaggaagaaaataatcaatcaaatcagagaagcctcataaagcctccttaggggtaaacctcattggccatattctagaaa  
aagtatctcatatttgcatttccattcccaagcaaaaatactataatcattcgaacaggcatggatacagcatctataggataactccatctttagtgttcttct  
gactccctgtgataccgcatctcttctgatccgtaactcaatcggaaatccgtgggttctgtcaagttagctataggtgtgccgtatcaacgatttctacggaag  
gcggtaagataatcttgggagcttattgatctagacctttgacgcaaatgatgcgggttcaactccatagagattacttcaatacaatcttcaaattagtaaa  
atttctgtaccgatttctcaatctctgattgtagaatattcgtgcggcaccgtcccaatttgcattgtgatacatgttcccttcttctcaagtaaacgtctcga  
aggcaatacaacggatccgctgacttttcaagcgggacagaaatgaaacgaccataaaagacgcttactatctactctgattcaacacacttccactgtag  
gtttgagtgagctctgactcctcgaaccataagactagattattttagcattgaatcgttttctcttgaagggggttaattctttacagacgtctttttta  
ggaggtcgacaccattatcggcataaggtttacatcgctatacaactaactgtacaccattttgcaatggctcgtaatgcggcatcttccactaccagcac  
cctttaccataacttctgctgttgcgaaccactgtacgaatagcatctacagctgttcttaccagcataggggtgatgcttttctgagcttttgaatccacaagtacc  
cgcggagaccagaaaaccaccgaccttgcggatctgaacagttataatagattgtgaaactagcttgaacatgaataactcctttgtattctacgtgactctt  
ccgtaaaactaaaacgcgactctacgcaaaccaatcgtacttctctacgtgaaccaatttttggatagcttttgcataatttattctcataaataatgagttagaana  
acaaaagaaaaaagatacaaaagataccttctcagggtaaaatatacctttacttgaattttttatttggaaatttggacatttctgcgggacttttttacttttagaa  
agtcaagttcttttgaagattaccctgtcttggattgtctcggattggaacaaatgacttaattctcaccagcctacgaatcagctgacattttagcaaaatttacc  
gaacagagctcttatttccatatttccgtattcttcttaaaactatgaatttacttcttggaaaaataagctcttggtaattttagaacttgaatttttaccctagaaa  
aaaaagaaaaacctaacccttgaatcttggatcttcaaatctcgtatcctcagctctcggatcttccgtacgcttcaatctttaggggaagtctataaattatagccc  
cttcttgaatcataacgacttactcaatttggacctatccccatcagfatctgtatagaactagaccgacttcttcaaatatagcccaggatgatgggtcattct  
ctaggcgaacgcggaacattccgttggtagggcttccataactaaaccctcgaagtaatttcttctctcgggtttttttctctctatttttcttctgtcatatttt  
tttctctattttctttttattttcaataaaaaaacgttatttttggtaaaaataggaagttcaagatagaatttgggtactataactataggtggggcgaattaccgct  
ataggcggggcgattaccatataatacaaaacttcccccaattctgtttagtcgagcttctgatctgctattatacctcagaaagtagaaagaatagcaattccc  
attccgccccaaaccttaggaattctttagattggcataaactgtaagccaggtcggctgatacgtttaaaggttctagttctatattcccttctagcttctc  
ttttgatgtcgaaagttgaaaccaagaaatctgttacttctctgatgttccgaacatttcaataaaaccctctcgtagaagattttaaacaatgtttcggtaattttg  
tagatactaccgaacagttctttttattctatgcccgttctttagaggttagtaaatcagcaatagtgctccttgcataaagacttaattctaggttctcctaat  
ttctataatcaacatgttcttcttttcttctgtttggattctaaagcatatacgtgaacacaatctactaattttttattttagctataatcttctactagattataaactca  
ggagctaatgaaactatttttagtaaaatcaattctcaattctcggcgtcgcgcaaaaacgcgagttccttttggatttctttttagcaatgataaccgctgatt  
gtcgtcatagctgattattataaccgtcttgcatttgaactctttacatgtacgtacaattacagctcgaattacttggatcttcttagaggaacttggggcactgcgtctt  
gattacagcaacaataacatcaacaatcagcatatcgctgattactagcagctcctatgactcgaatacacatcaattttcgaactccactgtattctgtacatttaa  
aagggtctgaggttgaatcatatttttatttcaatttgtatttcaatgcaaaaagatgaaagaaatattgtcttccagaagaaagaacctgggtttttattttcaact  
acttttttggggggtatttttcaaccgaagaaatgactctgtatggcatttggctgagctatggaataactgctctagctacagtttggatactccgccattt  
cataaagtattcgaactgtttaaacaacggctaccaatattcgggggactccttcccgaaccatacgtgttccggctggtctattgtaaccggttctgctgggaaat  
atagctaccagattttccaccagacgtgcatatcgtgctattgctctcgtctcttctatctgcctcgcgtaatccaagtggttcaaggtctgaaagacat  
ctaccaaaaacaataaactgctcggtaggattttcccttcttctctctatgtttttacgaaatctggttcttttgggttatagtcgtggttctctttagttccatct  
ctactgcaaaactggacatgagagtttctctacccagctcctcgcgaatcaaatgagaaggtgtgcaatttcttaattccacaatattcaaaaatattacggataga  
tacacaftaatagaaaggttaggttttaattgaaattataaaatactaaaatataatgctcaagaaagagatcagaatatactagatgtgatgtttattatctat  
attctataattaatgtaattcttttttttttaactccttttttatttactcttattgaatcgcggtaaaatgatttcaattcaataaaaatctcggggcgaatatttactctt  
cctgtctatttgttaattcacaactatcaaaataagacaatttttggttgtcggcaccaccaatgaagatttgggacttcttcaagaaaatcctaccagtcata  
ggttctgtcttcccactgcttctctttaaattggttaggttgaatctcgaatggagcttcaaaaaatttcttccgagtcatttctcagtttttataactcgggacgctct  
ttgtattccttgaattttagtatttctgtttcaatcaaatcagattcgaattctctgtttttttattatttagctttatcattgcttttttagatgtaattcagaccatac  
aatttgaatcctatacttcttatttcttcttcttctatcctcttcttcttctacatcccttttagtttctcacaacttagaactctatttttttaagaaaaaattgc  
agttgctacacgtatatgatagatttactattttagatagatgtatttattcatatagtgactgttcttagttaggatctcgacaatacgaagcaataggttggttattagtc  
atttctataattacatagtaggttcttctatttttttaatecccttttgaaccctaaaaaaaactaacgagtcacacactaagcatagcaatttttataaaagatttctc  
aatttctataaactctatagaaagaggttagaatttcttctttttcagggttttagggaaaaaaggctcttctcattttttattctattactgaacagaatgggaagacag  
ggttggttattctcgtctacgaataccaaatttaactcctaactccatagatagtcgaattggatagcgaataatcaatttagcgcgaattgtttgaggggga  
agctaccctttttgatgattcggcagcgcgaatttctttccgcgagacggctgcaattttacttttactcctttatattctgttttttagtaattcaatgcttttttctt  
gccttccggaatgaaactctatttttaattgaaagctatattctgcaagaatgttaggttctctataaggttcttcttcttcttctgatcccaatattagctctctgtttaca  
gaattaacttctttttagatcttctcaattctcgtattcctcttttttataaaattggggaatccaataggtattatgacgtgattgtatcgatttcttttgaatttcta  
tatgtgaattactcggaaactgagcctgagctcattttttattatgtgaattactcgaactgtagctccttatttttctattctgagcccttttctattctttttagatata  
gttcttgatacaattccgtatttttttctctcttagaccctcagaataatttttgggtgtcgaacaaaagggaatgggtatttgggttgaccaagctgaaaccaagt  
ggattttttttagccatatttttctatttttttaccgggaatcaatcttagatggactaaagattattcgaatttcttactataatttagtaaatgttatatgacaca  
tggtttttttagggagaactacgtctcagcccaggtctgaatttattcataatagttacttactgacttccggtttagtgatgaataaatttcttctgcaaatccc



tataatgagtagcatttgctgctgccgaataaaccaactttaagatgggataagatgctcgafaaggcatgaggtcaatatacaacagtttctcgtagtaacgccaa  
cgaatctcatccagaactctttgtactttgaaaacggacatggtgatgcgttttgctttgaaaaccgctcgaactaaagtagacgacggttggtacttttctgca  
gtttcttagccactcttctctttatcttaggggtatacttaccagttfgaaactgtcataataagggtattccccgcttacctatttctttttttttttttgaatct  
ttctattctgaattcagtaacgacgagatttagatcctttctgactttcataactgtaaatgccgagttggtacgaattcccccaatttgcgacctaccataggatt  
ggtatgtaaaggtatattgctttccattatgaatgcgattgtaggccaaccattgctggtagaatgctagatcccggaccacgtactattgtttcttctcctc  
cttcatattgaccttttctattttgccaataaatgatgagctacaaaaggattcgtttttctgtcacagctgattactcctttttccattttaaagagtgccattcgatgt  
ccaatattctgacgaaagtatggaggtcagaataaatagaataatgatgaatggaaaaagagaaatcctttagctggataaggggcgatgtagccaagtggat  
caaggcagtgattgtgaatccaccatgctcgggtcaattcccgtcgttcgccatcccattattgcaaatccaaaatgcaattttccatattcctagttacgtatfta  
cttacggcgacgaagaataaaactatcactataattttctttcctagttcttcccaagcgcaggataaccccaagggttggtgggtttttctaccaatgggggctt  
tcccttaccgcccccatgggggtgctcacagggttcataactacccttactacggggcgtttaccctagccaacacttagaccggctctaccaactttttt  
gttcacccaacattaccactgtccgactgttgcctaagcagtttgggataccaacggaccctccagatggtaatctaaagtggccggttaccctttttgcaat  
cagtttcgctacagcacctgctgcttagcttaattgccccctccacgtggtattctatggtatgtagccgctgctaaggccatatacgggtgaagtagattctct  
tttctcctaaaaacccttccaaaactgtacaagcttctccaaagcagacgtttctagatgtatgacgactctagacagatggatcttatgaatcgtatgtag  
aagtaccacatgagtgatatataggaaaggaaatctccgaatcgtcatgttatgactttacatcctaggtctccgcgtccgcgtcactgtggttattgttctt  
catgtagcattcagatcgaatgactctatgaaattcgtcactatctacatattatgggtaacgtagagacatcctattttcccccgggggttattaccactgt  
tagcttcaattcgcctctgaccatcaaatfaattggaataaccgctcctcctcttggaaacaaggggcgttccggtctgtgctgcttcaacaattttgtcttct  
catattaccatattctagatcaataattttctaggaactactgaactcaatcactgctgctgcttactcaacagttttctgttgaggctatcccgtagaggtagica  
aattggatcagatcgaattctaggttctgtcgtaaacctaatgttacttcaattacgtaaatcaatgttcaaacccactcaaaaggtgcaatttcccattgata  
taggaactttgtaccagaacaatagatctcccaattatagccccctctgggtagtaaaatatactcccttccaccatcccatagtatgagacaatgtacgcatttc  
gattagggtcgtattctatggttacgattctaccagattatgtctttgtattccgtcgaaaatcgattttacgggtataggcgttatgactccccctctatgcttgcggt  
atgattcctctggaaattacgacctttaccacaacgggtccgtccatggatcaaatattctgtggtgattggttcaactgctctatggttccctgctgtgctcgggat  
agggtttgtataaatgttccgctatttataagatttctcttttagtttttctctatcgaagtggaaatagaataaccggtgaaaggtatgatcatcgtctgaaat  
gcattgtagtctagataaggcccatttctaccctttccgggtatgctgatttcaactgctacactcaacccaagaagagatgacccaatgctttattt  
ctgctctagtgaatcccgatcgaattaaagtataattgattcttcccaataaacgaagactttttctgtaaaactgctgatttgattccatcacaataatgactttccct  
cctatgctctgagttccagatcgaataaattcgaattctattgttcttattgtatggtatgaatataccataaccatcgttatgtaggatgatgagattccatgg  
atagagagccagttccaatagactatggaacttccggtcgcgtgactccagcagggaattgaaccgcaaatttaccaattatgagttgggcttcaaccattca  
gccatggatgcttaacaggatcctgcatcgtaaataaccaattttcatatagaagacatatagaataatgaaatcgaataatcggagatggcaaatatt  
cggagatgactatgaaaacacctctctggatcctcgaattgaagagagattgagagggatccgaatcctaatctcgtattttgaaatgatcgaattctattgag  
ctgactcatagtgatcatttctttagcaagaatgaccttgggtatcaaaaggattgaacaaccgggacgttacttatgatacttagttgacattgataacaaggatc  
taataaattatgagttaatagatcctctttagcagaagacgtatattcctgctcacttattcccaaacctcgtatggggtcaatcgtttcttaccatctcaggga  
aaatcctttcgtccgcttagccctatcgggtattttatgtagattctataggaactggacgactcattttgtcaaatacctaataaaaattctatttcttcttca  
aggtagcagggccttatttccacaagaagaagacgaagacaccttttcaatttctatatactgggggtttttacttggaaaagacaatgttccatacctaagggattcgg  
gtccataaccacgagttccagtgcactagatctttagcacttagcaacgagcccctatgaatagacatatagaattttgtcgggaaatcgaatgaatcattgag  
gaaaaagagcaaaagaatgacaagaacgagactcactagcttcttcttctgtggttccctggtttctgtttcttattcgggatcttcttctcattcctcctc  
aactcgcgatttccgagagaaccaaatccaagtggatgaagatcattggtggcgtgatagtaggttacccttgaattcgggtcgaatctatccgatcttct  
cttttctcaaaagcaataaaacccttctcgaagcctttagataagcttccctggatctgggagtttcttccacggatttggatcgttcttctcattccttg  
atcgtactattggggcgtgctcaaaagatacaaacagggttcgcaacaaaaagggaattcgtacttttctgtcgtcaaaaaaaggcttaccg  
agagcaatagagttgggatacctctctcttgcaaaccttcttggatttcaagaccaccttgcagtaggatacctgcttgggttctttattatattctcc  
ttcagggatttttagatcgtcaggctatatttagtctattttgcttactgctcctttctcagggaaggtggttaaggacctcagaatagagagagcggcag  
gcgcgacttccggaacttctacggggaatgctcattgaatgcgacttcccttattatccctgaagagactcgaacctccacgctcctttacgacgagattttga  
gtctcgcgtgctaccattcaccatcaaggcatttgaagtgaatcattccatgaatagatctatctaatgtagatcttgaagtgaactgtattccatgaat  
ttatccgtaggacaccttatgtatcaaaatcaaaaagatgtacaatccaatttctcgaattcaatagaagcccaaaagggtgcatatggtaccacaataaggatagga  
tagatattcaaaagcaggtctgattacaccttctaatcctaataagaatgaaggacgtgggatttctatgtaaacagagatcctatttccataggtcgaatga  
ccccctctcataataagaatgtgcaggtctggtccggtatggaatgaacttaatactgtagtgcgagtcgattccatgattataagttcattaccctagcggccattcc  
cattttggcggcaacagatcactaattcttttattcagttfagtaagaggatcttgaactaaagaatagacctagcagctaaaagggtatctctgacaaftgcaa  
gaaatggggtcattgatattcctgtatagtagatgctatcacacatacagtcataactcaatcaggaattgtttagctttaaagggtatcttataatttcgacataa  
ggggttattctgttctcagtcattaataactgactatttttagataatagtagatagaagaacgctcgtaaaggagcttattgaaccaagaataatagccctg  
cttccatccaccagaatagatagatttccgaagaacctgctagtgaggaaaggcctcctagggataagacataggcctaagagagagcccaaaaa  
ggatcttctgtataatcctgcataatcctgaatgtatcagttccgtacgtagaccaataatacaatgcaagcaaaagtcttagattcatggagatagaaaag  
catataagttatcatcctgtcatatccatctttgagctccacaattattccaataattacatattcctgatttgcctatggacgaatgcaagcatactttcatgctgtt  
tgagtaatgcaaggagattccccaatatcatgtaagaatagctaggtttccagaagaatgaccttctgtttagatgaaataaaaaggaaatcagaaattcgc  
gtgctgaaactgaaagcgaacttccgaatgaacagaagaagaagaactgcttcttttttttattaccctcctcgcgtatgataagaccgaat  
gcaaacctgctagactttcctcgcacggctcctaagtataaaagaagaagaactgtcttcttttttttattaccctcctcgcgtatgataagaccgaat  
ccatttctttcgaatcatttccaaaagaactactaactcctaacttctcagggaatcctctcatggttggatgactgacttttcaatccttccgacttggctc  
gtaggagcaagtcagaagggtgagaaatagaacctctgatttgattcgttcccaatagccatgagatgatcatttaggggtatcctttgtcaacggatgctctat



cttaaccgtaaggagggggatgcctaaggctagccttgcgactggagtgaaagcgtaacaggtagccgactggaaggtgaggctgacacctcttttcagg  
gagagctaataccttattggttattggttattgacactgcttcacgccccaaaaaaggcagctacgtctgagctaaactggataggagcttcttctggttag  
ggtgaaagtaagaccaagctcatgacttattatcctaggtcggacaaattatgtagatgtagatggatcccccttttgacgtccccatccccccctggtggtg  
cggcatgggatgcaaaaggaaaggatggagttttctcgttttggcgtagcagcctcccaaaaggaggccgcgcagggctattagctcagtggttaga  
gcgcgccctgataattgctgctgtgctcctgggctgtgagggctctcagccacatggatagttcaatgtgctcatcagcgcctgaccgaagatgtgatcatca  
aggcacattagcatgctgactcctcctgtttgaatcggagtttgaaccaaacaacttctcctcagagatagatgggagcattcaggtgagatccccatgtagat  
ctaactttctattcactcgtgggatccggcggctccgggggggacactacggctcctcttctcagaaatccatacatcccttatcagtgtagagagctatctc  
gagcacaggtgaggtcgtcctcaatgggaaaatggagcactaacaacgcatcttcacagaccaagaactacgagatcacctttcattctggggtgacggag  
ggatcgtaccattcagcctttttcatgctttccggcggctctggagaagcagcaatcaataggacttcccaatcctcctcctgaaaggaaagcgtgaaatt  
cttttctttccgcagggaccaggaggttgatccataagaggaaatgcttggtataaataagccacttctggttctgactcccaatgactacgagcgcct  
cgatcagtgcaatgggatgtggttattatctatcttctgactcgaatgggagcagagcaggttgaaaaaggatcttagagtgcttagggtggccagagggt  
ctctaacgccttcttttctgcccacggagttatttcccaaggacttgcctatgtaaggggagaaagggaagcagacacttgaagagcgcagtaaacgga  
gagttgatgctgcttgggaaaggatgaatcgtcccgaagaggagctattgattctctcccaatggttgatcgtaggggcgatgattactcagggcggag  
tctctggtcaagtcagggatggcccagctgcccagggaaaagaatagaagaagcactgacttctcagcactccactggctcgggggagatagctcag  
tgtagagctccgcttgaattgggctggtgactgagcaggggtaaggtgtagtattctgactgaaccgggtgctcattttcta  
agtaatggggaagagactgaaacatccactgaaagacttactgagacaaaagatgggctgtcaaaaagtagaggaaggtaggagggcaggtgctcaga  
tctagtagatgtagcatggagtagatggagtcggcggctcctaggttccctcctctggatccctggggaagagatcaagttggccttgcgaatagctt  
gatgcatctatccctcaaccctttagcgaatgtggcaaaaggaaagcaatcagaccgacccattatctccaccctgtaggaactagagatcacc  
aaggacgcttccggctcaggggacggcaccatagaccctgttcaataggtggaacacattagccgtccgctcgggttggcagtaagggtcggag  
aaggcaatcactgctttaaaccagcattctaaagttaagatcaaaagagtcggcgggaaaaagggaagcctccctggctcctctgtagctgattcc  
ccggaaccacaagaatccttagaatgggattccaactcagcacttttggatggatggagaagagttgctcttggagagcacagtagaaggttgaagct  
gtgttccgggggaggtattgtctatcgttggcctctatgtagaacctcgtgggagcctgagagcgggtgtttaccctgtgcccggatgtagcgggtcagctc  
cgcttctccagcccgtgaacttagcgatactatgtagaccgaattttgccaattcggcagttcagctatgattcgcattcatggaggtgataagatcctcca  
tttagtagcacttaggatggcatagccttaacgttaatggcaggttcaaaagaggaaaggcttgcggtgatacctaggtaccagagacgaggaaggcgtg  
gcaagcagcaaatgcttccgggaggtgaaaataagcagtagatccggagattcccaataggtcaacctttgaaactgctgctgaatccatgagcaggaagag  
acaactggcgaactgaacatcttagtagccagaggaagaaagcaaaagcattccgtagtagcggcagcgaatgggagcagcctaaaccgtgaaa  
acggggttgggagagcaatacaagcgttggctgtagggcgaagcgggtgagtgccgaccctagatggctaaagtcagtagccgaaagcactactagctta  
cgctctgaccggagtagcatgggacgtggaatccgtgtgaatcagcaaggaccacttgaaggctaaatactctgggtgaccgatagcgaagtagtacc  
gtgagggaaggtgaaaagaccctcaggtgtagtaaatagaacgtgaaaccgtgctgagctccaagcagtgaggagggaaggtatctctgaccgct  
gcctgtgaaagatgaccggcactatagcagtggttggtaaggaaccggaaccaccggagccgtagcgaagcagcttctatagggcaggtgtcac  
tcttatgaccgaacctgggtgatctatccatgaccaggtgaaacttggatgaaactaagcagaggtccgaaccactgagtgaaagatcagcggatgag  
tgtggttaggggtgaaatgaccctcgaaccagagctagctgttctccccgaaatgctgtagcgcagcagttgactggacataggggtaagcactgttcc  
ggtcgggctgcgcagcggtagcaaatcagagcaactctgaatactagatagaccaaaaataacaggggtcaaggtcggccagtgagacgatgggggat  
aagcttctcgtcagagggaaacagcccggatcaccagcgaagccctaaatgaccgctcagtgataaaggaggtgggggtgcaaaagacagccaggggt  
tgcttagaagcagccccccttaaagagtgcttaatagctcactgacgagccttgcgctgaagatgaacggggttaagcagatctccgaagctgtgggat  
tcaaaatgcatcggtaggggagcgttccgcttagagggaaagcaaccgcaaaagcgggggtcagcaagcggaaagcgaatgtcggcttagtaacgaaaa  
cattggtgaaatcaatgccccgaaaaccaaggttctccgcaaggttcgaccagggaggtgagtcaggcctaagatcagggcgaagggcgtagctgat  
ggacaacaggtcaatcttctgactacccttgggtacggaggacggaggaggttaggttagccgaaagatggttataggttaaggacacaaggtgacct  
gctttttagggtaagagggttagaagaaatgctcagccgaggtccgagtagcaagcgtcagcgtgaagtagagccccgtgactagccattgcttct  
ccagaggtcataccagggcgtacggcgtgaagtagtaacctatgacatactccaggaaggtcgaacgacctcaacaaagggtgacctgaccgaa  
accgacacaggtggtagtagaatacctagggcgcgagacaactctctaaaggaactcggcaaaatagccccgtaacttggggaaggggtgcccc  
tcgaaaaagggggtcaggtgaccagggcggcactgtttaccaaaaacaggttctccgcaaaagtcgaaagcagcagcctgtaggggctgacctgcccc  
tgccggaaaggtcaaggaaggtggaactgtagcagggaaagccggcagccgaaagccgggtgaaagggcgttaactataacggtcctaaagtagcga  
ttccttctcggtaagttccgaccgacgaaagcgtaacgacttggcactgctcggagagagactcggtaaatagacatgctgtgaagatcgggactacc  
tgacctgacagaaagacctatgaagcttactgttccctgggattggttggccttctcgcagcttaggtgaaagcgaagagccccctccgggg  
gggcccagccatcagtagatacccttggaaagcctcggatttaacctgtgtcagaccgcggccaaggacagctctcaggtagacagtttctatgggg  
cgttagcctcccaaaaggtaacggagcgtgcaaaagtttctcggccagacggacattggtcctcagtgcaaaaggcagaaggagcttactgcaagact  
caccctcagcagagacgaaagtcggccttagtattcagcgtgcccagtggaagggcgtcgtcaacggataaaagttactctagggataacaggtgat  
cttcccaagagtcacatcaggggaaaggttggcacctcgtgctgcttccgacctggagctgtaggtggttccaaagggtgggctgttccattatg  
cgttagctgagctgggtcagaacgtcgtgagacagctcgttccatattcgggtgagcattgagagaccttccctagtagagagaccgggaa  
ggacgacctctgtgtaccagttatcgtcctacggtaacgctggtagcaagtcgggagagataactgctgaaagcatataagtagtaagcccacccaa  
gatgagctctctcctccgactccctagcctccggtagcacagccgagacagcagcgggttctcaccatacggggatggagcagacagaaagcagtaaaa  
taggataagtagcggcagacgagccgtttaaaggtgtcaagtggaagtcagtgatgtagcagctgagccatcctaacgaacgaacgattgaaactgtt  
cctacacagctgatcaatcagcagcacttgcctatcttcttcaactctttagtaaaagatgaaaaaaccaaaaaagcttgccttccatcttctg  
atagatagaggggagggcagagcccttgggtgccttccagtaagaatggggcttcaacttagccaatatttctctatgccttctcctgcttcatggtcga  
tattctggtcctagggcgtagaggaaccacccaatccatcccgaatttgggtgtaaaacttactgcggtagcagatctgtaggggaggtcctcggcgaatag

ctcgatgccagaatgataaaaagcttaacacctctatttgacttttctactatttgaataacgaaaaagatccaaatccaaatgcaaaggctgtcttattcaaacctc  
aatcaacacatccccctctcccacttcaacctcggaacgactgttctatagagaaagggttccatcttcaaccgaaatgaaatggctgaggagag  
ggagggtcttttgggggtaccggggaagatccagtgagacggggtggcctgtagctcagaggattagacacgtggctacgaaccacgggtcgg  
gggttcgaatccctctcggccacagctccaaggggaaggcctttactttccctgagggtagaaaaccatgatcgggatagcggacgtaaaactattga  
acttgggtatgctcttctcttctgcaagtgaatcgtagaacgaatgtgacgatgagataaaatgcaatagaacaaggatagcgaacgggttacctactccta  
agggtcaagcaagcccttaattcaattcttattctacattaaagaatgaaatcaaatctcccaagtaggattcgaacctacgaccagctgtaaacagccgaccg  
tctaccactgagctactgaggaacaagggggattcgaactcctagagtcaactcccgtctcaacctatgaacaatagatccgaaagcttcttctgaactccgg  
aatttctctgtagtggctccgtccatgctcattctataggttaagcccagagtggctctattctattctacttctagcacttctatcattatccatcccttgg  
tcttattgacataagagatgctattatagctctcttctataatgaaagtcagaatctcatcgaacatcgaagaattgtgcatatagaaaactcctaagaaa  
gaaaaaaggagaccatgcatgatttcaaatcttctacttagtagtcaagtctctgatgaggataaattcggctgttgcggctcggactctattatgggttct  
gaccacatttccatgggtccctctatagatcttctccaatcttggattagggaagaaggagataatcgcgactcctgggtgttccattatgggagcctcatgatctt  
catatgcatctattaccctctgcatctatttcttagcctaaccgggtggaagatccatccaatttgggtatcatggaactcaaaaacggatcgaatgtgactga  
aatgacagatctcagaggtatcatttccacgatacctaaaagggtgaaatagcgaatttcaaccatttctataagagaaggttccattacttggaaatgattct  
atatcaactatagctattgcatataaagaagaaagaaactaataagaatgcaagacgcggaatggtagtgaatagagagaagattcttctgttcttctctga  
aaatattctatctctctagacgccgtagagaattgaaatcttctcttcaattctctgactcgaattgaaagttacggagagatccatttgaatgaa  
aactacataaaaactctggacaatttcaaacaggccaagcgtcttaatacatatgcaaaaaaattcattatggcccaccattgattagaagattcaactgtatgaa  
tcgctattggttgatagcaataatggcagttgttctgtagtgaagatacagatgtaccacaattcatttagagttacttaataagcctatttctatacattctctac  
cgtgaaatctctgagccgaagatgtagcatatgctatttctctaaataaagaatgtaccctctcaaatccaaatggcatcgaataaataaactcaaatccagtagt  
agatgaataatgcaaattttctgtgtacgagattgaataactcaaaaactgacataatttttctctctgacgaaaaatacatgaaaaagaaaggagtag  
aaaaatttggatttattggttaagaaagaaaaagaaactgggttctgtgaaattcaagattcagtttccaataagatacggagactgctcaccatttggaa  
attcacaaaaagatttctcggaaagaggctccgaagacttgggaaacgtcaacgttctgcttatttggcaagaaaaatagatgactgtataagaaa  
ttaatcagtcagttgatattaggagcggtaattctcgtcgaatttttcttatttattagtagtcttagatgactttagatttgcattttagagcctcgtttgagg  
aattcatggaataatccatttctggaataatgaataggaagaaaggatagactaccgcttacaagaaagatctcatgatagcaaatgggcccacgac  
ccatcaatgcatggtgttctcactgactgactctctgatggtgaagatgtattgattgtaaccatattaggctatttacacagaggaatgaaaaaacggcaa  
ataggaaagctacttaggcaaggataggggaattcctaagaaagaaaaagaataagaacacagatacataaaaaaaagaataaataagacgaaatc  
gacctcccctacataatttctctctatacaaaaactagcaagactcactcattggtaattccatcaatgacaccttgcgaaaaactcgttagttcggtaaat  
cctcttatacccaaggtaaaagctctatagataaaaaatctatataaccgcgattatagaccaactatatacttttttttagttgatgaaaaaacttttccggacc  
cctttacaagaaatttataatccaaattctgaaaaaagagtaagcagatccataaaacatataatgctatgaatagacaaaaatagctagacttacagaagaat  
tgcattagtataaattcatatgaattttagaagaattagaacttcttggaaaaagttgattgaggagttagccacttggataatggttaattcccctatttcatatca  
aaatggattcctatagatccataaacaagtaacaagcagtaataaagaaggaatagcatagatttcccggttcagagatagacaaaaggttttttagtcc  
ccaatgaagtactaaaggacctatcttctcttattcaatggaatttggatagatttggtaaaaaaagaaactccactctcgtgtgataaaacgaaatctct  
attgactccttagatattctttcccataacgataatgaatacaacgaatcctttagtactactgtaatttggaaatgaacacgcaaatccatcaaaaagtaagta  
aatatattccgaaacataaaaacgcagtaactctcagtaaaaagagctatttccaaaaagggtgaatataccaactattactaaggatttcatcttggaccag  
aagcaagcaagaggtggaataccacaagagaagggtacccataaaaaacaagttcttgaattggaatgtatttcttaaccaccataagaacctattctga  
ctttatctggtgaataccaacaaggttccattgaatgaataacagatccggatcccaagaataaaaacttccgaataagcatgagtgatcaaatggaataaag  
cagcttgataagaacctatacctagactaacatcataaccatgagactttagaataaggctaaacttcttaatactctctgagcaagagctaaagtggct  
cctaagaaaaggttagtgtagctatfaaaagaatgaactcattatcaaggtagggatagaaaaggaagaaagtcgagctataagaaaaatcccgcgcaa  
ccatagttgctgctgtataagagctgaaatgggggtggctctccatagcagcggtaaccatacgtgaagagggaaattgtccgatttgcactgcaccaag  
gaataaataaaaagcacacaaaatgtaagcaagaggttaactcattataggaatcagttattagctattttaaacaatcccgaactcctaaactcctgttatcca  
aaaaaacctagaattcctaataacagacaaaatcccctacagattagttacaaaagccttttgacaagcactcgtcgaattggcgtgtaaaccaaaagccat  
caataaataggaacacattcccacaagctcccaaaaaaataaattgtatcaaaatggaaactagtaaccaatcccaaacatggaagtattgaaaaaacttatataaca  
aaaaatctcaaatatccctcactgtagacataataatcactataaataagaaccaggactcctacagtagtaattagtaaacataatagaagtaagcgggtc  
taagatccaatttaaggaaaaatcatttagcggcgaagaccatagatattgatagatagaacttccatttattgtgaaatagacaggtgaaactgagaatccat  
agctatacttaaaagtaaacactagaaaaagcccatatgacgagaaatgttctgctgttggaaacaagaaaaagtcacaaacccttagacataaactggaag  
tgggagaagagggtattaccatgcatattgatattgtccataagaaaaaagaaatgcaatttttacttcaaaatttacttcaattttctataaaatgaaaaagttc  
cgattcaccaaactaattctatctatttctgaaggaaataaaaaaactagaaatttcaaaaatttctcattgaaacaatcaaaaaataagaatagggtttgtg  
gttaagtcacaaaagtaataaactcgttacctgatttacctaaagaaggacttttataaaatacaaaaaaagattgaaatatttcttfaataatttttatt  
aaatgaagcagctccctgttctgtaactcaaatgattgaaatcaattctggaatacttataaactatttattgaaatcttccctcttctctccctcttatatggg  
ggatagggccccatcttatactgtatagagagtacttgaatataaattgatttaaatgaaaacctttgtatattctatattataaaacaagctcaaaaaa  
atataatattgtaaaaaactctgtcttaccgcatagacaaaatgaagtaaaaaagaaatcagaatttcaatatcttttagatctaaatataaactaaagaaaaga  
agaagatggattgatttgcgcaatagatgctttcacatacaactagaaaaaagtaatttcttttgaatggcagttccaaaaaacgactctcagatcaaaaaag  
cgatttctgcaaaaacttggaaagaaaaagacttatttccatagacaaatctatttcttagcaaaatcagatcttctggcgtcagcagcatcaaaaacaaagg  
gttttctcgcaacaacaacaataatagggttttggataatgaattgacctatccccaaaaaattcaatttataatgaataaattaggataaattaggattaa  
ttaatgatttattttatgtgcaattcctcgttacaatattcttgaacaaactcctctgatataaaaaaagggttttggtaactgtgacctaataattcttctctatc  
aatgaactttcgaataagaatccgtataataaataaaaaagggtattctattgaaaagtagatctctgcaataagacttacaacttctacatcttattcctaatt

taacaaaaaattagttctatattgcaactgagaaaaattgtccaactcttcaagttctattggcacaagcaagaatTTTTgttaaaaaattcgcaacgatactac  
caaacgaggtctatttaagaattctaatgtcctaaattctatggaatctccaatctcgacgattcgcgagaaaataacttaattctttaataaacctgtatttca  
cttagccgcatggtgaaattgtagacacgctgctcttaggaagcagtgctcaagcatctcggtcagtcgagtgccgagtgccgagctcgaaaaagaatacaatag  
attataaaaaaatggatcaattcgaatttccaatttgaatggacctctcttattgctatttgaactttaagaacataactaactatatttcttcaacaatttca  
attgtgattacgattcatttaaaccttattagttcgtgaacttggggattgctgattcgcagaaaaaggaatgatagccactttttctgtataacaggattcttagtt  
ctcgttgggcttctcggacatttccattaaagtaattatagtcattgatcttcttcatggcctctgtatattctcatatgattcctaagatacagaactctaaaaat  
gatttaagcacaataactacgccgagctattttaaaccgaagccttggccacgctgggcttftaactgaaatgcatcaatccacaatactagctcttacaatct  
cagtggttaatgatgcatgtagtattgactaagctatgagactcttctgctggatccttattatccgctcttctaatgattgattcgaagaatttagattct  
ttcgaaaaagaagaaatgTTTTgcttaaaacattttcttaatgagattgaatttctatgcaaaaagaagtgcttfaaaagcactttttcttatttccaattatt  
acaaatacaatattgagcgttggattctggagttatcgtgctcattagctagggttaccctttaacataggtattcttgggagcagtagtggtcaatgaggcg  
tgggagctcactggaaattgggacctaagaacttggcatttattctggaccatattgcaatttattacatagtagaacaatccaattggaagggtacgaa  
gtcagcattttagctccataggttcttataatttggatctgtattttggtatcaatctattggaataggttcatagttatggttcaattacattaccatctaaatgatt  
acatacataaaaccttaataagaattgaaaaaacttccattttgttggatttggagaacccctgaaacgcttcaaaagggttcaaaaatcgagatagatcaatt  
agactctttacttttctgaatttttagatttccactatggaatagagcggactagtagaagaaaaaaatcctatttaggataaattggataacagagcctctac  
cctgtcaacggatagcgagagaacaaatctggataaataccgattcctattctggttaaaagatacagattaaagaaagattctcggggccggaatcctca  
aaatttctgttggaaatgaaatgctgtatccatagaactctgtcgtaacatagataataaataatagggattaatatcattccaattgccaataaaagtaattag  
cattttggcattaacagaattttgactagtaattagtcacaaaataactaattccgcaacaaaaccactcattctgtaaggcaagagagcattgaaaaagc  
tactaaacatggttaaaattttggcattgggatagaacccctcccagttctcagataaacaagcgcattctatcacagccgttcccgttaagaaaaaaagtgt  
agccccataaatccatgggataaataatttgaataatagctccattgagtcctaatgttggatttggaaaccaattctataaataatgaacccatgtgagagcggaggag  
taggtattctttttgaaattgctggccaagagaagttgaaagctgcatagattttgcatcgtctctattactaaccaggggaaaaatagataatgagcatga  
ggtaacaattccatattgatccgaatcaatcctgtatgctccatcttaatagattcccgttaaaagcatacatgactgtaattgcttccccatgggtatctggtaac  
cacgtatgtaggggtataatcgcaattgacagcataagcaataaggaagcaaaaataaataatgatttccaatgttgcagggtatgattgataaataatctttcaa  
atcaatctgttctgttgaaccgtataagcccataccatgaactccgattaagaaaaaatggaaccactgcagtatcaaaaataaacttttagctgtaatagaga  
cgctctccccccccacatggataaagtaagtaaacaggaatatttcaactcccacatgataaaaaaaagtaaaaggctcgcgaagaaaaataatcctatttga  
ccgtatacattgctagcagcaatagaataatcgggaattccgggtaaccggccaagctgctaaagtagctaaagtagctataaactctgcaataaaatagat  
cctaatgaaagccatcattccaatctcagtgaaattgaagacatctatccatttagaatccttttaattggattaaggatcctccaattggaatgataacag  
aatgcataagctattagaaggaatttaataaacaaatagacatagataaccacacgattttgttcccctatgaggtaaaaagaaatgaacccgcaaatat  
cgcaaaaacaagaatttgaaccaaggaaaaagactcatgataaagtgataagacaagatagtttaccagaaaagcccgtgctcattttttagcaca  
ggctctctcggtaaaaggaatcagacgattcaagtggaatttttgaacgtatcaataagataagccatgctcgggttctcaggtcttaataaacgggac  
acttaaaaatctgttggcagcgggattcgcacatcttacaaccacacaactctcgttcttggcgcggaagcaatttctgttcttaccatccaaggtatca  
tttcaatacatctgttggacaagctcgtacacattgagtcacatctatagatcataaattttacggaaatgtgacattggatctataaatttctttcaacataaaaa  
tttctgatctgttcaaaatgaaattagctactatatacaatcaaatgattttagacaccagacgaagcaatggttatcaaaactcaacaaataatgcaatataatttctaat  
ccgtttagagaagcatgaaaagagccaagagacttattttgggcttcaacaatcataattatagcaattgtatatacgaattcgaattagccaataaattggctatc  
gcttttcaatataaatttgaatattcaattgcaatatacaatgaaattgcaaaaattcaactaagtaaaaaaagaactatggaataactactcaaaaatagatattc  
tcaaaataaataatgattcatgtaataattcattattatattatgctcccttgtttagaagattctatgctaaatttcaaaaatagattgattgatacagattgattc  
ctattacgatggatggaagaaatggataatcfaatgctgctcagcagccgcaagggtatacaaaaatgcaaaaatgctcctttaaattggcgctatca  
aatagatcagaaaatgttacgagatttagattaattgaattcagataagttcaaggcattatagactcaaccatgttctggcttctgatcaatccatagataccaatcg  
aaaaataatagacactcaaaaaagtagatgctcaaacatattaactaactcttataatctcgattcattcaaatggggacaagaattgaaccgattgaattatt  
agaatagaacaattacacaacaaaagagaaaaagaggtatttggcagtagatgggttactaaatcaaaattgtggttctttagtatttttagatttgaattct  
tataattttagctcattcaagtatttctattcggagccatagtaattgacacttaaaagaactagaagaattatgaaatgagttcaaatggaagataaaaatcggft  
gctaaatgaatcccaatttggtaacggtattttagagaccctgttctactatttgggttctgtatgctcaaaagaattccatcattgacgattcgggatagtatcatt  
agtgaaaaaggaatgattatacaaacgagtgaaagtgaaccacatcccaatagtcacaaaattcttctttagaccattctgaccatttacgaacattacggcaaat  
gatcaagacattatagctcccacataaataagaagttgtgccacagctacaagtaggaattcaataaataatagaaatgatacaacaagaactaatcctag  
cgaaaaagcagaaaaagttgggttggtaagtaataaccaccctagacccttagtagaagaacaatccccaaatagcacaagaatttctattggccaggt  
aaatccattatgataagaagaataatagataaattttctatgaactgactaaaactaaaagattcaaggaagaaaaaaggattaggaattttttgtatattgtat  
ataagttcttctatagttagaatcacatcagaaaatctactctggttfaaaatcaggaataattgcaataagcagtaggtattcttttcttctatgtagtaaaagact  
tttgatttcaacaaaaaattctagtaatcagtaatcgttctgaattccaagatttttctcgtctatttactttgagttgaattcctaattgttgaattgtgtaatctccatt  
atggagattgtaaccgactcaagcaatttattgtaattcaatcagacgatcataagtagaaggtcattcttctcagctattgataaacgatttctggacagctact  
caacacaattaccacaaaatatacaaaactccgaaatcaactataaataagcaattgttctttaaatacttttcaaatcccaatccacaagaggtatgactatagg  
gcatacgcgaacacatactcacaagcaatacattatcaaatcaaaagtgattcggccccggaacgctccgatgtaattgattttctataggggtatgtaactgta  
taggtaaacgatttctgtgggataaggaattatgaactttgaccaatgaccttctgctgcgctatttgggtgaccataactatgaaccaggtaccataggggaaca  
tattcgaatatctatgaaaaaggtatttcttcttctgtttagaggacttttgggtgaaaatattcttactgtattgtattatcttattttagatgaaacaagttgggaag  
aagttgtaataagagattgcccagggaataggtaaaagaatttccatccaagatttaataactgatcattctcatcctgggtaaaagccatcttattgtgatagaa  
tgaagagaataaataagctttatgtaattgataaagatactattgctatttcaaaatccaaccattttattcattggaaaaatccaaaaaaggatataagggaata  
gacaaattccccccgctaagtagagaactgttcaaaaagaaggaactaataaatttagtaagaacaagataaaaataaacattttgataccagaattctg  
gtttgataacctgctactaattctctccgcttctgtgtaaatcaaaaggtaattcttcaattccgcaaaagaagaattagaaaaaccagaaaactataggtgacg

ccaagattccatccaaaaaacatatttggactgtcctcaactafatcaactgfacttgaactgttgataatcatagtcgacgataacatcacagttcccaccgcta  
ttccaaaaccgfacatgaaaccttagttcctacagggctcctctatgatcagaaaaaggaaagfactgttccattcgttattatcttctgggcgtagtgagaatfctaa  
gataaaatcgattcaacgctcctaatagaccaaaaggaatctgtctgctagaataataaaaaacgctcggaaatcatctcatctttataataatggtacttttctt  
gttcagcaataacttaacttgggaataaaacactcgtfatacaatfaataaacgaaaagagttgggtattgctatgaagaattctgatgaatggataaacgacg  
gaaagaataaataagatcttttttggattgcaatccatctttgtcttattcttccccgagggtatttaaaaaaagaaaggaataaagggttaatcgttctg  
atagccatttcttaacaagtgaaatgggaacatactggaatccgaaagaagtaactactgctcattccaccaattcaagctcttattatgattcctttatgag  
gaaaaatataatgcttttagattccctcattactaactctttatgacttttagtgttcttaactcctcactaactttgatggattcccttatgattacaactttctgtatcggga  
atcccttatttggccgctcaagatagatgactaatcaaaaaatcaaccttggggtaaagaattacaccgcttatgttactccatttttctgtacataggaat  
gagatttttcttttactacaataaataagcagttttgttccactatagctatctgttfaactfactaacctgaatatagaataagaaaggagataaataatcgaat  
aatccagaggaataatcctttaaagaatcgcacgtagagatattgctagtacaaaaagtaattgggattccataactaataagattgagcggcagctcgtag  
accacctgaaaaagaatatttatttggagctatctcctgccataagaagaccaataggagcaacttgaatggcaatccataaaaaaacaccaataactaagatcc  
gctaaaaacaagcgatacccaagggaataactaaaaactaataaaattgatagactgctatagacggctcaatgctaaataagggaaatccccctgggatgg  
caagatataccttttaaaagtagcttagtccatctgctatagcttgaagcagctccagggggccagcattatcaggaccaatacgttgggtatcgtatcgggatatt  
cttcttaaccacacaattacgagacttctattgtattcccaagaaagggtaaaaatgggtagaatccatatacagctcattctttaaataatccaagttcga  
aaaagaattgatagcttctacgtaccctgtctattatcattcaacgatcaacttcccataatgatactataactcaataatcgtatgatacgaacttccatttt  
ttgactagctgaggaagaatttgcataaataaaaaccgggtgacgaatfctcctccaggggaaaagactatctcctaccagataaattcctaattcaccit  
gggctccactctgtcataaagctctgtttgacaattcaaaatgggtgaaaggttttaccagaaatcgaattcaaaatcattccattcggaaattcttcttcttaa  
agcctcggacttcaaatctcataagggccccaggaatttttctacagcctgttgaataatttgaattcctcattccaccgattcgtactaataagcgtgta  
gaaatcccccttttggcaattggacttccaatcgaattgattgaaactcgaagaactttacgaagaatccattgattccagaaagctgtaacatggggccc  
gataagcccccaatttcaagcttctccgtaataaaaaccaactccctcaactcgttcaaaaaaatgggattctgtgtaataagttgtgataactaataactcctgta  
aaaaataacacagaatcaaacatttatcgtatccataagggcagatcggcagcaactccctcggatcggaaagtaattatgactcattcgcatacctgtagcag  
cttcaaatagatcatatattaattcctctctctaaaaataaaaaaaaggagctcgcaccgagatcgcataaaaaggccaagccataacaagtgagaagctat  
acggctcaattcaacataattaccctaataatagctggctcttgggggtatttgaatattctcaagaattctggtcattfaccgttattgcttctgtaacatagtagctaa  
ataatccaacgctgtacataaggaatgattgataatgctggtttccgcatfcttctctgtgtaaatagcctaataatgggtcacaatcaataacatctca  
ccatcagagataacgatcagcgaagaacaccatgactgaggggtgctgaggccatattgactatcagagatcttcttgaagcggtagactcatactcttct  
tcttaattcatttccatgaaaatggatttccatgaattcctcaaacgaggtcactcaaaatgcaaaatcaagactactataagactactaataaaataagaaaa  
aaaatcgaacgatgaattaccgctccctaatacactgactgattaattcttataacgactctattttcttggcaataagccagcaaacgtgacgtttccca  
aaaagctcggagaccttctccgataaaaatcttttgttaattcaaatgtaagcaagctccgatcttattggtgaaactgaacttgaattcaacagaacc  
ccagtttcttcttcttcttcaaccataatcaaaaattttctacctcttcttttcatgattttctgatcaggaaaaataaaaatattgcaatttttgaagtattct  
aatctcgtacacacaaaaattgcaattatctactactggaatttggatttatttatcgtacaaattggaattgatacaccgtttaaattgatatcatttagcaaaatgaacatagcat  
atgcatccatcttccgctcagaaattccagggatagagatattgtataagaataagcattaaagtaactcaaatgaatttggatacattcttattttagatagaag  
aaaagttctctatcaataaaaagaatttggctgatttatttattgctatcaatttattggaattgatacaccgtttaaattgatatcatttagcaaaatgaacatagcat  
atgcatccatcttccgctcagaaattccagggatagagatattgtataagaataagcattaaagtaactcaaatgaatttggatacattcttattttagatagaag  
gaacaactgccattatcgtacaaaccaatagcattcacaagttaaatcttaatacaatggtggccaataatgaatttttgcataatgattaaagacgcttggc  
ctgattcgaatttgcagagattttttagtatttctcattgcaaaatgatggatctcctccgtaactttcaattacgagtagagaattgaaagacatgaaaattcaca  
ttctctacggcgtcagagatagatagaatatttccaggaacaagaaaaccagaagaatcttctctattcactaccattccgctcctcacttatttagtttctt  
ttcttaatgcaatagctatgattgatagaatccatttctcaaaatgaaacatttctttaggaaatgggtcgaataatcgtattccacttttaggtatcgtgaa  
aagtatacctgtgaagatcgtcatttcaatcagatccggtttttagtccatgataaaccattggatggatctccaccggttagtaagaagaatag  
atgcaaggtgataatagatcagatgaagatcagagctgcccataatgaaccaccagagctcgaatatacctcttccctaatcaagattggagaaaag  
aagatcaagagggaccatggagaatggtgtagaaccataatagagctccgaccgcaacgaccgaattaattcctcctcagaaaacttagactactaagta  
gaaaagattgaaaatcagcagatgggtctctttttcttctttaggtttctatatagcacaatttctgatgttcgatgagaatttctgacttccatataagaaag  
atagactataaatgacatctcttatgcaataagaccaaaaggatggatataatgataggaggtgtaggaaatgaaatagaatgaaatagagccactctggcct  
ctaggaggtcgaatccccctgttctcagtagctcagtgtagagcggctggttcaactgactggtcgtagggtcgaatcctacttggggagatttgaattcattt  
aatgtaagaataaagaattgaattaaaggcttggcttggaccttaggagtaggtaaccggtcgtatccttgttctattgcaattatctcactgatacattctgttcta  
cgattccactcgcacaaaaggaaagacatacccaagttcaatagctttacgtccgctatccgatcatttctcactccaggggaaagtaaaaggccctccc  
ctttgaaagctgtggcagagggattcgaacccccgacaccgtggtcgtagccactgcttaactctctgactacagggccaccctcctcactggatc  
tctcccgggggtacccccaaaaggaaacctcctcctcagccatttcaattcgggttaagaagatgggaaagcccccttctctataagaacagtgcttccga  
ggtgtgaagtgaggagaggggatgtgatgattgaggtttgaaagacgaccttgcatttggattggatctttctgatttcaaaatagtaaaaagtcataaa  
gaggtgtaagcttttattcattctggcagcagctattttcccgaggacctccctacagatcgtaccgagtagagtttaaccaccaaatcgggatggattggt  
gtggttctctacgctagaccagaatacgaacctgaacgaggaagcagtagagaaatattgctagtaattgtgaagccccattctgactggaagg  
gacacaaaggcctctgcccctctctatctatcaagagatggaagggcagagcttttttggttttctatcttctcaaaagattgaaacatgaagatagatg  
gcaagtgcctgactgattgatcagctcgttaggaacaaggttcaaatgttctgtagtagctcagctgcatacactgacttccacttgcacacattt  
aaacggctcgtctgccgctacattatctatttccatgcttctgctcctccatccccgatgggtggagaaccgctcgtctcggctgtgctaccggagccttag  
ggaaagtcggagagagagcactcatttgggtgggttactactatattgcttccagcagttatcctccgacttggctaccagcgtttaccgtaggcacgata  
actggtacaccagaggtgctcctcccggctctctgactagggaaaggtcctcctcaatgcttaacgccacaccggatattgaccgaactgtctcagcagctt  
ctgaaccagctcagctaccgattaatggcgaaacagcccaaccttgaaccacctacagctccaggtggcgaagagccgacatcaggtgccaaccttcc

cgctgatgtgactcttggggaagatcagcctgtatccctagagtaactttatccgttgagcgacggccctccactcggcaccgtcggatcactaaggccgactt  
tcgtctctgctcgacgggtgagcttgcagfcaagctccctctgctcttgcactcagggaccaatgtccgtctgcccaggaacaccttgcacgctccgttacctt  
ttgggagcctacgcccatagaaactgtctacctgagactgtcccttggcccggggtctgacacaaggttagaatccgagctctccagagtggtatctactga  
tgctcggggccccgggaaggggcttctcgcctccacctaagctgcgcaggaagggccaaagccaatcccagggaacagtaaaagcttcatagggctt  
ctgtccaggtgcaggtatgctcgcacatcfcacagacatgtctatftaccgagctctctccagacagtgcccagatcgttaccccttctgctgggctcggaaactacc  
cgacaaggaattctgctaccttaggaccgttatagttacggccgctcaccggggctcggctcggccgctccctgtcatcagttcaccacttctgactccg  
gactggcagggcgtcagccccatacatggtcttaccgttgcggagacctgtgttttggtaaacagtcggccggcctgtgactgcgaccccccttctgag  
ggggcacccttctcccgaagttacggggtatfttggcaggttcttagagagaggtgtctcgcgccctaggtatftctactaccacctgtgtcggttcgggt  
acaggtacccttgttgaaggtcgtcagctttctgggagatggcatgggttacatactcagcggcgtagcgcctggatgagcctcgtggagaagcaatgg  
ctagtcacggggctcatactcagcgtcagcgttggactcggacctggctcagggcattttctacccttctaccctgaaaagcagggcactctgtgt  
ccttaaacctataaccatcttctggctaaccctgctcctccgctccctccgtaccaacaaggggtagtagcaggaatattgacctgtgtccatcactaccgcttccg  
ctgactttagccctgactcaccctccgtggacgaacctgtcggagaaacctgggtttcggggcattggattctcacaatgtttcgttactcaagccgacttct  
cgcttccgctcgtcagccccgcttctcgggttctcctcctaagggcgaacctcctccctaccgatctttgacatcccacagcttcggcagatcgttagccc  
cgttcatctcagcgaagggcgtcgtcagctgattacgcactcttaaaaggggtgcttcttaggcaaacctcctggctgttctgacccccacctctt  
tactgagcggctatttagggccttagctgtgacgggctgttccctctcagcagtaagcttaccctcagctcactggccacctgacctgttatttt  
gggtcatatctagatfcaaggttgcctcgttgggtaccgctcgcgacccgcaccgaacagtgcttacccttagatgtccagtaactgtcgcctcaac  
catttcggggagaaccagctagctctgggttcgagtggaattcaccctaaccaactcctccgtgattctcaacatcagtcgggtcggacctcgttctagttca  
tccaaagctcctgctcatgtagatcaccaggtcgggtccataagcagtgacaatcgcctatgaagactcgtttcgtacggctccgggttccgctc  
ccttaaccaagccactgctcatgagtcgcccgtctcattctcaacagcagcgggtcagagatacttccctccactgcttgggagctcagcagcgtttcac  
ctattcactaccactgggggtcttctcacttccctcaggtactactcgtactcggctaccaggagatattagccttgaaggtggtccttctgattcacacgg  
gattccacgtgccccactcactcgggtcagagcgtaaagtagtgatgcttccgctactggactttagccatctaggggtcggcactcaaccgcttccctagcag  
cacaacgctgtattgctctcccacaaccctgtttcacggttaggtgctcctatctcgtcgcctactacgggaatcgttttcttcttctctggtactaag  
atgttcagttcggcaggtgtctcttgcctgctcatggattcagcagggacttcaaaaggtgacctatttgggaatcctccggatctatgcttatttcaactccccgaag  
catttcgtcgttctcactcgtctctggtacctaggtatccaccgaagccttctctttgaaacctgccattaacgtaaggtatgccatcctaaggtg  
ctactaaatggaagatcttacaagctcatgaatcgaatcatagatgaactgccgaattggcaaaatcgtgctatcatagatccgtaagttcacgggctg  
gagataagcggactcgaaccgtgacatccgccacagggtaaacaccgctctcagggctccccgacgggtctaccatagaggcaacgatagacaataact  
ccccccgaacacagcttacaacttctcgtactgtctcctcaaaagcaactcttcaaaatcctcaaaacaaaaggtgctgagttggaatcccattcaaggatt  
cttgggttccggggaatccagctacaggagaaccagggaacggggagctctcccccttctccgaccttctgacttaactaaagaatgctgttttaagaacga  
gtgattgcccttctccacctactcctcaaccggagagcggacggcctaattgttccactattgaacagggctctatgctcgggtccgtgaccttggacggcga  
ggcgtccttgggtgatctcgtatctcaggggtgagataatgggtcggctcatttctctcttggccacttctcctcaaaaggttgaagggagatag  
tgcataagctattcgaagggccaactgacctcttcccagggatccagatgagggaaagcctagagagcggcactccaactatcgtccatgtacgatcc  
atactagatctgaccaactgcccactcactcctctactcttcttggacagccacttcttctcagtagagctttcagtgccatgttctcactcttcccactactaga  
aaaagtgagccaccggtcaggtacaagatactaccattaccgctggacaattagacagccaaccgtaatcgaacgaccaattgcaagagcggagctctac  
caactgagctatatccccccgagccaagtgagatgcatgaaaagtcagatgcttcttatttcttccctggcgcagctgggccaactctggactgaaaccagag  
acctcggcgtgaaagtaaatcctcggcctacgatccaaccaattgggagagaatcaatagactcctttcgggagcgattcactctcccgaacgcagcatacaac  
tctcgttctgactcgcctctcaagtgtgcttcttccccttctccccttaccatggcaagcttgggaaataactccgatgggcagaaaaaggaagcgttaagaga  
ccctcctggcccaacctagactcctaaatccttttcaaacctgctctgctccattcagtgcaagagatagataaatagccacatcccattgactgacgagg  
gcgctcgtatgacttagggagtcgaagaccaagaagtgcttatttataccaagcattcctcttagctagatccaactcctggtccctcggaaaaggaagaa  
aatttcagcttcttccaggaaggggaggtatgggaaagctctattgattgctgttctccagaccgccggaaaagcagtaaaaaaggtcgaatggtacgat  
ccctcgtcaccagaaatgaaagggatctcgtatcttctgctctggaagatgctgtttaggtgctcatttctccattgaggacgaacctcaactctgtcctga  
gagatagtctcctacactgataagggatgtatgattctcgaagagagggagccgtatgccccccggaccggatcccacgagtgaaataaaagt  
tagatctacatgggatctcactgaatcgcctcctctcctctgaggaagagttgtttgtttcaaacctccgattcaaacaggaggtacgccatgctaattgtc  
cttggatgactccacatctcgggtcagggcgtgtagcacttgaactatccatgtggctgagagccctcacagcccagcacaacgacgcaattatcaggggc  
gcgctctaccactgagctaaatagcccgtcgcggcggcctcccttgggagggcctgctacgcaaaaagcgagaaaaactccatcccttcttcttggatccccatgc  
cgccacaccacacgggggggcatggggacgtcaaaaaggggatcctatcactatcaactaatttctccgacctagataataagctcatgactgttctactt  
caccctaaacgaaagagacttccatcatcaagtttagctcagacgtactccttcttggcgtgaaagcagtgcaaaccaaaaataccaataagcataagcatt  
agctctccctgaaaaggggtgatccagccgaccttccagctacggctaccttcttactcactcactcagtcgaaagcctagccttaggcatccccctcttacggt  
taaggtaatgacttcaaacatgccagctctatagtgtagcggcgggtgtgtacaagggccgggaacggattcaccgctgatgctgaccggcgattactag  
cgattcctgcttcatgcagcggagttgcagcctgcaatccgaactgaggacgggttttggagttgactaccctcgcgagatcgcaccttctcccgccattgt  
agcacgtgtgctcccagggcataagggcatgatgacttggcctcactctcctctccgcttaacaccggcgtctgttcagggttccaaactatagttggc  
aactaaacacgaggggtcgccttgcgagacttaaccaacacttacggcacgagctgacgacgcatgaccactgtgtccggttcccggagggcacc  
cctctcttcaagaggattcggcgtatgcaagccctgtaaggttctcgttctgactgaattaaaccacatgctccaccgctgtgctgggccccgcaattctt  
gagttctattctgcgaacttcccagcgggatacttaacgcttagctacagcactgcagggctcagtcgcacagcacctagatccatctgtttacggcta  
ggactactgggtctctaatcccttctcctcctagcttctcctcagtgctcagtgctggcccagcagagtgcttccgcttgggttcttccgatctcaatgact  
tcaccgctccaccggaattccctctgcccctaccgactcagcttggtagttccaccgctcctcaggggtgagccctgggatttggagggcacttgaagagc  
cacctacagacgctttacgccaatcattccggataacgcttgcactctgtcttaccggtcgtcggcacaagagttagccgatcttctcagataaccgctatt

gtttcttccgagaaaaaggtgacgaccgtgggcttccacctccacgcggcattgctccgfcaggctttgcccattgggaaaaatcccactgctgcctcc  
cgtaggagctgggctgctcagtcaccagtggtgctgatcctctcggaccagctactgatcgccttgtaagctattgctcaccactagctaatcaga  
cgcgagccctcttgggctgattctcttttgcctcagcctacgggtattagcaaccgttccagttgttccctcccaaggcgaggttctacgcgttacc  
accgctgccactggaacaccactcccgtcactgcatgtgtaagcatgccgccagcgttcatcctgagccagatcgaactctcatgagttcatgttg  
cattactatagcttcttattcgtagacaaagcggatcggaaatgtcttctcccaagataactgtatccatgcgttcagattattagcctggagttcggcaccag  
cagtatagccaacctaccctatcacgtaatccacaagcctcttaccctccgtcgtatcggcgggggagtaagtaaaaatgaaaaactcacattggg  
ttagggataatcaggtcgaactgatgactccaccagcgaaggtgacactctaccgctgagttatccctccctccctcagaaaagaaatgaatcgaatc  
ctaaggcaaaaggcgcgagaactcaagccaccttctcgggcttcttccacactattatggatagtcataaatgggaaaaatggattcaattgtcaaccgg  
tctatcgaaaataggtgactgattcagccatagcacatggtttcataaaatctgacgatttccgatcctaaatcagcaggttccatgaaagatctgt  
tcagcatgttctatcgactggtaggaagaaccgactcgggtattcttaaaaaagagggaagcagaaccaagtaagatgatagggtcggccttcttct  
ggcctcaagatctaccattccgaaggaactgggctacatttctcaatttccattcaagagtttctatctgttccacgccctttttgagacctgaaacatgaat  
ggcaaaatcttctcttaggaacacatacagaagaaagataatgtagccctcccaactacttcttcttcttcttcttcttcttcttcttcttcttctt  
ccgagacagaatctgaactgctatccttcttcttcttcttcttcttcttcttcttcttcttcttcttcttcttcttcttcttcttcttcttcttctt  
gccagaatccatgttccatattgaaagggtgacctctgtcttctctcatggtacaactcttcttcttcttcttcttcttcttcttcttcttcttcttctt  
aggactggtgccagctcagcggaaagaaactcacagaccgggctcgtactaataagaatgactactaactaataataatagaaaatgatac  
tagaaaatgaaacgaactaataatagataatgaaatgaaaagaactgtcttcttcttcttcttcttcttcttcttcttcttcttcttcttcttctt  
tataatgataccttcaacacacataggtcagcgaaggtctcggacgactcacaagcagcgaagccagttagaatggattcttattgaaaggtgcctaac  
cgcatgataagctcacatcaaccctcaatgtgactgagtagggatagagggaaggggaaaaatcgaatgaaataaataaagaataaaagcaaaaaaaataagtc  
aaaggtcttcttcttcttcttcttcttcttcttcttcttcttcttcttcttcttcttcttcttcttcttcttcttcttcttcttcttcttcttcttctt  
gaagatagaagagccagattccaatgaaagaatgaaactcgaagggatccttcttcttcttcttcttcttcttcttcttcttcttcttcttcttctt  
cttcttcttcttcttcttcttcttcttcttcttcttcttcttcttcttcttcttcttcttcttcttcttcttcttcttcttcttcttcttcttctt  
tcttcttcttcttcttcttcttcttcttcttcttcttcttcttcttcttcttcttcttcttcttcttcttcttcttcttcttcttcttcttcttctt  
ctctgatcgttctctgtagaggacaggaagggtgacttctctgacttcttccactatcaacccccaaaaaaccactctgcttcttcttcttcttcttctt  
attaacctctggttgaatcactgcttatactctggttcttcttcttcttcttcttcttcttcttcttcttcttcttcttcttcttcttcttcttcttctt  
gagatacgcattatcaggagccctagatgctctcgcagtaaaagcgtcaacaaggcgttcttcttcttcttcttcttcttcttcttcttcttcttcttctt  
tgccatgtgaatcgtagaacatgtgaaggtatgctaacccaatacgaaggttcgtaagggactggagcaggctaccatgagacaaaagatcttcttcttct  
agagatcgtatcggaaacttcttcttcttcttcttcttcttcttcttcttcttcttcttcttcttcttcttcttcttcttcttcttcttcttcttctt  
gaacaggtccgagcaaatagcaatgattcgaagcacttcttcttcttcttcttcttcttcttcttcttcttcttcttcttcttcttcttcttcttctt  
tctagcgggaaaaaggaggaaacggatacctaaatgtagtaaacgaattcctactctgactcctatagatccctatagaattctgtgaaaagccgtatc  
gaaagtgtatgtagcgttggaggagatcttcttcttcttcttcttcttcttcttcttcttcttcttcttcttcttcttcttcttcttcttcttcttctt  
aaagaaaacggattcttgaaccttcttcttcttcttcttcttcttcttcttcttcttcttcttcttcttcttcttcttcttcttcttcttcttcttctt  
gtgttaaccgtattatgaaagacggaaaaaatcattggttcttcaaatcttcttcttcttcttcttcttcttcttcttcttcttcttcttcttcttctt  
acgtcaagcaatcgtagtaactccaataggaagtaaaaaaacagacgtaataaaaaaggatcagcgggaaagtccgattgaaataggatctaaacaagg  
aagagcacttgcattctgttatttagaagcatcccaaaagcgtccgggtcgaatatgcttcttcaaatagttccgaattagtagatgctccaagggggtgg  
gggtgccatagcaaaaaaggagcactcagaaatggcagaggcaaatagacttcttgcacatttcttcaatccatgaacagaatctaggtatgtagacatg  
gatccatcctcctcgggaaagaatcaatagaaggagaatcggacgatacttcttcttcaacaacaaaaaggaaaaagagagaaacagaatcagatc  
aactaagcctctcggggcttcttcaagaataagaagaggaactcttgaataagcagtaaggttcttcttcttcttcttcttcttcttcttcttcttcttctt  
caaaaatcgaacaatcgggacttcttggagattgtagcagttactaattcttcttcttcttcttcttcttcttcttcttcttcttcttcttcttcttctt  
agcgttcttcttcttcttcttcttcttcttcttcttcttcttcttcttcttcttcttcttcttcttcttcttcttcttcttcttcttcttcttcttctt  
ggttcttcttcttcttcttcaacaagtttagtaataagcataacggccttattgttctcagtagagagaacctaafatgcttcttcttcttcttcttcttctt  
caacgaacttcttcttcttcttcttcttcttcttcttcttcttcttcttcttcttcttcttcttcttcttcttcttcttcttcttcttcttcttcttctt  
agctactctaggggaaatgttcttcttcttcttcttcttcttcttcttcttcttcttcttcttcttcttcttcttcttcttcttcttcttcttcttctt  
tctacgtctaatgaggtactatgaaataattactcatgggtgggcaagcttcttcttcttcttcttcttcttcttcttcttcttcttcttcttcttctt  
cttcaagaaatgtgaacggtcttcaatacacaatgtataactccccaggaattcaatgcgttcttcttcttcttcttcttcttcttcttcttcttcttctt  
ccttcttcaatggactcctgactctacgaaggagtgtgttcttcttcttcttcttcttcttcttcttcttcttcttcttcttcttcttcttcttcttctt  
cagaagagaaatgctatccccactccgaccaagacagaactttaccaaaaagtattgtatcttcttcttcttcttcttcttcttcttcttcttcttcttctt  
gaatcttcttcttcttcttcttcttcttcttcttcttcttcttcttcttcttcttcttcttcttcttcttcttcttcttcttcttcttcttcttcttctt  
catagtggttcttcttcttcttcttcttcttcttcttcttcttcttcttcttcttcttcttcttcttcttcttcttcttcttcttcttcttcttcttctt  
agatgttcttcttcttcttcttcttcttcttcttcttcttcttcttcttcttcttcttcttcttcttcttcttcttcttcttcttcttcttcttcttctt  
aggatagtagtcttcttcttcttcttcttcttcttcttcttcttcttcttcttcttcttcttcttcttcttcttcttcttcttcttcttcttcttcttctt  
cacttaggagccgtgcgagatgaaagctcagcaggttcttcttcttcttcttcttcttcttcttcttcttcttcttcttcttcttcttcttcttcttctt  
ttcttcttcttcttcttcttcttcttcttcttcttcttcttcttcttcttcttcttcttcttcttcttcttcttcttcttcttcttcttcttcttctt  
atgatattgggaaatccttcttcttcttcttcttcttcttcttcttcttcttcttcttcttcttcttcttcttcttcttcttcttcttcttcttcttctt  
caaatgatggatagcaagcatgataacttatcttcttcttcttcttcttcttcttcttcttcttcttcttcttcttcttcttcttcttcttcttcttctt  
gagattatgagattatcacgaaagatccttcttcttcttcttcttcttcttcttcttcttcttcttcttcttcttcttcttcttcttcttcttcttctt  
ctattctgtgtggatggcaagcagccctatattcttcttcttcttcttcttcttcttcttcttcttcttcttcttcttcttcttcttcttcttcttcttctt



cgaaccaagaafaacccttatgtgcaaatatagaagatccctttaagatcaacaattccatgcaattgagatgactgfatgtgatgacatctactatacc  
aggaaatcaatgaacccattctgcaattgctcaggataccctcttttagctgctaggtctattcttagtcaagatccctctfactaacggaataaagaattagtag  
atctgttccgcccaaatgggaaatgggctaggtaataactataatcatggaatcgaactgatcatcagattataagttcattccataccggaccagaccgtgc  
acattcttattatgagaaggggctcattcagcctatggaataggaactctgtttacatagaaatcccacgctcttacttatttagattggaataggatgtaac  
gacctgtttgacatatactctatcttattgggtaccatagcaccctttgggtctctttagtaacgagaaattgattgtacatctttttagttgatacatataaggt  
gtcctaccgataatgcaaacgagctattttagctgctgactcaggcctatatgaccgatcgaactcaagactccaccctttagcatatattccatatacaca  
ttagatagatatcatattcatggaatcgaattctcaagatagatatcatattcatggaatattgactcttcaagatgctttaggtgaaatggta  
gacacgagactcaaacctcgtgtaaaagcgtggaggtcaggtctctcaagcacaatcaggaatgcgactcaatgagcattccccgtagaagtatt  
ccgaaatctgcctgctcctctctcttctgaggtccttaaccactccctgagaaaaggagacagtaaaagccaaatagactaaatatagcctgaacga  
tctaaaaatccctgagagataataataaagaacccaagcagacggatcctactgcaaggggtgcttaagaatccaaaagggtgctcagaagagat  
agatgatcccaacctcttattgtctcgcgtaaacgcttttttagcgcagagaaaagtgtactacgaattcccccttttgttgcgaatccctgtttgatcttgagc  
gcacgccataagtagcgaatcgaatcgaacgatcccaataccgtgaaagagaaactcccgatccagggaagcttataaagggcttcgacaag  
gggttttattcttcttgacaaaaagataagatcgatagatcgaaccgaattgcaaaagtaactactatgccagcccaatcatgatcttccaacttg  
atttgttctctcgcgaaaatcgcgattgcagagatgagaacctgaaagcaagatcccgaataaagaaacagaaaccgaggaaccacaagagtgaact  
agtagagctctgcttttctcttctgctcctttactcaatgattcctgcaattcccgaacaaatctatgctattcatagggcctcgttgaagtgtacaa  
gatctagtcactggaactggtttagaccgcaatcctttagatggaacattgcttttcaagtaaaaccccagatataaagaatgaaaagggtgttctg  
tctttcttggaataagaacccctgacttaataaaggaaataggaattttttaggtatttaccacaatagatccaggttgggaataagtgatgcaaggaat  
aatcccgataggcgaacgaaaaggtttccctgagatgtaaaacgaaacgattagcccatacagaggttgggaataagtgatgcaaggaat  
acgtctttctgtaaaaggatcttataaacataatctattagatcctgttcaatgtaactagggtatcataagtaaacggatcccgggttcaatccttgaaacc  
aaggctactcttctgtaaaagagaatgatcactatgagtcagactcaatagaattggaaccattccaaatagcgagaataggatttggatccctctcaatctcttct  
aatcaggatccagagaggttttcatagtcactccgaatattgccatctcgaatatttctgattcatttttctatgatattgtcttctatagaaattggtatttacc  
atgtacgatgcttctgtaaacatcagctgaatgtaaaagcgcacaactcataatgtaaaattgctgggtcaattctgctgtagcagcgaaccggaac  
gttcataagctattggaactgctctatccatggaatctatccatcacaataacgaattggtatggtatattcataccataacataagaacaataaagaact  
gaattctatgatactggaactcagagcagataggggaagtcgalltatggatggaatcaaatcgcagatttacagaaaaagcttctgtttatgggaaagaat  
caatatactttaaagtcgaaatcgggactcaagacagaataaagcattgggctgaactcttcttgggttaaggttagctgtgaatagccatcgaactaccgg  
aaagggtagaagaatgggcccattctaggacatacaatgactacagcgtatgatcattaccctcaaccgggttattctattccactctagatagaaaaaac  
taaaggagaacttaataatcgcgaaacattatatacaaacacctatcccgaacacgcgaagggaacctagataggaagtgaaatccaatccacgaaata  
atttgatccatgagcggcaccgttggtaaaagctgtaattccagaggatcattaccgcaagcagataggggggaggtcataagccctataccgtaaaatcga  
tttctagcggaaatcaaaagacatatactgtgtagaatacgaacctagaaatcgaactcaatgaatgcgtacattgtctacatacattgggaggtggaaggg  
atatattatcatcccagagggcctataattggagatactattgttctggtacaaaagtctatataatgggaaatgcccctaccctttagtgcgggttgactattgatt  
acgtaattggaagtaaacatagggttaccgacgaacactgaaatcgaactgatcactgatcaattgactaccttacgggatagacctcaacgaaatctgtgagtaa  
cggcagcaagtgattgaggtcagtagtctcatagaaaattattgactctagagatattggaatgagaagacaaaattgttgaaagcacgcacagaaccgga  
gcgccctgttcaaaagagaggagcgggtattcacatfataattgatgctcagagcgaattgaaagtaagcagtggaattaaagccccgggggaaaata  
gggatgctctacgttaccataatagtagaatgatcgaatcttatagatcattcgaatgctacatgaagaacataagccagatagcggaaagcgg  
agacctaggtatgagaatcataacatgagcattcgcgattgggttctctatataccactcatgttgaactcatalacgattcatataagatccatctgt  
ctagagatgctatatacctagaaaagcctgtcttggaaagctgtacagttgggaaaggggtttttgagagaaaagaagaatctactcaaccgatagcc  
cttaggcacggccatacaatagaaacacagcgtggaaggggtggcaattagctagagcagcaggtgctgtagcgaactgattcgaagaaggtaaat  
cggccactttaaagattaccatctgggaggtccgttggatcccaaacgcttagcaaacgctgacaagtggttaattgttgggtgaacaaaaaagtgtggg  
agagccgggtcgaagtgtgtaggtaaacccccgtagtaagaggggtatgattgaacctgtggaccaccccatggggcggtgaaaggaagccccca  
ttgtagaaaaaacccacaacccttgggttatctgcgcttgaagaagaactggaagaaagaaaataatagtagatgtttattcttctgcccgtaaagtaaat  
acgtaactaggaataggaatgcaatgttggatgcaatagggatggcgaacgaggggaattgaacccgcatggtggtggtcacaatccactgcctgga  
tccacttggctacatccgcccttaccagctaaaggatfctcttcttttccatctattatcttattctgacctcactcgaactgagatattggacatcgaatgc  
cactctttaaataaggaaaaaggagtaactcagctgtgacagaaaaaaaacgaatccctttagtctacatcatttggcaaaaatagaaaaggtcaatagaaagg  
aggagaagaaacaatagtaacgtgtgctccgggcatctagacttaccgcaatggttgccataaatcgcgattcataatgaaaggaacatatacctattac  
atacaaacctctatgtagtgcgaaatgggggaattcgtaccaactcggcattcagagttatgaaagtcaagaaaggataactaatcctgctgtaactgaatt  
cagaatagaaagattcaaaaataaaaaaaagaaata

>O.rufipogon\_AC011002323\_cp

ccaataatctgctgaagcaagatattgggtattctagcttcttctcaaaaattgctatatgttagcagaaaagccttaccatfaagagatggaactcaagagca  
gctaggtctagagggaaggtgtgagcattacgtctgctacttccataccaagattagcaggggtgatgatcagcccaagtaataaacgcacctggctat  
caactacagattggtgaaatgaaatcgttttagattgaaagccatagtagtaatacctaaagcagtgaaacaaatccctactacagccaagcgaagaagaag  
tgtaaaagcagagattgttaaaactagcattggaagtaaatcggcgaataaacatgagcgccacaatattataagtctcttctcttaccacaaatctgtaacc  
ctattagcggattcgtttcagtggttccctgatcaactagaggttaccaggaacatgcatagcactgaatagggaaccgccgaatacaccagctacaccta  
catgtgaaatgtagcataaagattgtctgctcctggaatacaatcataaaggtgaaagtaccagatattcctaaaggcacaaccatcagagaactccttgacca  
atagggtaaatcaagaaaacagcagtagcagctgcaacagagctgaaatgcaacagcaatccaaaggcgcataaccagacggaaactcagttccactcag  
accatataacaagctacacaagtaagaaggtgtagaacaattagctataagaccgattgtataaccactcatcaacagatgagcttccaaattgggtaaa  
agtgaatccgatccgcagaagtaggaatggtgaccagagataatattttccgtaaaagtaaaagaaaccagaaacaggctcagaaatccatcaatctact

ggaggggcagcgatgaaggcgataataatacagaagttgcggcaataaggtaggatcatcaaacaccgaacctccgatgtaaacgggtttcgggtcga  
gttatccagttgcagaagcgacccacagcgtgtacttccgctctctaaatgacagtcagtgtaagatctgtttattcaaatgcaaggactcccaagcacac  
gtattaactagaaaataatgaaggctgttttaacagtataatagactatataccaatgtcaaccaagccagccccgacagttgtatatacacaacaaatft  
accaaaccaaaatftgtaaatgaagtgaagtgaaaaatcaaaactcagattgctcttctagtttccataggggtgcccgggactcgaaccggaactagtcgg  
atggagtagataatfcttctgttacaatagagaaaaacctctccc aaactggtcttccattttcattgcacacgacttcccattgtagaataaggctattctattcc  
aaagaggaaagtactaatttttttagtagtaagttgattcactactatttattatagtagacagagaacatttcagaatggaactgtgaaagtttacctgatcattatcaa  
tcattctagtttattgtttgaatgattaatgaaggattcaccagatcattgatacggagaatataccaataccaataacgctcactgtgcgatccacggaaaga  
aaagtaagtgtttggcgaacatcaagaaaaaactgctcttctcgtaaaaaattcttcaaaaataccgaaccaaccattgcataaaagctcgtaccgtcttt  
atgtttacgagctaaagttctagcgcgatgaaagtcgaagtatacttttagtcgatacaaaagcttctttttgaaagatccactgtgataatgaaaagatttctacatacc  
gaccaaaccgatcaagaatccaatccgataaatgggtccaaatgtttactaataggatgccccgatccagtaaaaattgggcttttgtaaaagatccaatga  
gaggagtaaacagggactttggtatcgaatftttcattgagatctattagaatgaattctccagcattgattccttaacaagaatftattggtacactgaaaaag  
acccagaaaaatcgaagcaaggtttgctaattggttagatggatccttgcggtgagtccaaaaagagaagaatattgccacaaacggacaaggttaacattc  
catttcttcaaaaagaggtcctttgatgcaagaattgcttcttctgatacgaacataatgataaggggatccataacgaaccataggtttccgaaaaaaa  
gcagggtacataacccaaaatgtccatcttctgaaaaagatgattcgttccagaaggttccggaagaagtaatgcagcaagaagattgtttacgaagaac  
aacaagaaaaatcatttctgatacataaggttataggaaccgaaatagcttttttttttcaaaaataaaatggtttcattgaaataaaaactattccaat  
tcgagtagtagttgagaaagaatgcataaaatgcaaggatggaacatcttggatccggatfagaaggagttgaaagcagataccaatggatagtagaggatt  
tctatattgctgataatgtaagtcaaaaattgtcttcaaaaaggaatattgaaatgaaatagatcgtaaattcgaactttggtattcttttctccggacaagac  
tgttctgtagcgaagattggatttctacaacgatcgaacccctcagatgaatctggaataaaaactcagaataaaaaaattgttgaatccaataatcgtacttg  
gttaggatgattaaccaaataacccaaaatctgctgatacattcgaatcattaccgtttcacaagtagtgaactaaattctgttattagaaccaaagattcgcaca  
gttcggaccatttaaccataatcatgggcaaacacataaatgactcctgaaagtagtagggtagacgaaatattgtctagaaatttgaatttctgaaataaccc  
cgaattttccatttatttctacttgaatcagagagagaatattctcggttatacaatgggtgatacatgtacaatattgtcagaacagggtgtgctattttat  
acaacccctggggaagaaaggagcttaaccacggatcttttccgctcttctatccaatgtttatgtttgttctaatcaaaaagagaacaaactctttattttg  
caggccaaftgctctttgactttgggatacagctctttatcaatatactgcttctttacacattcaatcacaacatcctttcaatccaaaataagaataatgattc  
taaaaaaaaagaaaaatcaaaaggtctactataggaacacctgctttccctacatcaggcactaatctatttttaacgtctaatagatcagggagttctccaat  
aagaagttaaagctggtgctttttaccagaattggagccaggtctatcattattcattagaccagaaaaatcagaatttttattccattccaaaaatccaaat  
aagaaattgattttatcagacatgctatttttccattacccttgaggatcagtcgctctatagactctaccaagagctggacgaatttttcttcatccaaat  
gtgtaaaagatcatagtcgacttfaaaagccgagtagtctaccattgagttgacacccagataaactaggatcttagatacagcgaatccaaaaatcaatggaatt  
acaccgacacccctgcaaaatctaaaatgcaagacattaaaagaaagattttaccattgaaaacactcagataccaaaaggaacgggtctggttaattc  
actaaggtfaaaagtgccaatcacgatcgtaaaattgctatttttagctttttatttaataataataaataatctgtatgagagtaacaacaagagggacaacc  
taccattgagcaaaagttagcaaaaaaactaataggagtaggataaaagacttatccatcacaatctagatgtcaatggacctttgtcaatggaatfaca  
atgtaagaaaaaattagatagaaaaactcaaaaaataaaggcttatgttggattgacacacataaatccagtcaaaaataggatfaagaaaggcaattatt  
tcaaatagttagacaacaaggatactagtagcctctcctagtttttattcattatgcttcaattaactcaaaagtcttctttttaaagaattccgctccttaaa  
atatcagaacagttctgtaggttagcaccctttcaagaaatagagaatagctggaacatttaacaagtttgattctttatcggatcataaaaactactttcga  
gatctctctctctcagatcgaacatcaatgcaacgattcagatagacagcttattgggatagatgataaaacaagccccctagaacgtataggaggttt  
tctctcatacggctcgaagataatgacttgcattatftccgtacagaaaaacaatftcattatactcatgactcaagttgactaattttgattgacagactgaaagaa  
aaaaactcttgaattttttgagctgctctaaactcttcttccctcctcgaacaaatcacttttattccttaccggtccaattctattgtgagacagttgaaaaac  
gtgttactgttcgggaatccttattcttattgtgaaatcctgggttaaacattactcgggaattctattcttttttcaaaaagagtagcaacatacccttttct  
attccttcgataaagcatttccctctctatagaatcgaatagagcattgattcagatgacttttaatacaaaagatttccatcttccaaaatgacttttctt  
atttaaccctttgattctatatttctgattctatattagggtagaatgacaaagttggcctaatttattagtttcaactaccctgattcttccctgataaaaaataat  
tctgtctctcgaactcctgctactatttacttagcttacttacaacaaccagcgaaaatcgggtcgggacgaatagaacagactatgtagcgaacagagcatt  
ttcattactatgaaaaatggtgtagcaaaaatccacaatcagatcgtctcctcaagtcgacgttcttctaccacatcgttttaaacgaagtttaacataacattcct  
ctaattcattgcaaaagtgtatagggaattgatccaataggtggaatcagatgattcattagtttctgtttttgtataactcaaaactgctttgctatctatggagaa  
atatgaataaaaagaattagttatcgggaaagactccgcaaaagcgaatftatttaaacccatattctatcagatgaatgaaatagttcgaaaaaagggaata  
aacaagttgcttaagacttatttattggaatttccatcctcaacagaggactcagatgatcaatcctgaaatgataagagaagaattgacttctccaacaaataa  
actatcaacctcccgttaattaatttaataatattagattgcaatctattttccataccattttccgtaacaaaactaattaactattaactgtaaaactattgcaatg  
aaaagaaagtttttggtagttatagaattctctatttctcactcgaataccaaaagaaagaaaaaataagtaaaaaaacgacttctgtaaaagtaaaatfaa  
ggcttttctttacttatttttctttacataaaagcaactccaaatcaaaatgaatcattctatctaacgagcagttcttattcttaccgggatgacatttt  
ggatattfaaaaaatcgggatcagatcgtttcgttaaccaaaagaaagaaaaagaaaggaacctttttactaataaaaactataaaaaaattatctctatca  
taaactatctctaccataaaggaaatggtctcgtttttatacaatgttctacgcaagtttaaaatftttcatgaaaaaagattttcaattgactggactgacactggat  
tatgtttctgagacagaaaatgaacgattaggactcagatcaatcaagagttataagagaaaaaattcttfaataaactttatgctctgtagcaatacaaac  
gatttcatcttctgtttcatcagaaaaatcgggacggaagattcgaacctccagtaacgggacaaaacccgctgcttaccgcttggccacgccatttcg  
ggttttatgcgacactaataacagattatgtttattcttattcgtcaatcctacttcaattacataaaaatgggggtattcttctgtagattctagacatgcgaataat  
atagaatcaaaaaatgattgatattacatggaattctattagatattatgaaagtcgaatttctccactctattgagagtcgaatacaaggagattttgtg  
tttggaaagtcggaagaaaaagattttgaaatcctcttttcccttagaaaaataactcaatcaaaatccaattatctactcaagaacgaacgctgtt  
atgcctaataactagtttaacctgtattgttttaattctgttattatccgactagtttttctcgcacaaatgcccgaagcttatgcccatttcaaccaatcgtggtttat  
gcctgcatacctgactcttttctattagcctttgttgcaagctgctgtaagtttcgatgaaatcttactctctgctgcaaaatgaaatctgattcattcaaaaa

aattcgaaaaatggataagagccgagaagtcttataatgaacctcgattctaaaatcaaattctctacattgaatgtatagctgcagcaataaattggatcagcct  
ttactccctgcatctacgttgagcaggtatcttaggtaaccgcacaatacctaactaattattgataagagtgcttattataatcaattctgcaatTTTTTcaaaaa  
ttgattttgcatTTTTggtgtcaaaataaacaaccatcctagtgattgtgtgtaagaaaaacgggtaactattcctaaaaaaatcttgagattatgtaa  
tgctactctcaaacTTTTgttatacagtagtgatattcttggttccctcttattcttgattcttactaatgatccagacgtaactctggcgtgacgagtaaaatcc  
aaaatTTTTctcaaaatggattgttctacacattatctacagaaaaatcggggcagaattcctcaatcgaagtgccaaacgatccggggggcggaaa  
gagagggattcgaacctcgtfacaaaaaattgtacaacggattagcaatccgccgctttagtcactcagccatctccccgtccaaatcgaaggttccgtg  
atatgacagaggcaagaataacgattgcaaaaaatcctcttcttcaaaagtcaaaaaattatattgccaattccatttagttatattcttcttaattgtaata  
aaaaaaagaagaaatcttcttcttcttaattctaaaattggatattggctaaaagacaatcagatagatttctcttagcagcatttccatagacttgtataat  
aaaacaagcaggttatgaaaaaagaaaaaacctTTTTTattattatcaacaagcaaaaaagggtcttatcaaccaaccacccataaaattggaagaaaga  
taaagtaaggacactgactcctgaatgaggccctatccgctattctgatataaaatcgatgtagatgaaattgtataagtgattttttgtattccttagacttaga  
ccagcgaaggcaagaattctcgtctatttactattctatcttctgtactagatgttctataggaaataagaaatcgaaccccttccgctacacataaaatggatt  
cgaagtcattttcttcaatattcttactTTTTTcagaatcctattttgtctataccatgcaatagagagcggaggaaaagagaggttactTTTTTcattttccc  
taaaaaataggcttcttggaaataggaaatcctgaaataatcctgaattcctatagfataagaaaaactaatgaatcaattcatggattaccacgac  
ctcggctgtgacccatagataaaatgcaaaattctatctcagaccattgaaaaaggcattgaacgagaaaaatcgtccacagataatctatgtagcttgg  
gaagtataagagtgctcggaaatggtgaaatgaatggaggatcactatgactatagccctgtagaggtactaaagaagaaatgattattgataat  
ggacgactggttacgaaggaccgtttgtttgtaggatgctcggcctattgcttttctgtgcttattcgttttaggggtgtttacagggacaactttgtaac  
ttctggataccatggattggcgaattctattggaaaggtgcaattctaacgcagcagttccaccctgcaaatgtagcacactttgtgtactatggg  
ccccggaagcacaagggttactcgttggctcaattagctgtcgtgctgctgctgcttctcctccatgggctttgactaataggttctatgtagcaattga  
acttggctgctgttcaattcggccttataatgcaattctactctggccaatcgtttttgtttcctgattcctgattatccactggggcaatccggttggcttfg  
cggcagtttggcgtagcagcgaatttctgattcctcttctccaaggattcataaattggacgttgaaccattctatgatggaggttccggagttatggcg  
cggctctgatgcgctatcattcggggcaaccgtgaaaaactctattgaggacgtgatggtgcaataactccgcgctttaaaccaactcaagctgaagaaa  
cttattcaatggtcaccgctaactcgtttgtcccaaatcttgggttcttctcaataaacgttggtaacttctttagctattgtaccggtcaccggttatggatg  
agtgtattggcgtatcggcctgctctgaacctacgtcctatgactcgttcccaggaaatccgtcagcgggaagatcctgaattgagactttctacacaaaa  
atattctttaaaccagggtattctgctggtggcagctcaggatcagcctcatgaaaatcttatctcctgaggagggttctaccacgtgaaacgctcttfaatgg  
aactttgttttagctgctgtagcaagaaccaccggtttgttggggccgggaatccagacttataatgtcgggtaactacttggagctcagctagcc  
catgacgattaatcgtattctggccggagcaatgaacctattgaagtgcccattcgtaccagaaaaaccatgatgaacaagggttatttactccgactt  
agctactctaggttgggagtagggccgggggagaagttctagatacttccgactttgtatctggagacttcatctaatctcccgactttagctcgttgg  
catttatcacgcttctggaccggagacttgaagaatctttccattcttggtagtggaaagatagaataaaatgactacaattttgggtattcactaattt  
gttaggtataggtcttctcttagtactcaaaagcttattttggcggatataatgatacctgggctcctggggagagatgtaagaaaaatfaccatttgaccct  
agccccggtgtatattgttacttactaaaatccccctttgggggagaggggtgattgtagtgatgattagaagataaattgggggacatgatggttgggt  
tcaattgtatttggcgaatttggcatacttaaccaaacctcgtcagggctcgtcgtcattttagtggcttggagaagcttactgtcttatagtttaggcctt  
ctgctttgttttctgcttgttggttcgtggttcaataatacagcttaccgagtgagtttttagacactactggccagaagcttctcaagctcaagcttactttt  
gttagagatcagcgttggagctaatggtgatctgcccaggaccacaggttagttaaataatctaatgcttcccacgggagaggttattttggagggga  
aactatgcgttttggaccctcgtgctccatggttagaaccttaaggggccccacgggttggactttagtaggttgaagaaacacatcactgcaagaaacg  
acgttcggcagaatataatgacctgctccttaggctctttaaattctgtgggtgctgtagctaccgagatcaatgcagttaatatttctcctagaaggttggtagc  
acttcccattttgttaggattcttcttgggcccatttggcatgcaggaagagccgggctgctgcagcaggttgaaggggaatcgtcgtgatttggg  
gcctgttcttcatgacctcttaactaaatcttattatacctgttctactgttttctgttctgctcgttattctatctagccgagccattccttctatgaa  
agaagataaggggacagaacaaaaaaacaaataaagaacaaactatcaatcgaagaaagagagagaaagcaaaaggagagagggatt  
cgaacctcgtatgtcttagaactataaccggtttcaagaccggagctatcaaccactcagccatctccacagcctaacttatttctcaaaatagaacata  
gccatacgaatgactcactaaccttagaaacatctcaatacaaatcccccttctgatataattctgtatctgtatccatgtatacagatccgctatctctgtgaa  
ataaagcataaaatcccccaacccatatacaataaaaaagtggtgagtaataagtttaagaagaagaatcaatgattcatgataaaacccctcactcttctgt  
atttattacaattttagtaagtgagggatcaataataatgtagtcaacttattgtagtgaacttggagattaagaatagactattgcttccaattagctgttttgc  
attaattgtgacttctcagicttagcttaggtacccttatttcttctctgatggttgcacaacaataaaaacgttatttccggctacatattatggattgga  
ctgcttcttggtagctattctaaattctcatttcttaaatgttttagtatttagtggccgatacaaaaaaaaggccgttattcggattgtgagacgattaaa  
atgcaatttgcgcccaattgattgacagacaattaaataaaaaaagaaactcaatagaaaaatgaacggtcgaaccagacatagacggtcgaaccaggcg  
gatatacctataaaatagagcgtagcagcgtagtcaatgtaaaactctcctgccaaggagaagataggggttcgattcccggcctcgcagccttaatt  
agtaagggtactatgataaaaaatttagtctacttttataaagtaataggtttagtcttagtaccgtacccttactatcttagcccccttgcaccccactcaaaaaaga  
gcactacagcggcgggaatcgaactggcaacagggttccctaaaccgggattcaccgaaacaacaaccagcaaacgctttaaagggaaggagatag  
actgtccttcttctatttattttcttctgcaaggtggggccttgagagtctcttctgttagcaggttactcgaacctgctcaatttgccttatagggcgg  
gaactaatgaataaaagggttggataccgccaaccaccagccctctaccatctagacaaatagaatagcttcttatacagactgtaagtgcggagacggg  
aatcgaacctgacctcaaggttagcctcgtgagctacaaactgctctactccgctctggagcgtggaatcgtgacgaaaaaggttgaatacaggc  
ctctaccatgctagacaaatagaatgattttatagaaatggagcgggtagcgggaatcgaaccgcatcgttagcttggaggctaggggttatagtcgact  
tgggtattattaaactgctcattcaaacgaactgaatatttgaattcattcggctccttattgggtattctcaccactaacatcaagtcagctttttctgtaag  
gaaccaaggctctcgttcttagatgacccataaagtagtagatagaatttgcctaaatctatctaatctacttctcccaatttcaaaagaagatt  
gaaagaaatgggttccaccagctgaaacaatagctgatttctagcaaaccaaaactaccgttttttagctatttggcttccatttctttaaacaagaagatt  
tagttacgattggaataaattttttagtcttctccatagatccttactatattttaaatttgaactccttaactcaatgcaaaattatgcttcgactctgactcata

atccaatcctattgttttggatgcaattcaaftgctttgggtacaatcgcgaaaatgcatattctcctcaatagctattgagagaaaaaggagtaaatcctttct  
aagaactaaagtttcatcggaatataaaaaaccttaaggacgcttaagatatactttcaaatcagttattaatagaacgaatcacctttaccactaaactataccc  
gctacatgtaaatatgataccaacgctaccctttgcaaggtagcctatcagagaagatgctaattcctcttagttaatgaaacagagaaggttctcagattgac  
ggttggctctgacgcgggcttcttactttttttgttcagaattgaacaaagaatttggggaagaaaacatctccccacttatcatgaaatctgggccata  
gagaaagcgtgagatgtttttttatctatagactttccctatggcttgagagaacataaataacttaaaagaaaaggccataggaaccgaaggattactga  
tgaagaagattctgaaatgtctctgcttagctgattctccgttfaacttttctctcttttccactcaattctagttatttagattctgttfaaagaatcaagaagat  
gaatagaactaagaacacacaaaaagagcatatagggccgagaccattaccaaaagtctcccaataatcatattgggtatctgttccctctttctatttaggat  
ggggcatgttggattttccatattccatataccatcgaacctaaagggtccagaacctcctttttgctagtttggaaacggaaaacctgaaccaggagcagata  
aatctactgcccgcctttacaagaaaattgggtataaaactccactacagttgttcaaaatgcaccaatcagaatcccttgagaatattcaagaccctatttcaaga  
gaagaggctactgctgaaaatcgttcaacaaatccgcttaagaaaattgcaaagtttgaactcgaaggttttccaaggatgctgttaaaaattgttcaacctc  
tcacaaaaacagacaagaagtatactgaaaatfaataccagccatagggtatagaagggcgcgaattcgttataccccaccaatagaggaaataaaac  
ataaatggagaaagtttcatgataagatcagccaatagaagaaaagtcctaattttcagaccgttctgagcatgtgaaaagcacaatagcctaaagataaaaaac  
cctatactttgtcaagtataagagaaatgaaagattttctattttctgattttctaaagatttttgaacctgacctgaatagacttatatactcgaatatacag  
atataatgtacatattgagtagacctataatgggaaatgaaagtggtcaatttggaaatgaaagccctttaaactcagtgtagagtaatgccatgtaagggc  
ataagtcacgggtcaaacccgataaaagggtttttacttagtggtgagatgacccggtgaagcgtgagtcagtggtcaaacccgatacagctatttactaa  
atcactcactttctttttgaaaattctctttttatgaaattgataacttagtgcgagatgcatctttttgtaaacactaagcgaagcaggggggtgtaattg  
caaaaaaagaattggactcttttctattagatcaatcaactaccctgactgaactaataagaatcccttttattatctattctattccatctttataaacgaa  
ttccctaaaagtaggggatgacccgtgaaftaacctaacctcaactaaaataaatctcaaaaagcataatggaaaagtaggaaggactccttgccttggatgag  
ttactcttcgagatattgacaattccaaaaactgctcaactactattatagtaaatgaggaagcgggttatacggccctatctagtgatgcccctatctgta  
gtgttcagacatctctttcaagggagcagcggggattcgaactccctggggtagggaggtattatgaaaggaggttaatacatagattatacaaaaacctaga  
ataaattctctgggtcagatgccgagcgggttaattggggacggactgaaattcgttgacaatattctacgctgttcaaatccagctcggcccaaaaactaggg  
cttctggaatagattaaatccattttttctccataaaaaaagaatattgatccatagaataaaagaaataaaggataaaaaagaaaagggaaatatttcttaact  
atatactttctctctctcaacaaaaagaccttttctattggttattgaaaggtgattcttatctatttttagcgataataaacgcgacatactagttatgctattc  
actataccccatacgataggggtatgtagtatgattcgtctatttcttagtagtaggacagggcaatattctattcttattggtccatttaagaataagtagccata  
cgcccccggggattgtagtcaattggtcagagaccgacctgcaaggcggagctgcccgtcagccccgaactagggtccaatgaatgga  
gaaatcattcttttccatgaaaaagggggcaggaagcaagatcaaacctatgggtaccctatttacttttttagtgcgtttctcagtaagagag  
gagagtatggaatttttactactctgttgatagcgaagacatacatatcagtggaaggatcctctatgtatactattccactctcaacctgaattg  
attgatagatccgatattcataatattgaaatgattcagttatcagaatcgaagctcccttgaatttacaggatacccttttccctccatgggattacatccgag  
ttattgcgaaaaaaagagggtatggaagcaatattctcgcattttgctactgctattgtctattctagttcctactgcttttacttattattatgtaaaaacagtcagcc  
aaaatgattaattggaagttcaatattcaatgaaagaaatgaaaaaggattaaaataaaaaaaatccaagcttaaatgaaaggatccggttggatcataaaggtg  
ggtgaaaaaaactacataatgtttttctcacacttttagagctttctattatattcttgaatctacatagaatagattactagattgaaatagtagtcaattcaattctt  
tttctactgcatccacttaattcaatcaagtcacaaatgaaaaatccatggagggagagaaaaataatagagaatagactatagtaaaagaaaaagtaaaaggaa  
aaaaccagcgaatcttcatgcttaaacatgctcgcgaatgttcaaaaagagcataaaattattttaaagaactaagaataagaaaagagtataaaacaaatggaat  
gtcggatattgtggaaatagctccgcggaagaaaatcaaaatcttatgtagaactttttaaaccatgggtcgttcttagtagcattatgaattgctctaccgctct  
ttctattttctatttcttactatataagaatagaagaaatataagaataagaagactcttctacaagagtttctacaggagtgaacaaaatt  
aaagaaagagagaaagaataaagttcggcaaaatgattaatgcaaacggtaattaaagaaaaggtgatacaacaatcgaactcaatcaatagtagtate  
cctagatgccactctccccatactactagtgaaagagaaatgtaaaagactaccatfaaaagcagcccaagcgaacttactatccatgtaaatatgctcctatt  
tctatgaaggaatttctactattgatgaaatcatagtagaatcaagggtacagagtcataaaaggggttctgacctaaaggctatggatgaatcagttcaagaattt  
acttcaaaaatcttagagtttctgtagaattggggagcattaagataaataatgatacatagcccttcttataaaaaaagaataagaaaacgctatctacccct  
attggtatcgtttggccactactgctaaaacaacccagtttgaggaagaaacgggtggttctcaaaatccagatcgcggagcctgttattcttgccecaac  
ttatgggggtcgaattgtcgaattggatcagctataagcctaagatatttattgatcaggcggcaccagattgaaactgggataaaggatttgcagctccctg  
cctaccgctggccatgcccgaaaaaatcagatcaaaatcgaagaaagagcaagattatcagcagtttctactaaaactaacttttcttattcaatctaaactta  
cttactttttcaaatcttttcaaaaaatctattcatttttggatccagtttgatttctcctcaaaaggattcttcaaaacacacattgtaaacactagaaaactc  
ccttttcttctattgaaatgaaaaagagaaaaagtgatttctagtcacaagctacaaaatfaagaacaaatggaaccataactagaattcttttttttgaattc  
gtattctctcccgcctgcaatfaatgcatataaaagacaatgatttatgctaatccgtataggtaaactccaggtccgaacagcattattatctatggatccc  
cttatgtacatattctgtggagaatcgttcttaattttcattgcaatfaaatcttgaataaaaaaaagaaaattgactttgctatgtggagggtccagaactagattgca  
tgtacttaaaaaagttacttatttttagattctacaacgaaatcttatcttatattttatagaattctactactacgaacaaaaaaagaaactcaaatctttttgaa  
atfaaactaagcgtctattcgaactaaagcaaaccttctagtgctataaattattatcttttggttttatccattcatagaaaggagaaaaaatgagaatcttt  
gccgtcaatcaagaatatacactgtaagtggcagaatttttctgaggtctaggaattttatcacttatttctatttctgttggaccctgggaaatcga  
actttctgaaattgctctattcatatgtaaacatataatgaaatcgtatgtggagttcccagaaattcagtgatttagtaaacagaatataagttccataatg  
ctagatcagctgtagggattgatgaagagtgagctgataatgaaattttcttgataaacaggaacttaagattagatgctccggaaatgaaatgaggaatgct  
cacaataccggatttagtcagatcaatcagggattttgtaggtcattatcaagcgttgcgagaagaactgagaagttccaacaatfaaagatccagatcac  
gaaatttcttcaattatttgcgaaagatataatgctagaacctcgaataaaagaaaggatgctgtgtatgaatcactcacctattctccgaattatcgtatccg  
cgcgattattttgttctgatgtcgaagcgaacatttctattgaaacattctataatgaattccttaggaaccttataataatggaatataccgaattgtgatc  
aatcaaatattgctaagctctggtatttactaccgctcgaattagaccataaagaaatttctatctacaccggactataatcagattggggaggaagatcggaa  
agcaattgataaaaaagaaaggatgggctcgcgtgagtagaaaaaaaagatattctattctatcagctatgggttcaaatctaaaagaaattctagat

aatgtttcctaccctgaaattttctgtctttccctaatgctaaggagaagaaggaggattgagtcataaaagaaaaagctatfttgagttttatcaacaatttgcttgttagg  
tggggacctggatfttccggaatccttatgtgaggaattacaaaagaatttttcaacaaaaatgtgaattaggaaggattggcgcacgaatataaatacgaagactg  
aatcttgatatacctcagaacagcaccttctgtfaccgcgagatgtattggccgtacggatcatttgattggaatgaaattgaaacgggtatactgacgatgacga  
tatgaatcactgaaaaataaacgtatcgttcggtgcggatctgttacaagatcaatcggactggctctgtctgtttacaacatcggttcaaaaaactatccgtag  
agtattcatacgtcaatcaaacgactccacaaactttgtaactcaactcaacctgattttatataaactacttacgagaccttcttggatcatatcccttatctca  
agttttgatcaaaccaatccattgacacaacgggtcatggcgaagagtgagttgtttggctctggaggattgacggggagaactgcaagtttccggagccgag  
atatccatccgagtcactatggcgtatftgtccaattgacacgtccgaaggaaatcaactgttggacttactggatcttagctattcatcgagaattgatcattgggtg  
ggatccgtagagagtcattttatgaaatactgagaagcgaagaaaaaaagagagacaggtgtttatftatcaccaaatagagatgattatgatagca  
gcaggaattcttctctgaatcgggtattcaggaagaacaggttctccagctagataccgtcaagaattcctgactattgcatgggaacagattcatgtagaa  
gtatfttcccttccaatattttctattgggggtctctcattcctttattgagcataatgatgcgaatcagactttaatgagtttaaatgcagcccaagcagttccgctt  
ctcgggtccgagaagtgcattgttggactggattggaacgcaaacagctctagattcagggttctgttatagccgaacggagggaagatcatttctactaat  
agtcacaagatcctttatcaagtagtgggaagactataatgttccctttagtaccatcggcgcctcaacaaaaatactgtatgcacaaaaacccctgggtccg  
gggtaaatccatataaaagacaaatfttagcggaggggctctacgggtgtggggaactgtttaggaaaaacgtattagtagcttatatgcatgggaag  
gttacaatfttgaagcgcagttataatagcgaactgttataatgaggtatfttatacttcttccacatcgaaatataaactcagacggatcaacaagc  
gtccgctgaaaaatcactaaaagaataccacatcagaagaacttactccgcaatftggacagaaatggagttgtgaattggggctctgggtagaacagg  
cgatatttagtaggtaaaftaacgctcagatagcgagcgaatcgtctatcgcggaagctggattattacggccatatttggctgaggtatccactcaaaa  
aaacttctcaaacactaccgataggtggaagaggacgcgttatcgtgaaatggaatcagaggatccctcgacataatggtctgtatataatfttcaaaaa  
gcgaaatcaaaftggggataaagtagccggaagacgggaataaagggtatfttcaaaatfttgcctaggcaagatagccctatttgcagagatggaacg  
gttgataggttftcaactccttaggagtagccctccggaatgaaatggtggcaaaatfttgaagctcgcctcgattagcaggggatcgtctaaagaacattataga  
atagaccctttagtagagatagcgaagagcctcaagaactgtgtttcaagaattatgaaagcagtaacaacaaaaaatccgtgggtattgaaacc  
gagtaccgggaaaaagcagaatattgatggaagaacgagacccttcaacagcctgttctaatagggaagctctatatctaaatftaattcatcaagttgat  
gagaaaaatccagcgcctactggccctattcactgttacaacaacccgttagaggaagagccaagcaagggggacaacgaataggagaatggaagt  
ttggctttagaaggattgggtgtctcatattttcaagagatacttactataatctgatcatcttatagctcgaagaataacttaacgctacgatctgggaaaa  
cgagtacctaactcagaggatcctccagaatcttctgagtgctgttcgagaactacgatcttggctctagaactgaaccatttctgtatctcagaagaactccag  
gttaatagggaagaagttgatcggaaataatctaaatcttcttatttctattttatgattgaccaataaatacaacaactcaaatggactcgttccctcaaca  
ataaaggcttgggtaacaaactacctaaggggaagcgttgcgaagtcacaagccctccactttcattataaaacgataaacgaaaaagatggatt  
gtttgcgaaagaacttggaccataaaaagcagaatftgtctgtggaatctcagcgcggagctgaaaacgaagacgaagatfttccaaaaatg  
gagtagaatttggattctcggatagcaagatataaagggatcacaactcgcctgactcagtggtattttaaaggcttcttagttatcgcga  
atcttttagataacccttaagaatftggaggcctagatataatgagcatttcttcttagcggcagtgctaaaaaaccaacttcttactgattacgaggttattcga  
ggatgaaatftcatcctgtaaccatagcatttccctttttctaccagcgttacaacattcgaatcgggaaatgacagaggcaggtgctattagagaac  
aattagcagatttggatttgcgaatfttttagagaatcctcgtcgaatggaaggaaatagagacgaggggtatagtggaatggaagatagaaaaaga  
cgaaataagaaaagttttttagtagacgatcaattggcgaacatfttcaacaatgtagaaccagaatggatggtttgtcttattaccagcttctcctccg  
aattaagaccattgtttataggtcgggataaagtagtactcggatattaatgaactttataagagagttaccgctcgaacaacaacttgcctatctataaaaa  
gaagtgaatagcggcagcagatttagaattgctccaggaaaaatftgtacaagaagccgtggatcacttctgatagttgggtcccggggcaaccaacgaggg  
atgctcacaataaagatatacaaatcattcagatgtaattgaaggtaagagggggaggttccgcaactcgtctgggaacgggctgattactcggggcgttctg  
tcaattgttgggtcttcaacttcaatcaatgtgggtaccctagatagcaataaaagctttttagctatttgaatcgcgatttaacacgaaactgctactt  
taattgtaggattgctaaaaggaaaatftgggaaaaggaaaccattgtatggaaatactcaagaagttatgagggacatcctgactgttgaatagagacctac  
cctgcatagattagcagcagcttccaaccactttagtagggcgtactatttftacaccattagtgtaaggttcaatcgacactfttaggggatca  
aatggctgttcatctacttctccttgaagctcagcggaaagctcgttactttagtttctcatatgaatcctatctccgctattgggatcctatttgcgtaccaac  
ccaagacatgcttactcggactttagtataacgattggaaccgctcaggtatttgcgaatagatataatggtgcgaaactatcaaaccaaaaagtaaatfaca  
ataataataatcctaagtatacgaagataaagaatcttfttctagttcctatgatgactgggagcttatagacagaacaactcgttttagacagctccctgtggct  
ccgatgaaactagatcaacgcgtcattgggttaagagaaggtccgattgaagttcaatgaatcttgggacttactgtagatttatgccactatctagtagtgg  
gaaatagaaaaaggaatccgtctatatacattcgcaccactctgtcatttcttttatagagaatagaggaagccatacaaggtatttagtcagccctattcat  
acactatcaacaagaagtttagattcggggatgcccccttgcaggggcattccgatttctagtagtcatcatttggccgacgaatccagattgagattgaggaa  
aggaaagtaactaagtttgaactactgactcagccattgtcgaatcctactcagcaattgtcgaattatactcagccgaaaaagggggtacttatttggcggga  
acgggccaatctggtcttccataataaagagatagatggaactgctatgaaacgacttattagcagattaatagatcatttggaaatgggatatacatccatatactgg  
atcaataaaaaacgctgggtctccatcaagccactactacatcatttcatggaatcagagatctttaaacaataccctcaagggatggttagtccaagatcggga  
acaacagagtttcttgggaaaactattatggtggctgtacacggtagaaaagttacgccaatccgtgaaatcgtgtatgctacaagtgaatattgaaac  
acgaaatgaatcgaatfttggataacagatccttcaatccagctatcattgtcttctcagagctagaggaaatgcatcgcaggtacaccaatgtaggtatgc  
gaggattaatgctgacatcctcaaggacaatgattgattacatcaaaagcaatftacgcgagggacttctttagcagaatataatftcctgctacggagcccgc  
aaaagggtttagactcgtgtacgaacggcggatgctggatattctacgtagactgttgaagtgtcaacatattattgtcgtagaagaattgtggtactat  
ccaagctatttctgtgagctcctaaaatgggatgacggaaaaacttftgatacaactaattgtcgtgtattagcaaacgatataatcgttccacggtgattgc  
cactcgaatcaagatattggaattgggttagcaatcattcataaccacttctcagcagaccatttgcagcacaaccaatataatagaaccccccttacttgc  
ggagcacatcttggatctgcaatattgttagtgcggagttccactatgctgatctgtcgaattgggggaagctgtaggtgtattgcgggcaatctattgggga  
gccagggactcaactaactaagaacttctactgtgggtattcagggggtactgccacctgtacgatccccctcaaatgaaaaatccaatcaatgg  
ggatttggcaccacacgtaccgctatggcagcctgttttctatgttatagactggataaactattcagatcagatattctacatagtgactattcctt

caaaaaacttgattctagtcaaaatgatcaatatgtagaatccgaacaagtaattcggagattcgtgccggaacgtccgctttgcaattfaaagaaaggatcaaaa  
aacataattattccgaatcagatggggaatgcaactggagtagcgtttatcatgcgccgaatataatgtaacttcgtcattacaaaaaacgcaattat  
ggatattgtagtaagatgtagcagactatgtagctcttttctccacaagatcaaatgaatacttattctttctgttgacggaggtatattttggcc  
tctgatggctgatgaggaagacatagactgttgacttttgtaaaaaagataggaatcttgatttcaacgccggtatcgaatgccaatggtcat  
tggaaatttctctattcttcaaaaattttgattgttagcgaaaaaagcaagaataggttcgccattccattacagatcatcaagaacaagaagaac  
caatatcctgttttgggatttcgattgaaataccctttatgggttttacgtagaatactatagttgcttattttgacgaccacgatacaaaaaagataaaaagggtca  
ggaattgttaattatgatataggacctagaggacgaatataggactcgagagaaagactcagagaacgaataggagcccaaaaaagaaatataggaccg  
agagataaatatggcactttagaggagactcagaggacgaacatgggactttagaggagactcagaggagactcagaggacgaatagggactcagag  
gagagatgaaacctagaagatgaataggatccagagaaacgaatatagaacctagaagatgaataggaaactcagaggacgaatagggagtcagga  
gaacaaatataggccccgagagataaatatggcactttagaggagactcagaggacgaacatgggactttagaggagactcagaggagactcagaggac  
gaatagggaacccggaggagattccgtcttaaaaaaggggttttgattgagcctcagaggacaaaaaattgacttaaaataccaaaaagaaatgagatcgggt  
tttttcttccaagaactgcatacttccgagatcctcatccaaaggacttgcacaaatgattattggagtgatcacaaactcaaaaaatacaagaagtcg  
gctgggtggattggtcagtgaggaagaaaaaaagccatacggactaaaaatctttctggagatattcttctgaagagccggataagatattggtggcag  
ttgataccactagaagagaaaaaaagattcgaaggatcaaaaaaagggaatgggtctatgttcagtggaaaaaattctcaagagcaaggaagaat  
ttgttttggctgacctgcagtcgctatgaaatgaacgaaggagaaattagcaaacctttccacagagatcttgcaggaagagggtatctccaactc  
tgcaattttattctcatgaaatagcaagtttaactcaaaatattatcacgaatagcaatcgttcgaactgtctgaattgggaacaagaagaaaaa  
ggaggctcgtgcttctgttgagataagagcaaatggtctgattcgcgatttctaaagattgggttaataaaactcactttctgatacacgaaaaaggtatgata  
cagaaagtgcaagactgattcctataataggttagatcgaccaatcaaaccttttctcaagcgaagattcaatcctcaaaatcccaatggggttaaaagaa  
tacctgttgaaatcaaaataaactcaatcttggattgctggcactcgaatgggttctgacttaagacttaacactccttaataatgaaatcaaaaggactcaa  
cgaatcctagaattccttcaaaaattttgggctcttcgaaattttcgggactcttagtacttaagacttaacactccttaataatgaaatcaaaaggactcaa  
ataatcagatcctgttaaaaaagcatttgcctctgacaatttgaacaaactcaaaagtacttcaaggacttaaacactccttaataatgaaatcaaaaggactcaa  
attctgatagtacatcatgttgatccattcagttaaattggcacttctccctcatgattctgggaagagacatcagcaaaaattcacttggacaattatttgcgaa  
aatgtatgtctattfaaacgcacataaaaaatcaggctcaatttctgtaaatatagattccttgtataagagcagtaagccttatttggccactcagaggcaa  
ctgttcatggtcattatggagaatcttcaaaaaggataggttagttacgtttatatacgaaaaagcagatctagacataacgcaaggtcttcaaaaagtaga  
acaaatctcgaagcgttcaattgattcactatcgcgaatctcgaagagaaatgaggttgaatgagcgtataccaagaattctgggggtcctggggatt  
cttgattggagctgagtaaccatagcccaagtcgtatcttggtaataagatcaaaaaggtttatgatcccaaggggtacagatccataatagacatagag  
attattatcccaagtaacatcaaaagtcgggttccgaagatggaatgtctaatgttttccctggggaatgaattggactattgcgagcagcagcagcagggc  
gggcttggatgaatcgtatattcgggcaatcttattgggaataaaggggttccctgaataccaaaagttcctatctgaagcaagtttcaagaactgctcga  
gttttagcaaaaagctgcttacgaggtcgtattgattggtgaaagcctgaaagaaacgtatgttggggggattatactgttggtaccgattcaaaaattgt  
gcaccgttaccacaagacaagaactttttcgaattcaaaaaaaaactatttgcgtcggaaatgagagatatttttctccatacagaattgtttctctgatt  
ctgacgtaacaaacttctatgagacatcagaatcaccatttaccctattatgatttaagatacaaaagcagatttttactttaaactagattttgacctagaa  
cgctaagaggttagatttctatttttttaatttaaaaaagagtttagttaattcaataggttatgcttataccatgtagaaggtccatggaaacaattattatttcaa  
gctatttggctcttcttaattctcgaaaaagaaagaatttctgtaaggaaggttagtaaaaaagaaaaaatcaaaaggaaggtggaaaaaatgacaaga  
agatattggaacatcaattgaaagagatgataagcgggaggttcaatttggctatggtattaagaatggaatcctaaaatggcccccttaccctcggcaaaagcgt  
aaggactcatattcaaaactcgtgaaccaccggtttttatcagaagcctgtgatttattgatgagcaagtcagggaaaaagccttcaattgttggtacca  
aaaaagagcagcggatttagtagcatcagctgcaataagggtcgtgtctattatgtaataaaaagtggttcagtggtatgtaacgaattggtcgtactaaaacta  
gacttctcaatttagagatttagagcagaagaaaagatgaaaaatccaccatctcccaaaaagagatgtggcaatctgaagagaaaattatctacttcaaaa  
gatactcggcgggatcaatatagacgaggttgcctgacattgtatcgtcctgatcgaaaaaagatatagctctcgggaatgtccattttggggattcc  
tactattcttagccgatacaaatgtgaccagatctcgaatatactgattccagccaacgatgacactatgactcaatcgtattgattctcaaaaattgattttg  
caattgtgagggcgttctctataaagaatcattgattaagaagaatgtaattcttggcaactcgtagattatggaatcactactattctttttgtttgcata  
gaaaaagacggggaatattgatatataaggggtattgatatattatcctatgatgtattctgatatcctaaataaagattaatactcaggttctgaggtgag  
aaaaagatggttgaatcaaaaagacttttttgaaggtcattttttacaggggacaatatgaatattataccgtgttccattaaacactcaaggggttatcagatac  
ggcgtagaagtaggccaacacttctattggcaaataggaggttccaaattcatgccaagacttatcacttctgggtcgaattactatcttctgtaggttcaatc  
atagctgttcgaatcccaaacatcccaaccgatggtcagaatttctcgaatattgctttagattttcagacttaagcaaaaactcagattggagaagaatag  
gtccctgggtcccttattgaaactatgttcttttttttttgaactggtcgggtccttttaccctggaaaaatatacagttacccttggagaattagcagcgc  
cacgaatgatataaatactactgttcttagctttactcacgtcagcggcatattttatgctgggtcttagcaaaaaagattgagttattcagaaatattaaacca  
actccaactctttaccaatcaatataagaagattcacaacaccattatcgttagtttctgactttcgggaatataattggcggatgaattagtcgtttgttctgtt  
tttagtccccttagtagtctataaccggtcatgttcttggattttacaagcggattcaagctcttattttgcaacgttagccgagcctataggtgaatccatgga  
gggtcatcattgaattgactgtttcaaaaatgcttttttagcttaactcaatcatgcatgttgcggaaaatcgttgggtgaaacaaaatagttgaattgcgt  
atgaatatacaactcagattgtagaagagagaataggctatattcgaattccaacaagatataagcattaggagggggcggagtcagcctagatctat  
cctttatgctataagtcagctatctttgtatgggttccactttaaaggaaattttttgaaatccgattcaatgaaaatgagaaaatacacaacaaaatagaagaaca  
aattgatattggatattatataatcccaagttagattcattatcaatccgatataagaaatcggattccatcaatcagatgcagcatattgtatcaattggaatcttga  
ttaattcctattggactcggattaggtcgtattccataggggtcttctctatttccactttattatgaattagatgaggggaaaaaatagaactcaagatcga  
gaggaagaaagaggtggaatgaaatcagttggttgaagaaagagaaatagaatgtagtacacaaccttaattgattagaactaaaaagagat  
ctcgaagcagctggagaattcagattatcgtttcaattgtacttttagttacttctgtcacaatagagcttagaaatgaattcttgggtgattgaccttaaccattct  
ttttgacacgaggaactcatgaatccactaattgctgctgcttccgtattgctgctggattgccgtaggtcttcttattggcctggaggttgctcaaggtac

tgctgcaggacaagctgtagaaggattgcgagacagccagaagcagaaggfaaaatcgcggctactttattgcttagtctagcttttatggaagctttaacaattat  
ggactagtgtggcactggcgcttttattgcgaaccctttgttfaatcctaaaaaaagaaacgagctcttttagattagatactttctcttttttagtaaaftggtattgctt  
ctgcaattccaattatatacaactttactcctaatttattactcctagagtttctattatggggacagacaataccccccaggaaatagctgattggagatgatcaa  
tttagaggatattgctgccgtcttcccgccctttgttagggcagtgaaagattttcttttttttagaatttgggaacattcaacaaggaggctttccaca  
ggtcaaacgagatttaagacttaactaaaagaaattactaaftaatctatttctattataaaaaaattgcattaaaaaacgatcaaaaaggcgagcgaagtaagt  
gatcaaaaactttgtcttctgctctctataagaggagagcatatgaaaaatgaaccattcttctgttttttagctactggccatccgctgggagttcgggc  
ttaataccgatatttagcaacaatctaaataactgtagtggttggtgattgatttttggaaaggagtggtgcgagtgctatttcaagaatagattggat  
ctatccggctgcactttagaatatttttagtattttcgaataaataagaaaagggtgcacgatctgcacgaattactctgaataaatgcagaatcatatgaagaac  
catagcattcgcgacattggtaaatcaaatcaactttgattctctatagaccaataatagaccattaacacgggttaaagctaaactgctgaagctaggcaaaa  
gggggtactctttacaactatattagatttagtaccaaatgctttaaacagaaatagctaatgtagaattatctgatataaacactcattatgataaaatggttgaa  
ctatttactagaaggggcaccctgcccctttttatccaatgccgaatcgcgacattgataaaaaaggagaaggttttgatttgaagaaaaagtaggaattctat  
ccatttctatttccattttctatttagttttcttaatagaattgaaaatttactaaaggcgaatacaaaaaaaacactttgctgccacgatagattttatctagg  
cggaagagctccttaattatctagctctatagggtttcggtatataaataaacagaaagagagggtagagggatagggctcattacataaaaaaatatgg  
aagtagccatagcaaaaaagaaaaagggagcgtgagagccaaatgaatcgaagattcatgtttgttcgggaagagatcaaaaaattgtaacttaataagca  
aggtaactactttcattaaaaattttagataatcgaacagagagcttctgactattcgaatcgggaagattgctgtagaggaaccattgagcagctcga  
aaaagctgaatcgtattcagaagctgaactagaagcggatgagatcgaatgaatggatactctgagatagaacgagaaaaagcaatttgattaatgccactt  
tattggttgaacaattaagaagctaaaaacgaaccctttattttgaaaaacaaggcgatgaatcaggtccgacaacgggtttccaacaagccgtacaagg  
agctctaggaactctgaatagttgttgaataccgagttacatttccgtacgattcgtctaatattagcattctcgggcatggaatgaaagatttaattatggc  
cttgaacttactttccctttagaattttagcatttttcccttgcctccgaaaaaaataatgtaaaacactaatggcaaccctcagctcgaacattcataaa  
attcctccgcaactgattgaacaataataagaaaagtagggattgagaatcggctcgtatgctcaagtgggggatgggattgctcgtattataggtctgggaaa  
taattgtaggcgaattagctgaattgcagaagggactaggggattgctctgaattggaaacaaaaatgttgggattgattaatgggcgatgggtgatgataca  
agaggcagttttgtaaaagcaacaggaagaattgctcagataccgtagcagagccttacttggctcgtttataatgctctgctaaccattgatgggagag  
gcgaattgtagcttcggaatcgccttaattgaatcctctcctgggtataatttccaggcgtctgtatgaacccctcaaacgggcttattgctatcgattc  
gattcctattggcgccgctcagcagagttattggggacagacaaaccggcaaacagcagtagctacagatacaattctcaatcaaaaaggcaagatgta  
atatgttttagtagctatgctcaagagcactcctcgtagctcaagtagtaactacttccatgaagaggggccatggaatacactattgtagtagctgaatgg  
cggattcccctgctacattacaactcgtccttatacgggagcagccctggctgagtttttagtaccgcaacggcactttaataattatgatgatctcca  
aacaggcaagcttatgccaatgctccttctattaagaagacccccggccgcgaagcttaccagggtatttttttgcattcacccttttagaaagagc  
cgtaaatataatctcttttaggggaaggaagtatgactgctttaccaatagttgagactcaatctggagacgttccgctatattcctactaatgtaatctccattaca  
gatggcaaatattctatccgcagatctattcaatgccgaattcggctcttataatgtgggtatttccgttccagagtaggatccggctcaaataaagccat  
gaacaagtagctgccaatcaaaattggaattagctcaatcgcagagttacaagcctttgcacaattcgcctctgctctgataaacaagtcagaatcaattggc  
aaggggccgacattacgagaattgcttaacaatccaagcaaatcctctccagttggaagagcagatagctactatttatatcgaacaagaggatattgattc  
cttagaaattggacagtagtaaaagaaatttctggatgagttacgtaaacacctaagaataactcaattccaagaattatattcttagcaagacattcaccgag  
gaagcggaaatcctttgaaaggaagctattcaggaacaactcgaacggtttccctcaggaacaacataaattttgcacgtctactctgttagtagaagtagtaga  
ggagaaatcgtgagaaagattttcattgaaatcgcataaaagtttcttagtttttagtatagttatttaagaatagatagaataaagattgctccaatagatttga  
acctataccaaaggtttagaagaccttctctatcattagacaatggacgctttttcatatttcttcttcttcttttctcggaccaagagaaaaaactgttagacc  
aaaactcttttaggaaagaaaaacaatgcatacaaatgtatgatcatatataaaaggaatagtaggagcgggtatgggaatcgaaccggcaaccac  
ggttatgacctgtcagctaccaactgttctatctgttaactaaagagaggggaaactagtggataaaaggggggtgaatacggccctctaccatctataca  
aatagaatagctcattatagaaatgtaaaagggcctctctacgatcatcaatccagaatccatacaaatgaagggattttatcttaccactgattctt  
ttgaccggtaacaacatgcataaacatttctgaagtagtgcggatagccaaagtctcagatgtagcttagcttccggcaaaaacaacgctgat  
gaagcgtgctggctactattagctggcagggattgcaattttctgcatttctgcttctcactcaaaccaagggtaaaactttgcttctatttttttgaagatc  
acgaatcaaatgatatttctgttcaatttctccgctcctctctctgaaatcaacttttttccataatgtccgctctactatctaccaagtatacggttcattccta  
caacttgctgatgttgaggcaatcagaaagcgcataaggaatataaccacggaaaagttagctaatcccaacttctgcttgcacaatggaagagc  
cacggcttactctccagcaatataagcgaaggttccgttcatgagccatgctaaagtctcaatattcctccaatataccagccagaaatgaagac  
ataaatccagtcgccccaaagatgccaataagaacatccacgccataccgataaactattcaccataaaaggattatatacattgataaggttgaaggttga  
accataggaatcttcaaccatccatcaataaagtgaggattcattaaattggaacgttgcctgccaatgtgatgtttccaatgccaataaaaagtaacc  
catccaatggtatttaacatccagaaaactgccaataaaacgcgctcccaagcagaataatcaacagtagccgcgaccaggggccgtcgaaggaaaatata  
ccaaaactttttatccggcattatttgaaccgctgcatctaaagcacccttactaaaatcaatgtagttgatgcaaacctaaagcaatagcatgatgaaccaag  
aaatcaccagctctattgtaagaaaagcaatfactattctgttaacagcattcaaccatccggtaaccataggggtcagcccgattgaaagcgggaccgctc  
gttgaagataagatatacgaaccatagctgcttaccatgagccgattgtatccattgagcaaatataggttgatcaagattgtcttctgtagtaccaaaagca  
agcatgagctattgaacataaaagcccaaggtatggaatcttagaagagactagcccaactaaatgagatagtagcttctttatggtcacaactctgcca  
atacattatctctattctgtccggattgtaattctctaatgaaaaaataagctccatagcaaaagccctgtcatgatgaacctgcaatgtattgtgatgattata  
aagctgctgtagtagtaaaagctgtgctatgaatgataaagagtaaaagtagatattgttagctactaaggaagtaataaccctaaagaaagctagagcaaga  
cctaattgaaaatgaatgaattattgattgtcgtaaagcccttatgcccacgcccaatcgaaccccggaaggatgtgcttcaaaagattttgatactgtg  
ccaactccgaagttgattcagacatagaccggcaatgagaaaaataatgcaatagctaaatgatgatgagcaatcggcagccacaacattgtgttggga  
tggaaatcccccaagaagattagaatagcagttcccgtctctgattggtaccaataaataatgattactgaatcggggtttggcataaagattccactgaccctc

agaaggggtcccaaccctgtggafagggtaatacatctaaagaaatfaccatcgaacgtactctcccctggatgctggaatagcgacatgaactaaatgctctgtc  
caagccaagaacttaccggaaggtcctgacaaatgatgattgagacgagatfcccgttttgaaccagaaaggcttggttccatttgggtttagatgtaac  
caaccctatfaagagatagggtagaagaataatagaaaagagctcctgtataaagatcttattggtccgtaatccaattgtataccaccactgataaaccca  
gaataggcgatattcactggaccggcggcctcctcagtaaaagctccacagcgggttgacaaaatgagatcccaaatgcatgagcaataggtcttacg  
tgtaaaaggatctgtatccatgattcaaaatfctcgaagcgaatgaaacagatfctcggacgacatagaaaatgattgtaattgcccgaagtgaagaa  
aaatgttctgataaagacgtcctcagtaatatcatgacttccgaaatcatgtgctgtagcaataccaaccaaatacagcagtagtggtggctctgagctaac  
cttgctaaacctgggaaatcttaattccataatgcttcaaatcctcctagccactatcctactgcaataatctcgttaagaagaatgccatgttggcaattcca  
cccagaagtaatgggttactctacagcactcctgtataatgctcaaggctctagctgagtagcaggagcaacttttaatttggatgagcccgaacgatagatt  
caatcagttcttcccaataaccacggcctgtaataaaacattaaactgaaggccagacaaaatgagcacttaagaaaaaagaccatagcggataatgaag  
aaccataagactgaattacttgggatgctctgcccacaagaatctcggagccaccatfaatcgttaatggaactctgtgcgaagtctcccctgtgatagattac  
cacccttgatcactttagtaccacaacatccgactgcaatttccaactgaaatggaatgactaccgaaatggaattgacatccagaatagacctaagaaaac  
atgatcccaggcggatactgacatgtccccctgcccaggccatcgaagggaagcgaacaaacaaagatttctttatcggtatcaaacgggaactgcgagc  
aaataaacaccttcaaaagtataacacgacatgattgtaaatgctggaatgtaggactaaaaatctgcggctcctaatggaataggaacaaagcaact  
ttccgctactgctactaactcgcacctcccacgttaagctggtacttgttgcaccaggagctgttactgtagggcggcagcatggagattttagccatt  
gagcaaatgctggttgaattgtagcggatccgaaacatacttggggacgacctaagcactatggtatcattatgaatgataaaccaaaactgtgaaaac  
ctagaatatacataccagtttaaggtgggatagattgcatcaggtgtctaaaggacacgatctaataagatctgtatcagctgttggatcatagctcttaccata  
aaaatggctgcatgtgcagcagcaactatfagaatccgcaatccacatgtggtgtggaacaaggaaagtgtgtaccatgtagcagtagctgtaggata  
ggggggcatagagtagcatatgtagctacaacaatggtttagagcctagcagtaggtaagagataatgagcagcagctgtttaggattcagtagg  
accttatggccctgctgtaaatggcctttatgagcctccaaaatctcagggccatgccaatacccagttggctctatacatatgacctgcatcaggaaaa  
gaatagcaatagctaaatgaggtgcgaatctcctcaaccatagaccggcgttattggatctagccctcggcaaaaactaaagaaatctgctatttggaccat  
tcaagtgtaaaaaagggtgctcctcggcaaaactaggataaagttagccaaaaggctgcgattcaagataaattcatgaggaagtgtatcctctaggatca  
acccagcgtcaagaatggttaactggtaaagatacatgatttgggtccccgccaagaagagaccgaatcctaataacctgctaagttagattcaacat  
ggattctacgcttggaaaccaggtaatttgggagcggcttgtgataatggaaccaccagcaaaaagcattaacgatcaaaaatcaatgcaccgattcgggtac  
aatagagttgtaattcactagtattccggatgctcgcacaaatctgaaaaaccggaggttatttggattcctcggaaacccccgctacatcaccattcaatatttct  
gcctacgattggccaaactacgtgacactgggtccaatgtgagtaggacttaagccatgctcataattgaaaaacgggcaccatggaagtacatgccactc  
aaccaagaaagataatggagaggtgaccgaaatgagcactaaagacttttcgagagatctcctcaaatcaccctgtatgactatcgaatcgtgagcatcagcatg  
taggtccagatccaagtgtgtagatcagggccttagctatttctttagaaatggcgggtctgcccattcctcaaaagatgttttacagatccctatccacaa  
caattttacttctggtccggcgaacgaatcatatfaagctcctcttccggacaagacatacaaaagagaccgccaacttttagtaaccttgaagatagata  
ttatgattagctcttcttactatctaccgctccttatttttttagtattcactggagcaatfatatfagaatcactgagcaagtgtcggatctattatgacataa  
ggattgggtgccaacgactttttttatcttgatttctccacgtaacaaaaaaccttttttaattaaaaagctagctatttttttaagagataaagcctatctat  
ctacttccctgagcataatagatttttttctgattccaaatccaagataaactattagaattataaataagatgtcctgatatattgcaatatttatattgccctttt  
attcgtttattacttctattctagaccctatcgtttatccttatgaaatataatataaaatagaaggcagaggaaagagatataatgaaattcttgattcgtatccgacct  
aatttattgattaatggatcaacaacaaaacccccattttatgaaaaaggagagtggtctattcaaatcaaaagcgtctgtaattcaccagttctgtgctcaaat  
aatfcccggagtaagcgtatagcttgttccaactcagcagcttgcataaaccagctctgcaatttctgaaatcaccctgtagaatggcctgttctcccggctc  
gaaatggtagtcttcccctagaaccgactttagagatttctaccctacacggctcagaatgctatcttaatttccctgtcttaactgaattcatttctcaaaatcg  
atcaatttcttctgggttacgagaagaagtaattactcaagttcaaacctfaaattttagcaataatcagttgacttttctcccactgcagaaaaatgaagcat  
agatagacctatctctcgtccgaatttctgaaaggttaactatctcgtttcatalatgaaatttctatagaatccttgaaaaagacttttcccataagcaaaaaa  
gaacttactatcttggatctgatactacaccgctgcttaatcccttagtgatcggctctattacataagcggattcctaaatttggccatcatggtgataagtaag  
cagtttttttagttgtagcaccagctggcactaattgacttttacggtccttctatcaattttagaactctatccatagatgtagtagccatacttcttctctca  
tttgattctcgtgaagtgtccttctctacagctgtagggcaaaatcgttgtttgacgatccctatgtagaaagcccccttctagfaaactagaaaaattttagctc  
ttctatttttcttctatagtgagatagtcgcagtaatgacagatcacggcattattataaaagccttggtagaaaggggttctgtagtgcctcataataatttga  
tccaaagcctttagtctcctcattgcttgtgtgataaaggcctatgttagatagataaactcgaatcagggatcaatttctagtcgctgactcataataatttga  
aagcttccgataaattcctcggattgagccaacatccgtacggctgttcgttctattcaaaaaatctccgttccaaaaccgtacatgaggtttcaccctacacggctc  
ctccttctgtacatagtagtaagcgaaaaaatctagaataaaaaatagattgattccatctcattatggaccgaaagggtggtattttccaagaatctctagc  
caaccttccacaagagggttttctaaccaaatgaattctattatgctagaggaaaacgatagctccaagaatttcttctcaacgcctctatttagaggaaat  
gccacttcaacgatctttaggtatagggtatccaaagtacaaactgatggttgtttatcccaactgctacatttagtactagtagtaggattagcctgtaatacagaacctatcct  
ttaggtgtaaccttctgctcaactaaaatctacaattgaagcatccgaggccgctcagtcgaggatacacgacagaaggaggtgtagttcactcaccctccct  
aagcgtgggttccctactaatttggtttctcctcgcgaacccccgcttctcgtaaaaccggggtgtagtagggctaaaaaaacaaaaaaagagtaaatcg  
caccatctataataagtaaatgccctttttcccggaggtgtcgaattatcgcataaaaatattgctacaattgagaaggcttcaatgaatttccattatc  
gggatctagcfaaattccaaccattctatctatatagaatttcttctcctcctccttctgttgaacaagaagagatagaaaaatftagtaagattgattcattcc  
ctatgctccaaatgataaggaggtatttctgctcagccaaattctcttcttcttctgttgaacaagaagagatagaaaaatftagtaagattgattcattcc  
acttctctatttcttctcaacaacaactctctatcaactatttgcatttcaaaagcattaatcgtcccataaccctatttctattttagttgtaggggtagatacctatg  
caaacagaattctagggtcctttttatgaaataagaatctccattcttcttcttgggttgggaaacccaactaaaacttttcaggggagcggaaattccta  
gtaaaaaaatcctggaccgtccacttagatgaaaggaatttctatcaatagaacaatggaactctcgcgggttgggttacctgtactgcaggaaataggaa  
aactcgtattcactcagtttttccataaagaattatggaggagagatggccgagcgggtcaagcgtagcattggaactgctatgtagacttttgttaccgagg



ttcgaatccctctcttccggttttcttaattcagcaacgtaaatgattacaatgatcaaatcaaatgacaatttattccagcaataatacaaacctttathtaataaagaattct  
ctafacaaatfactatggtatgtaaaatacacatagaggaaaacaacaaaaaggaatcctagggttaatcatttctgttagtggaatgggaaaatacga  
ttaagaccttaggtcgatttagtccgggaaagggaagggaagaaatctatgaaccttccggtttccttaagtcaagttgacgagagataatctacaact  
aaactcattttttgagaccgaccacttctatccaggattttttactagctcttataatgcaatgtgcaatcgtcaaatgcttggcaatccccgggctggat  
gaagcaatagaatttgaaccgacggtttgatcttggttatctctgtagtaataatctcgggggttgcacgaaaactgggtatacgaactacgacattaacta  
aaatatgtctatggttaactaattgccggcctcgggaatggtggaagccatacctaatacgaaaaaggatattatcacaacgcaatttcaagtaattgtagtaaaactga  
cctgttgaacttttgcctttccagcgaatgtacatactaaagtaattgctgtctgtagaccataatgaaaacgcaatttctgttttctgaaagcaaacgataatgct  
tttttccagaatggaatttcttccagacttccggatttaggttttctagtgcagcctggttaaagctccagacggcgtatftttttaaagcaggctcctgataa  
cgggacatgaagactcctttttattgaaatttcatttacacaataattcattgtattacattacagaatacatcgaataaaaaactgaattaaagtaaaaggataaaca  
gagtaaaatctactaaaagtaccacaaaaaaatggaatttcatcaacatctgaattttgtatataattattttttattgtttgtatctagcaaaattgtagggtagaac  
acataatagatcctgcttctccatttaattcggagaaaaagaggattttttgtcatggaacattgtagagaaaaagccgactatcggattggaaccgatgaccctc  
gactacaaatgcgatgcttaacctctgagctaaagtgggcttacaacagaaatagtgtaacaaatagaaatgtagataggaatccgtaaaatgtagatc  
ttaatttaatacttagctattaacttagtccgaaattggaagttctactagaaaaaatacagaactcataaaataaagttagatagatttttgaacttcttttctctaa  
ttcgc aaatctattttctaatagaatctatccaaattctatattgaatttgattttagatattttaaattgatagctcggacgaataatcaatacagaaaagaataat  
aatatatacgaaaacataaaagagaactgcgaatttctgtattttcagctcattatagacatttttgagatatttggttttttgtatttgcataatthaatgatt  
aatatttactaaggagaacatagaaatcagaaatgctaaattctgattagcaaaaaaagaatgaatacaagcgttagatgtagatttgaactctaaa  
aaaggaacgcggttaggtgggggagagaaaaacttgggatattgattcgaattgcaaaatacacaacgatagaatcaattcaatgctgaattgcaataag  
cggagtctcactagagacgaaccgtagactacatagagtaaatgaattcaacgattcaaaaaaactaacagatggaggaattgcacaaggaactcctggct  
caagaaaaaagaaaatgggagataggcgaatcggtagacgctacggacttgattgattgagccttggtagtggaaactgctaaagggcaactcacaattcaga  
gaaacctggaaataaaaaaggggcaactcctgagccaaatccatgttttgagaaaaaacagcgttctgaaactgaaccacaaaggaaaaggtaggtgcagaga  
ctcaatggaagctgttcaacgaatcgaatgaattacgtgtgtgtagcgaactccttcaaaatagggaagaaagggttccgaaatcaatacacacgtataga  
tactggcatagcaaacgattaatcacagaactcatatcataataggttctttaaactttttaaagtaaaataggaatgattatgaaatgaaaaatcataatttttag  
aattgtgtgaatccattccaatcgaatattgagtaataaactcctcaattcagatttccgaaatcttttaaagcggattaatcggacgagataaagagagagctcc  
attctacatgcaatactgacaacaatgaaattctagtaaaaggaaaatccgtcgaacttctaaagcgtgaggggtcaagctcctatccccaaacctcttttattccc  
taactctagatttatctgttttttataataggttaagattcaatggaatacatttcttttattatagfatcggcaaggatgctgatttaactcgaatttaaatattatt  
aaataggcttctttagcaatgcataggactgccccctcccatatcaaaatttggatattgacatagatacaaaactctactaggatgacacaagaaaaggctca  
ggatagctcagttgtagagcagaggactgaaaatcctcgtgaccaggtcaaatcgttctcggcacagaaaaaggatctccgaatgattgatacaaaa  
tacctgagatgggtgggatacattcgttaataatagatagatgatttttcatcaagtagataaatcttaaatagaggcacttcttttctgcaattttgcaatt  
cttaatttctattccgctattccgacaaatatttttattctgttacttcttacttctcctagttgttctaagtaatgcacgcggtacaagttcgtgtagggaaactctt  
gagtcacatattttctgttcatacgaaggaaatgaatattgatttccaacgaaatgaagcccttttctgtatgctatcgaacctttgtataattggaatthaatgaa  
tgaataggatttctgttcatctaggcaacagagcgtaaaaatattcctgacttgcataaaatcggagttgtgtgtataagtgagcatgaatttctatcattcaatgagc  
atctgtatttcatagaaatgggggttatatagctcttacgtaagggccacgctatccaacttccaggcatttaggatacgtttaagcgtggatgattatcataagagatt  
cccacatataaaaagattcgttctgaaaatcggaaacttccaaatccagaagacagatgggattctaggattatccttttggcgaagactttatgcatacttct  
tctgggtatctatacactgtattctcgtaaatgatacagcgtagcctaagatccaccgggtgcacgctcataagcactgggaaactgaaataattgtaaccata  
tacataaaaatgacagcaatggaatcccaatcctctgctttatttgaaggctctattcctcgtatgacgaaagcccaaatgactatgaaccactcatgtttagtag  
ccaatgataaacaacctgctgcaattcttctcctccttctgataaatttccgagttcgaatgcaagttgaaatattgcccctgcttctttttcggcaca  
gagctcctcaatcactaatttaggaagatactggacttttggatttgaaaaaagttcagaagatagctaaagtagatggtgattgataagcaattctgtctca  
taagttccagatttagtactgcccgaacataaagcttggctgtagtaaaatcagatttttctttgagatagattcgaactcactatctcgcgatactctta  
cgaagttttagggcactataacagcctctgttttaggtggcaaccggcaagtagacgtccacaggaatcaactcaactcccgaacgtactatagga  
tccgtactgaacattccaccgtaatagtacaagctccatagcaatgactatttggctcaggcatttctcactataatcactaaagggagccattttcattgta  
ctgtaccggctgttaaaataggctcctgcttaggactgacttggtagcaatccataacgatcaaaagtcgaatcgtgagcctattaatgaagcaaatcaatgaaa  
caacaactggtagcatatagaagggccataaactagagagcttgcacaaatcgaagatcttttagttagttgaaataacggaaattggaactgtttggtaagta  
ggggaaactcaatcaactcaactgcttfaatggaatcttttcttcttttttttttctgcaatattcagttaaagaccattccaaggctcctttcgcctatgcataaacta  
aaccaacaactaggataagcagcaaatgaaagcttgcataaaacggatatacccaaacgctgcaaaactcattgcccgaaggtagaagaagaccgtttccacatc  
aaaaacaacaaaaactagcgaacatgtaatagcgtattcggaaattgtaaccaagccccccatgggttctatacccgaactcataactagaagcctctctgttc  
ttcacgaaccggagctaaaagtgtgaaatccaaatgctaaaatggaataagcctgtctattatagaatgccccaaaaatacatattcgtgaagcagaaacat  
aaatgtactcccattatgtgaaataggcggaaactgaattagcaatcaagtcagcattgcaatttatacagaatttctcttcttctcgggtaacaaggatcggttt  
tctcaaaccaagggttagtttagcttggcttcttccacgctctttaaagattcctcaatggaatcccgaactccttctttttgatttcttctatttaggtatg  
gtggagacataattctatagaacaaaaactctcctcacttcttctcattttctagaatcctagaaaaaggaataaaacgaaatactacgaattagagccta  
atfaagataggatgactaatgtatgacgctaagtaggagtaattctataaaataaagaacttattcagaacgtagatcatttagatttaggtaactatagatag  
ataagcaaaatatactcaacaaagtaggaattcgaagatggagaacatctgcagttgatttagataaattcattttcttctctataatttctgatgaa  
tgagcctctgtaactctttatctattttatggcgcagcgcctgtccagctataaacaagtactaatagggaatgaaaactatacactaaaggaaacgtaggat  
ctctcctaaaatcaaaaaagacagacatattaggctatagcattcgaaccgtagacccttctcgtaaaacagatcaaacggattattatcgaatgattcga  
ctgttcaaaagaccaacatgatttttgcattgggctctttatcaactgatagaagatcagtttagccaccatagttttcttaccgaaagataatgagatggctcc  
ctcgcctctgattgattttgtattatgatctatcaagcaataccaaagtgttcaaaaggaggattacctttaggtctgcctccggcctaaatfaaatcaacct  
aagtgaatagagctctatcgttccgctacaagattgactatgagacttatacactaaagttcatagaacgaaaagaatttttggagcccttctcctattaa

gcctagcattfagtgggctggatattfacctfatcaactagcaaatcaataaaggcttattgttttaggcacctggattggctacgtaacggactgaaccaactattgt  
cagggcactgttctctattctcgaatccatgaagtaagacattgatttgaagaagatccactatgttcattgcataataagctctttgaaaagcattggcgacg  
tgtaaacgagtgctctaccgaactgagctatagccctgtcagagatacttaatatagagaatttctgtcaagatgaatattcttaatagtagagatattcttga  
tctgtttactataataacatacaataacgaagcgggtattgtctataaaaaggattcgaatcataatcgaatgaagtaaaaggctctctttgtgtgataaattgcctact  
taactcagtggttagagattgtttcatacggcgggagtcattgttcaaatccaatagtaggttaggttagaaaaactagatagcattggccctacttctcgtt  
cgctatctaataatttttctacccctctcccttttctttgtatcaactaaaccgttgggttctcaatagatggggaaatcaataaacgcctcgaactcgtatcctag  
ctcgtctgagagctaccttctcaaccaattcttctgacccctcagctcactcagctttagcttggctatttcaagtcctgttgagcttcttccggatcaatgactca  
cccagttccgcatcttctcaaatgatgatctatfattaactattctggcaaacgcctccacagaaccgccgtaaccattgactgttgaggaggcgtatttcaa  
gggacccatattctacagctgtgtaaatggggcgtggttggtaatacgcgaatttggccactattagtagataaaatgatttcttcaactcacaatcccaataattc  
cttaggagtcagatataaagatttaatttcaatttcaatttcttctcttcttaagttatagcttctgctagcttcatcgtattaccaccaataaaaagcctgtt  
gggttagccgttaatttccggaaaggattggtgaaatcccaatagtttctgcaagaccaacatacttcccggaaccggtaaaaacttctgccacaaaaa  
cggttgataagaagcgtcaatttctgctcttctacagttaacgatcctcctcgataattcatccaaccaagaattgcgataatgctctgaatttcttftaa  
cgttgtaagttgcttaacttctgcagtttcaatgttctgccaacgatccgaggttgaacatagttgaggttgaatcaaaagatcactgacagataaatcc  
ctttgaaagtaactcctggaaagtagcgtatccaaatgtgcaaatgttagcaggagcagggtcgtcaaatgcgccaggtacataaaccgcttgg  
atcgaagttatagatccctttttagtaagaatttcttctgcaaaagaccatttctgactaagagtaggttataaccactgcagagggcatttccctaataagg  
cagatacctccgatcctgtgaacaaaaaagaagatattatcgaatagaagcagcttctgcttattaactctcggaaatatttgcataagtttagggcagtc  
accaactctcagcagctcctggcgttcaatttggccatagactagccttctgactcctcaagatttttcaataattactccagattccttcaattcctataa  
agatcattctcagcagctcctggcgttcaatttggccatagactagccttctgactcctcaagatttttcaataattactccagattccttcaattcctataa  
cagctcccccaaatgtccgatttctccacgccgataagcagcctaaaagtagcacccttaataaccagtttcaagatggataatttcttaactcagataaag  
gcggggcgcgactatgaatagggaatgtgactagatctacaggacccaattgtcaacagcctccccagaagcgttgaataatcgtccaagtagtccac  
cgacaggaaactgagaggagctcccgctcaatcacttccctctcaacccatctgtagcactcatagctacagcttaactcgaatttctcaataattgtt  
gtacctcaagttacatttaatttctaccgtcagtgctcgaacttctgactacaaagcattataataaagtaacttcccgggggaaagtgcacccagc  
gggtccaataattgactgatacgcctgactttttctcaattgtagaacccccgggacgagaagtagtaggattgttctcaataattacataatttcaaaaaa  
aggaaattatcgaatttgaatttcttctgtgaataatgcaaaatcaacacaaaaaataccaaaatccaaaagtcaaaaggaaatgaatgaatgaatcaataag  
agaaaaagggaccagcactgatttctgcccacgaatccatcaatcgttactcatggaatgagtcctggaaagttcaatcaatcttttctatatacat  
ttgcttttgaacgatttctgactacttcttctatctaggactcagatacaaaaataataactactgtgaagcagatgctgcaacagagaatttctgtagtatt  
taggtatttccactcaaaataagaaaaaggggtctattaagaacttaataaggattagaagttgatttgggttgcgctatctatfaaagagatacaataaagatgg  
atttggtaaatcaatccatggttfaaacgaagcatttaacttaccataacaacactcaattctatgaattcctatagataaattctatagataaattgacac  
agggtgaccattatataatgaatgaacatattatagaatgaacatattcaacttaagcagcccccttttcttaatgagttgatattaattgaatatttttita  
agattttgcaaaagttcatttaccgctaatacctatcagtagaccctgctgtgtgagaattcctaattcagttgtagggaggacgtatgcaccacaacaga  
aactaaagcaagtgttgatttaagcgtgtgtaagattataaattgacttactacacccggagtagaaccaggacactgatatttggcagcattccgagta  
actcctcagccgggggttccgccgaagcaggggctcagtagctgccgaattcttactgtgacatggacaactgtttgactgatggacttaccagcttga  
tcgttacaagccgatctacatcagcccgttgggggagataatcaatatacgttatgtagcttaccattagacatttgaagagggttctgttactaa  
catgttacttccattgtggtaacgtatttgttcaaacccctacgcctctacgctggagatctgcgaattccccctacttcaaaaaacttccaaggtccgct  
catggtatcgaagtgaaggataagttgaacaaatcggctgctcttattgggatgactatfaaaccaaaattgggattatctgcaaaaaattatgtagagcatg  
ttatgagtgctacgcgggactgtatttaccaaagatgataaaacgtaaacacaccattatgcgttggaggaccgtttgtctttgtccgaagcatttatt  
aaatcacagccgaaccgggaaattaagggcatttgaatgcgactgcaggtacatgcgaagaaatgataaaagagctgtatttgcagggaattagg  
gttctattgtaatgactacttaaccggggattcaccgcaatactagtttggctcatttggccgacaacgcctacttctcattcaccgagcaatgca  
tgcagttatgatacagaaaaatcaggtatgacttccgtgtattagctaaagcattgcgtatgctggggagatcattccacgctgtgacagtagtaggtaagt  
tagaaggggaacgcgaatgactttaggtttgtgatttctgctcagatattttagaaaaagatcgtctcgcggtatcttttctcactcaggactgggtatccatgcc  
aggtgttataccggtggctcaggggtattcattgttgcatacagcctcagcgaatcttggagatgattctgtattgcaatttgggaggaaactttaggac  
atccttgggtaatgcgctggtgacgagcctaaccgggtggctttagaagcctgtgtacaagctcgtaacgaagggcgcgacttctgctgtaaggtatgaaatt  
atccgatcagcttgaatggagctcgaactagccgagcttgtgaatattggaagcagcacaatcgaattcgaagcggtagataaaactagatagctagactaa  
gtggataaaattagatagaaaaaggttcaataaaaaaagaagataaagatacaaaatcagttacgaaatgcagtaattcttcttttcttcaattgattgc  
aattaaactcggctcaatttcaaaaaagattgagccgagtttaaatagattttagatcagatcagacttgaacaaatcgggattccttattctatatttagaagat  
aaaggtataatacaataaataaatacaatatagtattatcagataatggaatcaaatcagctatttacaagaaaaagtttctatttggaaagaatcaatgaca  
tacaatgactacagcgtatgacttacccttaccgggttatttctacttctagatagaaaaaactaaaggagaatgaatgaaaaaagacagagtttgg  
gaagttagacccttctaaactcttcaaaaaagaggacatttgaactttaaaccaggcacaatcgtgagtaacaagtgactcgaatgctcgtaaagaaaga  
gaattgatttcaaaatgtagaactagatgacgaagtttctataacctgtatgaagaggtatttttagactccgatcaagagcagaagcttttctatttcaatg  
tgactgctatagaatcggaccatcgtagagaggtcaaaagcctctgatgataaagatacatttctcgggaactccatggggctatgggttcaacgcggta  
gacgtttgtccgaatttctggagcaaacctccgaccaacgatacaatgaatttttctattcacaagaaaaaagattcggaaatcgaatgactatagcacc  
ggaggaatattcgaattatattctatataatcatttttgcgcgggtcttactaacaggacttctcgtcagacgagagattcgtcgaaggaatgattcaccg  
gattttcatacccttgggggtgtatattgacctacaaggtcaagggtagatgagatctgtagtagtaaaagaatttgccttgaattgagtagtatttccctc  
ctttaccgcgactatttattatgcttctagaagagcagctatgcagagaggaatattcagtttaataaaaaagcctaaaaaagttaacattacggcaatataatca  
actaaaagtcctatgatcaatcttacagcggatttgggggtccgagaggttgaataagattgcatgtggaaggaagtagacgaaaaagatttggattcga  
taggcgactcgaactagctgactttgaaatcaattcaagttcgattagaaggtatgaaagggcgcgagagatcggaaaaagaaaaatcaaatcttttaattgcttctc

ctttttgctattttctattattatataatccattcgattcttttttttagaatacctaaagtattctaaaaaaagtattctataaaaaatcttttttgcactcaaaaatacaat  
agcaatattcgttaataatagataacttaattatatacagaatcttaagatatttttgaatgatcaaatcgaatagatagaatagtaattggaaggagacacctatt  
ctatgatggatttaacttaccctctattttcgtcccttagtaggcttagtattttccggcaattgcaatggctctttattctttatgtcgcaaaaaataagattgctagaac  
cgacgggaccgaaattttcctcaatgtatttccacacaggatcataatacggatctttttagtgaagtaataataatggtatgtatggtcctttctacacaaaatgca  
aaccgctatggatggggattatggatgctggatagagctacgagcataaatgcatgcatatgcggaaccgggtatagcgagtttttaagtgatcaacaataact  
tttgaatagaaagtcaatgtatcacaattttttacaggagtatctagttggcgaagggcatttcagaatcaaaaaagtaaaagtcaaaatcatttagcttattctc  
aattcaatcgaccgctgttagtatatcctaataatgaattggcgtacagaacacatatggatagaacttcaaaaagggtctcgaaaaaagggttaattttttcggcctgat  
tcttttctaggttactaggtattcttagcgggtgggctccagtattcttggtaagaatattatattctgacttccatcacaataattctttttccacagggggctgga  
gtctttctacggaaatcgacggcctattcattagcgttacttgggtgcaacttttttggtaagttaggcagtggttatgaccgattcgaatagaagaaggagtagt  
gcattttcgtgggattccctggaataaaacgctgcgtctccctcgattctttagcgggataccaatcaattagaattcaggttaagaaggctttttcctcctcgt  
atcctttataggaaatccggggccaggggccattcccttgaactgctactgatgagaagtttttaccacgagaatgaacaaaaagctgccgaattggcttatt  
cttgcgcataccaatggaagtattttagtaccattgaatttttgaatgaattgaatgaaagaattggaagaagaaagttttctaacacagggaaaaaggtc  
cctcgaattgcaatttgaagggtattttagtattatctaaaggaaagaaacaatgaggataagagaatgcttcaattgccaagtggaatagatggcga  
atattctccattttatccgaaaggactttttctattcttattccactccatgatagctaaagaactcaatgcaatgaaattctactagatagaaaaagaggaa  
tagatacaaggctcacaactgttatagaattttctcacaagaaaaagaaatataatagagtcagcgaataaagcggattcattaacaactcaatttacagatcaa  
aaatgaaaaaaagaaagcattgctctctcctatctgtattatcgtacttttggcgggagctcttcttcaacaatgctggactttggaatagaattg  
gtggaataccaggcaatcccaactctcctactgctattcaagagaaagagttctagaagattcatggaattagaagacctttttatctggacgaaatgataaaa  
gagaaaccgaatacacatgtacaaaacccttataggaaatcgaagaaataacaattggccaaaatagataatgaggtcctccatctatttggcatttct  
cgacaaataaactgttttggctattcctaaagtgttttctgggtaagaggaactgttatttgaattctgggttcaggaaattctctataacttaaatgactcagta  
aaagcttttttattcttttagtactgattttttgtggatttccctccaccgctggttgggaactactaattcgttgggtctataacgatcttgggttccctaacgact  
aatttccactattttgttagtttctgtgattctagatacatgttgaattttgggtctttttgtttaaaccgctatctcctcgtttagtcatattatcattcaattagtg  
aagcataaactcattgatctctgatattaatcaaaatagcatccttttctttagaaagaagccttttccatttagcaaaattctttttctatttctactcctcaagg  
tattcatcattccagtacaactgttgcagtagaatgacaacagattcgtgatagggaactagattagcttagctactatcaattatttagaanaatccgggatctgtg  
attggacatggaataatgaanaacttttcttgggtaaggaacagatgactgactgatttctgactgatcatgatacgaataaactggacatctattcaaatgca  
tatccatttttgcgcagcaaggttatgaaaccacgagaagcaactggacgaattgtatgccaattgccatttagcgaataagcctgtggatattgaagtcccc  
aagcagtgctccgatactgtatttgaagcagttctcgaattccttatgatgcaactgaaacaagttcttctaatggaaaaaggagggttgaatggtggtgct  
gttctattttgcccagggttcaatagcggccaccgattttctctgagttgaaagaaaagatagaaatctcttttcagagttatcgtcccaataaaaa  
aatattctgtgatagccctgttccgtaagaaatatagtgaaatcgtcttccattcttccccgacctgctatgaagaaagcgttcttttaaaatcccat  
atatgtgggggaaaccgaggaaggggacagatctatcctgatgtagcaagagtaacaatacggctataatgcaacgtcaacaggtgtagtaagaaaact  
gcgtaaaagaaagggggatgaaatccatagtcgatgcatcgatggacccaagtgattgatcttatacctccgggtccagaactctgtttcagaggggg  
aatcgtacaaagcttgcataaccatcaacagtaacatcctaatgtgggaggggttggcagggggatgcgaaatagtgcttcagatccattacgcgtcgaagcccttt  
gttctctccgcatccgtattttggcacaagtttttgggttcaaaaagaacagtttgaaggttcaattgtacgaaatgaatttctaggtcccgggatttctaccatc  
aagttgtaaaaaagccgcatfattggcgattgctagaattctctatgatccattttgaaatctttttgtttagactattttgttgcgagatgcttctcgaattcct  
tatttctatctcatgcaaaacgaggagaatgcaaggcaaggcggagaacaataaaaggaacaaatccttttaggagggttctgcttcttcaatcctctattgg  
gcacaagaaaaaggtttttgctttttctgtctgatttcttctgatacgaataatgaatttttctctattcggcaagattactatttcttattttgggtctgtct  
tgaactcttttcttaggttcaggcagatgtagtgacaaaaaggggaaagaaaatagggcgggggacaattttttagcaaaatagaattgcttactgttca  
ttaagttcaatttagaacttacagaattttgcacaaaaatggactctccattgaagcgttttttttttaggctagtgatgatttaataaggtttattatttatt  
acttcaatataatcaatgatttacaagagacttctccgggtaataaataattggaatcctcattgatcttcttctcctcgttcataaaagtgaatatttctggc  
gagggggttataaactgattgatttacttaacattatacaaaaataaacaacaaaacgaataaataagagggttccatcagatcaaaaggctt  
tcttttgtttttacaatacaaaatagaaaccgtttgtaggttatgaaatgattaaaaagtcgggtataagagtaagaatccgcgggtcttccgctctaact  
agataaaagggtgtaaggaccgctaagttctattttctgttacaactggtccctcaatfactatagatgaaccaatcagaatagaaaccgtaaaaga  
aaacacctatfaaaccaatcacagcaataccgggttacagtaacctcagcaaaaggaattctccagtagtaccggcatttccctacttctccactttatcaa  
gtgtcatgctagagacaaaaacagtcagatagttataaggtatgcttcccaaatggggataagagaatttctactactcttcttctctcaattgaagaagt  
aattggaaaaaaacagcaagtacaaaaatgagtaataaccacagtatagctgtacgattcaattcaacattttgttctcgggttattggtcagatgtctata  
gttgaatttggttatctgttggatgaactgcttctgattgatcccaagaaaaaacagtaggtacagctagctcgtgaacagccagccatgcactgtaaaaat  
aggatagggtcagatctatggtcattgaggcctcctaaaaggatcactaattcctcaggttgttctaaagaatcaaacggtcgggttataacggaattccttctcgg  
ctttctgtgaactactggttggcggaggactccaacacgctataagctaaaccgactgacaataaacaaccgcaatgaatagggaaggtatagtaagtcta  
tgaataaccagatcgaatactgtaataatatacgaaaaagacgttctccggtctccagacatgctgagctcccaattttgtacattcaaaaagggaattga  
ttccgtaaaagatggatcaaccagtaaaatagaaaactgataattcactcctgtgagattgcaattttgtaccaaggtgattttgagatcaaaatgtagtct  
atcctcctatggcagcaatcctgttctgcttgcgtaaacagaattctttttctcttcttcttctctatagggtaaactataggtattcaaggcatcaatag  
aaaacctcaattttagggctcacttaatttaccggctcggaaatagtagaataatcggaaataggctcaagatctgggaaaaactaaagttaattgattggt  
tggataaaagatttaggaagatatttctactgacacaatacaaaagagaagtagatgcgaaagctatccctcgaatcaacccttcccttaagaatttaattggt  
agcataataataatcaataaatagaaaatcaaatagtagataatctgtatgaaagagagaaaacattcttgaagaatcaagattcgaatcaacccttgccttgtta  
ctaacttcttgaccaactgcaagcgtggaaacttggcagttcttaggttccgaaatagtgtaattgaaaaagaaagtgctcgaatcgaattgattgggtcga  
aaggaatfaaaaaaaggaattcaggaaagatttcttttttaggagaccctcagggggtcgtggaatgcttttctcctcttattccataggaatcaaatcaatta  
aaataagaaggaaatagggaattcgaactgctcctcaaaaagaggttaaatcatctattgaaaaagaccaaaatagaaagaacttttcaattcaattctttatt

tttactggggttagctgatctagtcttaataattactttactcaattgacagattacacagcaaatctcttgattcggaaftaggactcatgcccatctgatgaatcc  
atftttttactctctgtatctactctatctgttttttagtattatctaaataaccgatgaattatgaatttccataacttaggtaagtctttaccaacatagttagtag  
taaaaaaatggaattaaacctttatctactataactagttattcggttttctattggctgttacttaacctagctctattttggcttgaacaagatagctct  
atftgaaatgaattgaatgaataagcagaaaagaaaaatctcttttggattcctggtattctacgactaattaccaattctttttctgtcattgagattcgtggat  
aatttagactactatttagggataaacgtactcttttttatccctcgaacaaatcgaatgattgaaagttttctatttggaaatcgtcttaggcttaattctattactta  
gcgggattattcgtactgcgtatttgaatacagacgtggggatcagttgattccttgaattatctttttgattgccctctctctgtctgaggaggaggtcaa  
attggaattgcaatttgtttgtaagttatttgccttgcctcgcacataagatagatggaatcacgctctgtaggatttgaacctacgacatcgggtttggagaccgcgt  
tctaccgaactgaactaagagcgtttcaaaaatcaaatccttttctactcctaatgtgtctcacgtacgtatagatccacaaftaaagttatacccgtttaatcgcact  
cctactactgcctataaagaagaaagaagtaataggttagggatgacaggatttgaacctgtgacattttgtaccacaaacaacgcgtaccaagctgcgctacat  
ccctttccaattgtgtacaattgtactgtacacaattcctatctgtttccacatcctaattttctgtcttttctatctatagaaatcctcgtgctatttctcttttggct  
cataatacaaggaattgtatatactaaatcaatcaattcaccataaagaagattactattccttggtaactataggaaggattgtcttttctgttttagttcgg  
aatttcgcctaaacaaaagaatacaaatgatcttggcaataatctgatcatatagcattcaataaggaaggattttcaatgcgggataaaaaacatatt  
ctctgtgacaccgtgtaagactctatgtttgggcttttagcaggttattgatagaatcaatcgtttattccagatgctttgtcattcccttttttattctagtgtt  
gctatgtggaatagatttctcgtgacatgataaaaaatcccaccttttagtataggaagaaaaaagaagaaagatagattgggttggaccttagagtcag  
aaaaattggttaattctattttgaaaaaagaattcaaaaaagcagatcaagcagtaagcagcctcagaatcagagcatagaagagagctgggttggctac  
taaaatgaaggatttgcctcaaatccttgaatttgacaaggattgattccttaattttctatttttacttaattgaaaaattccaaaaattttattctaatgg  
atfttctctctctcgtttcaaaatagaggaataaaaaaagaatagtagaagaatgaatgaatcaaaaaaggaaaggaggttcatgccaaggggaaagat  
gttagaatcagagttatttgcattgtgtgagttgtgttcgaaaagggcccaatgaggagtcggcaggattctagatatagtactcaaaaagaatcggcacaata  
cccggacaattgaaatgaagaaatttgcgttattgtcgaagcagcattcctcgaataaagaagaatagggacatcttgttccgatcttccaaagatcaaaaa  
gaataagaactcctatttaattccttttaataatagagcatagatagaatacaaaaatcaaatcaacttctgatttccattagatattttcatatgatcagggt  
attcatcaatataaggacaaaagagagactacttctcgtgatccaaaatataaaaaaacaatcaattttttcaatttttaaaataaggaataaatcatgatatact  
aaacaacctttcataatcaaaacaaactttcataatccaagcaaacctttcgtaaatccaagcaaacctttcgtaaatcaaaacacctttcgaacccaacaa  
cctttcgtagcgtcctcggattgccccggggatcgaattgattatagaacatgagtttaataatcatttattagtgaacaaggaaaaatattatcgagacgaat  
aaatagattaacctgaaacaacaacgatttaactcttgcataaaacaggctcgtattttatctttaccattcgtactatgagaatgagaaacaattcaagccc  
agtcaattcaataatcaggtcctagaccagaaaaatagacatattcctcattaacacaaaagttcaattcaatcgaacttaagaaactccaaccagacttta  
agaacaacaatcggaaacttaagttccgattgttatttgcgaaagggccagactatataaagaagaatcaatttagattcttgggtttgtataaagaag  
aacaatggggaagaaaaatagttttttatttattgcaacatctcgttattcctaccctaatcttaattattgtatctcccggagttacctctccgggaattctttta  
attattcgtatattactttttatcccttaattgataatctttatttattgaaatcgtgtaagattatttggatttaatacagctacttgcgaaggattttacgattaagaat  
caattctttctgaaagattgtgattaaattactataattatcgaactttatgatccgcgttgcgttattccgactgatccacaaacgccgaaatccctcttttgc  
tactctatctcgtatgagaggaaacaacgctcttctactctgtgagtaatcattcattaaagcttaaatgagccccttaagtttgaaggcaatgaacgattttgc  
ccgtcgtctccgagctatatactcgcggaaactctgtcattgaatcaaatcaacttaataaactaatgatttctctttttagccatccttttccattataaaca  
aacgaattattccatataataaataatgattccaatgcttttgcactataacctcccaaccacaattttcttctactccttcaatttgcatagaataaaaaatt  
ctaacgatacaaaaaatagttgggtccatcgtttctatggttccctttaaacggcggagccctctctatacaccggagcccttctttcattcacaagggtattgtg  
aactgtatagttcacattcttggctacatcattatagatgaaatagctttttcaacaataagagttatccatacagtgacggcatttaattatgaaagttggttaag  
tagctgacctcttagtccgttttttaagataaaggagcataagcctttatcttttactatttctcctccttaatgaatagccgttgcaccaatgggggaattgctt  
ttatttcaatctagatgattgattgcacaaaggaaaccagaatccatacctgtagaaatctaggatagaagactctatctattcattgtaccgatcatgga  
tacttcaaaatgtcttatttggtaaccatgatccgaacgagtcgcacatacaccctagacatgttctcgtacgctgaggacatccctaaagcgcggccgattt  
ctagcattcgtattgctgtcttgcgttttaataagttgttaaccgttggcatgctgtatgataaagaaatggattggttagatcattcaacctgaatgattgat  
cattatgaagatttccattaaattgcataaaaccgaaattaggggttgaataaatttacagaatctggccactaccaatcctaaactttcggaaaccacactgg  
atcagatcgcagctcgtcaagcattcctccctacataatcgaagatccataagctttggctcgtctgctgacataaaaaacacctttccatgtctcggatac  
aaccaaaaaggcttgcctgttcttagtgcataaaccttctgatcattcgcgaacttctgtaacttccacttctagtaaaaaatctggtgttctgcccgataaaga  
cactagcagggttggtaagcataatctcgcgtgggggaatgctatagcgttgggttctcctccaaagcagaatgaaggacgccaatggacgcgctattccga  
ggcatattgtatataatctggtgcaccgttgcacgtatcaaaaatcggcattctgagattaaaccaccgccgggggagttataaacaataaataatcgtcaattc  
catcttatactgagatataccatgagacctgtaatatgattcgtgacctcgaacgaatccttgaactaaaaaaaggtcctttctcgtacataaacattgataagtc  
aaccgaagtcgttctcactcgggaatccggtaaggtacttttgaacaccaatgggcatattagattaatatttaaaattaaagtaagaaatacacttaataatg  
gaaacgtaagaatggaagagaaagaaagaatccgagttattgtttcacttttttctattctatagaatactatagattctattaatacgtagattgaaataacata  
gattgaaagattatacataaagtaggataagacagattgaaataagaaaaagaatgggtgattcgaactaaacaaaaagagatagggatctattctcgtttttc  
caataagccaagctgccattgcattggcacttatcagatagataagatcgtcttcttcttctacgaacagaattggcttctatttttaaggaatgaaataa  
atattcagctttctgacacagaatccctagaagggttaggtacataggtatgtagatgctttgccaatgcgataaaataaagtgacatcgtgtctattttcttctgta  
aagggttattccatgggttgccttggatcgtgttactactgctgattgaatgatccgggtcgtattgctttcgttgcataatgcacacagctctagttctgttgg  
gctggctcgtatgctttatagcaattagcggttttgatccctctgatcctgttctgacccaatgtggagacaaggatgttctgctcattctttcatgactggttagaat  
aaccaatcgtgggtggttggagatttccaggaggaaactgtaacgaatccgggtatttggagattgaaggcgtgagggggcgcatttctgttttctgcttctgt  
ttcttgcagctatctggcattgggtatattggacctcgaatattctgtgatgagcggacgggaaaccttctttgatttgcacaaagatttggaaatcattttct  
tgcaggggtgcttgccttggcttggcgcatttcatgtaacgggtttagatgtcctgggagatgggtgtctgatcctttggactaactggaaaaatgtaaacgtgaa  
atccggcgtgggtgcagaagttttgatcctttgttccgggggaatagcttctcatatattgctgggtacattgggcatattagcggcctattccatcttagt  
gtccgtccacctcaactgctatacaaggattacgtatggcaaatgaaactgactttccagtagtctgctgctgttttttgcagctttcgtatgttccggaactat

gtggatgggtcagcaactacccaattgaattgttgggctactcgtatcagtgggatcaggatactttcagcaagaatatafcgaaggttagtgatgggfta  
gccgaaaaatcagttatcagaagcttggctaaaaatcccgaaaaatagcctttatgattataatggtaataatccggcaagggggattattcagagcaggctc  
aatggacaatgggatggaatgactgttggatggttagacatctatctttagagataaagaaggcgcgaactttttgacgccgtatgcctactttttgaaacatt  
tccgggttttggtagatgaagagggaattgtgagagcggacgtccttttagaagagcagaatccaatatagtttgaacaagtaggcgtaacgggtgagttcta  
tggggcgaactaatggagaaatttctgactctgactgtaaaaaataatgcgagcgtcccaataggggaaattttgaatagatcgggactttgaaac  
agatggtgttttcgacgagcgaaggggtggtcactttggtcatgctactttgctttgctctctttttggacacatttggcatgggctagaacctgtccgag  
atgttttctggtattgatccagactggatgctcaagtgaatttggaaacttccaaaagtcggagatccaactacgagagacagccagctgaggccgattg  
ctttggtatcttccactctctttttgattgacatgggaacatctcccacctctttgactctttttttatatacgggaaatgatcccaaatgacaaatgaataggg  
tggagttataattgaaataaacacgatcgaatctatggaagcattggtttatagttcacttttagttcacttttaggataatttttctctctccgagaacca  
cctaagggtccgactaaaaaagtgaataatttaattgaagtaagaagtcctccatctgggagacttctactcaattagtcctcgtttctgaatggatctcttaatt  
gttagagggttgcctaacgcggtatataaggcataccagtaaaagcttacaagtaaacagatagggatggcactaaagttgctgtttcattttatagaatt  
tcaagattacaatggatctacgaaaagatcgtgtattacaactacaacggaatagatacaaaagcaacaataatfaaatggaatttatgctacacaacccgtg  
aagatagttctagacctggaccaagacaactcgcgtaggtaatttattgaaccctgaattcggaaataggaaagtagctccgggtggggactactcctttat  
gggggtcgaatggcttattcgcggtattcctatctattttagaatttataatcttccgtttactggacggaatttfaatgaatagggttctactaacgaaactac  
gaaatcagatgtttccatccaaaagacctttctactttaagctctacattctgacattctggtagtccgaccgtggaatttttggttcggatctctggaatagatg  
tgtactgttagaattgctcctattgataatacagaaagcactgtatctctatcaagatgattcaattcgtcggatatttttctagatctggaacacgaaata  
gatagatggatcaagaaaaaaaatgaaactatgattcatatcaactattcagacctcgaaccagactgaaaaaattcaagtagtttaataaaaaataaaaaa  
gaaattcttctccaaatgttggcccaaaaaaactttttctctcgtatttgcgagtcattacaccgattcaataatgatcatcaagcggcttattcgaagaa  
cccttgcattttgttagcttgagactaacatcctggctctagatgaatcaagggttttaattgaaactgattcatagatcgaacaagataatctaccgaaaaacta  
ctccaaatgttcttattttatctagtaaaacaagagtaaatctgcattacgcacaaaaaaagaaatccaaaatagggaagaaaaaatcaagaggcctctaag  
atcaacatttggaaagaaagatagacgagcacaactgagatttttggcattatcacaagaagaaatctggattttcttattctatactcaagcacaatcgaac  
ccaaccagtgctgatgaagtttgaaccttttctaatatccgttgaaaattgtgtttctgtttgagccgtacgagatgaaattctatatacgtttctggagggg  
ggtcgggttagttacctatcacaataagatattgattggttggagacgtctgagattcaggcaattcagatgatataactagtaaatatgttctctctcatgca  
catattttattgttaggggaaltacacttactgtttctagtaaaagttgctaccggtttgctatgacttttactatcggcaaccgttacagaggcttttctcctgg  
aatacataatgaccgagcccaacttgggttgaatccgacgtctcagatggtcagcaagatgatggttctaatgatgactcctgacgtattcgtgtatctca  
caggtgggttaaaaaaccccgcaatlaactgggtcactggtgtggtttgactgtatlaactgacgtttggtgtaactggttattcttacctgggatcaaatgg  
tattggcagcacaatgtgacaggtgtgcctgacgcgattccggtaataggatcacttttagtgagttattacgtggaagtgtatgtgtggtaacccactttga  
ctgttttatagttacatcttctgacttctctgctactgctgattttatgtaatgcactttctaatgatacgaagcaaggtatttccggcccttataaggaggcat  
ctcatagagagttcaattctcatatcatatcgggtaggttgggtatttctgctacaacatgggttattctaaataagacatgtcattagatacttcttcaactc  
cgaactatttgatacaataatacaaatggtgaagtaattttagaaagaaaagaaagcggatattgggagtgctgactgaattattgattggccatgcagata  
gagagttggatctgccacattagaattcacgaccaaggtgtctccatcaatcaacacgtaagtcctctgtagaaggataggctgtcacttggaggagaat  
atftctatgatcatactcaacatgtcatccatgaagaggtccgtaagatccatagatagaatggaataagtcattgacatgatccaattctctattttacac  
ttacttttattatagtagtaaatgcaattctttgcatcgtattgcatctgcaatactatcggagtaaaagaaaggatcaaggaagaacgtaggtaaacctttt  
atftttattagtaacaagtaataacttgggtggacgtaagaacttgcataattgggggggataaataccaactaatcaagagacgcgagacaatccacaagcaatt  
gatcatgatcaaatgtaaagccactggatattgagcatttaccataagagtaggattcttcaatgaatggtgaggtgcaactcggaaaaatagaatctgataa  
agcttttctacttagaccattgaccattatataccttattctattatggatcttctacggtttatttcttcttctgctcagccggatgaaaaatctcatgccc  
ttctttgggggtggtacttaagaatcactatcccaataacaagaacactgacttaacgatcctgtattaagagcaaaatagctaaagggtggacataat  
tattacggggaaccgcgtggccaacgatctttatattttccagtagtaattctaggtactattgcatgtaatgtaggtttagcgggtctcagccgtcaatgattg  
gtgaaccggcggatccgttgaactcctctgaaatattaccgagtggtactcttccctgtttcaatactccgtacagctacataaagttattggcggttctct  
aatggttctgtgccagggcttattgacagttctttctagagaatgtcaataatccaaaatccatttctcgcgccagtagctacaaccgttttttaactggactg  
cagtagctcttggtaggtattggagcaacattaccattgaaaaatccttaacttttagtcttttttagggattttcagtttgattcattcaatcgtgaagtaccgtgcata  
ggfatctaggaatagttacttcaagtgaaatctccctagatactataatctttttatattatgataccatttctcgcgaaatataagattgtcccaagatgcaaaatgtttct  
ttttcttttatttcaactcgaagaaagagaggaagaaatgcaatggattttaaactagaacttattcttaggtaaatccattgggagatgcttctctagagtgccc  
atactgttttccatctgcatagaaaactgtcaattctcatcagatcttctccgtctactcaaaaagggtccaaatgtagtgatattggccctttgagacaattatag  
tctagaaggcagtttaattgataataaaaaatacaattcaatgaaatctttttgtttttcttagattagttatctttttgaaagctttaaaggggggaagtaaacctgt  
ttttatttcttggaaacgagtagctctctctcgtgtgagaaaggaagaaataatcaatcaatcagagaagcctcataaagcgttctcttaggggttaaacctc  
cattggtccatattctagaaaaatgactcatatttgcatttccattccacaagcaaaaatactataatcacttcaacttcaaacaggcatgatacagcatctataggata  
acttccatctgagtgcttctgactcctgtgataccgcatctcttctgacgtaactcaatcggaaatccgtgggtctgcaagtagctataggtgtgccc  
tatcaacgattctacggaagcggtaagataatcttggcagttatgtatctaggacctttgacgcaattgatcggttcaactcatagagattacttcaata  
caattcttcaaaatfagtaaaatcttctgaccgatttcaatactgctatfagtaaatctgtcggcagcgtcccaatfctgatgtgatacatgttcttctgttt  
ctcaagtaaaagcttctgcaagcaataccaacggtatccgcttacccttttaagcggggacagaatgaaacgaccataataaagacgcttactatctactctg  
attcaacacacttccactgtagtggtagtgatcctctcgaaccatatagactagattattattgatcattgaatcgtttatttctctgaaagggtttaa  
attctttacagactcttttttaggaggtcgaacccattatcgccataggtgtfacatcgcgtatacaacttaactgtacaccattttagcaatggctcgtaatgcg  
gcatcttctccactaccgacccctttaccataacttctgctgttgcacccactgtacgaatagcatctacagctgttctttgaccagcatagggtgatgctttctg  
agcttttgaatccacaagtagccgcggaggaccagaaaaccaccgacctgcggtatgtaacagttataatgattgttgaactagcttgaactgaataactc  
ctttgttattctagctgactctccgtaaaactaaaacgcgactctacgcaaaccaatcgtacttctctacgtgaaccaatfittgtagatgctttgtcatatttattat

ctcataaatatgagttagaataacaaaaagaaaaagatacaagatatccgtttcagggtaaaatatacttacttgaatTTTTATTGGAAATTTGGACATTTTC  
GGGTACTTTTTACTTTTTAGAAAGTCAAGTTCTTTTCGAAAGATTACCCTGCTTTGTTATGCTCGGATTGGAACAATGACTCTAATCTGCCAGCCTACGAATCA  
GTCGACATTTGTACAAATTTACGAACAGAAGCTCTATTTCATATTTCCGATTCCTTTCTAAACTATGAATTTACTTTTTGAAAAAATAAGTCTTTGTTGAATTTAGA  
ACTTTGAATTTTACCCTGAAAAAAGAAAAACCTAACCTTTGAACTTTGGTACTCTCAATCTCGGTACTCTCGGATCTCTGAACTTTATGG  
GGAAGCTATAAATATACGCCCTTCTGAACTATAACGACTTACTCAATTTGACCTATCCCCATCAGTATCGTATAGAAGTACGCGGATCTTCTGAAATATA  
GCCAGGATGATGGTGCATTCTAGGCGAACGCGGAACATTCGTTGGTAGGGCTCCATACTAAACCCTCGAAAGTAATTTTCTCTCTCGGGTTTTTTTTCT  
CTCCTTTTTCTTCTGTCATATTTTTCTCCTATTTTTCTTTTTATTTCATAAAAAAACGTTGATTTTTGTTGAAAAATAGGAAGTCAAGATAGAATTTGGGTACTATAA  
CTATAGGTGGGGCGATTACCCTATAGGCGGGGCGATTACATATAACAAGACTTCTCCCCAATCTGTTTAGTGGAGTCTCTGATCTGCTATTACCTCGAG  
AAGTAGAAGAAGTCAATCCATTCGCCAAAACCTTAGGAATCCTGATAGTTGGCATAAATCGTAAGCCAGGTCGGCTGATACGCTTAAAAAGGTTCTAGTT  
CTATATATCCCTTTCTAGTCTTCTTTGATGTCGCAAGTTGAAACCAAGAAATATCTGTTACTTCTGATGTTCCGAACATTTCAATAAACCTCTCTGTAAGTAT  
TTAACAATGTTTTGGTAATTTGTAGATACTACCAGACGTTCTTTTTATTCATGTCGCGTTTCTATAGAGGTTAGTAATCAGCAATAGTCTCTGCCATAAGA  
CTCTAATCTAGTCTCTCAATTTTTCTATAATCAACATGTTCTTTTTCTTTTCGTTTGGATCTAAAGCATATACGTGAACACAATCTACTAATTTTTATTGATCTATATCT  
TGTCTACTAGTATATAACTTCAGGAGCTAATGAACTATTTAGTAAAATCAATCTCTCAATCTCCTCGGCATCGCCAAAAACGCGAGTCTCTTTGGATTTCTTT  
TTGATCAATGATAACGCTGCTGTCATAGCGTATTATACCCTCTCGCAATTTGACTTTTACATGTACGTACAATCAGCTCGAATTTCTGGATCTTTCTAGA  
GGCATTTGGGGCACTGCTCTTGATTACGCAACAATAACATCAACATCAGCATATCGTATTACTAGCAGCTCTATGACTGAATACACATCAATTTCTGAG  
CTCCACTGTTATCTGACATTTAAAGGGTCTGAGGTTGAATCATATTTGATTTCAATTTGTTATTTCAATGCAAAAGGATGAAGAATATTGCTTTCCAGAAAGAA  
GAACCTGTTTTATTCAACTACTTTTTGGGGGGTATATTTCAACCAGAAATGACTCTGATGGCATTGCTGGCAGCTATGAAATAGCTGCTCTAGCTA  
CAGTTCTGGACTCCGCCATTTCAAAAGTATCGACTGTTTAAACAACGGCTACCAATATCTGGGGATCCCTTTCCGAACCATACGTGTTCAAGCTGGTCTA  
TTGTAACCGTTTTGCGGAATATACGTACCCAGATTTCCACCAGACGTGCATATCGTCTATTGCTCTCTGCTCTCTCTATCTGCTCGCTCTATCTGCTCGCCTAATCCAAAGTGG  
TTCAAGTCTGAAGAGCATATCTACCAAAACAATAAATGCTCGGTAGGATTTCCCTTCACTCTCTATGTTGTTACGAAATCTGGTCTTTTGGGGTATAGTCTG  
ATGTTCTCTCTAGTCCATCTACTGCAAACTGGACATGAGAGTTTCTCTCATCCAGCTCTCGCAATCAAAATGAGAAAGTGTGCAAAATTTCTAATCCACAAT  
ATCTAAAATATTACGGATAGACACATTAATAGGAAAGGTTAGGTTTTAATATTGAATTTATAAATACTAAAATATATAGTCAAGAAAGAGGATCTAGAATATATCT  
AGATGTGATGTTATTATCTATATTCTATATTAATGTAATCTTTTTTTTTTTTGAATCTCTTTTTTATTACTCTTATTGAATCGCGTAAAGTATTCTAATCAAAAAATTT  
CGGGGCAATATTACTCTTCTGCTTATTGTTAATCATAACCTTATCAATAAGACAATTTTTGGTTGTTCCATCCCAACCAATGAAGTATTGGGATTTTCAA  
GAAAATCTATCCAGTATAGTTCTGCTGTTCCACTGCTTCTCTTAAATGTTAGTTTGAATCTCGCAATGGAGCTCAAAAAATTTCTTCCGAGTCAATTTCTAGT  
TTTATTAATCGGGACGCTCTTGTATCTTGAATTTGATTTCTGTTCAATCAAAATGATTCGAATCTCTGTTATTTTATATATTGATCTTATCACATTTCTTTATG  
ATGTAATCATAGACCACATATTGGAATCTATATCTTCTTCTCTCTCTCTATCATCTCTCTTTTATCTACATCCCTTTAGTTTGTCTCACAACTTAGAATCTAT  
TTTTTAAAAGAAAATGCAAGTGTACAGTATATGATAGATTACTCAATGATAGATGATTATTCATATAGTACTGTTCTTAGTTAGGATCTCGACAATACGAAG  
CAATAGGTTGTTATAGTTCATTTCTATAATCATAAGTGGTTCATTTTAAATCCCTTTTGAACCTAAAAAATAACGAGTACACACTAAGCATAG  
CAATTTATAAAGATTTCTCAATTTCAATAATCTATAGAAGAGGTGAATTTCTCTTTTTCAGGGATTTAGGGAAAATAAGGCTCTGCTATTTTATTCTATTACTG  
AACAGAATGGGAGACAGGGTTGTTATTCTGCTCAGAAATCCAAATTTAATCTCAATCTCATAGATGTTGAAATGGATAGCAGCAATAATCAATTTAGC  
GCGAATGTTGGAGGGGAAGTCTACTTTTTGATGCAATTCGGCACGCGCAATTTCTTTCCGCGAGACGGCTCGAATTTTACTTTACTCTTTATATCTGTTTTTATG  
TTAATCAATGCTTTTTCTGCTTCCGGAATGAACTCTATTTAATGGAAGCTATATATCTCGCAAGATGTTAGGTTGCTATAAGGTTCTTCACTTTTCTGATCCC  
AATATTAAGTCTCTGTTTACAGAATAACTCTTTTTGATGATCTTCTAATCTCTCGATTGCTCTTTTTCTTAAATAAATGGGGAAATCAATATGGATTATGACGTGGATTG  
TATCGATTTCTTTGAATTTCTATATGTTAATCTCTGGAACCTGAGCTGATTTTATTATGTTAATCTCTGAACTGAGTCTGCTTCTATTTCTATTCTGAGC  
CCTTTTCTATCTTTGATATAGTTCTGATACAATCCGATTTTTATCTCTCTGATACCTCAGAATAATTTTGGTTGTGCAACCAAAAGGAATGGTGAATTTGGGT  
GTACCAAGTCTGAAACCAAGTGGATTATTTTGTCCATATTTCTATTCTATTTTTTACCAGGAATCAAACTTAGATGATCTAAAAGATTATTTGATTTCTACTATATT  
TAGTACAATGTTATATGACACATGTTTTTTTATGGGAGACTACGTCCTCGAGCCGAGGCTGAAATTTATCATAATGACTCTACTGACTCGGCTTAGTGTGAA  
TAAATTTGCTTTGCAAACTCTAATAGTAGCATTGCTGCTCGCAATAAACCTTAAAGATGGGATAAGGCTCGATAAGGATGAGGTTCAATATCATAAC  
AGTTTCTGTAGTAACGCCAACGAATCTATCCAGAATCTTGTACTTTGAAAACGGACATGTTGATGCGTTTTGTGCTTTGAAAACCCGTTGAACTTAAAGTAGACG  
ATCGGTTGACTTTTCTGCGAGTTCTTAGCCACTCTCTCTCTTATCTAGGGGTATCTTACCAGTTGAACTTGTCAATAAAGGTTATCTCCCGCTTACCTAT  
TCTTTTTTTTTTAAATCTTCTATTCTGAATTCAGTTAACGACGAGATTAGTATCTTCTTGCACCTTCACTACTGTAATGCGGAGTTGGTACGAATCCCAATTT  
GCGACCTACATAGGATTTGTTATGTAATAGGTATATGTTCTTCCATTGAAATCGCGATTGATGGCAACCATTCGCGGTAGAAATCTAGATGCGCGGACCAG  
TTACTATTGTTCTTCTCTCTCTATATTGACCTTTCTATTTTCCAAATAATGATGAGCTACAAAAGGATCTGTTTTTCTGTCACAGCTGATTACTCTTTTTCCATTTA  
AAGAGTGGCATTGATGCAATATCTGATCGAAGTATGAGGTCAGAATAAATAGAATAATGATGAATGAAAAAAGAAAAATCTTAGTGGATAAGGGGCG  
GGATGAGCCAAGTGGATCAAGGCAAGTGGATTGTAATCCCATGCGCGGTTCAATCCCGTCTGTCGCCATCCCATTTGCAAAATCCAAAAATGCAATTTCC  
ATATCTAGTTACGTTATTTACTTACGGCGACGAAGAATAAACTACTATATTTTTCTTTCTAGTTCTTCTTCCAAAGCGCAGGATAACCCCAAGGGTTGTGGGTT  
TTTTCTACCAATGGGGCTTCCCTCACCGCCCCATGGGGTGTCCACAGGGTCTATAACTACCCTCTACTACGGGGCTTACTAGCAACACTTAGACCCG  
GCTCTACCAAACTTTTTGTTCAACCAACTACTCCACTGTCGACTGTTGCTAAGCAGTTTTGGATACCAACGGACCTCCCAAGTGAATCTTAAAGTGGC  
CGATTTACTCTTTTGAATCAGTTCTGCTACAGCAGCTGCTGCTAGTAAATGCCACCCTTCCAGTGTGATTTCTATGTTATGATGGCGTCTGCTAAGGGCATAT  
CGTTGAAAGTAGATTCTTTCTCTCAAAAACCCCTCCCAACTGTACAAGCTTCTCAAAAGCATAACGGCTTCTAGATGATATGACGATCTAGACAGATGGAT  
CTTATATGAATGATGATGAAGTACCACATGAGTGAATATAGGAAAGGAATCCAATCTCGCGAATCGCTCATGTTATGATCTTACATCTAGGTTCTCCGCTCC  
GTCATCTGGCTATGTTCTTATGATGATTCAGATCGAATGACTCTATGAAATFACGTCGATACTCTACATATTAGGTAACGTAGGAGACATCCCTATTTCCCCGGG  
GGTCTAATTAACACTGCTTAGCTTCAATTCGCTCTGACCATCAAAATTAATGTAATAACCGTCTCTCTCTTTGAAACAAGGGGCGCTTCCGTTCTGTGCTGCT  
TCAACAATTTGCTTCTCATATTACATATCTAGATGTAATAATTTCTATGAGGAATCTGAACTCAATCAATCAATGCTGCGGTTACTCAACAGTTTCTGTTGAGGTT  
ATCCGTAAGGATGCAAAATGGATCAGTATGATGATTTCTAGTTTCTGTAACCAATTTGTTACTTCAATFACGTAATCAATAGTTCAACCGACTCAAAAGT

agggcattfcccattgatafaggaactttgtaccagaacaatagfatctccaattatagcccctctgggatgtaaaafatacccttctccaccatcccattgtaga  
gacaaatgtacgcattcagtagggctgattctatggtfacgattctaccagatagctttttgattccgctgaaaatcgaatttacggtatagggccttatgacctccc  
cctctatgccttgcggaatgattcctctggaattacgacctfaccacaacggctgccctcatgatcaaaattttcgtggattggattcacttgctctatctatggttcc  
cttgcgtgtgctcgggataggtgtttgtataaatgttccgccgtattatagattctcctttatgtttttctctatctagaaagtgaataaaccgggtggaagggtg  
atgacatacgtctgtaatgattgtagctcgaataggccctctctacccttccgggtgctgtaggctattcacgctactacctaaccacaaagaagagt  
tcgaccaatgctttatttctgctttagtgaatccgattcgaatataaaatgattcttcccaataaacgaagactttttctgtaatactgcgtattgattccatc  
cataaatcgaacttccctctatgctctgagttccagatcgaataaattcgaattctattgtcttatgtatgtagatgaatataccataccaattcgtatgtaggtagat  
ggatgagattccatggatagagagccagttccaatagacttatggaacgttccggctcgcgtgcattccagcagggaattgaaccgcgaatttaccattatgattgg  
gcgcttfaaccattcagccatggatgctaacagggatcctgacatcgtaaataaccaattttcatatagaagacatatagaaaaatgaaatcgaatattc  
gagatggcaaatattcggagatgactatgaaaacacctctctggatcctcgaattgaaagagagattgagagggatccagaatcctaattctcgtatttggatgga  
tccaattctattgagctgactcatagtgactttcttttagcaagaatgacctgttattcaaaaggattgaaacaccgggatccgttacttatgatacctattgaca  
ttgatacaaggatctaataatgagttatagatccttttagcagaagacgtatattccttctcactatctatccaaacctcgtatgggctaatcgttttcat  
ttaccatctcagggaatccttttcttccgcttagccctatcgggtattttagtagagttctataggaactggacgactcatttggtaaacctaatgaaaatc  
ctatttctcttcaataggtacgagggcttcttaccacaagaaaagacgaagacaccttttcttctcactatctaggggttttacttggaaaagacaatgttccat  
actaaaggattcgggtccataaccagattccagtgctactagatctgtgacacttagcaacgagccctatgaatagacatagaattttggctgggaaatc  
aatgaatcattgagtgaaaaaggagcaagaatgacaaaagacgagactctactagcttctcactctgtggttctcctggttcttcttaccggatcttcttca  
tggttctcactctgcaactcgcgatttccgagagaaccaaaatcaagttggggaagatcatttgggctgcatagtagtattacccttgcgaattcgcggttca  
atctatccgattcttatttctcaaaagacgaataaaaccccttctcgaagccctttagtaagcttccctggatctgggaagttcttctcagctgattgggatc  
ttgatcgtttcctttagcactattggtcgtcgcctcaagatcaacaacagggttcgcaaacaaaaggggaaatcgtagcacttttctctgctcgttaaaaa  
aaagcctttacgcgagacaatagaggttgggatacctctatctctgagcaacctcttttggattcttaagaccaccttgcagtaggataaccgctcgttgggtc  
tttattatattctccttccgagggatttttagatcgttcaggctatattttagtctatttggcttttactgtctcctttctcagggaaagtgtaaggacctcagaagataga  
ggagagcggcagcagatttccggaatacttctacgggaatgctcattgaatgcgacttccgtattatgccttgaagaggactcgaacctccacgctcttttag  
cacgagattttagtctcgcgtgctaccatttccatcaaggcatcttgaagtgaaatcatttccatgaatagatactatctaatgtatatttgaagtgaaatcgt  
attccatgaatagatactatctaatgtatagatggaatagatgacaaaagggtggagcttggagatttctgacgacggtcatatagggcctgagtcagacatcaata  
gcttcgatttgcattatccgtaggacaccttatatgatcaaaatcaaaagatgtacaatcaatttctcgaatcaatagaagcccaagagggtcagatggtacc  
ataagagatgagatagatgcaaaaagcaggtctgattacacctattcctaactcaatagaaatgaaagacgtggggatttctatgtaaacagatctatttccat  
aggctcgaatgaccttctcataataagaatgtgcacggtctgtccggtatgaaatgaactataatctgatgacgagtcgattccatgattataagttcattaccct  
agcggccattcccttttggcggcaacagatctactaattcttttattccagttagtaagaggatcttgaactaagaaatagacctagcagctaaaaggggatcct  
gagcaattgcgaagatgggttcttattctggtatagtagatgctatcacacatacagctcactcaattcgaatggaatttggatctaaaggggatctctata  
atttgcacataaagggttatttcttggtttctccagtcattaataactgactattttagataatagtagatagaagaacgctcgaaggagctctattgaaaccaag  
aaatagggccttcttccatccacaccagaatagatagattttccgaagaacctgctagtggaaggagccctcctaggataagagacatagggcctaagag  
agagccaaaaaaggatcttctgtatataactcgcataatctcgaatgttatcagttccgggtacgtagaccaataatacaatgcaagcaaaagttcctagattcag  
agatagaaaaagcatataagttatcagcttgcataatccatctttagtctcacaatatttccaaataattacataatccgatttggccctatggacgaatagcaagcat  
acgttctcagcttggtagtaatgcaaggagattcccaatcatgctaaagaatagctaggatttccagaagaagatgccattcgtttgatgaaaataaaaaggga  
atctcagaaatcgcgtggctgaagctgaagcagcaacttccgaagtaacaagaagaagcaacgactggagtgggggagtcagagtcgaaaaggattcct  
cgcttcttctctcagcaaaacctgcatgagacttctcgcacggctcctaagtataaaagaagaagaacttcttcttcttttatttatttcttctcgcgtat  
gtataagaccgaatcattcttttgaatcgaattcgaaaaagaactactaacttcaacttttctgaggaaatccttctcagtggttgaatgactgacttttcaatcct  
ttcacttgggtccgtaggcaagctgaaaggtgagaatagaaccatctgatttattcgttcccaatagccatgagatgacatcttaggggtatccttttgc  
ctaccgtaataacgagcttgcgaatggatctgtttatcataaaagattcgttcttctcagcttcccttcaacttatttatttgaacaaaaagatcacaataaactt  
tggtaaaagtcttcttggctggagtggggatagcatttctcttctcagatctatggagtttgcgaaccccaaacacctcagagatagatagaggtagggaattt  
cgaacgaaccacactcctcgtagactcagggatcattgtagaaaaagggtcgggaaagcttgaacccaagctcactacagtgatgataaagcgaattgaa  
attcctgggggattatacatttgtgattgataagaccgttcaaatcttgaagctcgtatcctccccccagatgaacctatagccaagagaaccatgaaccagaa  
tagaagagcttgcaccaccatgagtaaatattcatagtagcctcattagaccgtatgctcttggatattccagacaataggtggaacataaaactgaacattct  
ggagctacaagaatagttataaactgtagcaccacataaaaacttccccctagagtagctgttaatacgaataacagaactctgttatagccatttctgtacattca  
atgactctacggatagaggaaatacaaaagttgaacataataaaataagaatgaaagattcgttgaattgttggaaatttcccgaagcctaattataggtt  
cttctctccatcggaaacaataggccgttattgcttattactaaacttgtgaagagatgaaatagaaccaaggctatcttttctgacagaggtaaatcgaatcagaa  
gaagaattagccaaaaataggatacttctgggaaaatgaaactccttgaagagaagcaaatgaaacgcttccataaaaattctcgtagaatcgaatgaag  
tttctattctgacatgccagatcaatagtaactgacccaatctccgaaaagctccgatttctgatttttggatgggatatttaccggaatccccatgaataggat  
caaaccttattccatgctatttccataagattccttcttattcttaagcaagccccgagagggttattgacatgatttctgttttcttcttcttcttcttcttctg  
agaagatctgctcgaatccttctattgattctttccgacgagatgtaggacatggtctacatacctagattctgttcatgattaacgaaaatgtcgaagagc  
tctatttgcctcctgcaattctatgagctccttcttctgctatggcaccctcccttggcagcactactaattcggaaactaatttgaagccatatttccgaccg  
gacgcttttgggatgcttcaataaccaacgaatgcaaggtccttcttcttcttcttcttcttcttcttcttcttcttcttcttcttcttcttcttcttcttct  
cctatattgggagttactctacgattgcttgcgtaaaaccaatagtgatttcttcttcttcttcttcttcttcttcttcttcttcttcttcttcttcttcttct  
ttttccgttctcataatcggtaaccaccatgtaactaactgattcagaaaaattgagcggatttgcagttcttttctcagtagctcgtacgacatgagcgtgga  
aagaggttcaagaatccgttttcttataagggtcaaaaacgaatcactatttttggcttttggacctattttaggttgatctcgaagataggaagatctcc

ctccaagccgtacatacaactttcatcgaatacggctttccacagaattctatagggatctatgagatcagatfaggaattcagttactactfaaattgagatccgtt  
tccctcttttcccgctagatcggaatcctgtattttccatafcataccatcaagtccttaggttccgaaatagtgaatgaaaaagaaggtctcgaatcattgct  
atftgactcggacctgttctgaaaaagtcgaggtattcgaattgttggacacggacaagaagggaaaaccctgaaagaattccatattgacctggacatat  
aagagtccgaatcgaatcctttagaagaagatctttgtctcatgtagcctgctccagtcaccttacgaaactttcgtattgggttagccatacactcacatgttc  
tagcgattcacatggcatcacaatgatacaagcttggataagaatcacaacgcactagaacgccctgttgacgattcttactgcgacagcatagggctcct  
cgaataatcgatatacaccgggtaaaccttaacccttccctcttactaactacagaatgttctgtaaattatggccaataccaggtatataagcagtgatt  
caaatccagaggttaatcgtactctgcaactttacgtaaggcagagtggtttttggggtgatagtgaaaaagtcgacagataagtcaccttctgtccctctac  
agaaccgtacatgagattttacccatcagggctcctgttcaattcttgaagggtaccttttctcgttcgagagtcctcccttctccactccgtcccgaagact  
aactaagaccaattgagtcacgtttcatgttcaattgaacactttccattatgattaaaggagaagattgtcttttaccacaatatgaggatcaaatcacgtctataa  
taagaagaatctttctcggatcaatccccttgcctcattctttgagaatcagaaggatccttttcgagttccattcttatttggaaatcgggctcttctatctcga  
ttatttttttctttattctttatttttctttcgttttccctcttctctatccctatccttaggtacagcgttgcacataagagaacctttcctctgtatgaatctat  
tattccattccaattctcccgaacttcccagaataatcccgaattggatccaaatgacggggttaattgtgagcttatccatgagggttaggcacttcaaatagga  
atccatttttaactggcttctgtctttgtgagtcgtccgagatccttctgatgacctatgttggtaaggatctatatgatccgatcgatcgaatagaccgc  
ggtagcaatagaacggggaagatatacagaaaaagacagttctttcaattcgtattatctatatattagttcgtttctattctatataattagattagttga  
gtagctattctattagttagcgtaccggctctgtgagttcttctctgtgatgaactgtcggcaccagtcctcatttttctgtggaccgaggagaaagggtggc  
tcagcaggaagaggtgattgtaccatgagaagaacacagaggtcaacccttcaaatatggaacatgattctggcaatgcaacgtagttgggtcctacatcgtacc  
gaatgaatcagctttctacagaggtcaatctttgcctattagcagaagagatagcaagttcgaattctgtctggtaggacatgatttctattactatgaaatcataa  
atgaaatgaagtagttaatgggagggctaccattatcctttctgtatgtttcctaaagagaaggaattgtccattctatttctgaggtctcaaaaaaggcgtgg  
aaacagatagaactctggaatggaaattgaaaaagaatgtagccccagttccttggaaatggtaagatcttggcgcaagaagaagggtggcaccatcatct  
tgacttgggtctgcttccctcttttttaagaataccgagtcgggttcttctaccagtatcgaatagaacatgctgaaacagatcttctcatggaacctgctcga  
agatcgggaaaatcgtacagattttatgaaccatgtgctatgctcgaatccatagtcactcattttcgtataggaccggtgacaattgaatcaattttccattat  
ttgactatccataatagttggaagaaagcccggaaggggtggccttggattctcgtcccttgccttaggattcgttaattcttctcgtaggggacgggga  
gggataataactcagcggtagaggtcacctgacgtggtggaagtcacagttcagcctgattatccctaaaccaatgtgagttttctattttgacttactcccc  
gccacgatcgaacgggaatggataagaggttggggtgacgtgataaggtaggggtgctatactgctggtggcgaactccaggctaaatctgaagcga  
tggatacaagttatccttgaaggaagacaattccgaatccgctttgtctacgaataaggaagctataagtaatgcaactatgaatctcatggagagttcgtactgg  
ctcaggtgaacgctggcggcatgttaacacatgcaagtcgaacgggaagtggtgtttccagtgccgaacgggtgagtaacgctaagaacctgccctggga  
ggggaacaacaactggaacggttgcataaccccgtaggtgaggaacaaaaggagaaatccgcccaaggaggggctcgcgtctgattagctagttggtgag  
gcaatagcttaccagcgtatgacgtagctgtccgagaggtatgacagccacactgggactgagacacggcccagactctacgggagcagcagtggtgg  
gaaftttccgcaatgggcgaaagcctgacggagcaatgcccgtggaggtggaagggcccagggctgcaactcttttctcggagaagaacaatgacggatc  
tgaggataagcagcgtactctgtgcagcagccgcgtaagacagaggtgcaagcgttatccggaatgattggcgtaaaagcgtctgaggtggctttca  
agtcgccgtcaaatcccagggctcaacctggacagcgggtggaactaccaagctggagtaggtaggggagagggaattccggtgagcggtgaaat  
gcattgagatcggaaagaacaccaacggcgaaagcactctgctggccgacactgacactgagagacgaaagctaggggagcaaatgggattagagacc  
gtagtcctagccgtaaacgatggatactaggtgctgtgcgactgaccctgtagctgtgtagtaacgcgttaagtatcccgcctggggagtagctcgaagaa  
tgaactcaaaaggaattgacggggccgcacaaagcgtggagcatgtggttaattcgtatcgaagcgaagaacctaccagggctgacatccgcgaatcct  
cttgaagagaggggtgcccctgggaacgcggacacaggtggtgcatgctgtcgtcagctcgtccgtaaggtgttgggttaagtctcgaacgagcgaacc  
ctcgtgttagttgccactatgatttgaacctgaacagaccgccggttgaagccggaggaagagaggtatgagcccaagtcacatgcccttatgcctgg  
gcgacacagtgctacaatggcgggacaaaaggtcgcgatctcgcgaggggtgagtaactcaaaaaccgtcctcagttcgttgcaggtgcaactcgc  
tgcataagcaggaatcgtatgtaatcgggtcagccatagcgggtgaatcgttccggccttctacacaccgccgtcacatataggagctggccatgtt  
tgaagctattacccttaaccgtaaggaggggatgcttaaggctaggtctgactgaggtgaggtgtaacaaggtagccgtactgaaaggtgctgctgatca  
ctccttttcagggagagcctaattgcttattgggtattttgtttgacactgctcagcccaaaaagaaagcagctacgtctgagctaaacttggatatggaag  
tcttcttctgtttagggtgaagtaagaccaagctcatgagcttattatcctaggtcgaacaaatagttgatagtagatcccctttgacgtccccatgcccc  
cccgtgtgtgtggcggcatggggatgcaaaaaggaagggtgaggttttctcgttttggcgtagcagcctcccaaggaggccgcgacgggctatt  
agctcagtgtagagcgcgccctgataaattgctgtgtgctggctgtgagggctcagccacatgtagttcaatgtctcatcagcgcctgaccgaa  
gatgtgcatcacaagcaccattagcatggcgtactcctctgtttgaatcggagtttgaacaaacaacttctcctcagggagatagatggggcattcaggtg  
agatcccatgtagatctaactttctattcactcgtgggatccggcggctccggggggcactacgctcctcttctcagaatccataatcccttattcagttat  
ggagagctatctcagcagcaggttgggttctctcaatgggaaaatggagcacctaacaacgcatcttcacagaccaagaactacgagatcccccttctcatt  
ctggggtgacggaggatcgtaccatcagacctttttctatttccggcggcttggagaaagcagcaatcaataggacttcccaatcctccttctgaaag  
gaagaacgtgaaatcttttcttccgagggaccaggaaggtggtatgaccataagagaatgcttggataaataagccacttctgtctcactcctaaag  
cactacgagcggcctgatcagtgcaatgggatgtgctatttctatctcttactcgaatgggagcagcaggttgaaaaaggtatctagatgctaggggt  
tggccaggggtcttaacgcttcttcttccatcggatatttcccaaggactgcatggttaagggggagaaggggaagaagcacttgaagag  
cgcagtaaacggaggttctgctgctcgggaaggtgaatcgtcccgaaaaggagctattgattctcctcaattggttgatctaggggctgattta  
cttcagggcggaggtctgttcaagtcaggatgcccagctgcgccagggaaaagaatagaagaagcatctgacttctatcactaccacttggctcggg  
gggatagctcagttgtagactccgctctgcaattgggtctgtcgttaccgggttgcattacgggttggctgtctaatgtccagcggtaaggtatgtactgaaccg  
gtggctacttttcaagtaatggggaagaggactgaacatgccactgaaagactctactgagcaaaaagatgggctgtcaaaaaggtagaggaggtaggat  
gggcagttggtcagatctagatggtatgacatgacgatagttggagtcggcggctcctaggtcctcctatctgggatccctggggaagagatcaatggg  
cccttgcgaatagctttagtcaactatccttcaacctttgagcgaatgtggcaaaagggaagaaatccatggaccgacccattatccaccctgtaggaa



ctacgagatcaccccaaggacgccttcggcgtccagggtcacggaccgacatagacctgtcaataagtgaacacattagccgtccgctcgggtggc  
agtaagggtcggagaagggaacactcgttctfaaaccagcattcttaagttaagatcaaagagtcgggcgaaaaaggggagagctccccgttctggttct  
cctgtagctggattccccggaaccacaagaatccttagaattggattccaactcagcaccctttgtttgagatttgagaagagttgctcttggagagcacagtacg  
atgaaagtgtgaagctgtgttcgggggggagttattgtctatcgttgcctctatggtagaaccgtcggggaggcctgagagggcgtgttaccctgtggcggat  
gtcagcgggtcagtcgcttattcctcagcccgtgaactagcggatactatgatagaccgaattttgccaattcggcagttcgtatctatgattcgcattcatggacg  
ttgataagatccttccatttagtagcaccttaggatggcatagcctaacgttaattggcggaggtcaaaagaggaaagcgttgcggtggataccttagtaccagaga  
cgaaggaggcgtagcaagcagcaaatgcttcggggagttgaaaataagcatagatccggagattcccaaataggtaacctttgaaactgcctgctgaatccat  
gagcaggcaagagacaacctggcgaactgaacatcttagtagccagaggaaaagaaagcgaatccgtagtagcggcagcgaatgggagcag  
cctaaacctgaaaacgggtgtgggagagcaatacaagcgttgtgctgtaggcgaagcgttgagtgccgaccctagatggctaaagtccagtagccgaa  
agcatcactagcttgcctgaccgagtagcatggggcacgtggaatcccgtgtgaatcagcaagaccaccttgaaggtaaatactcctgggtgaccgat  
agcgaagtagtaccgtgagggaaaggtgaaaagaaacccccagttggtagtgaataagaacgtgaaaccgtgctgagctccaagcagtgggagggggaaagtg  
atctctgaccgctgctgtggaagaatgagccggcactcatagggcagtggttggtaagggaaacggaaccaccggagccgtagcgaagcagcttcat  
aggcggattgtcactgctttagaccggaacctgggtgatctatcatgaccagatgaagcttggatgaaactaagcagaggtccgaaccgactgatgttgaaga  
atcagcggatgagttgtgttaggggtgaaatgccactcgaaccagagctagctgttctccccgaaatgcgttgagcgcagcagttgactggacatctaggg  
gtaaacgactgttccgtgcgggctgcgcgagcgggtaccacaatcagggcaactctgaactagatagaccaaaaataacaggggtcaaggtcggccagtg  
agacgatggggataagcttcatgctcagagggaaacagcccgtaccagcgaagccttaaatgaccgtcagtgataaaggaggtgggggtgcaaa  
gacagccaggaggttgcctagaagcagccacctttaaagagtgctgtaatagtcactgacgagcgccttgcgctgaagatgaacggggcctaagcgaatcgc  
cgaagctgtgggatgcaaaatggtgagaaatccaatgccccgaaaacccaaggttccctccgcaaggttcgacgggggtgagtcagggtcctaagcagggc  
gcttgagtaacgaaaacattggtgagaaatccaatgccccgaaaacccaaggttccctccgcaaggttcgacgggggtgagtcagggtcctaagcagggc  
gaaagcgtagctcgtgacaacaggtcaatattcctgtactacccttgtgtgacggagggacggaggtgtaggttagccgaaagatggttatagtttaag  
gacacaaggtgacctgcttttcagggtgaaaggggtagagaaaatgcctcagccgaggtccgagtagccaagcgtcagcagcgtgaagatgagccccgtg  
gactagccattgcttccacgagcctcataccagcgcgtacggcgtgaaatgtaaccatgccatactcccagaaaagctgaacgacctcaacaaggg  
ggtacctgaccgaaaccgacacaggtgggtagtagaatacttagggcgcgagacaactctcttaaggaactcggcaaaatgccccgtaactcggg  
agaaggggtgccccctcgaaaaagggggtcgcagtgaccaggcccggcgcactgtttacaaaaacacaggtctccgaaaagcgtgaagaccatgatgggg  
gctgacgctgccagtgccggaaggtcaaggaaagttgtggaactgatcacagggagccggcagcgaagccccggtgaacggcggcctaactataacg  
gtcctaagtagcgaattcctgtcgggtaagttccgaccgcagaaagcgtaacgatctggcactgtctggagagagactcggtaaatagacatgctg  
tgaagatcggactacctgcactggacagaaagacctatgaagcttactgttccctgggattggcttggccttctcgcagcttaggtggaagcgaaga  
aggccccctccggggggcccagccatcagtgatagaccactctggaagagctcggatttaacctgtgtcagaccgcgggccaagggacagctcaggt  
agacagttctatggggcgtagcctccccaaaaggtaacggagcgtgcaaaaggttccctgggccaagcagcgaacattggtcctcagtgcaaaagcagaagg  
agctgactgcaagactccccgtcagcagagacgaaagtcggccttagtgatccgacgggtccgagtggaaggccgtcgtcaacggataaaagtactct  
agggataacaggctgatctcccaagagtcacatcagcgggaaggttggcacctcgtatgctggcctcggccacctggagctgtaggttccaagggttgg  
gctgttcccaataatgcggtacgtgagctgggttcagaacgtcgtgagacagttcgggtccatccgggtgtgggcgttagagcattgagaggaccttccctagta  
cgagaggaccgggaagcagcaccctcgtgtaccagttatcgtgcctacggtaaacgctgggtagccaagtgcggagaggataactgctgaaagcatataagt  
agtaagcccacccaagatgagtgctctctcctccgacttccctagagcctccggtagcacagccgagacagcagcgggttctccaccatagcgggatggagc  
gacagaagcatggaataagataaggtagcggcagacgagccgttaaataggtgtcaagtggaagtcagtgatgatgagcgtgagccatcctaacgaacg  
aacgattgaaactgttctacacgacctgatcaaatgatcagccacttccatctatcttcaacttctgatgaaaagatgaaaaacaaaaaaagctc  
tgcccttccatcttggatagatagagaggaggcagagggccttgggtccttccagcaagaattggggttcacaactactagccaataatctctcatgctt  
cctgctcatggtcagattctggtcctagcgtagaggaaccaccaaaccatcccgaatttgggtgtaaaacttactgcggtgacgatactgtaggggaggt  
cctgcggcaaaatagctcagccagaatgataaaaagctaacaccttatttacttcttactatgttgaataacgaaaaagatcacaatcacaatgcaaaaggtc  
gtctattcaaaacctcaatcaccatccctctcctccactcaccctcggaacgcactgttcttatagagagaaggggcttccacttcttaaccgaaatgaa  
atggctgagagagggaggttcttgggggtaccctccgcaagagatccagtgagacgggggtggcctgtagctcagaggttagagcagctggctacg  
aaccacgggtgctgggggtcgaatccctcctcggccagccttccaaaggggaaagggccttcttccctgagggtaggaaaaaccatgagggatagcgg  
acgtaaaagctattgaaactgggtatgctcttcttcttctgcaagtggaactgtagaacagaatgtgatacagtagataaaaatgcaatgaaacaaggatagcgaac  
gggttacctactcctaagggtcaaaagcaagcccttaattcaattcttattcttactaataaagaatgaatcaaatctcccaagtaggttcgaactacgaccagcag  
ttaacagccgaccgcttaccactgagctactgaggaacaaggggattcgaactcctagatgtaactcccgtctcaaccatgaacaatatgagtcggaagctt  
cttctgaactcccgaatttctgtagtgctccgttccatgctcattctataggtaaagccagagtgctctatttcttcttcttacttcttagcacttctatcatt  
aataatccatcccttggcttattgacataagagatgctattatagctatcttctatataatgaaaagcaagaaatctcagcaaacatcagaaatgtgcatatag  
aaaactcaaaagaaagaaaaaggagaccatgcatgatttcaaatcttcttacttagtagtcaagttctcagtaggataatattcggctgttgcggcggga  
ctctattatgggttctgaccacattcctcaggtcctcttagatcttcttccaaacttggattagggaaagagagatattcgcactcctggtgttctattatgg  
ggcagctcatgatctcattatgatctattaccctctgcatctattcttcttagcctaaccgggtggaagatccatccaatttgggtatattatgactcaaaaacgg  
atctgaatgtgactgaaatgcagatctcagagatcactttcacgatacctaaaaggtggaatagcgaatttcgaaccatttctataagagaaggttccattac  
ttgagaatggattctatcaaaactatagctattgcaataaagaagaaagaaactaataagaagtcgaagcgcggaatggtagtaataagagagaagattcttct  
ggtttctgttctgaaaaatattctatctctctagacgccgtagaagaatgagaattctatgcttcaattctctactcgtaatggaaagttacggaaggagatcc  
atcttttgaatgaaaactacataaaaaactcgtgacaattcgaatcagggcaagcgtcttaatacatatgcaaaaaattcatttggccaccattgattagaag  
atftaactgtatgaatcgtattggtttagacgaataatggcagttgttccagatgtaaggatacagatgatccacaattcatttaggtacttaaatgccttcttca  
taccatattctatcccgtgaaatctcagccgaaagatggatgcatatgctatgttctatttgcataatgatcaataaacgggtgatcaattccataaattggat

agcafaaataaatcagcaaaatctttttagatagaagaaaagtctctatcfaaaataaaagaatgtaccctctatccaatccaattgcatcgataaaataa  
atccaaatccagtagtagaataatgcaaatftttgtgtacgagattagaataactcaaaataactgacataatfttttctgatcagaaaaatcatgaa  
aaagaaaggaggtgaaaaatftttgattatggttaaaagaagaaaaagaagaaactggggtctgtgaattcaagtattcagttccacaaatagatcggaga  
ctgctcacattggaaftacacaaaaagattttcatcgaaagaggtctccgaagactfttgggaaaacgtcaacgtttgctgcttattggcaagaaaaatag  
agtacgtataaagaataatcagtcagttggtatattgggagcggtaattcatcgttcgaatfttttctattttatagtagcttatagtatgcttattgcatfttgat  
gagcctgtttgaggaaftcatggaataatcattttcatggaataatgaattaaggaagaaaggatagctaccgcttacaagaaaagatcctatgatagtcaat  
atggccctcagcaccatcaatgcatggttctcactgactgactgttactctgatggtgaagatgttattgattggaaccatattaggctatttacacagaggaatg  
gaaaaatcggcaaatagaaaacttaggcagagataggggaattccttaagaaagaaaaagaataagaacacagataacataaaaaaagaata  
aataagacgaaatcgacctccccctacatatttatttctctctatacaaaaaactgcaagacctaccattggttaattccatcaatgacaccttctcgaaaaact  
gcgttagtctggttaatcctcttataaccaaggtaaaggctctagtatagaaaatctataaacccgattatgaccaactatatactttttttttagtgatgaaaa  
aatacttttctggacccccctttacaaggaafttataaatccaaactctgaaaaaaagagtaagcagatccataaaacatatactgatgaatagacaaaaatagcta  
gactfacaagaatgcattagtgataaattcatatgaattttggaagaatagaacttcttggaaaaagttagtgagggttagccactttgataatggttaa  
ttcccctattcattatcaaaatggattcctatagatccaataaacaagtaacaaagcagtaataaagaagaggaaatagcatattcccgggtcatgagataga  
caaaagtgttttagtccccatgaagtactaaaggacctatccttctgtataacatgaatfttggatagatttggaaaaaaagaactccactctcgtgtt  
gataaacgaaatcttattgactcctttgatataccttttcccataacgataatgaatacaacgaactccttttagtactactgaatftgaaatgaacacgcaaaatc  
ccatcaaaagtaagtaataatcggaaacataaaaaagcagtaaatctgcagtaaaagaagctattttccaaaaaagggtgaatataaccaactattactaagga  
ttcatcttggaccagaagcaagcaagaggtggaataccacaagagaaagggtaccataaaaaacaagttcttgaattggaatgattttcttaaaccccat  
aagaaccatattctgactttatctgtgtaataccaacatatacctagagctaacatcataaacccttaagagacattgtaaataggcttaagcattatcctgagca  
atcaaatggaaataaagcagcttgataaagacatatacctagagctaacatcataaacccttaagagacattgtaaataggcttaagcatttcttaatactctgagca  
agagctaaagtggctcctaaagaaagtgttagtcttataaagaatgaaactcattatcaaggttagggatagaaaagaggaagatcgaactataagaa  
aaatccccgcagcaaccatagttgctgctgtataagagctgaaatgggggtggctcctcatagcctcggtaaccatagcgaagaggaatggtccgattt  
gcaactgcaccaaggaataataaaaaagcacacaaaatagtaagcaaggagttaatctcattattaggaatccagttatgctattttaaacaatccgaaactcta  
aactacctgtatcaaaaaaacctagaatcctaataacagacaaaaatccccctacacgattagttcaaaaagccttttgacaagcactcgtgcaatfgccgtgta  
aaccaaaagcctatcaataaataaggaacacattcccacaagctcccaaaaaataaattgtatcaaatggaactagtaaccaatccaacatggaagtattgaaa  
aaactatataaacaaaaaatctcaaatatccctcctcgtgagacataataatcactataaataagaaccaggattcctacagtagtaattagtaataacataatagaa  
gtaagcgggtcgattaatgatacaaatctaaagaaaaatcattatgacgggtccaaagaccatagatattgatagatagaacttccattattgttgaatagacaggtga  
actgagaataccatagctatactataaagtaaaactagggaaaagcccatatgcgacgaagatttttggctgttgaacaagaaaaagccaaacccattgac  
ataaactggaagtgggagagagggattaccatgcatattgatattgtccataaagaaagaaatgcaatftttactgaaaatfttactcaatftttctataaa  
attgaaaaaagtccgattcaccaaaactaattctatctatttctgaaggataaaaaaataactagaatcttaatftttcaaaaatfttctcattgaaacatcaaaaaataa  
gaataggtttgttgaatgcaaaaagtaataaataactcgttaccatgattactcaaaagagacttttataaaaatacaaaaaaagattgaaatcatttactt  
taattttttgtatataaataagcagctccctgtttcgttaactcaatgattggaatcaattctggaacttttaataactattgattgaaatfttcccttctttatcctc  
ccgtctataggggataggccccatccttatactgtatattggagagtatacttgaataataaattgatttaaatagaaaactttgtatattctatattataaaac  
aaagtcaaaaaaataatagaatattgtaaaaaactctgtcttaccgattagacaaaatgaagtaaaaaagaatcagaatftcaatattcttttagtatcaagtataaa  
tactaagaaaaagaagaagatgattgattgctggcaatagatgctttcacatacaactagaaaaaagtaatttcttttgaatggcagttccaaaaaacgactt  
cgatgcaaaaaagcgtattcgtaaaaatcttggaaagaaaagacttattttccatagtaaatcttattcttttagcaaaaatcaagatcattttctggcgcagcagca  
tccaaaaccaaagggttttctcggcaacaaacaaataataggggtttgggataatgaattgacctatccccaaaaaattcatttataatgaataatg  
gaataataggtaataatgattactttatgtcgaattctcggtaacatattctagaacaaactctctgatataaaaaaagggttttggataactgtgacct  
aaatattctttctatcaatgaactttcgaatagaatcgtataataaaaaaagggttctattatgaaaagtagattctgcataaagacttacaacttcta  
cctattcttaataaatacaaaaaaattgattctatattgcaactgagaaaaaattgtccaacttccaagttctattggcaagcaagaatftttgttaaaaaat  
tcgcaacgatactaccaaacgaagctatttfaatgaagattctaattgtcctaaatctatggaatctccaatctcagacttccgcgagaaaataacttaataatcttfaat  
aaactattattcaacttagccgcatggtgaaattgtagacacgctgctcttaggaagcagtgctcaagcactcgggtcagtcaggagtgccgagtcgcaatc  
aaagaatacaatagattataaaataaaatggattcaatcgaatfttcaatgtaattgggaccttctcttattgctattgcaactttagaacataactaactatattc  
tttctcaacaatftcaattgtattacgattcatttaaaccttattatgctggaacttgggggattgcgtgattcgtcagaaaaaggaatgatagccactttttctgata  
acaggattctgatttctggtggccttctcgggacattttcattaaagtaatttatagtcattgacttcttctcatgggctctgtatattctcatgattcctaagata  
cagaactcaaaaatgatttaagcacaataactacgccgagactatttaacgaaagcttggccagctcggcttfttaactgaaatgcatcaatccacaataactagt  
acctgctcacaatcagtggttaatgatgcatgctagatgattactaaagctatgcgacttfttggcgatccttattatccgccctcttctaatgattagattc  
aaagaatttagatttcttcaaaaaagaagaaaaatgtttgcctaaacattttcttfaatgagattgaaatfttctatcaaaaaagaggtttaaagacaccttttct  
cttatttccaaatattacaataatcaatattgagcgtttgattcttggattctcgtctcattagctagggttacccttttaaccataggtattctttggagcagat  
gggctaatgagcgtggggtatcctactggaattgggctctaaaagaaactgggctatttacttggaccatattgcaatftattacatagtagaacaaatccaaat  
ggaagggtacgaagtcagcattttagctccatagatttctataatftggatctgtattttggtatcaatctattaggaataggtttacatagttatggttcattacatta  
cccctcaatgattacatacaataaaccttaataaaggaagaaacttccattttgtttgatttgaaccccttgaacgcttctcaaaagggttcaaaaatc  
gagatagatcaatfagacttfttactttttgaaatfttttagtatttccactatggaatataagcggactagtagaagaaaaaaatcctatttagataaataatggat  
aacagagccttaccctgtcaacggatagcagagaaacaaactggataaataaccgattccttactggtaaaaagatacagattaaaagaaagagttctcggg  
gccggaatcctcaaaatftcgtttggaacatgaataagcttattccatagaactctgctgtaacatagataataaataaaggagtaataatcattccaattgccatt  
acaaaaagtaattagcatttttggcattaacgaatfttggactagtaatgagtcacaaaaaataactaactccgcaacaaaaccactattcctgtaaggcaagaga  
agccattgaaaagctactaaatggtaaaaatfttggcattgggatagaaacccctccagttctcagataaacaaggcgcattctacacaagccgttcccct

aagaaaaaagtgtagcccaataaatccatgggataatattgfaaaatagctccattgagtcacatgttggttatggaaccaattctataataatgaacccatgtg  
agagacggaggagtaggctattctttttgaaattgcttgcccaagagaggtgaaagctgcatagattattgcatcgctctattactaaccaaggggaaaata  
gataatgagcatgaggaacaattccatattgatccgaatcaatccgtatgctcccatcttaataagattcccgtataaaagcatacatgactgtaatgctgctccccat  
gggtatctggaaccacgtatgtaggggtataatggcaattgacagcataagcaataaggaagccaaaaataaatagtattccaatgttgacgggtatgattgatt  
aattaatctttcaaatcaatctgtgctggtggaaccgtataagccatactagaactccgattaagaaaaaaaggaccacctgcagtatacaaaaactttgt  
agctgaatagagacgcctctccccccacatggataaaagtaagtaaacaggaattaattcctaactccacatgataaaaaaaagtaaaaggtctcgcgaagaa  
aataatcctatttgaccgctatacattgctagcatcaggaatagataatcgggaattccgggtaaccggccaagctgctaaagtagctaaagtagctataaatcct  
gtcaataaaatagatcctaataagagtcattgccaatctccagtggaaattgaagacatctatcatttagaatcctcttttaattggattaaggatcctccaatt  
ggaaatgataacagaatgcataagtcattagaaggaaattcctaataacaatagacatagataccacctaagattttgttccccatgaggtaaaaaagaaaatfat  
gaacccgcaaatatcgccaaaacaagaattgttaaccaaggaaaaaagaactcatgataaagtgataagacaagatagctttgaccagaaaagcccgtgctcg  
attttttgagcacagctcttcggtaagaggaatcagacgattcaagttggaattttgtaacgtatcaataagatagagccatgctgagggtgctcaggtccta  
aataaacgcggacactaaaaatctgttggcagggcggattcgcactcttacaacccacacaaatcttcggtcttgccggaagcaattgttgcctttacatcc  
atcccaaggatcatttcaatatactctgttggacaagctcgtacacattgagtgatcctatacatgatacaaaatctttacggaatgtgacattggatctataatcttc  
ttttcaacataaaaatcttgatctggtcaaaatgaaatgactatatacaatcaatgtattgtagaccagacgaagcaatgtttatccaacttcaacaataatg  
caatataattcttaatccgttgtggaagagcaatgaaaagagccaaagagactggaattttggcttcaacaatcataatatacaaatgtatatacaaatgcaattgacc  
aataaattggctatgcttttcaatataaattattgcaatctcaattgcaatatacaatgaaattgcaaaaatcaactaagtaaaaaagaactatggaataacctactc  
aaaaatagatattcacaataaataatgattcatgtaataattcattattattatattgctccctttgttagaagattctatgctaaatattcaaaaaatgattgattg  
atcaggtgatttctattacgatggatggaagaaagaaatggataatccaatgctcctcagcagccgcaagggtatacaaaaaatgcaaaaatgctctctttta  
attggcggctatcaaatagatcagaaaaattgtacgagatttagaattgaattcagataaagttcaaggcattatagagcttaaccatgtttcggctgtgacatcaatcc  
atagataccaatcgaaaaataatagacactcaaaaaaagtacatgctcaaacatcattaaactaactcctatcaatctcgattcattcaaatgaggacaagaattgaa  
ccgattgaataaattagaatgaacaattacacaacaaaagagaaaagaaggtattgttggcagtagatgggtttactaaatcaaaattgtggtcttttagtgatttatt  
tagattgaaattctataattttgactcattcaagtattcttattgccgagccatagtaattgcactatfaaaagaaactagaagaattatgaaatgagttcaaatggaa  
gataaaaatcgggtgctaaatgaatcccaattgttgaacgtatttatgagaccctgttctactattgttggatctgtatgctcaaaagaattccatacatgacgtatctg  
ggatagtagctcattagtgaagaaggaatgtatacaaacgagtgaaaggaaccatctccaatagtccaaaaatcttatcttttagaccattctgagccatttacgaac  
attacggcaaatatgatcaagacatttatagctccacataaataagaagttgtgcccagctcaaaagtaggaattcaataaaatatagaataagatatacaacaa  
gaactaatcctagcgaaaaagcagaaaaatgtgggttggtaagtaataaccaccctagacccttagtagaagaacaaatcccccaaatgacacaagaatttcatg  
tattggcccagtaaatccattatgataaagaagaatataatagataaaatcttcatgaactgactaaaactaaaagattcaaggaaagaaaaagggattagaaatt  
ttttgtatattgataaagttcttctatagtagaaatcacatcacgaaaatctactctggtttaaactcaggaataattgcaataagcagtaggtattcttttctta  
gttagtaaaagaaacttttgattctaaacaaaaaattctagtaatacagtaaacgttctgaattccaagattttctctgctattttactttgagttgaattcctaattgttgaatt  
gtgtaatctccattatggagattggaaccgactcaaaagcaattgattgtaattcaattcatgacgatcataagtagaaaattcattctcagctattgataaacagtt  
gtcggacagctactcaacacaattaccacaaaatatacaaaactccgaaatcaactataaataagcaattgttctcttttaaatcctttcaaatctccaatccacaaga  
ggtagatctatagggcatacgcgaacacatactcacaagcaatcattatcaaaatcaaaagtgattcgccccggaaacgctccgatgtaattgattttcataggg  
gtagtgaaatcgttataggttaaacgattgtgtgggataaggttaattatgaaactttgaccaatgacctgctgcgcgtattgttggaccataactcatgaacccagtt  
taccatagggacaatattcgaatatctatgaaaaaggtatgttcttctctgttggagagaactttgttggaaaatattcttactgattgtattatcttatttatagtgaa  
aacaagttgggaaagattgttaataagagattgccagggaaataggttaaaagaaatctccatccaaagatttaataactgatcattctcatctctgggtaaaagtcct  
cttattgtgatagaatgaagagaataaataagcttttagttaaataagatactattgctattctagaattccaacttttattcatttgaaaaatccaaaaaa  
ggatataaggggaatagacaatccaccgcctaagtagagaactgttacaataaagaggaaactaataaatttaggtaagaacaagataaataaaccatatt  
gataccagaatattcggttgataacctgctactaattctctccgcttctggttaaatcaaaagggttaattcttcacattccgcaagaagaattagaaaaaccagaa  
aacctataggtgacgcaaaagattccataaaaaaacatattttgactgtgctcaactatataactgtacttgaactgttgataatcatagctgacgataaacatc  
acagttcccaccgctattccaaaaccgtacatgaaactttagtttctacagctcctctatgatcagaaaaaggaagactgtttcattctgattatcttctggcgcg  
tagttagaattatcagataaaatcatttcaacgtcctaaatagaccaaaaggaattctgtctgtagaataaaaaaacgcttcggaattcattctcatcttataata  
taattggtacttttcttctgacgaataaacttaactcttgaataaaacactcgtatacaaaataaataaacgaaaaagattgggtattagttcatgagaattctgtatgaat  
atggataaacgacggaaaataaataaagatctttttttgtattgcattccatctttgtcctattcttctccccgaggggtatttaaaaaagaaaaaggaataaa  
gggttaattcgttctgatagccatttccctaacaagtgaaatgggaacatactctggatcggaaatccgaagaaagtactactgtctattccaccaatttcaagtcctat  
tatgattcctttatgaggaataatctaatgcttttagattccctcattactaactctttatgacttttagtgttctaatccctactaacttttgattgattccctatgattaca  
actttctgtatcggaaatcccttattattgccgctcaagatagatgactaatcaaaaaatctcaacttggggtaaaagaatttacaccgcttatgttacttccatttttc  
ttfacataggaatgagatttttctttactacaatfaataagcagttttgttcaactatagctatctatgtttaaacttactaacctgaaatagataaagaaaaaggag  
gataaattcaatgaattcagaggaagaaatgacctatttttaacgaatcgcagctagagatattgctagtacaaaaagttatgggatttcataactaatagattgag  
cggcagctcgtagaccacctgaaaaagaatatttattttgagctatatactgcccataagaagaccaataggagcaatacttgaattggcaatccataaaaaaacac  
caactaagatccgctaaaacaagcgtatccaaaggaataactaaaaacttaataaaattgatagactgctatagacgggtccaatgctaaataagggaat  
cccctgggatgcaagatattcttttaaaaagtagcttagtccatctgctatagcttgaagcagctccagggggccagcatattcaggaccaatagctgttgtgat  
cgtatcggatatttcttcttaaccacacaattacgagacttctattgtattcccagtaagaggggtcaaaatgggtagaatccatcatcagctcatagacttcttaata  
attcaagttcgaagaagaattgatgcttctacctgtacctgtctattatcattcaacgatcaactctccataatgatattctatactacctaataatgctatgatataca  
gcaattctattttttgactagctgaggaaatgttcaaaataaataaacgggtgacgaattttccatctccaggggaaaaagactatctctaccagataaatt  
cctaattcacttttggggcttccactctgcataaagctctgtttgacaattcaaaatgggtgaaggtttttaccaagaaatcgaattcaaaatcattccattcggaa  
ttctttgttcttaaaagctcggacttcaaaatctcataagggccccaggaatttttctacagcctgttgaataatttgattgattccctcattcaccgattcgtactaa

atagcgtgctaataatccccttcttttgcacffgactttccaatcgaaltgattgtaagactcgtaaagatcaactttacgaagatcccattgtattccagaagctcgtac  
acatggggcccgaagaagcccaattacagcttcttccgcgaataaaaacacccctcaactcgttccaaaaaatgggattctgtgtaataagggtgatattcaa  
taactcctcgtaaaaataatcacagaatcacaacattatcatgccatccataaggcagatcggcagcaactcctccgatgcgaaagtaattatgatcattcgat  
acctgtagcagcttcaaatagatcatataafttctctctctaaaaataaaaaaaggagctcgcaccgagatcgtccataaaaggccaagccataacaag  
tgagaagctafacggctcaattcaacataattaccctaataatagctgctctttgggtatttgaatattcctcaagaattctgggacattaccgttattctctgtaaac  
atagtagctaaataatccaactgttacataaggtaagtattgtataatgctcgggtttccgcgatttttccattcctctgtgtaaatagcctaataatgggtccacaatca  
ataacatctccaccatcgagagtaacgatcagctgaaagaccatgactgattggtgctgaggccatattgactatcatgagatctttctgtgaaagcgttagac  
tcatactcttcttcaattcattatccatgaaaatggattatccatgaattcctcaaacgagggctatcaaaatgcaaaatcaagactactataagactactaataa  
aataagaaaaaattcgaacgatgaaataccgctcccaatattcactgactgattaattctataacgtactctatcttttcccaataagccagcaaacggtg  
acgtttcccaaaagctcggagaccttccgatgaaaaatcttttggtaattcacaatggaagcaagctccgatcttattggtgaaactgaaactgaaattc  
aacagaacccccgtttcttcttcttcaacataaaatcaaaaaatttctacccctcttcttctatgatttttctgatcaggaaaaataaaaaattatgtagtatttt  
gaagttattcactctctacacacaaaaatttgaattatctactactggaattggatttttctatgatgcaaatggattgatacaccgttattgatacttaagcaaatgaa  
acatagcatatgatccattctcggctcagaatttcacgggataagataatggtataagaatggctattaagtaactcaaatgattgtgatacattgatacct  
taacatactgaacaactgccattatctgatacaaccaatagcattcacaagttaaatcttaataatgggtggccaataatgaaatcttctgataatgaa  
cgcttggcctgattcgaattgtccagagttttttagttttcattgcaaaatgatgactcctccgtaactttcaattacgagtacgagaattgaaagacatgaa  
aattcctaattctcagcgcctcaggagatagatagaatatttcaggaacaagaaccagaagaatcttctctattcactaccattccgctcctcactctatta  
gtctgaaaagtatacctgtgaaagatcgtgcaattcagtcacattcagatccggtttttagtccatgataaaccaaatggaggtgactccaccggttagcctaaga  
aagaatagatgcagagggtggataatagatcagatgaaagatcagctgccccataatgaaccaccaggagctcgaatattcctcttccctaataccaagattg  
gagaagaagatctaaagaggaccatggagaatggtcagaaccataatagatcggaccgcaacgaccgaatfaattatctcctacgagaacttagact  
actaagtagaaaaagattgaaaatcatgcatggtctccttttttctttagatgtttctatatgcacaattctcgtatggtctgatgagaattctgacttccatata  
gaaagagatagactataaattgacatctctatgcaataagacaaagggatgataaataatgataggaggtctaggaagtgaatagaatgaaatagagccact  
ctggcttacctatgaaatgagcatggaacggagccactacgaagaatccgggaggtacgaagaagctcggactcatattgctatgggtgagagcggga  
gtgaaacttaggaggtcgaatccccctgttctcagtagctcagtgtgtagagcggctggctgtaactgactggctgtaggtcgaactcacttggggagattga  
ttcattcttaataagaaataaagattgaaataagggtgctttgacccttaggagtaggtaaccgctcgtatctgtttctattgatttactcattcatcattacat  
tctgttctacgattccacttcgacaaaaggaaagagcatacccaagttcaatagctttacgtccgatccgatcatggtttctcactccctagggggaaagtaagg  
cccccccccttggaaagctgtggcgcaggagggttcaacccccgacaccgtggtctgtagccacgtcctaatctctgagctacaggccccccccctc  
actggatctctccgggggtaccccccaaaaggaaacctcctcctcagccatttctcctgggttaagaagatgggaaagcccccttctctataagaacgtg  
cgtccgaggtgtgaaaggggagaggggatgtgatgattgaggtttgaaataagacgaccttgcatttggattggatcttttctatttcaaaaatgtaaaaag  
taaaaatagagggttaagcttttatattctggcatcagctatttgcgagaccctccctacagtatcgcaccgagtagatgaaaccaccaaatcgggat  
ggattggtgtgctcctctacgcctagacaccagaatatcgaaccatgaacgaggaaggcagtagagaatattggctagtaattgtgaagcccccaattcttgac  
tggagggacacaaaggcctctccctctctatctcctaagagatggaaggcagagcttttttgggttttctatctttctcaaaagattgaaacatgaag  
atagatggcaagtgcctgatgattgatcaggtcgtfaggaacaagggtcacaatcgttctgctggttaggatgcctcagctgcatacatcactgcacttccactgac  
acctattaaacggctcgtctcggcctaccttatcttctcacttctctcgtctccatcccgatgggtggaacccgctcgtcctcgtctcggctgtcactccggag  
gctctagggaaagtgaggagagagcactcatctgggggtggttactacttatatgctttcagcagttatectctccgacttggctaccagcgtttaccgtaggc  
acgataactggtacaccagaggtgcgtcctccggctcctcgtactagggaaaggctcctcaatgctctaacgccacaccggatagaccgaactgtctcac  
gacgttctgaacccagctcagctaccgattaatggcgaaacagcccaaccttgaaccactacagctcaggtggcgaagagccgacatcaggtgcca  
ccttccctcgtatggacttggggaagatcagcctgttatccctagagtaactttatccgttgagcagcggcccttccactcggcaccgtcggatcaaa  
cgacttctgtctcgtcagcgggtgagcttctcagtcgaagctcctctccttctcactcagggaccaatgtccgctggcccaggaacactttgacgcctccg  
actgatggctcggccccccggaaaggccctctcctcctccactaagctcgcaggaaggccaaagccaaatccaggggaacagtaaaagcttcatag  
ggctttctgtccagggtcaggttagctcgcacatgtctatttaccgagctctcctcctcagacagtgccccagatcgttaccgctttctgctgggctcggg  
acttaccgacaaagaaattctgactaccttagaccgttatagtacggccggctcaccgggcttcggctcggctcctctcactcagttcaccactcttga  
ccttccggcactgggcaggcctcagccccatacatggtcttacgacttgggagacctgtgttttggtaaacagtccccgggctcgtcactcgcacccccctt  
tgcgagggggcacccttctcccgaagtacgggctatttccgagttccttagagagagttgctcgcgccctagggtattctcactaccacctgtcgggt  
tcgggtacaggtacccttgttgaaggtctcagcttttctgggagatggcatgggttacatactcagcgccttagcgcctggtatgagcctcgtggagaag  
caatggctagtccaggggctcactacagcgtcagcgttggactcggacctcggctcagggcatttctctacccttctaccctgaaaaagcagggtcac  
ctgtgcttaaacctataaacattcttggctaacctagctcctccgtccctcctgaccaacaaggggtagtagcaaatattgacctgttccatcactacc  
ttcggcctgatcttagccctgactaccctcgtggacgaacttgcggagaaaccttgggtttcggggcattggattctcacaatgtttctgactcaagccg  
aactctcgttccgctcgtcgaacccccgttccggttctcctcctaaaggcgaacgtccctaccgatgatttgcacatccacagcttccgagatcgtt  
agccccgttctcagcgcaaggcgtcgtatcagtagctattacgactctttaaagggtggtcgtcttaggcaaacctctgctcttgcacccccacc  
tcttataactgagcggctattagggccttagctggtgattccggctgttccctctcagcagatgaaacttaccctcctcactggccacattgacctcgt  
tattttgggtcatatctagtattcagatttgcctcatttggtagcctcgcgagccccgacccaagaagcttacccttagatgccagtaactgctcggcct  
caacgatttccgggagaaccagctagctctgggtcagtggaattcaccctaaaccacaactcaccgctgattctcaacatcagctggtccgacctctgcta  
gtttcatcaagcttctcgtatggatagatcaccaggctcgggtccataagcagtgacaatcgcctatgaagactcgtttcctcactggcctccgggtgct

cgttccftaaaccaagccactgcctatgagtcgccggctcattctcaacaggcacgggtcagagatcactttcccctcccactgcttgggagctcagcacggtttc  
acgttctatttactaccactgggggtcttttccctcacgggtacttctgctatcggtcaccagagatatttagccttgaagggtgctcttgctgattcac  
acgggattccactgccccatgctactcgggtcagagcgtaaagctagtgatgcttccggtactggactttagccatctagggtgcggactcaaccgcttgccta  
gcagcacacgctgtattgctctcccacaaccccgtttcacggtttagctgctccatttctgctgccgctactacgggaatcgttttcttcttctctgcta  
ctaagatgtttcagttgccaggtgtctcttgcctgctcatggattcagcaggcagttcaaaagggtgacctatttgggaatcctcggatctatgctatttcaactccc  
cgaagcatttctgctcgttactcgccttctctgctctgggtacttaggtatccaccgcaagccttctcttgaacctgccattaacgtaagctatgccatcct  
aagggtctactaaatggaagatctatcaacgtccatgaatgcgaaatcatagatcgaactgccgaattggcaaaatcgggtctatcatagatccgctaagttcac  
gggctggagataagcggactcgaaccgctgacatccgccacagggtaaaccaccgctctcagccctcccggacttaccatagaggccaacgatagac  
aataactccccccgaacacagcttacaactttcatcgtactgtgcttccaagagcaactcttcaaaatctcaaaacaaaagggtgctgagttggaatccattcta  
aggattctgtggtccggggaatccagctacaggagaaccagggaacggggagctctccccttttccgcccacttctgatctaaactaaagaatgctggtttaa  
gaacgagtgattgcccttctccgaccttactgcccaccggagagcggacgctaatgtttccacttattgaacagggtctatggtcggctccgtgacctggac  
gccgaaggcgtccttgggggtatctgtagtctctacgggggtggagataatggggctggctccatgatttcttcttccacatttccctcaaaagggtgaagg  
agatagtgcatcaagctattcgaaggccaacttgatcttcccagggatcccagatgagggaagcctagggagaccgccactccaactatctccatgta  
cgatccatactagatctgaccaactgccatcctactctctactttttgacagccactttttgctcagtagagctttcagtgccatgttccagctcttcccatt  
acttgaanaagtgagccaccgggtcaggtacaagatactaccattaccgctgacaaatagacagccaaccgtaacgcaacgaccaatgcaagagcggga  
gctctaccaactgagctatatacccccgagccaagtgagatgcatgaaagagtcagatgcttcttatttcttcccctggcgcagctggccatctgactgaa  
ccagagacctcggcctggaagtaaatcatcggcctacgatccaaccaatgggagagaatcaatagactctttcgggagcattcctcccgaacgcagc  
taagagacctcctggcccaacctagacacttaagatccttttcaaacctgcttctcctcatttccagtgatcaagagataataatgccacatccattgcaactg  
atcgagggcgtcgtgtagttagggagtcgaagaccaagaagtggtcttattataccaagcattcctcttatggctagatccaacctcctgctccctgcggaaag  
gaaaaagaatttcacgttcttcttcaagggaggatagggaagtcctattgattgctgcttctcagaccgccgggaaagcatgaaaaaagcgtcgaat  
ggtacgatccctccgtcaccagaatgaaagggtgatctcgtagtcttggctgtggaagatcgtttaggtgctccatttccattgaggacgaacctcaacc  
tgtgctcagagatagctctccatacactgataaggatgtagtattctcagagaagagaggaccgtagtccccccggaccgccggatccacagagtga  
atagaagttagatctacatgggactcaccatgaatcggccatctatctctcagggagaagtttggtttcaaacctccgattcaaacaggaggagtagccatg  
ctaattgcttggatgatccacatcttccgggtcagcgtgatgagcacattgaactatccatgtggtcagagccctcagaccgccacacgacgaattat  
caggggcgcgcttaccactgagctaatagcccgtcgcgcggcctcccttggaggcctgctacgcaaaaagcagaaaaactccatcccttcttggacat  
ccccatgccccacaccacacggggggggcaggggacgtcaaaaagggtatctactatcaactaattgttccgactagataataagctcatgagctt  
ggtcttacttccctaaacgaaagaagacttccatccaagtttagctcagacgtatgcttcttgggctgaaagcagtgtaaaccaaaataccataaag  
cataagcattagctcctgaaaaggaggtgatccagccgcacctccagtagcgtacttcttacttactcactccagtcgaagcctagccttagcctatccc  
ctctttaggtaaggtaatgacttcaaacatggccagctcctatagtgtagcggcgggtgtgtacaaggccgggaaagcggatcaccgccctatggctgaccgg  
cgattactagcgaactccttctcagggcgagttgcagcctcaatccgaactgaggacgggttttggagttagctaccctcgcgagatcgcaccttggcc  
cgccattgtagcacgtgtgcgccaggcgataaggggcagatgacttggcctcctctcctcctccggctaacaccggcggtctgttcaagggttcaaaact  
catagtggaactaaacacaggggttgcgctggtgcgagacttaaccaacacttacggcacgagctgacgacagccatgcaccacctgtgtccggttcccg  
agggcaccctcttcaagaggattcgcggcatgcaagccctgtaagggttctcgttgcacgaattaaaccacatgctccaccgctgtgcccggccccgt  
caattctttagtttacttctgcaacgtactccccaggggatacttaacgcgttagctacagcactgcacgggtcagtcgcacagcacctagatccatcgtt  
tacggctaggactactgggtctctaaatcccatttgcctccctagcttctcagtgctcagtgctggcccagcagatgcttccgccgttgggttcttccgatct  
aatgatttaccgctccaccgaaatccctctgccctaccgactccagcttggatgtttccaccgctgtccagggttgagccctgggattgacggcgactt  
gaaaagccactacagacgctttacgccaatatcccgataacgcttcaatctcttaccggcgtcgtgcacagatgtagccgatgcttattcctcagat  
accgtcattgttcttccgagaaaagaagtgacgaccgtggccttccactccacggcattgctccgtagcagcttccgcaatgcccattgcccgaatcccact  
gtgctcctcctagtagcttggcctgtctcagctccagtggtgatcctctcggaccagctactgatcgccttggtaagctattgctcaccactag  
ctaatacagacgcgagcccccttggcggatctcttcttctcctcagcctacggggtattagcaaccgttccagttgttctccctcccaaggcgaggttcta  
cgcgttactcaccgttccactggaaacaccacttccggttgcactgcatgtgtaagcagatccgcaagcgttcatcctgagccaggtcgaactcctatgaga  
ttcatagttgacttactatagcttcttcttctgtagacaagcggattcggaaattgcttcttcccaaggataactgtatccatcgcctcagattatgacctgagttc  
gccaccagcagtatagccaacctaccctatcacgtcaatcccacaagcctcttacccttccgctcgtatgctggcgggggagtaagtcaaaatgaaaaaact  
acattgggttaggataatcaggctcgaactgatgacttccaccagctcaaggtgacactctaccgctgagttatctccctcccctcccctcagaaaagagaatt  
aacgaatcctaaggcaaaaggcggagaaactcaagccaccttctccggccttcttccactattatggatagcaaaataggaaaaatggattcaattg  
tcaaccggctctatcgaanaataggattgactatgattcagccatagcacatgtttcataaaactgtacgatttcccgatcaaatcagcaggttccatgaaga  
agatcttctcagatgttctattcagactgtaggagaagaaccgactcggattcttcaaaaaaggagggaagcagaaccaagtaagatgatagggtcggc  
ccttcttctgcccgaagatcttaccatttccgaaggaactgggtctacttcttcaatccactccagatttctatctgttccacgccctttttgagacctgaaa  
catgaatggcaaatcttctcttaggaacacatacaagaaaaggataatgtagccctccatcaactacttcaatttcaattatgaattcagataatagaatcc  
atgctctaccgagacagaatttgaactgctatccttgcctataagcaagattgacctctgtagaaagactgattcattcggatcagatagaggaccaactac  
gttgcattgccagaatcatttccatatttgaagagggtgacctctgtctctctcatgtacaatccttctctgctgagcccccttctctcgtccacagagaa  
aaaatggaggactgggtccgacagttcatcaggaagaaagaactcacagagccgggagcgaactaataagatagtactactaactaataatataagaat  
agatatctagaatagaacgaactaataatagataatcgaattgaaaagaactgtcttctgtatattccccgttctattgctaccggggcttattgcaatcgat  
cgatcatatagatcccttcaacacaacataggtatcgaagagatcggacgactcaccaaagcacgaaagccagttagaanaatggattcctatttgaagagt  
gcctaaccgcatggataagctacattaaccgtcaatttggatccaatcgggatttcttgggaagttcgggaaagaatggaatggaataatagattcatac

agaggaaaaggttctctattgatgcaaacgctgtacctagaggatagggatagaggagaagggaataatcgaatgaataaataaagaataaagcaaaaaa  
aataagtcgaagatagaagagccagatcccaatgaagaaatggaactcgaaggatcctctgattcgaagaatgaggggcaagggtgataccgag  
aaagatttctctattataagacgtgattgatcccatatgttggtaaaagaacaatctctcttaatacataaatggaagtgtcaatfagaacatgaaacgtgac  
tcaattggtcttagtgatctcgggacggagtggaagaaggcgggagactctcgaacgaggaaaagatccctcgaagaattgaacgaggagccgatgag  
gtgaaaatctcatgtacggtctgtaggggacaggaagggtgacttatctgctgactttccactatcacccaaaaaaaccaactctgcctacgtaaagtggca  
gagtacgattaacctctggattgaaatcactgcttatatacctggtattggccataatfacaagaacattctgtagtattagtaagaaggaggaaagggttaaggattac  
ccggtgtgagatcgcattatcaggagccctagatgctgctgcaagtaagaatgcaaacaggcgttctagtgcgtttagattctatccaagactgtatcat  
ttgatgatccatgtgaatcgtgaacaatgtgaagtgtatggcaaccaataacgaaagtctgtaaggggactggagcaggctaccatgagacaaaagatctt  
ctttcaaaagagattcgattcggaaactcttatatgtccaaggcaaatggaatctttcagggggtttcccttactttgtccgtgcaacaacaattcgaatacctga  
cttttcagaacaggctccagatcaaatagcaatgattcgaagcactcttttccattacacttttccgaaacctaaggacttgatggtatggataggaataacagga  
ttccgatccctagcgggaaaaggagggaacggatactcaattfaagtgtgtaaacgaattccatactcgtatctatagatccctatagaattctgtgaaaagccgt  
atctgatgaaagttgatgtacggctggaggagatcttctctatcttccgatccaccctacaataggggtcaaaaagccaaaaaataagtgttcgttttagc  
ccttataaaaagaaaacggattctgaacctttcagctcatgtcagctcagagtaactcagaaaaagaactgcaaaatccgatcaattttcgtaatcgttagt  
taacatggtggttaaccgtattatgaagacggaaaaaatcattggcttatcaattctctatcagccgtgaaaaagattcaaaaaagacagaaacaatccact  
attggtttacgtcaagcaatcgtagagtaactccaatagggagtaaaaaaacagcgtgtaaaaaagggatcgacgcggaagggtccgattgaaatgagatca  
aacaaggaaagcactgctcattcgttggattatgaagcattccaaaagcgtccgggtcgaatatggcttcaaatgagttccgaaatgtagatgctgcaaaag  
ggggtgggggtgctacagcaaaaagggaagcactcatagaatggcagaggcaaatgagctctgcacatttctgtaaatccatgaacagaatctaggtatgtag  
acacatgaccatacctcgtatcggaaaagaatcaatgaaggagaatcggacgatactttctgaaacaacaaaaaggaagaaagcaaaacagaaat  
catgatcaactaaagccctctcggggcttcttaagaataaagaaagaaactttatgaaatagcattggaataagggtttgacttattcattgggattccgtaaatat  
ccattccaaaaatcgaacaatcgggactttcggagattggatgcagttactaattcatgatctggcatgtacagaatgaaaactcattctcgaattctacgaaatt  
ttatgaaagcgttctattgctctctccagggaaagtttcccaagaatgtatcctaattttggcctaattctctctgatgatcattaaacctgatcaaaaagata  
gacctgttctattctatcttcaacaagtttagtaataagcataacggccctattgtccgatggagagaagaacctataatgactttcggaaaattccaaacgaa  
caattcaacgaaatcttcaatttctatttattatgtcaactttatgtattcctctatccgtagatgacattgaatgtacagaatggctataacagagttctgttattcgt  
ttaacagctactctaggggaatgttttatgtggtgtaacgattfaataactatctttagctccagaatgtttcagtttatgttctactattgtctgataaccaaga  
gagatctacggtctaatgaggtactatgaaatattactatgggtgggcaagctcttctattctggtctatggttctcttggctataggttcatctgggggggat  
cgacttcaagaaatgtgacggtctatcaatacacaatgtataactcccaggaaattcaattgccttatccatcactgtaggactgggtcaagctttccc  
agcccccttcatcaatgactcctgactctcagaaggagtgtggtcgtcacaattctactctatctctgagggtttgggtttgcaaaactccatag  
atatgcagaagagaatgctatcccactccgaccaagacagaaactttacaaaagttattgtatctttgttcaafaacaattaaaggtagagcaggtcagga  
acaacgaaatctttatgataaacagatccatttgcagctcgttattacgggtagttcctacaagaatcggactaatgactatcaatgctgaaattatcagctag  
atgctacatagtggttctcatctcagagactacgagtgaatagagcatccgttgacaaaagatcaccctaagatgatcatctatgcttattgggaacgaat  
caaatcagatggttctatttctcaaccttctgactgtctctacggaaccaaggtcgaaggattgaaaaagtcagtcattcacaaccactgatgaaggattcctcga  
aaagttaaaggattagtagtcttttcgaaatcgttccgaaaagaaatggattcggcttatacatacgcgaggaaggtaatcaaaaagaaagaagacaagttctct  
ttctttatcacttaggagccgtcggagatgaaagtcctatgcacggtttgcatgagagaagaagcaggaatcctctttcactcgtactccccactccagctcgt  
tcttttcttctgttactcgaagggtgcttcaactcagccagcgaattctcgaattccttttatttctcacaacgaatggactcttcttggaaatcctagctat  
tcttagcatgatattggggaatccttctgctattactcaacaagcatgaaacgtatgcttgcatactcgtccataggcaaatcggatagtaattattggaataattgt  
ggagactcaaatgatgatgcaagcatgataactatattctttctatctcctaatctaggaacttttcttctgactgtattattgttctacgtaccggaactgat  
aacattcagattatcagagattatacagaagatcctttttgctctcttttagccctatgtctctatccctaggaaggcctcctcactagcaggttctcggaaa  
acttctatcttctggtgtgattgcaagcagcctatatttctgtttcaatagactccttacgagcgttcttctatctactatataaaaaatgcaagttattatg  
actggacgaaaccaagaataacccttattgtcgaattatagaagatcccctttaaagatcaacaattccatcgaattgagtagtactgtatgtgatagcatctac  
tataccaggaaatcaatgaacccttctgcaattgtcagafacctcttttagctgtaggtctatttctagttcaagatcccttactaactggaataaaagaat  
tagtagatctgtccgccccaaaatgggaatggcgtcaggtaatgaaactataatcaggaatcgaactcattcagattataagttcattccataccggaccagac  
cgtgcacattctattatgagaaggggtcattcagcctatggaaataggaactctgtttacatagaatcccacgtccttactattttaggattaggaataggtg  
aatcagactcgttttgacatatctatcctatcttattgggtaccatagcactcttggccttctattgaatcgaagaattgattgtacattttttgatttgatacatat  
aagggtcctacggataatgcaaatcgaagctatttattgctgactcagcctatagaccgatcgaatcgaataactccaagactccactttgcatatattccatata  
tcacattagatagatcattatcattggaatcagttcactttcaagatcacattagatagatcattcattggaatgattcactttcaagatgcttctgattggtgaaa  
tggtagacacgcgagactcaaaatctcgtcctaagagcgtgagggttcgagctcttcaaggcataatacggagaatcgcattcaatgagcattccccgtaga  
agtattccgaaatctcgcctcgtcctctctatctctgaggtccttaaccacttccctgagaaaaggagacagtaaaagccaaaatagactaaatagcctg  
aacgatcctaaaaatccctcgaaggagataataataaagaacccaagcagacggtatcctactgcaagggtggtcttaagaatccaaaagaggttctcagaa  
gagatagatgatcccaactctattgctctcgtgaaagccttttttacgcgacaggaaaaagtgactacgaaatccccctttttgtcgaatccctgtttgatctt  
gagcgcacgccataagtagcgtacaaaggaatcgtacaacgatcccaataccgtgaaagagaaactcccagatccagggaagcttatcaaaaagggtcga  
caagggttttattctttagcgaaaaagataagatcggatagattcgaaccgaaatgcaaaaggtatcactactatgccagcccaatcattatccacaa  
cttgatttgggtctctcgcgaaaatcgcgagttgcagagatgagaacctgaaaagcaaatcccgaataaagaaacagaaaccgaggaaaccacaagagtg  
agactagtagagctcgtctttgtacttcttctccttttactcaatgattcattcgaatttcccacaaaattctatgcttattcatagggcctcgttctaatgtc  
tacaagatctagtgactggaactcgtggttatgaccgaaatcctttagatggaacattgtcttttcaagtaaaaacccccagatataaagaatgaaaaggtgc  
ttcgttctttctgtgaaataaagccctcgtaccttaatgaaaggaaaataggaattttcattaggtatttgacaaataggatcgtccagttcctatagaacctatc  
actaaaataccgataggcctaagcggaaacgaaaagatttccctgagatggtaaatgaaaacgattagccccatcaggtttgggaataatgtaggcaag

gaatatacgtcttctgctaaagaggatctatfaaactcataaactcattagatccttgtatcaatgtaactaggatcataagtaaacggatcccgggtgtcaatcctttg  
ataaccaaggtcattcttctgctaaagagaatgatcactatgagtcagactcaatagaatggatccattccaaatagcgagaataggattctggatccctctcaatct  
ctcttcaattcaggatccagagagggttttcatagtcactccgaataatggccatccgaatatttctgattcattttctatgatatgctttctatataaaaattggta  
ttacgatgtacgatgatccctgttaagcatccatggctgaatggttaaaagcggcaactcataaattgtaaaattgctgggtcaattcctgctggatgcacgcgaacc  
ggaacgttccataagctattggaactggctctatccatggaatctcatccatccatacacaagaattggtatggtatattcatacacaataagaacaataa  
gaactgaattctatc gatactggaactcagagcatagagggaaagtcgatttatggatggaatcaaatcgcagtatttacgaaaaaagcttctgtttattggga  
aagaatcaatatactttatgtcgaatcgggattcactaagacagaataaaagcattgggtcgaactcttcttgggtgtaaggtatgagctgtgaatgccatcgact  
acccggaaagggtagaagaatgggccctattctagacatacaatgcattacagacgatgatcattaccctcaaccgggttattctattccacttctagatagagaa  
aaaaactaaaggagaacttaataatacggcgaaacatttatacaaacacctatcccgagcacacgaagggaacctagataggcaagtgaatccaatcca  
cgaataattgtatccatggacggcaccgttgggttaaaggtcgaatccagaggaaatcattaccgcaaggcatagagggggaggtcataagcgcctataaccgta  
aaatcatttctgacggaaatcaaaaagacatactgtgtagaactgtaacatagaaatcagaccctaatgaaatgcgtacatttctctacactatggggatggtga  
gaaggatattttatccagaggggctataattggagatactattgttctgtacaaaagtccatataatgggaaatgcctcattttagtgcggttgaac  
tattgattacgtaattggaagtaaccaatagggttacgacgaacctagaaatcagactgatcaattgactacctacgggatagacctcaacagaaaactgt  
tgagtaacggcagcaagtattgattcagtagtctctatagaaaattattgacttagagatattgtaaatggagaagacaaaattgttgaagcagcagacagaa  
ccggaaagcggccttgttcaagagagaggagcgggttattcatttaattgatggtcagaggcgaattgaaagcgaagcagtggaatgaagacccccgggg  
gaaaatagggtatgctctacgttaccataatattgtagaagatcagcgaatctcatagatcattcgaatgctacatgaagaacataagccagatgcgga  
acgctgtagacatgtagaagatcataatcagcgaatcggcagatttggattccttctatataccactcatggtgactctcatcagattcataaagatc  
atctgtctagatgctcatalatcagaaagcgtatgcttggaaagcgttgcagatttgggaagggttttggagaaaagaagaatcattcaccgg  
atatgcccattagcagcggccatacacaatacagaatcacacgtggaagggtgggcaattagctagagcagcaggtgctgtagcgaactgattgcaaaagaa  
ggtaaatcggccactttaaagattaccatctggggaggtccgttggatcccaaaactgcttaagcaacagtcggacaagtgggtaattgtgggtgaaccaaaaaag  
ttgggtagagccgggtctaaagtgttggctaggttaaagcggccgtagtaagagggtgattatgaaccctgtggaccacccccatggggcgggtgaagggaaag  
ccccattggtagaaaaaacccacaacccttgggttattctgccttggaaagaagaactaggaaaagaaaaatatagtatgattttctctgctgccgta  
agtaaatcgaactaggaaatggaatgtcatttttgaattgcaataatgggatggcgaacgacgggaattgaaccgcgcatggtgattcacaatccact  
gcctgattccacttggctacatccggcccttaccagctaaaggatttctcttttccattcattatttatttctgacctccatactctgacgagatattggacat  
cgaatccactctttaaattgaaaaaaaggagtaatcagctgtgacagaaaaaaacgaatcctttttagctcatcatttattggcaaaaatagaaaaggtcaata  
tgaaggaggagaagaacaatagtaacgtggtcccggcatctagcattctaccgcaatggtggccatacaatgcgattcataatgaaaaggaacatatacc  
tattacataacaatcctatgtaggtcgaatgggggaattcgtaccaactggcatttcacgattatgaaagtgaagaaagataactaatctgctgtaaa  
ctgaattcagaatagaaagattcaaaataaaaaaaagaata

>O.nivara\_IRGC88812\_cp

cccaatatctgtctcagcaagatattgggtatttctagcttcttcttcaaaaattgctatattgtagcaaaaagccttatccattaaagagatggaactcaagagcag  
ctaggctagagggaaattgtgagcattcgttctgctcattactccatcaaacgattagcagcgttggatgatacagcccaagttaataaacgcgacttggctatca  
actacagattgggtgaaattgaatccgtttagattgaaagccatagtagtaatacctaaagcagtgaaacaaatccctactacagcccaagcagccaagaagaagt  
taaagAACgagagttgtaaaactagcatattggaagattaatcgccaaaataacctagagcggccacaatattataagctcttctcttaccacaaatctgtaacct  
cattagcagattcgttccagtgttccctgatcaactagaggttaccaggaaacctgcatagcactgaatagggaaccggcgaatacaccagctcacacctaac  
atgtgaaatggatgcataaggatgttctgctcgtggaatacaatcataaagttgaaagtaccagatattcctaaaaggcataccatcagagaaactccttgaccaa  
tagggtaaatcaagaaaacgagtagcagctgcaacagggagctgaatagcaacagcaatccaaggacgcataccagacggaaactcagttcccactcagca  
cccatatacaagctacaccaagtaagaagtgtagaacaattagctcataaggaccacattgtataaccactcatcaacagatgcagcttcccaattgggtaaaa  
gtgcaatccgatcccgcagaagtaggaataatggcaccagagataattgttccgtaaaagtaaaagcaaacagagctcacgaatacctcaatctactg  
gagggcagcagatgaagcgcataataacagaagttgcggcgaataaggtaggatcatcaaacaccgaaacctccgatgaaagacggtttcgggtgtag  
ttaccaggtgcagaagcgaacccacaggcttcttctcgtctcttaaaattgcagctatgtaagatcttgggttattcaaatgcaaggactccaagcagcag  
tattaactagaaagataatgaagcctgttatttaacagtataatagactatataccaattgcaaccaagccagccccgacagttgatatccatacaaaaaattta  
ccaaacaaaaaatttgaatgaaagtgaagtaaaaaactcaaaactcagattgctccttctagtttccataggggttgcggcgaacccggaactgctggat  
ggagtagaataattcttctgtacaatagagaaaaaaccttccccaaatcgtccttgcattttcattgcacacgacttccctatgtagaaataggctatttctattccg  
aagaggagagctactaatttttagtagtaagtgattcacttactatttatagtacagagaacattcagaatggaactgtgaaagtttaccctgatcattatcaat  
catttctagttattgttttgaatgattaatgaaggattcaccagatcattgatacggagaataatccaaatcaaatcactcactgctgcatccacggaagaa  
aagtaagttgtttggcgaacatcaaaagaaaaactgctcttctccgtaaaaaattcttcaaaaaataccgaaccaaccattgcataaaaagctcgtaccgtgtttat  
gtttacgagctaaagtctagcgcgatgaaagtcgaagtataactttagtcgatacaaaagcttcttttgaagatccactgtgataatgaaaaagatttctacatccg  
accaaaccgatcaagaatacccaatccgataaatcggcgaatgtgttactaataggatgccccgatccagtaaaaattggccttttgctaaagatcaatgaga  
ggagtaacagggttggatcgaattttcatttgatctattagaatgaatctccagcatttgattcctactaacaagaatttattgtacttgaaggtac  
cccagaaaatcgaagcaagatttctaatgttttagatgatccttgcggtgagtcgcaaaaagagaagaatattccacaacggacaaggtaacattccatt  
tcttctcaaaaagagattccttttagatcagaatgtccttctctgatacgaacataatgcataaggggatcacaacgaacatattggtttccgaaaaaaagcag  
ggtacattaacccaaatgtccatctctagaaaagatgattcgtccagaaggtcggaaaggttaatcgaagcaagaagattgtttacgaagaacaaca  
agaaaaatcatttctgatacataagattataggaaccgaaatagcttttttttcaaaaataaaaatgatttcttgaagtataaaaactattccaattcga  
gtagtagtgagaagaatcgaataaatgcaaggatggaacatcttggatccggtattgaaaggattgaaagcaagatccaaatggatagggatggttattctat  
atgtgctagataatgtaagtcaaaaatttcttcaaaaaggaatattgaaatgaaatagatcgaatcttgaacttgggtatttcttctccgacaaagactgtt  
ctgtagcgaagatttctacaacgatcgaacccctcagatagaatctgagaataaaactcagaataaaaaaattgtgtaatccaataatcagcttggta

ggatgattaaccaaataatcAAAAAattctgctgatacattcgaatcattaaccgtttcacaagtagtgaactaaattctgttattagaaccaataaattcgacaagttc  
ggaaccatttaaccataatcatgggcaaacacataaatgtactcctgaaagagtagtgggtagacgaaatattgtctaggaaatfaagttttctgaataaccctcga  
atftttccattgtatttctacttgaatcagagagagaaatattctcggfatacaaatggtgatacatagtaacaatggtcagaacagggtgtgcatfttttaataca  
accctggggaagaaaggagctaatccaggatctttccgctctttctatccaaattgtttatgtttgttctaattacaaaagagaacaatcctttatftttgcagg  
ccaattgctctttgactttgggatacagctctttatcaataactgctctttacacattcaatccataacatcctttcaatccaaaatcaagaataaaggattcctaaa  
aaaaaaagaaaaatcaaggctactcataggaaccagctttccctacatcagcactaatctattttaacgtctaattagatcaggaggtctccaattaagaa  
gtaagctcgttctttgtttaccagaattggagccaggctctatccatttattcattagaccagaaaatcagaattttttattccattccaaaatccaaaataagaa  
attgattttatcagatgctatttttccattcattacccttgagatcagtcgctgcttatagactctaccaagagctggacgaatttttcttaccatccaaaatgta  
aagatcatagctgcacttaaaagccgagtagtactctaccattgagtttagcaaccagataaactaggatcttagatcagatcgaatccaaaatcaatggaattacacc  
gcacaccctgtcaaaatctaaaatagcaagacattaaaagaagattttatcaccattgaaaacactcagatccaaaaggaggggtctggttaaaattcactaag  
gttaaaagtggcaccaatcacgacgtcaaaatgtcattttttgacattttatftaaaaaataaataatctgtatgagagtacaacaagagggacaaccctacat  
ttgagcaaaagtgtaggcaaaaactaataggaggtgagataaagagacttatccatctacaaatttagatgtcaatggacctttgcaatggaatacaatgta  
agaaaaaafatagatagaaaaactcaaaaaataaaggcttatgttggattggcacgacataaatccagtaaaaaataggatfaagaaaggcaaatatftctaaa  
tagttagacaacaagggatactagtgagcctctcctagtttttattcatttagttctcaattaactcaaaagttctttttttaaagaattccgctctctaaaatca  
gaaactgttctgtgaggtgagcaccftttcaaggaaatagagaatgctggacattfaacaagtttgattctttatcggatcaaaaaactactttcgaagatctc  
tctctctcagatcgaacatcaattgcaacgattcagatagacgcttattggatagatgtagataaacaagccccctagaacgtataggaggtttctctc  
atagcctcagagaatgacttgcattaatctccgtacgaaaaaacaatttcatttatactatgactcaagttgactaattttgattgacagactgaaagaaaaaat  
cctttgaaatttttgagctgctctaaactctttcttgcctcatctgaacaaatcacttttattccttattccgggtccaaftctattgttgaggtgagacagttgaaatc  
gtgttactgttcgggaatcctttatctttgatttggaaatccttgggttaaacattactcgggaatcttattctttttcttcaaaagagtagcaacatacccttttct  
attcctcagataaagcatttccctctctatagaatcgaatagagcgattgattctgtagacttttaatacaaaagagtttccatcttccaaaatggactttctct  
atftaaccttttgattctatattttcatttctatattagggttagaatgacaagtggcctaatttattgatttcaactaccctgattcttccctgataaaaaataat  
tctgtcctcagagctccatcgtgactatttacttagcttactacaacaaccagcgaaaatcggctgggacgaatagaacagactatgtagcgaagagcat  
ttcattactatggaaaatggtgatagcaaaatccacaatcagatcgtgcttcaagtcgacgttcttaccacatcgtttaaacgaagtttaacataacattcct  
ctaattcattgcaaaagtgtataggaattgatccaataggatggaatcatgaatagtcattagttcgtttttgtactaattcaaaactgcttctctatgagaa  
atatgaataaaaataaafatgattatcgggaagactccgcaaaagccaatttattaaaccatattctatcatatgaatgaatatagttcgaaaaagggaata  
aacaagttgcttaagacttattatggaattccatcctcaacagaggactcgagatgataatccaatcctgaaatgataagagaagaattgactcttccaaca  
aataaactcaacctccgttaaftaatttaataatattagattagcaatctttttcatacattttccgtaacaaaactaattaactattaactagtaaaactatgc  
aatgaaaagaaagttttgtagtataagaattctgtattctcagactcgaataccaaaagaaagaaaaaatgaagtaaaaaaacgattcctgtaaagtfaaat  
taaggctttgctttactattttttctttacataaagaacactccaaatcaaaatgaaatccattctatcaacgagcagttctatctattaccgggatgagatc  
ctgataatftaaaaaacgagatcagatcgtttcgttaaccaaaagaaagaaaaagaaaggaaccttttactaataaaatactataaaaaaattatctctat  
cataaatctatctaccataaaggaataggtctcgtttttatacaatgtttctacgtaagtttaaaatttttcatgaaaaaagatttcaattgactggactgacactg  
gattatgtttctgagacgaaaatgaacgcattagactgcatcgaatcaagagttataagagaaaaaattctcttaataaactttatgctcgtcgcagaatacaat  
acgattcattcttcttcatataaaaaatctgggacggaaggaatcgaacctccagtagaacgggacaaaaccgctgcttaccactgcccacgccccattc  
gggtttatgagacactaataaacagtattatgtttattcttattcgtcaatcctactcaattacataaaaaatgggggtattctctgtaggattctagacatgcgaata  
atatagaatccaaaaatgattgatcattacatggaattctatagaatataatgaaagtcgaatttctccactcattgagagtgcgaatacaaggaggtattttg  
gtttgggaaagtcggaagaaaaaggatttgaatcctctttctttcccttagaaaaataactcaatcaaaatcaattatctactctacaagaacgaaacgcttg  
ttatgcctaatacttagttaacctgatttgtttattctgttattatccgactagttttctcggcaaatgcccgaagcttagccattttcaaccaatcgtgatttt  
atgctgtacactgactctttttctattagctttgtttggcaagctgctgtaagtttcgatgaaatcttactactctgctgccaattgaaatcatgattcattctaaa  
aaaatcgaaaaatgataagagccgagaagcttataatgaacctcagttctaaaatcaaaftctctacattgaaatgatagtcgcagaataaattggatcagc  
ctttactccctgcatctagctgagcaggtatctttaggaaccgacaatacctaacctaatttattgataagagtgcttattataaatcaattctgcaattttttcaaa  
aattgattttgcaatttttaggtgtcaaaataaacaaaaccatcctagtggaattgtgtgtaaggaaaaacgggtaacttattccttaaaaaaaatctggagattatgt  
aatgcttactcctcaaaactttttatcacagtagtgatattcttttccctcttattctttgattcttacttaatgatccaggacgtaatcctgggcgtgacgagtaaaaaat  
ccaaaatftttctcaaaatggattgttctacatttactacgagaaaatccggggtcagaatcctccaattcgaaggtcccaaacgatccgaggggcccga  
aagagagggtcgaacctcggtaaaaaaattgtacaacggattgcaaatccgctttagtccactcagccatctctcccgtccaatcgaaggtttcc  
gtgatagacagaggcaagaataacgattgcaaaaaatcctctttttcttcaaaagtcaaaaaaattatattgcaattccattttatattctttttctaatgta  
ataaaaaaaagaaatctctttttcttcaattcaaaatggatattggtcaaaagacaatcagatagattttcttctcagcagcatttccatagactgtta  
taataaaacaagcaggttatagaaaaaactcttttttatttatacaaaaagcaaaaagggtcttatcaaccaaccacccataaaatggaaagaaagata  
aagtaagtgacctgactcctggaatgagcctctatccgctattctgataataaattcagtagatgaaattgtataagtgattttttgtatttcttagacttagacc  
acgcaaggcaagaattctcgtatttactatttataattctgttactagatgtctatagaataaagaagaatcgaaccctttccgctacataaaaaatggattc  
gaaagtcaattttttcaatcttacttttttcccttaaaaaataggctttcttggaaataggaaatcaggaataatcctgaaftccaatgtttattctatagat  
aagaaaaactaattgaaatcaattcagatttaccacgactcggctgtgaccatagataaaaaatgcaaafttctatctcagaccattgaaaaaggcattga  
acgagaaaaaacgtccacagataatctatgctgcttggaaagtataaaggtgctcggaaatggttgaagtaattgaaatagaggatcactatgactatagccc  
ttgtagagftactaaaagaaagaaatgattttttagatatttaggacactgtttacgaaggaccgtttgttttttagagatggtctggcctattgcttttctgtgctta  
ttcgttttaggaggtgttttacaggacaactttgtaacttctggtataccatggaattggcgagttcctatttggaaaggtgcaatttcaaccgagcagttcca  
ccctgcaaatgatttagcactctttgttactatggggcccggaaagcaaggggatttactcgttgggtcaatttaggtgctgtggactttgtgctctcc  
atggggctttgactaataaggttcatgttacgtaattgaaactgctcggctgttcaattgcggccttataatgcaatttctctgcccacatcgtgttttgttcc



gtattcctgatttatccactggggcaatccgggtggtctttgcgccgagtttggcgtagcagcgatatttcgattcatcctcttctccaaggattcataaattggacgtt  
gaaccatttcatatgatgggagttgccggagtttagggcgcggctctgctatgctgctattcatggggcaaccgtgaaaacactctatttgaggacgggtgatggtg  
caataacctccgcgcttfaaccaactcaagctgaagaaacttattcaatggcaccgtaacgcttttggcccaaatcttgggttctttccaataaacgttgg  
ttacatttcttattgctattgtaccggcaccggttatggatgagtgctattggcgtagtcggcctgctcgaacctacgtgctatgactcgtttccagaaatcc  
gtgcagcggaaagactctgaatttgagacttttacacaaaaatattctttaaacgagggatfctgctgctggatggcagctcaggatcagcctcatgaaatcttata  
ttccctgaggggttctaccacgtgaaaacgctcttaaatggaactttgttttagctgctcgtgaccaagaaaccaccggtttgccttggggccgggaatgccaga  
citatcaattgtcgggtaaaactacttgagctcacgtagccatgcaggattaatcgtattctggccggagcaatgaacctatfagaagtggccatttctgacttctatct  
aaaaaccatgatgaacaagggttatttactccgacttagctactcttaggttggggagtagggcccgggggagaaagtctagatactttccgacttctgactt  
ggagtacttcatctaatttctccgcagcttaggcttcgggtgacattatcacgccttctgggaccggagacttgaagaatctttccatttcttggttatgtgtggaa  
agatagaataaaaaactactacaatttgggtattcactaatttggtagtataaggtgctttcttctagactcaaacgcttttatttggcgggtatataatgatacctgggct  
cctggggggagagatgtaagaaaaattaccaatttacccttagccccgggtgtatatttgggtatttactaaaatccccctttgggggagaggggttggattgtatgtg  
gatgatttagaagataaattgggggacatgatggttgggttctatttgggtatttggcgaatttggcatalcttaaccaaaccttccgcatgggctcggcgtcattt  
tatgcttggagaagcttactgtctatagtttagcgtttatctgtcttggttttatcgttggtttctggttcaataafacagcttaccgagtgattttaggac  
ctactggccagaaagcttctcaagctcaagcatttacttttagtagatcagcgtcttggagctaatgtgggactgcccaggaccacaggtttaggtaaaata  
tctaatgcttccccaacgggagaggttatttggaggggaaactatgcttttggaccttctgctcatggttagaaccttaaggggcccaacgggttggac  
ttgagtgggtgaaaaagacatacaaccttggcaagaacgacgtcggcagaatataatgacctatgctctttaggctcttaaactctgtgggtggtcgtactacc  
agatcaatgcagtttaattatgttctcctagaagtggtagcgacttcccatttcttaggattcttcttttggccatttggcagatgcaggaagagcccgggct  
gctgcagcaggttgaaggggaatcgtatgattggagcctgttcttcatgaccttaactaaagatttcttattatactgttctactgttcttttctgttctg  
ctcggttattctatagccgagccattccttctatgaaagaaagataaggggacagacaacaaaaaacaataaaagaacaaactatfcaatcagcaaaag  
aaaagagagagaaagcaaaaggagagagggattcgaacctcagatgttctagaactataccggtttcaagaccggagctatcaaccactcagccatctc  
tccacagcctaactcttatttattctcaaaatagaacatagccatcgaactgactactaacctctagaacatctcaaatcaaatccccctttcagatatttctgata  
ctgtatccatgtatacagatccgctatataccgcttgaataaagcataaaaccccccaacccatatacaataaaaaaagtgtgagtaataagtttaagag  
aagaatcaatggattcatgataaacctcctacttcttatttattacaatttggattaagtggggatcaataatataatgtagtcaacttattttagtgaacttggg  
ggattagaatataactattgctttccaattagctgttttgcattaaatgtgacttctcagcttagtcaacttattttagtcaacttattttagtgaacttggg  
aataaaaacgttatttccgggtacatcatatggattggactggttcttctgtagctatttcaaatctctatttcttaaatgtgtttagtatttagtcccagatacaaaa  
taaaaaaggccgttattcggattgtgagacgattaaaatgcaatttgcgcccgaaatgattgacagacaataaataaaaaaagaaactcaatagaaaatg  
aaacggctgaccagacatagacgctgacccagcggatataatatacctataaataatagacgtagcagcgtatgtaaacatctccttcccaa  
ggagaagatacgggtcgttcccggcctcgcagcttaatttagtaaggtactatgataaaaaattagctacttttataaagtaaatggtgtagtctagtagtaccgta  
cccccttactatcttagcccccttgcacccactcaaaaaagagcactacagcggcgggaatcgaactggcaacaggggttccctaaaccgggattaccgaa  
acaaacaccagcaaacagctttaaagggaaggagatagactgtccttcttctatttatttttcttcttctcaagtagggggccttgagagtctcttctgtgtag  
caagtactcgaacctgctcaatttggccttatagggtcgggaactaatgaataaaaagggttggataccgccaaccaccagcccttaccatatactagacaaa  
tagaatagctcttatacagactcctaagtgcggagacgggaatcgaacctgacctaagggttatgagcctcgtgagctaccaaacctgcttactccgctcgtgga  
gcgctggaaccgggtgacgaaaaaggttgaatacagccctaccatgtctagacaaatagaatgattttatatacagaatggagcgggtagcgggaatcgaac  
ccgcatcgttagcttggaaaggctagggggtatagtcgacgttgggtgattattataacgctcctaattcaaaaccgaacatgaaattttagtccatcgtcctttagg  
gtatttccaccacttaacatctaaagcagctttttgtctgaatggaaccaaggctcctgcttctagatgatccctaaagagtaggagatagaatttgcctaaatctatc  
taactaattactcgtccctaatttcaatgaagatcctgaggaagaatgggttccaccgagctgaaacaatagctgatggttctagtaaaccaaaactaccg  
tttttagctattgcttccatttcttttaacaaaagaaatttagttagctgattggaataaattttttagtcttcatccatagatcccttactcataatttaaaatggaa  
ccttaatccaatgcaaaatagctcgcgactctgtactcataatcaaatctatttgggtttagcatttcaatagcttgggtacaatcgcgaaaatgcatatt  
cttctcaatagctattgagagaaaaaggagtaaatcttcttaagaactaaagtttctcaggaataaaaaacctaagagacgcttaagtatatcttcaaatca  
gttattaatagaacgaatcacatttaccactaaactataaccgctacatgtaaatctgataccaacgctacccttgcagggtagccatcgaagaaatgactaat  
tcccttagttaaatacaagagaaggttctcagctagcgggtgtagctcgtcgcggcccttcttacttttcttcttctcagaaatgaaacaaatgaaatg  
aagaaaacatctccccactatcaaatctggccatagagaagagtagatgttttttttattatcatagacttccctatgcttggagaaacaaataataa  
cttaaaagaaaaaggacataggagccgaaggatttactttagttaaagaagattcgaatgtctcgtctgattctctccgtttaaacttttcttcttcttccact  
caattctagttattagatttctttaaagaatcaaaagaatgaatagaactaaagaacacacaaaaaagagcatataggccgagaccattcaaaaagtcttcc  
caataatcatattgggtatctgttcccccttcttcttatttaggtgggcatgttggatttccatataccatcgaacctaaagggttccagaacctccttttgc  
tagtttccgaaacggaaacacctgaaccaggagcagataaatttactgcccgcctttacaagaaaattggtataaaactccactacagtttgtcaaaatgcac  
caatcagaatcccttgaatattcaagtaccctatttctaaatatttctaaagagaagggtacctgctgaaaatcgttcaacaatccgcttaagaaaaattgcaaa  
gtttgaaactcgaaggtttccaagggtgctgttaaaattgttcaacctcaccacaaacagacaagaatatactactgaaaatataaccagccatagggg  
atatgaaggcgcgaatcgtttataccccaccaattagaggaaataaaacataaaggagaagtttcatgataagatcagcaatagaagaaaaatgccc  
attttcagaccgttctgagatgtgaaaagcctaagataaaaaacctaacttctgcaagtataagagagaatagaagatttctattttctgatt  
ttctaaagatttttgaacctgaccatgaatagacttatatactcgtatatacagatataatgtacattatggagtagacctataatgggaaatgaaagtggctaatf  
gaattgaataaagaccctttaaactcagtgtagagtaatgccatggaagcataagtcacgggtcaaatccgataaaggccttttttacttagtggtagagta  
gcccggtgaagcgtgagtcaggttcaaatccgatacagcttcttactaaatcacttcttcttcttcttcttcttcttcttcttcttcttcttcttcttct  
gagatgcatcatttttagtttaaacactaaagcgaagcagggggtgtaaatccaaaaaagaaatgtacttcttcttcttcttcttcttcttcttcttcttct  
aactaatatagaaccttttataatctatttattccatctcttataaacgaatttcccaaaaagtaggggatgacccgtgaattaacccaactcaactaaaaaa  
atcctcaaaaagcataatggaaaagtaggaaggactccttcttggatctagttatactctcagatattgacaattcaaaaaactgctcactatcattatagat

aatgaggagcgggtgtataccgccctatcgtctagtgatgccctatcgtctagtggtcaggacatctcttcaaggaggcagcggggattcgaactccctggg  
ggtaggagatfataaaggaggtfaatcatagattatcaaaaacctagaataaattctctgggctgatcccggcgggtaatggggacggactgtaaatcg  
ttgacaatatgtctacgctggtcaaatccagctcggcccaaaaatctagggtctctggaatagtgtaaatccattttttctccataaaaaagaatattgatccata  
gaaataaaaagaataaaaggataaaaagaaggggaaatatcttctaatactatactctttcattcctctctacaacaaaaaaagacctttctattggtattgaaa  
ggtgattatctatttttagcgataataatcgacatactagttatgctattctcactataccccatacgatacgggggtatgtagtatgattcgtctattcttag  
agtaggacagcgaatattcttattcttaggtccatttaagaataagatgccatataagaataagatgccatagccccggggattgtagttcaattggtcaga  
gcaccgcctgtcaaggcggagctcggggtcgggccccgacgtccgaactagggtcaatgaatggagaattcattctttccattttccatgaaaaagggg  
ggcagaaagcaagatcaaatcctatgggggtacccctattcacttttttagttcgcgttctcagtaaaagagggagataggaattttttactactctctggtg  
atagcgaagacatacatatcagtggaagggtatctctatgttactattccactctcaacctgaattgattgatagatccgatattcataatgaattgattc  
agtattatcagaatgcaagctctccctgaaattacaggataccctttccctctccatgggattacatcccgaattattgcgaaaaaaagggttatggaagcaata  
ttctgcatttattgctactgattgcttctactgctttttacttattattatgtaaaaacgtcagccaaaatgataattggaagtcaatcaatcattgaag  
aatgaaaaagggtatataaaataaaaatccaagtcttaaatgaaaggatccgggtggaatcataaagtgtgtagaaaaactacatagtttttaccacact  
ttagagctttctattatattcttgaatctacatagaatagattactagattgaaatagtagtctaattctttttcactgcatccacttaattcaatcaagtcaaaat  
gaaaaatccatggaggagagaaaaataatgagaatagactatagtaaaagaaaaagtaaaaggaaaaaccagcgaatcttcatgcttaaacatgctcgc  
gaaatgttcaaaaagacataaaatatttttaagaactaagaataaaaaagagatataaaacaaatggaatgtgcgatgtgggaatgctccgcggaagaaa  
atctaaagttctatgatagaacttttttaaccatgggtcgttctagtagcgattatgaattgctcaccgctctttctattttctattctttctattctatagtaga  
atagaatagaaaagaatagaagactcttttacaagagttctacaggagtgaaacaaaatfaagaagagagaaaagaataaaggtcggcaaaatgattaatg  
caaacggctcaattaaagaaaagagttgatacaaacatcactactatccatgtaaatattgctcctattctatgaaagaaatattctactattgataaatac  
gtaaaagactaccatfaaacagcccaagcgaactactatccatgtaaatattgctcctattctatgaaagaaatattctactattgataaatacagtagaatc  
aagggtacagagtcaaaaagggtctgacctaaaactatggatgaatcagttcaaaagaaatfcttcaacaaatcttagagatttctgtagaatttaacaatctt  
agagtatttctgtagaattggggagcattaaagataaataatgatacagcccttcttataataaaagaataaggaaacgctatctcatccctattgtagcgttgg  
gccactactgtaaaaacaaccaccagttgaggaagaacgggtggtctcaaatccagatcgcggagccttgtattctctgccccactatgctgggtgcaa  
attgtcgattgtagcagactataagccctaaagtatttattgatcaggcggcaccagattgaaactgggataaaggattgtagtccctgcttaccgcttggcca  
tggcccaaaaaatacagatcaaaatcgagaaaagcaagattcaccagtttctactaaaactaacttcttttcttfaactaattctactactttttccaatctt  
ttcaaaaaatctattcatgctttttggatccagttctgatttctcctcaaaaggattctatctfaaacacacattgtaacactagaaaaactccctttcttctattgaa  
atgaaaaggagaaaagtggattctagtcacaagctacaaaatgaacaatggaaacctaactagaattctttttatttgaattcgggtattctctccgcct  
gccattatggcataaaaagacaatggattatgcctaaccgtatataagtaaacccaggctccgaacagcattattatctatgtagtccctttagtatactct  
gtggagaatcgtcttatttttctgcaatataatcttgaataaaaaaaagaaatgactttgctatgtggaggtccagaactagattggcatgactfaaaaaagta  
cttacttttttaggattctacaacgaaatcttatacttattttatagaaatctactactacgaacaaaaaaagaaactcaaatctttttgaaatfaaacgaagcgtg  
ctattctcaatcgaactaaaatcaactttctagtgcttataaattattattttgtttatccattcatagaaaggagaaaaaatgagaatcttggcgtccaatctaa  
gaatatcataaactgaaatggcagaatttttcggaggtctaggaatgtttatcacttcttcttcttcttcttcttcttcttcttcttcttcttcttcttctt  
ctattcatatgtagaaatcatatagaaatagtagtggaaggtccgagaatctcatgtagttatgtaaacagaaatagattccataattgtagatcgtctgtaggg  
attgatgaagagtagctgataatggaatttttctgataaacaggaaactaagattaagatgctccggaatgaaatgagggaatgcccacaataccggatttag  
tcagatccaatcgaaggattttgtaggtcattaatcaagcgttggcagaagaactgagaagttccaacaatfaagatccagatcacgaaatcttctcaattatt  
gcgaaaggatcaattgtagaacctcgaataaaagaaaggatgctgtgtagaatcactacattcttccgaattatagatccgcgcaatattttgttct  
gatgtgcaaaagcaaacatttctattggaacattctataatgaattccttaggaaccttataaataatggaatataccgaattgtagaatcaatattgtaagtc  
ctggtattactaccgctcgaattagaccataaaggaaattctatctaccggactataatcagattggggaggaagatcgaattagcaattgataaaaaaga  
aaggatagggctcgtgtagtagaaaacaaaagatactattctagttctatcagctatgggtcaaatcaaaaagaattctagataatgttctaccctgaaat  
ttctgtctttccctaatgctaaggagaagaaggattgagtcaaaagaaaagctattttggagtttatcaacaatttctgtgtaggtggggacctggtatttctg  
gaaatctatgtgaggaattacaaaagaatttttcaacaaaaatgtgaattaggaaggattgtcgaacgaaatgaatcgaagactgaatctgatatacctcagaa  
cagcacctctgttaccgagatgattggccgtacggatcattgattgaaatgaaatfgaaacgggtatattgacgatgacgatgaatcattgaaaaata  
aacgtattcgtcgggtcggatctgtacaagatcaatcggactgctctgtgctgtttacacacatgcggttcaaaaactatccgtagagatttaccatacgaatcaa  
aacgactccaaaactttgtaactccaactcaacctcgatttttaataaactactacagaccttcttggtagacatcccttctcaagttttgatcaaaccaatc  
cattgacacaaacgggtcagggcgaaggtgattgttgggtctcggagattgacggggagaactgcaagttttggagccgagatccatccgagtcactat  
ggcggtatttccaaatgacacgtccgaaggaaatcaacgttgacttactgtagcttttagctattcatgcgagaattgacattggtgggatccgtagagagtcatt  
ttatgaaatctgagaagcaaaagaaaaaaagagagacaggtggtttattatcacaataagatgagtagtattatgtagcagcaggaattctttgtcctg  
aatcggggattcaggaagaacaggtgttccagctagataccgcaagaattcctgactattgcatgggaacagattcatgttagaagattttcttccaatatttt  
ctattgggggtctctcattcttttattgagcataatgatcgaaatcagctttaatgattctaatatgcagcggcaagcagttccgttctcgggtccgagaagtgcat  
gttggaaactgattggaacgcaaacagctctagattcagggttctgttatagccgaacgcgagggaagatcttctactaataatgacacaagatctttatcaa  
gtagtgggaagactataagattcttttagttaccatcggcgtctcaacaaaactgtatgacccaaaacctcgggtccgctggggtaaatcattfaaaaaag  
gacaaatttagcggaggggctcgtacggtgtggggaactgcttttagaaaaaacgtattagtagcttatagcatgggaaggtacaaatttgaagacgcag  
tattaattagcaacgtttgtatagaggatatttactcttttccatccgaaaatagaaatcagacgggatacaaacgcaaggtccgctgaaaaatcacta  
aagaataccacatctagaagaacttactccgaaattggacagaaatggagttgtgaagttgggtcctgggtagaacaagcgcgatatttagtaggtaaataa  
cgctcagatagcagcgaatcgtcctatctcgggaagctgattattacgggccaattttgtcttgaggatccactcaaaagaaactctcctcaactaccgat  
agggtggaagagcagcgttctgatgtgaaatggatccagaggatccctcgcacataatggttcgtgtatattttcaaaaaacgcgaaatcaaaagttggggata  
aagtagccggaagacaggggaataagggtatcttcaaaaattttcctagcgaagatgccctatttcaagatggaacgcctgtttagatggtttcaatccctt

aggagtaccctcccgaatgaatgtgggacaaatatttgaagctcgcctggattagcaggggatctgctaaagaacattatagaatagcaccctttgatgagagat  
atgagcaagaggctcaagaaaacttgttttcaagaattatagaagccagtaaacacaaaaaaccgtgggtatttgaacccgagtagccgggaaaaagcag  
aatatttggatggaagaacaggagaccctcgaacagcctgttctaataagggaagctctatcttaaaattaatcatcaagttgatgagaaatccacggacgctct  
actgggccctattcactgttacacaacaaccgftagagggaagagccaagcaaggggggacaacgaataggagaatggaagtttggctttagaagatttggg  
gtgtctcatatttacaagagatacttataaatctgatcatctatagctcgcgaagaaatactaacgctacgatctggggaacgagtagcctaatacagaggat  
cctccagaatctttcagtgctgttcgagaactacgatcttggctctagaactgaaccattcctgtatctcagaagaactccaggttaatagggaagaagttgat  
cggataaataataaattctttctatttctatttattgattgacgaatataaacatcaacaactcaaatggactcgtttcccctcaacaataaaggctgggtaacaaa  
acactacctaattggggaagtcgttggcgaagtcacaagccctccacttttcattataaaaccgataaacagaaaaagattggattgtttgcgaaagaatcttggg  
cccataaaaaagcagaatttggcttgggaaattctcagcgcgagcggagctgaaaacgaagacgaaagatttgcgcaaaaatcgggagtagaatttgggattctc  
gatacgaagatatacaatgggatacatcaaaactgcgatgcccgtgactcatgtgtggtattttaaaggcttctcctagttatctcgcgaatcttttagataaacccctaa  
gaaattggagggcttagtatggcgatttcttcttctagccagtgctaaaaaaccaacttcttacgattacgaggtttatcaggagatgaaattcactctgtaac  
catagcatttccccctttttctacccagcgtttacaacattcgaatcgggaaattcgcagacggagcaggtgctattagagaacaattagcagatttggatttgcga  
attattttagaagttctcctggcgaatggaaggaattagaagcagagggtatagtgaggatgaaatggaagatagaaaaagcgaataaagaaagtttttggatt  
agacgcgatcaattggcgaacattttacaacaaatgtagaacgaatggatggtttgtgcttattaccagttctctcccgaataaagaccattgtttataggt  
ctggggataagtagtgacttcggatattaatgagctttataagagatfaccgctggacaacaacttgcctatctataaaaaagagtaattagcggcagcaga  
tttagtaattgtccagaaaaattggtacaagaagccgtgatacacttctgtatgggtcccgcgggcaaccaacgagggatggtcacaataaagtatacaaat  
cacttcagatgtaattgaaagtaagaggggagggttccgcaaacctcgttgggaaacgggctgattactcggggcgttctgtcattgttgggtccttcaattca  
ttacatcaatgtgggttacccttagagatagcaataaagcttttcagctatttgaattcgcgatttaacacgaaacgtgctacttctaatgttagattgctaaagaa  
aatttgggaaaaaggaacccttagatgggaaatactcaagaagttatgggggacatcctgactgttgaatagagcaccctaccctgcatagattagcacaagga  
ctttccaacccttttagtagggggcgtactatttgttacacccttagtgtgtaaaagggttcaatgcagactttgatggggatcaaatggctgtctactacccttacc  
ttggaagctcagcgggaagctcgttacttattgtttctcatatgaatctctatctcccgtattggggatcctatttgcgtaccaaccaagacatgcttaccggacttta  
tgtattaacgattgaaaccgtcaggtatttgcacaatagatataatgttgcgaaactatcacaacaaaaagtaaaatacaataaataaacttaagtatagca  
aagataaagaatctctttttctagttcctgatgactgggagcttatagacagaacaactctgttagacagtccttctggctccgatgaaactagatcaacgc  
gtcattgggttaagagaagttccgattgaagtcaaatgaatcttgggacttactgtgagatttaccactactagtagtgggaaatagaaaaaggaatccg  
ttctatatactcgcaccactctggctataatttctttatagagaatagaggaccatacaaggatttagtcagcctattcatacactatcaacaaggaagtt  
gattcggggatgccccttccaggggactccgatttcgctagtatcatcttttccgcagcaatccagattgagattgaggaaaggaagtaactaagtttccgaat  
cactgactcagccattgtcgaatcctactcagcaattgtcgaattatactcagcaattgtcgaattatactcagccgaaaaaggggacttattttagcgggaacg  
ggcaactctgtcttcagaataaagagatagatggaactgctatgaaacgacttattagcagattaatagatcattcggaaatgggatatacctatatactggatc  
aaataaaaacgctggcttccatcaagccactactacatgatttcattaggaatcaggatctttaaacaatcccttaagggatggttagtccaagatgcggaaca  
acagagtttcttttggaaaaacactattattatggggctgtacacgcgtagaaaaattacgccaatccgttgaatctggtatgctacaagtgaaatfttgaacacg  
aaatgaattcgaatttccgataacagatccttcaatccagctatcaatgtcttttcaaggagctagaggaaatgcacgcaggtacaccaattagtaggtatgcgag  
gattaatggcgatcctcaaggcaaatgattgattacctattcaaaagcaattacgcgagggacttctttgacagaatataatttctgctacggagcccgcaaa  
ggggttagatactgctgtacgaacggcgatgctgatacttccacgtagacttgtgaaagtagttcaacatatttgcgtagaagagattgtgtactatcca  
agctatttctgtgagctcccaaatgggatgacggaaaaactttttagacaacattaatgttgcgtgtattagcaaacgatataatctcggttccacggtgactccact  
cgaatcaagatattggaattgggtatgtaaatcgaatcacaacccttccagcagacgcccatttccagcacaaccaatataatagaaccccttacttgcggag  
cacacttggatctgtcaattatgtatgctggaggtccactcatggcagatctggcgaattgggggagagctgtagggttattgogggcaatctattggggagcca  
gggactcaactaactaaagaactttcactggtggggtattcagggggtactccgacctgtacgatcccctcaaatggaataatcaatcaatggggatt  
tggttaccacacgtaccgctatggcagcctgctttctatgttatagacttgcataactattcagatcagatattctacatagttgactattcctcaaaa  
agctgattctagtgcaaatgatcaatagtagaatccgaacaagtaattgcggagattcgtccggaacgtccgcttgcattttaaagaaaaggtacaaaaacata  
tttattccgaatcagatgggaaatgactggagtagcctgtttctgctccacaagatcaagatcaaatgaatacttattcctttctgttgcaggaaggtatatttggcctcga  
tggctgatgatgaggtaaagacatagactgttgatacttttggtaaaaaagatagggaaattcctgattattcaacgcggatcgaatcattgccaatggtcattggaat  
ttgtctatccttctattcctcaaaaatattttagtttagcgaaaaaagcgaagaaatggttccattccattacagtatcatcaagaacaagagaaaagaaccaat  
cctgttttgggatttccgattgaaatacccttattgggttttactagtaaaactatagttgcttattttagcaccacgatacaaaaaagataaaaaagggtcaggaaat  
tgttaaatttagatagtagaccctagaggacgaatataggactcagagaagactcagagaacgaatagggagcccagaaaaatgaatataggaccgagagg  
aagaatgtaaaacctagaagacgaatataggactcagagaggaggtatgaaacctagaagatgaataggatcccagagaacgaatataaaacctagaa  
gatgaataggaaatcctagaggacgaatataggactcagagagggaatccgaggacgaataggaggtccagagaacaataatagggcccagaggataaat  
atggcactttagagggaagactcagaggacgaacatgggactttagagggaagactcagagggaagactcagaggacgaatagggaacccggagggaagattccgt  
cttaaaaaaggggttttggattgagcagcaggaacaaaagaatttagtctaaaatacacaagaagtagatcgggttttttcttcccaagaactgcatacttgc  
gagatcctcatcctaaaggacttgcacaatagattttaggtgagtgatacacaactcacaacaaaatacaagaagtcggctgggtgattgttcgagtgaaagaa  
aaaaagccataggaactaaaaacttttctggagatacttcttctgaaagggcgataagatattagggtgcagtttgataccactagaaagagaaaaaaag  
attcgaaggaaatcaaaaaaagggaatgggtctatgttcagtgaaaaaaattcctcaagagcaaggaagaatatttgggttgcactgcagtcgctgatga  
aatgaacgaagggaagaatttagcaaacctttcccacagatctctcaggaagagggtaatcctcaactcactgtcgaattttatttctcatgaaaatagcaagt  
taactcaagaattatcatacgaatgcaattcgttcgaactgctttagtattgaattgggaacaaggaagaaagaggagctcgtcctccctgttgagataaga  
gcaaatgtctgattcgcgatttccaaagaattgggttaataatccactatttctacacgaaaaaggtatgatagcagaagtgaggactgatttccataatag  
gttagatgcaccaatacaattccttttccaagcgaagattcaatcacttagccaacatcaagaagctattggtacttgtgaatgaaataaagaataccaat

ctttgatggtttgtcggcatccaactgttctcgaattggttttttaagaattcaaaaaatccaatggggtaaaaagaatcgaatcctagaattcctattccaaaatgttgg  
ggctctttcgaattttcgggactcttagtactattgcacctagtatacgaattttctctacttactattactaacgtataatcagatcctgttaaaaaagcatttgc  
cttgacaatttgaacaaaactcaaaactcaaggacttaaacactcttaataaatgaaaatcaaggacttcaaatcagatgaacatcatgttgatccattcc  
agttaaattggcactttccctcatgattctgggaagagacatcagcaaaaactcctggacaatttttgcgaaaatgtatgctattfaaacgcacataaaaa  
atcagggtcaaatctcattgtaaatagattcctttgtataagacagcgttaagccttattggccactacaggagcaactgttcatggtcattatggagaatccttaca  
aaggggataggttagttacgtttatatacgaagagcagatctagtgacataacgcaaggtctccaaaagtagaacaatctcgaagcgcgttcaattgattcact  
atcgccgaatctcgaagggagaattgaggttgaatgagcgtataccaagaattcttggggccttgggattcttgattggagctgagttaacctagcccaaa  
gtcgtatctcttggtaataagatccaaaagggttattcgtatcccaagggttacagatcataatagacatatagattattatagccaaagtaacatcaaaagtgcgg  
gttccgaagatggaatgtctaattgtttttcacctggggaaftaattgactattgcgagcagagcagcagggcggttggatgaatcgtatctattatcgggca  
tcttattgggaataacagggttccctgaatcccaagtttcatatctgaagcaagtttcaagaaactgctcgaattttgcaaaaagctgccttacgaggtcgtattg  
attggtgaaagcctgaaagaaaacgtatctctggggggtattacctgttggtaccggattccaaaatgtgaccggtaccacaagacaagaacctttattt  
cgaattcaaaaaaaaactatttgcgtcggaaatgagagatatttgttctccatacagaattggttctctgattctgacgtaacaaactttctatgagacatca  
gaatcaccatttaccattatattgattfaagatacaaaagcagatttttacttfaaactagattttgacctagaacgctaagaggttagattttctatttttaatt  
taaaaaagaatttagtaattcattaaggttatgcttatacctagtagaaggtccatcggaacaattatttttaacttcaagctatttccgctcttcttaacttcgaaaaa  
aagaaattcgtaatggaaggttaggtagaaaaaaagaaatcaaaaggaaggtggaaaaaatgacaagaagatattggaacatcaattgaaagagatga  
tagaagcgggaggtcattttgtcatggtattagaatggaatcctaaatggccccctacatctcggcaaaagcgtaaaaggtactcatattacaatctcgtgaac  
caccgtttttatcagaagcttggattgattttgatgcagcaagtcagggaaaaagcttcaattgttggtaacaaaaaagagcagcgggatttagtagcatcagc  
tgaataagggctcgttgcattatgtaataaaaaaggttcaaggtgattgtaacgaattggtcgtacttaaaactgactttctcaatttagaacttaagagcagaa  
gaaaagatggaaaaatccaccatcccaaaaagagatgtggcaatcttgaagagaaaattactaccttgcgcaaaagatatactggcggtgatcaaatatagcag  
gttgcctgacattgtgactcctcgtacagcaaaaagagtatatagctctcgggaatgtgccattttggggattcctactatttttagccgatacaaatgtgacca  
gatctcgcgaatatacgtatccagccaacgatgacactatgacttcaatcgtattgatttcaacaaatagattttgcaatttggaggccgttctctatataagaaa  
tcaattgataagaagatgtaattcttggcaactcgtatgattatggaatcactactattctttttgttgcatagaaaaagacggggaatattgatataattag  
agggtattgatataattatcatctgatgtgattctgatatacctaaatataagattaactctcacgttctgagttgagaaaaagatggttgaatcaaaaagaattcttttt  
gaagttcatttttatcaggggacaatagaatattataccgtgtccatfaaaacactcaaggggttatacgtatatacggcgtagaagtaggccaacactctattgg  
caaataggaggttccaaatcagcccaagacttactcttgggtcgttaactactcttctgctaggttcagttatcagctgttcgcaatcccaaaacctccca  
ccgatggtcagaatttctcgaatgtcctgagttattcagacttaagcaaaactcagattggagaagaatacggcctgggttcccttattggaactatgttctt  
ttttttttgttctgaactgtcgggtgctcttttactcttgaaaattatacagttaccctatggagaattagcagcggccacgaatgatataaactactgttctttagc  
ttactcacgtcagcggcatattttatgcgggtctagcaaaaaggttaggtatttcgagaatataatcaaacctccatcttttaccatcaatattagaag  
attccaaaaaccattatcgttagtttgcactttcgggaatatttgcggatgaattagctgttgttcttctttagtcccttagtagttcctataccggctatgt  
tcttggattatttacaagcggattcaagctcttattttgcaacgttagccgcagcctatatagtgaatccatggagggtcatcattgaattgactagtttcaaaagag  
tcttttttagcctaactcaattcatgcatggttgcggaaaatcgttgggttggaaaacaaaatagtttagaattgcgtatgaatatacaatcagattgtagaagagag  
aataggctatattacggaattgccaaaagatataagccattagggaaggcggagtcagcgtatagctatatacctttatgtctataagttcagtcactttttagtgg  
gttccactttaggaattttttgaatccgattcaatagaaaatgagaaaatcacaaaacaaaatagagaacaaaatgatattggaatattatatttcccaagttaga  
tcaattatcaatccgatataatggaatcggatccatccaatcagatgcagcattattgttaactcatttggatcttggattaggtcgtattcc  
ataggggttctctctatttccatttattatgaattagatagatggggaaaaatagaactcaaggatcgaagaggaaggaaggaatggaatgaaagat  
cagttggttgaagaagaagaaatagaataatgagtacacaaccttaatgattagaactaaaaaggaatcctcgaagcagttcggagaattcagattatcgtt  
caattgtacttttagtactctgccaatagagcttagaataatgaattcttgggtgattgataccttaaccatttctttttgacacaggaactcatcaatccact  
aattgctgctcctcgttattgctgctgattggcgtagcttcttcttattggcctggagttggtcaaggtactgctcaggaacagctgtagaaggtattgcga  
gacagccagaagcagaaggtaaaaacgcggtactttattgcttagctagctttttagaagctttaaacaatttaggactagttgtgactgctgctttatttgcga  
accctttgttfaatcctaaaaaagaaaacgagctcttagatagatacttcttcttttttagtaattggtatttcttctgcaattcaattatataactttactcctaat  
ttactcctagattttctattttaggggacagacaataccaccgggaatagctgattgagatgatcaatttagaggatattgctcggcgtcttctccggcc  
ctttgttagggcagtgaaaatgttttcttttatttttaggaatttgggaacttcaacaagaggtctttcacaggtcaaacgagatcaagactaaacttaaaaga  
aattactaaattgaaactatttctattaaaaaaattgcattaaaaaacgatcaaaaaggcagcgaagtaagtgtacgaaaaacttggctttgtcgtcctatctat  
aagaggagagcatatgaaaatgtaaccattcttctgttttttagctcactggccatccgctgggagtttgggcttaataccgatatttttagcaacaaactaataaat  
ctaactgtatggttgtgtattgattttttgaaaggaggtgtgtcaggttcttattcaagaatagattggatctatccggctgcactttagaataatttttagatttt  
tcgaataaataagaaaagggtgcacgatctcagcaattactctgaataaatgcagaaatcatatgaagaacatagcatttccgcacctattggtaaatcaaatca  
actttgattctctatagaccaataatagaccattaacacggftaaagctaaactcgttgaagcttaggcaaaaagggttactcttctacaactatattagttatgta  
ccaatgctttaaacaggaatagctaatgtagaatttctgatatagaacactafatcgaataaatggttgaactattactagaagggcaccctgccctttttat  
ccaatgccgaatcagacactatgtataaaaaaggagaaggttttggatttgaagaaaaagtaggaattcattcttcttcttctatttattgttttctaat  
gaaattgaaaatttactaaagggcaatacaataaaaaaacacttctgcccacgatagatttttctagcggaaagagctcttaattttatctagctctatata  
gggttctggtatattgaaatataaacgaaaagagagggtagaggtatggctcattacataaaaaaatggaagtagccatagcaaaaaagaaaaaggga  
gcgtgagagccaaatgaatcgaagattcatgtttgtcgggaagagatcaaaaaggtgtaacttaatagcaaggaatcactttcattaaaagatttattagataa  
tcgaaaacagaggtctttagtactatcgaattcggaaatcgtgtagaggaaccattgagcagctcgaaaaagctcgaattcattacagaaaagtcgaacta  
gaagcggatgagatcgaatgaatggaactctgagatagaacgagaaaaagcaaaatttgattaatccacttctattagtttgaacaattgaaaaagtcataaac  
gaacccttattttgaaaacaaaggcgtatgaatcagctccgacaacgggtttcccaaacagccgtacaaggagcttaggaactcgaatagttgttgaatacc  
gagttacatttccgtacgattcgtctaattatgactctcggggccatggaatggaaggttaataatagagccttgaacttacttctttagaatttagcattat

tttcccttctccgaaaaaaatagtaaaagaacactaatggcaacccttcgagtcgacgaaatcataaaattctccggaacgtattgacaataataatagaa  
aagtagggattgagaatacggctgcgtatgcaagtgggggatgggattgctcgtattataggtcttggfgaataatgtagggcgaattgagcaattgcaagaag  
ggactagggtattgctctgaatttggatccaaaatgttgggattgtattaatggcgatgggtgatgatacaagggcgatttggtaaagcaacaggaa  
ttgctcagataccgtgagcgggcttacttggctgtgtataatgctctggctaaactattgatgggagagcgaaattgtagcttggatctcgttaattgaa  
tctctgctccgggtataattccaggcgtctgtatataacccttcaaacgggcttattgctatcgattcgtattcctattggcgcggtcagcagagtaatt  
attgggacagacaaccggcaaacagcagtagctacagataaattcctcaataaaaaaggcgaagatgtaatatgtttatgtagctatcggcacaagagc  
ctccgtagctcaagtagtaactactttccatgaagagggggccatggaatacactattgtagtagctgaaatggcggattccctgctacattacaatacctcgtcct  
tatacgggagcagccctggctgagatfittatgtaccgcaacggcatacttaataatfittatgatctctcacaacggcacaagcttaccgaatgctccttct  
attaagaagacccccggcgcgaagcttaccaggggatgttttatttgcattcacgctttagaaagagccgctaataaattctctttaggggaaggaagta  
tgactgtttaccaatagttagactcaatctggagacgtttccgctatattcctactaatgtaatcctattacagatggacaataatcttaccgagatcttcaat  
gccggaatcggcctgctattatgtgggtatttccgttccagagtaggatccggcgtcaaaftaaagccatgaacaagtagctggcaaatcaaaftggaatta  
gctcaatcgcagagttacaagccttgcacaatcgcctcgtctcgtataaaacaagtcagaatcaattggcaaggggccgacgattacgagaattgcttaacaa  
tcccaagcaaatcctctccagtggaagagcagatagctactattatatacggaaagaggatattcttattccttagaaattggacaggtaaagaaattctggatg  
agttacgtaaacacctaagataactaaactcaattcaagaaattatacttctgaagacattcaccgaggaagcggaaatcctttgaaaggaagctattcagga  
acaactgcaacgtttccctcaggaacaaacataaaatttgcacgtctactctttagtagaagtagtagaggagaatcgttgaaagattttcatttgaatca  
gcaaaaaaggtttcttagttttatagtagtatttfaagaatagatagaataagattgctcctaataggattgaaactataccaaaggtttagaagacctctgcctac  
cattagacaatggacgctttttcattttctttctttcttttcttttcttttcttttcttttcttttcttttcttttcttttcttttcttttcttttcttttct  
ctgttaaacataagagaggggaactagtggaataaaagggggttgaatagcgcctctaccatactatacaataagataatgacctttatcacagaattgtaagag  
ggctcttctacgatcaatccagaatccatacaaatcgaagggatfittatccttaccactggatctgttgcaccggtaacaacatgcataaaccatttct  
cgaagtagtgcggatagcccaagctctgatagttagctctaggtctccggctcaaaaaaacacgctgatgaagcgtgtcggctgactattacgtggcaggga  
ttgcaatfittctcgttttctgttttctcactcaactcaaggttaactfittctttcttttcttttcttttcttttcttttcttttcttttcttttcttttct  
cctctctctctaatcaactfitttcttccataatgtccgttctactatctaccaagatatacgtttctaatcctagatggaaaaataatagaaaaaagaaatcaagaa  
ggcggatcctccccctcaatcaagagtaafgaactagggtgctgatacagtaacaacaaatcaactaaatcaacaaactgctgatgttgaggcaatcaagaaagc  
ggcataagtgatataaaccacggaaaagtgactaatcccacatcttcttgcacatggaagagccacggccttctctccagcaattaaatagcca  
aaggtgctcgtcatgagccatgctaaagctcaatfcttctgcaatccacggcgaatgaacataatccagtcgccaacaaagatgtccaaata  
agaacatccacgccataccgataactattcctccaaaaggattatccatgataaggtgtgaaggttaaccataggaatcttaccatccatcaataa  
gtggaggatcattaaattggaacgttccctgccaataatgtatgtttccaatgcaataaaaaagtaaccatccaatggtatttaacatccagaaaactgcca  
ataaaacgctcccaagcagaatatacaagtagccgcgaccaggggcctgcaaggaaaactatataccaaatctttttatccggcattatttgaaccgc  
gtcatctaaagcacccttactaaaatcaatgtatgtatgcaaacctaaagcaatagcatgatgaaccaagaaatcctcaggtcctattgttaagaaaagcgaatt  
actattctgtaaacgactcaacatccgggtaaccataggggtcaccggcattgaaagcgggaccgctcgttgaagataagatatacgaaccatattgctg  
cttaccatgagccgattgtatccattgagcaaatataggttcgatcaagattgctttctggagtagcaaaaagcaagcatgacgtcattatgaacataaaggcccaag  
gtatggaatcctaggaagagactagcccaactaaatgagatagatagcttctttatggtcaactcttgcacaatcattcctcattctgttccgattgtaatctc  
aatgaaaaaataagctcatgagcaaaagccctgctatgatgaacctgcaatgtattggtgatgagatataaagctgctttagtagtaaaagcttctgtctatgaat  
gcataagaggtaagagtagatattgtagctactaaggaagtaataaccctaaagagctagagcaagacctaattgaaatgaatcgaattattgattgtctg  
taaagccccttaccacgccctaatcgaacccccggaggatgtgcttctaaagatctttagactgtcccaatccgaaggttagctgatacatagaccgg  
caatgagaaaaataatgcaatagctaaatgatgagcaatcaggtcagccacaacttgtgtttggtgatgaaatcccccaagaaggttagaatgacgttc  
ccgctcctgagtgtaaccaataatgattactgaaatcggggtttggcataaagattcactgaccgtcagaaggggtcccaacccctgtggatagggaat  
acatcaagaaatfctcagcaactactctccctggatgctggaatagcgacatgaaactaatgtcctgccaagccaaagaacttaccggaaaagctcgtgac  
aaatgatgattgagcagatfctccgcttttgaaccacgaaaggtctgtttccatttgggtgtagatgaaccaaccccttaagatagggtagaagaaata  
atagaaaaagagctcctgtataaagatcttcttcttccgttaactcaatgtataccaccactgataaaccagaaatagcgtatctactggaccggcgcctc  
ctcagtagtaaggttccacagcgggttaccaaaatgaggtatcccaatcgcataagcaataggtcttacgtgaaaggatcctgtatccatgattcaaaatctctg  
ccaagcagatgaaacagattccggacgtccatagaagattattgctaattgccaagtgagaagcaaaaatgttctgataaagacgttctcagtaaatatcat  
atgacttccgaaatcgtgctggtagcaataaccaacaaatcagcagtagtgggtcctgagtaagccttggtaaacctgggaatcttaattccataatgcc  
ttcaaatcctctagccactatcctactgcaataatctcgtcaagaagatcccatgttggcaattccaccagaaaggaatgggtactctacagcactcct  
tgtataatgctcaaggctctaggctgagtagcaggagcaacttfaatttattatgagcccaacgatagattcaatcagttcttccaataaccacggcgtgaata  
aaaactaaactgaagcccagacaaaatgagcacctaagaaaaaaagaccatagcggataatgaagaaccataagactgaattacttgggatgctctgccc  
acaagaatctcggagccaccatfataatgtaatggaactctgtgcaagtttccccctgtgatagattaccacccttgatcacttattagtaccacaaatccga  
ctgatttccaactgaaatgaaaatgactaccgaaatggaattgacatccagaatagacctaagaaaacatgatccaggcggatactgacatgttccccctg  
cccaggcccacgcaagggagcgaacaaagatttctttatcgggtatcaaacgggaactgcaagcaataaaacaccttcaaaagtattataacagtcaca  
tgattgtaaatgctggaatgtatgtagtaaaaaatctcgggttctaatggaatggaacaaagcaacttggcctactgctactaactcaccctccccac  
gtaagctgacttgttggaccaggagctgttacgtagcgcgccagatggagattttagaccattgagcaaaagatcgggtgaaattgatggcggatccg  
aaaacatattctgggacacctaagcactcatgtatcattatgaatgtataaaccaaaactgtgaaaacctagaataatatacaccagttaaaggtggatgat  
tgcacacgggtctaaaggacacgatctaataagatcgttctcagctcgttggatcatagctcttaccataaaaatggctgcatgtgacgagcaccacattaga  
aatccgcaatccacatgtggtgtgtaacaaggaaggtgtgaccatagtcagtagctaggatgtagagggggcataagtagatcatatgatgagctacaacat  
ggttagagcctagcatagtaggtaagataattgagcatgcatggtttaggattatagagacctttagccctgtcctgtaaatggcctttagag

ctccaaaatatcttcaggccatgaccaatacccgattggctctatacatgacctgcgatcaggaaaagaatgcaatagctaaatgatggcgcgaatatcgc  
tcaaccatagaccgccggttattggatctagccctccgcgaaaactaagaatctcgcttattggaccaattcaaggtgaaaaaggggttctcctcggcaaaa  
ctaggataaagttgacccaaaaggtcgcgattcaagataaattcatgaggaaaggtatctcttaggatcaacccagcgtcaagaattggtaatcggtaagat  
acatggatttgggtccccgccaaagaaagagaccaagctctaataaccctgctaagtgatgattcaacatggattctacgtcttgaaccaggctaatttgggagc  
ggcttggataatggaaccaccagcaaaaagcattaacgatcaaaaatcaatgcaccgattcggtacaatagagttgaattcactagttatccggatgctc  
ccaaatctgaaaaaacccggaggttatttggattcctcggaaacccccgctacatcaccattcaatattcttccctacgattggccaaactactgagcactgggt  
ccaatgtgagtagatcacttagccatgctcataattgaaaaacgggcaccatggaagtagatgacctcaaccaagaagataatggagagttgaccgaaat  
gagcactaaaagactttcagagatctcctcaaatcactgtatgactatcgaatcgtgagcatagatggttccagatccaagtggtatgatcaggccctt  
agctattgtcttgagaaatggccgggtctggccattcctcaaaagatgttttacaggatccctatccacaacaattttactctggtccggcgaacgaatcatcatt  
aagtcctccttccggacaagacatacaaaagagaccgcccaactttttagtaaccttgaagatagatattatgattatccttttcttactatctaccgtccttat  
ttttttatgatttactcggagcaattatattgaaatcgaatcgtaggcaaggttccggtatattatgacataaggattgggtgcctaaccggacttttttacttggattt  
tccacgtaacaaaaaaccttttttaatttaaaaagctagctatttttttaagagataaagtcctatctatacttctcctgagcataatfatagttttttatcgtatcc  
aaattcaagataactcattagaatttaataaagatggctctgatatattgcaatattatfagccctttttatcgtttattacttctatctagaccctatcgtttatcctt  
atgaaatataataaaaaagaagcagaggaagagataataaagaattcttgatcgtctccgacctaatttattgattaatggatcaacaaccaaaccctt  
tctgaaaaagagagtggtcttattcaaatcaaacgctcgtgtaattcacaaccagttctgtctcaatataattcccggagtaagcgtatagcttggccaatact  
cagcagcttgatcaaacagcttctgcaattctgaatcaccctgtagaagggctgtctccccggcgaataggtatgcttcccctagaaaccgacttggagag  
ttctactcctacagcctcagaattgctatcttaattccttctgaactgaattcgaattcctcaaaaatcgaatcaatttcttgggtacgcagaagaagtaatta  
cctaagttcacaaccctaaattttagataataatcagttgacttttcccactgcaaaaaatgaagcagataatgacctatactctcctcggatcgaactacaccgctc  
aactatctcggttcctatatagaatttctataaactctgaaaaagacttttcccataagcaagaaaaaagaacttactatcttgggactgtaactacaccgctcgt  
taatccttagtgatcggctctattacataagcggattcctaaatttggccccatcatgggataagtaagcagtttttttagttgacccagcggctactaatt  
gatctttacggcttctctatcaatttgaactctatcatagatgtagtaggacatacttcttctcctattttagttcgtgaaagtccttctctacagctgat  
aggcacaatcgttgtttgacgatccctatgtagaaagccccctttctagtaaaactagaaaattgatccttcttatttttcttctatagtgagatagcgcacgta  
atgacagatcagggcattatttaaaagcttggtaagaaaggggttctgtagtgcggaaataatttcaaaagcctttagtctcctcattgcttgggtgata  
aggcctatgttatagatataaactcctgatcataggatcaatttctagcgcgtgactcataataatttgaagctccgcataattcctcggattgagccaacat  
ccgttaccgctcgttcttctcaaaaaatctcgttccaaaaccgacatgaggttttccactcagcgtcctcctctgtacatagtaactaagcgaaaaaatc  
gagaataaaaaatagaattggtcattctcattatgaccgaaaggggctggtattttcagaatctctagccaaccctcccacaagaggttttctaacaccaatg  
aattctattaatgctagagaaaacgatagctcaagaatttcttctcaacgctcctatttaggaaatagccactcaacgatctttaggtataggggtatc  
caaagtacaactgatggttgtttatccaaccattctcccagcctgataccaatcaggaaagggtaatttcaaaaagtttcttcttggattcctattctag  
gtgtagtctttatcccctatgctacattagtagtagtagtaggattagcctgtaatacagaacctatcctgtaggtgaaccttctgctcaactaaaatctaca  
ttgaagcatccgagccgcgtcagcggagacacgacagaaggagttgtagtgcactcactcctcaagcgtgggttccctactaatttggtttctcctccgc  
gaacccccacttctctgtaaaaccggggtgtaggtaagggcctaaaaaacaacaaaaaagagtaaatcgcaccatctataaataagtaaatgcccccttcccg  
gaggttgcggaattatcgaataaaatattgctacaattgagaaggtctatcaatgaaatttccattatagggatcagcataattccaacccattctatcatt  
tatatagaattctttcattcctcacaacataaaaaaaacaaatccattcaattctataaatcagtcctatgctcacaatggataagagaggtatttctgctc  
agcccaattctctcttttctctgtttgaacaagaagagatagaaaatattgactaagattgatttattcacttcttcttctcaacaacaactctctcatca  
actatttgcattttcaagtcattaatcgtccataccctatttctatttattgattgatgggtaggataccttgcacaacagaattctaggggtcctttttatcgaataaga  
agaattctcattctcttttcttgggttgggaaaacccaaactaaaactttcagggagcggaaattcctagtaaaaaatcctggaccctgaccacttagatgaaa  
ggaatttctatctataagaacaatggaactctcgcgcggttgggtgactgactgcaggaataggaaaactcgtattcactcagtttttccataaagagat  
atggagagagatggccgagcgttcaaggcgtgacattggaactgctatgtagcttttggaccgaggttgaatcctctcttccgttttcttaattcagcaac  
gttaatgattacaatgatacaaatcaatgacaatttattccagcaataatacaatccttatttaataagaattctctataccaattactatggtatgtaaaatc  
aggaagaacaaaaacaaaaaggaatcctaggggttaatcattctgtaggtgaaatgggaaaaacgaattaagagccttaggtcgtttatggtcggggaag  
ggagggggaagaaattctatgaaccttccgttttcttaagttcaagttgacgagagtaattctacaactaacaactcatttattttagaccgaccacttctat  
ccagatttttttactagcttcttattgcaatgtgcaatcgtcaaatgcttggcaatttccccgggctggaagcaatagaaatttgaaccagcgttttgaatc  
ggttatcctcgtagtaataatctcggggttgcacgaaaactgttatatcactatcagaccatacaaaaatgctatggttaactaattgcccggcctcgg  
gaatggtgagccatacctaactgaaaaagatatttcaaacgcaatttctgttttctggaagcaatcagatattgttcttttccagaatggaatttcttca  
tctaagtaattgtcgttctgtagaccataatgaaaacgcaatttctgttttctggaagcaatcagatattgttcttttccagaatggaatttcttca  
ggatttaggtgttttctagtagtctggttaaagctcccagacggcgtattttttaaagcaggttctcgtataacgggacatgaagactccttttttgaat  
ttacacaataatcattgtatttaccattacgaatacatcgaattaaaactgaattaaagtaaggataaacagagtaaaatctactaaaagtaccacaaaaaatg  
aatttcatcaactcgaattttgtatataatttatttttattgtttgtatctagcaaaatgtagggtagaacgacataatagatcctggcttccatttaattcggaga  
aaaagaggtattttgtcatggaactgatagagaaaaagccgactatggattgaaccgatgacctcgcattacaatgcgatgctcaactctgagctaag  
tggcctacataacgaaatagtgtaacaaatagaatagatgtagtaggaaatcgtaaaatgtagatcttaattattaatcttagcttataactagttcgaattg  
aagttacttagaaaaaactagaactcataaaataaagttagatagatttttgaacttcttttcttaattcgaacttattttctaatagaatctattcaattc  
tatattgaattgattttagatattttatattgatagctcggacgaataatcctaatacatggaagaataaataatataatagcaaacataataaagagaacatcgc  
aatttctgtattttagctcattatagacattttttagatattttgtttttgtatttgcataaatttaattgattaaatatttactaaggagaacatagaatcatagcaa  
tgaattgcaattctgattagcaaaaaaagaaatgaatcaagcgtatagtagatttgaatactctaaaaaaggacgcggtaggtgggggagagaaaaacc  
tgggataattgattcgaattgcaatacatcaacgatagaatcaattcaatgctgaattgcaataagcggagctctcaactagagacgaaccgtagacta  
catagagtaataatcaacgattcaaaaaaactaacagatggaggaaattgcacaaggaatcctgctcacaagaaaaaagaaatggggaatggcgaatcgc

gtagacgtacggacttgattgtattgagccttggatggaacctgctaagtggcaactccaatfcagagaacctggaftaaaaaggggcaatcctgagc  
caaatccatgtttgagaaaaaacgggtctcgaactagaacccaaggaaaaaggataggcagagactcaatggaagctgtc taacgaatcaggttaattacg  
ttgtgtgctagcggactcccttcaaatagggaaagaagggtctc gaaatctaatacacacgfatagatactggcatagcaaacgattaatcacagaactcatat  
cataatataggtcttfaattcttttaaaatgaaaataggaaatgattatgaaatagaaaatcataatcttttagaattgtgtgaatccattccaatc gaatattgagtaac  
aaatcctcaatcatagtttcgaaatcttttaaaagcggattaatcggacgagataaagagagatgccattctacatgcaactgacaacaatgaaatcttagt  
aaaaggaaaatccgtc gacttcttagtcgtgagggtcaagctcctatccccaaacctcttttattccctaactctagatttatcctgttttttattaataggttaac  
attcaatggaatacattctttttattatagtatcggcaaggaaatgctgattattaactc gatattaaatattattaataggcttctttgtacaatgcataggactgcccc  
tccccattccaaatfttggatattgacatagatacaaaactctactaggatgatgcacaagaaaaggtcaggatagctcagttggtagagcagaggactgaaaatc  
ctcgtgtcaccagttcaaatcgttccctggcagagaaaaaggatcttccgaataggattgatacaaaactcgcagatgggttgggatacatattcgttaataata  
tagatagatgattttttcatctaagtagataaactctaaatagaggcaactcttttctgatttttgcattttcttaattttctattccgctattccgacaatattttttattct  
tgcttatctattcttcttctgattgttctaaagtaatgcacgcggtaaaaagttctgttagggaactctttgagtcacatattttctgttcacagaaatgaata  
gtgattttccaacgaaatgaagccctttttgcttagtctatctgaacctttgtataattggaattaatgaaatgtaataggattctgtttcatctaggaaacagagcgtaa  
aaatattcctgactgcataaaatctggagttgtgtgtataagtgagcatgaaatcttatcattcaatgagcatctgtattcatagaaattgggggttatatagcttta  
cgtaaaggccagcctatccaacttcaggcattagatacgttaaggcgtggatgattatcataagagattcccacatataaaaagattcgcgtttgaaaaatcgg  
aactctccaatccagaagacagatgggattctaggattatctttgggcaagactttatgcatacttcttgggttatctataactgatttctgtaagatgat  
acacgctagctaaagatccaccgggtgcacgacataagcacaatgggaaactgtaaaatgtaaccatacatataaaatgacagcaatgaaatccaaactcct  
gcttttattgcaaaagtctattctcgtatcgaagccaaagatctatgaaccacctatgtttgactagccaattagataaccaacctgctgattatctgactc  
tctcctttgtataaataattcgcagttcagtgcaagttgaaatattgcccctgctcttcttttcgcaaaaagagctcctcaattactaattgttaggaagatactg  
gactttggatttgaaaaaagttcagaagatagctcaaaagtagatgggtgattgataagcaattctgctcataagttccagatttagtactgcccgaacataaagcgtt  
gtggctgtagtaaaacatcgattttcttttgagatagagttcgtcctcaactatttctcgcgatattctttac gaagtttggtagggcactataacagcctctggttta  
ggtagggcaacctggcaagtagacgtccacaggaattaaactatcaactccccgaacagactataggaatccgactgaacattccaccagtaaatgatacagctc  
ccatagcaatgactgattttggttcaggcattgtctatataatctcactaaagaggagccattttcattgactgtaccgctgttaaaaattaggctccgttgcctagg  
actgactctgttaccatccataacgatcaaaagtcgaatcgtgagcctattaatgaagcaaatcaatgaacaacaactggtaccatataaggggcccataaact  
agagagcttgaccaatcgaagatcttttagttagttgaaatcaacggaattggaactgtttgtcaagtaggggaaactcaatcaactcaactgctttaatgg  
aatctttctctttttttttgtctgaatattcagtttaagaccattccaaggtccttttcccatgataaactaaaccaacaactaggataagcacgaaaatgaagc  
ttcgataaaaacggatataaccaatcgtcgaactcattgccaaagggtagagaaagaccgtttccacataaaaaacaacaaaactagcgcacaatgtaatag  
cgtattcggaaatgtaaccaagccccccatgggtctataaccgattcataactagaaagcttctctgctcttcacgaaccggagctaaaagtctgaaatcaa  
aatgctaaaataggaataagcgttctattatagaatgcccaaaaatatactatctggaagcagaacataaattgactcccattaatgtggaataggcggaaact  
gaaatgtaactcaagtcagcattgtcaattatagaatctctctcttctcctgggaacaaggatcgtttttctcaacaaaagggttagtttagcctttgttct  
ctttgccacgtctctttaaagattcatcaaatggaatcccactcctctttttgattacttctatttaggtatggtggagacataattctatagaacaaaactctc  
gcttcaattgtctctatttcttagaatctctagaaaaaggaataaaaacgaaataactatgaattagagcctaattaagatagatgactaatgtatgcagcctaataga  
ggagtaattctataaaaataaagaactctatttcagaacgtagattgatttagatttagtaactatagatagataagcaaaatatactcaacaagaatggaat  
ttgcaagatggagaactcttgcagttgattgatagaatctttttcttctctctataatttctgatgaatgagcctctggaatcctttctctattttatgagcgc  
aggcctctgcagctataaacaagctactaataaggaaatgaaaactatactaaaggaaacgtaggatattctctctaaaatctaaaaaggacatattaggctat  
accgattcgaaccgtagacctctcggtaaaacagatcaaacggaattatctgaaatgattcgaactgttcaaaagaccaacatgatttttgcattgggctctttta  
tcaactgatagaagatcagttagtcaccatagttttctttacgaaaagataatgagatggctcctgcgctctgattgattttgtattatgatctatcagagcaat  
accaaaagtttcaaaaggagattacctgacttaggtctgctccggcctaaatcaacctaagtgaaatagagctctatcgttccgtacaaagattgactat  
gagactcatacacttaaaatcagaaacgaaaagaatftttggagccctatctcattaaagcctagcatttagtgggctggaatttaccctatcaactagcaaa  
tcaataaaggtctattgttaggcacctggattgttacctgaaatcggactgaacaaactattgtcaggcagactgttctctattctcgaatccatgaagtaagacat  
tattttgcaagaagatccactatgttcaatgataaaagctccttgaaaaagcattggcgcacgtgaaacgagttgctctaccgaactgagctatagccctgtcag  
agatatcttaatatagagaattctgtcaagatgaatattcttaatagtagaggatattctgtatctgtttactataataacatacaataacgaagcggatattgctta  
taaaaaggattcgaatataatcgaatcgaagtaaaagggtcttctttgtgtgataaattgcctacttaactcagtggttagatgattgtttcactacggcgggagtcattg  
gttcaaatcaatagtaggtaggttagaaaaaattactagatagcattggccctactcgtctcgtatctataaatttttctaccctctcccttttctttgtatcaact  
aaaccgttgggtgtctcaattagatgggggaatccaataacagcctcgaactgtatcttagctcgtctgagagctacctcgttcaaccaattcttctgacctca  
gcttactcacgtagcttccgctatttcaagtcctgtttagcttctccgatcaatgtcactaccagttccgcatctattctcaaaatgatgatctcattattaactatt  
ctgcaaaaaccgtccacagaaccgccgtaaccattgatcgttggagggcgtattctcaaggaccatattctacagctgtgtaaatggggcgtggtttggttaa  
tacgcaatttggccactattagtagataaaatgatttcttcaactcacaateccaaataatcgttaggagtcagtaataaagatttaattcatttctcaattgttctc  
cttcttaagttatagcttctgtctagctctcatcgtattaccaccaataaaaaagcctgttcgggtaggccgtctaatctccgaaaggattagttgaaatcccta  
atagtttctgcaagaccaatacttcccggagaaccggtaaaaacttctgccaaaaaacggttgtgataagaagcgtcaattttctgctcttctacagttaa  
acgatcctcctcgataattcacaacccaagaattgcgataatgctcgaagttctttgtaacgttgaagttgcttaactctttgcagttcataatgttcgttcc  
gcaaatgtgtagcagagcagggtcgtcaaatcgtccgaggtacataaaccttggatcgaagttatagatcccttttagtagaagtaattcttcttccaaag  
aaccatttctgactaagtaggtgataaccactgcagagggcatttcccttaaaagcagatacctccgatcctgctgaacaaaacgaaagatattatcgtat  
gaatagaagcagcttcttataaacatctcgaaatattctgcatagttaggcagtcacaacaaactctacagagctcctggcgttcaattcatttggccataga  
ctagagctacctttagctctcaagatttttcaataactccagattccttcaatataaagatcatttctcagagctccctccctactccgcaaatagcga  
tacgccccgtgagctttagcaatattgttgatttaattccatgatgactgttttactactccagctcccccaaatagtcggattttctccacgccgataaggagct

aaaagatcgaccaccttaataaccagttcaaaagatgataatttcgtatctaactgataaaggcggcgccgatctatgaatagggaatgtgcactagfatctacag  
gacccaattgtcaacaggctccccaaagcgtgaaaattcgtccaagtagctccaccgacaggaacactgagaggagctcccgtgcaatcacttccattcc  
tctcatcaaccctctgtgactcatagctacagcttaactgattatcttaataattgtgtacctcacaagttacattaattgtctaccgctagctctgactcttg  
actaccaaaagcattataataaaggtaactgcccgggggaaaagtacatccagcaggggtccataatgtatgatacgcctgactcttttctcaattgtaga  
aacccgggacgagaagtagtaggattggttctcataattacacataatfcaaaaaaaggaaattatcgaattttgatttttctgtgtaataatgccaatcaac  
accaaaaaataatccaaaaatccaaaagcaaaaggaaatgaattgtaattcaataagagaaaaaggaccagcacttgattctgtgcccacaacgaatccca  
tcaatcgttactcatggaatgagtcctcgaaaagtcaatcaatcttttcatatacatfctgttaaacgattgtgctactctacttcttatctagacttcg  
atatacaaaatataactactgtgaagcatagattgctgcaacagagaatfctgtagtatttaggtattccactcaaaataagaaaaagggtctattaagaactaat  
aaggattagaagttgatttgggtgctctatctattaagagatatacaataaagatggatttggtaacaaatccatggttaataacgaagcatgtaacttaccat  
acaacaactcaattctatcgaattcctatagtagaattccatagcatagaatgtacacaggggtgaccattatataatgaatgaacatattatgaatgaacatat  
tcaftaacttaagcatgcccccttctttaaagattgataaattgaatattcttttaagattttgcaaaagtttcaatctacgctaatccatcagtagacccgt  
cgtgtgagaattcttaattcagattgttagggagggacgatgtcaccacaacagaaactaaagcaaggttggattaaagctggtgtaagattataaattgac  
ttactacacccggagtagcaaaccaaggacactgatatctggcagcattccgagtaactcctcagccgggggtcccccgaagaagcaggggctgcagtag  
ctgccaatcttactggtacatggacaactgttggactgatggacttaccagcttctgactgttacaaggccgatctatcacatcgagcccgttgggggagga  
taataataatcgtttagcttaccattagacatttgaagagggttctgtactaacatgttacttccattgtggtaacgatttgggttcaaaagccctacgcgct  
ctagctggagatctgcaattccccctacttattcaaaaactfccaaggctccctcatgtatcaagttgaaaaggataagttgaacaaatcggctgccttt  
attgggatgactatfaaaccaaaattgggattatctgcaaaaattatgtagagcatgttatgagtgctacgcgggtgacttgatttaccaaagatgatgaaaac  
aatcacaaccattatgctgtggaggaccgttttcttctgcccgaagctattataaatcacagccgaaaccggtgaaftaaggggcattactgaaatgca  
actgcaggtacatgcgaagaatgaffaaaagcgtgatttgcgaggaattaggggttccattgtaatgcatgactactaacgggggattccaccgcaatact  
agttggctcattattgcccgcacaacggcctacttctcactaccgagcaatgcatgcaattgtagacagaaaaatcaggtatgcaatttccgtgattagct  
aaagcattgcgtatgctgggggagatcatccacgctggtacagtagtagtaagttagaagggaacgcgaaatgactttaggtttgtgattattgctgctg  
attttattgaaaagatcgtctcgcggtatcttttactcaggactgggtatccatgccaggttataccggtgcttcagggggtattcatgtttgcatatgccag  
ctctgaccgaaatcttggagatgattctgtattgcaatttggagggaactttaggacatccttgggtaatgcaacctggtgcagcagtaatcgggtgctttaga  
agcctgtgtacaagctcgaacgaaggcgcgacttctctgctgaaggtatgaatattaccgatcagcttcaaatggagctcgaactagccgcagcttggaaa  
tatgaaaagcgaatcaggtcagccgtagataaactagatagtagactaagttgataaaattagatagaaaaaggctcaataaaaaagaagagaaa  
tagaaaagcaaaaatcagttacgaaaatgcagtaattcttcttcttaattgattgcaatcaactcggctcaatcgaaaaaagattgagccgagttaaatagat  
ttgatacagatgagactgacaaatcgggttctctattctatattagaagataaaaggtaatacaataataatacaaatatagattatcatatgataatg  
gaatcaaatcgcagttatcagaaaaagtttcttatttggaaaagaaatcagacatacaatgcaactacagacgatgatcattacccttaccgggttattctatt  
ccacttctagatagaaaaaaactaaaggagaatgaatgaaaaagacagagtttgaagttagacccttcttaagactcttcaaaaaagaggacatttga  
actttaaagcgcacaatcgtgagcaacaagtgactcgaatgctcgtaaaagagaattgatttcaaatggtagaactagatgacgaatttctataacctg  
atgaagaggtatgttttagttacgactccgatcaagagcgagaagcttctcattcagattgactgctatagaatcggaccatcgtagagacgtcaaaaggctcc  
tgatgataagaatcatacttccggaactccatgggctatgggcttcaacgcggtagacgttttctcgaattttctggagcaaacctccgaccaacgatacaa  
tgaattttctattcaaaaagaaaaagattcgaatcgaatgctactatagcaccggaggaatattcgaattatattctataatccattttgctcggggtctt  
actaacaggactcgtcgcagagacgaggattcgtcgaaaagctaaagtcacccggtattttcattacccttgggggtggtatattgacctacaaggtcaagggg  
agtagagatctgtataggtaaaagaatttgccttattgattgtagtatttccctccttaccgcgattattgtatagcttctagaagagcagatgacagagag  
gaaattacagtttaaaaaagcctaaaaagttcaacttacggcaatcaatcaactaaaagctctatgatcaatgcttacagcggatttgggggtccgagag  
tgggtgaataagattgcatgtggaaggagtagacgaaaagatttggattcgaataggtgcaactcactaagtcgacttgaatcaattcaagttcgattaga  
aggatagaaaaggccgcgagatcggaaaagaaaaatcaatctttaaattgcttctcttttctattttctatttataataatccattcatttttttagaatact  
aaagtattcaaaaaagatttctatactataaaaaatctttttgcaaaccaaaaatacaatagcaatattcgtataatagatatacttaattatataagaatcfta  
agatttttgaatagatcaaatcgaatagatagaatagtaaaattgaaaggagacactattctatgatgattttaaactaccctctatttctgctttagtaggctta  
gtattccggcaattgcaatgcttcttatttcttattgctcagaaaaataagattgctgaaccgacgggaccgaatttctcaatgatttccacacaggaatcataata  
cggatctttgtagtgaatgataataatgtagtattgctccttctacacaaaatcgaacccgctatggatgggattatgtagcggatagagctacgag  
cataaatgcatgcatatcgggaaccgggtatagcagtttttaagtggaatcaaaaatcttttgaatagaaagcaatgtagtcaaccaatattttacaggagtagc  
tagttggcgaagcgtttcagaatcaaaaaagtaagtaaaagcaaaaatcatttagcttattctcaatttcaatcaccgctgtagtatataatgaattggcg  
atcagaacacatatgtagaacttcaaaaggttctcgaaaaagaggtaatttttctggcctgtattcttttctaggttactaggttcttagcgttggggttcca  
gttatttggtaagaattatattctgtacttccatctcaacaaatcttttttccacagggggtcgtgatgcttctacggaatcgcaggcctattcattagcgttactt  
gtggtgactattttgtggaatgtaggcagtggttagaccgattcgtatgaaaagaggagtagtgcatttttctgtgggattccctggaataaacgtcgcgtc  
ttcttctgattcttctgctggatcaatcaattagaattcaggttaaaagaggtcttttctctgctgtagctttataggaatccggggccagggggccattccct  
tgactgtagtgagaagtttttactccagagaaatgaacaaaaagctgccgaattggcttatttctgctacatacaatggaagattttgagtagcaatgaatt  
tttgaatgaattgaatgaagaagattggaagaagaaagtttctcaacacagggaaaaggtccctcgaattgattatgtaagttggatagatggcgtaat  
atttctcatttctatccgaaaggacttttctatttctattccactccatctagatcaagaaagcaatgcaatgaaatctactagtagaagaaagaggaata  
gatacaaggtctcaaacctgttatagaattttcttcaagaaaaagaaatcatatagatcagcgaataaagcggattcattacaactcaatttacagatcaaaa  
atgaaaaaaagaaagcattgcttcttctatattctgtattatctgacttttgccttggggagctcttctttaaacaatgcttgaacttggattaaagaattggtg  
gaataccaggcaatcccaactcttactgctattcaagagaaaaggttctagaagattcagaaatgaagacccttttcttggacgaaatgataaaagag  
aaaccgaatacacatgtacaaaacccctataggaatcgaaggaataatacaattgcccacaatagataatgagggtcatccatatttgcatttctcga  
caataataatctgttggctatttaagtggtctttttctggtaaaagaggaaactgtattttgaaattcttgggtcaggaattcttataactaaatgactcagtaaaa



gcttttttattcttttagtactgattttttgtggatttactccaccgcggttgggaactactaatcgttgggtctataacgatcttggatgggttctaacgagctaatt  
tactattttgttfgatgttctgtgattctagatacatgtttaaattttgggtctttttgttaaaccgctatctctcgtttagtattatcattcaattagtgaag  
cataaactcattgatctctgatattaatcaaaatgacatccttttctttagaagaaagccttttccattttagcaaaaattctttttctattctacctgctcaaggatt  
catcattccagtacaactgttgcagtagaatgacaacagattcgtgtatagggaactagattagcttagctacatctaatattttagaanaattccgggatctgattg  
gacatggaaaaatagaatacttttcttgggtaagggaacagatgactgacgattctgtatcgcacatgatatacgaataactggacatctattcaaatgcatac  
ccattttcgcgcaaggttatgaaaccacgagaagcaactggacgaattgtatgtccaattgccatttagcgaataagcctgtggaattgaaagtcccaag  
cagtgtctcccatactgtattgaaagcagttctgaattccttatgatatgcaactgaaacaagttctgctaattgggaaaaaggagggtggaattgtgggtgctgtc  
ttattttcccagggttgaattagcgcgcccgcactgatttctctgagttgaaagaaaagataggaaatctcttttcagagttatctcccaataaaaaaat  
attctgtgatagccctgttcccggtaagaaatagtgaaatcgttttccattctttcccgcacctgctatgaagaagacgttatttcttaaaatccccatata  
tgtggggggaaccgaggaaggggacagatctatcctgatgtagcaagagtaacaatcggctataatgcaacgtcaacaggtgtagtaaaaaactgctg  
taaagaaaagggggatagtaaatatcatagctgatgacggaagcgaaggtgattgatcttaccctccggctcagaaacttctgttccagagggggaatc  
gatcaagctgatacaaccattaacaagtaatcctaatgtgggaggggttggctcaggggatgacagaataggtctcaggaatcattaccgctcaagcctttgtt  
ttcttgcacgttattttggcacaagtttttggctcaaaaagaacgattgaaaagggtcaattgtacgaatgaattcttagtcccgggattcttaccatcaag  
ttgtaaaaagccgcatattgtgagattgctagaattctatgatcattttgaaatctttttgttagactattttgttgcgagatgctgtctgaattcctatt  
tctatctcatgcaaacgagggaagcaaggaagggcgagaacaataaaaggaacaactcttttaggagggattgctgtcttcaatcctattgggca  
caagaaaaaggccttttcttctgtgctgattcttctgtattgtatcgaatatgaatcttttcttcttcttcttcttcttcttcttcttcttcttcttctt  
ttgaaccttttcttaggtcagggcagtagtagggacaaaagagggaagaaatagggcggggacaaaattttgtaccaaaatagaaattgcttgaattgtca  
attacttaaatgaatcaatgatttacaagagactctccggggaataaataattggatcctcgaattgatccttcttctcctcgttccataaaaggtgaatattctt  
gaggggggtataaataactgatggacttactaactaactaactaactaactaactaactaactaactaactaactaactaactaactaactaactaactaact  
gctttcttcttcttcttcttcttcttcttcttcttcttcttcttcttcttcttcttcttcttcttcttcttcttcttcttcttcttcttcttcttctt  
aatcagataaaaaggggtaagaccgctaaagtcttattttctgatttacaactggtccctcctcaatctatagatgaaccaatccagaatgaaccgtaaa  
agaaaacacctataaacaactcacagcaataccggttacagctacatcagccaaagaggaaattcttccagtagtaccgaccttcccacttctccacatttat  
caagtggctatgctagacaaaacagtcagtagatgataaggtatcttccaaatgggataagagaattcttactactcttcttcttcttcttcttcttctt  
agtaattggaaaataaacagcaagtaaaaaatgagtaataaaccagctagactggtacgattcaatcaactttgttcttcttcttcttcttcttcttctt  
atagttggaattgtttatctgtgtagaactgactgctgatattgatccaaagaaaaaacagtaggtacagctagctcgtgaacagccagccatcgcactgtaa  
aatagtaggttcgatctatgctcattgagggcctctaaagatctactaaatcagctgattgttctaaagaatcaaacggctggttattaacggaattcctgtc  
ggcttctgtgaaatactgtttggcagagactcacaacacgacataagctaaaccgactgacaaataaccaccgcaatgaatagggaaggtatagatag  
ctatgaataaccagctatgaatactggaataatcagcaaaaagagcttctccgctcctcagacatgctgagctccccaaattttgtaccataaaaaaggaat  
tgattccgtaaaagatggatcaaccagtaaatagaaaactgataattcactctgtgagattgcaattttgtaccaaaggtgattttgagataccaaatagata  
gctatccttctatggcagcaatcgtttcagacaaagcgaacagaattcttttcttcttcttcttcttcttcttcttcttcttcttcttcttcttctt  
atagaaaacctaattttgagggcttacttaattttaccggctcggaaatagtagaataatcggaaatagggtcctcaagatcttgggaaaatcaagtaatgatcaac  
aggttggataaagaatttagaaagatatttatactgacacaatacaaaagagaagtagatcgcaaaagctatccctcgaatccaacttccccttaaaagatttaa  
ttggttagcataataatcttaataaataaataaataaataaataaataaataaataaataaataaataaataaataaataaataaataaataaataaataa  
tgttactaacttctgacaaaactgcaagcgtggaacttccagttcttaggttccgaaatagtgtaaggaaaagaggtcttcaatcgaatcgaatcgaatcgaatc  
gaaaaaggaaataaaaaaagtaaatcaggaagatttcttttttaggagaccctcaggggctggtgaatgcttttcttcttcttcttcttcttcttcttct  
atataaataaagaaggaatagggaatctgactgttcgctcaaaaagaggttaaatcctcttattgaaaaagacaaaatagaagaacttttcaaatcaattct  
ttattttactggggttagctgatctgcttcaatattttacttactaattgacagattacagcaaatcttcttcttcttcttcttcttcttcttcttcttct  
atccattttcttactctgtatctactctatcttgttttttagtattatcaaaaataaccgatgaatgaatgaaatttccataacttaggtaaggtcttccaacatagtagt  
gtagtaaaaaaatggaatttaacccttctgcttactataactgatttcttcttcttcttcttcttcttcttcttcttcttcttcttcttcttcttcttctt  
gcttatttgaatgaattgaatgaataagcagaaaaaataaataaataaataaataaataaataaataaataaataaataaataaataaataaataaataa  
ctttagcgggatttctgactgcttatttgaatacagacgtgggagcagttggaatctttagtagtaaatatttctttttgattgcccctcctctctgctctggaggag  
gtcaaatgggaattgcaattgtttgttaagttattttccctgctcagataagatagatggaatcacgctctgtaggattgaaactcagacatcgggtttggagac  
ccgcttctaccgaactgaactaagagcgtttcaaaaatcaaatccttttactcctaatgtgtctcagctacgtatagtagtaccacaataaagttataccgctttaa  
tcgacctctactactgctataaagaagaagaagtaatagtaggagatgacaggattgaaactgacattttgtaccaaaacaacgcgctaccaagctgc  
gctacatccctttcaaatgttgaatgcttctgacacattctatcttcttccacatcctaatcttcttcttcttcttcttcttcttcttcttcttcttctt  
ttggtctcatataatcaaggatgtagatataatcaatcaatcaatcaatcaatcaatcaatcaatcaatcaatcaatcaatcaatcaatcaatcaatcaat  
gttcggaatttccgcaaaaagaatacaaatgatcttgggcaataatctgatcatatacgtattccaataaggaaggagatttcaatcgggatataaaaa  
catatctctgtgacaccgctgcaagtagctctatggtttgggctttagcaggttattgatagaaatcaatggttattccagatgcttcttcttcttcttctt  
agttgtgctatgtaggaatagagttctctgacatgataaaaaatcccactttcaatccttttttagtataggaaaagaaaaagaaagataattgggtgg  
acctagagctatgaaaaatttgaatctcttatttgaaaaaagaatcaatcaatcaatcaatcaatcaatcaatcaatcaatcaatcaatcaatcaatcaat  
gctgggttggctactaaaatgaaggatttcttcaaaatccttcaatgtgacaaggattgattccttaattatttcttatttttacttaattgaaaaatccaaaa  
atttttacttaattgatttcttcttcttcttcttcttcttcttcttcttcttcttcttcttcttcttcttcttcttcttcttcttcttcttcttcttctt  
caaggggaaagatgtagaatacagatttttcaatgtgtgagttgttctgaaaagggccaataggagctggcggggttcttagatagtagtcaaaaaga  
atcgcacaataaccggacaatagaataaagaattttgtcttattgtcgtaaagcagctacgattcctccgaaataaagaataggagcatctgttctgacttt

ccaaagatcaaaaaaagaataagaactctatftaatatagagcatagatagaatacaaaaatacaaatcaactgtctgatttccattagatatttcatatgtatcgag  
ggtattcatctaataatgaccaaaagagagactatftcttctggatccaaaataaaaaaatacaaatcaatftttcaatfttaaaataaggaaataatcatgtataca  
tctaaacaacctttcataatccaacaaactttcataatccaagcaactttctgtaaatcaagcaactttctgtaaatcaacaacctttctgcaaacccaac  
aacctttctgtagcgtctcggattggcccggggatcgaattgattatagaacatgagtttaattatcgaattattatggaacaaaggaaaataattatcgagacga  
ataaatagattaacctgaaacaacaacgattaattactctgtatataaacaggctcgaatttatcttctaccattcgaactatgagaatgagaacaattcaagc  
ccagtcaattcaataattacaggtcctagaccagaaaaatagacatattcctcattaacacaaaagttcaattccaatcgaacttaagaactccaaccagact  
taagaacaacaatcggaaacttaagtccgattgtgatgttttattcgaaggccagactatataaaagaaataatccaatttagattctgggtttgtataagaaa  
gaacaatggggaagaaaaatagtttttatttattgcaacatgctcgttgattcctaccacttaatttattgattctcccggagttacctcccggaaftctttt  
taattattctgtatattactttttatcccttaattgataatctttatttttggaaatcgtgtaagattattggatttaatacagctactgtgcaaggattttacgattaaga  
atcaattctttctgtaagattgtgtattaattactataattatcgaactttatgtatccgcgttctgctgtttatccgactgatccacaacgccgaaaatccctctttg  
cctgactctatctgatgagaggaaacaacgctcttcttactgttgagtaatcattcgaattagcttaaatgagcccctcaaaagttgagcgaatgaacgcaatttt  
gcccgtcgtctccgatgataatcctcgcggaaactctggtcattgaaatcaatcaacttaataaataatgatttcttcttttagccatcttttccattaataac  
aaaacgaattattccataataaaatattggtccaatggctttgtactataaccttccaaccacaattttcttctactccttcagttattcgcacgatactaaaaa  
atagtggttccatcgtttctatgttcccttttaaacggcgaggccctctctatacaccggagccctttcttcttctcaaaagggtattgtgaactgtatagttcacat  
tctttggctctacatccattatagatgaatagctctttcacaataagattatccatacagtgacggcatttaattatgaaagttggctaaagtagctgacctcttagt  
ccgttttttaagataaaggagcagataagcctttatcttttactattctcctccttaaatgaaatagccgtttgtctaccaatgggggaattgtcttatttccaatcagatg  
attgattgacccaaggaaaccagaatccatataccgtagaatctagatagagaagctctatcttacttaccattggtagccatcgaacttcaaaaattgtctt  
atftgtttgaacctatccgaacgagtcgcacatacaccctagcacatgttctcgcagctgaggacatccctaaagcggcggattttctagcattcgtattg  
ctgtcttgcgtttctaataagttgtaaacctgtgcatgtatgataatagaaaaaatggattggtttagatcgaatcctaacctgaatgattgacattatgaaatftcc  
ataaattgcataaaaccgaafttgggttgaataaatttacaagaatctggccactaccaatccttaaacatttctggaaccacactggatcagatcgcagtg  
tcgtcaagcatttcatcccataaatcgaacgtccataagctttggctctctgctgacataaaaacatcccttccatgctctcgatacaacccaaaaaggcttg  
cctgttcttagtcataaaccttctgatcattctcgaactttgttaactcttccactctagtaaaaattctggttcttcccgcataaagcactagcaggttgg  
aagcataatcctcgcgtggggaatgctafacgttgggttctcctccaagcagaatgaaggacgccatggacgcggctattccgagcattgtatataat  
ctggtgtcaccgtttgcatcgtatacaaaaatcgcattcctgagattaaccaccgccgggggagttataaacaataaaataatcgtacttccatcttctactgaga  
tataccatgagacctgtaatatgattcgtacctcgaacgaatccttgacttaaaaaagtgcttctcgtacataacattgataaagcacaacccaagtcgcttct  
catctccgggaatccgtaaggacttttgaacaccaatggcattatgattaatatttaaaatgaagaaactacactttaatgaaacgtaagaatgg  
aagagaaaagaaatccgcatttattgtttcactttttcttattctatgataactatagattctattaatacgtagattgaaataatacatagattgaaagattataca  
tataagtagataagacagattgataaaagaaaaaatgggtgattcgaactaaacaaaagagataggatctattctcgtttttccaaataagccaagctg  
cccattgcatattgacattatcagatataagaatagatctgcttcttctctacgaacagaattggcttcttatttttaaggaatgaaataaattcaccgttctgac  
acagaatccctagaagggttaggtacatagatagatagatagcttcccaatgcgataaaataaagtgacatcgtgtctattttcttgcataaagggttattccatgg  
gtttgccttggatcgtgttactatgctgattgaaatgatccgggtcgtattgcttccggtgcatataatgcacacagctctagtttctggtggcgtgctgatggctta  
tacgaattagcgtttttgatccctctgatcctgtctgatccaatgtggagacaaggtatgtcgtatccttctcatgactcgttaggaataaccaattcgtgggtg  
gttggagtattcaggaggaactgaacgaatccgggtattggagttatgaaggcgtggcaggggcgcatattgttttctggcttgtttctggcagctatctgg  
cattgggtatattgggacctcgaatattctgtgatgagcggacgggaaaccttcttggatttcccgaatcttggaaattcattttctgacgggttggcttctg  
ttggcttggcatttcatgtaacgggttgtatgtctggataggggtctgatcctatggactaactggaagaatcagaactgtaaatccggcgtggggtgc  
agaaggtttgatccctttgttccgggggaatagcttctcatatattgctcgggtacattgggcatatagcgggctattccatcttagtctccgtccacctcaacg  
tctatacaaaaggattacgtatggcaatattgaaactgtacttccagtagatcgtcgtctgttttttgcagcttctgtagtccggaaactatggtatgggtcagcaa  
ctacccaattgaattgtttggcctactcgttatcagtgatggatcagggatacttccagcaagaatatacgaaggttagttagtgggttagccgaaaatcagttat  
cagaagcttggctaaaattcccgaataatgacctttatgattatattgtaataatccggcaaaagggggattattcagacaggtcaatggacaatggggatg  
gaatagctgttggatggttagacatcctatttagagataaagaaggcgcgaactttttgtacgccgtatgcttactttttgaaacatttccggtgtttttagatg  
gaagagggaattgtgagagcggacgttcttttagaagagcagaatccaaatagtggttgaacaagtaggcgtaacgggtggagttctatggtggcgaactaatg  
gagtaagttattctgactcgtactgttaaaaaatagcgggcttcccaattaggggaaatftttgaattagatcgggctactttgaaatcagatggtgttttgcag  
cagtccaagggttgggttacttttggctcatgctacttttgccttctttttggacacatttggcatgggctagAACCTTgtccgagatgttttctggtattgat  
ccagactggatgctcaagtggaatttgaacattcAAAAAGtcggagatccaactacgagagacagccagtctgaggccgcaattgctttgtatcttccctct  
ctttttgattgacatgggaacatcctccatcccttcttactcttttctttttatagggaaatgatccaaatgacaaatgaataggtgtggaagtataattgtaa  
ataaacaccgatcgaatctatggaagcattgtttatagcttcttttagttcacttttagggataatttttctgctatcttctccgagaaccactaaggttccgactaa  
aaaagtgaataatttaattgaagtaagaagtctccccatctgggagacttctactcaattagtccccgttcttctgaaatggatctttaaattgtgagagggttccc  
aaacgcggtatataaggcattaccagtaaaagcttacaagtaaacagatagggatggcactaaagtctgtttccattttatagaattcaagattacaatggat  
ctacgaaaagatcgtgtatttacaactacaacggaatagtatacaaaagtaacacaaatcattaaatggaatttagctacacaacggtgaagatagttctagacct  
ggaccaagacaactcgcgtagtaatttattgaaaccttgaattcggaaatagggaaagtagctccgggttgggggactactcctttatgggggtcgaatggct  
ttattcgggtattctctattatttttagaaattataattcttccgtttactggacggaatttttgaatttagtttactaacgaaaactacgaagatagttttccat  
ccaaaagaccttctactttaagctctacattctagacattctgtagtctgaccgtggaatttttggtttggatctctggaatagatggtgtgacttgtagaattg  
ctcctattgataatacatagaaagcactgttatctctatcaagatattctaatctcgtcggatattttattctagatctggaacacgaaatagataggtggaatcaaga  
aaaaaaatgaaactatgattcatattaactattcagacctcgaaccagactgaaaaaattcaagtagtcttaataaaaaataaaaaaagaaatftctcctcaatt  
ttgttcccaaaaaacaactttttctctcgtttttgctgagtcattacaccgattcaataatgatcaaacgggttcttattcgaagaaccttgcctttttagcttg  
agactcaatcctggtgcttagtgaactaaagtttaattgaaactgattcatagatcgaacaagataatttaccagaaactactcaatttttctttattttt

atctagtaaaacaagagtaaatctgacattacgcacaaaaaaagaatccaaaatagggagagaaaaatcaagaggcctctaataatgatcaacatttgggaaagaaa  
gatagacgagccaacttgagatttttggcattatcatcacaagaagaattatgatttttctatttcatacttcaaggcaaatcgaccaaccagtgctgatga  
agtttgaaccttttctaataaccggtgaaaatttgggtttctgtttgagccgtacgagatgaaattctcatatacggttctcggaggggggttcgggttagtacctat  
ctcaataaagtatatgattggttgaggaactgctgacgcaattgcagatgataactagtaaatgctctcctcatgcaacataattttattgtaggggg  
aattacacttactgtttctagacaagtgtaccgggtttgctatgacttttactatgcccaaccgttacagaggcttttctcggttcaatacataatgaccgaggc  
caacttgggtgtaaatccgatcagttcatcgatggtcagcaagatgatggttcaatgatgatcctgcacgtatttcgtgtatctcacagggtgggttaaaaaacc  
cgcgaattaacttgggtcactggtgtggttttagctgtattaactgcatcgtttggtgtaactgggtattctttaccttgggatcaaatgggtattggcagtcaaaattgtg  
acaggtgtgctgacgcgattccgtaataggatcaccttagtgaggtattacgtggaagtgc tagtgggtcaatccactttgactcgttttatagtttacatacct  
ttgacttctctgcttactgccgtatttatgtaatgcactttctaataatgataagcaaggtatttgggccccttataagggaaggcactctcatagagagttcattctc  
atatacatatcgggtaggtgtggtatttctgtacaaacatgggtatttctaaaataagacatgctatttagatacttcttcaactcggactattgtgatacaata  
atacaaatagttgaagtaattttacgaaagaaagagggcggattatgggaggtgctgcaacttgaattattgattggccatgcagatagagagttggatctgccacat  
tagaattcacgaccaaggtgctcctcatatcaatcaacacgtaagtccttctgtatgagataggtcgtttcacttgaggagaatttttctatgatcacacctcaa  
ccatgtcatccatgaagaggctccgtaagatcccatagatagaatggaataatgcatgtgacatgatccaattctctatttattacacttacttttattatagatggaa  
atgcatcattttcttgcacgattgcatctgcaactatcggagtaaaagaaggatctaaagaaacgtaggctaaacttttgatttttattagtaacaagtaaa  
tactttgttggagtaagaaactgcaatattgggggggataaataccaactaatcaagagacgcgagacaatccaaaagcaattgatcatgcaaatgtgaag  
cccacttggatattgacatftaccataagagtaggattcttcaatgaatggttaggtgcaacttcgaaaatagaactgataaagcttttctacttagagccatt  
gagccattatatacttattctattatggtatctctacggtttattttcttcttctgctcgaaccggatgatgaaaaattctcatgcccggcttcttgggggctgcatc  
aagaattacccttccaataaacaagaacctgacttaaacgactcgtatgaagcgaatgtagggttagcgggtctcgaaccgtcaatgattggggaaccggcgtg  
gcccacagacttttataatfttccagtagtaattctaggtactattgcaatgtagggttagcgggtctcgaaccgtcaatgattggggaaccggcggatccgtt  
caactcctcggaaatattaccggagtgacttcttccggtttcaaatctcgtacagtagcctaataaagttattgggcttctcttaaggttctgtgcccagcggg  
cttattgacagtacctttctagagaatgcaataaattccaataaccattctcgcgccagtagctacaaccgttttttaactggtagctcctttggttaggtat  
tggagcaacattaccatgaaaaatccttaacttttaggtcttttttaggattttcagtttattcattcaatcgtgaagtaccgtgcataggtatctaggaaatagttact  
ccaagtgaacttccctagatacctataatctattttattatgatccattcgcgaaaatagattgcccacaagatgcaaaattgtttcttttttatttcaactcga  
aagaagagagaaaaaattgcaatggatttaaaactagaacttattcttaggtaaatccattgggagatgcttctctagagtgccatctgttttccatctgcatc  
gaaaactgcaattctcatgacttctcctgcttactcaaaaggtccaatagtgatggatattggccctttgagacaattatacgttctagaaggcagttctaatga  
tcaataaaaaatacaatcaatggaattctttttggtttcttagaattgtaattcttttgaagcttaaaaggggggagtaaacctgttttatttcttggaaacgagta  
ccctctctccgtgtgagaaaaggaagaataaatcaatcaaatcagagaagcctcataaagcgttcttaggggttaacttcattggtccatattctagaaa  
aagatctcatatttgcatttccatccacagcaaaaatactataatcacaattcgaacaggcatgatacagcatctataggataactccatcttgaggttcttct  
gacttccgtgtgataccgcgatctcttctgatccgtaactcaatcggaaatccgtgggttctgcaagtagctataggtgtgccgatcaacgatttctacggaag  
gcgtaagataatcttgggcagttatgatctagacctttgacgcaatgatgctggttcaactccatagagattacttctcaatacaatttctcaaatattagtaaa  
atttctgtaccgatttcaatctgctattttagaataatcgtcggcgcgctcccaatttgcattgtgatacatgttcttctgtttctccaagtaagctctcga  
aggcaatccaacggatccgtgacttttcaagcgggacagaaatgaaacgaccataataaagacgcttactatctacttctgattcaacacacttccactgtag  
gtttgagtgatcctgctacctctcgaaccatataagactagattatttattgatcattgaatcgtttatttcttgaagggggttaattctttacagacgtctttttta  
ggaggtcgaacccattatcgggcataggtgttaccatcgcgtatacaacttaategtacaccacttttagcaatggcctgtaatgcggcatctctccactaccagcac  
cctttaccataacttctgctgttgcgaaccactgtacgaatagcatctacagctgttctttagccagcataggggtgatgcttttctgagcttttgaatccacaagtacc  
cgcggaggaccagaaaaccaccgaccttgcggatctgtaacagttataatagattgttgaactagcttgaacatgaataactcctttgtattctactgctcactctt  
ccgtaaaactaaaacgcgacttctacgaaaccaatcgtacttctctacgtgaaccaattttgtagatctttgcatattttattatctcataaataatgagttagaata  
acaaaaagaaaaagatacaagataccgtttcagggttaaaatatacttacttgaatttttttgaatttggacatttccggtgacttttttttacttttttaga  
aagtaagttctttttgaaaattaccctgtctttgtttatgcttcggattggaacaaatgacttaattcgtccacgctacgaatcagtcgacatttgcataaattta  
cgaacagaagcttattttcattttccgtattcttcttaaaactgaatttactttttgaaaaaataagcttcttgtttgaattttagaactttgaattttaccctagaa  
aaaaaaagaaaaacctaacccttgaatcttggatcttcaaatcttcggtatcttcgagcttcggtacgcttcgaatccttatggggaagctataaattatagcc  
ccttgcctgaatcataacgacttacttcaattttgaccctatccccatcagattctgtagaactgaccggatcttctgaaatagaccaggtgatggtgtcatt  
ctctagcgaacgcggaacattccgttgggtgggcttccataactaaaccctcgaagtaattttgcttctcgggttttttttctcctcatttttcttctgcatatt  
tttttctctatttttcttttttttcaataaaaaaacgttatttttggtaaaataggaagtcaagatagaatttgggtactataactataggtggggcattaccg  
ctatagcggggcgtattaccatataacataaagacttctcccccaattctgtttatgctgagcttctgatctgctattatacctcgaagtagaagaatagcaattcc  
cattccgccccaaaccttaggaattcctgatagttggcataaattcgaagccaggtcggctgatacgtttaaaaagggttctatgttctatataatccctttctagtcttct  
ctttgtatgctgcaaaagtgaaccaagaataatctgttacttctctgatgttccgaacacttcaataaaaccctctcgtagaagtatttaacaatgttttggtaaatatt  
gtagatactaccgaaacagttctttttattcatgtccggttctttagaggttagtaaatcagcaataggtccttgcataaagactcaattctaggttctcctaatt  
ttctataatcaacatgttctcttttttcttctgtttgattctaaagcatacgtgaaacacaatctactaattttttttagctatatacttctactagatttataactc  
aggagctaatgaaactatttagtaaaatcaattctcctaattcctcggcgtacgcgcaaaaaacgcgagttccttttgatttctttttagcaatgataaccgtgcat  
tctgtcatagcgtatfataaccgtctcgaatttgaacttctacatgtagcaatfacagctcgaattacttccggatcttctagaggcatttggggcactgcgtctt  
tattacagcaacaataacatccaatacagcagatcgtgattactagcagctctatgactcgaatacacatcaatttccgagctccactgtatctgctacattta  
aaagggtctgaggttgaatcatatttttgaattcaatttgtatttcaatgcaaaaggatgaaagaaatattgtcttccagaagaagaacctggttttttttcaatac  
tacttttttgggggttatttttaaccgaagaaattgacttctgtagggcatttctgctgcaagctatggaatagctactctagctacagtttggatactccgccat  
ttcataaagtattcgactgtttaaacaacggctaccaatattcgggggatcccttccggaaccatagctttcggtcgggtctattgtaaccgggttctgctgggaaa  
tatactgaccagattttccaccacgactgcatatcgtgcttctcgtcttctctctcgtcttctctcgtccgtaatccaagtggttcaaggtcttgaagagcatat

cfacaaaaaacaatacaatgctcggtaggatttccctcattctctctatgttgttacgaaatctggtcttttggggtatagtcgatggtctctcttagttccatc  
ctactgcaaaactggacatgagagttctctatccagctcctcgcgaatcaaatgagaaagtgtgcaaatctctaatccacaatattctaaaattaccggataga  
tacacattaatggaaggttagggtttaataattgaattatataaataactaaaatataagcaagaagaggatctagaatatactagatgtgatgtttatctat  
attctataatgaatcatttttttttaactccttttttactctattgaatcgcggtaaagtattcaatcaaaaaattcgcggcgaatattactcttct  
gtctattgttaattcataacctatcaataagacaatttttggttgtccgccatcccacaaatgaagtattgggattcttcaagaaaatctatccagtcatagg  
tctgtcgtcccactgctctccttfaatggttaggttgaaatcgcgaatgagctccaaaaaattcttccgagtcattctcagtttataactcgggacgctctgt  
tattccttgaattgtattctgttcaatcaaatfacgattcgaattctctgtatttttattatattgatgctttatcacattgctttttatgatgaattcatagaccatacat  
tggaaactctatcttcttattctctccttcttctatcctctccttctatcctctccttctatcaccctttagtttggcttcacaacttagaatcctattttttaaagaaaaaattgcagt  
tgctacacgtatgatagatttactcattatgatagatgtatttattcatatagtgactgttcttagttaggatctcgacaatcgaagcaataggttggttattagttcatt  
ttctataatcatagtagggttcatttatttttttaaccccttttgaaccctaaaaaaaactaacgagtcacacactaagcatagcaattttatataaagatttctcaa  
tttctataatcttatagaagaggtagaatttcttcttttccagggttttagggaaaaaaggctctgtcatttttattctattactgaacagaatgggaagacagg  
ttggttattctctctacgaatcctcaatttactcctaatactccatagatgctgaattggatagcagcaataatcaatttagcgcgaattgttggagggggaag  
ctacctttttgatgattcggcagcgcgaatttcttcccgagacggcctgcaattttactttactccttatactgttttttagtaattcaatggctttttcattgc  
ctttcggaaatgaaactctatttttaattggaagctataattctgcaagaatgttaggtgtctataaggcttttacttttccatcccaatataagctctggttacaga  
atcaactctttttagatcttctcaattctcattgctccttttttaataaattggggaatcaatggattatgacgtggattgtatcgatttcttttgaattctata  
tgttaattactcggaaactgagcctgagctcattttttattatgttaattctcgaactgagctcttattttcttctgaaccttttcttattctttttagatatagt  
tcttgatacaatccgtattttttatctcctgtgacctcagaataatttttgggtgtcgaacaaaagggaatgggtatttgggtgttaccagctgaaccaagt  
gattttttttgtccatattttctattttttaccgggaatcaatctagaatgactcaagattatctgatttcttactatattagcaattgttatgacacat  
ggttttttatgggagaactacgctcagcccaggctcgaattttactataatagctactcctactgactcggctttagatgaataaatttctttgtcgaatccct  
ataatgagtagcattgctcctcgaataaaccactttaagatgggataagatgctcgataaggcatgaggttcaatatcataacagtttctctagtaaacgcaa  
cgaatctatccagaactcttcttcttcttctctaggggtatacttaccagtttgaactgtcataataagggttattccccgcttaccctattcttttttttatttgaatcttc  
gttctttagcccactcttcttcttcttctctaggggtatacttaccagtttgaactgtcataataagggttattccccgcttaccctattcttttttttatttgaatcttc  
tattctgaattcagtaacgacgagatttagtattcttctgactttcataactgtgaaatgccgagttggtacgaattcccccaatttgcgacctaccatagatttgtt  
atgtaaataggatatttcttccattatgaatcgcgattgatgccaaccattcgggtagaatgctagatgcccgggaccacgttactattgttcttctctcct  
catattgaccttttctattttgccaataatgatgactacaaaaggattctttttctgctcacagctgattactccttttttccattttaaagagtgccattc  
aatatctgacgaagatggaggtcagaataatagaataatgatgaatgaaaaagagaaaaatcttagctggataaggggcggatgtagccaagtggatca  
aggcagtgattgtgaatccaccatcgcgggttcaattcccgtcgtccatccattattgcaaatccaaaatgcaatttccatattctagttacgtattact  
acggcgacgaagataaaactatcactatatttttcttcttagtcttctccaagcgcaggataacccaagggtgtggttttttctaccaatgggggcttcc  
ccttaccgccccatgggggtggtccacagggtcataactaccctcttactcaggggcttactagccaacttagaccggcttacccaacttttttgg  
tcccccaactaccactgtcctgactgttctaagcagtttgggatacaaacggactccccagatgtaactttaaagggtccgatttaccctttttgcaatca  
gttctgctacagcactgctccttagctaattgccacccttccacgtgtgattctatgttatgtagccgtgctaaaggcataatcgggtgaagtagattcttctt  
ctctcaaaaaacccttcccaactgtacaagcttcttcaaacgcatcggcttctagatgatatgacgatcttagacagatggatcttatgaatcgtatgatgaa  
gtaccacatgagtgatataagaaaggaaatcctgccaatcgtcgaatcgtatgtattctacatcctaggtctccgcttccgctcattgcttattcttcat  
gtgacattcagatcgaatgactctatgaaattacgctgatacttctacatattatgggtaacgtagggagacatccctattttccccggggcttcaattaccactgctta  
gcttcaattcgcctctgacctcaaaftaaatgtgaataaccgtcctctctcttgaacaaggggcgttccggttctgtcgtgcttcaacaatttcttctcca  
tattaccatctctagatcaataatttctatgaggaactgaactcaatcactgctgcccgttactcaacagtttctgttgaggtctatcccgtagaggtagcaaaa  
ttggatcagtgatcatttctagtttctgctgtaaacctaattgttactccaattacgtaaatcaatggttcaaccgactcaaaagtagggcatttccattgatata  
ggaactttgtaccagaacaatagatctccaattatagcccctctgggatgaaataatcttctcaccatcccatagtgatgacaaaatgtacgatttccga  
ttagggctgattctatgttactgattctaccagatagctttttgattcgtcgaatcgaatttctggtatagggcgtttagacctccccctatgcttgcggtaag  
attcctctggaattacgactttaccacaacgggtccatggatcaaatattctgtgattggaattcactgcttctatgttcccttgcgtgtcctcgggatg  
gtgtttgtataaattgttccgtattttaaagattctcctttagtttttctatcagaagtggaatgaataaaccgggtgaagggtaatgatcacaatgctgtaatgc  
attgtatgctagaatagggccacttctacccttccgggtagtcgagctattcactacactaacccaagaagagttcgaaccaatgctttatttctg  
tcttagtgaatcccgatcgaatataaagatattgattcttcccaataaacgaagacttttctgaaataactcgtatttgattccatccataaacgacttccccctca  
tgctctgagttccagatcgaataaattcagttcttattgttcttattgttattggtatgataatataccataccaattcgttatgtatggatgatgagattccatggatag  
agagccagttcaatagactttatgaaactcgggtcgcgtgcatccagcagaattgaaccgcaaaattaccaattatgattgggctttaaaccattcagccat  
ggatgcttaacaggatcctctgacatcgtataaataaccatttctatagaaagacatcatagaaaaatgaaatcgaataatcggagatggcaaatattcggag  
atgactatgaaaacacctctctgacatcgaattgaagagagattgagaggatccagaatcctaaattctcgtatttggaaatggatccaattctattgactgact  
catagtgatatttctttagcaagaatgacctgtttatcaaaaggattgaacaaccgggatccgttactatgatacctgattgacattgatacaaggatctaatga  
attatgatttaatagatcctttagcagaagacgtatattcctgctcactatttccaaacctgtaggggctaatcgtttcattaccatcagggaaaaatcc  
tttctgtccgttagccctatcgggtattttagtaggttctataggaaactggacgatcctatttgcgaataacctaataaaaaatctatttcttcaataggtag  
gagggtcttattccacaagaaaagacgaaagcacttttcttctatatactgggggttttacttggaaaaagacaatgtccatactaaaggattcgggtccat  
aaccacgagttccagtgcactagatctttagcacttagcaacgagccctatgaatagacatatagaattttgtcgggaaatcgaatgaatcattgagtgaaaa  
ggagcaagaatgacaaaaagacgagactctactagcttctcctctgtgttctcctcgggttcttatttcttccggatcttcttctatggttctcctctcgaactc  
cgatttctcggagagaaccaaatcaagtgtggaagatcatgattgggctgcatagtagtgattaccttgcgaattcgggtcgaatctatccgatcttatttctg  
ctcaaaagcaataaaacccttctcgaagcccttattgataagcttccctggatcgggaaatttcttctcaggtattggatcgttctgacttcttctgactc  
acttattggcgctcgaaggatacaaacagggttcgcaacaacaaagggaattctgtagtcaacttttctctcgtcgtaaaaaaaaggcttaccgcgagagc

aatagaggttgggatacatctatcctcttgagcaacctctttggattcttaagaccacccttcagfaggataccgtctgctttgggctttfattatattatctcctcga  
gggatttttaggacgttcagcgtatattttagctattttggctttactgtctctttctcagggaagtggtaaggacctcagaagatagaggagagcggccagcga  
gatttccggaacttctacggggaatgctcattgaatgcgcaattcctcgtattatgcttgaaggaggactcgaacctccacgtcttttagcacgagattttgagctcg  
cgtgctaccatttaccatcaaggcaatcttgaagtgaatcatattccatgaatatgatatctctaatgtgatacttfgaaagtgaatcattccatgaatatgatatc  
atctaatgtgatatatggaatatacgaaaagggtggagcttggagatfttcgacgacggtcatataggcctgagtcagacatcaaatgcttcgatttcattatccg  
taggacaccttatatgtatcaaaaataaagatgtacaatcaatttctcgattcaatagaagcccaagagggtgcatatggtagcccaataaggatagatagat  
gtcaaaagcaggtctgattacacctatcctaatcctaaatagaatgtaaggacgtggggtttctatgtaacacagatcctatttccataggctcgaatgacctc  
ctcataaataagatgtgcacggctctgctccggatggaatgaactataatctgatgatcgagctgattccatgattataagtccattaccctagcggccattcccc  
ggcggaaacagatctactaattctttttaccagttgtaagagggatcttgaactaaagaaatagaccctagcagctaaaaaggggtatccctgagcaatgcaagaatg  
ggttcattgatattctctgtatagtagatgctacacatacagctataactcaatctgatggaatgttgaactttaaagggtatctctataatttcgcacataagggt  
attctgtttcttcaggctcatttaataactgactatttttagataatagtagatagaagaacgctcgaaggatcttgaaccaagaatataaggcctgtttgcc  
atccacaccagaatagatagagtttccgaagaaactgctagtggaggaaggcctcctagggataagagacatagggtcaaaagagagcggcaaaaaggatct  
ttcgtgtataatcctgcataatctcgaatgttatcgttccgtacgtagacaaataatacaatgcaagcaaaagttcctagattcatggagatagaaaaacatata  
agttatcatgctgcataatcattgagctccaacaatfataaataatcatatccgattggccctatggacgaatatgcaagcagcgttctgatggtttgag  
aatagaagagattcccaatcatgctaaagaatgtaggatttccagaagaagatccattcgttgatgagaaaaaaaggaaatcgagaatcgcgtg  
ctgaaagtgaagcgaactttcgaagtaacagaagaaaaaacgactggaggtggggagtcagagtcgaaaagaggatccctcgttcttctcatgcaa  
aacctgcatgagatctcgcacggcctcaagtgataaagaaaagaaagactgttcttctttttgattacctctcgcgtatgataaagaccgaatccat  
cttttcgaaatcatttcgaaaaaaactactaactcctaaatcttgcaggaaactctcatagtggtgtgaatgactgatttccatcttccgacctggtcctag  
gagcaagtcagaaaaggttgaaaaatagaaccatctgatttgcctcaatgacatgactccttaggggtatccttttgcacaggtgctccctattaca  
ctgtagctctgaaggtagagaaccactatgtagctacgtcgataaactcaagcattgtatcgatttagtccgattctttgtaggaactaccgtaataacgag  
cttgcaaaatggatctgtttacataaagattcgttctctgacctgcttcacctaaattgtatttgaacaaaaagatcaataaaacttttgtaaaagtctgtctg  
gtcggagtgaggatagcatttctctgcataatctatggagttttgcaaaaacccaaacacctcagatagatagagggtaggaatttgcgaacgaaccacact  
cttcgtagacgcagagctcattgatgaaaaagggctggggaagcttgaaccaagctcacagtgatggatataagcgaattgaaactcgtgggaggtatatac  
atftgtgattgataagaccgttcacaatttctgaagctcgtatccccccagatgaacataagcagaagcaaccagatgaaccagaatagaagcgttcccca  
cccagtagtaaatfttcataatgtagcctcattgaccgtatctctctgtatatacagacaataggtaggaacataaactgaaactctgtgagctacaaaatag  
tattaaatcgttagcaccacataaaacactccccctagtagtctgttaatacgaataacgaaactctgttagccatttctgtacattcaatgtactctacggataga  
ggaatacataaaagttgaacataaaataaagaattgaaagatttgcgttaaatgttgcgtaaatcccgaagctaaatattagttctctccatgggaaca  
ataggccgttatgcttataactaacttgtgaaagatgaaatagaaccaaggtctatcttttgatcagagggttaaagatcagcagaagaagattgcccana  
ataggatatttgggaaatgaaactccctggaagagaagcaaatgaaacgcttcataaaaatctcgtagaatcagagaatgaagtttcatctgtacatgcc  
gatcatgaattagtaactgcatcaatctcggaaaagctccgattgttccgattttggaaatgggatattacggaatccccatgaataggaatcaaaccttattccatgcta  
ttccataaagattctcttttatttctaaagcaagccccgagaggcttattgtatcattttcttcttctttccttttgggttgcgaagagatctgcccgat  
tctcttctattgattctttccgatcagatgtatgatccatgtgctacatccagatttctgttccatgaatgcaaaatgtcgaagagcctatttgccctgcccattc  
tatgagctgcttcttttgcgtatggcaccaccccccttggcagcactataactggaactaaattgaaagccatatttgaccggagcgttttgggatgcttc  
taataaccaacgaaatggcaagtgccttcttctgttttagatcctatttcaatcggaacttccggctcgatectttttatcgtctgtttttactcctataattgggagttactct  
acgtattgctgacgtaaaaccaatagtgatttgtcttctgttttgaacttttcaacggctcgateagaaatttgataaagcaatgatttttccgtttcataatg  
ggftaacaccatgtaactaatcgaatgacgaaaaatggatcggatfttgcagttcttttctgcagfacctcgaactgacatgagcgtgaaaagggtcaagaatcc  
gttttctttataagggtcaaaaacgaatcatttttttggcttttaccataatttaggggtgatctcgaagataggaagatctccctcaagcgtacatac  
aacttctcgaatacggcttccacagaatctataggatctatgagacgagatggaattcagtttactactataaattgagatccgttccctcttctccgcta  
ggatcggaaatcctgatttccatcatcacaatcaagctcttagttccgaaatgtagaatgaaagaaagatgcttcgaatcattgctattgactcggacctggt  
ctgaaaaagtcgaggtatftcgaattgttggacacggacaagaatgggaaaaacccctgaaagaaattccatattgacctggacataagagttccgaaacgaa  
tctcttagaaaagatcttttctcgtatgacctcgcctccagctccctacgaactttcgtattggttagccatacacttccatctgattcagcattcacaatgcgatctc  
catcaaatgatacaagcttggaataaactcaacgcactagaacgccttgttgcacatttactcgcacagcagcagcagcagcagcaataaagcagatc  
acaccgggtaaatccitaacccctcctctccttaactacagatgtttctgaaattatggcaataccaggtatataagcagtgatttcaaatccagaggttaac  
gtactctggcaactttacgttaaggcagagttgggtttttgggttgatgtgaaaaagtcgacagataagtcaccctcctcctcctacagaaccgtacatgagatt  
ttaccctacacggctcctcgtcaattcttcaagggatcttttctcctgttcgagagctcctcccttctcactccgctcccgaagactaaactaagaccaattgagtc  
acgttttcatgttcaattgaaactttccatttatgataaaggagaagattgtcttttaccaaaatgagcagctttataagaagaatctttctc  
gtatcaatcccttgcctcattcttgaatcagaaggatcttttcgattcctctcttcttgaacttggcctctctctcacttatttttcttcttctt  
tatttatttcttctgatttttctctcctatccctatccctcctaggtacagcttgcataatagagaaccttctctctgatgatctatatttccattccatftctc  
cgaaactcccaagaaaaatcccgaatggatccaaaatgacgggtaattgagcttaccatgagggtaggcacttcaataaggaatccttttcaactggct  
tctgcttttggtagtcgacgatccctcctgatcatttctgtttgtaggataatgatactgatcagattgcataagaccggctgacataagaacggg  
gaaagtacagaaaaacagcttcttcaattcgaatttctatataattgcttcttattctagatactatttctatataatgatttagtagtagtattctattgta  
gcgatccggctctgtgagtttcttccgtgatgaactgtcggcaccagctcctcaattttctctgtggaccgaggaaggggtcagcaggaagagaggt  
taccatgagagaacagaggtcaaccccttcaaatatgaaatggaactggaactggaactggaactggaactggaactggaactggaactggaactggaactg  
agaggtcaatttgcctatttagcaagaggtatgcaagtcgaaactgtctcggtagacatttcttattctatgaaattcataaatgaaaatgaagtagttaa  
tggagggctaccattatcttttctgtatgttctcaagagaaggaatttgcacatttcatgttccgaggtcaaaaaaggcgtggaacagatagaactctg  
aatggaattgaaaagaaatgtagccccagttctcggaaatgtaagatcttggcgaagaagaaggcgaccatatactgactgttctgtctctccct

cttttttaagaatfaccgagtcgggttcttctaccagatcgaatagaacatgctgaacaagatcttctcatggaaacctgctcgatttagatcgggaaatcgtac  
agattttatgaaacctatgctatggctcgaatccatagtcattctatttctgataggaccggttgacaattgaatccaattttccattatttactatccataatagtg  
ggaagaaagcccggaggagggtgacctgagttctcggcccttggcttaggattcgttaattcttctcaggggacggggaaggatataactcagcggg  
agagtgacacctgacgtggggaagtcacagctgagcctgattatccctaaaccaatgtagtatttctatttactactccccccacgatcgaacggga  
atggataagaggcttgggattgacgtgatagggtaggggtgctatactgctggggcgaactccaggctaaataatcgaagcgtatgatacaagttatcctg  
gaaggaaagacaatccgaatccgcttctacgaataaggagctataagtaatgcaactatgaatctcatggagagttcgtcctggctcagatgaacgctgg  
cggcatgcttaacacatgcaagtcgaacgggaggtgtttccagtggcgaacgggtgagtaacgcgtaagaacctgcccctgggaggggaaacaactgg  
aaacgggtgctaataccctgtaggctgaggagcaaaaggagaaatccgccaaggaggggctcgcgctgattagctagttggtaggcaatagcttacaagg  
cgatgatcagtagctgtccgagaggatgacagccacactgggactgagacacggcccagactcctacgggagcagcagttgggaattttccgaatgggc  
gaaagcctgacggagcaatgccgctggagggtggaaggccacgggctgcaactcttttctcggagaagaacaatgacggtatctgaggaataagatcgg  
ctaactctgtccagcagccgctgtaagacagaggatgcaagcgttatccggaatgattgggctgaaagcgtctgtaggtgcttttcaagtcggcgtcaaatcc  
cagggctcaacctggacagcgggtgaaactaccaagctggagtaggggagagggaattccggtaggagcgggtaatgacattgagatcggaaaag  
aacaccaacggcgaagcactctgctgggcccacactgacactgagagacgaaagctaggggagcaaatgggattagagaccccagtagctcctagcgtaaa  
cgatggatactaggtgctgctgactgacccgtgcaatgctgtagtaacgcgttaagatccgctgggagtagcttgcgaagaatgaaactcaaggaatt  
gacggggcccgcacaagcgggtgagcatgtgttaatcgtatgcaaacggaagaacctaccaggccttgcacatcccttgaagagagggt  
ggcctcgggaacgcggacacaggtgctgcatgctgctgacgctgctcgaaggtgtgggtaagctcgaacgagcgaacctcgtgtttagttgccac  
tatgatttgaacctgaacagaccgcccgtgttaagccggaggagggagagatgagccaagtcacatgcccttaccctggcgacacacgtgctac  
aatggcgggacaaaggctcgcgatcgcgaggggtgagctaaccaaaacccctcctcaggttcgattgagcctgcaactcggcctgcaatgaaagcaggat  
cgctagtaatcgggctcagacacaggggtgcaatccgttcccgttctacacacccggcgtcactatagggagctgttgaagctaacctta  
accgtaaggagggggatgctaaggctaggcttgcactgaggtgaaagctgtaacaaggtagccgctactggaaggtgctgctgacacctctttcaggggag  
agctaagcttatgctatttgggtatttggttgacactgcttcacgccaanaaagaagcagctacgtctgagctaaacttggatggaagcttcttctggttaggt  
gaagtaagaccaagctcatgacttattatctaggtcgaacaaatgattgtagatgtagatcccttttggactccccatgccccccctgtgtgtggtg  
gcatggggatgcaaaaggaaaggatggagttttctcgttttggcgtagcagccctccttgggaggcccgcgacgggctattagctcagtgtagagc  
cgccccgataatgctcgttgcctgggctgtgagggctcagccacatggatagttcaatgtctcatcagcgcctgaccggaagatggatcatcaagg  
cacattagcatggctactcctcgtttgaaatcggagttgaaaccaaaactctcctcagggatagatggggcattcaggtgagatccatgtagatc  
actttctattcactgtgggatccggcggctccggggggcactacggctcctctctcagaaatccatacatccttcatcagttatggagagctatctcag  
cacaggtgaggtcgtcctcaatgggaaatgggacacctaacaacgcactctcacagaccaagaactacgagatcacccttcttctgggtgacggaggat  
cgtaccattcagccttttttcatgcttttcccggcgtctggagaagcagcaatcaataggacttccctaactcctcctgaaaggaagacgtaaatctttt  
cctttccgaggaccagggaggtgtagctagccataagaggaatgcttggataaataagccactcttggcttctgactcctaagtcactacgagcgcctc  
cagtgcaatgggatgtgctatttatctcttctgactcgaatgggagcagagcgttgaanaagatcttagatgtaggtgggagggcaggggctct  
aacgcttcttttctgccatcggagttatttccaagacttccatgtaagggggagaaggggagaagcactgaaagagcagctacaacggagaggt  
gtatgctgctcgggaaggtgaaatcgtcccgaagaggtctattgattctcctcaatggttggatcgtaggggcgtatgatttctacggcgaggctct  
ggttaagtcaggatggcccagctgcgccagggaaaagaatagaagaagcactgacttttctgatactccacttggctcggggggatagatcagttggt  
agagctccgcttfgcaatgggctggtgctgattacgggtgctgcttaattgctcagcgggtaatgtagtatctgtacctgaaaccggtgctcatttttaagta  
atggggaagagactgaaacatgccactgaaagactctactgagacaaaagatgggctgcaaaaaggtagaggaggtagatggcagttggtcagatc  
gtatggatcgtacatggacgatagttggagtcggcggctcctcaggttccctcatctgggatccctggggaagagatcaagttggccttgcgaatgctg  
gcaactatccttcaacctttgagcgaatgtggcaaaaggaaagaaatcatggaccgaccattatctccaccctgtaggaactacgagatcaccacaag  
gacgccttccgctcaggggtcacggaccgaccatagacctgttcaataagtggaacacattagcgtccgctcctgggtggcagtaagggctggagaag  
ggcaatcactgcttfaaaaccagcttcaagtttaagatcaaaagagtcggcgggaaaggggagagctcccgttctggttctctgtagctgattcccc  
gaaccacaagaatcctfagaatgggattcgaactcagcacttttggttttagatttgaagaagagttgctcttggagagcagatcgaatgtaagctgtgt  
tcgggggggagttattgctatcgttggcctctatgtagaacccgctggggagggctgagagggcgtggtttaccctgtggcggatgtagcgggttcgagctcc  
ttatctccagcccgtgaacttagcgtatactatgatacaccgaatfttccaattcggcagttcgtatgatttgcattcatggagctgtgataagatccttcaat  
tagcaccttaggatggcatagccttaacgftaatggcaggttcaaaaggaaagccttggggtgataccttaggtaccagagacgaggaagggcgtagca  
agcagcaaatgcttgggaggtgaaataagcatagatccggagattcccaaataggtcaacttttgaactcctgctgaatccatgagcagcgaagagaca  
cctggcgaactgaacatcttagtagccagaggaaaagaaagcaaaagcattccgtagtagcggcagcgaatgggagcagcctaaccgtgaaaacgg  
ggttgggagagcaatacaagcgttggctgtaggcgaagcgggtgagtgccgaccctagatggctaaagtcagtagccgaagcactactagcttacgct  
ctgaccgagtagcatggggcactggaatcccgtgtaatcagcaaggaccacttcaaggctaaatactcctgggtgaccgatagcgaagtagtaccgtga  
gggaaagtgaaaagaaccccagtggttagtaatagaacgtgaaaccgtgctgagctccaagcagtgaggagggaagtagctctgaccgctgctg  
ttgaagaatgagccggcactcatagcagtggttggtaagggaacggaaccaccggagcctgagcgaagcagcttcatagggcgattgctactgctta  
tgaccgaaactgggtgatctatcatgaccaggtgaagcttggatgaaactaagcagaggtccgaaccgactgatgttgaagaatcagcgatgattggtg  
taggggtgaaatgccactgaaaccagagctagctggttctcccgaatgcgttggagcgcagcagttgactggacatctaggggtaagcactgttctgctg  
gggctgctgagcggatccaatcagagcaactctgaactagatagaccnaaaataacaggggtcaaggtcggcagtgagacgatgggggataagct  
tcatctcagagggaaacagcccggatcaccagctaaagcccctaataagcctcagtgataaaggaggtgggggtgcaagacagccaggaggttgcct  
agaagcagccaccttfaagagtgctgaatagctactgacgagcggccttgcgctgaagatgaaagggggtaagcagctcggagctgtggatgcaaa  
atgcatcggtaggggagcgttccgcttagagggaagcaaccgcgaaagcgggggtcagcaagcggagcagaatgctggcttggatgcaaaa  
gtgagaatcaatgccccaaaaccaaagggttctccgcaaggttctcagggaggtgagtcagggcctaagatcagccgaaaggcgtatgcatggac

aacaggccaatattctgtactacccctgttggtacggaggggagggaggggtaggttagccgaaaagtggtatagggttaaggacacaaggtgacctgctttt  
tcagggtaaaggggtagagaaaatgcctcgagccgaggtccgagtagccaagcgtgcagcgtgaagtagagccccgtggactagccattgcttccacg  
aggctcataccaggcgctacggcgtagaatgtgaaccatgccatactccaggaaaagctcgaacgacctcaaaaaggggtacctgaccgaaaccga  
cacaggtgggtagtagagaaacttagggcgcgagacaactctctaaaggaactcggcaaaaatagccccgtaactfcgggagaaggggtgccccctcga  
aaaagggggtcgcagtgaccagggccggcgactgtttacaaaaacacaggtcctcgaaagtcgtaagacctgatgggggctgacgctgccccggtgcg  
gaaggtcaaggaggtggaactgatgacagggaaagccggcgaccgaagcccggtgaacggcgccgtaactataacggctcgaaggtgagcaaatcct  
gtcgggtaagttccgaccgcacgaaaggcgtaacgatctgggcaactgtctcggagagagactcgggtaaatagacatgtctgtgagatgcccggactacgtca  
cctggacagaaagaccctatgaagctttactgttccctgggattggctttgggcttctctcgcagccttaggtggagggcgaagaaagcccccttccggggggc  
ccgagccatcagtgagataccctctggaagagctggattctaactttgtgcagaccgcccgaagggagcagctcaggtagacagttctatggggcgta  
ggcctcccaaaaagtaacggagggcggtcaaaagtttccctgggcccagacggacattgttcctcgagtgcaaaagcgaaggggagctgactgcaagactacc  
cgtcagagcagagagaaaagtcggccttagtgatccgacgggtgccagtggaaggggcgtcgctcaacggataaaaagttacttagggataaacaggctgatctc  
ccaagagtgccacatcgacggggaaggttggcacctcgatgtcggctctgccacctggagctgtaggtggttccaaggggtgggtctgcccattaatgcggt  
acgtgagctgggtcagaacgtcgtgagacagttggccatatacgggtgggctgtagagcattgagaggaccttccctagtagagaggaccgggaaggac  
gcacctctgggtacagttatcgtcctacggtaaacgctgggtagccaaagtgcgggagagggataactgctgaaagcatataagtagaaccccccaagatg  
agtgctctcctccgactccctagaccctccggtagcacagccgagacagcgcaggggttccaccataggggtaggcagacaagcatgaaataagg  
ataagtagcggcagacgagccgtttaaataaggtgtaagtgaaagtcagtgatgtagcagctgagcgcacaaagaacgaacgattgaaacctgttccctac  
acgacctgatcaaatgatcaggcacttgccatctcttacttgtaactctttgatgaaaagatgaaaaaaccataaaagcttccctctcattctgtgtag  
atagagaggggagagggcagggccgtttgtccctccagtcgaagaattgggctcacaactactcgggtgacgatactgtaggggaggtcctgcggcaaaatagctc  
tggtgtcctaggcgtagaggaaacacacaaacccatcccgaattgggttgaactccttagccatatttctctatgcttctctgcttcgtatctgctc  
atgccagaatgataaaaagcttaaacaccttattttacttttctactatttgaataatgaaaaagatccaaatccaaatgcaaaaggtcgttcttactaaacccatcaatc  
atcacatccccctctcccacttcacacctggaaacgactgttctatagagaaaagggttccctcttctaaaccgaatgaaatggctgagagagggag  
gttctttgggggtgacccccgggaagagatcagtgagacgggggtggccctgtagctcagaggattagacacgtgactagacaccggtgtcgggggt  
cgaatccccctctgccacagcctccaaaggggagggcctttactttcccctagggtgtaggaaaaccatgatcgggagatggagcgaagctattgaaactg  
ggatgctcttcttttctgaagtggaatcgtagaacagaatgtgatacgtagataaaaatgcaatgaaacaaggatagcgaacgggttactactcctaaagg  
tcaaaagcaacccttaattcaattcttattctacattaaagaatgaataaatccccaaagtaggattcgaacctacgaccagtcagttaacagccgaccgctctac  
cactgagcactgaggaacaagggggtgactcctcctagatcaactcctctcaacccatgacaatagctcgaagcttcttctgaactccggaat  
cttcgtagtggctccggtcactttctataggaagccagagtgctctatcttacttacttctagcacttctatcattataatcactccttggcttta  
ttgacataagagatgctattatgctcttcttctatataatgaaaagcagaataatctcatgaaacatcgaagaattggtcatatagaaaacttaagaaga  
aaaaggagaccatgcatatttcaaatcttttctacttagtagtctaaagtctcgtagggataaataatcggctgtgctggactctattatgggttctgacc  
acattcctcatgggtccctcttagatctttctccaacttggtattaggggaaggaagatattcgcgactcctggtgtttcattatggggcagctcattatgc  
cgatctattaccacctctgcactatttcttagctaaacgggtggaagatccatcaatttgggtatcatggactcaaaaacggatcgaatgactgaaatgc  
acgatctcacaggtatcatttctacgatactaaaggtggaatagcgatttccgaaccattctataagaaaagggttccattcttgagaatgattctatata  
aaactatagctattgcaataaagaagaaaagaactaataagaatcgaagacgggaatggtagtagagaagattcttctggtttctgttctgaaaata  
ttctatctcctagacggcgtagagaattgagaatttctgcttcaattctcgtactcgaattgaaaagttacggaagagatccatcttggcaatgaaaacta  
cataaaaaactcggacaatttcaatcagccaagcgtcttaatacatatgcaaaaaattcatttggcccaccatgattagaagatgaatctctgtagaacgct  
attggttgatacgaataatggcagttgttcagtagttaaggatagacagatgataccaattcattagattacttaataagcctatttctatatactctatcccgtg  
aaatctcgaagcgaagatggatgcatagtctatttctctaaatgatacattcaaacgggtgatcaattccataaattggaatagcaataaaataatcagca  
aaatctttttttagatagaagaaacttctctatcctaaataaagaatgtaccctctatccaatccaattgcatcagataaataatcctaaatccagtagatg  
gaataatgcaaattttgggtgacgagattagaaactcaaaataactgacataattttttctcctgacagaaaaatacatgaaaaagaaaagggtaga  
atfttggattatgftaaagaaaagaaaagaaaactgggttctgttgaattcaagatcagttcaccataagatagggactgcttcaatggaattac  
acaaaaagattttcatcggaaagaggtctccgaagacttttgggaaacgtcaacggttctggttatttgcaaaaagaaaatagatagcttataagaat  
cagtcagttgatattaggagcgtgaattctcagctcgaatttttctatttttagtcttagtcttagatgttgcattttgatgacgtttttgaggaat  
catggaaataatccatttctggaataatgaattaggaagaaggtatgagctaccgcttacaagaaaagatctcagatagcaaatgaggccctcagcaccat  
caatgcatgggttctcagctgacgattactcagtgatggaagatgattgattggaacccatattagcttttaccagaggaatggaataaatcggcaatag  
gaaagctacttaggcagagatagggaattccctaaagaaagaaagaaatgaacacagatatacacaataaaaaaaagaaataaagacgaaatcgaac  
tcccctacatatttatttctcctatacaaaaaactagcaaacctactcattggaattccatcaatgacaccttctcgaaaaactcgttagctgggttaactct  
tatacccaaggtaaggtccttagtagaataatctataaaccgcgattatacgaacatataatctttttttaggttaggaaaaaatacttttggacccccctt  
acaaggaatatttaaatcctaaatctgaaaaaaagtagaagcagatcacaataatagcttagtaagaccacaaaaatgctgacttacagaaatgcat  
tagtgataaattcatgaattatggaagaattagaacttctgaaaaaggtgattgaggaggttagccactttgataataggttaattcccttctattcaaaat  
ggattcctatagacaaataaacagatcacaagcagtaataaagagaaatagcagatttccgggtcagggatagacaaaaggttttttagtccc  
tgaagtactaaaagacctatctatttctgtattaacatgaatttggatagattttgaaaaaaagaaactcctctcgtggtgataaacgaaatcctattga  
ctccttagatatacttttccccataacgatattgaaataacgaaatcctttagtagtactgtaatttgaatgaaatgaacagcaaataccatcaaaagtagtaaatat  
atccgaaacatataaacgcagttaactcgtcagtaaaaagacgtattatccaaaaaggggtgaatataaccaactattactaaggatcttcttgaccagaagc  
aagcaagggtggaataaccacaagagaaaagggtaccataaaaacaagttcttgaaatggaatgtatttcttaaacaccatagaacattctgactttt  
atctggtgaaatccacaagaggttccatgaaatgaataacagatccggatcccaagaaataaaaagcttccgaaataagcattgagtaaacgag  
cttgataagaacctatacctagagctaacatataaaccaattgagacattgtagaataggctaagcttctttaaactctctctgagcaagagctaaagtgctctca

agaaaagtgttagtgccttataaagaaatgaaactcattatcaaaaggtagggatatgaaaagaggaaagagtcgagctataagaaaaatccccgcagcaacat  
agttgctcgtgataagagctgaaatgggggtgggctctccatagcatcgggtaaccatacgtgagaggggaattgtgcccattcgcactgcaccaaggaat  
aataaaaaagcacaaaaatagtaagcaaggagtaaatcattattaggaatccagttattgctattttaaacaatcccgaactctaactacctgttatccaaaa  
aaactagaattcctaataacagacaaaaatcccctacacgattagttacaaaagcttttgacaagcactcgtgcaattggccgtgtaaacaaaaagcctatcaata  
aataggaacacattcccacaagctcccaaaaaaataaattgtagcaaatggactagtaaccaatccaacatggagattgaaaaaacttatataacaaaa  
atctcaaatatcccctcatcgtgagacataatcatcactataaataagaaccaggtctacagtagtaattagtattaacataatagaagtaagcgggctcattaaagt  
atccaaattctaagaaaaatcattattgacggfccaaagaccatagatattgatagatagaacttccattatttggtaatagacaggtgaaactgagaatccatagcta  
tacttaaaagtaaaacacataggaagcccatatgcgacgaagatttttggctgttggacaagaaaaagtcgaacccattgacataataactggaaagtggga  
gaagaggggattaccatgcatattgatattgttccataaagaaaagaaattgcaattttacttgaaaaatttacttcaattttctataaaaattgaaaaaagtccgattc  
accaaaactaattctatctatttctgaaggaaataaaaaaactagaaattcttaattttcaaaaatttctcattgaaacaaatcaaaaaataagaaataggtttgtggttaa  
gtcaaaaagttaataaataactcgttacctagtattacctaagaaggacttttataaaatacaaaaaagattgaatctttactttaattttttgtattaaatga  
agcagctcccgtttcgtactcaaatgattgaaatcaattctggaacttttaataactattgattgaatttcccctctttatctcccgtcttatatgggggatag  
gccccataccttatactgtataggagagtagatactgaaatataaattgattfaaataagaaacctttgtatattctataatataaaacaaagtctaaaaaaatata  
atatgttaaaaactctgtctatccgattagacaaaatgaagtaaaaaaagaattcagaattcaatcttttagtactaaagataaataactaagaaaaagaagaaa  
atgattgattgcgcaatagatgctttcacatacaactagaaaaagtaattccttttgatggcagttcaaaaaacgtacttcgatgcaaaaaagcgtatc  
gtaaaaactctggagaaaaagacttatttccatagtaaatcttattgcaaaaatcaagatctttctggcgtcagcgaatcaaaaacaaaggggtttct  
cgcaacaacaacaataataggggtttgggataatgaattgacatctcccaaaaattcaattatataatgaataataggaataatgattaaatgaat  
agtttactttatgtgctgaattcctcgtacataatcttagaacaacctctctgatataaaaaaagggttttggatactgtgacaaatattcttccatcaatga  
actttcgtaaatagaatccgtataataataaaaaaagggttcttattatgaagagtagagttctgcaataagacttacaactctacactcttacttcaatga  
aaaaattagttctatattgcaactgagaaaaaattgttcaactcttcaaaagtcttattgggcaagcagaattttttgtaaaaaatcgaacgatactaccaaac  
gaagctatttfaatgaagattctaatgtcctaattctatggaatcttcaactcgcagattcgcgagaaaaataacttaattcttttataaaactgtatttcaact  
tagccgccatggtgaaattgtagacacgctgctcttaggaagcagtgctcaagcatctcggctcagtcgagtcggcagtcgcaaaaaagaatacaatagat  
tataaaataaaatggattcaatcgaatttcaatttgaatggaccttctctatgctatttgaactttagaacatataactcaatcttcttcaacaattcaat  
tgtgattacgattcaataaacttattagttcgtgaactgggggattgcgcgaltcgcagaaaaaggaatgatagccactttttctgataacaggattcttagttc  
tcgtgggctctcctgggacattttccattaagtaatttatagctcattgatcttctccatgggctctgtatattctcatatgattcctaagatacaaacctaaaaatg  
atttaagcacaataactacgccgagtagtatttaacgcaaggcttgcacgtcgggcttttaactgaaatgcatcaatccacaataactagctctacaatc  
agtggtfaatgatgcatgtagatgtagtactaagctatgcactctttgtcggatccttattatccgcccttctaatgattagattcgaagaatttagattctt  
ttcgaaaaaagaaaaatgtttgcttaaacattttttaaagattgaaattctatgcaaaaagaggtcttfaaaaagcactttttcttatttccaaatatta  
caaatatcaatfaattgagcgtttgattctggagttatcgtgctcattagctagggttacccttfaaccataggtattctttgggagcagatgggctaatgagcgt  
gggagatcactggaattgggacctaagaactgggcaatttacttggaccatattgcaattttacatagtagaacaatccaaattggaagggtagcgaag  
tcagcattgtagctccatagatttctataattggatctgtattttggatcaatctattaggaatggttacatagttatggttcattacattaccatctaaatgatta  
catacataaaacttaataaattggaaaaaacttcaattttgtttgatttgagaacccctggaacgccttcaaaagggttctcaaaaatcagatagatcaatta  
gactctttacttttctgaatttttagtatttccactatggaatataagcggactagtagaagaaaaaaatcctatttaggataaataatggataacagagccttacc  
ctgtcaacggatagcagagaaacaaactctgataaataaccgattcctattactgtaaaaaagatacagattaaaagaaagagttctcgcggccggaatcctcaa  
aatttctgttgaacatgaaatagctgtatccatagaacatctgctgtaacatagataaaataaataagaggttaataatcattcaattgccattacaaaagtaattagc  
attttggcattaacagaattttggactagtaattagtcaaaaaataactactaattccgcaacaaaaccactcattcctgtaaggcaagagaagccattgaaaagct  
actaaacatggtaaaaattttggcattgggataagaacccctcccagttctcagataaaacaaggcgcattctatcaagccgttccgtaagaaaaaaggtg  
agccccataatccatgggataatattgtaaaatagctccattgagtcgaattggttaggaaccaattcctataaataaagaaacctatgagagacggaggag  
taggctattcttttgaattgctggccaaagagaagttgaagctgcatagattttgcatcgtccttattactaaccaggggaaaaatagataatgagcatga  
gtaacaattcatalgtacgcaatcaatcctgtagtctccatcttaataaggattcccgtataaaagcatacatgactgtaatgcttccccatgggtatctgtaac  
cacgtagtaggggtataatcggcaattgacagcataagaataaggaagccaaaaataaataatgatttccaatgttgagggtatgattgattaatattcttccaa  
atctaatctgttctgttgaaccgtataaagccatccatgaactccgattaagaaaaaataatgaaaccactgcagtatacaaaataaactttgtagctgaatagaga  
cgctctccccccccacatggataaaagttaagtaaacaggaattaattctaacctccacatgataaaaaaagtaaaaggctcgcgaagaaaaataatcctattga  
ccgctatacattgtagcatcaggaatagaataatcgggaattccgggtaaccggccaagctgctaaagtagctaaagtagtcaaaatcctgtaataaaatagat  
cctaataaagtcacgattcccaatctcagtgaaattgaagacatctatccatttagaatcctcttttaattggattaaggatcctccaaattgaaatgataacag  
aatgcataagtcattagaaggaattctaataaacaataagacatagatataccactaacgattttgttccccatgaggtaaaaaagaaataatgaacccgcaaatat  
cggcaaaaacaagaatttgaaccaaaggaaaaaactcatgataaagtataaagacaagatacgtttgaccagaaaaagcccgtctcatttttggcaca  
ggctctctcgttaagaggaatcagacgattcaagtgaatttttgaactgatacaataagatagagccatgctcggggtgtctcaggctcaataaaacgggac  
acttaaaaaatctgttggcagcgggattcgcactcttacaacccacacaatctcgttcttggcgcggaagcaattgcttggctttacatccatccaaggtatca  
tttcaatacatctgttggacaagctcgtacacattgagtcactctatacatgatacaatattttacggaatgtgacattggatctataaattttctttcaacataaaaa  
tttctgactgtgcaaaatgaaatagtagtataatcaaatgattgtagacaccagacgaagcaatggttatcaaaactcaacaaataatgcaatataatttfaat  
ccgtttgtagaaaagcagtaaaaagccaaagacttfaattttggcctcaacaatcataattatagcaattgtatatacgaattcgaattagccaataaattggctatc  
gcttttcaataaataatattgcaatattcaattgcaatataatgaattgcaaaaatcaactaagtaaaaaaagaataactatggaataactactcaaaaaatagatattc  
tcaataataaataatgattcatgtaattttcatattattattatggtccctttgtttagaagattctatgctcaattattcaaaaaatagattgattgatacagattgattc  
ctattacgatggatggaagaaagaaatggataatcfaatagctcctcagcagccgcaagggctataacaaaaatgcgaaaaatgctccttttaattggcgctatca  
aatagatcagaaaaattacgagatttagaattgaattcagtagaattcaaggcatattagagcttaacatggttcgcttggatcaatccatagataccaatcg



aaataaatagacactcaaaaaagtacatgctcaaacatcattaactaactccttatcaatctcgattcattcaaatggggacaagaattgaaccgattgaattaatt  
agaatagaacaattacacaacaaaagagaaaagaaggattgtgtggcagtagatgggtttactaaatcaaaatgtggtcttttagtgatttttagattgaaattct  
tataatfttgactcattctaagtattcttattgcccagccatagtaattgcacattataaagaactagaagaattatggaatgagttcaaatggaagataaaaaatcggtt  
gctaaatgaatcccaattgttgacgttattatgagaccctgttctactattgtttgatctttagtccaaaatccatacatgacgatctgggatagtagtcatt  
agtgaaaaaaggatgtatatacaaacgagtgaagtgaacccatctccaatagtccaaaaattcttacttta gaccattctgagccattfacgaacattacggcaaatat  
gatcaagacatttatagctcccacataaataagaagtgtgccacagctacaagaatgtaggaattcaataaaatatagaataaggatatacaacaagaactaatcctag  
cgaaaaaagcagaaaaagtgggttgtaagtaataaccaccctagaccocctagtagaagaacaaatccccaaatagcacagaattcatgtattggcccaggt  
aaatccattatgataagaagaatfaatagtataaattttcatgaactgactaaaactaaaagattcaaggaaagaaaaagggttaggaaatTTTTGTatattgta  
ataagttcttctatagttagaatcacatcacgaaaatctactctgtttaaaaatcaggaataattgcaataagcagtaggtattcttttcttagttagtaagaact  
tttgattctcaaaaaaattctagtaacagtaactgttctgaattccaagatttttctgctctatttactttgagttgaattcctaattgtttgaattgtgtaactcccatt  
atggagattgtaaccgactcaagcaattgattgtaattcaattcatgacgatcataagtagaaagttcatattctcagtcattgataaacagttgtcggacagttact  
caacacaattaccacaaaatatacaaacctcgaatcaatactataattaagcaattgttcttttaataatcctttcaaatcctaaccacaagaggtagatctatagg  
gcatacgcgaacacatactcacaagcaatacttatcaaaftcaaaagtggattcggccccgaaacgctccgatgtaattgattttcataggggtagtgtaactgta  
taggtaaacgattgtgtgggataaggttaattgaaactttgaccaatgtacctgctgcgctgattgtttgtgaccataactatgaaccagttaccataggggaaca  
tattgaaatctatgaaaaaggatgtttcttctgtttgagaggactttgtttgaaaatattctactgttattgtattatctttttatagtgaaacaagttgggaag  
aagttgtaataagagattgccagggaatggttaaaagaatttccatccaagatttaactgatccattctcactctgggtaagtcattcttattgtatagaaa  
tgaagagaataaataagcttttagttaatgtaataagatactattgtcatttcaaaatctaaccattttattcattttgaaaaatccaaaaaggatataatagggaata  
gacaaatccccccttaagtagaacctgttacaataaagaggaaactaataaatttaggtaagaacaagataaaataaaccataatgataccagaatattc  
gtttgataactgctactaaattctctccgcttctgttaaatcaaaagggttaactttcaacttccgcaaaagaaatagaaaaaacagaaacatataaggctgacg  
cgaagattccatccaaaaaacatattttgactgtgcttcaactatatacaactgtacttgaactgttggataatcatgctgacgataacatcacagttcccaccgcta  
ttcaaaaaccgtacatgaacacttagttcatagcgtcctctatgatcagaaaaaggaaagttactgtttcattcgttattatctcttgggcgtatgtaaatatctaa  
gataaaatcgattcaacgtcctaattagaccaaaggaaatctgtctgctagaataataaaaaacgcttcggaattcatctcatcctttataataatggtacttttctt  
gttcagcaataactaatcttgaataaaaacactgttatacaatfaataaacgaaagagttgggtattagttcatgaagaattctgtatgaatggataaacgacg  
gaaagaataaataagatctttttttgtattgcaattccatattttgtcctattcttcttccccgaggggtatttaaaaagaaaaaggaaataagggttaattcgttctg  
atagccatttcttaacaagtgaatgggaacatactctggatcggaaatccgaagaagttactactgtctcattccaccaattcaagtccttattatgattcctttatgag  
gaaaaatataatgcttttagattccctcattactaactctttatgacttttagtttctaactcctactaacttttgacggattcccttagattacaactttctgtatcggga  
atcccttattattgcccgttcaagatagtagactaatcaaaaaatcaacttgggtgtaaaagaatttacaccgcttatttactccatttttctgtacatagaaat  
gagatttttctttactacaaatfaataagcagttttgttctactatagctatctagttaacttactaacctgaatatagaataagaaaggagataaatattcaatg  
aatttcagaggaaaaagatcctattttaacgaatcgcacgtagagatattgctagtacaaaaagtttaaggatttcataactaatagattgagcggcagctcgtag  
accacctgaaaaagaatatttattttgagctatattcctccataagaagaccaatagggcaactactgaaatggcaatccataaaaaaacaccaataactaatgaccc  
gctaaaaacaagcgatacccaaaaggaaataactaaaaactfaataaaattgatagactgctatagacggctcaatgctaaataagggaatccctcgggatgg  
caagatattccttttaaaaagtagcttagttccatctgctatagctggaagcagtcaccagggggccagcatattcaggaccaatagctgtgtatcgtatgagcggatatt  
cttttctaaccacacaattacgagttacttattgtgattcccagtaagagggtcaaaatgggtagaatccatcatagctccttttaataattccaagttcga  
aaaagaattgatagcttactctgacccctgtctattatcaattcaacgatcaacttcccaatgatactatactactcaatatactgcatgatacgaacattcattttt  
ttgactagctgaggaagaatttgaatfaataaacccgggtgacgaattttccatctccaggggaaaaagactatctcctaccagataaattcctaattcactttt  
ggggtctccactctgcaaaaactgtttgacaattcaaaatgggtgaaagtttttaccagaanaatcgatattcaaaatcattcattcggaaattcttcttcttaa  
agcgtcggacttcaaaatctcataaggccccaggaattttctacagcctgttgaataattttgattgattccctcattcaccgatctgactaaatagcgtgctaat  
gaatcccttcttttgcattggaattccaatcgaattgattgtaagactgtaaaatcactttacgaagatccattgtattccagaagctcgtaacatggggccc  
gataagccccatttacgcttcttccgtaataaaaactcctcaactgttccaaaaaatgggattctgtgataaagttgttgataatcaaaactcctcgt  
aaaaataatcacagaactcaaacatttatgacatccataaggcagatcggcagcaactcctccgatgcgaaagtaattatgcatattcgcatacctgtagcag  
cttcaaatagatcatataaattctctctcttaaaaataaaaaaggagctcgcaccgagatctgcataaaaaggtccaagccataacaagtgagaagctat  
acggctcaattctaacataaattaccctaataatagctggcttctgggtatttgaatatttccaaagaattctgtgcatffaccgttattgcttctgtaaacatagtagctaa  
ataatcccaacgtgttacataaggtaagattgtataatagttcggtttccgcgatttttccattcctctgtgtaaatagcctaataatgggttcaacaataaacattca  
ccatcagagtaacgatcagcgaagaacacatgcaattgaggggtcgtgagggccatattgactatcatgagatcttttctgtaagcgtgtagactcatactttct  
tcttaattcattatccatgaaaatggattatccatgaattcctcaaacgaggtcatcaaaatgcaaaatctaagactactataagactactaataaaaataagaaaa  
aaaattcgaacgatgaattaccgctcccaataatcaactgactgattaatttcttataacgtactctatttttcttcccaataagccagcaaacgttgacgtttccca  
aaagtctcggagaccttctccgatgaaaaatctttttgttaattcacaatgtgaagcaagctccgatcttattgggtgaaactgaactgtgaaattcaacagaacc  
ccagtttcttcttttcttcaaccataaatacaaaaattttctaccctcttcttttctatgattttctgatcaggaaaaataaaaaattatgcatgatttttgaagtattct  
aatctgtacacacaaaaattgcaattatctactactggaattggattattttatgatgcaaatggattggatagaagggtacattctttattttagatagaag  
aaaagttctctatcaaaaataaagaattttgctgatttattttgctatattcaattatggaattgatacaccgtttaaattgatatatttagcaaaatgaacatagcat  
atgcatccatttccggctcagaaattcagggatagagatattgtataagaataagcctattaagtaacttaaatgaattgtggatcatctgtatccttaacatact  
gaacaactgccattatctgatcaaaccaatagcgaattcacaagttaaacttctaatcaatggtggcccaataatgaattttttgcatatgattaaagacgcttggc  
ctgattcgaattgtccagagttttttatgattttcattgcaaaatgatgactccttccgtaactttccaattacgagtagagaattgaaagacatgaaaattctcaa  
ttctacggcgtctagagatagataaattttcaggaacaagaaaaccagaagaattcttctctattcactaccattccgcgtctcactctattatgatttctttc  
tttttaagcaatagctatgattgataagaatccatttctcaagtaagtgaaaccttctcttattaggaatggttcgaaaatcgctattccaccttttaggtatcgtgaa  
aagtgatacctgtgaagatcgtgcaattcagtcacattcagatccgtttttgagttccatgatataacaaattggatggatctccaccggttagctaaagaagaatg

atgcagaggtggataatagatc gatatgaagatcatgagctgccccataatgaaccaccaggagtcgcgaatattcctcttccctaatccaagattggagaaag  
aagatctaaggaggaccatggagaatgtggcagaaccataatagatgccaccgaacgaccgaattaattatcctcatcgagaaacttagactactaagta  
gaaaagattgaaaatcatggcatgggtctctttttcttttagatgtttctatatgcacaattctc gatgttc gatgagaatttctgactttccatatatagaaagag  
atagactataaatgacatcttattgcaataagaccaaagggatggatattaaatgataggaaagtctaggaagtgaatagaatgaaatagagccactctgggctt  
acctatgaatgagggatggaacggagccactgaagaaatccgggagttacgaaagaagctcggactcataftttcatgggttgagagcgggaggtgaaact  
ctaggaggtcgaatccccctgttctcagtagctcaggtgtagagcggctggttaactgactggtcgtagggtcgaatcctacttggggagattgattcattctt  
aatgtaagaataaagaattgaattaaagggcttgccttgacccttaggagtagtaaccggtcgtatcctgtttctattgcaatttatcctcatcgtatcattctgttcta  
cgattccacttcgacaaaaggaaagagc ataccgaatgcaatagctttacgtccgctatcccgatcatggttttctaccctcaggggaaagtaaggccctccc  
ctttggaaggctgtggcgaggagggttcaaccctgacaccgtggttcgtagccactgctctaatcctctgagctacagcccaccctgctccactggatc  
tctcccgggggtaccccccaaaaggaaacctcctcctcagccatttcatttcgggttaagaagatgggaaagccctttctctataagaacagtgcgtccga  
ggtgtgaagtgggagagaggggatgtgatgattgaggtttgaaataagacgacctttgcaatttggatttggatcttttctgatttcaaaaatgtaaaaagtaaaata  
gaggtgttaagcttttatcattctggcatcggactatttgcgcaggacctccccctacagatcgtaccgcaagtagatttaccaccaaaatcgggatggattggt  
gtggttctctacgccttaggacaccagaatacgaacctgaacgagggaaagcagtagagaaatattgctagtaattgtgaagcccaattcttactggaagg  
gacaccaaaaggctctgcctcctctctatctcaagagatggaaagggcagagcttttttggttttctcttttcaaaaggtgaaacaatgaagatagatg  
gcaagtgcctgatcattgatcaggtcgttaggaacaaggtcaaacgttcgttcgttaggatccctcagctgatacactgcaactccactgacacctattt  
aaacggctcgtctccgctaccttactctatttcatgcttctgctcctatcccgtatgggtggagaaccgctcgtctcggctgtgtaccggaggtcctag  
ggaagtcggagagagagcactcatctgggggtgggttactactatagctttcagcagttatcctctccgcaactgctaccagcgtttaccgtaggcacgata  
actggtaccagaggtgcgtccttccggctctcgtactagggaaagctcctcctcaatgctcctaacgccacccggatagaccgaactgtctcagacgtt  
ctgaaccagctcagctaccgcaataatggggcgaacagcccaaccttggaaaccactacagctccaggtggcgaagagccgacatcagggtgccaaccttcc  
cgtcgtatgtggactcttgggaaagatcagcctgttatccctagagtaacttttaccgttgcagcagcccttccactggcaccctggatcactaaggccgactt  
tctctctgctcagcgggtgagcttctcagcgaactccttctgccttgcactcagggaccaatgtccgtctgcccagggaacactttgacgcctccgttactt  
ttggaggcctacgccccatagaactgtctactgagactgtcccttggcccgggtctgacacaagggtagaatccgagctctccagagtggtatctcactga  
tggtcgggccccccggaagggggcttctcgccttccactaagctgcgcaggaaagcccaaaagccaatcccagggaacagtaaaagcttcatagggctt  
ctgtccaggtcaggtatgctccatctcacagacatgctatttaccagctctctccgagacagtgcccagatcgttacgccttctgctgggtcggaaactacc  
cgacaaggaaatctgctacccttaggaccgttatagttacggccgcttaccgggcttctgctcggcttccctgtcactcagttaccaacttcttactcctg  
gcaactggcagggctcagccccatacgtcttactgcttgcggagacctgtttttgtaaacagtcgccgggctgtcactgcgaccccccttggag  
ggggcacccttctcccgaagtacgggctatttgcgagttcttagagagattgtctcgcgccctaggtattctctactaccacctgtctcggtttcgggt  
acaggtacccttctggaaggtcgtcagcttctcctgggagtaggcatgggttaccatactcagcggcgtagcggctgttagcctcgtggagaagcaatgg  
ctagtcacgggctcactcagcgtcagcgttggactcggacctggctcagggcatttctctacccttctaccctgaaaagcagggtcacttctgt  
ccttaaacctataaccttctggctaaccctagcctcctcctccctccgtaccaacaaggggtagtaggaatattgacctgttgcctatcactacgccttccg  
ctgacttagccctgactcaccctccgtggacgaaccttgcggagaaaccttgggtttcggggcattggttctaccatgtttctgactcagccgacattct  
cgctccgctcgtcgaacccccgttctcgggttctcctcctaaaggcggaaacctccctaccgatcttttgacatcccacagcttccggcagatcgttagccc  
cgttactctcagcgaaggcgtcgtcagtgagctattacgactcttaaaaggggtgcttcttaggcaaacctcctggctgtcttggacccccacctcctta  
tcaactgagcgtcatttagggccttagctgtgtagcgggtgtttccctctcagcagtagaagcttaccctcctcactggccgacctgacctgttatttt  
gggtcatatctagatcagatttgcctcgtatttggtagcgtcgcgcagcccgcaccgaacagtgcttacccttagatgtccagtaactgtcgcctcaacg  
catttcggggagaaccagctagctctgggtcagtggttacccttaaccacaactcatccgctgattctcaacatcagtcggttcggacctctgcttagttca  
tccaaagcttactctgtcagtagatcaccaggttccgggtccataagcagtgacaatcgcctatgaagactcgttctcactggctccgggtcgggtccgctc  
ccttaaccaagcactgctatgagtcgcccgtcattctcaacaggcagcggctcagagatcatttccctcccactgcttggagctcagcacggttccactg  
ctatttactaccactgggggtcttctcacttccctcaggtactactcgtatcggtaaccaggagtagtattagccttgcaggtgtccttctgcttaccacgg  
gattccacgtccccatgctactcgggtcagagcgaagctagtgatgcttctcgtactggactttagccatcaggggtcggcactcaaccgctcgcctagcag  
cacaacgcttattgctcctccacaacccgtttcaggggttagggctgctccattcgtcggcgtactacgggaatcgttttcttcttcttctgctactaag  
atgttccagttcggcaggtgtctcttgcctgctcaggttaccagcagcaggttcaaaaggttaccatttgggaatcctcggatctatgcttatttcaactcccgaag  
catttctcgtctgtacgcccctcctcgtctctgggtaccagtagtatccaccgcaagccttctcttfttgaacctgccattaacgttaaggctatgctcctaaagg  
ctactaaatggaaggatcttataacgtccatgaatgcgaaatcatagatcgaactgcgaattggcaaaatcgtgctatcatagatccgtaagttcacggcgtg  
gagataagcggactcgaaccgtgacatccgccacagggtaaaccaccgctcctcagccctcccaggggttctaccatagaggcaacgatagacaataact  
ccccccgaacacagcttacaactttcatcgtactgtctcctcaaaagcaactcttcaaaaatcctcaaaaacaaaggtgctgagttggaatccattctaaggatt  
cttgggttccggggaatccagctacaggagaaccagggaacggggagctcctcccttttccgcccacttttgatcttaaacftaaagatgctggttttaagaacga  
gtgattgcccttctccaccttactgcccaccggagagcggacggcctaattgttccactattgaacagggctatgtcgggtccgtgacctggagccgaa  
ggcgtccttgggtgatctcgtatgtctacgggggtgagataatgggtcgggtccatgattttcttcttccacatttgcctcaaaaggttgaaggagatag  
tgcataagctattcgaaggccaactgatccttctcccaggatccagatgagggaaagcctaggagagccgcccactccaactatgctcatgacgatcc  
atactagatctgaccaactgcccactcctactctctactttttgacagccatcttttctcagtagagctttcagtgcatgtttcagctcttcccactttaga  
aaaagtgagccaccggtcaggtacaagatactaccattaccgcttggacaattagacgccaaccgtaatcgaacgaccaatgcaagagcggagctctac  
caactgagctatataccccgagccaagtgtagtatgatgaaagagtcagatgcttcttatttcttccctggcgcagctgggcatcctggacttgaaccagag  
acctcggcgtgaaatgtaaatcctgcccctacgatcaaccaattgggagagaatcaatagactcctttcgggagcattatcctcccgaacgagcagataaac  
tctcgttactgctcttcaagtgtgcttctccttctcccccttaccatggcaagcttgggaaataactccgatgggcagaaaaaggaaggcgttaagaga  
ccctctgcccaccctagacacttaagatccttttcaaacctgctcgtcctccatttcagtgcaagagatagataatgcccacatccattgcaactgacgagg

gcgctcgtagtacttagggagtcgaagaccaagaagtgcttattatfataccaagcattcctcttatggctagatccaacctcctggctcctcgggaaaggaaaaag  
aatftcactgttcttccaggaaggagtagggaggtcctattgattgctgttctccagaccgccgggaaaaagcatgaaaaaaaggctcgaatggtacgat  
ccctccgtcaccagaaatgaaagggtgatctcgtatgcttctgctgtgagatgctgtttaggtgctccattttccattgaggacgaacctcaacctgtgctcga  
gagatagctctccatacactgataaggatgtagtattctgagaagagaggaccgtagtccccccggaccgccggatcccacagtgatgaaagaaagt  
tagatctacatgggatctcactgaatgccccatctatcctctgaggagaagttgtttgtttcaaacctcgattcaaacaggagagtagcgcctaatgtgc  
cttgatgatccacatcttccggcagcgcgtgatgagcacattgaactatccatgtgctgagagccctcacagcccaggcacaacgacgcaattatcaggggc  
gcgctctaccactgagctaatagccgctcgcgcggcctcccaaggaggcctgctacgccaaaagcgaagaaacctcccttcttcttgatccccatg  
ccgccacaccacacggggggggcatggggacgtcaaaaaggggatcctatcactatcaactaattgtccgacctaggataaagctcatgagcttggctta  
cttaccctaagcaagaagacttccatccaagtttagctcagacgtagctccttctttggcgctgaagcagtgcaaaacaaaatacccaataagcataagc  
attagctcctcctgaaaaaggagtgatccagccgaccttccagtagcctacctgttacgacttccactccagtcgcaagcctagccttaggcatccccctcttac  
ggtaagggtaatgacttcaaacatggccagctcctatagtgtagcggcgctgtgtacaaggcccgggaacggattaccgccgtatgctgaccggcgattac  
tagcgttctgcttcatgagggcaggtgacgctgcaatccgaactgagacggggtttggagtagctcaccctcgcgagatcgcgacccttgtcccgccat  
tgtagcagctgtgctgccagggcataaggggcatgatgacttggctcactctcctctctccgcttaaacccggcggctgtgtaggggtccaaactcatagtg  
gcaactaaacacgaggggtgctcgttgcgagacttaaccaacaccttaccggcagagctgacgacagccatgaccacctgtgtccgcttcccaggggca  
cccctctttcaagaggatcgcggcatgcaagccctgtaaggcttctcgtttgcatcgaattaaacacatgctccaccgctgtgcggccccgcataatcc  
ttgagttcattctgcaacgactcccaggcgggatacctaacgctgtagctacgactgcacgggctgagtcgacagcactagtagtccatggttacggct  
aggactactgggctctaatcccatttgcctccctagcttctcctcagtgctagtgctggcccagcagagtgcttccgcttggcttcttccgatcctaatgcat  
ttcactctccaccggaaattcctctgcccctaccgactcagcttggtagtttccaccgctgtccagggttagccctgggattgacggcgacttggaaaagc  
caactacagacgctttacgccaactccggataaacgcttgcactcctgtcttaccgcggctgctggcacagagttagccgatgcttattcctcagataaccgctatt  
gttcttctccgagaaaagaagttgacgaccgtggccttccacctccacgcggcattgctccgagccttccgcaattggcaaaattcccactgctgcctcc  
cgtaggagctggccgtgctcagctccagtgctgctgatcctctcggaccagctactgatcatcgccttggtaagctattgctccaccaactagctaatcaga  
cgcgagcccccttggcggaatttctcttctcctcagcctacggggtattagaaccgttccagttgttctccctcccaaggcgaggttcttacgcgttactc  
accgctcgcactggaacaccacttcccgttgcactgcatgttgaagcatgccgccagcgttcatcctgagccaggatcgaacttccatgagattcatagttg  
cattactatagcttcttattcgtagacaaagcggatcggaaattgttcttcccaaggataaactgtatccatgcgctcagattattagcctggagttcgcaccag  
cagtatagccaacctaccctatacgtcaatcccacaagccttattacccttccgctgctgctggggggagtaagcaaaatgaaaaaacacattggg  
tttagggataatcaggtcgaactgatgacttccaccagctcaaggtagactctaccgctgagttatataccttccccgtcccctcagaaaagaaataaacgaatc  
ctaaggcaaaaggggcagaaaactaagccaccttctcgggcttcttccacactattatgatagtcaataatgggaaaaattgattcaattgtcaaccgg  
tctatcgaaaatagattgactatgattcagccatagcacatgtttcataaaatctgtacgatttcccgatcaaatcagcaggttccatgaagaagatctgt  
tcagcatgttctattcactgtagtaggagaagaaccgactcggatcttcaaaaaagaggggaagcagaaccaagtaagatgatagggcgccttcttctt  
gcccacaagatcttaccatttccgaaggaaactgggctacatttctcaatttccattcaagagtttctatctgttccacgcccttctttagacctgaacatgaaat  
ggcaaaattccttctttaggaacacatacagaaaaagataatgtagccctcccaacttacttcttcttcttcttcttcttcttcttcttcttcttcttctt  
ccgagacagaatttgaacttctatccttcttcccaataggcaaaagattgacctctgtagaaagactgattcattcggatc gatatgaggaccacaactacgttgact  
gccagaatccatgttccatatttgaagagggttgcacctgtgcttctctatggtacaatccttctctctgtagcccttcttctcctcggctccacagagaaaaatgg  
aggactgggtgccagacttcatcacggaagaagaactcacagagccgggactgtaactaataagaatgactactaactaactaataatataagaatagatc  
tagaaatagaaacgaactaataatagataatgaaattgaaaagaactgtcttctgtatacttccccgttctattgctaccgcgggtctttagcaatc gatcggatca  
tatagatcccttcaacacaataggtcctcagaaaggatcctggacgactcaccaaaagcagaaagccagttagaaaatgattctattgaaaggtgcctaac  
cgcatggataagctcacttaaccgtcaatttggatccaattcgggatttcttgggaagttcgggaagaatggaaatggaataatagattcacaagaggaa  
aaggttcttattgatgcaaacgctgtacctagagataggatagaggaaagggaaaaatcgaatgaaataaataaagaataaaagcaaaaaaaataaagtc  
gaagatagaagagcccagattcgaatgaagaatgaaactgaaaaggatccttctgattcctcaaaagatgaggggcaagggtttagaccgagaaagattt  
cttcttattataagcgtgatttgcacatgtttgtgtaaaagaacaacttctctttaaatacataatgaaagtgttcaattagaacatgaaacgtgactcaattgg  
tcttagttagcttccggcagcaggtggaagaaggcgggagactctcgaacgagaaaaggatccctcgaagaatgaaacgaggagccgtatgaggtgaaaaat  
ctcatgtacgggttctgtagaggacaggaagggtgacttattctgacttctcactatcaacccccaaaaaaccaactctgcttaccgtaaaattgccaagtagc  
attaacctctggatttgaatcactgcttatactctggtattggccataatttacaagaactctgtagtattagtaagaggaggaagggttgaaggatttaccgggtg  
gagatcgcattattcaggagccctagatgctcgcagtaaaagactgcaacaaggcgttctagtgctgttagattctatccaagacttgcattctttagatga  
tgccatgtgaatcgtagaacatgtgaaggtatgctaacccaatacgaagttctgaaggggactgagcagcctaccatgagacaaaagatcttcttcttaa  
agagattcgttccgaaacttatagtccaaggtcaatagaaattctttaggggttcttcccttcttcttcttcttcttcttcttcttcttcttcttcttca  
gaacaggtccgagcaaatagcaatgattcgaagcacttcttcttccacttcttccgaaacctaaaggactgaggtatggatggataatgaaatacagatttccga  
tcttagcgggaaaaaggaggaaacggatacctaatftaagtgagtaaacgaattcctactcagatcctatagatccctatagaattctgtgaaagccgtattcga  
gaaagtgtatgtagcgttggaggagacttctctatcttccgagatccacctacaataggggtcaaaaagccaaaaaaataagtgattctttagccctataa  
aaaagaaacgattcttgaaccttctcactgctcatgtcagctcaggtactgcagaaaaaagactgcaaaatccgatccttcttctgtaacgattagttaacatg  
gtggttaaccgtattatgaaagacggaaaaaatcattgcttataaattctctatcagccgtgaaaaagattcaacaaaagacagaaacaaatccactattgtttt  
actcaagcaatacgtagaactcctcaatagaggataaaaaacagactaataaaaaagatcgcagcggaaagtccgattgaaatagatcctaaacaagg  
aagagcacttgccttctgttattagaagcatcccaaaagcgtccggctgaaataggtcttcaaatagttccgaattagtagatctccaaagggggtgg  
gggtgccatacgaaaaaaggagcactcagaaatggcagaggcaaatagactcttgcacatttctgtaaatccatgaacagaatctaggtatgtagacacatg  
gatccatacctcgtatcggaaaagaaatcaatagaaggagaatcggacgatatttctcgaacaacaaaaagaaaaagaaagagaaacagaatcagatc  
aactaagccctcctgggggttcttgaataaagaaggaatctatgaaatagcatggaataaggtttgatccttctatggggattccgtaaatatccattc

caaaaatcgaacaatcgggacttttcggagattggatgcagtactaattcatgatctggcatgtacagaatgaaaacttcattctcgattctacgagaattttatgaa  
agcgtttcatttctctctccagggaagtttcattttccagaatgtatcctaattttggcctaattctctctgatgacgatttaacctctgatcaaaaatagacctt  
gggtctatttctcttcaacaagtttagtaataagcataacggccctattgtccgatggagagaagaacctataaftgctttcgggaaattccaacgaacaatt  
caacgaatcttcaatttctattttatgttcaactttatgtattctctatccgtagagatcattgaaatgtacagaatgctataacagatttctgtattctgattaac  
agctactctaggggaaatgttttattgtggtgtaacgatttaataactatctttgtagctccagaatgttccagtttatgttccctacattgtctggatataccaagagaga  
tctacggctaatgaggtactatgaaatatttactcatgggtggggcaagctcttattctggttcattggttctctggctatafgttcactctgggggggagatcgag  
ctcaagaatgtgaacggtctatcaatacacaaatgtataactccccaggaaattcaattgcgcttatatccatcactgtaggacttgggtcaagctttccccagcc  
cctttcatcaatggactctgacgtctacgaaggagtggttcgacaaaactctacctctatactctctgagggtttgggttttgcataactccatagatag  
cagaagagaaatgctatccccactccgaccaagacagaactttaccaaaagtttattgtatctttttgtcaataacaattaaggtgaagcagggtcaggaacaac  
gaatctctttatgataaacagatccatttgcagctctgtttacgggtgttctcaaaaagaatcgactaatgactatacaatgcttgaattatcgactagatgcta  
catagttgggtctcatctcagagactacgagtgtaataggagcatccgttgcataaaggatccctaaagatgatcatctcatgctattgggaacgaatcaaatc  
agatggttctatttctcaacctttctgacttctctacggaaaccaaggtcgaaggattgaaaaagtcagtcattcacaacctgatgaaggattctcgaaggta  
aggattagtagttcttttcgaaatcatttgcataaagaatggattcgtctatacagcgaggaaatcaaaaaagaagaagacagtttcttctttttat  
cacttaggagccgtgagatgaaatcctacgtcaggtttgcatgagagaaagagcgaggaaatcctttctgactctgactccccactccagtcgttctttc  
ttctgttacttcaaaatgctgcttcaagcctacgacgcaattctcgaattcttttatttctcaaacgaatggcattcttctggaaatcctagctattcttagc  
atgatttggggaatctctgtattactaaacaagcatgaaatgtagcttgcatagggcaaatggatgtaatttggaaatgttggagact  
caaatgatggatgcaagcatgataacttatatgctttctatctccatgaatcaggaacttttgccttgcattgtatttggctacgtaccgaaactgataacattc  
gagattatgcaggattatacgaagactcctttttgctctcttttagccctatgtcttccctagggcctctccactagcaggttctcggaaaactctat  
ctattctgtgtggatggcaagcagcctataattcttggttcaataggactcctacgagcgttcttctactactattatcaaaaatagcaagttataatgactgga  
cgaaccaagaataaaccttattgtgcgaattatagaagatcccccttaagatcaacaactccatcgaattgagtagtactgtatgtgtagatcactataacc  
aggaaatcaatgaacccattctgcaattgctcagatacccttttagctgtagtctatttctagttcaagatcccccttactaactggaataaagaatagtag  
atctgtccgccaaaatgggaatggcgctagggtaatgaaactataatcgaatcactgatcatcagattataagttcattccataccggaccagaccgtc  
acattctattatgagaaggggtcattcagcctatggaataggactctgtttacatagaatccccacgtccttacttctatttaggattaggaatagggtfaatca  
gacctgtttgacatctatctctatcttatttgggtaccatagcactcttgggtcttattgaaatgagaaatggattgtacatcttttattttgatacataaggt  
gtctactaggataatgcaaatcgaagctattttagtctgactcagccctatagaccgatcgaatcactcaagactccactttgcatatattccatatacaca  
ttagatagatcatattcatggaatcattcactttcaagatcacattagatagatatactattcatggaatgatcactttcaagatgctttagtgaatgta  
gacacgcgagactcaaaatctgtgctaaaagcgtggaggttcgagctcttcaaggcataaacgagaatgcattcaatgagcattccccgtagaagtatt  
ccgaaatctgcgctgctctctctctctctctctctctctctctctctctctctctctctctctctctctctctctctctctctctctctctctctctctct  
tctaaaatccctcgaaggagataataataaagaacccaaagcagacggatcctactctcgaagggtggtctttaaagaatcaaaaagaggttctcagaagagat  
agatgatcccaacctctattgtctctcgtaaagccttttttaccgacagaaaagtgactacgaattcccccttttgggtgcgaatccccgtttgtatctttgagc  
gcacgccataagtagcgaatcgaagaaatcgaatcaaacgatcccaatcctgaaagagaactccagatccagggaagcttatcataaagggtctcgaag  
gggttttattcgttcttgagcaaaaagataaagatcgatagattcgaaccgaattgcaaaaggaatcactactatgccagcccaaatcatgatcttccaacttgg  
atttgggtctctcgcgaatcgcgagttgcagagatgagaacatgaaaagcaagatcccgaataagaaaacagaacagggaaccacaagagtgaagact  
agtagactctctcttttgcattcttctctcttctcactcaatgattcctcgaattcccaccataaaatctatagttctattcatagggcctcgttgaagtctaca  
gatctagtgactggaaactgtggttaggaccgaaatccttagttagaactgtcttttccaaagtaaaaacccccagttatgaaagaatgaaaaggtgctttcgt  
tctttctgtggaataaagcccctgacttaafgaaaggaaaataggaattttcattaggtatttgaccataatagatgctccagttcctatagaacctactaa  
aataccgatagggtgaagcgaacgaaaaggattttccctgagatgtaaatgaaaacgattagccccatagcaggtttgggaaatagtgatgagcaaggaaat  
acgtctttctgctaaaagagatctataaactataatcattagatcttgttcaatgtcaactaggatcataagtaaacggatcccgttgtcaatcctttgataacc  
aaggctatttctgctaaaagagaatgatcactatgagtcagactcaatgaatggatccattcgaatagcagaataggattctggaatcctctcaatctctttc  
aatcagagatccagagaggtgtttctatgctatctccgaatatttccatctccgaatatttctgatttctttctatgatgctttctatgaaaattggtatttacg  
atgtacgatgatccctgttaagcatccatggctgaatggttaaacgccccactataatggtaaaattgcggttcaattctgctggatgcacgcgaaccggaac  
gttccataagctattgaaactggtctctatccatggaatctatccatcactacataaacgaattggtatggtatattcataccataaacataaagaacataaagaactc  
gaattctatcgactggaactcagacataggagggaagtcgatttattggatggaactcaaatcagcagattttacagaaaaggtctctgtttattgggaaagaaat  
caatatacttttaatgcaatcgggattcactaagacagaataaagcattgggtcgaactcttcttgggttaaggtagtagctggaatagccatcgactaccggg  
aaagggtagaagaatggccctattctaggacatacaatgcaatcagacgtatgatcattaccctcaaccgggttattctattccactctagatagaaaaaac  
taaaggagaacttaataatcggcgaacattatacaaaacacctatcccagacacgcgaagggaaccatagataggcaagtgaatccaatccacgaaata  
atttgatccatggacggcaccgttggtaaaaggtcgaattccagaggaaatcattaccgcaaggcatagaggggggaggtcataagcgcctataaccgtaaaatcga  
tttctgacggaaatcaaaaagacatctgtgtagaatcgaacctagaaatcgaactcaatcgaatcgtacatttctctacacataggggatggtgagaagg  
atataatttatccagaggggtataattggagatactattgttctgtfacaaggtctatataatgggaaatgccctacattttagtgcggttgaactattgatt  
acgtaattggaagtaaccaatgatttacgacgaacctaagaatcgaactgatcatttactacctctacggatagacctcaacgaaaactgttgagtaa  
cggcagcaagtgattgagtcagtagtctcatagaaaattattgactctagagatattgtaaatgagaagacaaaattgttgaagcagcagacaaccggaa  
gcgccctgtttcaaaagagaggagcgggtattcacttaattttagtgcagagcgaattgaaagcgaagcagtggaatgaagacccccgggggaaaata  
gggatgtctctacgtaccataatgtagaatcagcgaatttcatagagctatcgaatgctacatgagaacataagccagatgacggaacgcgg  
agacctaggatgtagaagatcataacatgagcattcgcagatttggattccttctatatactcactatgttgacttcatatcattcatataagatccatctgt  
ctagagatgctatatacatctagaagccgtatgctttggaagaagcctgtacagtttgggaagggtttttgagagaaaagaagaatctacttcaaccgatgccc  
cttagcagcggccatacaataagaaatcacagtggaaggggtggcgaatagctagagcagcaggtgctgtagcgaactgattgcaaaaagaggtaaat

cgccacttaagattaccatctggggagggtccgttggatcccaaaactgcttagcaacagtcggacaagtgggtaatgttgggggtaaccaaaaaagtggg  
agagccgggtctaagtgttgctaggtgaaacgccccgtagtaagagggtgagttatgaaccctgtggaccacccccatggggcggtgaaaggaaagcccca  
ttgtagaataaaaccacaacccttgggttatctcgccttggagaagaactggaagaaatagtgatagttttatctctgcccgaagtaaat  
acgtaactgagaatagtaaaatgcattttggaattgcaataatgggatggcgacgacgggaattgaaccgcgcatggtgattcacatccactgcctga  
tccacttggctacatccgcccttatccagctaaaggattttctcttttccattcatatttctatttctgacctccatactcgcgatgagatattggacatcgaatgc  
cactctttaaagtgaataaaaggagtaatcagctgtgacacgaaaaaaacgaatcctttgtagctcatcattattggcaaaaatagaaaaggtaaatgaagg  
aggagaaagaaacaatagtaacgtggtccgggcatctagcattctaccgcaatggtggccatacaatcgcgattcataatgaaaggaaacatacctatttac  
atacaaatcctatgtaggtcgaatgggggaattcgtaccaactcggcatttcacgagttatgaaagtgcagaagagatacctaaatctctgctgtaactgaatt  
cagaatgaaagattcaaaaataaaaaaaagaaata

>O.barthii\_IRGC101252\_cp

cccaatattctgctgaagcaagatattgggtatttctagcttcttcttcaaaaattgctatatgttagcagaaaagccttatccattaagagatggaactcaagagca  
gctaggtctagagggaattgtgagcattacgttcgcttacttccataccaagattagcagcgttgatgatagcagcccaagattataaacgcgacctggctat  
caactacagattggtgaaatgaatccgttagattgaaagccatagtaataacacaaagcagtggaaccaatccctactacagcccaagcagccaaagaag  
tgtaaaagacgagaggtgtaaaactgcatattggaagattaatcgcccaaaataacatgagcggccacaatattataagctctctcttacccttgaacaaatctgaacc  
ctcattagcagattcgtttcagctggttccctgatcaactagaggttaccaggaaccatgcatagcactgaaatagggaaccgccgaatacaccagctacacctaa  
catgtgaaatgatgcataaggtatgctcctggaatacaatcataaagggtgaaagaccagataatcctaaaggcataccatcagaaactccttgacca  
atagggtaaatcaagaaaacagcagtagcagctgcaacagggagctgaatagcaacagcaatcaaggacgcataccagacggaactcagttccactcag  
accataatacaagctacaccaagtaagaaggtgtagaacaattagctcataaaggaccgcatgtataaccactatcaacagatgcagcttcccaattgggtaaa  
agtgcactccgctgcccagagaatggaataatggcaccagataaattgttccgtaaaagtaaaagcaaaacagagctcagaaactcaatcctact  
ggagggcgacgcatgaaaggcgaataaatacagaaggtgcggtcaataaggttagggatcacaacaccgaacctccgatgtaaagcggtttctggtcga  
gttatccagttgcagaagcgacccacaggcttcttctcgtctcttaaaattgcagctcatggtgaatcttggttattcaaatgcaagactcccaagcagac  
gtattaactgaaagataatagaagcgttatttaacagtataatagactatataccaatgtcaaccaagccagccccgacagttgtatatacacaacaaat  
accaaaccaaaaaatttgaatgaagtgagtgaaaaatcaaaactcagattgctcttcttagtttccataggggtgccccgggactcgaaccgggaactagtcgg  
atggagtagataatttctctgttacaatagagaaaaactctccccaaatcgtcttgcattttcattgcacacgacttccctatgtagaataaggctatttctatcc  
gaagagggaagctactaatttttagtagtaaggtgattcacttacttattatagtagacagaaacttcagaatgaaactgtgaaagtttaccctgacttattca  
tcttctagtttattgtttgtaaatgattaatagaggattcaccagatcattgatacggagaatatacacaataacgctcactgtgcgacccaggaaga  
aaagtaagttgtttggcgaacatcaagaaaaactgctcttctcgtaaaaaattcttcaaaaatccgaaccaaccattgcataaaagctcgtaccgtcttt  
atgtttacgactaaagttctagcagatgaaagtcgaagtatacttttagtcgatacaaaagcttctttttgaaagatccactgtgataatgaaagatttctacatacc  
gaccaaacgatacaagaatcccaatccgataatcgttcaaatggttactaataaggatgccccgatccagtaaaaattgggcttttgctaaagatccaatga  
gaggagtaaacaggactttggtatcgaattttcatttgatgatctattagaatgaattctccagcatttgattccttactaacaagaattattggtacactgaaaagt  
acccagaaaaatcgaagcaaggttttcaattggttagatgatccttgcggttagtccaaaaagagaaagaatattgccacaacggacaaggtaacattcc  
atttcttctcaaaaagaaggttctttgatgcaagaattgccttctctgatacgaacataatgcataaggggatccataacgaacctatggtttccgaaaaaag  
cagggtacattaacccaaatgttccatcttccatagaaaagatgattcgtccagaaggttccggaagaaagttaacgcaagcaagaagattgttacgaagaaca  
acaagaaaaatcattctgatacataagagtataataggaaccgaaatagcttttttcttttcaaaaataaaatggaattcattgaaatgaaactatcccaatt  
cgagtagtagtgagaagaatcgaataaatgcaagatggaacatcttggatccggtattgaaaggattgaaagcaagataccaaatggatagatagggtattt  
ctatattgctagataatgtaagtgcataaattgtcttcaaaaaaggaaatattgaaatgaaatagatcgtaaatctgaaacttggatttcttcttccggacaagact  
gttctgtagcagaaatgggatttctacaacgacgcaacccccagatagaatctgagaataaaactcagaataaaaaaattgtgtaactcaataatcgtatg  
gttaggatgattaacaaatcaaaaattctgctgatactcgaatcattaaccgtttcacaagtagtgaactaaattctgttattagaaccaataattcgaaa  
gttcggaaccattatccataatcatggcacaacataaatgactcctgaaagagtagtgggtagacgaataattgcttaggaaatgaaattttctgaataacct  
cgaattttccattgtatttctactgaaatcagagagagaaatattctcggttatcaaatggtgatacatagtaaatatgtagaagcaggggtgtgcaatttfaat  
acaacccctggggaagaaaaggagctaatccacggatctttccgctcttttcccaattgtttatggttcttaattcaaaaagagaaacaaatccttattttt  
caggccaattgctctttgactttgggatacagctctttatcaatatactgcttttcaacatcaatccataacatcctttcaatcaaaaatcaagaataatgagattc  
taaaaaaaagaaaagaaaatcaaaaggctactcctataggaaaacagcttttccctacatcagcactaatctatttttaacgtcctaattagatcagggaggtctcca  
attaagaagttagctgttctttttaccagaattggagccagctctatccattattcattagaccagaaaaatcagaattttttattccattcaaaaatccaaa  
ataagaattgattttattacgactgctatttttccattcattaccctgagggatcagtcggtcttatagacttaccagagctgtgacgaatttttctctatccaaa  
tgtgtaaaagatcatagtcgacttaaaagccgagctctaccattgagttgcaacccagataaaactagatcttagatagatcgaatccaaaaatcaatggaat  
tacaccgcacaccctgtcaaaatcttaaaatagcaagacataaaagaaagattttatcaccattgaaaacactcagatacaaaaaggaaacgggtctgtttaaatttc  
actaaagttaaaagtgcaccaatcagatcgtaaaattgtcattttttagcatttttatttaataataaataaataatctgtatgagagtaacaagaaggagcaaccc  
taccatttgacaaagttaggcaaaaaactaataaggagtgaggataaaagacttatcctacataaaatctagatgttcaatggacctttgcaatggaataca  
atgtaagaaaaaattagatgaaaaactcaaaaaataaaggcttatgttggattggcacgacataaatccagcaaaaataggatgaaagaggcaaaatf  
tcaaatagttagacaacaaggatactagtgagcctctcctagttttttattcatttagtctcaatfaactcaaaagtcttttctttttaaagaattccgcttcttaaa  
atatcagaactgttctgtaggttgagcaccctttcaaggaaatagagaatagctggcaacttaacaagtttgattctttatcggatcaaaaactcacttttcgaa  
gatctctctctctcgtagatcgaacatcaattgcacgattcagatagacagctattgggatagatgtagataaacaagccccctagaacgtatagagggtt  
tctctcatacggctcagaatattgactgtcatttaattcgtacagaaaaacaatctatttatactcatgactcaaggtgactaattttgattgacagactgaaagaa  
aaaaatccttgaattttttagctgtcttcaacttttcttgcctcctcgaacaaatcacttttattccttaccggtccaatctattgttgagacagttgaaatc  
gtgttactgttcggaaatccttattttgattgtgaaatcctgggtttaaacttctcgggaattctattcttttttcaaaaagagtagcaacatacccttttctt

atftccttcgataaagcatttccctcttctatagaatcgaatagagcgattgattctgatagacttfaatcaaaagagtttccatacttccaaaatggactttctctt  
atftaaccttttgatttctatatttctgatttctatataagggtagaatgacaaagtggcctaatttattagtttccactaacctgatttcccttgataaaaaataat  
tctgtcctctcgactccatcgtgactatttacttagcttactacaacaaccagcgaatcgggtcgggacgaatagaacagactatgctgagccaagagcat  
ttcattactatggaaaatggtgtagcgaatccacaatcgcgcttcaagtcgacgttcttaccacatcgttttaaacgaagtttaacataacattcct  
ctaatttcattgcaaaagtgtataggaatgatccaatagggatggaatcatgaatagtcattagtttctgttttataactaaactgctttgctatctatggagaa  
atatgaataaaaagaatgatttctcgggaaagactccgcaagagccaatttattaaaccatattctatcatatgaatgaaatagttcgaaaaaagggaata  
aacaagttgcttaagacttatttattggaattccatctcaacagaggactcgagatgatcaatccaatcctgaaatgataagagaagaatgacttcttccaca  
aataaactatcaacctcccgttaataatftaataatatttagattagcaatcattttccataaccattttccgtaacaaaactaattaaactaactagttaaactattgc  
aatgaaaagaaagtttttgtagttatagaattatcgtatttctcgaactcaacaaagaagaaaaaatgaagtaaaaaaacgacttctgtaaaagtaaaat  
taaggcttttgctttacttattttctttacataaaagaacactccaaatcaaaatgaatccattctatcaacgagcagttcttattctttaccggatggaatc  
tctgataatftaaaaaacgagcagcgttttccgtaacaaagaagaaaaagaaggaacctttttactaataaaactataaaaaaaatftatctctat  
cataaactatcttaccataaaggaataggtctcgttttatacaatgttctacgtcaagttfaaaatftttcatgaaaaaaagatttcaatttgactggactgacactg  
gattatgtttctgagacagaatgaacgcatttaggactgcatcgaatcaaggttataagaagaaaaaatctttaaataactttatgtctcgtgcagaatacaat  
acgatttcatcttctgttccatcagaaaaatctgggacggaagattcgaacctccgagtaacgggacaaaaccgctgccttaccactggccacgccccattt  
gggtttatgcgacactaataacagatatttttttcttattcgtcaatcctactcaatacaaaaaatggggggtattcttctgttaggacttagacatgcgaata  
tatagaatcaaaaaatgactgattcattatggaatctatfaagatattatagaagtcgaatcttccactctcattgagagtcgaatacaagaggtattttgt  
gtttgggaaagtcggaagaaaaaggtttgaaactccttttctttcccttagaaaaaactcaatcaaaatcaatctactctacaagaacgaacgctgtgt  
tatgctaataacttagtttaacctgtattgttttaactctgtattatccgactgattttctcgcctaaatgcccgaagcttatgcgatttcaaccaatcgtggattta  
tgcctgcaatactgactctttttctattagcctttgttgcaagctcgtgaagtttctgtagaatttctgtagaatttctactctgctcgcctaaatgaaatcttcaaaa  
aaattcgaaaaaatgataagagccgagaagcttattatgaaccttctgattctaaaatcaaaatcttctacattgaatgtatagctgcagcaataaattggatcagcc  
tttactcctcgtactcagttgagcaggtatcttagtaaccgcaatacctaacctaatatttataagagtgcttattataaactaattctgcaattttttcaaaa  
attgattttgcaatttttaggtgtcaaaaatacaaaaaccatcctagttggtgtgtgtaaggaaaaacgggtaacttattccttaaaaaaatctggagattatgta  
atgcttactctcaaacctttttgttatacagtagtgatattctttgttcccttttattcttggattcttataatgatccaggacgtaactcctggcgtgacgagtaaaatc  
caaaatftttctfacaatggattgttcaatacttctacgagaaaatccgggggtcagaatcctccaatcgaagtcaccaacgatccgagggggcggaa  
agagaggggattcgaacctcgttacaaaaaattgtacaacggaatagcaatccgccgttttagtccactcagccatctcctccgttcaaatcgaaggtttcgt  
gatagacagaggaagaataacgattgcaaaaaatcctcttttttcaaaagtcaaaaaatatttgaatccattttgattatctttttctaatgttaat  
aaaaaaagaagaaaaatcttcttttcttaattcaaaatggatattgctaaaagacaatcagatagatttctctcagcaggcatttccatagactgttata  
ataaaacaagcaggtatagaaaaaactcttttttattattatcaaaaagcaaaaaggggtctatcaaaccaaccaccataaaatggaaagaaagataaa  
gaagtgagactgactccttgaatgagcctctatccgctattctgatataaaatcagatgagatgaaatgtataagtgattttttgtatttcttagacttagaccac  
gcaaggcaagaatttctgctatttactatttctatattctgtfactagatgtctataggaataagaagaaatcgaacccttccgctacacataaaatggatttca  
aagtcatttttctttcaatactttactttttcagaatcctattttgttcttataccatgcaatagagagcaggtgggaaaaagagaggtacttttttctttccctaa  
aaaataggcttcttgaaataggaatcatggaataatcctgaattccaatgtttttctatagataaagaactaattgaatcaaatcatggatttaccacgacctc  
ggctgtgacccatagataaaatgcaaaatcttctcagaccattgaaaaagcattgaacgagaaaaatcgtccacagataatctatctgtatccttggga  
agtataaaggtgctcgaatggtgaagtaattgaataggagatcactatgactatagcccttggtagagttactaaagaagaaatgatttattgatattatgg  
acgactggttacgaaggaccgtttgtttgtgagatggtctgacctattgttcttctgtcttattcgttttaggaggtgtgttacagggacaactttgtaacttc  
ttggtataccatggaltgagcttctatttgaaggttcaatttcaaccgacgagttccaccctgccaatagtttagcacactttgttctactatggggc  
ccggaagcacaaggggatttactgttgtgtcaatfaggtgctgtggactttgttctcctcagggcttttgcactaatagtttcatgttacgcaatttgaact  
tctcgtctgttcaattgcgcttataatgcaatttacttctgcccactcgtgtttttgttccgatttctgatttaccactgggcaatccggttcttctg  
ccgagtttggcgtagcagcgaatctccttcttcaaggattcataatggagcttgaaccattcattatgatggaggttccggaggtattagggcgcg  
gctctgctatgcgctattcatgggcaaccgtgaaaacacttattgaggacggtgatggtgcaaatcttccgctttaaaccactcaagctgaagaaact  
tattcaatgtcaccgtaatcgttttggcccaatcttgggtgttcttttcaataaacgttgggtacatttcttattgctatttaccggctaccggttattgagatgag  
tctattggcgtatgctggcctgacctgaacctcgtcctatgacttctgttccaggaaatccgtgcagcggaaatcctgaaatftgagactttctacacaaaaat  
attctttaaacgagggtattcgtcgtggaatggcagctcagatcagccctatgaaaaatcttattccctgaggaggttctaccacgtggaacgctttaaagtaa  
ctttgttttagctgtcgtgaccaagaaccaccggtttgttgggtggccgggaatgccagacttatcaattgtcgggtaactacttggagctcagtagccat  
gcagattaatcgtatttggccggagcaatgaacctatttgaagtgcccaatttctgaccagaaaaaccatgtatgaacaagggttatttacttccgacttag  
ctacttaggttgggagtagggccgggagaaatcttagatactttccgtactttgtatctggagacttctatcaatttctccgagcttaggttccggtggca  
ttatcacgcgcttctgggaccggagactcttgaagaatctttccattcttggttatgtgtgaaagafagaataaaatgactacaatttgggtattcacctaatttgt  
taggtataggtccttcttagtactcaagctcttttttggcgttatatagatactgggctcctgggggagagatgaaagaaaaatccaatttacccttag  
ccccggtttatatttggttattactaaaaatcccccttttggggagaggggttggattttaggtgtgagattagaagataaattggggacatgtatgttgggtt  
atttgtatttggcgaatttggcatacttaacaaacccttccatgggctcgcctgctcattttagtggcttggagaagcttactgtcttattagtttagcgtttatct  
gtcttggtttactcgttgttttctgtgttcaataacagcttaccgagtgagttttaggacctactggccagaagcttcaagctcaagcatttactttttagt  
tagagatcagcgtctggagctaatgtggatctgccaagaccacaggtttagttaaatactaatgctgttccccaacgggagaggtatttttggaggggaaa  
ctatgcttttgggaccttctgctccatggttagaaccttaagggccccaacggttggactttagtaggttgaaaaaagacatacaaccttggcaagaacgac  
gttcggcagaatataagccatgctccttaggctctttaaattctgtgggtggcgtagctaccgagatcaatgcagttaatattgttctcctagaaggtttagcagc  
ttccattttgttctagatttcttttttgggcccatttggcagcaggaagagccccggctgctgcagcaggttgaaggaatcagctgtgatttggagc  
ctgttcttcatgacccctttaaactaagatttctatttatacctgttctactgtttttctgtctgctcgttattctatctagccgagccattccttctatgaaa

aaagafaaggggacagaacaaaaaaacaaataaagaacaacgfatcaatcgcaaaagaaaagagaggaaaggagagagggattcga  
accctcgatagttcctaagaactataccggtttcaagaccggagctatcaaccactcgccatctctccacagcctaactcttattttcctacaatagaacatagcc  
atacgaatgactactaactctagaacatctcaatacaaatccctttcgatataatttctgtatactgtatccatgtatacagatccgctataccgctgtgaaata  
aagcataaaacccccctaacccatatacaataaaaaaaagtggtgagtaaaagtfttaagagagaagaatcaatggattcatgataaacccccctactctgtatft  
tattacaatttgattaaagtgagggatcaataataatgtagtcaactttatgtggaactggaggattagaataatgactattgcttccaattagctgttttgatta  
attgtgacttccctcagcttagtcaattgtagtaccctgtatftgctctcctgatggtggtcaaacataaaaaacgtgtatftccggtagatcattatggattggactgg  
tcttctgtagctattcctaattctctcatttctaataatggtttagtatttagtagccgatacaaaaaaaaaggccgtttattcggattgtgagacgcattaaaaatgc  
aatttgcgccccgaattgattgacagacaataaataaaaaagaaaactcaaatagaaaatgaaacggctgaccagacatagacggctgaccagggcgata  
taccctataaaaatagtagcgtagcgtagcttaatggttaaacatctccttccaaaggagaaatgacgggttgattcccgccgctcggcagcttaatttagta  
aggtagctatgataaaaaattagtctacttftttaaagaataagtggttagctagtagctacccttactatcttagcccccttgcaccctcaaaaaagagca  
ctacagcggcggaatcaactggcaacagggttccctaaaccggggattaccgaaacaaacaccagcaaacagctfttaagggaaggagatagactg  
tgcctttctcatttatttttcttcttcaaggtaggggcttggaggctctctgtgtagcaagtacttgcacacctgctcaatftggcctatagggtcgggaact  
aatgaataaaaaagggttgataccgcccaaccaccagccctctaccatactagacaataagaatgctctttatagactgtaagtgccggagacgggaatcg  
aacccgtgacctcaaggttagcctcgtgagctacaaactgctctactccgctctggagcgtggaaccgggtggcgaaaaagggtgaatacaatcaggc  
ctctaccatgctagacaataagaatgattttatagaaatggagcgggtagcgggaatcgaaccgcatcgttagctggagggctaggggtatagtgacgt  
tgggtgattattaaactgctctaaatcaaaaccgaacatgaatfttgaattcattccgctctttaggttattcaccactaaacatcaatcagcttfttctgctgaatg  
gaaccaaggctctctgcttctagtagatccctaaagagtaggagatagaattttgcctaaatctatcaatcaactactgttccctaaattcaatgaagatcctgag  
gaaaagaattgggttccaccgagctgaacaatgctgaggtctagtaaaccaaacatccgctttagctatttggcttccatttccctttaaacaagaagatt  
tagttacgattggaaaataaaatttttgaatcctcatagatccttactcatattttaaattggaaaccttaactcaatgcaaaaatgatgctcgcgactgtagctata  
atcacaatcctatttgggtgagcaattcaatgcttgggtacaatcgcgaaaatgcatattctcctcaatgctattgagagaaaaaggagtaaatccttct  
aagaactaaagtttctcggaaatataaaaaacctaaggacgccttaagtatactcaaatcagttataatgaacgaatcacactttaccactaaactatacc  
gctacatgtaaaactgatacaacgctacccttctcaaggtagccttccgagaagaatgtaattccctcttagttaatgaacagagaaggctcctcaggttagc  
agttggtagctcgcgggcttcttacttcttcttcttcttcttcttcttcttcttcttcttcttcttcttcttcttcttcttcttcttcttcttcttcttct  
gagaaagagtgagatgttttttattatcatagacttccctatggcttggagaacaaataaacttaagaaaaaggcacatagggcgaaggattacttga  
tgaagaagatctgaatgctctctgtagctctcttcttcttcttcttcttcttcttcttcttcttcttcttcttcttcttcttcttcttcttcttcttctt  
gaatagaactaagaacacacaaaaagagcatatagcccggagaccattacaaaagtcttcccaataatcatattgggtatctgttccctcttcttcttcttctt  
ggggcatggttgattttccatataccatcgaacctaaagggttccagaacctcttcttcttcttcttcttcttcttcttcttcttcttcttcttcttctt  
aattctactgcccgtttacagaaaattgggtataaaactccactacagtttcttcttcttcttcttcttcttcttcttcttcttcttcttcttcttctt  
tattctaaagagaagggtactctgctaaaatcgttcaacaatccgcttaagaaaatggaaagtgtgaactgaagggttcccaagggtgctgttaaaaatt  
gtttcaacctctacaaaacagacaagaatgatatcactgaaaatataaccagccataggggtatgaaggcgcgaaatcgtttatacccccaacttagag  
gaaataaaacataaattggagaagttttcatgataagatcagccaatagaagaaaaagtccttaattttcagaccgttctgagcatgtgaaaagcaatagcctaaa  
gataaaaaacccctacttctgcaagtgataagagagaatagaagattttcttcttcttcttcttcttcttcttcttcttcttcttcttcttcttcttct  
gatataacagataatgtacattatggagtagacctataatggaaatgaaagtggtaattttgaaatgaataagaagcccttttaactcagtgtagatgaatgc  
catggttaaggcataagctcgggtcaaatccgataaagggttttactttagtggtagagtaatgccgcggaagacgtgagcagtggttcaaatccgatacag  
actttctactaaatcattcacttcttcttcttcttcttcttcttcttcttcttcttcttcttcttcttcttcttcttcttcttcttcttcttcttcttct  
gggtgtaaatccaaaaagaaatggactcttcttcttcttcttcttcttcttcttcttcttcttcttcttcttcttcttcttcttcttcttcttcttct  
ttataaacgaattccctaaaaagtaggggatgaccgtgaatcaactaaccatcaactaaaaaaaccttcaaaaagcataatggaaaagtaggaaggactcct  
gctttggatctagtatactcttgagtattgacaattcaaaaaactgctcactatcattatagtaataaggagcgggtgtataccgccctatcgtctagtgatgc  
ccctatcgtctagtggttcaggacatctcttcttcaaggaggcagcggggtccttccctggggtagggagtattgaaaagggttaatcatagattatca  
aaaacctagaataaattctctgggtcgtgccggagcgggttaattggggacggactgtaaattcgtgacaatagctacgctgttcaaatccagctcggccca  
aaaatctaggccttctgtaatatgagttaatcatttttttcttcaaaaaagaaatattgattcagataaaaagaaataaaaagaaaggggaa  
tatcttctaatctatcttcttcttcttcttcttcttcttcttcttcttcttcttcttcttcttcttcttcttcttcttcttcttcttcttcttcttct  
ttatgctacttctactataccccatagatcgggggtatgtagtataatgattcgtctatttcttagagtaggacagggcaatattcttattcttaggttcc  
agtatgccatacggccgggtgattgtagtcaattgctcagagaccgcttctcaaggcggaggctcgggttcgagccccgctagtcgccgaactagggtt  
aatgaatggagaattcatttcttcttcttcttcttcttcttcttcttcttcttcttcttcttcttcttcttcttcttcttcttcttcttcttcttct  
taaagagaggagagataggaattttttatcactactcttcttcttcttcttcttcttcttcttcttcttcttcttcttcttcttcttcttcttcttct  
catgaattgattgagatccgatattcataaattgaattgattcagattatcagaatgcaagtcctccctgaatttacaggatacccttcttcttcttcttctt  
catcccagttattgcaaaaaaaagaggttatggaagcaatattctcgtattattgctactgatttcttcttcttcttcttcttcttcttcttcttcttct  
cagtcagccaaaatgattaattggaagtcaatattcattgaagaatgaaaaggattataaaaaataaaatcaagtcttaaatgaaaggatccgttggaaac  
ataaagtggtgtagaaaaaactacatagtttttctaccacacttagagcttcttcttcttcttcttcttcttcttcttcttcttcttcttcttcttct  
tcaatttcttcttcttcttcttcttcttcttcttcttcttcttcttcttcttcttcttcttcttcttcttcttcttcttcttcttcttcttcttct  
taaaggaaaaaacccagcgaatcttcttcttcttcttcttcttcttcttcttcttcttcttcttcttcttcttcttcttcttcttcttcttcttct  
atgaaaaatgctcgtatgttgggaatgctccgaggaagaaatcaaaagttcttagatagaactttttaaaccatggctccttcttagtagcattatgaattgct  
caccgcttcttcttcttcttcttcttcttcttcttcttcttcttcttcttcttcttcttcttcttcttcttcttcttcttcttcttcttcttcttct  
ggagtgaaacaaaataaaagaagaagaataaagttcggcaaatgattaatgcaaacgctcaattaaagaaaaggattgatacaaacattcactactc  
aatcaattagtagtaccctagagctcctcctccatactactagtgaaaagagaaatgtaaaagactaccattaaagcagcccaaggagacttactatccatg

taaattatgtctcttattctatgaaggaaatttctactattgatgaataatcatagtagaatcaagggtacagagtcacaaagggttctgacctaaggctatggatga  
atcagttcaaaagaatttacttcaaaaattcttagagtttctggtagaattggggagcattaagfataaataatgatacatagcccttcttattaataaaagaataagga  
aacgctatctcatccctattggtatcgggttggccactactgctaaaacaaccaccggttggagaaagaacgggtggttctcaaaatccagatc gccagccttgg  
tattcttggcccaacttatgggggtgcaaatgttcgatttggatcagactataagcctaagttttatgatcaggcggcaccagattgaaactggggataaag  
gatttgcagtcacctgcttaccgctggccatgccgcaaaaaatc gatc taaaatcgagaaaagcaagtaftcatccagtttctactaaaactaaccttcttt  
atctaaatctaattctacttactttttccaatctttttcaaaaatctattcatgcttttttggatccagtttcgattattctctcaagattctatctaaaacacacattgct  
aacactagaaaactcccttttcttattgaaatgaaaaaggagaaaagtggatttctagtcacaagctacaaaattaagaacaaaattggaaccattaactagaattct  
cttttattttgaaattcggatttctccccctgccatttaattggcataaaaaagacaatggatttatgctaatccgtatataggtaactccaggctccgaacagcatt  
attatctatggatcccccttatgtacatactctgtggagaatcgttcttaattttcattgcaataaatacttgaataaaaaaagaaaattgactttgctatgtggaggtc  
cagaactagattggcatgtacttaaaaaagtaacttatttttaggattctacaacgaaatcttatcttataatgaaattctactactacgaaacaaaaaagaac  
cttcaaatctttttgaaattaaactaaagctgtctatttcaatcgaactaaagtcaaaccttctagtgcttataaattatattttggtttatccattcatagaaggaga  
aaaaatgagaatcttccgctcaatctaagaatacataaactgtaagtgccagaatfttttcgaggttctaggaaatgtttatcacttcttccattccattggaccc  
ctgggaaatcgaacttctgtgaaattgtcttattcataatgatgaaatacatatgaaatacgtatgtggagttcccagaaattcatgtgatgtaaacagaat  
agattccataattgtagatcgtatgtgggattgatgaagagtgagctgataatggaatftttctc gataaacaggaaacttaagattaagatgctccggaaatggaa  
atgagggaatgtccacaataaccggattttagcagatccaatcaggggattttgtaggttcattaatcaaggcttggcagaagaacttgagaagttccaacaattaa  
agatccagatcacgaaatcttcaattatttgcgaaaggataatgctagaaccttcgataaaagaaaaggatgctgtgatgaatcactacacattctccga  
attatagatccgcgcgattaattttggttcgatgtgcaaaaagcaaaccttctattgaaacattctataatgaaactcttaggaactttataataaatggaatata  
ccgaaatgtgatcaatcaaatgtaagctctggtatttactaccgctcggaaatagaccataaaagaaatctatctacaccggactataatcagattggggag  
gaagatcggaaatgcaattgataaaaaaagaaggatagggctcgcgtgagtagaaaacaaaagatattcttagtctatcagctatgggttcaaatctaaa  
agaaattctagataatgttccctaccctgaaatfttctgtcttccctaagtctaaaggagaagaaggattgagtcacaaagaaaagcattttggagtttatcaaca  
ttgcttgttaggtgggacctggtatttccgaaatcttatgtgaggaattcaaaaagaaatftttcaacaaaaatgtgaattaggaaggattggtc gacgaaatag  
aatcgaagactgaaatctgatatacctcagaacagcaccttctgttaccgagatgattggccgctacggatcattgattggaatgaaatggaaacgggtatact  
tgacgatgacgatgaatcactgaaaaataaacgtattcgttcgggtcggatctgttacaagatcaatcggactgctctgtgctgttacaacatgcggttcaaa  
aaactatccgtagagtattcatacgtcaatcaaaaccgactccacaactttggtaactccaactcaaccctgattttattaataactactacgagaccttcttggtag  
atattcccttatctcaagttttgatcaaaccaatccattgacacaaacgggtcattggcgaagtgagttgtttgggtcctggaggattgacggggagaactgcaagt  
ttcggagccgagatattccagtgactactggtcgtatttgcactgacacgtccgaaggaaatcaacgttggactactggtatttagctattcatcgagaat  
tgatcattggtgggatccgtagagagtcattttatgaaatctgagaaaagcaaaagaaaaaagagagacaggtgtttattatcacaataagatgagta  
ttatgatagcagcaggaaattcttgccttgaatcgggtattcaggaagaacaggttgtccagctagataccgcaagaattctgactattgcatgggaacag  
attcatgtagaagattttcttccaatattttctattgggggttctctatcttcttattgagcataatgatcgaatcgaagcttfaatgatttcaatgacagcgc  
gcagttccgcttctcggctcggagaagtgcattgttgaactggattggaacgcaaacagctctagattcaggggttctgttatagccgaacgcgagggaaagat  
catttctactaataatgcacaagatcctttatcaagtagtgggaagactataagattctttagttaccatcggcgtctcaacaaaatactttagtgcacaaaaaact  
cgggttccgcgggttaaatccataaaaaagacaaatfttagcggagggggctgctacggttgggtggggaacttgccttaggaaaaaacgtattagtagcttat  
gcatgggaaggttacaatttgaagacgcagatattaattagcgaacgttggatataatgagatatttatacttctttccatccgaaaatagaaatcagacgggatac  
aacaagccaaggtccgctgaaaaaacactaaagaataccacatctagaagaacatttactccgcaatttgatagaatggagttgtgaattgggtcctggg  
tagaaacagcgcgatatttagtaggtaaaatcgcctcagatagcgcgaatcgtctatagcggaaagctggattattacggccatatttggctttaggtatc  
cacttcaaaagaacttctcaaacactaccgataggtggaagagcgcgttactgatgtgaaatgatccagaggatccctc gacataatgttctgtatata  
ttcaaaaaagcgaatcaaaatggggataaagtagccggaagacacgggaataaggggatcatttccaaaatttgcctaggaagatagccctatttgaag  
atggaacgcctgtttagatgtttcaatcccttaggagtagccctccgaatgaatgtggacaataatgaaagctcgtcggattagcaggggatctgctaaa  
aacattatagaatagcaccctttagagagatagcaagaggttcaagaaaactgtgtttcagaattatagaagccagtaaaacaaaaaataccgtggg  
tatttgaaccgagtagccgggaaaaagcagaatattttaggaagaacaggagacccctcgaacagcctgttctaatagggaagctctatcttaaaatattc  
ataagttgatgagaaaatccacggacgctctactggccctattcacttcttactacaacaaccggttagaggaaagcgaaggggacaacgaatagga  
gaaatggaagtttggccttagaaggaattgtgtctcattttacaagagatacttataaactgatcacttataagctcgcgaagaataactaacgctacgat  
ctggggaaaaacgagtagcctaatacagaggatcctccagaatctttcagtgcttctc gagaactacgatcttggctcagaactgaaccatttctgtatctcaga  
agaaactccaggttaataggaagaattgatcggaaataatataaattcttcttatttctattttatgattgaccaataaataacatcaacaacttcaaatggactggtt  
cccccaacaaaataaaggcttgggtaacaaaacactacctaattggggaagtcgttggcgaagtcacaaggccctccactttcattataaaaccgataaacgaa  
aaagatgattgttttgcgaagaatcttggaccataaaaaagcgaatfttgccttgggaaattctcagcgcgagcggagctgaaaacgaagacgaaagattttgc  
caaaaatcgggagtagaattgttattctggatacgaagatacaaatgggatacacaactcgcattgctccgtagctcatgtgtgtattttaaagggttctctag  
ttatacgcgaaatctttgataaacccttaagaaatggagggcctagtatagcgtatttcttcttggtagccagtgctaaaaaaccaacttcttaccgattacga  
ggtttattcaggatgaaatctcctgtaaccatagcatttcccccttttttaccaggctttacaacattc gaaatcgggaaattgcgacaggagcaggtgct  
attagagaacaattagcagatttggatttgcgaattatttagaattctcgtcgaatggaaggaaatgaaagacgaggggtatagtgagatgaaatgggaagat  
agaaaaagacgaataagaaaagtttttgattagacgcattgctcgaacattttatcaacaaatgtagaaccaaatggatggtttgtcttattaccgatt  
cttctcccgaatfaagaccattgtttataggtctgggataaagtagtactcggatattatgaactttataagagattaccgctcgaacaacaactctgcttat  
ctataaaaaagagtgaaatgagccagcagatttagtaattgctccagaaaatgtgacaagaagccgtggatacacttcttagatgtgggtcccgcgggcaacc  
aacgagggatggtcacaataaagtatacaaatcacttccagatgtaattgaaaggtaaagaggggaggttctc gcaaacctcgttgggaaacgggtc gattactgg  
ggcgttctgtcattgttgggtccttacttccattacatcaatgtgggttacctctagagatagcaataaagctttttagctatttgaattcgcgatttaacacgaaac  
gcgctacttcaatgttaggattgctaaaaagaaaatfttgggaaaaggaaaccattgtatgggaaatctcaagaagttatgaggggacatcctgtactgttgaatg



agcacctaccctgcatagattagcatacagcgtttccaaccactttagtagagggcgctactattgtttacaccattagtgtgtaaagggttcaatgcagacttga  
tgggatcaaatggctgttcatctacctttatccttggaaagctcaggggaaagctcgtttactatgttttcatatgaaatcctatctcccgtattggggatctattg  
cgtaccaaccaagacatgcttcatcggactttatgtattaacgattggaaccgtcagggatattgtgcaaatagatataatgttggaaactaaccaaaaaa  
gtaaaftacaataataataatcctaagtatacgaagataaagaatctcttttctagtctcatgatgactgggagcttatagacagaaacaaatctgttagacagtc  
ccttggctccgatgaaactagatcaacgcgtcattgggtaagagaaagttccgattgaaagttcaatagaaatcttgggacttatcgtgagattatgccactat  
ctagtagtgggaaatagaaaaagaaatccgttctatatacattcgcaccactctgtgcatatctttttatagagaaatagaggaagccatacaggaattatgca  
ggcctattcatacactatcfaaacaaggaagttagattcggggatgccctttcaggggcatccgatttcgctagatcatcattttgccgcacgaatccagattga  
gattgaggaaggaaggttaactaagttttcgaatcactgactcagccattgtcgaatcctactcagcaattgtcgaattatacagccgaaaaaggggacttat  
ttatggcggaacggccaatctggtcttcagaataaagagatagatggaaactgctatgaaacgacttattagcagattaatagatcattcggaaatgggatacactc  
ccatactggatcaataaaaaacgctgggcttccatcaagccactactacatcgaattcattaggaatcagagatctttaaacaatccctcaagggatgtagtcc  
aagatcgggaacaacagagatttcttttggaaaaacactattatfatggggctgtacacgcggttagaaaaattacgcaatccgttgaatctggtatgctacaagtga  
atattgaaacacgaaatgaatcgaattttcgataacagatccttcaatccagctctatcaatgtctttttcagggagctagaggaaatgcatcgcagggtacacaat  
agtaggtatcgcgaggaatggcggatcctcaaggacaaatgattgattacatcctcaagcaatcagcgaaggacttctttgacagaatataatctctgcta  
cggagcccgaagggtttagatgactgctgtacgaacggcgatgctggatcttacacgtagactgttgaagtagttcaacatattatgtcgtagaagaga  
ttgtgtagtactcgaagctatttctgtgagctcctcaaatgggatgacggaaaaactttttgacaacattaattgtcgtgtattagcaaacgatataatcgggtcac  
ggtgacttccactcgaatcaagatattggaattgggtagtaacgattcataaccactttcgaacacagccattcgaacacaaccaatataatagaacccc  
cttacttccggagcacatcttggatctgtcaattatgttagtgcggagttccactcatggcgaatcgttcgaattgggggagctgtaggtgtattgcgggcaat  
cattggggagccagggactcaactaagcaatattttcactgtgtggggtattcaggggggactcggacctgtacgatcccctcaaatgaaaaaac  
aatcaatggggatttgggtcaccacacgtaccctgcatggcagcctgtctttctatgttatatagacttgcataaactattcagagctgagatttctacataggt  
gactattcctcaaaaagcttgattcagtgcaaaaatgataaatatgtagaatccgaacaagtaattcgggagattcgtccggaactcggctttgcaattttaaagaaa  
aggtaaaaaacataatatttccgaatcagatgggaaatgcaactggagtagcgtttatcatcgcgccgaatcaaatggttaactctcgtcgaatcaaaaaac  
aagccattatgagattgtcagtaagtagtgcagagctagatagcttcttttctgctccacaaggaatcaaatgaaatcattcttcttctgttgcggaaggt  
atatttggcctctcagtgctgatgaggttaagacatagactgttgatacttttggtaaaaaagatagggaaattctgattattcaacgccggtcgaatcaggt  
ccaatggtcattggaatttctctatcttctattctcaaaaataatttggattgttagcgaaaaagcgaagaaataggttgcgcaatccattacagatcatcaagaacaa  
gagaaagaaccaatctcttgggatttccgattgaaataccctttatgggtgtttacgtagaanaactatagttgcttattttgacgaccacgatacaaaaaagata  
aaaagggttcaggaattgttaatttagatataggaccctagagacgaatataaggactcagagagaaagactcagagaacgaatcgggagcccagaaaacgaa  
tataggaccgagaggaagaatgtaaaacctagaagacgaatataggactcagagaggagatgaaacctagaagatgaataggatccagagaacgaatatagg  
aatatgaaacctagaagatgaataggaatcctagaggacgaatataggactcagagagggaatccgagacgaataggagtcagagaacaaatatagg  
ccccgagaggataaatatgacactttagaggaaactcagagacgaacatgggacttttagaggaaactcagaggaaactcagaggacgaatagggaacc  
cggaggaagattccgtcaaaaaagggggtttgattgagcactcgaagcaaaaaaagaatttagtcaaaaatacaaaaaagaagtagatcgttttttcttctcaca  
gaactcgaatcttccgagatcctatccctaaaggtacttgacaatagattattggagtgatcacaactcaaaaaatacaagaagtcggctgggtggttgg  
gttcgagtgagagaaaaaaagccatacggaaactaaaaatctttctggagatattcatttctgaaagggcggataagatattagggtgagtttgataccactag  
aaagagaaaaaaagattcgaaggaatcaaaaaaagggaaatgggtctatgttcagtgaaaaaaatttcaagagcaaggaagatttttgggttgcga  
cctgcagtcgctgatgaaatgaacgaaggagaaatfagcaacactttccacagatcctcgcaggaagagggttaactccaactcgaacttgaatfcttattc  
tcatgaaatagcaagtttaactcaagaatfatacagaatagcaatcgttcgaactgcttagtattgaaatgggaacaagaagaaaaagaggaggtcgtgct  
tccctgttgagataagcaaatggctgtattcgcgatttctaaagattgggtaatacaatcactatttctgatacagaaaaaggtatgatacagaagtgagg  
actgatttccataataggttagatcgcaccaatacaatccttttattccaaggcgaagattcaatcacttagccaacatcaagaagctattggtacctgttgaatc  
aaataagaatacaatctttagtgggttgcggcatcactgttctcgaattgggttttaagaattcaaaaatcccaatgggtaaaagaatcgaatcctagaat  
cctattcgaatatttgggctcttccgaatfctcgggactctaggtactattgcacatgataatcgaatfcttctactatttactaacgtataatcagatcctg  
ttaaaaaagcatttgccttgaacatttgaacaaaaactcagaactcgaagacttcaaacactcttataaataagaaatcaaaaggacttcaaatcgaatgata  
aatcgcacataaaaaaatcaggtcaaatfctcattgtaaatatagattcctttgtataagagcagctaaagccttatttggccactacaggcaactgttcatggtcatta  
tgggaaatcctttacaaggggataggttagttacgtttatatacgaaaaaagcagagatcagtagacataacgcaaggtcttcaaaaagtagaacaatctcgaagc  
gcgtcaattgattcactatcggcaatctcgaaggagaattgagattggaatgagcgtataccaagaattcttgggggtccttggggttcttattggaagctgag  
ttaacctagcccaagtcgtatcttgggttaataagatcgaagggttatcgtatccaagggttacagatccataatagacatagagattattatagccaaat  
aacatcaaaagtcggggttccgaagatggaatgtctaatgttttccactggggaatattgactattcgcagcagagcgcagcagggcgggcttggatgaatc  
gatctattatcggcaatctattgggaatacaagggttccctgaatacccaaggttcatatctgaagcaagtttcaagaaactcctcagattttagcaaaaagctgc  
cttacgaggtcgtattgattggtgaaaggcctgaaagaaaacgtatgttggggggattatactgttggtagccgattcaaaaattgtgcaccgttaccacaa  
gacaagaacctttattcgaatcaaaaaaaactatttgcgtcggaaatgagagataatttcttccatacagaattatttcttctgattctgacgtacaacaa  
ttctatgagacatcagaatcaccatttaccctattatgatitaaagatacataaagcagatttttactttaaactagattttgacctagAACgctaagaggttagatt  
tctatttttttaattttaaagaagtttagtaattcattaaaggttagcttatacattgtagaaggttccatcggaaacattattatttatttcaagctatttccgcttctt  
aatcttcgaaaaaagaagatttctgaatgaaaggtagatgaaaaaaaagaaaaatcaaaaggaaaggttggaaaaaatgacaagaagatattgaaacatca  
ttgaaagagatgatagaagcgggaggttctttgtcatggtattaaagaatgaaatcctaaatggcccttcatctcggcaagcgtaaaaggtactcatattaca  
aatctcgttagaacaccctgtttttatcagaagcttggatttagttttgatcagcaagcagggaaaaagcttcttaattgttggaccaaaaaaagcagcggga  
tttagtagcatcagctgcaataagggtcgttgcattatgttaaaaaaggttgcagtggtatgtaaacgaattgtcgaattactaaactagactttctcaatttagag  
actaaagcagaagaaagatggaaaaatccaccatctccaaaaagagatgtggcaatcttgaagagaaaattactaccttcaagatattcggcgggact

aaatatatgacgaggtgctgacattgtatcgtctc gatcagcaaaaagatataagctctcgggaatgtccatttggggattcctactatttcttagccgat  
acaattgtgaccagatctcgcgaatatac gattccagccaacgatgacactatgacttcaattcgattgattcctaacaattagatttgaatttggaggccgtt  
ctctctatataa gaaatcattgattaagaagaatgtaattcttgggcaactcgtatgatttgaatcactactattcttttggtttgcata gaaaaagacgggga  
atattgatataatfagagggtattgatatatattatcatctgatgtgatttctgatacctaaataa gattaatactcacgttctgagttgagaaaaagatggtgaat  
caaaagaattcttttgaagttcattttatcaggggacaatatgaatattatacctgttccattaaaactcaaggggttacgatatacggcgtagaagtag  
gccaacacttctattgcaaataggagggttccaattcatgccaaacttatcacttctgggtcgaattactatcttctaggttcagttatcatagctgttcgcaat  
ccacaaccattccaaccgatgtgcagaatttctcgaatatgtccttgagttattcgaacttaagcaaaactcagattggagaagaatcacgggtccctgggtccctt  
tattggaactatgttcccttttttggttcgaactgtcgggtcttacccttggaaaattatacagttaccctgggagaattagcagcggccacgaatgatataaa  
tactactgttcttagctttactcacgctcagcggcatattttatcggggtcttagcaaaaaaggattgattttcga gaaatataatfaaaccaactccaatccctttacc  
aataacatattagaagattcacaaccattatcgcttagtttgcactttcgggaatataatggcggatgaattagctgttgttcttctttagtcccttagtag  
ttctataaccggtcatgttcttggattattacaagcggattcaagctctattttgcaacgttagccgcaacgtatataaggtgaatccatggagggtcatcattgaatt  
gactagtttcaaaaatgcttttttagcttaactcaattcatgcatgttgcggaaaattcgttgggttggaaaacaaaatgtagaattgctgatatacaaatcta  
gagttgtagaagagagaataggctataatfaggaaltgccaaacaaagtatagccattaggggggcggagtcaggctagatctatctttagtataaggt  
cagtcactttttagtgagggttccacttaaggaatttttgaatccgattcaatagaaaatgagaaaaacacaacaaaataga gaaacaaatgataggatatt  
atatafcccaagtagattcattactaactcgatataatggaatcggattccataccaattcagtcagcattattgtagaattgtagatttcaattcctattggatc  
tggattaggctgattccatagggttcttcttattcacttttattatgaatagatagatggggaaaaaatagaaccaaggatatacgaagaggaagaaagaa  
ggatggaatgaaagatcagttggttggaaagaaagagaataatgagtacaaaactctaatgattgaaactaaaaaggagatcgaagcagttcggaa  
gaattcagattatcgttcaattgtacttttagtactctgtccaatagactgaatataatgaaattcttgggtgattgtagcttaaccatttctttttgacacgaggaa  
ctcatatgaatccactaaattgctgcttccgttattgtctggttggccgtaggttggcttcttattggcctggagttggtaaccaggtactcagacaaagct  
tagaagggtattgcgagacagccagaagcagaaggtaaaatcgcggtactttattgcttagctagctttttaggaagctttaaacaattatggactagttgtggcact  
ggcgttttattgcaacccttttgaatcctaaaaagaaaacgagctcttagattagatacttcttcttttttagtaaatggatttcttctgcaatccaattat  
caatacttactcctaatttactcctagattttctattatggggacagacaatccccaccagggaatagctgatttggagatcaatfagagatattgctg  
ccgtcttctcccggcctttgttagggcagtggaagatttttctttttaggaatttgggaacattcaacaaggaggtcttccaggtcaaacgagatcta  
agactaatcaaaa gaaactactaaattgaatctatttctataaaaaaaatgcataaaaaacccgatcaaaaaggcggagcgaagtaagtagcaaaaaacttgt  
tctttgtcgtctatcataagaggagacatagaaaaatgaaccacttcttcttttttagctcactggccatccgctgggagttcgggcttaataccgataattta  
gcaacaactcaataaactaactgtagtgggtgtattgatttttggaaaggagtggtgctgagttgctattcaagaatagttggatctatccgctgcactt  
tagaatatttttagtatttctgaataaataa gaaaagggtgcacgatctc gacgaattactctgaataaatgcagaaatcatatgaaagaaccatagcattcgcgac  
ctattgtaaatcaaatcaactttagtctctatagaccaataatagagaccattaacacgtttaaagcctaactgcttgaagctagggcaaaaaggggacttctta  
caactatattagattagaccaaatgcttfaaacaggaaatagctaattgtagaattatctgatatagaacactcatatcgataaaatggttgaaactattactagaagg  
ggcaccctggcctttttatccaatgccgaatcgacgacctatgtataaaaaaggagaagttttgatttgaagaaaaaagtaggaattctatccatttctatttccatt  
ttctatttagtttcttaatgaaattgaaaatttaactaaaggc caaatacaataaaaaaacacttttctgcccacgatagattttatctagggcgaagagtcctct  
aatatttactagcttatatgggttctggtatattgaaatataaacagaaaagagagggtagaggataggctcattacataaaaaaataatggagtagccatagca  
aaaaagaaaaaggagcgtgagagc caaatgaatcgaagattcatgttgggtcgggaagagatataaaagttaaacctaatagcaaggaatctactttcat  
taaaagatttattagataatc gaaaacagaggatcttgactattc gaaattcggaaagattcgttagaggaaaccattgagcagctc gaaaaagctcgaattcgatt  
acagaaaagtcgaactagaagcggatgagatcgaatgaatggatactctgagatagaacgagaaaa gcaaatfattaatgccacttctattagtttggaaacatt  
agaaaagtcataaacgaaacccttattttgaaaaacaaaggcggatgaatcaggctcgcacaacgggtttccaacaagccgtacaaggagctctaggaactc  
aatagttgttgaataccgagttacattccgtacattcgtctaatattagcattctcggggccatggaatggaaagagttaaatattagccctgaacttctacttcc  
tttagaatttagcatttttcccttcttccgaaaaaaaatagtaaa gaaactaatggcaacccttcgagtcgacgaaattcataaattcctccgcaacgat  
tgaacataataagaaaatgaggattgagaatcgtgctgcgtagtcaagtggggagtggtgctctgattataggcttggtaaaatgtagggcgaatta  
gtcgaattgcagaaggactaggggtattgctctgaatttgaatc caaaatgttgggattgattaatgggcgatgggtgatatacaaggcagctttttaa  
aagcaacaggaa gaattgctcagataccgtgagcaggccttacttgggtctgtttataaatgcttggcctaaccctattgatgggagagcgaattgtagcttc  
gaaatcgcctaaattgaatcctctcctccgggtataatttccaggcgttctgtatataaaccttcaaacgggcttattgctatcgattcgaatcctattgggcgcg  
gtcagcgaagtttaatttggggacagacaaccggcaaaacagcagtagctacagatacaattctcaatcaaaaaggcgaagatgtaatatgttttagtagct  
atcggcaagagcatcctccgtagctcaagtagtaactttccatgaagaggggccatggaatacactattgtagtagctgaaatggcggattccctgctaca  
ttacaatcctcgtccttatacggagcagccctggctgagttttatgtaccgcaacggcactatttaataattttagatctctcaaacaggcacaagcttat  
cgccaaatgtcccttctattaagaagacccccggcggcgaagcttaccaggggatgttttttattgcaatcagccttttagaaagagccgctaaatfaaattctctt  
ttaggggaaaggatgactgtttaccaatagttgagactcaatcggagacgttccgcctatattcctactaatgtaactcctaccatagatggacaaaatattcttat  
ccgcagatctattcaatccggaattcggcctgtattatgtgggtatttccgttccagagtaggatccgggctcaaatfaagccatgaacaagtagctggca  
aatcaaaattggaattagctcaattcgcagagttacaagcctttgcacaattcgcctctgctcgcataaaacaagtcagaatcaattggcaaggggccgacgattac  
gagaattgctfaaacatccaagcaaatccttccagtggaagagcagatagctactatttatatcggaaacagaggatattgattccttagaaattgacaggt  
aaagaaattctgtaggttacgtaaacacctaaagatacctcaactcaagaatatactcttagcaagacattcaccgaggaagcggaaatccttttga  
aggagctattcaggaacaactcgaacgtttccctcaggaacaacataaattttgcacgtctactctgttagtagaagtagtagaggagaaatcgttggaaaa  
gattttcattgaaatcagcaaaaagtttcttagtttttagtatattttaaagaatagatagaataagattgcgtccaataggatttgaacatatacaaaagggttag  
aagacctctgtcctatcattagacaatggacgtttttcatatttcttcttttcttttatttcttggaccaagagaaaaactgttagacaaaactcttttagaaa  
aaaaacaaatgcatatacaaatgtagatgcataatcataaagaaggaaatataatggagcgggtagtgggaaatcgaaccggcaacccacggttatgagcctgt  
cagctaccaaaactgtctatcctgttaaactaaagagaggggaactagtggaataaagggggttgaatacggcctctaccatctatacaaatagaatagccat

ttatacagaatggtaaaagggtcttctacgatcatcaattccagaatccatacaatacgaagggtatffatcttccaactggatcttggcaccggtaac  
aaacatgcataaacatttctcgaagatggtccggatagcccaagctcgcgatagtgctcgtcgtcgtcaaaaaaacagctgatgaaggcgtgctgg  
gactattacgtggcagggtgcaattttctgcattttcgttttactcaaaccaagggtaaacttctcttcttttttgaagatcgacgaatcaaatgata  
ttctgttctaatttctgccccttctctctgaatcaacttttttgcataatgtccgttctactatctaccaagtatacggttctaacttagatgaaaaataat  
agaaaaaagaatcgaaggcggatcctccccctcaatcaagagtaagtaactaggtcgtgatacagtaacaaaaaactaactaactaactgctgatg  
tgaggcaatcaagaagcggcataagtgaaatataaccacggaaaagtgagctaatccaccaatctgcttgcacaatgaaaagagccacggcttctctc  
cagcgaatfaaattaaccaaggtgcccgttcatgagccatgctaaaagctcaatfaactctgccaatccacgccagaaaataagaacataaactcagtcgcc  
caacaagatgccaataagaacatccacgccataccgataaactatcccaaaaaggattatccattgataagttggaagagtttaacataggtatctct  
taacatccatcaataaagtggaggatcattaaattgtaaacgttgcctgccaatgtgatgttccaatgccaataaaaagtaacccatcaatggtatftaa  
catccgaaaaactgccaataaaacgcgtccaagcagaatatacaagtaccgccgcgaccaggccgtcgaaggaaaactatatcaaaaactttttatcc  
ggcattatftggaaccgcgtgatctaaagcacccttactaaatcaatgtagttgatgcaaacctaaaagcaatagcatgatgaaccaagaatctccaggctca  
ttgftaagaaaagcgaattactatctcgttaacagcattcaaccatccgggtaaccataggggtcaccgcattgaaagcgggaccgctgtgaaagataagagta  
tatgaaccatgatgcttaccatgagccgattgatccattgagcaaataggttcgafcaagattgctttctgagatccaaaagcaagcatgacgctcattat  
gaacataaaaggccaaggtatgaaatcctaggaagagactagcccaactaaatgagatagatagcttctttatggtctaactcttccaatacattatcctcattct  
gttccgattgtaactctaatgaaaaaatagctccatgagcaaaagccctgcatgatgaacctgcaatgtattggtgatgatatataaagctgctgagtagta  
aagcttctgctatgaatgataaaggttaagagtagatattgagctactaaggaagtaataaccctaaagaaagctagagcaagacctaattgaaatgaatc  
gaattattgattgctgtaaaaggcccttatgccacgccctaatcgaacccccggagagtagtcttctaaaagactttgatactgtgcccaatccgaagttagt  
tcgatacatgaccggcaatgagaaaaataatgcaatagctaaatgatgagcaaatatcggctcagccacaactttgtttgtggaatcccccaagaa  
gagttagaatagcaattccgctctgagtggtaccataaattgactacgaatcggggtttggcataaaagattccactgaccctcagaaggggtcccaac  
ccctgtggatagggtaatacatcgaataatttccatcgaactgactcctccctggtgctggaatagcgacatgaactaaatgtcctgtccaagcgaagaactta  
ccccgaaaagctctgacaatgatgattgagacgagattccgcgttttgaaccagaaaaggctgttccattgggtgtagatgaaccaacccccattaaagga  
tagggtagaagaaataatgaaaaagagctcctgtataaagcttcaattgctccgtaatccaattgtataccaccactgataaccccagaatagcgatattact  
ggaccggcgcgctcctcagtaaaaggcttcacagcgggtgacaaaatgagatcccaatcgatgagcaataggtcttacgtgaaagatcctgtatc  
catgattcaaaatcttccaagcgacatgaacagatttccggacgtccatagaaaattattgctaaftgccaagtgaagcaaaaatgttctgataaagac  
gttctcagtaatatcatgacttccgaatcatgtcggtagcaatacacaacaaatcagcagtagtgggctcctgagctaaagccttgctaaacctgggaa  
atcttaattccataatgctttcaatcctcctgaccactatcctactgcaataatctcgtcaagaagaatgccatgttggcaatccaccagaaggtaatgggt  
actctacagcagctctgtataatgctcaaggctctaggtgagtagcagagcaacttttaattgttaggcccaaacgatagattcaatcagttcttccaata  
accacggcctgtaataaaacattaaactgaaggccccagacaaaatgagcactaaagaaaaagaccataatgggataatgaagaaccataagactgaatta  
cttgggatgctgtgccacaagaaatcctggagccaccattaatgtaatggaactctgtcaaaagttccccctgtgatagattaccacccttgatcattata  
gtaccccaaacatccgactgattttcaactgaatgaaaaatgactaccgaaatggaattgatccagaatagacctaaagaaacatgatccaggcggatc  
ttgacatgtccccctgccagggccatgcaggggaagcgaaaaccaagatttctttatcgggtatcaaacgggaactgcgagcaataaaacacctttcaaa  
agtattatacagtcacatggattgtaaatgctgtaatgtgatgactaaaaaatctgcggttccatggaataggtacaagcaactttgccctactgctacta  
actgccacctccccagttaaagctggtacttgttgcaccaggagctgttacgctaggcgcgccagcatggagattttgaccattgagcaaaagatcggttga  
attgatggcgatccgaaaacatatttgggacgacctaaagcactcatggtatcattgatgataaaacaaaactgtgaaaacctgaaatatacacaacca  
gttaaggtgggataatgattcatcacggtgctaaaggacagatcaatagatcgttgcagtagctggtgatcagatgctcttaccataaaaatggctgatgtag  
cagccaactattagaatccccaatccatggtggtggaacaaggaaattgtgacatagtcagtagctaggtatgtagggggcagatagtagtacat  
atgatgagctacaacaatggttagagcctagatagctaggttaagagataatgagatgccatgacgttggtagattcatagagacctttatggcctgtcctg  
taaattggcctttatgagctcaaaaatactttcaggccatgaccaataccaggttgcctatacatgacctgcatcagaaaagaatagcaatagctaaatg  
atgtgcgcaatcgtcaaccatagaccgccggtattgtagctagccctccgcgaaaactaaagaatctgctgatttggaccaattcaagtgaaaaagggg  
ttgctcttcggcaaaactagataaagttgagccaaaagctcgcgattcaagataaattcatgaggaagtggtatctccttaggatcaaccacagcgtcaagaaatt  
ggtaatcgtaaagatagctgatttgggtccccgcccaagaaagagaccagctcaataaccctgtaagtgatgattcaacatggattctacgtcttgaacc  
gttattccggatgctcgcacaatcgaaaaaaccggagggtatttggattcctcggaaaacccccgctacatcaccattcaatatttctgacctacgattggcacaac  
tacctgagcactgggtccaatgtgagtaggatcattagccatgctcataatgaaaaacggccaccatggaagtacatgccactcaacaaaagaaagataatg  
gagagttgaccgaaatgagcactaaagactttcagagatctcctcaaatcactgtatgactatcgaatcgtgagcatcagcatgtaggtccagatccaagtg  
gtagatcagggcccttagctattgttctgagaaatggccgggtctgcccattcctcaaaagatgttttacaggatccctatccacaacaattttactctggtccg  
gcgaacgaatcatcaatagctcctcttccggacaagacatacaaaagagaccgcccaacttttagtaaccttgaagatagatattatgattgctctttcttta  
ctatctaccgctcttctttttttttagttactgagcaattatataatgaagcaatctgaggcaagtgctggatctattatgacataagattgggtgcttaacgg  
acttttttcttggatttccacgtaacaaaaaaccttttttaattfaaaagctagtcttttttaagagtataagctctatctatctacttcttctgagcataat  
agattttttattcattcaaatccaagataactcattagaattatataaagatggtcctgatataatgcaatattatattgcccccttttattcgtttatcttctattct  
gacctatcgtttatccttatgaaatataatataaatagaaggcagagaaagagataatgaaattctgattcgatctccgacctaatattttgattaatggatcaa  
caaccaaacccccatttctgaaaaaggagagtggtcttattcaaatcaaaagcgtctgtaattctcaaccagttctgtctcaatataattccccggagtaagcgt  
tagcttgttccaactacgacgcttcatcaaaccaagctctgcaatttctgaatcaccctgtagaatggcctgttctccccggtcgaataggtatgcttccccct  
gaaccgtactgagagtttctactcctacacggctcagaatgctatcttaatttccctgtcttaactgaattcatttctcaaaaatcagccaatttcttctgggtacg  
cagaagaagtttaactaagtttcaaacctaaatttggatcaataatcagtttgcatttttccaccctgcagaaaaatgaagcatagatagacctatctctcgtc  
cgaatttctgaaaggttaactatctcgtttcatatagaaattctatagaatccttgaaaaagacttttccccataagcaagaaaaaagaacttactatcttgggatct

gatactacaccgctgcttaaccccttagtgatgcgctcttattacataagcggattcctaaattttgccccatatacatgggataagtaagcagttttttagtctgtc gac  
ccagtcggcactaattgatctttacggctcttctctatcaatttgagaactctatccatagatagtagatagccatacttcttctctattttgattcctgtaagtgtcc  
tttcttctacagctgataggccaaaatcgttggtttgacgatccctatgtagaaagccccctttctagtaaaactagaaaatggatccttcttattttctctatagtg  
gagatagtcgcacgtaatgacagatcacggccatattataaaagcttggtgtaagaagggggttcgttctagtgtcccggaaataattccaagcccttgatgtctct  
ccattgctgtgtgtataggccctatgtatagatataacttcgatcataggatcaatttctagtccgtagcttcataataattttgc aaagcttccgataatcttct  
cggattgagccaacatccgttacggctgtctattcaaaaaatccctggtccaaaaccgtacatgaggtttcacctacacggctcctccctctgtacatagtagt  
aagcgaaaaaatctagagaataaaaatagaatttagtccatctcattatggaccgaaagggcgctggtattttccaaagaatctctagccaacctcccacaagaggtt  
ttcctaacaccaatgaattctattaatgctagaggaacgatagctccaagaatttttttctcaacgccctctatttagaggaattaggcacttcaacgatctttgat  
ggttatagggtatccaaagtacaaactgatggtgtttttatcccaaccattctcccagccctgataccaatcaggaaagggttaatttcaacaagttttctctg  
ttgattcctattctagggtagtgctttatccccatgctacttatttagtactagtagataggattagcctgtaatacagaacctatcctgtaggtgtaacctttcgtc  
atactaaaatctacaattgaagcatccgggccgctcagctcagggatcacgacagaagaggtttagttcaccctcaccctcccaagctggtgttcccttacta  
atftggttctctccgcgaacccccgtcttctcgtaaaccgggggtgtaggtaggcctaaaaaaacaaaaaaaaagagtcaaacgcaccatctataaataagta  
atgccctttttccccggagggttcggaattatcccaataaatattggtacaattgagaaggtctatcaatgaatttccatttatacgggactagggcataatccc  
aaccctctctatctatagaaattcttttctctccacaaataacataaaaaaaacaaatccattcaatttataaactgatccctatgctcaaatggataag  
agaggtatctctcagcccaatctctcttttctctgtttgaacaagaagagatagaaaaatftgactaagattggatttccattcctatttcttctcaac  
aaaacttctctatcaactatctcatttcaaaagtcaatcaatcgtccataccctatttctatttattgattgattgggtgagataccttgcaaacagaattctagggctc  
ctttttatgaataagaagaatctccatctcttttctgtttgggttggaaccacaaactaaacttttcgagggagcggaaatcctagtaaaaaatctctggacc  
gtcccacttagtagaaaaggaatfttctctataagaacatggaactctcgcgcgtttggttgcacctgactgcaggaatggaacaaactcgtattcactctaggtt  
ttttccataataagatttaggagagagatggccgagcgttcaaggcgtacgattggaactgtctagtacactttgfttaccgaggggtcgaatcccctccttccgt  
tttcttaactcagcaacgtaaatgattacaatgtatcaaatcaaatgacaatttccagcaataatacaaaccttttataagaatctctataccaactactatggt  
atgtaaaatacatagaggaagaacaaaaacaaaaaggaatcctagggttaatcatttctgttaggtgaaatgggaaatacgaattaagagccttaggtcgatt  
tagttcgggaaagggaagggaagaataatctatgaaccttccgtttttctaaagtcaagttgacgagagtaattctacaactacaactcattttttgaga  
ccgaccacttctatecaggattttttfactgctctttatattgcaatgtgcaatcgtcaaatgctttggcaatttccccgggtcggatgaagcaatagaatfttgaac  
cagacgttttgatctttgtttatctctgtatgaataatactcgggtttgcaacgaaaactgggtatacgaactatagaccatcaactaaaatgtctatggttaactaa  
ttgccgggctcgggaaatggtgaagccatcctaatgaaaaaggatattatcaaacgcatfccaagtaattgtagaaaacctgactggaacttttcttctcc  
agcgatgtacatataagaattgtctgtctcagaccataatgaaaacgcaatfttctgttttctgaagacgaatacgaatggtctttttccagaatggaattc  
ttttcagactcctccgatttaggtgttttctagtgagcctgtgtaaagcctccagacggcgtattttttaaactgaggtcctcgaatacgggacatgaagactcctt  
ttttatgaaatftcattttacacaaatattctatgatttacacagaatacctgaatataaaactgaaataaagtaaaaggataaacagagtaaaactactaaaagta  
cccaaaaaaaggaaatcctaacatctgaattttgtatatattattattttatttattgattgatctagcaaaattgtagggtagaacacataatagatcctgcttctc  
catttaattcggagaaaaagaggtattttgttcctggaacattgatagaaaaaggcactatcggattggaaccgatgacctcgcattacaatgcgatgcct  
aacctctagcctaagtggtctacataacagaatagtgtaacaaatagaatattgatagtataggaaatcctgaaaatgtagcttaattatattattttagctatta  
ctagttcgaaattggaggtctacttagaaaaaactagaaactcataaataaaagtttagatagattttttgaaacttctttttcttaattcgaacatctatttttaata  
gaaatcttccaatttctatattgaaattgatttttagatatttttaatttgataggctcggaataatcacaatagtagataagaataataataatataacgaaaacata  
ataaagagaacatcgcgaattctgtattttcagtcacatattatagacatttttgagatattttggttttttatttcttaataatttaafgattaatattctcaaggagaa  
catagaatcatagcaaatgaaattgctaattctgattgcaaaaaaaagaatgaatcaagcgttatagtagattttgaaactctaaaaaaaggaaacgcgtaggt  
ggggggagagaaaaccttgggafatattgattcgaattgcaafacataacgatagaatacaatcaatgctgaaftgcaataagccggagctcctaactaga  
gacgaaccgtagactacatagagtaatgaattcaacgattcaaaaaaactaacagatggaggaatgcaaggaatcctgtctcaagaaaaaagaaatg  
gggataggcgaatcggtagacgtacggacttgattgattgaccttgatggaacctgctaagtggaacttcaaatcagaaacctggaatftaaa  
aagggcaacatcctgagccaatcctggtttgagaaaacaagcggtctcgaactagaaccaaaaggaaaggataggtcagagactcaatggaagctgttca  
acgaatcgaftaattacgttggctcagcgaactccctctaaatagggaaagaagggcttccgaaatcctaatacacagctatagatactggcatagcaaacga  
ttaatcagaaactacataatataaggtctttaaattctttttaaataaagaaataggaatgattatgaaatgaaatcataatttttagaattgtgtgtaaccattcc  
aatcgaatattgagtaaatcaaatcctcaattcattatgtttcgaatctttttaaagcggaattaaactggacgagataaagagagagctccattctacatgcaaacactg  
acaacaatgaaatftctagtaaaaggaaaatccgtcgaactttctaagctgtgagggttcaagtcctctatccccaaaccttffattcctcaactctagttatcctg  
tttttttataataggtttaagattcaatggaatacattttttttattatagatccaggaatgctgattattaactgataattaaatattataaataagccttctttgtac  
aatgcataggaactgcccccctcccatctcaaatfttgatattgacatagatcaaaactctactaggatgatgcacaagaaaaggcaggatagctcagttggtag  
agcagaggactgaaaactcctgtgtccagggtcaaatctggttctgacacgaaaaaaggatcttccgaaatggtattgatacaaatcctcagatgggtggtg  
gatacatattgtaataatatagatagagtagatattttctatcaagtagataaatctctaaatagagccactcttttctgattttgaaftttctaaftttctattcctatt  
ccgacaataatfttttattctgcttacttctactcttctctggttcttaagtaatgacgaggtcacaagttcgtgtagggaactctttagctatcataatftttctgtt  
catacgaaggaaatgaatatgtatttcaaacgaaatgaagcctttttgcttagctatctgaacctttgtataattgaaatgaatgaataggatttctgtttc  
atctaggcaacagagcgtaaaaatftccttactgcataaaactggaggtttgtttataagtagcaatgaatttctatcattcaatgagcatctgtatttcatagaaa  
ttgggggtfatatagctctacgaaaggccagcctatccaaacttcaggcatttagatctgtttaaaggcgtggaatgattacataagagattcccacatataaaaga  
ttccgtcttgaatacggaaacttccaaatccagaagacagatgggattcaggatattcttttggcacaagactttatgcatacttcttgggttattctataccat  
actgtattctctgaagatgatacagctagctaagatccaccgggtgcaactgcataagcacatgggaacgtaaaaattgtaacctatataaaaatgacag  
caatggaatcccactctgctttatttgcaagctctattctctgatgacgaagcccagaatctatgaaccacatctgttgactagccaatagataaccaac  
cctgctgcattactctgactctcctcttctgataaaatftcgcagttcgaatgcaagtttgaaatattgcctgctcttctttttggcacaagagctcccctcaattcac  
taattttaggaagatactggactttggttgaaagaaagttcagaagatattgtctaaagttagatggtgattgataagcaatcttctcataagtccagtagtagtac

tgcgccaacataaagcttggctgtagtaaacatcgaatctctttgagatagatcctcaactatctcgcgatactcttacgaagtttgtagggca  
tctataacagcctctggttagtggtggcaaccggcaagtagacgtccacaggaatfaactatcaactccccgaacagfactataggaatccgactgaacattcca  
ccagtaatagtagaacgtccatagcaatgacgtatctgggtcaggcattgctcatataatctactaaagaggagccattttcatgtactgtaccgctgttaaaa  
ttaggtccgctgcttaggactgtatctgtgaccaatccataacgatcaagtcgaatctgtagccttattatgaagcaaatcaatgaaacaacaactggtaccata  
tagaaggggccataaactagagagcttgaccaatcgaagatctttatgtagtgaataaacggaattggaactgttggtcaagtaggggaaactcaatcaaaa  
ctcataactgtcttaatggaatcttctctctttttttttgtctgaatattcaggttaagaccattccaaggctcctttccatgcataaactaaaccaacaactaggata  
agcacgaaaatgaaagcttgataaaaacggatataccaatcgtcgaactcattgcccagggtagagaaaagaccgtttccacatcaaaaacaacaaaact  
agcgcaaatgtaatagcgtatcgggaattgaaccaagccccccatgggtctataccgattcataactagaaagcttctgtgctcctcagaaacggagct  
aaaagtgtgaaatccaaaatgctaaaataggaataaggctgtctattatagaatgcccataaataatcatattcgtgaagcagaacataaatgtactcccattaat  
gtggaatagcgggaactgaatgtagcaatcaagtcagcattgcaattatacagaatctctctcttctcctggtgaaacaaggatcggttttctcaaaacaaaggc  
ttagtttagcctttgttctcttggccagctctcttaagatcattcaatggaatccgactccctttttgtattccttctattataggatggtggagacataatctta  
tagaaacaaaactctcctcctcattgtctatcttcttagaactcttagaaaaggataaaaacgaaataactacgaatfagagcctaataagatagatgacta  
atgtatgcagcctaagagagtaattctataaaaataaagaactctattcagaacgtatgactgattgattaggaatctatagatagataagcaagtaata  
ctcaacaaagtaggaatcgaagatggagaacatctgcaagtgattgatagaaatcttttctctctctataatcttgatgaatgagcctctgtaatcc  
ttttatcttattatggcgcagccgctgtccagctataaaacagfactaatagggaaatgaaactataactaaaggaaacgtagatctctctaaaactaaaa  
aaggacatattagggtatagcgaatcgaaccgtagaccctcggtaaaacagatcaaacggattatctgaaatgattcgaactgtttcaagaccaacatgcat  
ttttgtcattgggtcttttatacactgatagaagatcaggtatgctccaccatagttttctttacggaaagataatgagatggctccctgcctctgattgattttgatta  
tcatctataagagcaataacaaaggtttcaagaggagattaccctgactgagctgctccggcctaaatataaacctaaagtaaatagatgctctatcgttcc  
gctacaagagttgactatgagactcatacaccctaaagttcatagaacgaaaagaatfttttggaggcccttatctctattaagccttagcatttagggctggataatf  
acctatacaactagcaaatcaataaagggttctattgttttaggcacctggattgctacctgaaatcggactgaaccaactattgtcaggcactgttctctattctcga  
atccatgaagtagacatgattttgcaagaagatccactatgctcattgcataataagctccctgaaaagcattggcgacgtgtaaacgagtgtctaccgaactg  
agctatagccctgtcagagatcttaatatagagaattctgtcaagatgaatattcttaatagtagaggatctctttgatctgttactataataacatacaata  
acgaagcggatattgctfataaaaaggattcgtatataatcgtcgaagtaaaaggcttctctttgtggtgataaattgcctacttaactcagttgtagatgattgctttc  
atacggcgggagtcattggttcaatccaatagtaggtaggtagtagaanaactactagatgactggcctactctcgtctcgtatctataatfttttctaccctct  
tcccttttctttgatcaactaaacggttgggttcttcaatfagatgggggaatcaatcaacgcctcactcgtatctctagctcgtctgagagctactctcgttcaa  
ccaatttctctgaccctcagctctactcagttagcttccgctattcaagtcctgttgactcttccggatcaatgctactaccagttccgcatctttctaaaatg  
atgactcattataactattctggcaaacgctccacagaaccgctgtaaccattgactggtgagggcgtattctcaaggaccatactacagctgtgtaaat  
gggggctgtgttggtaatacgaatftggcactattagtagataaafgattcttctactcaaatccaaataatcgtttaggagtcagatataaagattaat  
ttctttctcaattgttctctctcttaagttatagcttctgctgactctcagatgtaaccaccaataaaaagcctgttcgggtagccgtcaattctccgaaa  
ggattagttgaatcccctaatagtttctgcaagaccaatacttcccggagaaccgtaaaaactctgcccacaaaaaacggttggtaaaagcgtcaatttt  
tctgtctctgtacagttaacgatccctcccgataatcaccacccaagaattgcaataatgctcgaagttcttgaactgttgaagtttcttaactctttgcg  
cagttctataatgttcgttccaacgatccgaggttgaacatagttgaggttgaatcaaaaggatctactgcaggataaatccctttggaagcctaactctggaaagt  
acggtagtagcatcacaatgtgcaaatgttagcagagcagggtcggtaaacgtccgaggtacataaacccgttggatcgaagttatagatcccttttagta  
gaagtaattcttctgcaaaagaccattctgtactaagataggttataaaccactgcagaggcattctccctaataaggcagatactccgatcctgcttgaac  
aaaacgaagatattatcagatgaatgaagcagcttcttattaaactctcggaaatattctgccatagttaggcagtaaaacaaactctcagagctcctggc  
ggttcaatctttggccatagactagactacctttgattctcaagattttttcattactccagattcctcatttccatataaaagatcatttctcagagctccgttc  
ctactccgcaaacatagcagacgccccgtgagctttagcaatattgttgaatattcctgatgagactgtttactactccagctcccccaaatagtcgattttc  
ctccacgccgataaggagctaaaagatcgaccacttaatacagtttcaaaatggataattctgatctaacctgataaaggcggcgctgatgatgaatggg  
aatgtgactagatctacagaccacaatgtcaacaggctccccaaagcgttgaatctcctcaagagtagctccaccgacaggaactgagaggagctc  
cgtgcaatcacttccatctctcaacccatctgtagcactcatagctactcactcattttctcaataatgttgaactcacaagttacattaatttgcct  
accgtcagtgctcactctgactaccaaagcattataatataaggtacttccccgggggaaaagtgacatccagcaggggtccaataatttgcgatacagccc  
tgtactttttctcaattgtaaaaccccgggacgagaaagtagagattgttctcataattatcacataattttcaaaaaaaaggaaatttgcgaaattttgtt  
gttgaataatgccaatcaacacaaaaaataatcaaaaatccaaaagtcaaaaggaaatgaattagtttaattcaataagagagaaaaggggaccagcactgatt  
tctgtcccaaacgaatccattcaactgttactcatggaatgagctcgtcgaaggtcaatcaatctttttcatatacattttgcttttgaaacgatttgcctact  
ctactttctatctagactcgcatacaaaaatataactactgtgaagcatagattgctgaacagagaattttctagtagtatttaggtatttccactcaaaaataagaaaa  
gggggtctattaagaacttaataaggattagaagttgatttgggttgcgctatatttaaaagagtatacaataaagatggatttggatcaaatccatggttaata  
acgaagcatgtaacttaccataacaacaactcaattcttcaatctctatagatgaatcctatagcagatgacacagggtgtaaccattatataatgaatgaaa  
catattatagatgaacatattcattactaagcatcccccttttcttaatgagttgatataatgaataatcttttttaagattttgcaagggttctattacgccta  
atccatctcagtagaccctgtctgtgagaattcttaattcatgattgtagggaggacgtatgaccacaacagaactaaagcaagtgttgatttaaaact  
ggtgtaaggtattataaattgacttactacaccccggagtagcaaaccaaggacactgatactggcagcattccgagtaactctcagccgggggttcccccga  
agaagcaggggctgtagtactgccaatcttactggtacatgacaactgtttgactgtaggactaccagctctgactgttacaagggcagatgctatcacat  
cgagcccgttggggaggataatcaatatacgtttagctatctatcattagacctattgaaagggttctgttactaacatgtttacttctcattgtgggtaacgtat  
ttgtttcaaaagcctcagcgtctacgtctggagatctgcaatccccctacttattcaaaaactttcaaaaggtccgctcctatgatacaagttgaaagggataa  
gttgaacaaatagctcgtctttattgggatgtactattaaacaaaattgggattatctgcaaaaatattgtagagcatgttatgagctctacgggtggacttga  
tttaccaaaagatgatgaaaactgaaactacaaccatttatgctgttggaggaccgttttcttttgcggaagctatttataatcacagccgaaaccggtgaaa  
taaagggcattactgaaatgcactgcaggtacatgcgaagaatgattaaaagagctgatttgcagggaattagggttctattgtaatgcatgactactaac

cggggattcaccgcaatactagtttgctcattatgccgcgacaacggcctacttctacattcaccgagcaatgcatgcaattatgatagacagaaaaatcat  
ggtatgcaattccgtgtattagctaaagcattgctgtatgctggggagatcatatccacgctggfagcagtagtaggtaagttagaaggggaacgcgaaatgacttta  
ggttttgttgattattgcgcgatgattttatgaaaaagatgctgctgcggatcttttctactcaggactgggtatccatgccaggtgtataccgggtgcttcagggg  
gtattcatgfttggcatatgccagctctgaccgaaatcttggagatgattctgattgcaatttgggaggaactttaaggacatcctgggtaagtcacctgggtgcag  
cagctaaccgggtgctttagaacctgtgtacaagctcgtaacgaagggcgatctgtcgtgaaggtaatgaaattatccgatcagcttgcgaatggagtcct  
gaaactgcccagcttgtgaaatgtaaaagcgtacaatcgaagctcgaagcggtagataaactagatagctagactaagtgataaaatagatagaaaaagg  
tctaataaaaaagaaagagaatagaagatcaaaatcagttacgaaatgcagtaattcttcttttcttaattgattgcaatfaaactcggctcaatctttttcaga  
ttgagccgagtttaaatagattttgatacgtatgagacttgacaaatcgggattcctcttctatataatgaaagataaaaggataatacaataaaataacaat  
atagtattatcatatgataatggaatcaaatcgcagatttacagaaaaagtttctatttgggaaagaatcaatgacatacaatgacattacagactgatgacttac  
ccttaaccgggtatttcttactctagatagagaaaaaactaaaggagaatgaaagaaagacagagtttggaaagtagacccttttaagactctcttcc  
aaaaaaggacattttgaaacttttaacagggcacaatcgtgagcaacaagtactcgaatgctcgtgaagaaagagaattgatttcaaatggtagaactagat  
gacgaagtttctataacctgatgagaggttagttttgactccgatcaagagcgagaagctttcattcagattggactgctatagaatctggaccatcgt  
agagacttcaaaaaggctcctgatgataagaatcactttcgcggaactccatggggctatgggctcaacgcggtagacgtttgtccgaattttctggagcaaa  
cctccgaccaacgatacaatgaattttctatcacaagaaaaagattcggaaatcgaatgctactatagcaccggaggaatattcggaaatattcttatata  
atccattttgcccgggcttactaacaggactcgtcgcacgagacgaggtatcgtcaaaagctaaaggctatccggatatttctacaccttgggggtgtatag  
gcttacaagctaaagggtagtagatgagatctgtatgtaggtaaaagatttgccttggattgagtagtctatttccctcttaccgcgcaatgtatagctctag  
aagagcagctatgcagagaggaatfacagtttaataaaaaagcctaaaaaagttaactttacggcaatcaatcaactaaagctctatgatcaatcctctacg  
cggatttggggctcagagagtggttgaataagattgcatgtggaaggaagtagacgaaaaagatttggattcgaatagggcattcgaactagctacttga  
atccaattcaagttcattagaaaggtatgaaagccgcgaggtatcggaaaaaagaaatccttttaattgcttctccttttgcattttctattatataatcc  
attcgattcttttttagaacttttagtattctaaaaaaagtattctataaaaaatccttttgcactcaaaaatataagtcgaatattcgtataatagatataat  
tatacataagaatcttaagatattttgaatagatcaaatcgaatagatagaatagtaatttgaatggagacactattctatgatgatttactaccctctatttc  
gtgcttttagtagccttagtatttccgcaattgcaatgcttcttatttctttagtgcgaaaaataagattgctagaaccgacggaccgaatttctcaatgatttc  
cacacaggatcataatcggatctttagtgtgtaagtaataataggtatgattgcttctctacacacaatgcaaacccgctatggtgggattatggtg  
cggatataggctacgagcataaatgcatgcatatgcccgaaccgggtatagcaggttttttaagtgatcaacaatacttttgaatagaagcaatgatataacca  
attattttacaggatctagttggcgaagggcatttcagaatcaaaaaagtaaaagcaaaatcattagcttattctcaattcaatcaccgctgttagtatact  
atatgaattggcgtacgaacacatagatagaacttcaaaaggttctcgaaaaagaggttaatttttctggcctgtattctttctaggttactaggtttagc  
gttggggcttcagttatcttggtaagaatattatctgtacttccatcacaatcttttttccacaggggctgtgatgctttctacggaatcgcaggctattc  
attagcgttacttgggtgactatttgggaatgtaggcagtggttagaccgattcgaatagaaggggagtagtgcattttctgttgggattccttgaata  
aaagctgcgtcttctctgattcctttagcgggatccaatcaatgaaatcaggttaaaagaggtcttttctctgctgatcctttatagaaatccggggcagg  
gggcccattcctttagctgactgtagaagttttactccagagaatgaaacaaaagctggcaattggcttatttctgctcagatacaatggaagtattgag  
taccattgaatttttgaatgaattgaaagaagattggaagaagaaatgttctcaacacgagggaaaaggtcccttgaatgcaattatgaaagggatt  
ttgagttattatcaaaaggaagcaaatgaggataagagaaatgtcttaatttgcgaatgggataatgctgcaatattcttccattttccagaaaggacttt  
ttctatttcttattccactccatctagatctaagaaagaactcaatgcaatgaaattctactgtagataaaaaagaggaatagatacaaggctcacaacctgttag  
aattttcttcaagaaaaagaaatcatatagatcagcgaataaagcggattcattacaactcaattacagatcaaaaatgaaaaaaagaaagcattgctctc  
ttcctatattctgattttactgacttttgccttggggagctcttcttcaacaatgctcggaaatttggatgaagaattggtggaatacaggcaatcccaactct  
taactgctatcaagagaaaaagatttctagaagattcaggaatgaagaccttttcttggacgaatgataaaagagaaaccgaatacacatgtaaaaaacc  
ccctataggaatcgaaggaataatacaatggccaaaatagataatgagggctatcctcatatatttgcatttctcagaaaataatctgtttgctattcgaat  
ggtcttttttctggtaaaaggaacttgtattttgaaatcttgggttcaggaaattcttataactaaatgactcagtaaaagctttttattcttttagtactgattttt  
ttgattcactcccccgggtgggaactaattcgttgggtctataacgatcttggatgggtcctaacgagctaatcttactattttgttagtttctctgatt  
ctagatacatgtttgaattttgggtctttttgttfaaacgcctatctctctgctgtagtcatcattatcattcaattagtaagcataaactattgatctctgatfaat  
caaaattagcatccttttctttagaaagaagccttttccattttagcaaaatctttttctatttctactgctcaaggatctcattcagtaactggtgcagtag  
aatgacaacagattcgtgtataggaactagattagcttagctacatcaattattgtagaatccgggactgtgattggacatgaaaaatagaactttttct  
gggtaaaggaacagatgactgactgatttctgtatcgtatcatgataacgtaataactcggacatctatttcaaatgcatatcccatttttgcgcaaggtatgaaa  
accacgagaagcaactggacgaattgtagtgcgaattgccaattgccaattagcgaataagcctgtggatattgaagtccccagcagcttcccagactgattgaa  
cagttctcgaattccttagatagcaactgaaacaagttctgctaattggaaaaagggaggggtgaatgtgggtgctgttcttattttgccgagggttcgaattag  
cgccgccgaccgatttctctgagttgaaagaaaagataggaatctctctttcagagttatctgcccataaaaaaataattctgtgataggccctgttcccgt  
aagaaatagtgaaatcgttttcccatttcttccccaccctgctatgaagaagacgttcttctttaaataatcccataatgtgggggaaaccgaggaaggg  
gacagatctatcctgatgtagcaagagtaacaatcggctataatgcaacgtcaacaggtgtagtaaaaaactcgtgaaagaaaagggggatagaaat  
atccatagctgagcagcggatggacccaagtattgatcttatactcccgggtccgaactcttgtttcagaggggaatcgaactgataaccattaca  
agtaactcaatgtgggaggggttggcagggggatgcagaatagcttccagatccattacggttcaagccctttgttctctcgcacccgtattttggcaca  
gttttttggttcacaagaaacagttgaaaggttcattgtacgaaatgaattctaggtcccggatttcttaccatcaagttgtaaaaagccgcgattattgg  
cgattgtagaattctctatgatccatttggaaatctttttgttagactattttgttccgagatgcttctgcaatccttatttctatcatctatgcaaacgagga  
gaatgcaagggcagggcgagaacaataaaggaaacaaatccttttagggggatgctggtcttctaatcctctattgggcacaagaaaaagcctttttgcctttt  
cttgtgctgatttcttctgatacgaatattttcttcttctcggcaagattactatttcttatttgggtctgcttgaaccttttgccttaggttcaggcgat  
gtatggacaaaaaggggaaagaaaatgctgggggacaaattttggaccaaatagaattgctgacttctcaattaaagttcaatttagaacttacagaat  
tgcaaaaaaacggatacttccattgaagcgtgttttttttaggctagttgagtagtttaattaaggtttattagtttactctaaatfaaatcaatgattacaag

agacttctccggggaataaaatattgatcctcgttgatccttttctctcgttcataaaagtgaatfaatttcattggcgagggggtataaatcaactgatgga  
ttacttactaacattattaacaacaaaatataacaacaaacgaataaafagagggtctgaccatcagagcaaaaggcttttctttgtaatttttacaatcaaaata  
ggaaacccgtttgtagttaggaatagataaaaaagtcgggtataagagtaagaattccggcggcctttccgcttaacagataaaagggggtaaggaccg  
ctaagtcttatttttcatgtttacaacctgtccctcaactactatagatgacccaatccagaatgaaccgtaaaagaaaacactattaaccaatcacgc  
aataccggttacgtactatcagcaaaagggaattctccagtagatcggccattccctactttctccacatftttatcaagtgatgctagacaaaaaca  
gtcatggatagttataagatggtatcctcctcaaatggggataagagaattcttactacttcttcttctcaattgaaagaaftttgaaaataaaacgcaagtac  
aaaaatgagtaataaaccagatagactgtgtacgattcaacttttctcctgggtttgattgtgcatagtctatagtggatttggtttatcgttggatga  
actgactggtgatattgatccaagaaaaaacagtagtgtagcagtagccgtgaacagccagccatgcaactgtaaaaatagataggttcgtatggtcattg  
aggcctcctaaaaggactactaaattcagtggtttctaaagaatcaaacggctggtttattaacggaattccctgtcggcctttctgtaatactcgtttggcga  
ggacttcaaacacgtcacaagtaaacccgtactgacaataaacaaccggcaatgaatagggaaaggatagatgctatgaataaccagatcgaataactggt  
aataatcagcaaaaagaacgttctccgtctcagacatgctgagcctcccaatftttgtacatcaaaaagggaattgattccgtaaaaagatgggatcaaccag  
taaatagaanaactgatatttcattctgtgagattgcaattttgtaccaaggtgtattttgagataccaaaatagatagctatcctcttaggacagcaactcgt  
tctgcttgctcgaacagaattctttttctcttctgttctgctatagggtaaagctatagttatcaaggcatcaatagaaaactcaattttgaggctcactta  
atfttcaccggctcggatcgaatagtagaataaattcggataagggctcaagatctgggaaaactaafttgatcaacaggtttggataaagaatttaggaaag  
atattcttactgacacaatacaaaagagaagtagatcgaagcgtatcccttcaatccttcccttaaaatgattggtgacataataataactaataa  
atagaaaatcaaatgtagaataactggtatgaaagagagaaaactcttggaaaatcaagattcgaataaaccttgcctgtttactaaccttctgaccaactgc  
aagcgtggaactttgcaagttctaggttccgaaatagtgtaataaaagaaaggtctcgaatcgaacttgggttgtaaaaaggaaataaaaaaaagtaaa  
ttcaggaaaatcttcttttttaggagaccctcgggggtcgtggaatgcttcttctccttattccataggaatacaatcaatfttttcaactgggggttagctgactag  
tattgactgtcgtccaaaagaaggttataatcatcctattgaaaaagacaaaatagaagaaacttttcaaatcaattccttattttactgggttagctgactag  
ttcttaataattactttactcaattgacagattacacagcaaatctctgtatcggaaatagggactcatgcccatctgatgaatccattttcttacactctgactca  
ctctatctgtttttagtattatcaaaaatcaacgatgaaatgaatftttccataacttaggtaagtgctttaccaacatagtagtagtaaaaaaaaaaggaaatcaaccct  
tctcttactataactgattttctggtttctatggctgttcttaactcaaccctgctctatftttgctgcaacaagatagctttttgaaatgaaatgaaataa  
ggcagaaaaaagaaaaatctcttggattcctggtattctacgcactaattaccaattcttttcttctgctcattgagattcgtgataatagactactatgaggata  
aatcgtactccttttttaccctcgaacaaatgaaatgatgaaatftttctatttggaaatcgtcttaggcctaattctacttttagcgggattatctgactgcgtg  
ttgcaatacagacgtggggcagttggtcttcttattgagtaatttttttattgacttccctctctctgctctggaggaggtcaaattggaattgcaattgtttgta  
agtattttccctgcttgcataagatagatggaatcacgctctgtaggattgaaactcagacatgggtttggagaccgcttctaccgaactgaactaagag  
cgtttcaaaaatcaaatcctttactcctaatgtgtctacgtacgtatagttcacaaatfaaagtataaccgcttcaatcgaactcactactgctataaaga  
agaagaagtaataatggtaggtagcacaggtttgaaacctgtgactttgtacccaaaacaaacgcgctaccaagctgcctacatccctttcacaattgtgtaca  
atgctattgatacaattcctatctgtttccacatcctaatftttctgtcttttctctatagagaatcctctgtcatttctttttgctctataatcaaggaatggtat  
atataaattcaactaatttcactataaaaagaagattatcctgtgaaatcctataggaagggtgtctttttctgtttttagttcggaattctgctaacaaaaa  
aatacaaatgatcctggcaataataatctgatcatatagattccaataaggaaggaggatttcaatgctgggataaaaaacatatactctgtagaccgctgctaa  
gtactctatggtttggggcttttagcaggttattgatgaaatcaatcgtttttccagatgctttgtatcccttttttcttctagttggtgctatgaggaatagatt  
cttctgacatgataaaaaattccacttttcaatcccttttagtataagaaagaaaagaaagaatagattgggttgcaacttagagctgataaaatttgtga  
aatctcattttgaaaaaagaaatcaatfaaaagcagatccaagctaaagctagggcctcagaaatcagagcatagaagaggtggttgctactaaaatgaaag  
gattttgctcaaaaatcttgaatttgacaaggtgatttccttaatttttcttatttttacttaattgaaaaatctcaaaaatfttttctaatgattttcttctct  
cttctgttcaaaaataggaataaagaaataaagtagaagaatgaaatgaaatcaaaagaaaagggggatggttcatggcaagggggaaagatgttagaatcag  
agtattttgcaatgtgtggttgctgaaaaagggcctaatgagagcggcagggatttctagatagtagactcaaaagaatcgccacaataacaccggacaatt  
agaattaaagaaattgtgcttattgtcgtaaacatagcattatgccgaataaagaaatagagacattgtgctgatcttcaaaatgataaaaagaataa  
tcttaataattcctattatataagacatagatagaatacaaaatacaaaatcaactgctgatttccatagataatatttctatgatcagggtattcctatataat  
atggacaaaagagagacttcttctggtcctaaaatfaaaaaatacaaaatcaattttttcaattfaaaataagaaataatcgtatacatcaaacacccttt  
cataaatcaaaaacttttcataaatacaagcaaaactttcgtataaatacaaaactttcgtataaatacaaaacttttcgcaaaccaaaacttttctgtagg  
cgtcctcggattggccgggggtatcgaattgatatagaacatgagtttaataatcgttttagtaacaagaaaaatattatcagagcaaatataagattaac  
cttgaacaacaacgattaaattactcttctataaaacaggctcgtattttacttcttaccatttctgtaactatgagaatgagaaacatttcaagcccagtcatttcaat  
aattacaggtcctagaccgaaaaaataagacattctcctaaacaaaaagtcaattccaatgaaacttaagaaactcaaccagactttaaagaacaacaat  
cggaaacttaagttccgattggtgatgttttattcgaagggccagactatataaagaaatgaaatcaatttagattctggttggtttataagaaaacaaatggggaa  
gaaaaaagatttttatttattgcaacatgctcgttgattcctaccactaattcatttattgtattctcccgggttaccctccggaattcttttaattattctgtat  
tactttttatcccttaattgataattttattttattggaaatcgtgtaaaagatattttgatttaatacagctactgtgcaaggttttacgattaagaatcaattcttctgtg  
aagattggtatataattactaataatcgaatactttattgctccggtgctgtttatccgactgatccacaacgccgaaaatcccttttcttactctatctc  
atgagaggaacaacgctcttctactgttgatgtaactcgttaaagcttaaatgagccctcaaaagtggagcaaatgaacgcaattttgcccgtctctccg  
agctatatactcgcggaactctgttattgaatcaatcaatgaaactaattgatttcttcttcttttagccatcctttccattatacaaaaacgaattattc  
ccatataaaaaatattagttcaatggcttttctactataacctccaaaccacattttcttctactccctcagttatttcgcagataactaaaaatagtggttccat  
cgtttctatggttccctttaaaccgagcgaggcctcctataccggagccctttcttctattcattcaaaagggtattgtgaactgtatagttcacttcttggccttact  
atcattatagatgaaatagctcttttcacataaagattatcctacatgtagcggcaattaaatgaaagtgctaaagtagctgacccctctatgcttatttaagata  
aaggagcataagccttattcttttatttacttttctccgcttaataatgaatgcccttctaccatgggggaattgcttatttcaatcagactagattgatttgcacca  
aaggaaaacagaaattcctataccgtagaacatcaggatagagaagcctctcctattcattgtagccgatcatggatactcaaaatgcttatttggtaaccat  
gatccgaacgagtcgacatacacctagcagatttctccgacgctgaggacatccctaaagcggcgcgatttctagcattctgattggtgcttctgctttctaa

taagttgntaaaccgtggcatgctgtatgfatatagaaaaatggattggttagatc gatctaacctgaatgattgatcattatgaagtatttccattaaattgcataaaa  
cccgaatttaggggtgaataaattacaagaaatctggccactaccaatcctaaacatttctgaaaccacactggatcagatcgcagtgctcgtcaagcatttcat  
cccctacaatatcgacaagccataagcfttggcttcgctgctgacataaaaacatcccttccatgcttcggatacaacccaaaaaggcttgcctgttcttagtgc  
aaacccttgatcatttgcgaacttgtgaacttccacttctagtaaaaattctggtgttctgcccgataataagcactagcaggttggtgaagcataatcctcgc  
gtgggggaatgctatagcfttgggttctcctcaagcagaatgaaggacccatggacgcggctattccgagcattatgatatatctggtgtcaccgttgg  
catcgtatcaaaaatcgcatttctgagattaaccaccggcgggggagttataacaaaaaatatcctaattccatctctatactgagatataccatgagacctg  
taatatgattcgtgacctcgaacgaatcctgacctaaaaaaagtgccttctcgatacataacattgtataagtcacccaagtcgcttctcatctccgggaatcc  
ggtaaggacttfttggaaaccaatgggcataattagattaataattaaattaaagtaagaaactacatttaaatggaaacgtaagaatggaaagaaagaaaga  
atccgcagtttattgtttacttttttctattctatatgaatactatagattctattaatactagattgaaataacatagattgaaagattatacatataagtaggataag  
acagattgaataaagaaaaaagaatgggtgattcgaactaacaacaaagagatagggatctattctcgtttttccaaataagccaagctgccattgcatattgg  
cacttctcagatagataagatgcttcttcttcttacgaacagaattggccttcttattttaaaggaatgaaataaattacgcttctcagacagaatcccctag  
aagggttaggcatatagatagtgatagcttggcaatgcgataaaaataagtgacatcgtgctatttttctgctaaaggggtatttccatgggttgccttgatc  
gtgtcactatgctgattgaatgatccgggctgattgcttgcgtacataatgcacacagctctagtttctggttgggctggctcagtgctttatcagaattagcgg  
tttgatccctctgatcctgttctggatccaatgtggagacaaggtatgtcgtcattccttcatgactggttaggaataaccaatcgggggtggtggagtattcag  
gaggaactgaacgaatccgggtattgggtatgaagcgtggcagggggcgcataatgtgttctggttctggcagctatcgtccattgggtatattgg  
gacctgaaatattctgtagcgggacgggaaaccttcttggattgccaagatcttggaaatcatttcttgcaggggtggttcttggcttggcgc  
ttcatgtaacgggttgtatgctcgggataggggtctgatccttatgactaacggaaagtaacagctgtaaatccggcgtggggtgcagaaggtttgatcct  
ttgttccgggggaaatgcttccatcatttctcagtagtctgctgttcttggcagcttctgagttgcccgaactatggtgatgggtcagcaactaccctaatg  
cgtatggcaatattgaaactgacttccagtagtctgctgttcttggcagcttctgagttgcccgaactatggtgatgggtcagcaactaccctaatg  
gttggcctactcgttactcagtggtatcagggtacttccagcaagaaatatacgaagagttagtgatgggttagccgaaaatctcagttatcagaagcgttggct  
aaattcccgaataatagcctttatgattatattgtaataatccggcaagggggattatcagagcagcctaatggacaatgggatgaaatgcttggatg  
gttagacatctatcttagagataaagaaggcgcgaacttttctagccgtatgcttcttcttggaaacattccggttgggtgatgaaaggggaattgtg  
agagcggacgttctttagaagagcagaatccaaatagtgftgaacaagtaggcgtaacggtggagtctatggtggcgaactaatgagtaagttattctgat  
cctgctactgtaaaaaatagcgaaggcgtcccaataggggaaattttgaattagatcgggctacttggaaatcagatggttctcgcagcagccaagggtg  
gttacttggctatgctacttcttcttcttcttctggacacatttggcatgggctagaaccttctccgagatgttttctggtattgatccagactggatgct  
caagtgaatttgaacatccaaaaagtcggagatccaactacgaggagacaccagctgagccgacttgggtatcttccctctcttcttattgattgacat  
gggaaacatctcccactcttcttcttcttcttcttcttcttcttcttcttcttcttcttcttcttcttcttcttcttcttcttcttcttcttcttcttct  
aatctatggaagcattggttcttcttcttcttcttcttcttcttcttcttcttcttcttcttcttcttcttcttcttcttcttcttcttcttcttcttct  
taattgaagtaagaagtcctccagatgggagacttcttcttcttcttcttcttcttcttcttcttcttcttcttcttcttcttcttcttcttcttcttct  
aggcataccagtaaaagctacaagtaaacagatagggatggcactaaagtgtcttcttcttcttcttcttcttcttcttcttcttcttcttcttcttct  
tgtattacaactacaacggaatagatacaagtaacacaaatcattaaatggaattatggctacacaaccgttgaagatagtctagacctggaccaagacaaa  
ctcgcgtaggaattattgaaacctggaatggaaatgggaaagtagctccgggttgggggactactcctttatgggggctgcaatggccttattcgcggattc  
ctactattatttagaaattataaattctccgttactggacgaattttaaataagatttctactaacgaaaactacgaagtcagattttccatccaaaagacctt  
tctactttagctcatattcttagacattctgtagttcaccgttggaaatttttgggttctggtatctctggaatagagtgtgactgttagaatttgcctattgataat  
acatagaaacacctgttactctatcaagatgatttaattctcggatattatttcttagtatctggaacacgaaatagatagagtggatcaagaaaaaaatgaa  
actatgattcatattaactattcagacctcgaaccagactgaaaaaattcaagtagtcttaataaaaaataaaaaagaaaatttcttccatttcttggccaaa  
aaacaacttttctctcatttctcagctcattacaccgattcaataatgatcatcaagcgttcttattcgaagaaccttgccttctttagcttgagactcaatcat  
cgtggctctagatgaatcaaggtttaaattgaactgattcatagatcgaacaagataaattctaccagaaaactactcaatttcttatttatttctatgtaaac  
aagagtaaatctgattcgcacaaaaaaagaaatcctaaatagggaagagaaaaatcaagagcctctaatgatcaacttgggaaagaaagatagacgag  
ccaactgagatttggcattatcacaagaagaattctggatttcttattctatcttcaaggcaaacgaccaaccagtgctgatgaagtttgaacct  
ttttctaatatccgttgaatttctgtgttctgtttgagccgtacgagatgaattctatatacgggttctcggaggggggttgggttagttacatctcaataaagta  
tatattggttggagaaactgctttagactcaggcaattcagatgataaactagtaaatatgttccctctcgtcaacataatttattttaggggggaaattacacttact  
gtttctagtaagaagtgctaccggttggctatgacttttactatcgcccaaccgttacagagccttttctcggttcaatacataatgaccgagggcaacttgggtg  
ttaatccgatcagttcagtggtcagcaagtagatggttctaatgatgatcctgcacgtattctgtgtatctcacagtggtttaaaaaaccccgcgaatttaact  
gggtcactggtgtgtttagctgtattaactgcatcgttgggttaactggttattcttacccttggatcaaatggttattggcagtcacaaattgtgacaggtgtcct  
gacgcgattccgtaataggatcacctttagtgagttattacgtggaagtgtatgtgggtcaatccactttagctcgttttattatgattacacatttgtacttctctg  
cttactccgtatttattgtaatgcacttctaatgatacgtaaagcaaggtatttccggcccttataaggaaggcatctcagagagtttaattctcatatcatactg  
ggtaggttgggtatttcttctcaacaacatgggttattctaaataagacatgctatttagatacttcttcaactccgaactattgtgatacaataatacaaatagt  
aagttattttacgaaagaaagaaaggcgtattgggagtgctgactgaattattgattggccatcgagatagagattggatctccacattgaaatcagac  
caaaggtctccatccaatcaacacgtaagtcctctgctagtaaggtatggctgcttacttgggagaaatattctatgatcactcaacctatgcatccatg  
aagaggtccgtaagatccatagatgaaatggaataagctatgtgacatgatccaattcttatttactacttcttattatagatgaaatgattcatttctt  
tgcactgattcgtatcgaatactatcggagtaaaagaggatcaaggaagacgtagcctaaacttttattttattagtaacaagtaaaacttcttggac  
gaagaacttgcataattgggggggataaataccaactaatcaagagacgcgagacaatccacaaagcaattgatcatgataaattgtaagcccacttggatatt  
gagcatttaccataagagtagatttctcaatgaatggttaggtgcaactcggaaatagaactgataaagcttttcttacttagaccattgagccattatata  
ccttattctattatgattcttctacggttttttcttcttcttcttcttcttcttcttcttcttcttcttcttcttcttcttcttcttcttcttcttcttct  
tccaatacaaaagaaactgactaaacgatcctgtattaagagcaaaatagctaaagggatggacataattattacggggaaccgcgtgcccacgatctt



ttatafataftttccagtagtaattctaggactattgcatgfaatgtagggttagcgggtctcagaccgcaatgattggtggaaccggcggatccgttgcaactcctctgga  
aatattaccggagtggtactcttccctgtgttcaatactccgfacagtagtaataaaggattggttctcttaagggttctgtccgacggcgttattgacagtag  
ctttctagagaatgcaataaattccaaatccattctgcgccagtagctacaaccgttttaaacggtactgagtagctcttggtaggtattggagcaacatta  
cccattgaaaaatcttaacttttaggctcttttagggattttcaggttgaftcattcaatctggaagtaccgtgcataggtatctagaaaatgttactccaagtgaactt  
ccctagatactataatctattttatgatccattctgcgaaatatagattgtccaaagatgcaaaaattgtttctttttttcttactgaaaagaagaagag  
gaaaaaattgcaatggatttaaaactagaacttattcttagtaaatccattgggagatgcttctctagaagtccatctgtttctctctgcaatgcaaaactgtcaa  
ttctcatagatcttctccgtcttactcaaaaggtccaatagtgatggatattggcccttttgagacaattatacgttctaagaagcgagtctaaatgatcaataaaaaa  
caattcaatggaattctttttgtttctttagattagtaattcttttgaagcctaaaagggggaaagtaaacctgttttatttcttgaaacgagtagacctcttccctg  
tgtgaaagaaaggagaataaataaatacaataaacagaagcctcataaaagcgttccitagggggttaaacctccattgttccatatttctgaaaaaagtattctat  
ttgcatftccattcccaagcaaaaaataataatccattctgaacagccatgatacagcatctataggataacttccattgtgagtgtttcttctgacttccgtgtg  
atfaccgcgatctcttctgacccgtaactcaatcgaaatccgtgggttctgtcaagttagctatagggtgtccgtatcaaacgatttctaccggaagcggtaagata  
tatctggcagttatgtagtagttaggacattgacgcaaaattgatggggttcttaactccatagagattacttcaatacaatttctcaaattagtaaaatcttctgaccga  
ttctcaatccgtctatgtagaatctgtgacggacgtcccaaaatgtgcatgtgtagatcttcttctcgaagttaaagctctcgaaggaacatccaa  
cggataccgctgacttttaagcggggacagaatgaacgaccataataaagacgctactatctacttattcaacacacttccactgtaggtttgagtgatg  
cctgtactcctctcgaaccatagactagtagtattatattgatcttgaactgcttctgttaaaggggttaattcttttacagagctcttttttaggaggtcgaca  
ccattatggcgaatgggttacatgcgtagataaactaatctgacaccattttagcaatggctgtaagcggcatcttccactaccagcaccctttaccatac  
ttctgctctggtgcaaacctgtagcaatagctctacagctgtctttgaccagcatagggtgatgctttcttgagcttttgaatccacaagtaccgctggagacc  
agaaaaaccctcgacttgcggaattgtaacagttataatgattgtgaaactagcttgaactgaataactctttgtttattctagctgcagactcctccgtaaacata  
acgcgcatcttaccgcaaaccaatcgtacttctacgtgaacaaattttgttagatgctttgtcatattttattctcataaataatgagttagaaaatacaaaaagaaa  
aaaagatacaaaagatatccggttcagggtaaaataatacttacttgaattttttttgttaattggaacttctcggggtacttttttttacttttagaaagtcaagtcttt  
ttcgaaagattaccctgtctttgtttctctggattggaacaataactcctaatctgacacgactacgacatttctcaaaatfttaccgaaagaaagct  
cttatttctatttccgtatctctttcaaatatgaattacttctttgaaaaataagctctttgtttgaattttagaacttgaatttttaccctgaaaaaaaaaagaaaa  
acctaacccttgaatctttgtatcttcaaatctctggtatctctcagcttctgggtacgcttgaactctatggggaagctataaattatcagcccttctgttaac  
taacgacttactcaattttgacctatccccatcagtagcttctgtagaactagaccgacttctctgaaatagccaggatgaggtctcttctagcgaacg  
cggaaactctctgttaggcttccataaactaaacctcgaaagtaattttgtcttctcggggttttttctctcttatttcttttctcatatttttttctcttatttt  
ctttttttttgaaaaataaaaaacgttattttttttgaaaaataggaaatcagatagaattttgggtactataactatagggtggcgaatccgctatagcggg  
gcgattaccatataacataagacttcccccaattctgtttagctgagcttctgatctgactatccctcgaagtagaaagaatgcaattccattccgccca  
aaaccttaggaattcctgatagttgcataaattcgaagccaggtcggctgacgctttaaaagggttctatgcttataattccccttctagcttctcttttgatctc  
caaagtgaaccaagaataatctgttacttctgatgttccgaaacttcaataaaacctcctcgaagattttaacaaatgttttcggaataatttgatagactac  
ccgaacagttcctttttattcatgctccgcttcttagaggttagtaaatcagcaatgctcctgtccataagacttaattctaggttctcctaattttctataatca  
acatgttctctttttcttctgtttgtattcaagcatataggaacacaaatctactaattttttttttgatctataatctgtactatattataatctcaggagcaat  
gaaactattttgtaaaatcaatttctcaattctcggcagctcgcgcaaaaaacgcgagttcttggatttcttggatcaatgataaccgctgcattgtctc  
gcgattattataaccgttctgaatttgaacttctacatgtactgacaatcagctcgaattactcggatcttcttagagcaatttgggcactcgtctttgattacagc  
aacataacatcacaatacagagcatatcgtgattactagcagctcctatgactcgaatcacatcaatttccgactccactgttatctgtctactttaaagggctg  
agggtgaactatattttgatttcaattgttattcaatgcaaaaggatgaaagaaatattgcttccagaagaaagaaacctgtttttatcttcaactactttttggg  
ggggttataatttcaaccgaagaaatgactcgtatggcattttgctgcgactatgaaatagctgcttagctacagtttccgactcggccttccatataaagta  
ttcagctggtttaaacggctaccaatattcggggatcccttcccgaaccatacgtgttccggtcgtcttattgtaacgggttgcgggaaatatactgac  
cagattttccaccacgactgcatatctgtctattgtcttctgtcctctctctgcctccgcaatcaaggtgggtcaagtgcttgaagagcatalctaccataa  
caatacaatgctcgttaggattttccctcattctcctctctattgttttaccgaaactgcttttggggttagatgaggttctctctagttccatctactgcaaa  
actggacagagaggttcttctccagctcctcgcgaatcaaatgagaagggtgcaaaatctcttaattccacaatattcaaaatattcagcatagatacacaat  
aggaaaagggttagggttttaattggaatttataaacttaaaaatataagcaagaagaggatcagaataatctagatgtagattttattctataatctatattta  
atgtaattctatttttttaactccttttttttactccttattgaaactgcggtaaagtatttcaatcaaaaaatctcggcggcaaatatttactcttctgtctattgtta  
attcataaccttatacaataagacaattttttggtttgtccgccatcccaccaatgaagtattgggattcttttcaagaaaactcactaggttctgtctgtcc  
cactgtcttcccttaagttaggttgaatctcgaatggagcttccaaaaatcttccgagtcgaatttctcagtttataaactgggacgcttcttggatttctgaa  
attgtatttctgttcaatcaatcagatttcgaattctctgtatttttattatattgatcttatacattgtctttatgatgtaattcatagaccatataattggaactct  
atcttctatttcttcttcttcttctatctccttcttctacatcctcctttctacatcccccttttattgtttctcacaactagaatctatttttttaaagaaaaaattgcaattgctacacgta  
tatgatagattactcattatgagatgattattcatatagtgactgttcttagtagtactcagacaatgcaagcaatggttggttattgtcattttctataattac  
atagtaggttcattctatatttttttaacccttttgaacctataaaaaaaactaacgagtcacacactaagcatagcaattttataaagatttcaatftttatnaat  
cttatagaaagggtgagaatttcttctttttcagggttttgggaaataagcttctgctattttttcttattactgaacagaatgggaagacagggttgggtattctt  
cgtctacgaatacacaattttactcctaatactcctatagatgctcgaatggatagcagaataatcaattttagcgcgaattggttggagggaagctactctttttg  
atgattcggcagcgcgaatftcttcccgcgagacggcctgcaatfttacttttactccctttatctgttttttagttaatcaatggcttttttcttctcggatg  
aaactctatttttaattggaaagctatatttctgaagaatgttaggttctatagaatggttcttctactttccgatcccaatataagtctcgtttacagaatnaactctttt  
ttagatcttctcaatctcctgattgctccttttcttaataaattggggaatccaatggattatgacgtggattgtagcttcttgaattctatattgtaattact  
tcggaactggagcctgagctcattttttatattgttaattactcgaacttgaagctgctctctatttttcttctagcccttttcttattctttttgatatagtttgatata  
ttccgtattttttctctctgtagaccctcagaataattttggttgcgcaacaaaggaatgtgtatttgggtgtaccaagctcgaaccaagtgattattttttg  
tccatatttttctatttcttttttaccgggaatcaaatcttagatgtagtaaaagattttctgattcttactatattgtagcaattgttatgacacatggtttttttgat

ggagaactacgtcctcagccccgaggtctgaatttattcataatgactcctactgactccgctttagtgatgaataaattgctttgtcgaatccctataatgagtag  
catttggctgctgccgaataaaccactttaagatgggataagatgctcgataaggcatgaggtcaatacacaacagttctcgtagtaacgccacgaatcctacc  
agaactctttagtacttgaacaggacatgtggtatgctgtttgtgcttgaacaccgctcgaactaaagtagacgacggttgtagtcttctgaggttccctagccc  
acttctcttcttctactaggggtatactttaccagtttgaactgtcataaataaggttatccccgcttactattcttttttttttttttttgaatcttctattctgaattca  
gtaacgacgagatttagtatctttctgacttccataactcgtgaatgccgagttgtagcaatccccaattgacgactaccataggattgtatgtaaataggg  
atatgtcctttccattatgaatcgcgattgtatgccaaccattgctgggtagaaatgctagatgcccggaccacgttactattgttcttctcctcctcatattgaccttt  
ctattttgccataaatgatgagctacaaaaggattcgtttttctgtcagagctgactactccttttttccattttaaagagtggtcattcgatgtccaatatctcgtacg  
aagtagggaggtcagaataaatagaataatgatgaatggaaaaaagagaaatccttttagctgataaagggcggatgtagccaagtggatcaagggcagtggtatt  
gtgaatccaccatgctcgggtcaattcccgcttcccatccattattgcaattccaaaatgcaatttccatattcctagttacgatttactacggcagcga  
gaataaactatcactatattttcttcttagttcttccaagcgcaggaatacccccaagggttgggttttttctaccaatgggggcttccctaccgcccc  
catgggggggtccacaggggtcacaactaccctcttactacggggcgtttacctagccaacacttagaccggcttaccacaaacttttgggtcaccacaacatt  
accactgttccgactgttggtaagcattttggataccacaacggacctccccagatggtaacttaaaagtgcccatttacccttttgaatcagtttctgctacagc  
acctgctccttagtaattgccacccctccacgtgatttctatgtatgtatgcccgtgctaaagggcctacatgggtgagtagattctttctcctcaaaaaacc  
ccttccaaaactgtacaagcttctcacaagcctacggccttctagatgtatgtacgatcttagacagatggatcttatgaatcgtatgaaagtagaccacatgag  
ggatataaggaaaggaaatcacaactcggcaatcgtcctatgtatgtacgatcttagaccagatggatcttatgaatcgtatgaaagtagaccacatgag  
cgaatgactctatgaattacgctgatacttctacatattgggtaacgtaggagacatccctttttccccgggggttaattaccactgcttagctttcaattcgc  
tctgacctcaaatataatgtgaataaccgctcctctcttgaacaaggggctcctccggttctgctcgtcctcaacaatttctctcctcattaccatctct  
agagtcataaatttctatgaggaactactgaactcaactctcctgctccgttactcaacagtttctgttggaggtctatcccgtaggtagtcaaaatggatcagtagc  
gatttctaggttctgtcgtaaacctaaatgggtacttcaactcgtaaatcaatggtcaaacggcactcaaaaggtaggggcatttccatgatatggaaactttgtacca  
gaaacaatgtagtctcaattatagccctcgggatgtaaaatataccttctcaccatccccatagttgatgagacaatgtacgatttccgattagggtcgtattcta  
tgggtacgatttaccagatattttgattccgtcgaatacgttttaccggtataggcctttagctcctccccctctatgcttccggtaatgattcctctggaattac  
gaccttaccacaacgggtccctgatcaaatatttctgtgattgatttccacttgcctatctatggttccctgctgctcgggataggtgtttgtataaatgt  
ttcggctgatttattagatttctttagtttttctctatctagaagtggaatagaaataaccgggtgaaaggtaatgatcacgctctgaatgcattgtatgctctagaa  
tagggccattcttacccttccgggtatgctgatttccacagctactacttaacacaaagaaaggttcgacccaatgctttatttctgtcttagtgaatcccg  
attcgacataaaagatattgatttctcacaataaacgaagactttttctgaataactcgtatttatttaccataaacgacttccctctatgctctgatttcca  
gtatcgataagaatcaggttctattgttctattgtatgtatgaatacacaacattcgtatgtatggatgatggatgagattccatggatagagagccagttcca  
atagacttatggaacgtccggctcgtcgtatccagcaggaattgaaccggcaatfaccatattagttgggcgttaccattcagccatggatgcttaacag  
ggatcctgtatcgtataaaccaatttctatagaaagacatcagataaagaaatgaaatcgaataatcggagatggcaaatcggagatgactatgaaaa  
cactctctggtatcctcgaattgaaagagagattgagaggatccagaaatcctatctcgtatttggaaatggatcacaattctattgagctgactatagttcattt  
cttttagcaagaatgaccttgggtatcaaaagattgaacaaccgggatccgttacttatgatacctagttgacattgataacaaggatctaataatgaattatgattaat  
agatcctctttagcagaagacgtatattcctgctcactatttccaaaacctgtaggggctaatcgttttaccattcctcagggaaaatcctttctgctcggct  
agccctatcgggtattttagtgataggcttataggaaactggacgatcctatttggctcaaaactaatgaaaaatcctatttcttcaataaggtacgaggcttctat  
tccacaagaaaagaaacgaaagcaacttttacttctataactgggggttttacttggaaaagacaatgtccataactaaaggattcgggtccataaccagagttc  
cagtgctactagattttagcacttagcaacgaggccctatgaatagacatagaaatttggctcgggaaatcgaatgaatcattgagttgaaaaagggagcaaaagaa  
tgaaaaagacgagacttactagcttctactctgtggttctcgggttctgttcttattcgggatcttcttctcctatggttctcactctcgaactcgcgatttccgca  
gagaaccaaatcaagttggtgaaagatcattggtggctggcatagtagtatttaccattgcaattcgggttcgaatctatccgatcttattttgtcacaagaacg  
aataaaaccttctgcaagcccttatgataagcttccctggatcgtggaggttcttccacggattgggatcgttctgatcattccttctgactctatttggcg  
gcgtcacaagatcaaacagggtatcgaacaaaaaggggaaattcgtacttcttctctcgtcgtgtaaaaaaaaggttaccgagagcaaatagaggttgg  
gatacatctatcttctgagcaaccttggattcttaagaccaccttgcagtaggataaccgtctgttgggttcttattatattctcctcagggatttttaggat  
cttctacgggaaatgctcattgaaatgcaatcattcctgattatgacttatctatctaatgtgataatctgaaagtgaatcgtattccatgaaatgatactctaatgtgata  
caccatcaaggcattcgtgaaatgcaatcattcctgattatgacttatctaatgtgataatctgaaagtgaatcgtattccatgaaatgatactctaatgtgata  
atggaatatagacaaaaggtggagcttggagatttctgactcctgctcattagggcctgagtcagacatcaaatagccttgatttgattatccctagggacacctat  
atgatacaaaatcaaaaagatgacaatcgaatttctgattcaatagaaagcccaagagggtgcatatggtaccacaaataaggatagatgataaaagcag  
gtctgattacacattctcaatcaatagaatgaaaggactggggatttctatgaaacagagtatcctatttccatagcctcgaatgaccttctcataataaga  
atgtgcacggctgtgcccggatggaatgaactataatctgatgacgagtcgatttccatgattataagttcattaccctagcggccattcccattttggcggaacag  
atctactaattctttattccagtttagtaaggggatcttgaactaagaatagacctagcagctaaaaggggtatcctgagcaattgcaagaatgggggttattgata  
ttctgtgtagtagatgctacacatacagctactcaatcgtatggaattgttctgattaaaggggatcttataattcgcacataaggggttatttctgttctt  
gtccagctataaactgactatttttagataatgtagatagaagaacgctcgtaaaggagcttattgaaccaagaatataggcctgcttccatccacacca  
gaatagatagagtttccgaagaacctgtagtgaggaaggcctcctagggataagagacatagggcctaaaagagagcaaaaaaggttctgtgtataat  
cctgcaataatcgaatgttatcagttccggtagcagcaaaataataatgcaagcaaaagtcttagattcattggagatagaaaagcatataagttatcagct  
tgcataatcattttagctccaacatttccaataattacataatcgtattgacctatgacgaatgcaagcctacgttctatgctgttggatgaaatgcaagg  
gattccccatcattcgaatgataagatgagatttccagaagaagatgccattcgtttagagaataaaaaaggaatcggaaattcgcgtcgtgagctgaaag  
cagcaacttccgaagtaacagaagaagaacgactggagtggtgggagctcagagtcgaaaaaggattcctcgttcttctctatgcaaaaccgtcagtg  
gactttcctcgcacggctcctaatgataaaaagaagaacttcttcttctttttagttaccttctcgtatgtataagaccgaatccatttcttgaatc  
gatttccaaaaagaactactaatccttcttctgaggaactcctcatagtggtgtgaatgactgacttttcaatccttccgacttgggtccgtaggagcaagtcag

aaaggtgagaaatagaacatctgatttgattcgttccaatagccatgagatgatcatcttagggatccttttgcaacggatgctcctattacactcgtagtctcg  
aaggatgagaaccactatgtagcatctacgtcgataaftcaagcattgtatacgtcattagtcgattctttgtaggaactaccgtaataacgagctgcaaaatgga  
tctgtttatcataaagagattcgttctctgaccctgcttcccttaattgtattgaaacaaaagatcacaataaacttttgtaaagtctgtctgtgctggagtgggg  
atagcattctctctgcatatctatggagtttgcaaaaccacacctcagagatagatagaggtaggaattgtcgaacgaaccacactcttcgtagcgtca  
ggagtcattgatgaaaaggggctggggaagcctgaacccaagctctacgtgatgataaagcgaattgaaattcctgggagttatactttgtattgata  
agaccgtcacaattcttgaagctcgtatccccccagatgaacatatagccaagagaacctgaaccagaatagaagagcttccccaccatgagtaaat  
attcatagtagcctcattagaccgtatgctctctgtatataccagacaataggttaggaacataaactgaaacattctggagctacaagatagttataaatgtag  
caccacataaaaacattccccctagagtagctgtaaacgaataacagaacctgttatagccatttctgtacattcaatgtactctacggatagaggaaacataaaa  
gttgaaacataaaaataagaatgaaagattctgtgaaattgttcgtttggaaattccgaaagcctaattataggttctctccatcggaaacataaggccggtta  
tgcctattactaaactgttgaagagatgaaatagaaccaaggtctatcttttgatcagaggttaaactgcatcagaagaagaattaggccaaaataggatacatt  
ctgggaaaatgaaactccctggagagaagcaaatgaacgccttcataaaaattctcgtagaatcagaatgaaatttcatctgtacatgccagatcatgaatta  
gtaactgcatcaatctccgaaaagctccgattgttcgattttggaatggatattacggaaatcccatgaatggatcaaaccttattccatgctattccataagatt  
cctctttctattcttaagcaagccccgagagggctttagttgatcatgattctgtttctctttctttctttttgtttgttcgagaagatagctccgattctctcttattg  
attctttccgatcagatgtatggatccatgtgtctacatacctagattctgttcatggaftaacgaaaatgtcgaagagctctattgctctgccattctatgagctgct  
ccttttgctgatggcaccaccccccttggcagcactactaattcggaaactaattgaaagccataattcgaaccggacgctttgggatgcttctaataaccaac  
gaaatggcaagtgctctctgttttagatctattcaatcggaaacttccgctcgtatccttttattacgcttgttttactctatattgggagttactctacgtattgcttg  
acgtaaaaccaatagtgatttgttctgtctttgttgaatcttttccacggctcgtatagaaatgataagccaatgattttttccgcttctcataaacggtaaccacca  
tgtaactaatcgaattacgaaaaatggatcggatttgcagttcttttctcagtcacctgacgtgacatgagcgtgaaagaggtcgaagatccgtttctttataaa  
gggctaaaaaacgaatcactatttttggcttttggaccctatattgaggtggtgatctgaaagatagaaagatctccctccaaagccgtacatacaacttctacgaa  
tacggctttccacagaattctataggatctatgagatcgagttggaattcagtttactcactttaaattgagttaccggttccctcttttccccgtaggatcggaaatc  
ctgtattttccatataccatcaagctccttagtttccgaaatagtgtaagtgaaaagaagtgctcgaatcattgtctatttgactcggacctgttctgaaaaagtcg  
aggatttccgaaattgttgtagacggacaaggaagggaaaaccctgaaagaattccatattgacctggacataaagagttccgaatcgaatccttttagaaag  
aagatctttgtctatgtagcctgctccagctcccttacgaaacttctgtattgggttagccatacactcactatgttttagcgaattcactgacatcacaatgata  
caagcttggataagaatctacaacgcactagaacgccctgttgacgattcttactgcgacagcacttagggctctcgaataatgcgatactcaccgggtaa  
atccttaaccctctccttactaatactacagaatgttctgtaaatatggccaataaccaggtatataagcagtgatttcaatccagaggttaactgactctggcaa  
ctttacgtaaggcagagtggtttttggggtgatagtgaaaagtcgacagataagtcaccctctctgctctcacaagaaccgtacatgagattttacacctacac  
ggctctctgttcaattcttcgaaggatcctttctctgttcgagagctccgccctcttccactccgctccgaagactaactaagaccaatgagtcacgtttcatgt  
tctaattgaacatttccattatgattaaagagagaagattgtcttttaccacaatagcggatcaaatcagctctataaagaagaatcttctcgtatcaatccc  
ctggccctcattcttgagaatcagaaggatcctttcgaattcattcttctatttggaaatctgggctctctctctgactattttttttgtttattctttatttttatt  
tcgattttccctctctctctatccctatcctctaggtacagcgtttgcatcaatagagaaccttttctctgtatgaatctatatttccattccaatcttcccgaactcc  
caagaaaaatcccgaattggatcaaaaatgacgggtaattgtgagcttatccatgagggttaggcactctcaaataggaatccatttttaactgcttctgctgttgg  
tgagctgcccagatccttctgatgacatattgtgttgaagggatctatagatccgatcgttgcataagaccggcgtgtagcaatagaacggggaaagtatac  
agaaaagacagattctttcaattcgaattatctatatattagttcttttctatagatctatttctatataatagttatgtagtagtactattctattagttagc  
gactctgtgagttcttctccgtgatgaactgtcggcaccagctcctcatttttctctgtggaccaggagaaggggctcagcaggaagagattgtaccatgag  
agaagcagagaggtcaacctctcaaatatggaactggaattctgcaatgcaacgtatgtgggctctatcctgatccgaatgaatcagctttctacagaggtca  
atcttgcctattaggcaagagatagcaagttcgaattctgtctggtagacatggatttctattactatgaaatcataaatgaaaatgaaagttaattgggagg  
gctaccattatctttttctgtatgttcttaagaagaaggaattgtcattctatgttctgaggtctcaaaaaagggcgtggaacagatagaactctgaaatgaaa  
ttgaaaagaatgtagccccagttctcggaaatgtaagatcttggcgcaagaagaaggggcgaccatatactctgacttggctctgcttccccttttttaag  
aataccgagctgggttctctaccagatcgaatagaacatgctgaacaagatcttctatgaaacctgctcatttagatcgggaaaatcgtacagattttatg  
aaacctgtgctatggctgaatccatagtcacatcttctgataggaccgggtgacaattgaaatcaatttttccattatttactaccataatagttggaagaa  
agcccggaggaagggtggccttgatttctcggccttgccttagattcgttaattcttctctgaggggacggggaaggatataactcagcggtagaagaa  
ccttgacgtggtggaagtcacagttcgaagcctgattatccctaaaccaatgtgagtttcttctctgaggggacggggaaggatataactcagcggaatgataag  
aggctgtgggattgacgtatagggtaggggttgctatactgctgggtgcaactccaggcctaataatctgaagcgcagatgatacaagttatccttggaaaggaaag  
acaattccgaatccgcttctacgaaataaggaagctataagtaatgcaactatgaatctatgagagctgacgctgctcagatgaacgctggcgcctgctt  
aacacatcgaagtcgaacgggaagtggttccagtggcgaacgggtgagtaacgcgtaagaacctgcccctggagggggaacaacaactggaacgggttgc  
taataccccgtaggctgaggagcaaaaggagaatccgccaaggaggggctcgcgctctgattagctagttgtgaggcaatagcttaccaggcgatgatcag  
tagctgtccgagagatgatcaccacactgggactgagacacggcccagactcctacgggagggcagcagtgaggaaatctccgaatggcgaaagcctga  
cggagcaatgcccgtggaggtggaagcccacgggtcgaactctttctcggagaagaaacaatgacggatctgaggaataagcatcggtaactctgtg  
ccagcagcccggtaagacagaggatgcaagcgttatccggatgattggcgtaaaagcgtctgtaggtgctttcaagtcgccgtaaatccagggtcaa  
ccctggacagcgggtgaaactaccaagctggatgagggcagagggaattccgggtgagcgggtgaaatgcaattgagatcgaagaacaccaacg  
gcgaaagcactctgctggccgacactgacactgagagacgaaagctagggagcaaatgggattagagaccctagtagcctagccgtaaacgatggact  
aggctgtgctgactcaccgtcagctgtctgtagtaacgcgttaagatcccgcctggggagtagcttgcgaagaatgaaactcaaggaattgacggggcc  
cgcaaacgggtggagcatgtgttattctgatgcaaacggaagaccttaccagggtgacatccgcgaatccttgaagagaggggtccctcggga  
acccctgaacagaccgggtgtaagcggaggaagagagatgagccaagtcacatgcccctatgcccctggcgacacagctgacatggcgg  
gacaaaggtcgcgatctcgcgagggtgagctaactccaaaaaccctcctcagttcggattgcaggctgcaactcgcctgatgaagcaggaaatcgtagtaat

cgccggcagccafacggcggfgaatccgttccgggctgtacacaccgccgtcacatagagctggccatgttgaagtcattaccftaacgtaagg  
aggggatgcctaaggctaggctgactggagtgaaagtcgtaacaaggtagccgtactggaagtgccggctgacacctcctttcaggagagctaatgct  
tatgcttattgggtattttggttgcactgctcacgccccaaaaaagagcagctacgtctgagctaaactggataggaagctctttcgtttagggtgaagtaaga  
ccaagctcatgacttattatctagctcggaaacaattagttgatagtgatgagatccccctttttgacgtccccatgccccccccgtgtgtgtggcggcatgggg  
atgcaaaaaggaaaggatgagttttctcgttttggcgtagcagccctccaaaggaggcccgccgacgggctattagctcagtgtagagcgcgccct  
gataattgctgctgtgtgctggctgtgagggctctcagccacatggatagttcaatgtgctcatcagcgcctgaccgagatgtagatccaaggcacatta  
gcatggcgtactcctcgtttgaatcggagttgaaaccaaaacttctcctcagggagatagatggggcgattcaggtgagatcccatgtagatcaacttcta  
ttactcgtgggatccggcggtccggggggggcactacggctcctcctcctcagaaatccatacctccctatcagtgatggagagctatctcagcagagg  
ttgaggtcgtcctcaatgggaaaatggagcactaacaacgcattctcacagaccaagaactacgagatacccttccattctgggggtgacggaggatcgtacc  
attcagacctttttcatgctttccggcggtctggagaaagcagcaatcaataggacttccctaatcctccctcctgaaaggaaagcgtgaaatcttttcttcc  
cgaggggaccagggatgtagctagccataagaggatgctgtgataaataagccacttctgtctcgtactccctaaagtcactacgagcggccctcgtacgtg  
caatgggatggtctattatctcttctgactcgaatgggagcagagcaggtttgaaaaaggatcttagagtgcttaggggtggccaggagggtctttaaagc  
cttccctttctgcccacggagtattttcccaaggacttccatgtaagggggagaagggaagacacttgaagagcgcagfacaacggagagttgtatg  
ctgcttccggaaaggatgaatcgtcccgaaggagctattgatttctcccaattggttggatcgtagggggcgtgatttactcagggcgaggctctgttca  
agtccaggatggccagctgcgccagggaaagaataagaagacatctgacttctcagcactccacttggctcgggggatagctcagttgtagagct  
ccgctctgcaattgggtggtgctgattacgggttggctgttaattgccaaggcggaatggtagtagtctgtacctgaaccgggtcacttttcaagtaatgggg  
aagaggactgaaacatgccactgaaagacttactgagacaaaaagatgggctgcaaaaaaggtagaggagtaggtagggcagttggtcagatctatgtagga  
tcgtacatggacgatagttggcggcggctcctagcctccctcacttgggatccaggagatcaggttggcccttgcgaatagctgtgactatc  
tcccttaaccctttgagcgaatgtggcaaaaggaaagcaaatcctggaccgccccattatctccaccctgtaggaactacgagatcccaagcagccct  
cggcgtccagggtcagggaccgacctagaccctgttcaataagtggaacacattagccgtccgctcctccggttggcgagtaagggtcggagaaaggcaatca  
ctcgttctaaaaccagcattcttaagttaagatcaaaagatcggggcgaaaaaggggagagctccccgttctggttctcctgtagctgattccccggaaccaca  
agaatccttagaatgggattccaactcagcactttttttgagattttgagaagagttgcttctggagagcacagtacgatgaaagttgtaagctgttctggggg  
gagttattgtctatcgttggcctctatgtagaaccgtcggggaggcctgagagcgggtggttaccctgtggcgatgtagcgggtcagctcgttctccag  
cccgtgaacttagcggatactatgatagcaccgaattttccaattcggcagttcgtatgatctcgtacatgagcgttgataagatccttccatttagtagcactt  
aggatggcagatgcctaacgttaatggcgagggtcaaaagaggaaggcgttgggtgatacctaggtaccagagacgaggaaggcgtagcaagcagcagaa  
atgcttccgggagttgaaaataagcatagatccggagattcccaatagtgcaacttttgaactcctgctgaatccatgagcaggaagagacaactggcgaa  
ctgaaacatcttagtagccagagaaaagaaagcaaaagcgttcccgtagtagcggcgagcgaatgggagcgcctaaacctgaaaacggggtgtggga  
gagcaatacaagcgttgtctgtagcgaagcgggtgagtgccgaccctagatgctaaagtcagtagccgaaagcatcactagcttacgctcgtaccggag  
tagcatggggcacgtggaatcccgtgtgaatcagcaaggaccacttgaaggtaataactcctgggtgaccgataagcgaagtagtaccgtgagggaaagggtg  
aaaagaacccccagtggtgtagtgaatagaacgtgaaccgtgctgaactcccaagcagtgagggggaaagtgtatctcgtaccgctgctgtgaaagatga  
ggcggcactcatagcagtggtggtgtaagggaacggaaaccaccggagccgtagcgaagcagtgctcctataggcgattgtcactgcttatggaccgaa  
cctgggtgatctatccatgaccaggatgaagcttggatgaaactaagcagaggtccgaaccgactgatgtgaaagatcagcgatgagttgtggttaggggtgaa  
atgccactcgaaccagagctagctgttctccccgaaatgcgttagggcgagcaggttactggacatctaggggtaaagcactgttctgggtcggggctgcgc  
agcggtagcaaatcagggcaaacctgaaactagatagacccaaaaataacaggggtcaaggtcggccagtgagacgatgggggataagcctcctcgtcgtgag  
agggaaacagcccggatcaccagctaaaggcccctaaatgaccgctcagtgataaaggaggtgggggtcgaagacagccaggaggttgcctagaagcagcc  
accctttaaagagtgctgaatagctcactgatcagcggccttgcctgagatgaaaggggtaagcgtatcggaaagctgtgggatgcaaaatgcatcgtgta  
ggggagcgttccgcttagagggaacccgcaaaagcgggggtcagcaagcggaaagcagaatgctggcttgatgaaacattggtgagaatcca  
atgccccgaaaaccaaagggttctccgcaaggttctccacggagggtgagtgagcggcctaagatcagccgaaagcgtatgctgtaggacaacaggtcaata  
ttcctgactacccttgttggtagggagggagggaggttaggttagccgaaagatggttataaggtttaaagacacaaggtgacctgttctcagggttaaga  
agggttagagaaaatgcctcagccaggtccgagtacaaagcgtcagcgcctgaagtagagccccgtgactagccattgcttccacgaggtcatacc  
aggcgtacggcgtgaaatgtagtaaccatgccatactcccagaaaagctcgaacgacctcaacaaggggtacctgtaccgaaaccgacacaggtgggt  
aggtagagaatacctaggggcgcgagaacactctctaaaggaaactggcaaaatagccccgtaacttgggagaagggtgccccctcgaaaaagggggtc  
cagtgaccaggccccggcgtgtttaccaaaaaacagaggtctccgcaaaagctgtaagaccatgtagggggctgacgcctgcccagtgccgaaaggtcaagg  
aagttgtagaactgatgacagggaagccggcgaccgaagccccgtgaacggcgccgtaactataacggctcctaaggtagcgaatccttgcggtaagtt  
ccgaccgcagcaagggcgaacgatctggcactgtctcgagagagactcgtgaaatagacatgctgtgaaagatcgggactacctgcacctggacagaaa  
gaccctatgaagcttactgttccctgggattggcttggccttctcgcgacgttaggtggaagcgaagaggcccccttccggggggcccgagccatcag  
tgagataaccacttggaaagagctcggattctaaccttgtgtcagaccggcgcccaagggacagctcaggtagacagtttctatggggcgtaggcctcccaaaa  
ggtaacggagcgtgcaaaagtttctcgggcccagacggacattggtcctcagtgcaaaagcagaaggagcttactgcaagactaccgctcagcagag  
acgaaagtcggccttagatccgacggtgcccagtggaaggccgtcgtcaacggataaaagtactctagggataacaggtgatctccccaaagatccac  
atcagcggaaagtttgcacctcgtgctgcttccaccctggagctgtaggtgtttcaagggttgggtgttcccttactgtagagaggggacacctctgtgt  
tcagaagctcgtgagacagttcgtccatatacgggtggtggcgttagagcattgagaggaccttccctagtagagaggggggaaaggacacctctgtgt  
accagttatcgtgctacgtaaacgctgggtagccaagtgcggagaggataactcgtgaaagcatataagtagtaagccccacccaagatgagtgctctcctc  
cgacttccctagacctccgtagcagaccggagacagcaggggttctccaccataggggatggagcgacagaagcagtaaatagataaggttagcgg  
cgagacgagcgtttaaataagtgcaagtggaagtgagtgatgtagcagctgaggcatcctaaccgaacgaacgattgaaacttctcctacagcctgatca  
aatcagataggcacttccatctatcttcaacttcttgaataagatgaaaaaaccaaaaaaagcttgccttccatcttggatagatagagggga  
gggcagagggcttgggtgctcctccagtaagaattggggcttcaactactagcaatatttctctatgcttctcgttcatggttcgatattctggtcctagg

cgtagaggaacacacacatccatcccgaatttgggtggttaaacctactgcggtagcactgtaggggaggtcctgcgcaaaatagctcagatccagaatga  
taaaaaactaacctcttattgacttttactattttgaaatagcaaaaagatccaaatcgaaggctgcttattcaaacctcaatcacatcccctc  
tctcccacttcacactcggaaagcactgttctatagagagaaaggggcttccatcttcaaccgaaatgaaatggctgaggagagggttctttgggg  
ggtagccccgggaagagatccagtgagacggggtggcctgtagctcagaggattagagacgtggctacgaaccacgggtgctgggggtcgaatccctc  
cgcccacgcttccaaaggggagggccttacttcccctgagggtagaaaaccatgacgggatacggcagtaaaagtattgaaactgggtatgcttct  
ctttgtcgaagtgaatcgtagaacagaatgtgacatgagataaaatgcaatagaacaaggatagcgaacgggttacctactcctaagggtcaaagcagc  
ccttaattcaattcttattctacatfaaaatgaatcaaatctccccagtaggattcgaactacgaccagtcagtaacagccgaccgcttaccactgagctac  
tgaggaaacagggggttcgactcctagagttcaactcccgtcctcaacccatgaacaatagagtcgaagcttcttgaactcccgaatttctcgtatggc  
tccgttccatgcctcattcataggtgaagccagagtggtcttattcttcttctcacttccatcatttaatatccatccccttggcttattgacataagag  
atgtcattatagctatcttcttatatagaaagtcaagaattctcatgaaacatcgagaatgtgcatatagaaaactctaaagaaaagggagacc  
catgccatgatttcaaatcttctactttagtagtctaaattctcgtatgaggataaattcggctgctgctggctgactctattatgggttctgaccacattctccatgg  
gtccctcttagatcttcttccaactcttgattagggaaagagagatattcgcactcctgggtggttctattatggggcagctcatgattctcattc  
acctctgcatctattcttcttagctaaacgggtggaagatcccaatttggatattcagactcaaaaaacggatctgaatgtgactgaaatgcacgacttcaca  
ggtagcatttctcagatacctaaaaggtggaatagcatttctgaaccattcctataagagaaaggttccattcttggagaatgattctatacaactatagctat  
tgactaaagaagaaaactaataagaagcgaagacgggaatggtatgtagaagagaaatgattcttctggttcttctgctgaaaatattctatctcct  
agaccgctgagagaatgagaatttctgcttcaattctcgtactcgaattgaaaagttacggaggagatccatcttggcaatgaaaactacataaaaaact  
ggacaattctgaatcaggccaagcgtcttaatacatatgcaaaaaatcatttggcccaccattgattagaagatttaactgtatgaatcgtattggtgatac  
gaaagatgtagcatgctatggttcaatttctaaatgatacaatfaaacgggtgatacaattcataaaatggatagcaataaataaacgcaaaaattcttattt  
gatagaagaaaagttcttctatcaaaataaaagaatgtacccttctcaaaatccaaatggatcagataaaataaaccaaaatccagtagtagatgaataatgcaaa  
ttttgtgtgtagcagattagaataactcaaaataactgacataatttttttctctgatcagaaaaatacatgaaaaagaaaggagtagaaaaattttgattatg  
gttaagaagaaaagaaactgggttctgtgaattcaagattcagttcccaataagatacggagactgctcacttggaaatcacaaaaagatt  
ttcatcgaaaagaggtcggaaagcttgggaaacgtcaacgttctgcttatttggcaagaaaatagagtagtataagaataatcagtcagttgat  
attaggagcggtaattctcgtcgaatttttcttatttattatgtagtcttattgatttgcatttggatgagcctcgtttgaggaaatcaggaataatcc  
atttctatggaataatgaattaaggaagaaagatagctaccgcttacaagaaaagatctcatgatagtcaaatgggcccctcagccatcaatgcatggtg  
tctctgactgactgtactcgtatggtgaagatgttattgattggaaccatattaggctatttctacagaggatggaaaaaatcggcaaatgaaagctacttag  
gcaggagataggggaattcctaaagaaagaaaagaaataagaacacagatacaataaaaaaagaataaataagcgaatcgcctcccctacatatt  
taatttctctctatacaaaaactagcaagcactactcattgtaattccatcaatgacacccttgcgaaaaactcgttagttcgttaactccttataccaaggt  
aaagtcctatgataaaaaatctatataaccgcgattatagaccaactatattctttttttagttgatgaaaaaatacttttggacccttttcaaaaggaatt  
attaatccaatctgaaaaaaagatagcagatccataaaacatattgctatgaatagacaaaaatagctagacttacagaagaattgattatgataaatt  
catatgaatttatggaagaattagaacttcttggaaaaagttgattgaggagattgaccatttataaatggttaattccctattcattcaaaatgattctatag  
atccaaataacaaggtacaaagcagtaataagaagaggaaatgcatagatttccgggtcagggatagacaaaaggtttttatgcccacatgaagtactaa  
aggaccctatccttcttctgattaccatgaatttggatagatttggaaaaaaagaaactcactctcgtgttgataaaacgaaatctctattgactcctttagata  
tcttttcccataacgatattgaatacaacgaatcctctttagtactactgtaatttgaataagacacgcaataaccatcaaaagtaagtaaatatccgaaacat  
ataaacgcagtaactcgcagtaaaagagctatttccaaaaaggtgataataaccaactattactaaggatttcttggaccagaaagcaagcaagagg  
tgaataaccacaagagaaagggtaccataaaaaaacagttctgtaattggaatgtatttctaaaccaccataagaaccatattctgactttatctggtgaata  
tccaacaagaggtcattgaatgaataacagatccggatcccaagaataaaagcttccgaataagcatgagtgatcaaatggaataagcagcttgatagaac  
ctatactagagctaacatataacccaattgagacattgtaataaggttaagcttcttataatctctgagcaagagctaaagtgctcctaaagaaaggtta  
gtgtacttataaagaaatgaaactattatcaaaaggtagggatataaaaagggagaaagctcagctataagaaaaatcccgcagcaaccatagttgctcgtgt  
ataagagctgaaatgggggtggctcctcatgacatgggtaaccatagtaagagggaattgtgccgatttgcactgcaccaaggataataaaaaagca  
caaaaatgtaagcaaggagtaatctcattatggaatccagttattgactttaaacaatcccgaacttaaacctggtatccaaaaaaaacttagaatt  
cctaatacagaccataaaatcccctacagattagttacaaaagcttttgcagaagcactcgtcaattggcctgtaaaacaaaagcctatcaataataggaacac  
attcccacaagctcccaaaaaataaattgtatcaaatggaaactagtaaccaatcccacatggaggtattgaaaaaactatataaaaaaatacctcaaatatcc  
ctcatcgtgagacatataatcatcactataaataagaaccaggtcctacagtagtaattagttataacataatagaagtaagcgggtcgtgattaaatctaa  
ggaaaaatcattatgacgggtccaaagaccatagatattgatagatgaactccattatttggtaatagacaggtgaaactgagaataccatagctatacttaaaagtaa  
aacactaggaaaagcccatatgcgacgaagatttttggctgttggaaacaagaaaagtcacaaaccattgacataaactggaagtgaggagagggatt  
accatgcatattgatattgtccataagaaaagaaatgcaattttactgaaaaatctactcaattttctataaaatgaaaaaagttccgattcaccactaatt  
cttactatttctgaaggataaaaaataactagaattcttattttcaaaaatttctcattgaaacatcaaaaaataagaataggttttggtaaaagcaaaaagta  
atgaataaactcgttactgattacttaaaagagacttttataaaatacaaaaaagattgaaatcatttacttataatatttttattataaaatgaagcagctcct  
gtttcgtactcaaatgattggaattcaattctggaacttataaactattgattgaaatttcccctctttatctcccgtcttatatgggggatagggccctacatc  
tatatctgatatgagagatattgaaatataaattgatttaaatagaaaccttggatatacttattataaaacaaagcttaaaaaaataataatattgtaaaaa  
acttctgtctatccgattagacaaaatgaagtaaaaaagaaatcagaattcattatctttatgatactaaagtaaaaaagaaagatgattgatt  
gcggcaatagatgcttctacatacaactagaaaaagtaatttcttttgaatggcagttccaaaaaacgacttccgatgcaaaaaagcgtattcgtaaaaatctt  
ggaaagaaaagacttattttccatagtaaatcttattcttgaacaaatcaagatcatttctggcgtcagcagcatcaaaacaaaggggttttctcggcaacaaa  
caacaataatagggttttggataatgaattgacctatccccaaaaaattcaatttataatgaataatagggaataataggataatgaattactttat  
gtgcgaattctcgtacaatattctagaacaaacctctgatataaaaaaagggttttggatattcgtgacctaataattcttctatcaatgaactttcgtaat

agaatccgtataataaataaaaaaaggggattctattatgaaaagtagagtaftcctgcaataagactfacaacttctacctatcttatacctaaattaacaaaaaattagt  
tctatattgcaactgagaaaaaattgtccaactcttcaagttctattgggcaaaagcaagaattttttgtaaaaaattcgaacgatactaccaaacgaagctatttt  
aatgaagattctaattgtcctaattctatggaatctccaatctcgacgattcgcgagaaaaacttaataattctttaataaacctgttattcaacttagccgccatggtg  
aaattggtgacacgctgctcttaggaagcagtgctcaagcatctcggttcagtgccagtggtcggcagctcgaaaaaaatacaatagattataaataaaatgg  
atcaattcgaatttccaatttgaatgggaccttctctttagctatttgaacatataactaactatatttcttcaacaattcaattggtattacgattcat  
ttaataaccttattagttcgtgaactgggggattgctgattcgtcagaaaaaggaatgatagccactttttctgtataacagattcttagttctcgttggcctcttcg  
ggacatttccattaagtaattatagtgctcattgatctcttcatgggctctgtatattctcatatgattcctaagatacagaactctaaaaatgatttaagcacaata  
ctacgccgagactatttgaacgcaaggcttggccacgctgggcttftaactgaaatgcatcaatccacaactagtagctctacaactcagtggttaatgatgc  
atgtcagatgatgttactaagctatgctgactcttggctggatccttattaccggcctcttcaatgattgattcgaagaatttagattctttcgaaaaaaga  
aaaattgtttgcttaaacattttcttaatgagattgaaatattctatgcaaaaaagagtgctttaaagacaccttttcttatttccaatattacaataatcaatta  
gagcgttggattctggagttatctgctcattagcttagggftacccttfaaccataggtattcttggtagcagatgggctaatgagcgtggggatcctactgg  
aattgggacctaaagaaactgggacatttacttggaccatattgcaatttattacatagtagaacaatccaaattggaggggtacgaagtcagcattttagctt  
ccatagatttctataatttggatctgtattttggtatcaatctattaggaataggtttacatagttatggttcattacataccatctaaatgattacatacaataaacct  
taataaattggaataaaccttcttgggttatttgaacccctgaaacgctctcaaaagggttctcaaaaattcgaatagatctaattagactctttactttttc  
tgaatttttagtatttccataggaatagagcggactagtagaagaaaaaacctatttaggataataattggataacagagcctctaccctgtcaacggatag  
cgagagaacaaaactctgataaataaccgattccttactgtaaaaaagatacagattaaaagaaaggttctcggcggccggaactctcaaaaatttctgttgaac  
atgaaatgctgtatccatagaacatctgctgaacatagataaataaataaggagttatatacttcaatgacccattgcaaaagcattgaaacttaaacatggtaa  
aaaatttggactagtaattagccaaaaataacttaattccgcaacaaaccactatctgtgaagcgaagagcattgaaaaacttaaacatggttaa  
aaatttggcattgggatagaacccctccagttctcgaataaacaagcgcattctatcaaacagcgttccgtaagaaaaaagggttagcccaataaac  
catgggataaatttgaataatagcctcattgagttcaatgttggattggaaccaattctataataatgaaaccatgtgagagacggaggagtaggctattctttt  
gaaattgcttggccaagagaagttgagctgcatagattattgcatcgcctctatttactaacaaggggaaataagataatgagcattgaggttaacaatccata  
ttgatccgaatcaatccgtatgctccatcttaataggattccgctaaagcatacatgactgtaatgcttccccatgggtatctgtaaccacgtatgtaggggt  
ataatcggcaattgacagcataagcaataaggaagcgaataaataatgattttcaatgttgcagggtatgattgattaataatcttccaatctaatttggctt  
ggaaccgtataagcccatacctagaactccgattaagaaaaaattggaaccactgcagatatacaaaaataaactttgtagctgaatagagacgctcttccccccc  
acatggataaaagtaagtaaacggaataaatttaactccacatgataaaaaaagtaaaaggctcgcgaagaaaaataacttattgaccgctatacattgctag  
catcaggaaatagaataatcgggaattccgggtaaccggcaagctgctaaagtagctaaagtagctataaatctgtcaataaaatagatcctaataaagtcatt  
cgattccaatctcagtggaattgagacatctatcatttagaatctcttfaattggttaaaggatcctccaatggaatgatacagaatgataatgctatta  
gaaggaattctaatacaaatagacatagatataccactaacgattttgttccctatgaggtaaaaagaaataatgaccgcaaatatcggcaaacacaa  
gtattgtaaccaaggaagaactcatgataaagtgataaagacaagatagctttgaccagaaaagccgtgctcattattttagcacagcgtctctcggtaaag  
aggaaatcagacgattcaagtggaatttttgaacgtatcaataagatagagccatgctcggggttctcaggtcctaataaacggcggacgcttaaaaaatctgtt  
ggcaggcggattcgcactcttaacaccacacaatctcgggtcttggcgcggaagcaatttggcttgcattacatcccaaggtatcatttaatacatctgtt  
gacaagctcgtacacattgagtgatcctatacatgtatcaataattttacggaaatgtgacattggtatcaataatttcttcaacataaaaaatttctgatctgcaaa  
atgaaattagctataatacaaatgattttagacacaccagacgaagcaatggttatcaaaactcaacaaataatgcaataatatttcaatccgttggagaaagc  
atgaaaagagccaagagactgaaatttgggcttcaacaatcataattatagcaattgtatatacgaattcgaattgccaataaattgctatcttctcaataaatt  
attgcaatattcaaatgcaatcaatgaattgcaaaaattcaactaagtaaaaaaataactatggaataactactcaaaaatagatattcgaataaataaataatgta  
ttcatgttaatttcatcaataaataatagattcatgttaatttcatattattatattatgttcccttggttagaagattctatgcttaatttcaaaaaatgattgattg  
atagaggttatttctattacgatggatggaagaaagaatggataatcaatagctgctcagcagccgaagggtatacaaaaattgcaaaaatgctctcttfta  
attgctgctatcaaatagatcagaaatgttacgagatttagaattgaaatcagtaaatgtaaggtcaaggatattagagcttaaccatgttccgcttggatcaatcc  
atagatacaatcgaataaataagacactcaaaaaagtagatgctcaaacatcattaactccttataatctcattcaaatatggggacaagaattgaa  
ccgattgaaatagtaagaacaattacacaacaaaagagaaaagaggtatttggcagtagatgggtttactaaatcaaaattggttctttagtatttatt  
tagatttgaattcttataatttgaactattcattagatttcttatttccgagccatagtaattgacactattaaagaaactagaagaattatgaaatgagttcaaatggaa  
gataaaaaatcgggttctaaatgaatcccaatttgaacgttattttagagacctgttctactatttgggttgcattttagtccaagaatccataccatgactctg  
ggatagtagtcattagtaaaaaggaaatggtatatacaaacgagtgaaatgaaaccctcctcaatagtccaaaaattcttattcttagaccattctgagccatttacgaac  
attacggcaaatatgatcaagacattttagctccacataaataaagatttggccacagctacaagtaggaattcaataaataatagaataagatatacaacaa  
gaactaatcctagcgaaaaaagcaaaaaagttgggttggtaagtaataaccacctagacccttagtagaagaacaaatcccccaatagcacaagaatttcatg  
tattggcccaggtaaatccattatggataagaagaatataatgataaatttttcatgaaactgactaaaactaaaagattcaaggaagaaaaagggattaggaat  
ttttgtatattgatafaagttcttctatagttagaatacactacgaaaaactactctggtttaaactcagggaataattgcaataagcagtaggtattcttcttcta  
gttagtaaaagacttttgattctaaacaaaaaattctagtaatcagtaactgcttgaattccaagattttctcgtctatttactttgagttgaattcctaattgttgaatt  
gtgtaatctccattatggagattgtaaccgactcaaaagcaattgattgtaattcaattcatgacatcataagtagaaaattcatattctcagtcattgataaacgatt  
gtcggacagtagctcaacacaattaccacaaaatatacaaacctccgaaatcaactataatgaagcaattgttctttaaatacttcaaatctccaatccacaaga  
ggtagatctataggcatacgcgaacacatactcacaagcaatactatcaaatcaaaagtgattcggccccggaacgctccgatgaattgattttcataggg  
ggtagtgaaatgattatgtaaacgatttgggtgataaggttaattatgaaacttggaccaatgactctgctcgcgctattgttggaccataactcatgaaccagtt  
taccataggaacatattcgaatatctatgaaaaaggtatttcttcttcttggtagaggactttgttggaaaatttcttactgtattgtattatctattttatagtgaa  
aaaagttgggaagagttgtaataagagattgccagggaatagtaaaagaaatttccatccaaagatttaataactgatcattctcatctcgggtaaaagccat  
cttattgtatagaaatgaagagaataaataagctttagtaattgtaataaagatactattgctatttcaaaaattccaaccattttattcatttggaaaaatccaaaaag  
gatataatagggaatagacaattccaccgcctaagtagagaactgttcaaaaataagaggaaactaataaatttagtaagaacaagataaataaacatattt

afaccagaatattcggttgataacctgctactaattctctccgctctggtaaatcaaaagggaatctttcacattccgccaaaagaagaattagaaaaaccagaaa  
acctatgggctgacgccaaagattccatccaaaaaacafatttgactgtgctcaactatacaactgtacttgaactgttgataatcatagtcgacgataacatca  
cagttcccaccgctattccaaaaccgtacatgaaaccttagtttcacacggcctctatgatcagaaaaaggaaagtactgtttcattctgtattatctctggcgt  
agttagaattatctaaagataaacgattcaacgtcctaaatagacaaaggaaatctgtctgctagaataaaaaacgcttcggaattcatctcatctttataat  
aaaggtacttttcttctgacgaataacttaactctggaataaacactgttataacaafataaacgaaaaggtgggtattggtcatgagaattctgtatgaat  
atggataaacgacgaaaagaataaataagatcttttttgtattgcatccatctttgtcctattcttccccgaggggtatttaaaagaaaaaggaataaa  
gggttaattctgtctgatagccatttccctaacaagtgaatgggaacatacttggatccggaatccgaagaaagtactacttgcctcattccaccaattcaagtcctat  
tatgattcctttatgagaaaaatctaatgctttaattccctcattactaatcctttatgtactttagtgttctaaccctcactaacctttgatgattccctatgattaca  
actttctgtatcgggaatcccttattattgccgctcaagatgatgactaatcaaaaatctcaacctggggtaagaattacaccgcttatgttacttccattttt  
ttgtacataggaatgagatttttctttactacaataaagaagcgtttgttctactatagctatctgttacttactaacctgaaatagaaataagaaaaggag  
gataaataatcaatgaattcagagaaaaagatcctatttaacgaatcgacgtagagatattgctagtacaaaaagtaattgggattcataactaatagattgag  
cggcagctcgtagaccactgaaaaagaatatttattttagctatactctccataagaagaccaatagggaactactgaaatggcaatccataaaaaaacac  
caactaagatccgctaaaacaagcgatataccaaaggaaactaaaaactaataaaatgatatgactgctatagacggccaatgctaaataagggaat  
ccctcgggatggcaagatctctttaaagtagcttagtccatctgctatagcttgaagcagtcacccagggggccagcatattcaggaccaatcgttgtgat  
cgtatcggatattcttcttaaccacacaattacgagactctattgtgattccagtaagagggtcaaatgggtagaatccatagcctatagacttctttaa  
atccaagtcgaaaaagaattgatagcttctactgtaccctgtctattatcattcaacgatcaacttcccataatgatctatactacctaatactgcatgataca  
gccaattcatttttactagctgaggaagaattgcaaaataaaaaccgggtggacgaatttccatccaggggaaaagactatctctaccagataaaat  
cctaattcacttttggggctcactctgcaaaaactctgtttgcaaatcaaaaatgggtggaaggttttaccagaatcgtattcaaaatcattccattcggaa  
ttcttctttaaagcgtcggacttcaaaatcataaggcccccggaaattttctacagcctgttgaataatttggattgattccctcattccagctactaa  
atagcgtgctaataatcccccttctttgcccattgacttccaatgaattgattgtaagactcgtaaagatcaactttacgaagatccctgattccagaagcctgta  
acatggggcccgataagcccccaattacagcttctctccgtaataaaaaccaactccctcaactgttccaaaaatgggattctgttaataagttgttattca  
taactcctcgtaaaaataatcacagaatcaaacatttatgattccatcataagccagatcggcagcaactcctccgatgcgaaagtaattatgcatctcgc  
acctgtagcagctcaaatagatcatatatttctctctctaaaaataaaaaaaaggagctgcgaccgagatctgccataaaaggccaagccataacaag  
tgagaagctatacggctcaattcaacataatfacctaatatagctggctcttggggatttgaatattcccaagaattctgtgctattaccgttattgcttctgaaac  
atagtagctaaataatcccaactgtttacataaggtaagtattgtataatgcttccgcttccgctgtaaatagcctaataatgggtcacaatca  
ataacatctcaccatcagagatgaacgatcagcgaagaacacatgattgatgggtgctgagggccatattgactatcatgagatcttcttgaagcggtagac  
tcatctcttctcttaattcattatccatgaaaatgattatccatgaattcctcaaacgagcctcaaaaatgcaaaatcaagactactataagactactaataa  
aataagaaaaaaatcgaacgatgaattaccgctcccaatcaactgactgatttaatttataacgactctatttttcttccaataagccagcaaacgttg  
acgtttcccaaaagcttcggagaccttccgatgaaaaatcttttctgtaattccaatgtgaagcaagctccgatcttattgtgaaactgaacttgaattc  
aacagaacccagtttcttcttctttaaaccataaatcaaaaattttctactccttcttttcatgtattttctgatcagaaaaataaaaatattgcatgtattt  
gaagtattctaatctgtacacacaaaaatgcaattatctactactggaatttggattttttatc gatgcaaatggatttggatagaagggtacattctttttt  
agatagaagaaaatttctctatcaaaaataaagaatttgcgtattttattgtctatccaaattatggaattgatacaccgttaattgatattatgcaaaatgaa  
acatagcatatgcatccattctcggctcagaaattcaccgggatagagataggataagaataggctattaagtaactcaaatgaattgtggatactctgtatcct  
taacatactgaaacaactgccattatctgatcaaaccaatagcattcacaagttaaatcttcaatcaatgggtggccaataatgaatttttgcataatgattaaga  
cgcttggcctgattcgaattgtccagagttttatgattttcaltgcaaaatgatggatctcctccgtaacttccaaatcagagtagagaattgaaagacatgaa  
aattctcaattctacggcgtctagagatagatagaatatttcaggaacaagaaaaccagaagaatttctcttactaccattccgcgtctcacttatta  
gtttcttcttcttaatgcaatagctatggtgatagaatcatttcaagtaatgaaaccttctctatagaaaatggtcgaatcgtattccaccttttaggt  
atcgtgaaaagtatactgtgaagatcgtcattcagtcacattcagatccgtttttagtccatgatataccaatggatgattccaccctttagctaaaga  
aagaatagatcagaggttgataatagatgataagatcagatcgtcccaatgaaccaccaggagtcgcgaatctcctcttcccaatcaagattg  
gagaaaagatcagaaggaccatggaatgtggtcagaaccataatagatccaccgcaacgaccgaatfaattactctcagagaacttgaactgagccact  
actaagtagaaaagattgaaatcattggcatgggtctcttttcttcttagatgtttctatgacaaattctcagatgttctgatgaaattctgacttccatata  
gaaagagatagactataaatgacatctcttattgcaataagaccaaggatggatataaatgataggaaagtctaggaagtgaatagaatgaaatagagccact  
ctggcctfacctatgaaatgagcattggaacggagccactacgaagaattccgggagttacgaaagaaactcggactcatattgttcatgggttgagagcggga  
gttgaacttaggaggtcgaatccccctgttctcagtagctcagtgtagagcggctggttaactgactggctgtaggtcgaatcctacttggggagattg  
ttcattcttaatgtaagaataaagaattgaataaaggccttcttacccttaggagtagtaaccgttcgctatcctgtttctattgcatttatctatcgtatcacat  
tctgttctacgattccacttcgacaaaaggaaagacatacccaagttcaatagctttacgtccgctatccgatcatggtttctcctccctcaggggaaagtaagg  
ccctcccccttggaaagctgtggcgaggaggattcgaacccccgacaccgtggtctgtagccacgtgcttaatectctgagctacagggcccaccctctcc  
actggatctctccgggggtacccccaaaaggaaacctcctctcctcagccatttcttccggtaagaagatgggaaagcccccttctctataagaacagt  
cgttccgaggtgtaagtgaggagaggggatgtgatgattgaggtttgaaataagacgaccttgcatttggatttggatcttttctatttcaaaatagt  
tcaaaataagaggttgaagcttttattcattctggcctcagctatttgcgagacctccctacagatctgaccgagtagaattaccaccaaatcgggat  
ggattggtgtgtctctacgcttaggacaccagaatcgaaccatgaacgaggaaggcatgagagaatattggctagtaattgtgaagccccattctgac  
tggaaaggacacaaaaggcctctgctcctctctatctatcaagagatgaaaggcagagcttttttggtttttctcttctcaagagattgaacatgaag  
atagatggcaagtgcctgatgattgatcaggtcgttaggaacaagggtcaaatcgttcgtttaggatgcctcagctgcatacatcactgcacttccactgac  
acctattaaacggctcgtctcgcgctacattatcctatttccatgcttctgctcctaccccgtatgggtggagaaaccgctcgtctcggctgtgtaccggag  
gctctagggaagtcggagagagagcactcatttgggtgggttactacttatgctttcagcagttatcctcctccgacttggctaccagcgtttaccgtaggc  
acgataactgttacaccagaggtcgtccttcccgtcctctgactagggaaaggtcctcctcaatgcttaacgccacaccggataggaccgaactgtctcac

gacgttctgaaccagctcacgfaccgcaatgaggcgaacagcccaaccccttgaaccacctacagctccaggtggcgaagagccgacatcagggtgcaaaa  
ccttcccctcagatgtgactcttggggaagatcagcctgttatccctagagtaactttatccgttgagcagcggccctccactcggcaccgtcggatcactaaggc  
cgacttctctctgctcagcgggtgagctctcagcaagctccctctgctcttgcactcagggaccaatgtccgtctggcccaggaacaccttgcacgctccgt  
taccttttggaggcctacgccccatagaactgtctactgagactgtcccttggcccggggtctgacacaaggftagaatccgagctctccagagtgatctc  
actgatggctcggcccccccgaagggggcctcttcgcttccacctaagctcgcaggaagggcccaagccaatcccagggaacagtaaaagttcatag  
ggctcttctgtccaggtgaggtagctccgcatctcacagacatgtctattaccagctctctccgagacagtgcccagatcgttacgcttctgtcgggtcggg  
acttaccgacaaggaatttctgctaccttaggaccgttatagttacggccgcttaccggggtcggcggcggcttccctgtcatcagttcaccacttctga  
ccttccggcactggcagggcgtcagccccatagatgtcttactgacttggcagagactgtgttttggtaaacagtcggccgggctgtcactgcgacccccctt  
tgcgagggggcacccttctcccgaagtacgggctattttgccgagttccttagagagagttgtctcggcccctaggtattctctacctaccacctgtcgggtt  
tcgggtacaggtacccttgtgaggtcgtcagcttttctgggagatggcatgggttaccatctcagcggcctagcggctgtgagcctcgtggagaag  
caatggctagtcacggggctcacttccagcgtcagcggcttggactcggcctcggcctgagggcatttctctacccttctaccctgaaaaagcagggctac  
cttgtgctttaaactataaccatcttctggctaactagcctctccgtccctccgtaccaacaagggtgtagacaggaatattgacctgttccatcactacgcc  
ttcggcctgatcttaggcccactcaccctccgtggcgaaccttgggaggaaccttgggttctggggcattgattctcaccatgtttcttactcaagccg  
acattctcgttccgcttcgacccccgcttccgggttcttcccttaaggcggaaagcctccctaccgatctttagacatcccacagcttcggcagatcgtt  
agccccgttcatctcagcgaaggcgtcgtacagtgacttaccactttaaagggtggctgtcttaggcaaacctcctggctgttcttgcacccccacc  
tctttatcactgagcggctatttagggccttagctgggtatccgggtgttccctctcagcagatgaagcttaccctcactgtcactggccacctgacctg  
ttatfttgggtcctatctagatcagagtttgcctcatttgggtaccgtcgcgagcccgcaccgaacagctgttacccttagatgtccagtcactgtcgcct  
caacgatcttggggagaccagctagctctgggtcagtgatgacatccaccaggttccgggtcctaaagcagtgcaaatcgcctatgaagactcgttccgctcc  
gtttcctcaagcctcactgtcgtcagatagatcaccaggttccgggtcctaaagcagtgcaaatcgcctatgaagactcgttccgctccggctccgggtt  
cgttccctaaaccagcactgcctatgagtcggcggctcattctcaaccagcagcgggtcagagatcacttccctcccactgcttgggagctcagcaggtt  
acgttctatttactaccactgggggttcttccctcaccgttacttctcctatcgtcagcaccaggtattttagccttgaaggttggcttctgattcac  
acgggattccactgccccatgctactcgggtcagagcgtagctagtgatcttctggctactggactttagccatctagggtcggcactcaaccgttccctc  
gcagcacaacgctgtattgcttcccacaacccccgttccacgggttaggctgtcccattcgtcggcgtactacgggaatcgttttcttcttcttctgctta  
ctaagatgtttagtccgaggtgtctcttgcctgctcatggattcagcagcagtgcaaaagggtgacctatttgggaatcctccgatctatgctatttcaactccc  
cgaagcatttctcgttctcagccttctcgtctctgggtactaggtateaccgcaagccttctcttgaacctgccattaacgttaaggctatgccatcct  
aaggtgctactaaatggaagatctatcaacgtccatgaatgcgaatcatagatcgaactgccgaattggcaaaatcgggtctatcatagatccgctaagttcac  
gggctggagataagcggactgaaccgtgacatccgccacaggttaaccaccgctctcagcctccccgacgggttctaccatagagccaacgatagac  
aataactccccccgaacacagcttacaacttctcgtactgtctcctcaagagcaacttctcaaaatctcaaaacaaaaggtgctgagttggaatcccattcta  
aggattctgtgttccggggaatccagctacaggagaaccaggaacggggagctcctcccttcttccggcacttcttgaactaaactaaagatgctgtttaa  
gaacgagtgattgcccttctcagccttactgcccacccggagagcggagcgtaatgttccacttattgaacagggctctatgctcgtccgtgacctggac  
ggcgaagcgtccttgggggtatctcgtagtcttacgggggtgagataatggggtcgggtccatgatttcttcttcttccacattcgtcaaaagggtgaaagg  
agatagtgatcaagctatcgaaggcccaacttgcctcttcccagggatcccagatgagggaaagcctaggagagccgccactccaactatcgtccatgta  
cgatcatactagatctgaccaactgccatcctcctctactcttcttctgacagcccacttcttctcagtagagcttctcagtgatgttccagcttcttcccatt  
acttagaaaaagtgagccaccgggtcaggtaacaagatactaccattaccgctggacaattagacagccaaccgtaatcgaacgaccacattgcaagagcggga  
gcttaccacactgagctatatacccccgagccaagtgaggatgcatgaaagagtcagatgcttcttattcttcttccctggcgcagctggccatcctgactgaa  
ccagagacctcggcctgaagtaaatcctcggcctcagatccaaccaattgggagagaatcaatagactccttctgggagcgttccctcccgaacgcagc  
atacaactcctcgttactcgccttcaagtgcttcttcccccttcccccttaccatggcaagccttgggaataactccgatggcagaaaaaggaagcgt  
taagagacctcctggccaacctagacacttaagatccttttcaaacctgctctgtcccattcagatcaagagatagataaagccacatcccattgactg  
atcagggcgctcgtatgacttagggagtcgaagaccaagaagtggtctatttataccaagcattcctctatggctagatccaacctcctgtcctcggaaaag  
gaaaaagaatttccacttcttccaggaaggaggtatgggaagtcctattgattgcttctccagaccggcggaaaagcatgaaaaaagctcgaat  
gttacgatccctcgtcaccagaatgaaagggtgatctcgtatcttggctgtgaaagatcgtttaggtcctcatttcccattgaggacgaacctcaact  
gtgctcagagatagcttccatacactgataagggtatgattctcagaaagagagagccgtatgtgccccccccggaccggcggatcccacgagtgaa  
tagaaagttagatctacatgggactcactgaatcggccatctatcctctgaggagaaggttgggttcaaacctccgattcaaacagagaggtacgcatgc  
taatgtccttggatgatccatcttccgggtcagcgtgatgagcactgaactatcctatgtgctgagagccctcacagcccaggcacaacgacgaattatc  
aggggcgcgtctaccactgagctaatagcccgtcgcggcctcccttgggagcctgctacgcaaaaagcagaaaaactccatcccttcttcttctgacatc  
cccatccgcccacaccacaggggggggcatggggagcgtcaaaaagggtatcctatcactaactaatttcttccgacctaggataaataagctatgactt  
ggcttacttaccctaaacgaaagaagacttccatccaagtttagctcagacgtagctgcttcttcttgggctgaaagcagtgcaaaccaaaataaccaataag  
cataagcattagctcctgaaaaggaggtgatccagccgaccttccagtagcgtaccttcttactcactcagtcgaagcctagccttaggcatcccc  
ctccttaccgftaaaggtaatgacttcaaacatggccagctctatagtgtagcggcgggtgtgacaaggcccgggaacggattaccgccgtatggctgaccgg  
cgattactagcgttctcctcagcggcaggtgcagcctgcaalccgaactgaggacgggttgggaggtagctaccctcgcgagatcgcgaccttcttcc  
cgccattgtagcagctgtcgtcccaggccataagggtgatgacttggcctcactctcctctcctccggctaacaccggcggctgttcagggttccaaact  
catagtggaactaaacacaggggttgcgctgttgcgagacttaaccaacacttacggcacgagctgacgacagccatgaccacctgtgtccggttccc  
aggcaccctctcttcaagaggttccggtcgtcaagcctgtaaggttcttcttctcgtcgaattaaaccacatgctccaccctgtgtcgggccccgt  
caattcctttagtttcttcttgcgaacttcccagcgggatacttaacgcgttagctacagactgcacgggtcagtcgacagcacctagatccatcgtt  
tacggctagactactgggtcttcaatcccattgtcccctagcttctctcagtgctcagtgctggcccagcagagtgcttccgcttgggttcttccgatctc  
aatgacttaccgctccaccgaaattccctctgcccctaccgtactccagcttggtagttccaccgctgtccagggtgagcctgggatttgcagcggactt



gaaaagccacctacagacgctttacgcccaatcattccggataacgcttgcafcctctgtctaccggcgtgctggcacagagttagccgatgcttattcctcagat  
accgtcattgtttcttccgagaaaagaggtgacgaccgtgggcttccacctccacggcgtgctccgtagccttccgcaatggcaaaatcccact  
gctgctcccgtaggagctgtggcgtgctcagtcaccgtggctgacatcctcggaccagctactgatcgccttgtaagctattgctccaccaactag  
ctaatacagacgcgagcccccttggcggatttctctttgctctcagcctacggggtattgcaaccgtttccagttgtttccctcccaaggcagggttcta  
cgcgttactaccggtccactggaaacaccactcccgttcgacttgcatgtgtaagcatgccccaagcgttcacctgagccagatgaactctccatgaga  
ttcatagtgcttactatagcttcttattcgtagacaaagcggattcggaaatgtcttccctccaaggataactgtatccatgctcagattatagcctggagttc  
gccaccagcagtatagccaacctaccctatcacgtcaatcccacaagcctcttaccctccgttcgacgtggcgggggagtaagcaaaatagaaaaact  
acattgggtttaggataatcaggctcgaactgatgacttccaccacgtcaaggtgacactctaccgctgagttatatccctccccgtcccctcagaaaagaatt  
aacgaatcctaaggcaaaaggggcagaaaactcaaggccaccttccctgggcttcttccacactattatgtagatgcaaaataaggaaaaatggattcaattg  
tcaaccggctctatcgaaaataggattgactatgattcgagccatagcacatggtttcataaaatctgtacgattttcccgatcaaatcgagcaggtttccatgaaga  
agatcttctcagcatgttctattcgtactggtaggagaagaaccggactcggattcttaaaaaagagggaagcagaaccaagtcagatgataggctcgc  
ccttcttctgcccgaagatcttaccatttccgaaggaaactgggctacatttcttcaatttccattcaagatttctatctgtttccagccctttttgagaccctgaaa  
catgaaatggcaaaatctcttctttaggaacacatacaagaaaaggataatgtagccctccattaactacttcaatttcaattatgaattcatagtaatagaaatcc  
atgtctaccgagacagaatttgaactgtatctcttgcctaataggcaagattgacctctgtagaaagactgattcattcggatcagatagggaccaactac  
gttgacttccagaatccatgttccatattgaaaggggtgacctctgtgcttctcatggtacaatccttctctgctgagcccccttctcctggccacagagaa  
aaaatggaggactgggtccgacagttcatcaggaagaaaagaactcagagccggggtcgtactaataagaaatgactactaactaataatataagaaat  
agatattcagaatagaaacgaactaataatagataatgaaatgaaaagaactgtcttctgtacttccccgttctattgtaccggggcttattgcaatcgtat  
cggatcatatagatccctcaacacacataggtcatcgaagagatcggacgactcaccaaagcacgaaagccagttagaaaatggatcttattgaaaggt  
gcctaaccgatggataagctcacattaaaccgtcaatttggatccaattcgggattttctgggaaatggttcgggaaagaaatggaaataatagattcacaac  
agaggaaaagggttctattgatgcaaacgctgtacctagaggataggatagggaggaaggggaaaaatcgaatgaaataaataaagaataaagcaaaaaaa  
aaataagtcgaagatagaagagcccagattcacaatgaagaaatggaaactcgaagagatccttctgattctcaagaaatgaggggcaaggggattgataccga  
gaaagatttcttattataagacgtgattgatccgcataatgttggtaaaagaacaaatcttctcttataatgaaagtgtaaatgattcaaacatgaaacgtga  
ctcaattggtcttagttacttccggagcggagtggaagaaaggcggagactctgcaacgagaaaagatccctcgaagaaatgaaagagggactgatgag  
gtgaaaatctcatgtacggttctgtaggggacaggaagggtgacttactctgacttttccactatcaacccccaaaaaaccactctgcttactgaaagtcca  
gagtacgattaacctctggattgaaatcactgcttatactctggtattggccataatfacaagaacattctgtagtattagtaagaggaggaagggttaaggatttac  
ccggtgtgagatcgcattatcaggagccctagatgctgctgcagtaaaagatcgaacaaggcgttctagtgcgtttagattcttcaagactgtatcat  
ttgatgatccatgtgaatcgtagaacatgtgaagtgtatgctaaccacaataacgaaagttcgtaaagggactggagcaggtaccatgagacaaaagatctt  
ctttcaagagatcgttccggaactcttattatgccaaggtcaaatggaaattctcagggttttcccttacttctcctgctcaacaacaactgaaatccctga  
cttttcagaacaggtccgagtcacaatagcaatgattcgaagcactcttttccacttctcggaaacctaaggactttaggtatggaatggaataacagga  
ttccgatcctagcgggaaaaggagggaacggataactcaatttaagtgtgtaaacgaaatccatactcgtatcagatccctatagaattctgtggaagccgt  
attcgtgaaagttgatgtacgcttggaggggagatcttctatcttctgagatccaccctacaataggggtcaaaaagccaaaaaataagtgattcgttttagc  
cctataaaaagaaaacggattctgaacctttcacgctcatgtcagcgtgaggtactgcagaaaaagcaaaaaaataagtgattcgttttagc  
taacatggtggttaaccgtattatgaaagacggaaaaaataatfcttctatcagccgtgaaaaagattcaaaaaagacagaaaacaatccact  
attggtttacgtcaagcaatcgtagagtaactccaatagggatgaaaaacaagcgttaaaaaaaggatcagccggaaagttccgattgaaataggatcta  
aaaaggaagagcacttccattcgttggattatgaaagatccccaaaagcgtccgggctgaaataaggctttcaaaatgattccgaaatgtagatgctccaaag  
ggggtgggggtgcccatacgaaaaaaggagcactatagaatggcagaggcaaatagagcttgcacatttctgtaatccatgaacagaatctaggtatgtag  
acacatggatccatactcgtatcggaaaagaatcaatagaaggagaatcggacgatacttctcgaacaacaaaaaggaaaaagagaaaaacagaat  
catgatcaactaagccctcctggggcttcttgaagaataaagaaggaaatctttagaaatagcatgaaatagggtttagcttattcatgggattccgtaaatat  
ccattccaaaaatcgaacaatcgggactttcggagattggatgcaacttactatgacttggcatgtacagaatgaaaacttactctgattctacgagaatft  
ttatgaaagcgtttcatttcttctcagggaggttccaggaatgtatcctaattttggcctaattcttctctgatgatcattaaactctgatcaaaaagata  
gaacttcaacgaaatcttcaatttcttattatgttcaacttattgtattctctatccgtagatgacattgaaatgtacagaaatggctataacagagtttctgtattcgt  
ttaacagctacttagggggaatgtttttatgtggtgctaacgatttaataactatcttctgtagctccagaatgtttcagtttatgttccactattgtctggatataccaaga  
gagatctacggtctaatgaggctactatgaaatatttactatgggtgggcaagcttcttattctggttcatggttcttcttggctatattggttcatctgggggggagat  
cgagctcaagaaatgtgaacggtcttatcaatacacaatgtataactccccaggaatttcaattgcttataatccatcactgtaggacttgggttcaagcttcccc  
agccccctttcatcaatgactcctgacgtctcagaaggagtggttctgacaaaatcctactctatctctctgagggttgggttggcaaaactccatag  
atagcagaagagaatgctatccccactccgaccaagacagaacttttaccaaaagttattgtatcttttctcaaaataacaatagggtgaagcagggctcagga  
acaacgaatcttattatgataacagatccatttgcagctcgttattacgggtagttcctacaagaatcggactaatgactatacaatgctgaattatcagctgtag  
atgctacatagtggttctcatctcagagactacgagtgaatgaggatcctgtgacaaaaggatcacctaaagatgatcatctcatgctattgggaacgaat  
caaatcagatggttcttatttcaacttctgactgtcctcaggaaccaaggtcgaaggttgaagaaagtcagctcacaaccactgatgaagattcctcga  
aaagttaaggattagtagtcttcttcaaatcgttctgaaatcgttctgaaagaaatggattcgtcttatacagcagagaaaggtatcaaaagaaagacaagtctct  
tcttttactacttagagccgtcggagatgaaagtctcatgcacgggttgcagagaaagagcaggaatccttcttctgactctgactccccactccagctgt  
tcttttcttctgttacttcaaggtgctgcttctcagctcagccagcgaattctcgtatcttcttatttctcacaacgaatggacttcttcttggaaatcctagctat  
tcttagcatgattgggaaatccttctgcttactcaacaagcatgaaacgtatgcttgcattctgctcaggaatcggatgtaattattggaataattgtt  
ggagactcaaatgatgagatgcaagcatgataacttatgcttttctatctccatgaaatcaggaacttttgccttgcattgtattattggtctacgtaccggaactgat  
aacattcgagattatgcaggattatacagaagatccttttggctctctttagccctatgtctctatccctagaggccttctccactagcaggttcttccgaaa

actctatctattctgggtggatggcaagcaggcctatatttctgtttcaataggactcctfacgagcgttcttctactatctactatctaaaaatagcaagttaaatg  
actggacgaaaccaagaataaccctfatgtgcgaaattatagaagatccctttaaagcaacaattccatcgaattgagatgactgtatgtgtatgacatctac  
tataccaggaaatcaatgaacccattctgcaattgctcaggataccctcttttagctgctaggcttattcttagtcaagatccctctactaactggaataaagaat  
tagtagatctgtccgccaaaatgggaatggcgctaggtaatgaactataatcatggaatc gactgatcatcagattataagttcattccataccggaccagac  
cgtgcacattcttattatgagaaggggctcattcagcctatggaataggatactctgtttacatagaatcccacgctcttacccttatttaggattggaatagggt  
aatcagacctgctttgacatctatcctatccttatttgggtaccatagcactcttgggtcttattgaatc gagaatggattgtacatcttttgatttgatacatat  
aagggtctctacggataatgcaaatcgaagctattgtgtctgactcaggcctatagaccgatc gacgaaatactccaagactccaccttgcataatattccatata  
tcacattagatagatataatcatggaatc gattcactttcaagatcacattagatagatcatattcatggaatgattcactttcaagatgccttgatggtaaaa  
tggtagacacgcgagactcaaaatctcgtcctaaagagcgtggaggctc gactcctctcaaggcataatcggagaatgcgcatcattcaagcattccccgtaga  
agtattccggaaatcgcgcctggcctcctctatcttctgaggtccttaaccattcctcctgagaaaaggagacagtaaaagccaaaatagactaaatagcctg  
aacgatcctaaaaatccctcgaaggagataataataaagaacccaagcagacggatcctactgcaagggtgctttaaagaatccaaaagaggtgctcagaa  
gagatagatgatcccaaccttattgctctcgcgtaaaagccttttttacgcgacaggaaaaagtgactacgaattccctttttgttgcgaatccctgtttgatcctt  
gagccacgcccaatagtagcagatcaaggaaatc gataaacgatcccaataccgtaaaagagaactcccaagatccagggaagctatcaaaaagggtctega  
caaggggttttattcttctttagcaaaaagataagatcggatgagatcgaaccgaattgcaaaaggtaactactatgccagcccaatcatgcttccaa  
cttgatttgggtctctcgcgaaaatcgcgagttgcagagatgagaacctgaaaaagcaagatcccgaataagaaaacagaaccgaggaaaccacaagatg  
agactagtagagctcgtctttgctccttttactcaatgattcattcgaattcccacaaaatctatagctattcatagggcctcgttctaagtgc  
tacaagatctagtgactggaactcgtggtttagaccgaaatccttttagatggaactgcttttcaagtaaaaacccccagatataaagaatgaaaagggtc  
ttcgttctttctgtggaataagagccctcgtaccttaataagaaaggaaatggaattttcattaggatttgaccaaataggatcgtccagttcctatagaacatc  
actaaaataccgataaggctaaaggcaacgaaaaggatttccctgagatggtaaatgaaaacgattagccccatagagggttgggaataagatgagcaag  
gaaatacgtcttctgctaaagaggtatctaaactataatcattagatccttgtatcaatgtaactaggtatcataagtaaacggatccccggttgcctaatccttg  
ataaccaaggtcattcttctgctaaagagaatgatcactatgagtcagactcaatagaattggatcattccaaatagcagaataggattctgacccctcctaatct  
ctcttcaatcaggatccagagaggttctcatagctatcctcgaatatttccatcctcgaatatttctgattcattttctatgatgctttctatagaaaattggtta  
ttacgatgtacgatcctctgtaagcatccatggctgaatggttaaaagcgcacactcaatggtaatttgcgggttcaattctgctggatgcacgcgaacc  
ggaactgtccataagctattggaactggctctatccatggaatcctatccatccatacaacgaatggatggtatattcataccataacataagaacaataa  
gaactcgaattctatc gatactggaactcagacatagagggaaagtcgatttatggatggaatcaaacgcagattttacagaaaaagtcttctgttattggga  
aagaatcaataacttttaattgctgaatcgggattcactaaagacaaataaagcattgggtcgaactcttcttgggttaaggtagtagctgtgaatgccatc gact  
accggaaaggtagaagaatggccctattctagacatacaatgattacagacgtatgatcattaccctcaaccgggttattcttaccacttctagatagagaa  
aaaaactaaaggagaacttaataatcggcgaacattatacaaaacacctcccagcagacacgaagggaaccatagataggcaagtgaatccaatcca  
cgaataattgatccatgacggcaccgttgggttaaaggtcgtaatccagaggaaatcattaccgcaaggcatagagggggaggtcataagcgcctataaccgta  
aatc gatttgcaggaatcaaaagacatactggtagaatcgtaacatagaatac gaccctaatcgaatcgtacattgtctcatacactatggggatgggtga  
gaaggatattttacatccagaggggctataattggagatactattgttctgtacaaaagttcctatataatgggaaatgcctcatttggatgctggttgaac  
tattgattacgtaattggaagtaaccaatagggttacgacgaacatgaaatc gactcatttactcctacgggatagacctcaacagaaaactgt  
tgagtaacggcagcaagtgtgattgagttcctcatagaaaatttactctagagatattgtaaatggagaagcaaaaattgttgaagcagcagacagaa  
ccggaagcgccttgtttcaagagagggagcgggttattcacatttattgatggtcagagcgaattgaaagctaaagcagtgtaattaaagacccccggg  
gaaaataggatgtctctacgttaccataatagtagaagatc gacgtaattctatagatcattcgaatgtacatgaagaacataagccagatgacgga  
acgggagacctaggatgtagaagatcaatagcagcattcggcagatttggattccttctatataccactcatgtggtacttcatcagattcataaagatc  
catctgtctagatcgtcatatacttagaaagccgtatgctttggaagaagctgtacgatttgggaagggtttttgagagaaaagaatcacttcaaccg  
atatgcccttaggcagccatacaatagaaatcacacgtggaaggggtggcaattagctagagcagcaggtgctgtagc gaaactgattgcaaaaagaa  
ggtaaatcggcactttaagattaccatctggggaggtccgtttgtatccaaaactgcttagcaacagtcggacaagtggtaatttgggtgaaacaaaaag  
ttggtagagccgggtcctaaagtgttggctaggtaaacgccccgtagtaagaggggtgattgaaccctgtgaccacccccatggggcgggtgaagggaag  
ccccattgtagaaaaaacccacaaccccttgggttatctcgccttggaaagaaactaggaaaaagaaaaatagtgatagtttattctcgtcgcctga  
agtaaatcgtactaggaatggaatgcaatttggaaattgcaataatgggtatgggcgaacgacgggaattgaaccggcgtatgggtgattcacaatccct  
gccttgatccacttggctacatccgcccttaccagctaaaggatttctcttttccattcattattctatttattctgacctccatactc gacgagatattggacat  
cgaatgccacttcttaaatggaaaaaaggagtaatcagctgtgacacgaaaaaaacgaatcctttttagctcatcatttattggcaaaaatagaaaaggtcaata  
tgaaggaggagaagaacaatagtaacgtggtccgggcatctagcattctaccgcaatggtggccatacaatcgcgattcataatggaaggaaacataacc  
tattacataacaatcctatgtagtgcgcaattgggggaattcgtaccaactcggcattcagagttatgaaagtgaagaaaggatactaatctcgtcgttaa  
ctgaattcagaatagaaagattcaaaaataaaaaaaagaaata

>O.glaberrima\_IRG103486\_cp

cccaatcttctcctcagcaagatattgggtatttctagctttccttctcaaaaattgctatattgtagcaaaaagccttatccattaagagatggaactcaagagcag  
ctaggctagaggggaattgtgagcattcgttcgtcattacttccatacaagattagcagcgttgatgatacagcccaagtatttaaacgcgacctgtgctatca  
actacagattggtgaaattgaatccgttttagattgaaagccatagactaatactaaagcagtgaaacaaatccctactacagcccaagcagccaagaagaagtg  
taaagaacgagaggtttaaactagcatattggaagattaatcggcaaaaataacctagagcggccacaatattataagctcttctcttctgacaaaatctgtaacct  
cattagcagattcgtttcagtggtttccctgatcaactagaggttaccaaaggaacctgcatagcactgaatagggaaccggcgaatacaccagctacacctaac  
atgtgaaatggatgcataaggatgttatgctctgcctggaatacaatcataaaggtgaaagtaccagatattcctaaaggcataccatcagagaaactccttgaccaa  
tagggtaaatcaagaaaacagcagtagcagctgcaacaggagctgaatattgcaacagcaatccaaggacgcataccagacggaaactcagttccactcacga  
cccataaacaagctacccaagtaagaagttagaacaattagctcataaggaccgcaattgataaccactcatcaacagatgcagcttccaaaattgggtaaaa

gtgcaatccgatc gccgcagaagtaggaataatggcaccagagataatgtttccgtaagtaaaagaaccagaacaggctcacgaataccatcaatctactg  
gaggggcagc gatgaaggcgataataatacagaaggtgcgggtaaaaggttagggatcaaaaaaccgaaccatccgatgtaagacggtttccggtgctag  
ttatccagttgcagaagc gacccacaggctgtacttccgcctctctaaatgcaatgcaatggaatgctgtttatcaaatgcaaggactcccaagcacag  
tattaactagaaagataagaagcgtgttttaacgataatatactatataccaatgcaaccaagccagccccgacagttgtatatacaacaaaatfta  
ccaaaccaaaaatfttgaatgaagtgagtaaaaaatcaaaactcagattgctcttctagttccataggggtgcccgggactgaaaccggaactagtcggat  
ggagtagataatattcctgttacaaatagagaaaaaacctctcccaaatcgtgcttgcattttcattgcacagactttccctatgtagaaataggctatttctatccg  
aagaggaaagtactaatttttagtagtaagttgattcacttactattatagtagacagagaacattcagaatggaaactgtgaaagtttaccctgatcattatcaat  
catttctagtttattagtttgtttaatgattaatfaagaggattcaccagatcattgatagcggagaatccaaataccaaatcactgctactgtcgatccacggaaagaa  
aagtaagttgtttggcgaacatcaaaagaaaaactgctcttctccgtaaaaaatfttctaaaaataccgaaccaaccattgcataaaaagctcgtaccgtgctttat  
gtttacgagctaaagtctagcgcataaagtcgaagtataatactttagtcgatacaaaagcttctttttgaaagaccctgtgataatgaaaaagatttctacataccg  
accaaaccgatcaagaatcccaatccgataaatcggcctcaatggttactaataaggatgccccgatccagtaaaaaatgggcttttgcataaagatccaatgaga  
ggagtaaacaggcctttggtatcgaatttttcttctgagatctattagaatgaattctccagcattgattccttactaacaagaattttgtactgtaaaagtac  
cccagaaaaatcgaagcaagagtttctaatggttttagatggtatcctttgctgggtgagtcacaaaagagaaaatattgccacaaaggacaaggttaacattccatt  
tcttctcaaaaagagagttcctttgatgcaagaattgcttctctgatacgaacataatgataaggggatccatacgaaccataggtttccgaaaaaaagcag  
ggtacattaacccaaatgtccatctctagaaaagatgattcgtccagaaaggtccggagaaggttaatcgaagcaagaagattgtttacgaagaacaaca  
agaaaaatcattctgatacataaggttataggaaccgaaatagcttctttttcaaaaataaaatggattcattgaagtaataaaactattccaatcga  
gtagtagttgagaaagatcgaataaatgcaaggatggaacatctggatccggattgaaggagttgaagcaagatccaaatggataggtatgggtatttctat  
atgtgctagataatgtaagtcacaaaatfttcttcaaaaaggaatattgaatgaatagatcgtaaattctgaaactttggatttcttttccggacaagactgttc  
tcgtagcgaagaatgggatttctcaaacgacgcacacccctcagatagaattctgagaataaaactcagaataaaaaaattgttgaatccaaatcagatctgggta  
ggatgattaaccaaatftaatccaaaatftcgtgatacattcgaatcaaacgtttccacaagtagtgaactaaattctgttattagaaccaataatftcgaacagttc  
ggaaccatttaaccataatcatgggcaaacacataaatgtactcctgaaagagtagtgggtagacgaaatattgtctaggaaatftaagttttctgaataaccctcga  
atftttccattgtatttctactgtaacagagagagaaatatttctcggttatcaaatggtgatac atagtaacatggtcagaacagggtgtgtcatttttaatacaa  
accctggggaagaaaaggagctaatccacggatcttttccgctcttctatccaaatgtttatgtttgttctaatcaaaaagagaacaaatcctttattttgcagg  
ccaattgctctttgactttgggatacagctctttatcaataactgcttctttacatcattccataacatcctttcaatccaaaatcaagaataataggatttctaaa  
aaaaaaaaaagaaaaatcaaaagtctactcataggaaccagcttttccctacatcaggcactaactatttttaacgtctaatgagatcaggggagttctccaattaa  
gaagttfaagctcgttctttttgtttaccagaatggagccaggctctatccattatcattagaccagaaaatcagaatftttttattccattcaaaaatccaaaataa  
gaaattgattttatfacacatgctatttttccattcattaccctggagatcagtcgctgtctatagactctaccaagagctggacgaaatftttgtctatccaatgtg  
taaaagatcagatgcacttaaaagccgagtactctaccattgagttagcaaccagataaactaggatcttagatagatcgaatccaaaaatcaatggaattac  
accgcacaccctgtcaaaatctaaatagcaagacattaaagaagattttatcaccattgaaaacactcagataccaaaaggaaacgggctgtgttaaaatftcact  
aaggttaaaagtggccaatcagatcgtaaaatgtcatttttttagcttttttttaataataaataaataatctttagatgagatcaacaagagggacaaccctac  
catttgacaaaagttaggcaaaaaactaataggaggtgagataaagagacttatccatctacaaatctagatgttcaatggacctttgtcaatggaatfacaatg  
gtaagaaaaaatttagatagaaaaactcaaaaaataaaggcttatgttgattggcacgacataatccagtaaaaaataggattaagaaaggcaaatattttct  
aaatagttgacaacaagggatactagtgagcctctcctagttttttattcatttagtttctcaatfaactcaaaagtttcttttttaaaagaaatccgcttcttaaaata  
tcgaaactgttctgtaggttgagcactttttcaaggaaatagagaatgctggaacattfaacaagtttgatttcttatcggatcaaaaaactcttttcaagat  
ctcttctctctcctgagatcgaacatcaatgcaacgattcagatagacagcttattgggatagatgataaacaagcccccttagaacgtatagagggtttct  
cctcatacggctcgaagaatgactgcaatatttccgtacagaaaaaacaatttcaattatactatgactcaagttgactaattttgattgacagactgaaagaaaa  
aaatccttgaatfttttgagctgctctaaacttctttgctctatctcgaacaaatcacttttattcctattccggtccaattctattgtgagacagttgaaaatcgtg  
ttactgttcgggaatccttattcttattgttgaatccttgggtttaaacttctcgggaattcttattctttttcttcaaaaagagtagcaacataccctttttctattt  
ccttcgataaagcatttccctctctatagaatcgaatagagcattgattctgatagacttttaataaaaagagtttccatattccaaaaatgacttctcttatttt  
aaccttttgattctatattttcgtattctatattaagggtagaatgacaaggtggcctaatttattagtttactaaccttagattcttcccttgataaaaaataaattctg  
tctctcagctccatcgtgactatttacttagcttacttacaacaacccagcgaaaatcgggtcgggacgaatagaacagactatgctgagccaagagcatttct  
attactatggaaaatggtgtagcaaaaatccaaatcgaatcgtctcctcaagtcgacgttcttaccacatcgttttaaacgaaagtttaacataacactcctca  
atftcattgcaaaagtgtataggaaatgatccaatattggatggaatcagaaatgcaatgcttctttttgtataactaattcaaaactgctttgctatctatggagaat  
gaataaaagaaatgaattatcgggaaagactcgaagagccaatftatfaaacctatttctatcatgaatgaaatagatgcaaaaaagggaataaaca  
agttgcttaagacttattatgaatttccatcctcaacagaggactcagatgataatcaatcctgaaatgataagagaagaattgacttctccaacaata  
aactataacactcccgttfaatfaatfaataatataattagattagcaatcatttttccataaccattttccgtaacaaaactaactaactaactgtaaaactattgcaat  
gaaaagaaagttttggtagttatagaattatcgtatttctcagctcgaataccaaaagaaagaaaaaaatgaagtaaaaaaacgacttctgtaaaagtaaaatfaa  
ggctttgcttttacttatttttcttttaccataaagaaagcaactccaaatcaaaatgaatcattctatctaacgagcagttcttattctttaccgggatgattct  
ggatattfaaaaaatcgcggatcagatcgtttcgttaacaaaagaaagaaaaagaaaggaaccttttactaataaaaactataaaaaaattatctctatca  
taaactatctctaccataaaggaaatggtcgtgtttttatacaatgtctcagcgaagttfaaaatftttcatgaaaaaagattttcaattgactggactgacactggat  
tatgtttctgagacgaaaatgaacgattaggactcagcgaatcaagagttfataagagaaaaaattcttfaataaactftatgctcgtgcagaatacaatac  
gatttcatcttctgtttcatagaaaaatcgtggacggaagattcgaacctccagtaacgggacaaaacccgctgcttaccacttggccacgccccattcgg  
gtttatgacgactaataaacgattatttttatttcttattcgtcaatcctactcaatfataaaaaatgggggtatttcttctgttagattctagacatcgaataat  
agaatccaaaaatgcaatgactcattacatggaattctattagattatataagagtcgaatttcttccactctatttgagagtcgaatacaaggaggtattttgtgtt  
gggaaagtcggaagaaaaaggattttgaatcctcttttcttttcccttagaaaaataactcaatcaaaatccaaatctactctacaagaaacgctgtttatg  
cctaatactagtttaacctgtattgttttaattctgtattatccgactagtttttctcgcacaaatgccgaagcttatgcgattttcaaccaatcgtgattttatgc

ctgtcatacctgtactctttttctattagcctttgtttggcaagctgctgtaagtttfcgatgaaatcttactactctgtctgccaatfgaatcatgtattcattctaaaaaa  
ttcgaaaaatggataagagccgagaagcttataatgaacctcgtattcfaaaatcaaatctctacattgaatgtatagctgcagcaataaattggatcagccttc  
tactccctgcatctacgttgagcaggtatcttagtaaccgcacaatacctaacctatttattgataaggtgcttattataatcaattctgcaatttttcfaaaatg  
atftttgcaatfttaggtgtcaaaataaacaaccatcctagtgattgtgtgtaagaaaaacggtaatctattccttaaaaaaaatctggagattatgtaatg  
cttactctcaaacctttttgtatatacagtagtattctttgttccctttatctttggattcttactaatgatccaggacgtaactctggcgtgacgagtaaaatcaa  
aatttttctacaatggattgttcatacattatctacgagaaaatccggggctcagaatcctccaattcgaagtccaacgatccgagggggcggaaaga  
gagggattcgaacctcgttacaaaaaattgtacaacggattagcaatccgcccttagtccactcagccatctccccgtccaatcgaaggttccgtgat  
atgacagaggcaagaataacgattgcaaaaaatcttccctttttcttcaaaagtcaaaaaatataattgccaatccatttagtattctttttctaatgttaataaa  
aaaaagaaataatcttctttttcttaattcaaaatggatattgctaaaaagacaatcagatagattttcttccagcagcatttccatagactgttataata  
aaacaagcaggtatagaaaaaactcttttttattattatcaacaagaaggggcttatacaaacaccaccctataaaatggaaagaaagataaagta  
agtggacctgactcctggaatgagcctctatccgctattctgatataaaatcgtatgtagaattgtataagtgattttttgtattccttagacttagaccacgca  
aggcaagaatftctgctatttactatttctattctgttactagatgtcttataggaataagaagaatcgaacccttccgctacacataaaaaatgattcgaagt  
caatftttcttcaatattcttactttttcagaactctattttgttctataccatgcaatagagagcagtgaggaaaagagaggttactttttctttccftaaaaaa  
taggctttctggaaataggaatcatggaataatcctgaattcaatgtttattctatagataaagaaactaattgaatcaatcatgatttaccacgacctggctg  
tgaccatagataaaaaatgcaaaatctatctcagaccattgaaaaagcattgaaagcaaaaaatgctccacagataatctatctgatgcttggaggtgat  
ataaggtgctcggaaatggtgaaatgaaatgagagatcactatgactatagccctggttagaggtactaaagaagaaatgatttattgataatgacgact  
ggttacgaaggaccgtttgtttgttaggtgctcgaatcttcaaccgacagcatttccaccctgccaatagtttagcacactttgttctactatggggccgga  
agcacaaggggattttactcgttgggtgcaataggtgctcgtggactttgttctccatgggggcttttgactaatagggttcatgttacgcaattgaaactgtc  
ggtctgtcaattggccttataatgcaattcattctcggccaactcgtgtttttgttccgtattcctgatttaccactggggcaatccggttggcttctgcccga  
gttttggcgtagcagcatattcattcatcctcttctccaagatttcaataatggacgtgaaaccattcattatgatgggagtgccggagtatttagcgcgctc  
gctatgcttattcatggggcaacctgtgaaaactctattgaggacggtgatggtgcaaatccctccgctttaaaccacacaaactgaagaacttattca  
atggtcaccgtaatcgttttggcccaatcttgggtgttctttccaataaacgttgggttactttttatgctattgtaccggcaccggttatggatgagtgctat  
tggcgtagctggcctggctgtgaacctacgtgctctatgactcgtttcccaaggaaatccgtgcagcggaaagatcctgaatttgagacttctacacaaaaatattctt  
taaacgagggatctgtgctggtgagcagctcagatcagcctcatgaaatcttattccctgaggaggttctaccacgtggaaacgctcttfaatggaactttgt  
tttagctgctcgtgaccaagaaccaccggtttgttggggccggggaatgccagacttatcaattgtcgggtaactactggagctcacgtagccatgacgg  
attaatcgtattctggccggagcaatgaacctattgaaatggccattctgaccagaaaaaccatgatgaacaagggttatttactccgacttagctactct  
agggtggggagtagggccgggggagaagtctagatcttccgactttgtatctggagtactcattcaatctcccgactcttaggctcgtggtgcaattatca  
cgcgctctgggaccggagactctgaaagaatctttccattcttgggtatgtgtgaaagatagaataaaatgactacaatfttgggtattcacctaattgttaggta  
taggtctttcttagtactcaagcctttatttggcgggtatataatgatactgggctcctgggggagagatgaaagaaaatfaccattgaccttagccccg  
gtgtatattgttattactaaaaatcccccttttggggagaggggtgattgttaggtgagattgaaagataaattggggacatgatggttgggttcttattgtg  
tatttggcggaaatfgcatatcttaacaaacccttcgatgggctcggcgtgattgtatgctggagaagcttactgtctatagtttagcgccttattctgctttg  
gtttatcgttgttttctgtggttcaataatcacgcttaccgagtgatttttaggacctactggccagaagcttcaagctcaagcatttttctagtagaga  
tcagcgtctggagcattatggtgatctgccaagaccacaggttaggtaaatctaatgcttcccaacgggagaggtattttggaggggaaactatgcg  
ttttggacctctgctccatggttagaaccttaagggcccaacggttggactgagtaggtgaaaaagacatacaaccttggcaagaacgacttccgc  
agaatatatgacctatgctctttagctcttfaaattctgtgggtggcgtagctaccgagatcaatcgacttaattatgttctctagaagttggttagcacttccatt  
ttgtctagattctctttttgtggccattgtggcatgaggaagagcccggctgctgcagcaggttgaaggggaatcgtatgattggagcctgttctt  
acatgacctcttaactaagatttctattatactgttctactgtttttctgtctgctcgttattctatctagccgagccattccttctatgaaagaaagataa  
ggggacagaacaaaaaaacaataaaagaacaaactgattcaatcgaagaaagagagagaaagtaaaagagagagagggatcgaacctcgtat  
agttctagaactataccggtttcaagaccggagctatcaaccactcagccatctctccacagcctaactcttattttactacaatagaacatagccatacgaat  
gactcactaacctctagaacatctcaatacaaatccctttcagatatttctgatactgtatccatgatacaggatccgctatattccgcttgtgaaataaagcataaa  
accctcaaccctatccaataaaaaaaggtggtgagtaataagttttaaagagaagaatcaatgattcatgattaaaccctcactcttcttattttatfacaatt  
tgattagtgagggatcaataataatgtagtcaactttattgtagtgaacttggaggattagaaatgactattgcttccaatgactgttttgcattattgtgact  
cctcagcttagtcaatgtagtacccttatttctctctgatggttgcacaacaataaaaaactgtattttccggtacatcattatggattggactggtcttctggt  
agctattcaaatctctctatttctaaatgtttagtatttagtaccgatacaaaaaaaaaaggccgttattcggattgtgagacgcaataaatgcaatttgcgc  
cccgaattgattgacagacaataaataaaaaagaaaactcaaatagaaatgaaacggtcgaccagacatagacggtcgaccagcggatataacctata  
aaatataggacgtagcagcgtatgcaatgtaaaacatctccttccaaggagaagatacgggtcgtattcccgcgctcgcacgttaatttagtaaggtactat  
gataaaaaatttagtctacttttataaagtaataggtgttagtcttagtaccgtacccttactatcttagcccccttgcaccaccactaaaaaaagagcactacagc  
gcgggaatcgaactcggcaacaggttccctaaaccgggattcaccgaaacaaacaccagcaaacgctttaaagggaaggagatagactgtcctttctt  
tctttttttttcttctgcaagtaggggcttggaggtccttctgtgtgcaagttacttgcacctgctcaatttggccttataggctcgggaactaatgaata  
aaaagggttgataccgccaaccaccagccctctaccatactagacaataagaatagcttctttatacagactgtaagtgcggagacgggaatcgaacctg  
gacctcaaggttatgacctgtgagctaccaactgctctactccgctcgtggagcgtggaacccggtggacgaaaaaggtgaaataacacagcccttacca  
tgtctagacaataagaatgattttatacagaatgagcgggtagcgggaatcgaacctcgttagcttggaaaggctaggggttatagctgacgttgggtgatt  
attattaacgtctcaatfcaaacgaacatgaaatttgaattcctcggctctttatgggtattctaccacttaacatcaatgtagctttttgtctgaaatggaacaa  
ggctctctgcttctagatgatcccaagagtaggagatagaatfccaatctatctaatcaattctcgttcccaatfctttaaagagatccctgagaaaaa  
attgggttccaccgagctgaacaataatgctgatggttctagtaaaacaaactaccgttttttagctatttggcttccattccttttaacaaaagaagatttagtacc

atfggaaataaattttttgtatcttcatcatagatccttactcataatfttaaaaatfgaatccttaafccaatgcaaaatfatgcttcgagactctgtactcataatccaat  
cctattgtttttggatgcaattcaatfatgctttgggtacaatcgcgaaaatgcataatcttctcaatagctattgagagaaaaggagtaaatccttctaagaact  
aaagtttcatcggaaataaaaaaaccttaaggacgccttaagtataatcttcaaatcagttataatagaacgaatcacactttaccactaaactataccgctacat  
gtaaatctgataccaacgctaccctttgcaagggtgaccatcgaaaaatgctaatccctctagttaatgaaacagagaaggcttctcacagttagcagttggt  
acttcgatcgcggccttcttacttctttttgtcagaatgaacaaagaatftggggaagaaaacatctccccacatcatgaaatctggccatagagaaa  
gagtgagatgtttttttatfatcatagactttccctatgctttgagagaacaataaataacttaaaagaaaaagccacataggagccgaaggatttacttgatgaaa  
gaagattctgaatgtctctgcttagtcgattctctccgttaacttttctcttcttccactcaatctagtftattagattctgtttaaaagaatcaaaagaatgaaatg  
aactaagaacacacaaaaaagacatataggcccagaccattcaaaaatgcttcccaataatcatattgggtatctgtccctcttcttctattaggatggggca  
gtttggattttccatataccatcgaaccttaagggtccagaacctcctttttgctagttttcggaacggaaaacctgaaccaggagcagatataaattcta  
ctgcccgcctttacaagaaaatggtgataaaactccactacagttgttcaaaatgcaccaatcagaatcccttgagaatattcaagtacctatttcaagatattct  
aagagaagagggtacgtcgtgaaaatcgttcaacaaatccgcttaagaaaaatgcaaaatgtaaacgaaggtttccaagggtgctgttaaaaatggttcaa  
cctctcaccacaaacagacaagaatgatactgaaaataatccagccatagggtatataaggggcgaatctgttataccacccaattagaggaaataa  
aacataatggagaagtttcatgataagatcagcaatagaagaaaaagtcctaattttcagaccgttctgagcatgtgaaaagcaatagcctaagataaaa  
aacctatactttgcaagtgataagagagaatgaagattttcctattttctgattttccttaagatttttgaacctgacctgaatagacttataatctcgaatata  
cagataatgtacattatggagtagacctataatgggaaatgaagtggtcaattttggaatgaataagacccttttaactcagtgtagaataatgcatggtaa  
ggcataagtcacgggtcaaatccgataaagggttttacttagtgtagaataagccgcgtaagacgtgagtcagtggtcaaatccgatacagctatttcta  
ctaaatcattcactttctttttgaaaatttcttttttattgaattgataacttagtgcgagatgcatgcattttagtttaaacactaagcgaagcaggggggtgaa  
atcccaaaaagaatggactcttttctattagatcaatcaaatcactaccgctactgaactaataagaatccctttattaatctattcttattcattcctttataaa  
gaatttcccaaaaagtaggggatgaccgtgaatttaacctaaccataactaaataaaatcctcaaaaagcataatggaaaagtagaaggaactcctgtttggat  
ctagtatactctcagatataatgacaattccaaaaactgctcactatctattatagataatgagagcgtgtgtataaccgctctctctctctctctctctct  
ctagtgttcagacatctcttccaaggaggcagcggggttcgacttccctgggggtaggagattatgaaaaggaggttaactatagattatcaaaaacctta  
gaataaattcttctgggtcgtatcccagcgttaatggggcagcactgtaaaatcgttgaacaatgctctcgttcaaatccagctcggcccaaaaatctag  
ggctcgtgaatagatgtaaatccattttttctccataaaaaagaatattgatccatagaataaaaagaataaaggataaaaaagaaaagggaatattctttaa  
tctatctcttctcactctctcttacaacacaaaagacctttctattggttattgaaggtggattatctatttttagcgataataaatcggacatactagttatgcaatc  
tcaataacccccatacagacgggggtatgtagtatgattcgtctattcttagagtaggacagcgaatattcttattcttaggttccatttaagaataagatgcca  
tacccccgcgggattgtagtcaattggtcagagcaccgccctgtcaaggcgggaagctcggggtcagccccgtcagtcgccgaactagggtcaatgaatgg  
agaatcattcttcttttccatgaaaaagggggcaggaagcaatcctatgggtaccctatttacttttttagtgcgtttctcagtaaaagaga  
ggagatagaaattttttactactctctggttagatgcgaaagacatacatacagtggaaggatcctctatgttatacttccactcaaccatgaatg  
gatttagatagatccgatattcataatattgaattgattcagattatcagaatgcaagctcccttgaatttaccagataccctttccctctccatggattacatcccga  
gttattgcgaaaaaaagaggttatggaagtcaatattctgcattattgctactgattgttacttagttctactgcttttacttattattatgtaaaaacagtcagc  
caaatgattatggaagtcaatattcattgaaagaatgaaaaagggattaaataaaataaaaatcaagctttaaagaaaagatccgggttgaatcataaagtg  
tggtagaaaaactacatagtttttctaccacatttagagcttttctattatattcttgaatctacatagaatagattactagattgaaatagtagtcaattcaattct  
ttttcactgcatccactaattcaatcaagtcacaaatgaaaaatccatggaggagagaaaaataatgagaatagactatagtaaaagaaaaaaagtaaaagg  
aaaaaacagcgaatcttcatgcttaaacatgctgcgaaatgttcaaaagacataaaaatfttttaagaactaagaataagaaaaggtataaaaacaatggaagaa  
atgtgcgataatgttgggaatagctccgcggaagaaaatctaaagttctattgatagaacttttaaccatgggtcgttctagtagcattatgaattgctcaccgct  
ctttctattctatttctatttctatttctatttctatttctatttctatttctatttctatttctatttctatttctatttctatttctatttctatttctatttct  
acaggagtgaaacaaaatfaagaaagagagaaagaataaaggtcggcaaaatgattatgcaaaacggtaattaagaaaagagttgatacaaacattcacta  
ctcaatcaatagtagtaccctagagtcactcctccccatactactagtgaaagagaaaatgtaaaactaccattaaagcagcccaagcagacttactatacc  
atgtaaatatgctcctattctatgaaggaatttctactattgataaatacatagtagaatacaagggtacagagtcacaaaaggggtctgacctaaggctatgat  
gaatcagttcaagaatftactcttaacaaattcttagatatttctgtagaattggggagcattaaatgataaataatgatacagccctttcttataaaaaaagaataag  
gaaacgctatctcaccctattggtatcgggttggccactactgctaaaacaaacccagtttgaagaaaagacgtgggttcaaaaatccagatcggcagcct  
tgttattctctgcccccaactatgctgggtgcaaaattgctgatttggatcagtagctataaagcctaagtttttattgtagcggcggcaccagattgaaactgggataa  
aggattgtagtccccctgcttaccgcttggccatgccgcaaaaaatagctataaactgagaaaaagcaagatttctaccacgttcttactaaaactaaacttct  
ttattctaaatctaaactacttactttttccaatcttttcaaaaaatctattcgttttttggatccagtttcgattattctcctcaaaaggattctatttcaaacacacttg  
ctaactagaaaaactccttttcttctattgaaatgaaaaagagaaaaagtgatttctagtcaaacgctacaaaatgaacaaaatggaaccattactagaatt  
ctctttttatttgaattcggatctctcccgcctgccaatfaatggcataataaaagacaatggattatgcctaaccgtatataggtaaacccaggtccgaacagca  
ttattatctatgattccccctatgtacatactctgtggagaatcgttcttaattttcattgcaataaatacttgaataaaaaaaagaaaatgactttgctatgtggaggt  
ccagaactagattggcatgacttaaaaagacttacttatttttaggttctacaacgaatcttatacttattttatagaatctactactcgaacaaaaaaagaa  
ccttcaaatctttttgaaatfaactaagcgtgctatttcaatcgaactaaagcaaaacttctagcttataaattattatattttggtttatccattcatagaaaaggag  
aaaaaatgagaatctttgctccaatcaagaatatacactgtaagtgccagaatfttttcgaggtctaggaatgtttatcacttatttctatttctatttggacc  
cctgggaaatcgaacttctgtgaaattgctctattcatatgtaatacataatgaaatcagatgtggaggtcccagaaatctatgatttagtaaacagaata  
tagattccataatgctagatcgtctgtagggattgatgaagatgagctgataatgaaatftttctcagataaacaggaacttaagattagatgctccggaatgga  
aatgaggggaatgcccacaataccggatttagtcagatcaatcaggggattttaggttcaatcaagccttggcagaagaacttgagaagttccaacaatta  
aagatccagatcacgaaatcttcaatatttgcgaaagatataatgctagaaactcagataaaaagaaaggatgctgtgtagaatcactacatcttctccg  
aattatacgtatccgcgatttaattttggttcgatgtcaaaaagcaaacatttctattggaaactcctataatgaattccttagaaccttataataatggaat  
accgaattgtagaatcaatattgctaagctctggtatttactaccgctcgaattagaccataaaggaatttctatctacaccgggactataatcagattgggga

ggaaagatcggaaftagcaattgataaaaaaagaaagfatgggctcgcgtgagtagaaaacaaaagatactattctagtctatcatcagctatgggtcacaatctaa  
aagaaattctagataatgttctaccctgaaatftctgtcttccctaatgctaaggagaagaaggattgagtcaaaagaaaagctatfttgagtttatcaaca  
atftgctgtgtaggtgggacctggtatfttcggaatccttatgtgaggaattacaaaagaaatftttcaacaaaatgtaaftaggaaaggattgctgacgaaat  
gaatcgaagactgaatctgatatacctcagaacgacacctctgttaccgcgagatgattggcctacggatcattgattggaatgaaatftgaaacgggtatac  
ttgacgatgacgataatgacttgaataaactgattcgttgggtgcggtatcttacaagatcaattcggactggctcttggctgtttacaacatcggttcaaa  
aaactatccgtagagattcatacgtcaatcaaacgactccacaactfttggtaactccaactcaacctgattttattaataactacttacgagacctcttgggtac  
atatcccttatctcaagttttgatcaaaccaatccattgacacaacgggtcatggcgaagagtgagttgtttggctcctggaggattgacggggagaactgcaagt  
ttcggagccgagatccatccgagtcactatgggctgatttgcgaatgacacgtccgaaggaaatcaacgttggactactggatcttttagctattcatcgagaat  
tgatcattgggtgggatccgtagagagtcattttatgaaatctgagaagcaagaaaaaaaagagagacaggtggtttattatccaatagagatgagta  
ttatgatagcagcaggaaatcttctccttgaatcggggtattcaggaaacaggttctccagctagataccgcaagaatcctgactattgcatgggaacag  
atcatgttagaagatftttcttccaatftttctattgggggttctctatcttcttattgagcataatgatcgaatcgaagcttaatgagttcaatatgcagcgcaa  
gcagttccgcttctcggccgagaagtgcattgttgaactggattggaacgcaaacagctctagattcagggtttctgttatagccgaacgcgaggaaagat  
catttctactaatagtcacaagatcctttatcaagtagtgggaagactataagattccttttagttaccatcggcgcctcaacaaaatactgtatgcacaaaaact  
cgggttccgcggggtaaatcattaaaaaaggacaatfttagcgggaggggctgtacgggttgggggaaactgctttaggaaaaaacgtattagtagcttat  
gcatgggaaaggttacaatfttgaagacgcagatttaattagcgaacgttggatagaggatatttatacttctttcacatccgaaaatgaaatcagacgggatac  
aacaagccaaggtcgcgtaaaaaactaaagaataccacatctagaagaacattactcgcgaatftggatagaaatggagttgtgagttggggtcctggg  
tagaaacagcgcgataatfttagtagtaaatcaacgctcagatagcgaacgtcctatatacgcggaagctggattattacggccatattggcttggatgat  
cactcaaaagaacttctcaactaccgatagttggaaagagacggttaccgagatgtaaaatggatccagaggatccctcagacataatggtcgttatat  
ttacaacaaacgaaatcaaggttgggataaagtagccggagacacgggaaataaggggatcatttcaaaaatfttgcagtagcgaagatattgacctattgcaag  
atggaaacgcctgttgatgttccaatcccttaggagtagccctccgaatgaatgtgggacaataatftgaaagctcgtcggattagcagggggtatcgttaaga  
aacattatagaatgacccctttagtagagatagcaagaggttcaagaaaactgtgtttcagaattatgaagccagtaaacacaaaaaatccgtggg  
tattgaaaccgagtagccgggaaaaagcagaatattgatggaagaacagagacccctcgaacagcctgttcaatagggaagctctatatcttaaaatattc  
atcaagttgatgagaaaatccacggacgctactggccctattcactgtttacacaacaaccgttagaggaagcaagcaaggggacaacgaatagga  
gaaatggaaattggctttagaaggatttgggttctcatattttacaagagatactacttataaactgatcatcttatagctcgaagaataacttaacgctacgat  
ctggggaacgagfcaatcacgagatcctccagaatctttcagtgcttcttgcgagaactacgatcttggctctagaactgaaccatttcttctatctcaga  
agaactccaggtaatagggaagaattgatcggaaataataaacttcttctatttctattttatgattgaccaataaacaatcaacaactcaaatggactcgtt  
cccctcaacaaataaaggcttgggtaacaaactacctaattggggaagtcgttggcgaagtcacaaggccctccactttcattataaaaccgataaacagaa  
aaagatgattgtttgcgaagaatcttggaccataaaaaagcagaatftgtgcttggaaattctcagcgcgagcggagctgaaaacgaagacgaaagatttgc  
caaaaatcggagtagaatttgttattctggatagcaagatataatgggatacatcaaacctgcgatgctccgtgactcatgtgtgtattttaaaggtcttctag  
ttatctcgcgaatctttagataaaccttaagaatftggagggcctagatagcgcgatttcttcttggtagcccaagtgctaaaaaaccaacttcttacgattacga  
ggtttattcaggatgaaatctcctgtaacatagcatttcccctttttctaccccaggctttacaacattcgaatcgggaaattgcgacaggagcaggtgct  
attagagaacaattagcagatttggatttgcgaattatttagagaattcctcggtcgaatggaaaggaattagaagacgaggggtatagtgagatgaatggaaagat  
agaaaaagacgaaataagaaaagtttttgattagacgcattggaacatttttcaaacaaatgtagaacagaaatggatggttttggcttattaccaggt  
cttctcccgaatfaagaccattgtttataggctcgggataaagtagtgactcggatataatgaactttataagagagttatccgctcgaacaacaactctgctat  
ctataaaaaagaagtgaattagcggcagcagatttagtaattgcccaggaaaaatggtacaagaagccgtggatacacttctgatagtggggtcccgcgggcaacc  
aacgagggatggtcacaataaagtatacaaatcacttccagatgtaattgaaggfaaaaggggaggttctgcgaaactctgcttgggaaacgggctgattactgg  
ggcgttctgtattgttgggtccttacttcaatcatcaatgtgggttacctctagatagcaataaagctttttagcatttgaattcgcgatttaacacgaaac  
gcgctacttcaatgttaggattgctaaaaggaaaatftgggaaaaggaaaccattgtatgggaaatactcaagaattatgaggggacatcctgactgttgaatag  
agcactaccctgcatagattagcatacaggcttccaaccacttttagtagagggcgtactattgtttacaccattagtgtaaaaggttcaatcgagacttga  
tgggatacaatggctgtcacttcttcttgaagctcagcggagagctgtttacttatgttttctcatatgaatcctctatcccgtattggggatcctattg  
cgtaccaaccaagacatgcttctgactttatgattaacgattggaaccgtcagaggtattgtcgaatagatataatgttgcggaactatccaacaaaaa  
gtaaaattacaataataaatacctaaagtatacgaagataaagaactcttcttctagttcctatgatgactgggacttatagacagaacaaatctgttagacagc  
ccttggctccgatgaaactagatcaacgcgctcattgggttaagagaaggtccgattgaagttcaatatgaatcttggggacttatcgtgagattatgccactat  
ctagtagtgggaaatagaaaaaggaatccgttctatatacattcaccactcttggctatattcttttatagaaatagaggaagccatacagatttagtca  
ggcctattcatacactatcaaacaggaagttagattcggggatcccccttgcaggggcattccgatttgcctagtagatcatcttttgcggcagcaatccagattga  
gattgaggaaggaagtaactaagtttgaatcactgactcagccattgtcgaatcctactcagcaattgtcgaattatactcagccgaaaaaggggtacttat  
ttatggcggaaacgggcaactctggttcttcaagaataaagatagatgaaactgctatgaaacgacttattagcagattaatagatcatttggaaatgggatacactc  
ccatatactggatcaataaaaaacgctgggctccatcaagccactactacatcatttattaggaaatcagggatctttaaacaatccctcaagggatggttagtcc  
aagatcggaaacaacagatttcttttggaaaaacactattattatggggctgtacacgcggtagaaaaattacgcaatccgttgaatctggtatgctacaagtga  
atattgaaacgaaatgaattcgaatttccgataacagatccttcaatccagctctatctaatgtcttttccaggagctagaggaaatcagcgcaggtacaccaat  
agtaggtatcgcgagtaatacggcgtcctcaaggacaatgattgattacattcaaacgaatttaccgcgagggacttctttgacagaatataatttctgcta  
cggagcccgaaggggtttagatactgctgtacgaacggcggatgctgatactttacagtagactgttgaagtagttcaacatattattgtcgtagaagaga  
ttgtgtactatccaagctatttctgtgagctcctcaaaatgggatgacggaaaacttttgcacaacattaaattgtcgtgattagcaaacgatataatattcggttcac  
ggtgcattgccactcgaatcaagatattggaattgggttagtcaatcattcacaacaccttctgagcacagccatttgcagcaaccaatataatattgaacccc  
cttacttggcggagcacatcttgatctgcaatattgtattgtcggagttccactatgctgacttggcgaattgggggagctgtaggtgtattgcgggtcaat  
ctattggggagccaggactcaactaacaatgaactttcactgtgtgggtattcacagggggtactgccaccttgcagatcccttcaaatggaacaaatcc

aattcaatggggattgggtcacccacacgtaccgfcagggcagcctgctttctatgftatagactgcatataactattcagagtcagatattctacatagtg  
gactattcctcaaaaagcgtgattctagtgcaaaatgatcaatgatagaatccgaacaagtaattgaggagatcgtccggaaacgtccgctttgcatfttaaaagaa  
aggtaaaaaacataattatccgaatcagatggggaatgactggagaccgatgftatcatgcccgaatataatggaatctctgctgattacaaaaac  
aagccattatgataatgtagtaagatgtagcagagctgtagctctttctgctccacaagatcaaatgaatactattcctttctggtgacggaaggt  
atatctttgctctcagtgctgatgaggtaaacatagactggtgatacttttgtaaaaaagatagggaattctgattattcaacccggatcgaatcatgt  
ccaatggctattggaattgtctatcctctattctcaaaataattggattgttagcgaaaaaagcgaagaaatagggtccattccattacagatcatcaagaacaa  
gagaaagaaccaatctctgtttgggattcgaatgaaataccctttatgggtgtttacgtagaaatactatagtgcttattttgacgaccacgatacaaaaaagata  
aaaagggtcaggaaattgtaaaatgatagtagaccctagagacgaatagagactgagagaaagactcagagaacgaataggggagccagaaaaagaa  
tataggaccgagaggaagaatgtaaaaccctagaagacgaatagagactgagagaggagatgaaaccctagaagatgaatagggtaccagagaacg  
aatatgaaaccctagaagatgaataggatcctagaggacgaatagagactgagagggaggaatccgagacgaataggagtcagagaacaaataggg  
ccccgagaggataaatggtcactttagaggagactcagagacgaatagggactttagaggagactcagaggagactcagaggacgaatagggaacc  
cggaggaagattccgcttaaaaaagggggtttgattgagcagcaggaacaaagaattagcttaaaaacaaaaagaaagtagatcgggtttttcttccaa  
gaactgcatatctgcccagatcctacccctaaaggacttgacaatagattattggagtgatagacacaactcaaaaaatacaagaagtcggctgggtgattg  
gttcgagtagagaaaaaaagccatagcgaactaaaaatctttctggagatactatttctgaaaggcggataagatattgggtgagttgataccactag  
aaagagaaaaaaagatcgaaggaaatcaaaaaagggaaattgggtctatgctcagtggaaaaaatctcaagagcaaggaaagattttgtttggtcga  
cctgagctcgtatgaaatgaacgaaggagaaatftagcaaacctttccacagagatctctcaggaagagggtaatctcaactcactgtcaatttatttc  
tcatgaaaaatgcaagtaactcaagaatftatcagaaatgtaactgctgaacttctgattgaaatgggaacaagaagaaaaagaggaggtcgtgct  
tccctttgagataagagcaaatggctgattcgcgattcctaaagaaatgggttaatacaaatcactattctgatacacgaaaaaggtatgacagaaagtcagg  
actgattctccataataggtagatcgcaccaatccaattcctttattccaaggcgaagattcaactacttagccaacatcaagagctattgtaacctgttgaatc  
aaataaagaataccaatctttgatggtttgtcggcatccaactgtctcgaattgggttttaagaattcaaaaaatccaatggggtaaaagaatcgaatcctagaat  
cctattcaaaaatggggtctttcgaattttcgggactcttagtactattgcacctagatatacgaattttctctactatttactaacgtataatcagactcgt  
tfaaaaaagcattgtctcctgacaattgaaacaaaactcaaaagacttcaaggacttaaacactcttaataaatgaaatcaaaaggactcaaaatcgaatgaaca  
tcatgttgatccattcagttaaattggcactttccctcatgattctgggaagagacatagcaaaaatcaccttgacaatattttgcgaaatgatgctattta  
aatgcacataaaaaatcaggcacaatttcattgtaaatatagattcctttgtaataagagcagctaaagccttattggccactacagaggcaactgtcatggtcatta  
tgagaaaatctttacaaggggatagggttagtctgtttatatacgaaaaagcagatctagtgacataacgcaaggcttccaaaagtagaacaatctcgaagc  
gcgtcaattgattcactatcggcaatctgaaaggagaattgagattggaatgagcgtataccaagaatcttgggggtcctggggattcttgattgagctgag  
ttaaccatagccaaagtcgtatctttggttaataagatcaaaaaggttatcgtaccaaggggtacagatccataatagacatagagattattatagccaaag  
aacatcaaaagtcgggtttccgaagatggaatgctaatgtttttccctggggaatattgactattgcgagcagagcgcagcagggcgggctttgatgaatc  
gatctattatcggcgaatctattgggaatacaagggttccctgaatcccaaaagttcatactgaagcaagtttcaagaaactcctcagttttagcaaaaagctgc  
cttacgagctgattgattggtgaaaggcctgaaagaaaacgtatgtctgggggggattatactgttggtaccggattcaaaaatgtgtaccggtaccacaa  
gacaagaacctttattcgaattcaaaaaaaaactatttgcgtcggaaatgagagatatttttctccatacgaattagtttctctgattctgacgtaacaacaa  
ttctatgagacatcagaatcaccattaccctattatgattaaaggatacaaaagcagatttttactttaaactagattttgacctagaacgctaaagaggttagatt  
ttctatttttttaattaaaaagaagtttagttaaattcaatggttatgcttataccatgtagaaggtccatcggacaattattattttcaagctatttcggctcttctt  
aatctcgaaaaagaagaatttcgtaatgaaaggtagatgaaaaaaagaaaaatcaaaaggaaggtggaaaaaatgacaagaagatattggaacatcaa  
ttgaaagagatgataagcggggaggtcattttggtcatggtatgaagaatggaatcctaaaatggcccttaccatcggcaaaagcgtaaaggactactatattaca  
aatctcgtagaaccaccgtttttatcagaagcgtgatttagttttgatgcagcaagtcagggaaaaagccttcaattgtgtaccaaaaaaagagcagcggga  
tttagtagcatcagctgcaataagggtcgtgtcattatgtaataaaaaaggtggtcagtggtatgtaacgaattggtcattactaaactagactttctcaatttag  
acttaagaagcagaagaaagatgaaaaatccacctctccaaaaagagatgtgcaatcttgaagagaaaatctaccttcaagatattcggcggatc  
aaatatacagaggttgcctgacattgtatcctcctgatcagcaaaaagatatactctcgggaatgtgccattttggggattcctactattctttagccgat  
acaaattgacccagatctcgaatatacgtattccagccaacgatgacactatgactcaatcgaattgattcttaacaaatagattttgcaattgtgagggcgtt  
ctctctataagaatcattgattaagaagaatgtaattcttggcgaactcgtatgatttaggaatcactactattctttttgtttgcatagaaaaagacggggga  
atattgataatattagagggtattgataatattatcatctgattgattcttataatataagattaatactcactcaggttgcctgagttgagaaaaagatgggtgaat  
caaaaagaattctttttgaaagttcatttttatcaggggacaatatgaatattataaccgtgttccattaaaacactcaaggggtatagatatacggcgtagaagtag  
gccaacactctattgcaaataggagggttccaaattcatgccaagacttactcacttctgggtcgaattactatcttctaggttcagttatcatagctgttcgcaat  
ccacaaccattccaaccgatgtagaatttctcgaatgtcctgagttattcagacttaagcaaaactcagattggaagaatcaggtccctgggtccctt  
tattggaactatgtcctttttttttgttcgaactgtcgggtccttttaccctggaaaatfatacagttaccctatggagaattagcagcggccacgaatgatataaa  
tactactgttgccttagcttactcactcagcggcagatattttatcgggtccttagcaaaaaaggtgattgatttccgagaatataatfaaaccaactccaactctttacc  
aattaacatattagaagattcacaaccattatcgttagtttcgacttttcgggaatattggcggatgaattagtcgtgtgttcttctttcttagtcccttagtag  
ttcctataccggtcatgttcttgattattacaagcggattcaagctctatttttgaacgttagccgcaacgtataggtgaatccatggagggtcatcattgaatt  
gactagtttcaaaaatgcttttttagcttaactcaatcatgcatggttcggaaatcgttgggttggaaaacaaaatagttgaattgcgtatgaatatacaatcta  
gagttgtagaagagagaataggctatattacggaattgcaaaacaaagatatagcattaggggagggcggagtcaggctagatctatattctttatgctataaagtt  
cagtcattttgtatgggttccatttaaggaaattttttgaaatccgattcaatagaaaatgagaaaaacacaacaaaatagaagaacaaatgataggatatt  
atatacccgaattagattcattatcaatccgatataatggaatcggattccatccaatcagatgcagcatattgttatcaattggatcttatttaattcctattggatc  
tggattagctcattccatagggttctctctatttacccttttattatgaattagatgtaggggaaaaatagaacccaagatcgaagaggaagaagaaga  
ggatggaaatgaaagatcagttggttgaaagaaagagaatagaataatgagtacacaaccttaagtattagaactaaaaagagatctcgaagcagttcggga  
gaattcagattactgttcaattgtacttttagttactctgtccaatagagcttagaataatgaatttctggttattgtatcttaaccatttctttttgacagaggaa

ctcatcatgaatccactaattgctgctgctccgftattgctgctggattggccgtaggcttctcttattggcctggagttggcaaggactgctgcaggacaagct  
gtgaaaggattgagagacagccagaagcagaaggtaaaatagcggctactttattgcttagctagctttatggaagcttfaacaattatggactagtgtggcact  
ggcgttttattgcaaccctttgttfaatcctaaaaaagaaaacgagccttttagatagatacttctcttttttagtaattggtattgctctgcaattcaattat  
caatacttactcctaatftactcctagagtttctattttagggacagacaatacccccagggaatagctgattgaggatgatcaatttagaggatagttc  
ccgtctgctcccgccctttgttagggcagtggaagtattttcttttttaggaattttgggaacattcaacaaaggaggctttcacaggcaaacgagatcta  
agacttaatctaaaaaagaactactaaatgaatctatttctataaaaaaattgcattaaaaaacccgatcaaaaggcggagcgaagtaagatcgaaaaactt  
tcttctgctcctatctataaggagagcatatgaaaaatgaaccattcttctgttttttagctcactggccatccgctgggagtttccggcctaataaccgatatt  
gcaacaacttaataactaactgtagtggtgtgattgatttattggaaaggagtggtgctgagtgctattcaagaatagattggatctatccggctgcact  
tagaatatttttagtattttcgaataaataagaaaagggtgcacgatctcgcgaattacttctgaataatgcagaaatcatatgaaagaaccatagcatttcgc  
cattggtaaatcaatcaactttgattctctatagaccaataatgagaccattaacggtaaaagcctaactgcttgaagcttaggcaaaagggtacttctta  
caactatattagtagtaccatgcttfaaacaggaaatagctaatgtagaatttctgatatagaacactcatatcgataaaatggttgaactattactagaagg  
ggcaccctgccctttttatcaatgccgaatgcagacatgataaaaaaggagaaggttttggattgaaagaaaaagtaggaattctatccatttccatt  
ttctatttagttttctaatgaaattgaaaaatfaactaaaggcacaatacaaaaaaacactttgctgccacgatagtttttatctaggcggaaagatcctt  
aatattatctagcttatagggttcggtatattgaaatataaacagaaaagagggtagaggatagggctacattaaaaaaaatggaagtagccatagcaa  
aaaaagaaaaaggagcgtgagagcaaatgaatgaaagattcatgtttgctgggaagagatcaaaaagttaactaataagcaagtaactacttcat  
taaaagattatagataatcaaacagagagcttgagactattcgaattcggaaagattcctagaggaaacattgagcagctcgaaaaagctgaattcgatt  
acagaaaagtcgaactagaagcggatgagatcgaatgaatggatactctagatagaacgagaaaaagcaattgattaatgccactctattagtttgaacaat  
agaaaagcttaaaaacgaaacccttattttgaaaaacaaggcgcgatgaatcagctccgacaacgggtttccaacaagccgtacaaggctctaggaactc  
aatagttgttgaataccgagttacatttccgtacgattctgctaataatgcaattctcggggccatggaatggaagagttaaatattaggcctgaactctacttcc  
ttagaatttagcattattttcccttgccttcgaaaaaaaatagtaaaagaacactaatggcaacccttcgagtcgacgaaattcataaattctccgcaacgat  
tgaacaataatagaaaagtagggattgagaatctggctgcgtagttcaagtggggatgggattgctctattataggcttggtaaaatgtagggcaatta  
gtcgaattgcagaaggactaggggtattgctgaattggaatcaaaaatggtggattgattaatggcgcgatgggtgatacaagaggcgactttttaa  
aagcaacaggaagaattgctcagataccgtgagcagggcttacttggctgtgtataaatgctctgctaaacctattgatggagaggcgaattgtagcttc  
gaaatcgtcttaattgaaatcctgctccgggtataattccaggcgttctgfatatgaaccctcaaacgggcttattgctatcattgatcttattggcgcg  
gtcagcgagagttattggggacagacaaccggcaaacagcagtagctacagataactcctcaatcaaaaaggcgaagatgtaatatgtttatgtagct  
atcggctaaagagcattcctcctgtagctcaagtagtaactattccatgaagaggggccatggaatacactattgtagtagtgaattggcggattccctgctaca  
ttacaatcctgctcttatacgggagcagccctgctgagattttatgtaccgcaacggcactttaataattatgatgatctccaacaggcacaagcttat  
cgccaaatgctcttctatfaaagagacccccggcgcgaagcttaccaggggatgtttttttgcaattcacgcttttagaaaagcgcgtaaaatattctt  
ttaggggaaagagatgactgcttaccatagttgagactcaatctggagacgttccgctataatcctactaatgtaatcctaccatagatggacaaatattctat  
ccgcagatcttcaatgccggaattcgcctgctattaatgtggatttccgtttccagagtaggatccgcggctcaaaataagccatgaaacagtagctggca  
aatcaaaattggaattagctcaattcgcagagttacaagccttgcacaattcgcctctgctctcgataaaacaagtcagaatcaattggcaaggggccgacgattac  
gagaattgcttaacaatcccaagcaaatccttccagtggaagagcagatagctactattatctggaacaagaggatattctgattccttagaaattgacaggt  
aaagaaattctgtaggattacgtaaacactaaaagataactaaacctcaatcaagaattatattcttagcaagacattaccagggaagcggaaatcctttg  
aggaaagctattcaggaacaactgaacggtttccctcaggaacaacataaattttgacgctactctttagtagaagtagtagaggaaatcgttagaaa  
gattttctattgaaatcgaaaaaagtttcttagtttttagtatgattttaagaatagatagaataagattgctcacaataggattgaaactatcaaaaggtttag  
aagacctctgctcatcaatagacaatggacgctttttcatatttcttcttcttcttcttcttcttcttcttcttcttcttcttcttcttcttcttcttct  
aaaaaacaatgcatatacaaatgatgatcatatataaaagaaggaatataataggagcggtagtgggaatcgaaccggcaacccacggttagagcctgt  
cagctaccaactgttctatctgtfaactaaagagaggggaactagtggataaaagggggtgaatcggccctctaccatctatacaatagaatagccat  
ttatacagaatgtaaaagggctcttctacgatcatcaatccagaatccatacaaaatagaaagggtatttcttaccactggatcttcttgcaccggtaac  
aaatgcatataaccatttctgaagtagtgcggatagccaaaagctcgcgatagttagctctaggtctccggctcaaaaacaacgtcagatgaagcgtgctggt  
gcatattacgtggcagggttgaattttctcgcatttctgcttcttcttcttcttcttcttcttcttcttcttcttcttcttcttcttcttcttcttcttct  
ttctgttctaatcttccgcttctctctgaatcaaaacttttttgcataatgtccgttctctatctaccaagtatacgggttctatctagatgaaaaataaat  
agaaaaagaaatcaagaggcggatcctccccctccatcaagagtaatgaaactaggtcgtgatacagtaaacaaaataactaaataacaaaacttgcctgatgt  
tgaggcaatcaagaagcggcataagtgaatataaccacggaagagtagcctaaccacaaatctgcttgcaaatgaaagagccacggcttattctc  
cagcgaattaaattagcgaagggttccgttcatgagccatgctaaagtctcaattaattctgccaatctcagccaggaaatgaacataaatccagtcgcc  
caacaagatgcaaaataagaactccacgcccataccgataaactattcctcaaaaaggattatccattgataagttggaagagtttaaccataggaatctct  
taaccatccatcaataaaggaggattcaaaattgaaacgttccctgccataatgtgatgtttccaatgcaataaaaaagtaaccatcaatgattttaa  
catccgaaaactgcaaaataaacgcgtcccaagcagaatatacaagtagccgcgaccaggggcgtcgaaggaaaactatatacaaaactttttatcc  
ggcattatttgaaccgcgtcatctaaagcacccttactaaatcaatgtagttgatgcaaacctaaagcaatagcatgatgaaccaagaatctccaggctccta  
ttgtaagaaaagcgaattactattctgtaaacagattcaaccatccgggtaaccatagggctgaccggcattgaaagcgggaccgctggtgaagataagata  
tctgaaccatattgcttaccatgagccgattgatccattgagcaaatataggctgatcaagatttcttctggagtaccaaaagcaagcatgacgctattat  
gaacataaaggcccaaggtatgaaatctaggaagagactgccaactaaatgagatagatagctctttatggtctaacattcttccaatcattatcctcattct  
gttccgattgtaattctaatgaaaaaatagctccatgagcaaaagccctgtcatgatgaacctgcaatgtattggtgatgatatataaagctgcttgatgata  
aagcttctgctatgaatgataagaaggtaaaagtagacatattgtagctactaaggaagtaataaccctaaagaaagctagagcaagcctaattgaaatgaaatc  
gaattattgattgctgtaaaaggcccttattgcccacgcctaatgacccccggaggagtagtgccttcaaaagatcttgatactggtcccaattccgaagttagt  
tcgatacatatgaccgcaatgaaaaaataatgcaatagctaaatgatgatgagcaatctcggcagccacaacattgtgtttggtggaatcccccaagaa



gagttagaatagcagttcccgtccttgagtggtagccaataaatgactctgaatcggggtttgggcataaagattccactgaccgtcagaagggtccaac  
ccctgtggataggtaatacctaaataatcctcgaacgtactctccctggatgctggaatagcgacatgaactaaatgctcgtccaagcacaagaactta  
ccccgaaaagcctgacaaatgatgattgagacgagattccgcttttgaaccacgaaaggctgtttccatttgggtgtagatgaaccaacccccctattaaagga  
tagggtagaagaataatgaaaaagactcctgtataaagatcttattgctcgtatccaattgtataaccactgataaacccagaatagcggatattact  
ggaccggcggcctcctcagtaaaaggctccacagcggggtgaccaaaatgagatccaatcgcgatgagcaataggtctacgtgtaaaggatctgtatc  
catgattcaaaattccttccaagcgcacatgaacagatttccggacgtccatagaagatttctgaattgccaaaagtgagaagcaaaatgttctgataaagac  
gttctcagtaataatcatgactttcgaatcagtgccgtagcaatacacaacaaatagcagagtagtggggtcctgagctaaagccttggctaaacctgggaa  
atcttaattccataatgccttcaaatcctcctagcactatcctactgcaataatctcgtgaagaagaatgccatgttggcaattccaccagaagtaagggt  
actctacagcagctcctgtataatgctcaaggctctaggtgagtagcagagcaacttttaattgttatgagcccaacgatagattcaatcagttcttccaata  
accacggcgtgataaaaaacattaaatgaaggcccagacaaaatgagcacctaaagaaaaaagaccatagcggataatgaagaaccataagactgaatta  
cttgggatgcctgtcccacaagaatctcggaaccaccattaatcgaatggaactctgtcaaaagtccccctgtgatatgattaccaccctgatcattata  
gtaccccaaacatccgactcattttcactgaatgaaaaatgactaccgaaatggaattgacatccagaatagactaaagaaacatgatccaggcggatc  
ttgacatgttcccctgcccaggccatcgcaagggaagcgaacaaagattgctttatcgggtatcaaacgggactcgagcaaaataaacaccttcaaa  
agttaataacagtcacatggattgtaaatgcgtgaatgtagtgactaaaaatcgcgggtcctaattggaataggaacaaagcaacttggcctactgtacta  
actgcccactcccacgttaagctgtgactgtttgaccaggagctgtacgtaggcgcggccagcatggagatttgtaccattgagcaaatcgggtgta  
attgatggcggatccgaaacatctgtgggacgacctaaagcactcatggtatcattgaatgataaaccaaaactgtgaaaacctgaaatatacaca  
gtaaggtgggatagattgcatcaggggtgtcgaaggacacgtatcatgacgttgcagtcgttgatcatagctctaccataaaatggctgcatgtgcag  
cagccaactattagaatccgcaatccacatgtgtgtggaacaaggaaagtgtgtaccatagtagtagtagtggatggggtggcagatgagtagat  
atgatgagctacaacaatgggtgtagagcctagctaggttaagagataattgagcattgccattgttaggtttcagattcagagacatttggcctgctc  
taaattggcctttatgagcctcaaaatcttccaggccatgaccaatcccaagggtgtcctatacatgacctgcgacaggaagaatagcaatgactaaatg  
atgtgagcgaatctgctcaacatagaccgctgttattggatcagccctccgcgaaactaagaatctgcgtatttggaccaattcaaggtgaaaaagggg  
ttgctcttcggcaaacatagataaagtggccaaaaggctcgactcaagataaattcatgaggaaagtgtatccttaggatcaaccccagcgtcaagaat  
ggfataatcgtaaaagatactggattgtgccccgcccaagaagagaccaagctcaataacctgctaagtgatgattaacatggattctactgttgaacc  
aggctaatttgggagcggcttggataatggaaccaccagcaaaaagcattaacgatgcaaaaatcaatgcaccgattcggtacaatagattgtaattacta  
gttattccggatgctgccaaatctgaaaaaacccggaggtatttggatctcggaaacccccgcctacatcaccattcaatatttctgacctacgattggc  
tacctgagcactgggtccaatgtagtaggacactgacatgcttcaatattgaaaaacgggaccatggaagtacatgccactcaacaaagaaagataatg  
gagagttgaccgaaatgagcactaaagactttcagagatctcctcaaatcactgtatgactcgaatcgtgagcatcagcatgaggtccagatccaagt  
gtagtatcagggccttagctattgcttggaaaatggcgggtctggccatcctcaaaagatgttttacaggatccctaccacaacattttactctgtcc  
gagcaatcattaaagctcctcttccggacaagacatacaaaagaccgcccaacttttagtaacctttgaaagatagatattatgattgccttttctta  
ctatctaccgctcttatttttttagttattcactggagcaattatattgagtaactcgtaggcaagtgttcggatctattatgacataagattgggtgc  
acttttttacttggattctccacgtaacaaaaaaccttttttaatttaaaagctagctatttttttaagagtataagctccctatctatctacttctt  
agattttttattcattcaaatcccaagataaactattagaattatataaagatggtcctgatatattagcaatatttatttggccctttttattcctt  
gacctatcgttattccttataaataataaataagaaggcagaggaagagatataatgaaattctgattcgtctccgacctaatatttattgattaatg  
caacaaacccccatttctgaaaaaggagagtggtctattcaaatcaaaagcgtctgtaattctcaaccagtctgtctcaatataattccggagtaagc  
tagctgtttccaatctcagcagctgatcaaaccaagcttcaatctgaaaccctgtagaatggcctgtctccccggcgaataggtagtcttccctca  
gaaccgtactgagatttctacatcagcgtcaaaaattgctatctaaatccctgtcttaactgaattcgaatcgaatcgaatcgaatcgaatcgaatc  
cagaagaagtaattacctaagttcaaacctaaatattgatcaataatcagttgattcttcccacctgcaaaaaatgaagcatagatagacctatctc  
cgaatttctgaaaagtaactatcctggttcatatagaattctatagaatccttgaaaaagacttttcccataagcaaaaaagaacttactcttggg  
gatactacaccgctgttaacctttagtgatgcgctctattacataagcggattcctaaatgttcccatacatggaataagaagcagtttttagt  
ccagtcgctcactaattgatctttaggtgcttctctatcaattgagaactctacatagatagtaggaccatacttcttctctatttgaattctcgt  
ttctctacagctgataaggcaaaatcgttgttgacgatccctatgtaagaagccccctttagtaaactagaaaaattgatccttctattttcttata  
gagatagtcgcacgtaatgacagatcagccatattataaaagcctgtgtgaaagggggttcgtctagtcggcgaataatctcaaaccttctgact  
ccattgctgtgtataaggcctatggtatagtagataactctgatcatagggaatcttagtcgctagctcaataaattttgcaagctccgataattcct  
cggattgagccaacatcgttaccgtctctctattcaaaaaatcctgctcaaaaaccgtacatgaggttccacctacagcctcctcctctgacata  
aagcgaaaaaatctagagaataaataagaattgttccatctcattagaccgaaagggtggtattttccaagaatctctgccaacctcccacaagg  
tttctaacaccaatgaattctattatgctagaggaaaacgatagctcaagaatttctgttctcaacgcctctatttagaggaaatgaccactcaac  
ggttatagggtatccaaagtacaaactgatggtgtttgtatccaaccattctcccagcctgataccaatcaggaagggttaatttcaacaagtttct  
ttgattcctattctaggtgtagctttatccctatgctactatttagtagtagtagtagtagtagtagtagtagtagtagtagtagtagtagtagtagtag  
atactaaaatcacaattgaagcattccgagccgctcagtcgagtagacacgagaaggaggtgtagttcactcactccctaagcgtgggttcccctacta  
attggtttctcctccggaacccccgctcttctcgtaaaaccgggtgtgtagtaggggtcaaaaaacaaaaaaagagcgaatcgcaccatctataa  
atgcccttttccccggaggtgtcgaatattcgaataaaatattgctacaattgagaaggcttcaatgaatattccatttatacgggatctagga  
aaccattctatctatagaaattcttcttctccttcccaaaaataacataaaaaaaccaatcattcaatttataatcgcctctagcctcaatgg  
agaggtattctgctcagcccaatctcttcttcttctgttgaacaagaagagatagaaaatattgactaagattggatttccattcctattcttcaac  
aaacattctctcatcaatatttccgatttcaaaagtcaatcgtcccataccctattttctattgattgtatgggtaggataccttgcacaagaatct  
ctttttatcgataaagaatcttccattcttcttcttctgttgggaaacccaacataaactttcaggggagcgaattcctagtaaaaaatcctggacc  
gtccacttagatgaaaaggaaatttctctatcaatagaacaatggaactctcgcgcgggtgtgtgtacctgtactgcaggaaataggaaaactcgtatcactcagtt

ttttccataataagattatggaggagagatggccgagcgggtcaaggcgtagcattggaactgctatgtagacttttgttaccgaggggtcgaatccctctcttccgt  
ttttctaattcagcaacgtaattgattacaatgatcaaatgacaatttattccagcaataatacaatcctttatftaataagaattctctataccaatfactatggt  
atgtaaaatacacatagaggaaagaacaaaaacaaaaggaaatcctagggttaaccatttctgttaggtgaatgggaaatacgaattaagacctaaggcgtgatt  
tagttcggggaaaagggaagggaagaaaattctatgaaccttccgttttccaaagtcaagttgacgagagtaattctacaactaacactatttttggaga  
ccgaccacttctatccaggatttttactagctttatattgcaatgtgcaatgcaatgctttggcaattccccgggctggatgaagcaatagaatttgaac  
cagactgtttgatctttggtatctctgtagtaataatctcgggggttgcacgaaaacttggatatacactatacaccattaactaaaatattgctatggttaactaa  
ttgccggcctcgggaatggtgaagccatacctaactgaaaaagataattccaacgcattccaagtaattgtagtaaacctgacctgtgaacttttctttcc  
agcgatattgacataatcaagtaattgctgtctgtagaccataatgaaaacgcaatttctgttttctgaagacgaatagatattgctttttccagaatggaattc  
ttttcagattactccggatttaggtgttttctagtgagcctgtaaaagctccagacggcgtatttttaaacgaggtcctcgataacgggacatgaagactcctt  
tttattgaaattcattttacacaataattcattgtatttaccatacagaatacctgaaataaaactgaattaaagtaaaaggataaacagagtaaaactctactaaaagta  
ccacaaaaaatggaattcacaactcgaattttgtatataatttttttttttttttttttttttttttttttttttttttttttttttttttttttttttttt  
catttaattcgggaaaaagggtattttgttcatggaacattgatagagaaaaagccgactatcggattgaaaccgatgacctcgcattacaatgcgatgctct  
aacctctgagctaaagggttaccataacagaaaatagtaacaaatagaaatattgatagataggaatcgtaaaatgtagatcttaattatattacttactatata  
ctagttcgaattggaagtctacttagaaaaaactagaactcataaaataaagttagatagatttttgaacttctttttcttaattcgaactatttttctaata  
gaactattccaatttctatattgaattgatttagatattttatattgatagctcggacgaataatcaatacagataaagaataataatatacgaacata  
ataaagagaacatgcgaatttctgtatttccagccatcatatagacatttttgatattttgtttttgtatttgcataaattaatgattaatttctactaaggagaa  
catagaatcatagcaaatgaaattgctaatctgattagcaaaaaaagaatgaatcaagcgtatagtagatttgaataacttaaaaaaggaacgcggttaggt  
gggggagagaaaaacttgggataattgattcgcattgaaatcaatcaacgatagaatcaattcaatgctgaattgcaataagcggagctctcaactaga  
gacgaaccgctagactacatagagtaattcaacgattcaaaaaaactcaacagatggagaaattgcaaaaggaaactcctggtcgaaggaacccctggaattaaa  
gggatatggcgaatcggtagacgctacggacttgattgtattgagccttggatggaacctgtaagtggaacttcaaaactcagagaaaccctggaattaaa  
aaggggcaactcctgagccaaatcctgttttgagaaaacaagcgggtctcgaactagaaccaaaaggaaaaggataggtgcagagactcaatggaagctgttcta  
acgaatcagtagtaattacgttgtgtgtagcgggaactcctctaaattagggaagaagggttctgaaatcaatacacacgtagatagactggcatagcaaacga  
ttaatcacagaactcatataatataagttctttaaattcttttaaaatgaaaatggaatgattagaatagaatcataattttttagaattgtgtgaatcattcc  
aatcgaatattgagtaaatcaaatcctcaattcatagtttccgaaatcttttaaaagcggattaatcggacgagataaaagagagagctccattctacatgcaactg  
acaacaatgaaattctagtaaaaggaaaatccgtcgaacttctaaagctgtaggggtcaagtcctctatccccaaacctctttatccctaactctagatttctctg  
tttttttataataggttaagattcaatggaatacatttctttttattatagatcggcaaggatgctgattataactgatatttaataatattaaataggttctttgtac  
aatgcataggactccccctcccatttcaaaatttggatattgacatagatacaaaactctactaggatgacacaagaaaaggcaggatagctcgttggtag  
agcagaggactgaaaatcctcgtcaccagttcaaatctggttctggcacagaaaaaggatctccgaataggattgatacaaatcctcagatgggttgg  
gatacatattgtaataatagatagatgatttttcatagtagataaactcctaaatagaggcacttcttttctgattttgaatttctaattttctattccgctatt  
ccgacaataatttttattctgtctatctacttctcctagttgttctaaagtaatgcacgcggtacaaagttcgtgtagggaaactctttgagtcacatattttctgtt  
catacgaaggaaatgaatattgattttccaacgaaatgaagccctttttgcttagctatctgaacctttgtataattggaatfaattagaatgtaataaggtattctgttcc  
atctaggaacagagcgtaaaaatattccttgaactgcataaaatctggagttgtgtgtataagtgagcatgaatttcttatcattcaatgagcattctgtatttcatagaaa  
ttgggggttatatagctctacgtaaggccagcctatccaacttccagcattagatagcgttaagggcgtggatgattatcataagagattcccacatcaaaaaa  
ttccgcttctgaaaatcggaaacttccaaatccagaagacagatggattctaggattatccttttggcaaaagactttatgcatacttctctgggttatctataccat  
actgtattctcgtaatgatacagctagctaaagatccaccgggtgcaacgctataagcactgggaacgtaaaatattgtaaccatatacatataaaatgacag  
caatggaatcccaatcctctgctttatttgcaaaagtctattctctgatgacgaagcccaagatctatgaaccacctcatgttactagccaatgataaccaac  
cctgctgactattctgatctctcctctgtataaatattcgcagttcgaatgcaagtttgaatattgccctgctcttttttggcacaagagctcctcctaattcac  
taattttaggaaagactggacttttgatttgaaaaaagtccaagaagatagctaaagtagatggtgattgatagagcaattctgtctataagttccagatattgac  
tgcgccacataaagcttggctggtgtagtaaaacatcattttctttgagatagattcctcaactatttctcgcgatacttctacgaagttttagggca  
tctataacagcctctgttttaggtggcgaaccggcaagtagacgtccacaggaatfaactatcaactccccgaacagtagctataggaatccgactgaactcca  
ccagtaatagtaacagctccatagcaatgacgtattttgggtcaggcatttgcctataatctcactaaagagggaagccatttctattgtagctaccgctgttaaaa  
ttaggtccgttgcctagcattgatctgtaccatccataacgatcaaaagcgaatcgtgagcctattaatgaagcaaatcaatgaacaacaactgtagccata  
tagaaggggccataaaactagagacttgaaccaattcgaagatcttttagttagttgaaataaacggaattggaacttgttggcaagtaggggaaactcaatcaaa  
ctcataactgtctaatggaacttttctctttttttttttgtctgaatttcaagtttaagaccattccaaggctcttttccatgcataaaactaaaccaacaactagata  
agcacgaaaatgaaagcttgataaaaaagcgtataccaatcagctgaaactcattgccaagggtagagaaaagaccgttccacatcaaaaaacaacaaaact  
agcgaacatgtaatagcgtattcgaattgtaaccaagccccccatgggttctataccgattcataactagaagccttctctggtccttcagaaaccggagct  
aaaagtgtgaaatccaaaatgctaaaataggaaataggcttctattatagaatgccccaaaaatcatattcgtgaaagcagaacataaatgtactcccattat  
gtggaataggcgaactgaattagcaattcaagtcagcattgcaatttatacagaatttctcttttctcgtgaaacaagcagcgttttttcaaaccaaaaggc  
ttagtttagcctttgttctctttccacgtcttcttaagattcattcaatggaatcccactccttttttttttttttttttttttttttttttttttttttt  
tagaacaacaaactctcctcacttttctctatatttcttagaactctagaaaaaggaataaaacgaaaatactacgaattagagcctaattaaagatagatgacta  
atgatgcagcctaagaggatfaattctataaaaataaagaactctatttcagaacgtagatcatttagatttaggtaactctatagatagataagcaagtaata  
cttcaacaaagtaggaattcgaagatggagaacatctgcagttgattgatagaatcatttttcttctgctctataatttctgatgaatgagcctctggaatcc  
ttttatctattttatggcgcagcgcctgtccagctataaacaagtagtaaatagggaatgaaaactataactaaagaaaacgtagatattctctcaaaatcaaaa  
aaggacatattagggtatagcgaacttagacccttctgtaaaacagatcaaacggattattatcgaatgattcgaactgttcaagaccacaatgcatt  
tttttgcattgggctctttataactgatagaagatcagttatgcccaccatagtttttcttaccgaaagataatgagatggctccctgcgctctgattgattttgtatta  
tgatctatcaagagcaatacaaaagtgttcaaggaggattacctgacttaggtctgctccggcctaaataaatcaacctaaagtaaatagatgctctatcgttcc

gctacaagagtgactatgagactcfatacaccttaaaagttcatagaacgaaaagaattttttggaggcccttatctcattaagcctagcatttagtgggctggatatt  
acctatcaactagcaaatcaataaaggttctatttggtaggcacctggattggtacctgaatcggactgaaccaactatttgcaggcgactgttctcttctctcga  
atccatgaagtaagacattgatttgaagaagatccactatgttcattgcataataagctcccttgaagaacattggcgacgtgtaaacgagttgctctaccgaactg  
agctatagcccttgcagagatataatataatagagaatttctgtaagatgaatattcttaatagtagaggatattcttctgttactataataacatacaata  
acgaagcgggtattgctataaaaagattcgaatcataatcgaatgaaagggcttcccttgggtgataaattgcctacttaactcagtggttagagattgctttc  
atagcgccgggagtcattggttcaaatcaatagtaggttaggtgtagaaaattactagatagcattggccctactcgttcgctatcctaataattttctaccctct  
tcccttttcttctgatacaactaaaccgttgggtgtctcaatagtaggggaatccaattaacagcctcgaactcgtatcctagctcgtctgagagctacctcgttcaa  
ccaatttctctgacccctagctctactcagttagctcgggtatttcaagtgctgtgagcttcccgatcaatgtaactaccagttccgcatatttctaaatg  
atgactcattataactattctggcaaaccgctccacagaaccgctgtaaccattgacgttgagggagcgtattctcaagggaccatattctacagctgtgtaat  
gggggctgtgttggtaaacgccaatttggccactatttagtagataaaatgatttcttcaactcacaatcccaataattcgccttaggagtcagtaataaagattaat  
ttcaatttctcaatttgttctcttcttaagtttagcttctgctgactcctcgtattaccacaaataaaaagcctgttcggtaggagcgtcaatttctccggaaa  
ggattagttgaaatccccataatgatttctgcaagaccaactatttccggagaaccggtaaaaacttctgcccacaaaaaacggttgtagataaagcgtcaattt  
tctgtcttctgctacagttaaacgatcctcctcgataatcacaaccaagaattgcgataatgtcctgaagttcttgaactgtttaaagttgcttaactcttgcg  
cagttcataatgttcgttccaacgatccgaggtgtaacatagttgaggtgaaatcaaggatcactgcaggaataatcccttggaaagtaactctctggaagt  
acggtagtagatcaaatgtgcaaatgttagcaggagcagggtcgtcgaatcgtccgacgtacataaacgcttgatcgaagttatagatcccttttagta  
gaagtaattcttctgcaagaaccatttctgactaagagtaggtgataaccactgcagagggcattcctcaataaaggcagatacctccgatcctgttgaac  
aaaacgaaagataatcgtatgaatgaagcagcttcttataacatctcgaataattctgcatagttagggcagtaaaaccaactctacacgagctctggc  
ggttctacttggccatagactagcctacttctcaagatttttcaatattactccagattccttattcctataaagatcttccacagctcagagctcgtcc  
cctactccgcaaatagggatacggccccgtgagctttagcaatattgttgaatattcctatgtagtactgtttactactcccccaaatgctccgattttc  
ctccagccgataaaggagctaaaagatcgaccacttaataaccagtttcaaaagatggataatttctgatctaacctgataaaggcggcgctctatgaatggg  
aatgttgactagtagtctacaggaccaaatgtcaacaggctccccagaacgttgaaaatcgtccaagtagtctccaccgacaggaactgagaggagctc  
ccgtgcaatcacttccctctctcatcaaccatctgtagcactcatagctacagcttcaactgattttcctaataattgttgactcacaagttacattaattgctt  
accgtcagtgctcgaacttctgactaccaaagcattataatataaggttaacttccccgggggaaaagtacatccagcagcgggtccaataatttgatcagacccc  
tgtacttttctcaattgtagaaccgggagcagaaagtagtaggttgggtctcaatattacataatttcaaaaaaaggaaattatcgaatttgatttttctt  
gttgaataatgcaaatcaacacaaaaaatatcaaaaatcaaaagcgaaggaatgaatagtttaataaagagagaaaaggggaccagcactgtgatt  
tctgtcccaaacgaatccattcaatcttactcatggaatgagctcgtcgaaggtcaatcaatcttttctatataatgttgccttttgaaacgatttgcctact  
ctacttcttactagactcgaatatacaaaaatataactactgtgaagcagataggtgctgcaacagagaatttctgtagtatttaggtatttccactcaaaataagaaaa  
gggggtctattaagaacttaataagattagaagttgatttggggtgcctatattatcaaaagagatatacaataaagattggtgaaatcaatccatggttaata  
acgaagcatttaacttaccataacaacaactcaattctatgaattctatagtagaattcctatagcagatagaatgtacacaggggtgaccattatataatgaatgaa  
catattatataatgaacatattcattaactaagcatcccccttcttaagattgatttgaataatcttttttaagattttgcaaaaggttccattacgccta  
atccatattcagtagaccctgtcgttggagaattcttaattcatgattgtagggaggacgtatgtccaccacaacagaactaaagcaagttggtttaaagct  
ggtgtaagattataaattgacttactacccccggagtagcaaaccaaggacactgatacttggcagcattccgagtaactcctcagccgggggttccggccga  
agaagcaggggctgcagtagctgccgaatcttactggtacatggacaactgttggactgatgacttaccagcttctgactgttacaagggcgtatcactacat  
cgagcccgttgggggaggataatcaatatactgcttatgtagcttaccattagacctattgaagagggttctgttactaacatgttactccattgtggtaacgtat  
ttgtttcaaaagccctacgcctctacgtcggaggatctgcgaattccccctactattcaaaaactttcaaggtccgctcatggtatccaagttgaaagggataa  
gttgaacaatacggctgtcttatttgggatgactattaaacaaaattgggattatctgcaaaaattatggtagagcatgtatgagtgctacgcgtggactga  
ttttaccaagatgatgaaaacgtaaaccaaccattatgcgttggaggaccgttcttcttcttctgcccgaagctattataatcagagccgaaaccggtgaaa  
ttaaggggcattactgaatgcactgcaggtacatgcgaagaatgattaaagagctgtatttgcagggaaatgagggtcctattgtaatgcatgactactaac  
cgggggattcaccgaaactagtttggctcatttggcgcgacaacggcctacttctcactcaccgagcaatgcatcagttattgatagacgaaaaatcat  
ggtatgcatttccgtgatttagcctaagcattgctgtagtctgggggagatcatalccagctgtgacagtagtaggtaagttagaaggggaacgcgaaatgacttta  
gtatttctgattattgctcgtatgatttattgaaaaagatcgtgctcgcgctatcttctactcaggactgggtatccatccaggtgtataccgggtgctttagggg  
gactcatgttggcatagccagctctgaccgaaatcttggagatgatttgcatttgcgaatttggggggaactttaaggacatccttggggtatgcaacctggtcag  
cagctaatcgggtgctttagaagcctgtgtacaagctcgaacgaaggccgcgacttctcctgtgaaagtaatgaaattatccgatcagcttgcgaatggagctc  
gaaactagccgagcttggaaatagaaagcgtacaatcgaagttcgaagccgtagataaaactagatagtagtaagttggataaaatagatagaaaaagg  
tctaataaaaaaagagagaatagaagatcaaaaatcagttacgaaatgcagtaattcttcttcttcttaattgattgcaattaaactcggctcaatcttttctaga  
ttgagccgagtttaaatgattttgatacgtatgagactgacaaatcgggattcctctattctatatttgaagataaaaggataatacaataaataaatacaaat  
atagattatcataatgataatgaaatcaaacgcagttatcacgaaaaagtttctatttgggaaagaatcaatgacatacaatgacttacagagctatgatcattac  
cctttaaaccgggttattctacttctagatagagaaaaactaaaggagaatgaatgaaaaagacagagtttggaaagttagacccttctaaactctcttct  
aaaaaaggacatttgaacttttaacaggcacaatcgtgagtaacaagtgactcgaatgctcgaagaaaagagaatttctcaaatggtagaactagat  
gacgaagtttctataacctgatgaagagtagttttgatttactcctgatcaagagcagaaatcttctcattcagattgactgctatagaatctggaccatcgt  
agagagctcaaaaggctcctgatgataaatacattctcggcaactccatggggctatgggcttcaacgcgtagacttttctccgaaatttctggagcaaa  
cctccgaccaacgatacaatgaaatttcttattcacaagaaaaagattcggaaatcgaatgctactatagcaccggaggaaatattcggaaattatcttata  
atccatttctgcgggggttactaacaaggactcgtcgtcacgagacgaggattcgtcaaaagctaaaggatccggattttctacccttgggggtgtatag  
gcctcaaaagctaaagggtagtagatctgtagtagttaaagaatttgcctctgattgagtagctatttccctcttaccgcgattattgatatgcttctag  
aagagcagctatgcagagaggaatattcagtttaataaaaaagcctaaaaaagttaacattacggcaatcaatcaactaaaagctcctatgatcaatccttacag  
cggatttgggggtccgagagtggtgaataagattgcatgtggaaggagtagacgaaaaagatttggattcgaataggcgcattcactaagctgactttga

atccaattcaagttcgattagaaggatagaagggcgcgaggatcggaaaagaaaaatcaaatcttttaattgcttctccttttctgtattttctattattataatcc  
atcgattcttttttttagaacttcttagtattcfaaaaaaagtattctataaaaaatcttttttcgaaactcaaaaatacaatagtaaatattcgttataatagataactaat  
tatacataagaactftaagatattttgaatagatcaaatcgaatagatagaatagtaattggaatggagacacctattctatgatggatttaactaccctctattttc  
gfccttttagtaggcttagtatttccggcaattgcaatggcttctttattctttatgtcgaaaaataaagattgtctagaaccgacggaccgaattttctaatgatttc  
cacacaggatcataatcggatctttgtagttaagtaataatattggtatgttatggctctttctacacacaaatgcaaacccgctatggatggggattatggatg  
cggatataggctacgacataaatgcatgcatatgcggaaccgggtatagcgaatttttaagtggatcaacaataacttttgaatagaagtaaatgatctaacca  
attttttacaggagtatctagttggcgaaggcgatttcagaatcaaaaaagtaaaagtcaaatcatttagcttattctcaattcaatcgaccgctgttagtatatcta  
atatgaattggcgtacgaacacatattgatagaacttcaaaagggtctcgaaaaagaggtaatttttctggcctgtattctttctaggttcactagattcttagcg  
gttggggcttccagttatctgttaagaatattatctgtacttccatctcaacaaattctttttccacagggggctgtgatgtctttctacggaatcgaggcctattc  
attagcgttactgtggtgcactattttgtgaatgtagcagtggttatgaccgattcagatagaagaaggaggtagtgatgtctttctacggaatcgaggcctattc  
aaacgtcgcgtcttctcgtattccttagcgggatccaatcaattagaattcaggttaaaaggaggtctttttcctcgtctatctttataggaatccggggccagg  
gggccattcctttagctctgactgatgagaatttttactccacgagaattgaaacaaaagctcggcaattggcttattcttgcgataccaatggaagtattttgag  
tacaattgaattttgaaatgaattgaatgaagaatggaagaagaaattgctcaacacgagggaaaaggctcctcgaattgcaattattgaaggggatt  
ttgattatttataaaggaaacaaatgaggataagaaattgctctaaattgccaagtgggatataatggcgaatattctcattttcatccgaaggacttt  
tttctatttctattccactccatctagatcaagaagaactcaatgcaatgaaattctactagatagaaaaaaggagaatagatacaaggctcaaacctgttatag  
aattttcctcaaaagaaaagaatataatagatgagcagcaataaagcggattcattaacaactcaattacagatcaaaaatgaaaaaaagaaagcattgccttc  
ttctataatctgtatttactgacttttgccttggggagctctctttcttttaacaatgtctggaactttggattaagaattggtggaataccaggcaatcccaactctc  
taactgtattcaagagaaaagagttctagaagaattcatggaattagaaacgtttttatcttggacgaatgataaaagagaaccgaatacacatgtacaaaacc  
ccctataggaaatcgcaggaaaataacaattggccaaaatagataatgagggtcattctccatcatattttgcaatttctcagacaaataaatctgttggctattc  
ggtcttttttctgggtaaaagaggaaactgtattttgaattcttgggtcaggaaattctctataacttaaatgactcagtaaaagcctttttattcttttagtactgatttttgg  
ttgatttactccaccgcgggtgggaactactaattcgttgggtctataacgatcttggatgggtcctaacgagcaattttactattttgtttgtagtttctctgatt  
ctagatacatgttgaattttgggtctttttgtttaaaccgctatctcctcgtttagtctatttattcattcaattagtgaaagcataaaactattgatctcctgatattaat  
caaaattagcatccttttcttagaagaagccttttccattttagcaaaattctttttctatttctacctgctcaaggattcatcattccagfacaactgtgcaagtag  
aatgacaacagattcgtgtatagggaactagattagcttagctacatctaatattattgtaaaaatccgggatctgtgattggacatggaataagaataacttttctt  
gggtaaaaggaacagatgactcgateatttctgtatcgtatgatatacgaataactggacatctattcaaatgataatccattttgcgacgaagggtatgaaa  
accacgagaagcaactggacgaattgtatgccaattgccatttagcgaataagcctgtggatattgaagtccccagcagctctccgatactgtattgaaag  
cagttctcgaattcttatgatgcaactgaaacaagttctgtaattggaaaaagggagggtgaattggtgctgttcttattttgccgagggtcgaattag  
cgccgccgaccgtatttctctgagttgaaagaaaagataggaaatctctttcagagttatcgtccaataaaaaaaatattcttggatagccctgttccggg  
aagaaatagtgaaatcgtcttccatttctccccgacctgctatgaagaagacgttcttctttaaataatccatataatgtggggggaaccgaggaagg  
gacagatctatcctgatgtagcaagagtaacaatacggctataatgcaacgtcaacaggtgtatgaagaaaatactgcgtaaaagaaaagggggatagaat  
atccatagtcgatgcatcggatggacccaagtattgatcttatactcccgggtccagaactcttcttctcagagggggaatgatcaagctgtatcaaccattaaca  
agtaatcccaatgtgggaggggttggcagggggatgcagaataatgcttcaggtaccattacgcgttcaagccttttcttctctcgtaccggtattttggcaca  
gtttttgttctcaaaaagaaacagttgaaaaggtcaattgtacgaatgaatttctagggtccgggttcttaccatcaagttgtaaaaagccgcaattattgg  
cgattgctagaattctctatgatccattttggaatctttttgttttagactattttgtttgagatgcttctgctgaattccttattctatctcatgcaaaacgagga  
gaatgcaaggcaaggcggagaacaataaaaggaacaaatcttttagggaggattgctgtcttctaatccttattgggcaagaagaaagcctttttgcctttt  
cttctgctgattcttctgtatcgaatataatcttttctctattcggcaagattactatttcttattttgggtctgtcttgaaccttttcttaggtcaggcgat  
gtagtgacaaaaagagggaagaaatagtcgggggcaaaattttgtgaccaatagaattgcttactgttcaatfaagttcaatttagaacttacagaat  
tgcaaaaaaacggatacttccattgaaggctgttttttttttaggctagtgtagtagtttaattaaggttttattagtttattacttaaaatfaaacatgattacaag  
agacttctccggggaataaataattggatcctcgtattgatcttcttctcctcgtcctataaaagtgaatfaattcttggcagggggtataaatacaactgatgga  
ttacttcaactaattattaacaacaaaataaacaacaaacgaataaataagaggattctgaccatcagagcaaaaggcttcttctgtatttttaacaatcaaaaa  
ggaaccgggtttaggttatggaatagatfaaaaaagtcgggtataagagtaagaattccgcgggtccttccgcttaatacagataaaaggggtaaggaccgc  
ctaagttctatttttcatgttttcaactggtccctccaattactatagatgaaccaatccagaatataaccgtaaaagaaaacacatfaaacaactcaacagc  
aataccggttacagttactatcagccaaaagggaattctccagtagtaccggcatttccctacttctccacattttatcaagttgctatgtagacaaaaaca  
gtcatgtagtataaggtatccttccaaatgggataagagaattcttactactcttcttctcctcaattgaagaagtaattggaataaaaacagcaagtag  
aaaaatgagtaataaaccagtagatagctgtacgattcaatcaacattttgttctcgggtttagttagtgcatagttctatagttggaattgtttatctgttgatga  
actgcattgctgatattgatccaagaaaaaacagtaggtacagctagctccgtgaacagccagccatcgcactgtaaaaataggataggtcgtatggtcattg  
aggcctcctaaaaagatcactaaatcagctgattgttctaaagaatcaaacggctggttataacggaattccttctggccttctgtgaaatactggttggccga  
ggactccaacacgtcataagtaaacccgtactgacaataaacacccgcaatgaatgggaaagtataatgctatgaataaccagatgaataactggt  
aataatcagcaaaaagacgttctccgtctccagacatgctgagctcccaaaattttgtacattcaaaaaaggaattgattccgtaaaagatgggatcaaccg  
taaatagaaaatfactgatattcatctgtgagattgtcaattgtaccaaggtgtattttgtagatacaaaatagatagctatccctctatggcacagcaatcctgt  
ttcgtctgtctcgaacagaattcttttcttcttcttcttctctatagggtaagctatagttattcaaggcatcaatagaaacctcaattttgagggtcctactta  
attttaccggctcggatcgaatagtagaataatcggaaatgggctcaagatctgggaaaatcaagttaatgatcaacaggttggataaagaatttaggaaag  
atattcttactgacacaatacaagagaagtagatcgaagactatccctcgaatcaaccttcccctaaagaatfaattggttagcataataataatctataaa  
atagaaaatcaatagtagaatactgtatgaagagagaaaacattttgaaagaatcaagattcgaatcaaccttgccttgggttactaaccttctgaccaactgc  
aagcgtggaacttgcagttcttaggtttccgaaatagtgtaattgaaaagaggtcctcgaatcacttgggttcgaaaaggaatfaaaaaagtaaa  
ttcagaaaagatttcttttttaggagacctcaggggctgtggaatgctttctctctcttattccataggaatacaatcaataaataagaaggaatggggaa

tatttgactgttcgctccaaaaaagaaggftaaatcctctattgaaaaagaccaaaatagaaagaacttttcaaatcaattcttttttactggggtagctgatctag  
ttcttaataattactttactcaattgacagattacacagcaaatctcttgatcggaaataggactcatgcccctctgatgaatccattttttacttctgtatctca  
ctctatctgttttttagtattatctaaaataaccgatgaattatgaattttccataacttaggtaagtgttccaacatagtagttagtaaaaaaaggaaftaacct  
ttcatgctactataactgattttcggtttctattgctgttacttaaccctagctctatttattggctgaacaagatacgtcttattgaaatgaattgaatgaataa  
ggcagaaaaaagaaaaatctcttttggatcctgtattctacgcactaattaccaattctttttctggctcattgagattcgtggataaattgactactatttaggata  
aatcgtactctttttttatcccctcgaacaatcgaatgattgaagtttctatttggaaatcgtcttagcctaattcctattacttttagcgggattattcgtactgcgta  
ttgcaatacagacgtggggatcagttggatcttggattgagtaaatttctttttgattgccctcctctctgctcggaggggtaaaattggaattgcaattgtttgta  
agttatttggccctgcttcgacataagatagatggaaatcacgctctgtaggattgaaactacacatcgggtttggagaccgcgttctaccgaactgaactaagag  
cgctttcaaaaatcaaatccttttactcctaattgtctcactgacgtatagatccacaaaftaaagttatacccgtttaaactgacctcactactgcctataaaga  
agaagaagtaaatgtaggtagcagaggattgaaacctgtgacattttgtaccacaaaacacgcgctaccaagctgcgctacatcccttttcaaaattgtgtaca  
atgctattgtacacaattcctattctgtttccacatcctaattttctgtcttttctatctatagagaatcctcgtgctatttcttcttttggctctataatcaaggatggtat  
atctctaaatccaatcctaatttcacataaaaagaaagattactattccttggtaactataggaaggattgtcttttctgttttagttcggaaattcgcctaaacaaaaga  
aatacaaatgatctgggcaataatctgatcatatacgtattccaataaggaaaggaggatttcaatcgggataaaaaacatactctctgtgacaccgctgctaa  
gtactctatggtttggggcttttagcaggttattgatagaataatcgtttattccagatgctttgctatccccttttttacttagttgctatgtaggaaatagagtt  
cttcgtgacatgataaaaaatcccacttttcaatcccttttagtatagaaaagaaagaaagaaatagattgggttgaccttagatgcatgaaaaattggta  
aatctcttttgaaaaaaagaattcaatfaaaagcagatccaagctaaagtcaggccctcagaatcagagcatagaagaaggctgggttgctactaaaatgaaag  
gattttgctcaaaatccttctaaattgacaaggattgtattcctaattattctctatttttacttaattgaaaaatttcaaaaatttttattcctaattgattttcttctc  
cttcggttcaaaatgaggaataaaagaaatagtaagaatgaagtaagtcattcaaaaaggaaaggaggttcatggccaaggggaaagatgttaagaatcag  
agttattgcaaatgtgtgagttgttgcgaaaaggggcgaatgagagtcggcagggatttctagatatagtactaaaagaatcggcaaatcaccggcaatt  
agaatgaagaattttgtctgattgtctgtaagcactacgattcattgccgaaataaagaatagagcacttctgttccgatcttcaaaagatcaaaaagaataagaact  
tctatttaattcctatttataatagagcagatagatagaatacaaaaatacaaatcaacttctgctgatttcattagatatttctatctgagggattactcctaataat  
atggaccaaaagagagactatttctctggatccaaaaftaataaaataaacaatcaattttttcaattttaaataaggaaataatcgtatacatctaaacacccctt  
cataaatcaaaacaaacttttcataaatcaagcaaacctttctgtaaatcaagcaaacctttctgaaatcaaaacacccctttcgaaccccaaaacaccccttctgtagg  
cgtcctcggattggccgggggatcgaattgattatagaacatgatttaataatcgaattatttagtgaacaaggaataatattatcagagcaataaatagattaac  
cttgaacaacaacgattaaactcttctataaaacaggctcgtattttcttcttaccattcgtactatgagaatgagaacaatttcaagccagctcaatttcaat  
aattacagctcagaccagaaaaatagacatactctccattaacacaaaagttcaattcaatcgaacttaagaactccaaccagactttaaagaacaacaat  
cggacttaagttccgattgtgatgttttattcgaaggccagactatataaaagaaatcaatttagattctgggtttgtataaagaagcaaatggggaa  
gaaaaaatgttttttatttattgcaacatgctcgtgattcctaccacttaatttattgtatcttccggagttactctccgggaattcttttaatttctctgtat  
tactttttatcccttaattgataatcttatttattgaaatcgtgtaaaagattttgatttaatacagctacttctgcaaggattttacgattaaatcaattcttctgta  
aagattgtgtattaaftactataaattatcgaatacttattgtatccgcgtgctcgtttatccgactgatccacaacgccgaaaatccctcttttgcctgactctatctc  
atgagaggaaacaacgcctcttctactctgttgagtaatcattcattaaagcttaaatgagccctctaaagttgaggcaaatgaacgcatttttcccgtcgtctccg  
agctatatactccgcggaaactctggtcattgaatcaatcaacttattgaataactaatgatttctcttcttttagccatccttttccattaaatacaaaaacgaattattc  
ccatataaaaaatagttccaatggcttttctactataaccttccaaccacaatttcttctactcctcagttatttgcacgatactaaaaaatagtggttccat  
cgtttctatggttcccttttaaacggcggagccctctctataaccggagcccttcttctcaattcaatcaaaagggtattggaactgtatagttcacttcttggccttacct  
atccattatagagtaaatagctcttttcacaataagagttatccatacagtgacggcatttaattatgaaagttgggtaagtagctgacctcttagtccgttttttaagata  
aaggagcataagccttattcttttactatttctccgcttaataagaaagcgtttgctaccaatgggggaaatgcttcttcaatcagatgattgattgacca  
aaggaaaccagaattccatataaccgtagaatctagatagagaagctctatcttattcattggtaccgatcagatacctaaaattgcttattgtttgaacctat  
gatccgaacgagtcgcacatacaccctagcagatgttctcagcgtgaggacatccctaaagcggccgattttctagcattcgtattgctgcttgcgtttctaa  
taagttgttaaccggtgcatgctgtatgatatagaaaaatgattggttagatcgtcttaacctgaatgattgatcattgaaatfcttaaaattgcataaaa  
cccgaatttagggtaaaataattcaagaatctggccactaccaatccttaaacatttctgaaaccacactggatcagatcgcagtcgctgcaagcatttcat  
aaccttctgacatctcgcgaactttgtgaactcttccacttctagtaaaaaatctggtgtcttccgataataagcactagcaggttggtaagcataatcctcgc  
gtgggggaatgctatacgttgggttctcctccaagcagaatgaaggacccatggacgcggctattccgagcattattgtatataatctggtgtcaccgtttg  
catcgtatacaaaaatgccattcctgagattaaccaccggcggggagttataacaacaaaaaatatcgttaattccatcttatactgagatataccatgagacctg  
taatatgattcgtgacctgcaacgaatccttgcactaaaaaagtgcttcttctgatacataaactgtataagtaacccaagtcgcttctcatctccgggaatcc  
ggtaaggtagttttggaacccaatgggcataattagattatattatataaatttaagtaagaacacactttaaataaggaaacgtaagaatggaagagaagaaga  
atccgcagtttattgttttacttttttctattctatataaactatagattctattaafactgtagattgaaataacatagattgaaagattatacatataagtaggataag  
acagattgaaataagaaaaaagaatgggtgattcgaatacaaaaagagatagggatctattcttcttttcaaaataagcaagctgccattgcatattgg  
cactatcagatagaaatagatcgtcttcttcttctacgaacagaattggcttctatttttaattggaatgaaataaattcactgcttctgacacagaatccctag  
aagggttaggtacataagatagatagcttccaatgcgataaaataaagtgacatcgtgctattttcttggctaaaggggtatttccatgggttgccttggatc  
gtgtcactatgctgattgaatgacgggctgattcgttctggtcatalaatagcacacagctctgatttctggttgggctggctcaggtcttatacgaattagcgg  
tttgatccctctgatcctgttctgacccaatgtggagacaaggtatgttcgctattccttcatgactggttaggaataaccaatcgtgggggtggtgagatttccag  
gaggaactgaacgaatccgggtatttggagttatgaagcgtggcaggggcgcatattgttttctggcttgtttcttggcagctatctggcattgggtatattgg  
gacctgaaatattctgtgatgagcggacgggaaaaccttcttggatttcccaagatcttggaaattcatttttctgcaagggtggtgcttggcttggcgc  
ttatgtaacgggtttgatgtcctgggatatgggtgctgatccttattgactaactgaaagatacaagctgtaaatccggcgtgggtgcagaaggtttgatcct  
tttggcgggggaatagcttctcatattgtctcgggtacattgggcatattagcgggctattcattcttagtctccacctcaactgctatacaaaagatta

cgfatgggcaatattgaaactgtactttccagtagfatcgtgctgttttttgcagccttcgtagtgcggaaactatggtatgggtcagcaactacccaattgaatt  
gtttggcctactcgtatcagtgaggatcgggatactttcagcaagaatatatcgaagagttatgtaggggttagccgaaaatcagttatcagaagcgttgctc  
aaatcccgaaaaattagcctttatgattatattgtaataatccggcaaaagggggattatcagagcaggtcaatggacaatgggatggaatgctgttgatg  
gttaggacatcctatctttagagataaagaagggcgcaactttttgtacgccgtatgctactttttgaaacattccggtgttttgtagatgaaggggaattg  
agagcggagcttcttttagaagcagaatccaaatatagtgtgaacaagtaggcgtaacgggtggagtctatggtggcgaactaatggagtaagtattctgat  
cctgctactgtaaaaaatagcgaagcgttcccaattaggggaaattttgaaatagatcgggctactttgaaatcagatggtgttttcgacagcgtccaaggggtg  
gttacttttggcatgctacctttgcttctctttttggacacatttggcatggggctagaaccttgtccgagatgttttgcgtgattgatccagacttggatgct  
caagtggaaatttggaaactcacaagaagcggagatccaactacgaggagacagccagctgagggccgattgcttgggtatctttcacctctctttttgattgacat  
gggaaacatcctccatcctttgactctttttctttttatagggaaatgatcccaaatgacaaatgaataggtgtggaaagtataattgtaataaacacacgatc  
aatctatggaagcattggtttatagtttcttacttttagtttggacttttagggataatttttctgctactcttccgagaaccacctaaggttccgactaaaaagtgaaataat  
taattgaagtaagaagtcctccagatggggagacttctactcaattagtcctcgttcttccgaatggatcttcaattgtgagagggttcccaaacgcggtatata  
aggcataccagtaaaagcctacaagtaaacagatagggagatggcactaaagtgtgtttccattttatagaaattcaagattacaatggatctacgaaaagatc  
tgtattacaactacaacggaatgatacaaaagcacaacaatcaaaatggaattatggctacacaaccgttgaagatagtttagacctggaccaagacaaa  
ctcgcgtaggaattattgaaacccttgaatcggaaatgggaaagtagctccgggttgggggactactcctttatgggggtcgaatggccttattcgcggtatc  
ctatctatttttagaaattataattctccgtttactggacggaattttagaattagtttactaacaagaaactacgaagtcatagttttccatcaaaaagacct  
tctactttaagctctacatttctagacattctgtagtgcaccgtggaaatttttgggttctgtagtctggaatagtggtgacttggtagaatttgccttattgataat  
acatagaaagcactgttatctatcaagatgattcaattctcggatatttttctagtagtctggaacacgaaatagatagagtgatcaagaaaaaaatgaa  
actatgattcatattaactattcagacctcgaaccagactgaaaaaattcaagtagtcttaataaaaaataaaaaaagaaatttctcctccattttgttggccaaa  
aaacaacttttttctcctgatttctcagctcattaccgattcaataatgatcaaacgggttcttattcgaagaaccttgcctttttagcttggactcaatcat  
cgtggctctagtagaactcaaggttttaattgaaactgattcataggtatcgaacaagataaatttaccgaaaaactactccaattttgttttatttattatagtaaaac  
aagagtaactctgactacgcacaaaaaaagaatcacaatgggaaagagaaaaatcaagaggcctctaatgatcaacatttgggaaagaaagatagacgag  
ccaacttgagatttttggcattatcacaagaagaatctggatttttctattcatatctcaagcacaatcgaccaaccagtgctgatgaagtttgaacct  
tttttaataatcctgtaaaattgtgtgtttctgtttgagccgtacgagatgaattctcatatcaggttctcggagggggttccggttagttacctatctcaataagta  
tatgattgtttgaggaacgtctgagaltcaggcaattgcagatgataactagtaaatgttctcctcatgcaacatatttattgtttagggggaattacactact  
gttttctagtaaggtgctaccgttttctgacttttactatcgcccaaccgttacagaggcttttctcgggtcaatacaatgaccgagggcaactttgttgg  
ttaatccgatcagttcatcgtggtcagcaagatgatggttctaatgatcctgcacgtattctgtgtatctcacaggtgggttaaaaaacccgcgaaataact  
gggtcactggtgtgttttagctgtattaactgcatcgtttggtgaactggttattcttaccctgggacaaattggtattggcagtcaaaattgtacaggtgtcct  
gacgcgattccgtaaataggatccttttagtggaatttaccgtggaagtctagtggtgcaatccactttgactcgtttttagtttacatcctttgacttctctg  
cttactcctgatttattgtaatgcactttctaatgatacgaagcaaggtatttctggcccttataaggaagcactctcatagagagttcaattctcatatcatatc  
ggtaggttgtgtatttctgctacaacatgggttattctaaaataagacatgctatttagatacttcttcaactccgaactattgtgatacaataatacaaatagtg  
aagtaattttacgaaagaaagaaagcgggattatgggagtgctgacttgaattattgtttggccatcgagatagagagtgatctgccacattgaaattcacgac  
caaggtgtctccatccaatcaacacgtaagtcccctgctctagtaaggataggctgttccacttggaggaaatatttctatgatcatcctcaacctatcctcatg  
aagaggctccgtaagatcccatagtagaaggaatggaataagtcattgacatgataaattcttatttattacacttacttttattatagatgaaatgattcatttct  
tgcacgattgcgactcgaatactatcggagtaaaagaaggatcaaggaagacgtagcctaacttttgaattttattatgtaacaagttaaactcttgggtgac  
gtaagaacttgcataattgggggggataataccaactaatcaagagacgcgagacaatccacaagcaattgatcatgatcaaatgttaagcccacttggatatt  
gagcattaccataagagtaggattctttcaatgaatagtttaggtgcaactcggaaaatagaatctgataaaacttttctacttagaccattgagccattatata  
ccttattctattatgattcttctacgttttatttcttcttcttctcgtcgtcggccggtatgataaaatctcatgtccgggtcctttgggggctggatctaaagaattcaccta  
tcccaatacaaaagaacctgactaaacgatcctgtattaagacaaaattagctaaaggatgggacataattattacggggaaccgcgtgcccacacgatctt  
ttataattttccagtagtaattctaggtactatgcatgtaatgtaggttagcgttctcgtcgtcgtcaatgattgtgaaccggcggatccgttgaactcctctgga  
aatattaccgagtggtacttcttccgtgtttcaatactccgtacagtaactaataagttattggcgttcttcaatggttctgtccgacggccttattgacagta  
ccattgaaaaactccttaacttttaggttcttttagggatttttcaagttgattcattcaactgtgaagtaccgtgcataggtatctaggaatagttactccaagtgaactt  
ccctagatacctataactattttattatgatccatttccgcaaaatataagatttcccaaaatgcaaaaattgttttcttttcttttatttcaactcgaaaaagaagag  
gaaaaaattgcaatggattaaaactagaacttattcttagtaaatcattgggagatgcttcttagaggttccatctgttttccatctgcatagaaaactgcaa  
ttctcatcagatcttctccgtcttactcaaaaggtccaatagttatgataattgccccttttagacaattatagttctagaagcaggttcaattgatcaataaaaaata  
caattcaatggaattctttttgttttcttagattgtaattctttttgaaagcctaaaaggggggaaagtaaacctgttttatttcttggaaacgagttacccttctcctccg  
tgtgaagaaaaggaaataaaatcaatcaattacgagaagcctataaaagcgttcttaggggtaaaactcattggtccatatttctagaaaaagatctcatat  
ttgcatttccattcccaagcaaaaactataaattcacatttgaacagcagatgatacagatctataggataactccatctgagttcttctgacttccgtgtg  
atatccgcgatctcttctgatccgtaactcaatcggaaatcctgggttctgcaagttagctatagttgtgccgtatcaacgatttctcggaaagcggtaagataa  
tatcttggcagttatgatctaggacctttgacgcaaatgatcgggttcaactccatagagatttctcaatacaatttctcaaaatttagtaaaattctgttaccga  
ttctcaafacctgctattgtagaattctgtcggcagcgtcccaattttgcatgtgtgatacatgtccttctgtttctcaagtaagctcttccgaaagcaatacaca  
cggtatccctgtgaccttttaagcggggacagaatgaaacgaccataataagacgcttactatctacttattcaacacacttccactgtatgtttgagtgat  
cctgctactcctctcgaaccatataactagtagtattattttgatcattgaatcgtttatttcttgaaggggttatttctttacagacgtcttttttaggaggtcga  
ccattatcggcagatggtttacatcgcgtatacaactaactgtacaccacttttagcaatggctgtaatcggcactcttccactaccagcaccctttaccataac  
ttctgctgttgcacaaccactgtacgaaatagcatctacagctgttctttagaccagcatagggtgatcctttttagcttttgaatccacaagttaccgcggaggacc  
agaaaaccaccgacttgcggatctgaacagttataatagattgtgaaactagctgaacatgaataactcctttgttattctacgtcacttccgtaaaactaaa



gatttctaggttcgctgtaaacctaattggtfacctccaattacgtaaatcaatagtcaaacccgactcaaaaggtagggcattfcccattgatataggaactttgtacca  
gaaacaatagtatctccaattatagcccctctgggatgtaaatatatacccttcaccatcccatagtgatgagacaatgtacgattfctgattagggctgtattcta  
tggttacgattctaccagatgctttttgattccctgaaaatcgattttacgggtatagccttatgacctccccctctatgcttgcggtaagattctctggaattac  
gacctttaccacaacgggctccatggatcaaaattattctggttggtfctactgacctatctatggtfccccctgctgtgctcgggataggtgtttgtataaatgt  
ttcggcgtattatagattctctttagttttttctctatctagaagtggaatagaaatcccgggtgaaaggtaatgatcagctgtgtatgattgctctagaa  
tagggcccattctctacccctcgggtagctgatgcttaccagctactaccttaacaccaaaagaggtcgacccaatgctttattctgtcttagtgaatccc  
attcgacattaaagtattgattcttcccaataaacgaagactttttctgtaatactgctgattfgattccatccataaacgactttcccctctatgctctgagtcca  
gtatcgataagaattcgaggctcttattgttcttattggtatggtatgaaatataaccataaccattcgttattggtgatggatgagattccatggatagagaccagtcca  
atagacttatggaacgtfcccggctcgcgtgcatccagcagggaattgaacccgcaatttaccfaatgatggtgggcctfaccattcagccatggatgctaacag  
ggatcatcgatcatgtaaaataaccaattttcatatagaaagacatcatagaaaaatgaaatcgaaatattcgatgagcaaaatattcgagatgactatgaaaa  
cacctctcgatcctcgaattgaaagagagattgagaggatccagaatcctaattctcgcctatttggaaftggtaccattctattgagtctgactcatagtgtacatt  
ctcttttagcaaaatgactggtattcaaaggattgaaacaccgggatccggttacttatgataccattgtacattgataacaaggatctaatgattatgagttaat  
agatctcttttagcagaagaacgatattctgtctatcattatcccaaacctctgatggggtaatcgttttaccattcagggaaaaatcctttcgtccgctt  
agcccctatcgggtatttttagtgatagggtctataggaactggacgacccatttgggtcaaacctaatgaaatctcatttcccttcatgaaaggatcagggccttatt  
tccacaagaaaagAACgaaagcaccctttcattttcatactgggggttttactggaaagacaatgtccatactaaaggattcgggtccataaccagagtcc  
cagtgactagatcttgtagcacttagcaacgagcccctatgaatgacatagaaatggtcgaggaaatcgaatgaatcattgagtgaagaaaggagcaaaagaa  
tgaaaaagacgagactctactgcttccctctgtggttccctcgggttctgtttttttcttactgggctgcttcttccattgcttctcatctgcaactcgcgattttcgcg  
gagaaacccaatcgaattggggaagatcattggggctggcatagagtttctccttccacattgctgattgggatcgtttgctgattctccctctgacttattgggctg  
aataaaacccctgtcgaagccctttatgataagcttcccggatctggggaagtttctccttccacagggtattgggatcgtttgctgattccttctgacttattgggctg  
gcgtcAAAGgatacaaacagggttcgcaacaAAAaggggAattcgtatgcttcttctgtcgcgtAAAAaaaggctttctacgcgagagcaatagagggttgg  
gatacatctatcttctgagcaaccttcttggattcttaagaccaccttgcagtagataccgtctgcttgggttcttattatattctcctcaggggttttttaggat  
cgttcaggctatatttagctattttggcttactgtctctttctcagggaagtgttgaaggacctcagaagatagaggagagccaggcgcgagattcccgaata  
ctttctaggggaatgctcattgaatcgcgattctccgtattatgccttgaagaggactcgaacctccagctctttagcacgagattttgagtctcgcgtctaccatt  
caccatcaaggctctgaaagtgaatcatttccatgaatagatactatctaatgtgatacttgaagtgatcgtattccatgaatagatactatctaatgtgat  
atggaatatafgacaagggtggagtctggagtattcgtatcgtcggctatagaccctgagtcagacatcaatagcttcgatttgcattatccgttaggacaccctat  
atgatcaaaatcaaaaagatgacaatccaattctcgtattcaatagaagccaaagggtgcatatggtaccaaataaggataggatagatagtcaaaagcag  
gtctgtattcacctattcttaactcaatagaatgaaggacgtggggatttctatgtaacagagatcctatttccataggtcgaatgaccttctcataataaga  
atgtgcacggctggtccggatggaatgaactataatctgatgcgagtcgattccatgattataagttcattaccctagcggccattccctttttggcggaacag  
atctactaattcttttattccagttagtaagagggtcttgaactaagaatagacctagcagctaaaggggatcctgagcaattgcaagaatggggcttattgata  
ttcctggatagtagatgctacacatacagctatactcaattcgtggaattggtgatctaaaggggatctctataattcgcacataagggttattctgttct  
gtccagtcatttaaaactgactatttttagataatagtagatagaagaacgctcgtgaaggagctcattgaaaccaagaaatagagccctgcttccattccacca  
gaatagatagagtttccgaagaacctgctagtggaggaaggcctcctagggataagagacatagggcctaaagagagccaaaaaggatcttctgtgataat  
cctgcataatcctgaattgttccagtccgttagcagcaataataacaatgcaagcaaaagtcttagattcatggagatagaaaagcatataagttatcatgct  
tgcataatccattgtggtctcaacaattattccaataatfataccgattggccctatggagcaaatgcaagcagatcttctgcttggatgaatgcaagga  
gattcccataatcatgctaagaatgctaggattccagaagaagatgccattctgtgatgagaataaaaaggaaatctcgcggtgcgtggaagctgagc  
cagcaacttccaggaacagaaagaaagcaacgactggagtgggggagtcagagtcgaaaagaggattccctccttctctcctcatgcaaaacctgtcatga  
gacttctcctcgcagggctccttaagtataaaagaaagaactgtcttctttttttagttacctctctgctgatgataagaccgaatccattcttttgaatc  
gatttcgaaaaagaactactaatcttaacttttggagaaactctcactcagtggtgtggaatgactgacttttcaactcttccactgtgtaggaagcag  
aaagggtgagaatagaacctctgatttgatcgttccaatagccatgagatgatcctttaggtgaccttttgcacggatgctctattacactgtagtctctg  
aaggatgagaacccactatgtagctactcgtgataattcaagcattgtatagctcatttagccgactttgttaggaactaccgtaataacgagcttgcaaaatgga  
tctgttatcataaagagattcgtttctgacctgcttccctaaattgtatttgaacaaaagatcacaataaacctttggtaaaagtctgtctgtctggagtggg  
atagcatttcttctgcatatctatggagtgtgcaaaacccaacacctcagagatagatatagaggtaggaattgtcgaacgaaccacactcttcgtgactgca  
ggagtccattgatgaaaaggggctggggaagcttgaacccaagctcctacagtgtgatataagcgaattgaaattcctgggagttatataatggtgattgata  
agaccgttcaaatcttgaagctcgtatccccccagatgaacatataagcaagaaaccatgaaacgaatagaagagcttccccaccatgagtaaat  
attctatagtagcctcattagaccgtagatctctctgtatattcagacaataggtaggaacataaaactgaaacattctggactcaaaagatagttatataactgtag  
caccacataaaaaactccccctagatgctgttaatacgaataacagaactctgttatagccatttctgtacattcaatgtagctctacggatagaggaaatacaaaa  
gttgaacataaaaaataagaattgaagatttctgttgaattgttggaaattcccgaaaagctaatataggttcttctctccatcggaaacataggccggtta  
tgcttattactaaactgttgaagagatgaaatagaaccaaggctctatcttttgatcagagggtttaaactgatcatcagaagaagaattagggcaaaataggatacatt  
ctgggaaatgaaactcctggaagagaagcaaatgaaacgcttccataaaatctcgtagaatcagagatgaagttttcattctgtagatcccagatcatgaatta  
gtaactgcatcaatctccgaaaagctccgattgttccgatttttgaatgggataattacggaatccccatgaataggatcaaaccttattcctatgctattccataagatt  
ccttcttattcttaagcaagccccgagaggcttaggtgatcatttctgttctcttcttcttcttcttcttcttcttcttcttcttcttcttcttcttcttcttctt  
attctttccgatcagatgtatgattccatgtctctacatactgattctgttctattcgttgaacgaaatgtcgaagagcctatttgccctgctcattctatgagtcct  
ccttttgcgtatggcaccaccacccttgcagcatctactaattcggaaacttaattgaaagccataattcgaccggcacttgggtattgcttctaataaccaac  
gaatggcaagtgcttctctgttttagatcctattcaatcggaaacttccgctcgtcttcttattcagcttcttcttcttcttcttcttcttcttcttcttcttct  
acgtaaaaccaatagtgtatttctcttcttgttgaactttttcagggctcgatagagaatttataagccaatgatttttccgcttccataatagcgttaaccacca  
tgttaactaatcattacgaaaattggtacggattttcagtttcttctcagtagctcgcagtgatcagagcgtaaaagaggttcaagaatccggtttcttcttataa



gggctaaaaacgaactacttatttttggcttttggacccatattgtagggggaatcgcgaaagatagaaagatcctccaagccgtacatacaactttcatcgaa  
tacggctttccacagaattctatagggatctatgagatcgatgtaatggaatcacttactcacttaaaattgagatccgtttccctctttcccgtaggacggaatc  
ctgtattttccataccataccatcaagctcttaggtttccgaaatagtgtaatgaaaaaagaagtcttcgaatcattgctatttgactcggacctgttctgaaaaagtcg  
aggtatttcgaattgtttgtgacacgggacaaaagtaagggaaaaccctgaaagaattccatattgaccttgacatataagagttccgaatcgaatcctttagaag  
aagatctttgtctcatggtagcctgctccagctcccttacgaaacttctgtattgggttagccatacacttcacatgtttctagcattcacatgacatcaaatgata  
caagcttggataaagatcacaacgcactagaacgcccctgttgacgattcttactgcgacagcatctaggcctctcgaataatgcgataatcaccaccgggtaa  
atcctaacccttccctcttactaatactacagaatgttctgtaaatatgccaataccaggtatataagcagtgatttcaaatccagaggttaatcgtactctggcaa  
ctttacgtaagcgagagttgggtttttgggggtgatagtgaaaaagtcgacagataagtcacccctctgtcctctacagaaccgtacatgagatfttcacctcaca  
ggctcctcgttcaattcttcgaaaggatcctttcctcgttcgagagctccgcccttctccactccgtcccgaagactaactaagaccaattgagtcacgtttcatgt  
tctaattgaacactttccattatgataaaggagaagattgttctttaccaaacatagcggatcaaatcagctctataataagaagaatctttctggatcaatccc  
cttggccctcattcttggagaatcagaaggatcctttcgaagttccatttctcatttggaaactcggctcttctatcttcgactattttttttgtttattcttatttattcatt  
tcgattttccctcttctctatccctatcctcttaggtacagcgtttgcatcaatagagaacctttcctctgtatgaatctatatttccattccaatttctcccgaactcc  
caagaaaaatcccgaattggatcacaattgacgggtaatgtgagcttatccatgcgggttaggcacttcaaataggaatccatttcaactggcttctgtctttgg  
tgagtcgtccgagatccttcgatgacctatgtgtgtaagggatctatagatccgatcattgataagaccggcggtagcaatagaacggggaaagtatac  
agaaaaagacagttctttcaattcgaattatctatattagttcgtttctatctatataatgattagttagtagtactattctattagttagcgtatccc  
gctctgtgagttcttctcgtgatgaactgtcggcaccagctcccttctctgtggaccgaggaagggggcctcagcaggaagagattgaccatgag  
agaagcacagaggtcaacccttcaaatatggaacatggaattctgcaatgcaacgtatgttggctcctatcagatccgaatgaatcagctttctacagaggtca  
atcttgcattataggcaagaggtatgcaagttcgaattctgtctcgttaggacatggtttctactatgaattcataaatgaaaatgaagtagtaattggagg  
gctaccattatccttttctgtatgtgttcctaagagaaggaatttgcatttctgttccgaggtctcaaaaaagggcgtggaacacagatagaactctgaaatggaaa  
tgaaaagaaatgtagccccagttcctcggaaatgtaagatcttggcgaagaagaaggggcgaccatatacttctgactgttctgtctccctcttttttaag  
aataccgagtcgggttctctaccagatcgaatgaacatgctgcaacaagatcttctcaggaacctgctcatttagatcgggaaatcgtacagattttatg  
aaacctgtgctatggctcgaatccatgtaaacctatttctgatagaccggtgacaatgaatccaattttccattattgactatccataatagttggaagaa  
agccccgaggaaggggtgacctgagtttctgccccttgccttaggatcgttaattcttctcagggggacggggaagggatataactcagcggtagagtgta  
ccttgacgtggtggaagtcacagttcagcctgattatccctaaaccaatgtgagtttttctatttgaacttccccccgacacgatcaacgggaatggataag  
aggcttgggattgacgtgatagggtgaggttgctatactgctggtggcgaactccagcctaataatcgaagcgcagatgatacaagttatccttggaaagaaag  
acaattccgaatccgcttctacgaataaggaagctataagtaagcaactatgaatctcatgagagttcgaatcctggctcagatgaacgctggcggcatgct  
aacacatgcaagtcgaacgggaagtggtttccagtgccgaacgggtgagtaacgcgtaagaacctgcccctgggaggggaacaacaactggaaacggtgc  
taatacccgtaggctgagagcaaaagagaaatccgccaagggaggggctcgcgctctgattagctagttggtgaggaatagttaccagggcatgatcag  
tagctgtccgagaggtatgacccacactgggactgagacacggcccagactcctacgggagggcagcagtggggaatfttccgaatggcgaaagcctga  
cggagcaatgcccgtggaggtggaagcccacgggctgcaactcttttctcggagaagaacaatgacggatctgaggaataagcagcggtaactctgtg  
ccagcagcccggtaagacagaggatcaagcgttatccggaatgattggcgtaaaagcgtctgtaggtggctttcaagtcgccgtaaatcccagggctcaa  
ccctggacagcgggtggaactaccaagctggagtaggtagggcagagggaafttccggtggagcgggtgaatgcattgagatcggaaagaacaccaacg  
ggaaagcactctgctggccgacactgacactgagagacgaaagctagggagcaaatgggattagagaccccagtagtcttagccgtaaacgatggact  
aggctctgtgactcagccgtgactgctgtagtaaacgcgtaagatcccgctgggagtagcttgcgaagaatgaaactcaaaagaaatgacggggggc  
cgcaaacgggtgagcatgtggttaattcagatcaaaagcgaagaacctaccagggttgcacatgccgcaatccttgaagagagggggtgccctcgggga  
acggcagacacaggtggtgcatgctgctcagctgctcgtgtaaggtgttgggtaagctcgaacagcgcgaacctcgtgttattgttccactatgatttgg  
aacctgaacagaccgggtgtaagcggaggaagagagatgagccaagtcacatgcccttatccctggcgacacagctgctacaatggcggg  
gacaaaagggtcgcgatctcgcgaggtgagctaaccaaaaaccgtcctcagttcaggtgcagctgcaactgcctgcatgaagcaggaatcgtatgaat  
cgccggtcagccatagcgggtgaaatcgttccggcctgtacacaccgccgtcactatagagctggccatgttgaagtcattacccttaaccgtaagg  
aggggatgctaaaggctaggtcgcactggagtgagtcgtaacaaggtagccgactggaaggtgcggctgacacctcctttcagggagagctaatgct  
tatcttattgggtattttgtttgacactgctcaccgcaaaaagaagcagctacgtcagctaaacttggatggaagcttcttctgtttaggggtgaagtaaga  
ccaagctatgacgttattatcctaggctggaacaaatagttgatagtatagatccccttttggactcctccatgcccctcccccgtgtgtgtggcggcatggg  
atgtcaaaagaaagggatggagttttctcgttttggcgtagcagccctccaaagggaagggcgcgacggctattagctcagttgtagagcgcgccct  
gataatgctcgttggcctggcctgtgagggctctcagccatgtagatgtcaatgtgctatcagcgcctgaccggaatggtgatcatcaagcacaatta  
gcatgctgactcctcgtttgaaatcggagtttgaaccaaaaacttctcctcaggagatagatggggcattcaggtgagatccatgtagatcaacttctc  
tactcgtgggatccggcggtccgggggggactacggctcctctctcagaaatccatacatcccttatcagtgtaggagactatctcagcagcaggg  
ttgaggtcgtcctcaatggaaaatggagcactaacaacgcacttccacagaccaagaactacgagatcacccttcttctgggtgacggagggatcgtacc  
attcagcctttttctattcttccggcggtctggagaaagcagcaatcaataggactccctaatctcctcctcctgaaggaagaactgaaattctttcttcc  
cgcagggaccaggggttgatctagccataagaggaatgctgtgataataagccacttctgtctcactcctaagtcactacgagcgcctcctgatcagtg  
caatgggatgtgctattatctctctgactgaaatgggagcagagcaggttgaaaaaggtatctagagtgcttaggggtggccagggggtcttctaacgc  
cttcttttctgccatcggagttatttccaaaggactgcatgtaagggggagaaggggaagcacttgaagagcgcagtaaacggagaggtgtatg  
ctcgttccggaaggtatgaatcgtcccgaagaggtctattgattctctcccaattggttggatcgtaggggcgtatattactcagggcgaggtctctgttca  
agtccagatggcccagctgcgccagggaaaagaatagaagaactctgacttctcactcactccacttggctcgggggatagctcagttgtagagct  
ccgctctgcaattggctgttgcgattacgggttggctgtaatttccaggcggaatggtatcttctacctgaaccgggtgctcacttttcaagtaatgggg  
aagaggactgaaacatgccactgaaagacttactgagacaaaaagatgggctgcaaaaaggtagaggagtaggagggcagttggtcagatctagatgga  
tcgtacatgacgatagttggagtcggcgctcctcaggttccctcactctggatccctggggaagaggatcaagttggcccttgcgaatagctttagtactac

tccctcaaccctttagcgaatgtggcaaaaggaaagaaatccatggaccgacccattatccacccgtaggaactacgagatcaccacaaggacgcctt  
cgccgtccagggtgcaccgaccgacctagaccctgttcaataagtggaacacattagccgtccgctcctgggtggcagtaagggtcggagaaggcaatca  
ctcgttctaaaaccgacattcttaagtttaagatcaaaagatcgggggaaaaaggggagagctccccgttctgttctctgtagctgattccccgaaccaca  
agaatccttagaatggattccaactcagcacctttgtttgagattttgagaaggtgctctttggagagcacagtacgatgaaagtgtgaagctgtgtcggggg  
gagttattgtctatcgttggcctctatggtagaaccgtcggggaggcctgagagcgggtgtttaccctgtggcggatgtagcgggtcagctccctatccag  
cccgtaacttagcggatactatgatagcaccgaatfttgcaattcggcagttcgtatgatattcgcattcatggacgttgataagatcctccatttagtagcactt  
aggatggcatagcctaacgttaatggcaggttcaaaagagaaaggccttgcggtggataccatgtagccagagacgaggaaaggcgtagcaagcgcacgaa  
atgcttcggggaggtgaaaaaagcatagatccggagattcccaaatagggtcaacctttgaaactgcctgctgaatccatgagcagcaagagacaacctggcga  
ctgaaacatcttagtagccagagaaagaaagcaaaagcgttcccgtagtagcggcgagcgaatgggagcagcctaaaccgtgaaaacgggggttgggga  
gagcaatacaagcgttgcctgtagcgaagcgggtgagtgccgaccctagatggctaaagtccagtagccgaaagcatcactagcttacgcttgaccggag  
tagcatggggcagctggaatcccgtgtgaatcagcaaggaccaccttgaagcctaataactcctgggtgaccgatagcgaagttagtaccctgagggaaagggtg  
aaaagaacccccagttggtagtgaatagaacgtgaacctgtgagctcccaagcagtgagggggaaagtgtatctgaccgctgcctgttgaagaatga  
gcccggcactcatagggcagtggtggttaagggaacggaaaccaccggagccgtagcgaagcagtgcttcatagggcgttactgctttagaccgaa  
cctgggtgatctatccatgaccaggatgaagcctggatgaaactaagcagaggtccgaaccgactgatgttgaagaatcagcggatgagttgtggttaggggta  
atgccactgaaccagagctagctgttctcccgaatgctgtgagcgcagcagctgactggacatctaggggtaaaagcactgttccgtgctggctgcgcg  
agcggtagcaaatcagggcaaacctgaactactgatatgacccaaaaataacaggggtcaaggctggccagtgagacgatgggggataagctcatcgtcag  
agggaaacagcccgatcaccagctaaaggcccctaaatgaccgctcagtgataaaaggaggtgggggtcgaagacagccagggaggttccctagaaagcagcc  
accctttaaagagctgtaatagtcactgacgagcgccttgcctgagatgaacggggcctaaagcagctgcccgaagctgtgggatgcaaaatgcatcggta  
ggggagcgttcccttagagagaaagcaaccgcgaaagcgggggtcagcgaagcggaaagcgaagaatgctggcttgaagcaaaacattggtgagaatcca  
atgcccgaaaacccaaggttctcccgcaaggttctccacggagggtgagtcagggcctaaagatcagccgaaagcgtagtcgatggacaacaggtcaata  
ttctgtactacccttgtgtacggagggacggaggaggttaggttagcgaagatggttaggtttaggacacaaggtgaccctgcttttcagggtaaaga  
agggttagagaaaatgcctgagccgaggtccgagtagcaaacgctgacgctgaagtaggccccgtgactagccattgcttccacagggctcatacc  
aggcgtacggcgtgaagtatgaacctatccatactcccaggaagcctgaacgacctcaacaaagggtacctgtaccgaaaccgacacaggtgggt  
aggtagagaatacttagggcgcgagacaactctctaaagaaactggcaaaatagccccgtaactcgggagaaggggtgccccctcgaaaagggggtc  
cagtgaccaggccccggcactgtttacaaaaacacaggtctccgcaaaagcgtaaagaccatgtatggggctgacgctcccagtgccggaaggtcaagg  
aagttggtgaactgatgacagggaaagccggcagcgaagccccgtgaacggcggcctaataacggctctaaaggtagcgaattcctgtcgggtaagtt  
ccgaccgcacgaaagcgtaacgatctggcactgtctcgagagagactcggtaaatagacatgctgtgaaatgcggactactgcacctggacagaaa  
gacctatgaagcttactgttccctgggattgctttggccttctcgcagcttaggtggaaggcgaagaaggccccctccggggggccgagccatcag  
tgatataccactctggaagagctcggatttaaccttgtcagaccgcgggccaagggacagctcaggttagacagtttctatggggcgtaggcctcccaaaa  
ggtaacggagcgtgcaaaagtttctcgggacagcggacattgctcctgagtgcaaaagcagaaggagcttactgcaagactaccctgtagcagag  
acgaaagtcggccttagatccgacgggtgcccagtggaaggccgtcgtcaacggataaaagtacttagggataaacaggtgatctcccaagagtcac  
atcagcgggaaggttggcaccctgatgctggcttccaccctggagctgtaggtgttccaagggttgggctgtcccaatgagcggtagctgagctgggt  
tcgaagctctgtagacagttcgtccatccggttgggcttagagcattgagaggaccttccctagtagagaggaccgggaaggacgacctctggtgt  
accagttatctgctacggtaaacgctggtagccaagtgcggagaggataactcgtgaaagcatataagtagtaagccccacccaagatgagtgctctcctc  
cgacttccctagagcctccgtagcagaccgagacagcagcgggttctccaccataggggatggagcgacagaagcatgaaatagataaggttagcgg  
cgagacgagccgtttaaataaggtgtcaagtggaagtgcagtgatgatgagcgtgagcctcaaacgaaacgacattgaaactgttctacacgacctgatca  
aatcgtatcagcacttccatctatcttactgttcaacttctgatgaaaagatgaaaaaccccccaaaagccttccctctctgtatagatagagggga  
gggcagagggccttgggtccttccagcaagaattgggcttcaactactgccaatatttctctatgcttctcgttcatggttcgatattctgtgtcctagg  
cgtagaggaaacaccaatccatcccgaatttgggtggttaactactgctgggtgacgatactgtaggggaggtcctgcccgaataatgctgatccagaatga  
taaaaagcttaaacctcttatttacttctactatttgaaatagcaaaagatccaaatccaaatgcaaaaggtcgttattcaaaacctcaatcatcatccctc  
tctccacttccacacctcgaacgactgttctatagagaaaggggccttccatcttcaaccgaaatgaaatgctgaggagagggttcccttgggg  
ggtacccccgggaagagatccagtgagagcgggtggcctgtagctcagaggttagagcacgtggtctacgaaccaggtgtcgggggtcgaatccctcct  
cgcccacgcttccaaagggggaaggcccttacttccccctgagggtaggaaaacctgacgggataagcggacgtaaaagctattgaaacttgggtatgcttct  
ctttgtcgaagtgaatcgtagaacagaatgtgatacgtagataaaatgcaatagaacaaaggtatgcaacgggttaccctactcctaagggtcaaaagcagc  
ccttaattcaattcttattctacataaagaatgaatcaaatctccccagtaggttgaacctacgaccagtgatgaaacggcaccgctctaccactgagctac  
tgaggaaacaaagggttaccctcctagattcaactcccgtctcaaccatgaacaatagatccgaagcttcttgaactcccgaattctctgtagtgcc  
tccgttccatgctcattctataggtaaaccagagtgctctattctattcttacttcttagcacttctatcatttaataatccatcccttgggtctattgacataagag  
atgctattatagctatcttctatataatgaaagtcaagaattctcatgaacatcgagaattgtgcatatagaacttaaaagaaagaaagggagacc  
catgccatgatttcaaatcttctacttagtagtctaaattctcgtatgagataatattcggctgttgcggtcggactctattatgggttctgaccacattctcatgg  
gtcctcttagatcttcttccaatcttgattagggaaagagagatactcgcactcctgggtgttctattatggggcagctcatgattctcatatcgtatctatcc  
acctctgactatcttcttagtaaacgggtggaagatcccaatttggfataatcagactcaaaaaagcagctgaaatgactgaaatgcacagcttcaca  
ggatcactttcacgatactaaagggtggaatagcatttccgaaccttctataagaaaggttccattcttggaaatgacttctatacaactatagctat  
tgcaataaagaagaaagaaactaataagagcgaagacgcggaatggtatgtaagagagaaagattcttctgtttctgttctgaaatattctatctatctct  
agacgccgtagagaattgagaatttctatgcttcaattctcgtactgtaattggaaggtacggaaggagatccatcttggcaatgaaactacataaaaaactct  
ggacaatttcaaaacagcgaagcgttcaatcagatgcaaaaaaattcaatttggcccaccattgattagaagatttaactgtatgaatcgtattggttgatagc  
aataatggcagttgttcagtagttaaaggatacagatgtatccacaattcatttagagttacttaataagcctatttctataccatctctatcccgtgaaattctcgagcc

gaaagatggatgcatatgctatgtttcatttggctaaatgatacaatfaaacgggtatcaatccataaattggatagcaataaataaatcagcaaaattctttatftta  
gatagaagaaaagtcttctctataaaataaaagaatgtaccctctatcfaaatcaatttgcacgataaaataaatccaaatccagtagtagtaataattgcaaa  
ttttgtgtgacgagattagaataactcaaaataactgacataatftttttctgatcagaaaaatacatgaaaaaagaaaggagtagaaaaatfttggattatg  
gtfaaagaagaaaagaagaaaactggggtctgtgaattcaagtattcaccataagatacggagacttctcactttggaattacacaaaaaagatt  
ttcatcggaaaagggtcctcgaagacttttggaaaacgtcaactgttctgcttatttggcaagaaaaatagagtacgtfataaagaataatcagtcagttgat  
attaggagcggtaatttcatcgtcgaattttttctattttatagtagtcttatagtacttagatttgcattttagtagcctcgtttgaggaattcatggaataatcc  
atftcatggaataatgaatfaaggaagaaagatagagtctaccgctfacaagaaaagatctcatgatagcaaatggcctcagcaccatcaatgcatggtg  
tcttcgactgatcgttactctgatggtgaagatgtattgattggaaccatattaggcttattacagaggaatgaaaaaatcggcaaatagaaaactacttag  
gcaggagatagggaattccttaagaaaagaaaaaagaaataagaacacagatacaataaaaaaagaataaataagacgaattcgcctccccctacatatt  
taatttctctctatacaaaaactgacaagactactcattggtaattccatcaatgacaccttgcgaaaaactgcgttagttcggtaaatccttataccaaggt  
aaaggtcctagatagaaaaatctatataaaccgcttattatgaccaactatatactttttttagttgtaggaaaaaacttttccgcccccttacaaggaatt  
atfaaatccaaattctgaaaaaaagagtaagcagatccataaaacataatgctatgaatagaccaaaaatgctagacttacagaagaattgcatagtgataaatt  
catatgaattatggaagaatagaacttcttggaaaaagtgtaggggagtagaccatttgataatggttaattcccctatttattcaaaatgattctctatag  
atccaataaacaagtacaaagcagtaataagaagaggaaatagcatagatttcccgttcatgagatagacaaaagtgttttagtcccccaatgaagtactaa  
aggacctatcttattctgtattaccatgaatttggatagatttggaaaaaagaactccacttctgctgtgataaacgaaatctctattgactcttttagata  
tcttttcccataacgatattgaataaacgaatcctttagtactactgtaatttggaaaatgaacacgcaaatccatcaaaaagtaaatatataccgaaacat  
ataaacgcagftaactctgcagtaaaaagagctatttccaaaaaagggtgaatataaccaactattactaaggatttcttggaccagaagcaagcaagagg  
tggataaccacaagagaaaagggtaccataaaaaacaagcttctgtaattggaatgtatttctaaaccaccataagaacctattctgacttttctgtgta  
tccaacaagaggttccattgaaatgaataacagatcggatcccaagaaataaaagctttcgaataagcatgagtgatcaaatggaataaagcagttgataaagac  
ctatacctagagctaacatcataaaccctaggacattgtagaataagctaaagcttcttaaatctctgagcaagagctaaagtgctcctaaagaaagtgtta  
gtgtacttataaagaatgaactcattatcaaggtagggatagaaaaagggagaagtcgagctataagaaaaatccccgcagcaaccatagttgctcgtg  
ataagagctgaaatgggggtggtcctccatagcctcggtaaccatagtgaaaggggaattgtgccgatttgcactgcaccaaggaaataaaaaagca  
cacaataatagtaagcaaggagttaattctattatggaatccagttattagctatttfaaaccaatcccgaactctaaactacctgttccaaaaaacctagaatt  
cctaataacagaccaaaatccccctacacgattagttacaaaagcttttgacaagcactcgtgcaattggcgtgtaaaccaaaagcctatcaataataggaacac  
attcccacaagctccccaaaaaataaattgtatcaattggaactagtaaccaatcccaactggaagfattgaaaaactatataaacaataaatactcaaatatcc  
ctcatcgtgagacatataatcactataaataagaaccaggattcctacagtagtaattagtaataacataatagaagtaagcgggctgattaagtatcaaatctaa  
ggaaaaatcattatgacggccaaagaccatagatattgatagataaacttcaatttattgtgaatagacaggtgaactgagaataaccatagctatactaaagtaa  
aacactaggaaaaagccatagcgcaggaagatttttggctgttggaaacaagaaaaagtcacaacccattgacataaactggaagtgaggagaagaggatt  
accatgcatattgatattgctcacaagaagaattgcaattttactgaaaatttactcaattttctataaaatgaaaaaagttccgattcaccacaaactaatt  
ctatctatttctgaaggataaaaaataactagaattcttaattttcaaaaatttctcattgaaacaaatcaaaaaataagaataggttttgtggttaaagcaaaaagta  
atgaaataactcgtacctaattacctaagaagacttttataaaatacaaaaaaagattgaaatcttacttataatatttttattfaaaatgaagcagctccct  
gtttcgtactcaaatgattggaattcaattcgaacttataaactatttattgaaatttccctcttattctcccgtctatattgggggataggccccatacct  
tatactgtatattgagagatattgaaatataaattgatttaaatagaaaactttgtatattctatattfaaacaaagctcaaaaaaataatataatgtaaaaa  
actcttcttaccgattagacaaaatgaagtaaaaaagaaatcagaatttcaatcttttagtatctaagtataaactaagaaaaagaagaagattgatt  
gcggcaatagatgcttccatacaactgaaaaaagtaattccttttgaatggcagttccaaaaaacgtactcagatgcaaaaaagcgtattcgtaaaaatctt  
ggaagaaaaagacttattttccatagtaaatcttattttagcaaaatcaagatcatttctggcgtcagcagcatccaaaacaaagggttttctcgcaacaaa  
caacaataatagggtttgggataatgaattgacatcctcccaaaaaatccaatttataatgaataatggaataatggaataatgatttaataatgatttactttat  
gtgtgaattcctcgtacaatattctagaacaaactctctgatataaaaaaagggttttggatfactgtacaaatatttttctatcaatgaactttcgtaat  
agaatcgtataaataaaaaaagggttctattatgaaaagtagagtttctcgaataagactfacaacttctactctatcctaaatcaaaaaaataatgatt  
tctatattgcaactgagaaaaaattgtccaaactttcaagtttctattggcgaagcaagaaatttttggtaaaaaatcgaacgatactaccaaacgaagctatttt  
aaattgtagacacgctccttaggaagcagtgctcaagcactcgttcgagtcgagcaagaaataacttaatttcttaataaacctgtatttcaactagccgcatggtg  
attcaattcgaatttcaatttgaatgggaccttctctattgctatttgaactttagaacataactaactatatttcttcaacaatttcaattggtattacgattca  
ttaataacctattagttcgtgaacttggggattgctgattcgcagaaaaaggaatgatagccatttttctgtataacagattcttagtttctggtgcttctc  
ggacatttccatgaatgattatagtgctcattgatcttcttcatggtcctctgtatattctctatgattcctaagatacagaactcaaaaatgatttaagcacaataa  
ctacgccgagtagtatttfaacgaaggcttggccacgtcgggtcttfaactgaaatgcatcaatccacaatactagtagctctacaatcagtggttaatgatg  
atgcaagtatgattactaagctatgcgacttttggcgatccttattatccgccgtcttctaatgattagatttcaaaagaaatgatttcttcaaaaaaga  
aaaatgtttgctfaaacattttcttaatgagattgaaatctctatgcaaaaagaggtcttfaaaagcacccttttcttatttcaaaatattacaataatcaattaat  
gagcgtttgattcttgagttatcgtgctcattagcttagggttacccttttaaccataggtatttcttggagcagtagggctaatgagcgtggggtactactgg  
aattggatcctaaagaaacttggcatttacttggaccatatttgaatattttacatagtagaacaatacctaaatggaagggtagcaagcagcattttagctt  
ccatagatttctataatttggatctgtatttggatcaatctattaggaatggttacatagttatggtcatttaccatcaaatgattacataacataaacct  
taataaatgaaaaaacttccattttgtgttattggaacccctgaacgcctctcaaaaggttctcaaaaatcagagatagatcaattagacttttacttttct  
tgaatttttagtatttccactatggaatatagagcggactagtagaagaaaaaactcatttaggataaataatggataaacagagcctctacctgtcaacggatag  
cgagagaacaaaactcgtgataaataaccgattcctattactgtaaaaaagatacagattaaaagaaagatttctcgcggccggaatcctcaaaatttctgttgaac  
atgaaatagctgtatccatagaacatctgctgaacatagataaataaataataggagtaataatctcaaatgcccattacaaaagtaattgcttttggcattaca  
gaaatttggactagtaattgctcaaaaaataactaattccgcaacaaacactcattcctgtaaggcaagagaagccattgaaaagctactaaacatggttaa

aaatfttggcattgggatagaaccctcccagttcttcgagataaacaaggcgacttctacacaagccgttcccgctaagaaaaaagtgtagcccaataaatc  
catgggataatattgtaaaaatgctccattgagtcgaatgttggfataagcaaccatctataataatgaaccctatgtgagagacggaggatgagctattcttttt  
gaaattgctgtggccaagagaaggtgagctgcatagattttgcatcgtctctattactaaccaaggggaaatagataatgagcatgaggaacaattccata  
ttgatccgaatcaatccgtatgctcccatttaataaggattccgctaaaagcatacatgtactgtaatgctctcccattgggtatctgtaaccacgtatgtaggggt  
ataatcggcaattgacagcataagcaataagggaagccaaaaataaatagtatttccaatgtgagggatgattgattaataatcttccaaatcaatcttgggtcgtt  
ggaaccgtataagccatacctagaactccgattaagaaaaaatggaaccacctgcagtatcaaaaataaactttgtagctgaatagagacgctcttccccccc  
acatggataaaagtaagtaaacggaatttaactccacatgataaaaaaagtaaaaggctcgcggaagaaataatcctattgaccgctatacattgctag  
catcaggaaatagaataatcgggaattccgggtaaccggccaagctgctaaagtagctaaagtagctataaatcctgtcaataaaatagatcctaataaggaatccat  
cgattccaatcctcagtggaattgagacatctatcatttagaatcctcttfaattgaitaagggtcctccaattggaatgataacagaatgataagctcata  
gaaggaattctaataaacaataagacatagtataccacctaagattttgttcccctatgaggtaaaagaaaataatgaaccgcaaatatcggcaaaacaaca  
gtattgtaaccaaggaagaaactcatgataaagtgataagacaagatagcttggaccagaaaagcccgtgctgattatttggacacagccttctcggtaag  
aggaaatcagacgattcaagtggaattttgtaacgtatcaataagatagagccatgctcggggtgtctcaggtcctaataaacggcgacgcttaaaaaatcgtt  
ggcagcgggattcgcactcttacaaccacacaatctcgggtctggcgggaagcaattgcttggcttaccatcccaaggtatcattcaatacatctgtt  
gacaagctgtacacattgagtgatcctatacatgtatcaaaatfttaccggaatgtgacattggtatcaaaatfttccatcaataaaaaatfttgcactg  
atgaaatgactataatcaaatgtattgtgacaccagacgaagcaatgtttatcaaaactcaacaataatgcaataatfttcaatcgttggagaagc  
atgaaaagaccaaagactgaaatttgggtcacaacataatatacgaattgtatatacgaattcgaattgccaataaattggctatcgttttcaataaatt  
attgcaatattcaaatgcaatataatgaattgcaaaaatcaactaagtaaaaaagaactatggaataacctactcaaaaaatagatfttcaataaataaata  
ttcatgttaaatfttcaataaataatagattcgttaaatfttcaatattattattatgtctgcttggtagaagattctatgctaaatfttcaaaaaatgattgatt  
atcagagttgatttctattacgtgattggaagaaatggataatcctaagctgctcagcagccgcaagggctatacaaaaaatgcaaaaatgctcctttta  
attgctggctatcaaatagatcagaaaaatgttacgagatttagaattgaattcagataaggtcaagcatattagagctcaaacatgcttggctgtgacatcc  
atagataccaatcgaataaataagacactcaaaaaagtaactgctcaaacatcattaactccttcaatctcgattcattcaaatgaggacaagaattgaa  
ccgattgaattaatagaatgaacaattacacaacaaaagagaagaaggtattgttggcagtagatgggttactaaatcaaaatggttctttagtattt  
tagattgaaattctataatfttgaactcattcaagtattcttattgcccagccatagtaattgacacttaaaagaaactagaagaattggaatgagttcaaatgga  
gataaaaaatcgggtgctaaatgaatcccaatfttgaacgttatttagagaccctgttctactatttggttgatctgtagtccaaaagaattccataccatgacgtatctg  
ggatagtagctcattagtaaaaaggaatgttatacaaacgagtgaaatggaaccatcctaatagtccaaaatfttctttagaccattctgagccattacgaac  
attacggcaaatatgatcaagacattatagctcccacataaataagaattgtgcccacagctcaaaagtaggaattcaataaataatagaataagatatacaacaa  
gaactaatcctagcgaaaaaagcagaaaaatggtggttgaagtaataaccaccctagacccttagtagaaacaaatccccaaatagcacaagaattcatg  
tattgcccagtaaatccattatgataagaagaatfaatagtataaattttcatgaactgactaaaactaaaagattcaaggaagaaaaaggattaggaatt  
ttttgtatattgtataaagttcttctatagtaaatcacatcacgaaaatcactctggtttaaactcaggaataattgcaataagcagtaggtattcttctta  
gttagtaagaacttttggattctaaacaaaaatctagtaaatcagtaactgttctgaattccaagattttctctgctatttactttgagttgaattcctaattgttgaatt  
gtgtaatctccattatggagattggaaccgactcaagcaatfttattgtaattcaattcatgacgatcataagtagaaagttcatttctcagtcattgataaacggt  
tctggacagtagtaacacaattaccacaaaatatacaaacctccgaaatcaactataaataagcaatfttctctttaaataatccttcaaatcctcaatccacaaga  
ggtagatctataggcatacgcgaacacatactcaaacgaatacattatcaaatcaaaatggttcgccccggaaacgctccgatgtaattgattttcataggg  
ggtagtgaatcgttataggaaacgattgtgtgggataaggaattatgaaactttgaccatgacctgtcgcgctattgttggaccataactcatgaaccaggt  
taccatagggacaatattgaaatattatgaaaaaggtatgttcttcttcttggagaggactttgttgaataatcttactgttattgtattatcttattatagtg  
aacaagttgggaagattgtaataagagattgccagggaataagtaaaagaaatfttccatccaaagatttaataactgatcattctcctcctgggtaagtc  
cttattgtgatagaatgagaataaataagctttagtaataagatactatgctatttcaaaatccaacttttattcatttggaaaaatccaaaaag  
gataatagggaaatgacaatccaccgcctaagtagaagactgttacaataaagaggaaactaataattaggtaagaacaagataaataaacatattg  
ataccagaatattcgtttgataacctgactaattctcctccgctctggttaaatcaagggtaactcttccactccgcaaaagaaataaagaaacagaa  
acatggtcctaccgctattccaaaccgtacatgaaaccttagtttcacacggctcctctatgatcagaaaaaggaagtagtttctcggaaatcctccttataa  
agttagaattatcagaataaacgattcacaacgtcctaataatgaccaaaggaatctgctgctagaataaataaaaaacgcttcggaattcctccttataa  
aaaggtacttttcttctcagcaataactfaactctggaaataaacactcgtataaacaataaataaacgaaaagagttgggtatttagttcatgaaatctgtatgaat  
atgataaacgacgaaaagaataaataagatctttttttgtattgcaattcctattcttttctcctccgaggggtattttaaagaaaaaaggaataaa  
gggttaattcgttctgatagccattcctaacaagtgaaatgggaacatactctgacggaatccgaagaaagtagtacttctcctcattcccaatfttcaagtcctat  
tatgattcctttatgagaaaaatattcaatgctttagattcctcattactaactcctttagtacttttagtttcaatcctcactaactttttagtattccctatgattaca  
actttctgtatcggaaatccttatttggccgctcaagatagatgactaactcaaaaaatcacaacttggggtaagaatfttaccgcttatttacttccattttt  
ttgtacataggaatgagatttttcttcttactacaatfaataagcagttttgttcaactatagctatctggttaacttactaacctgaatatagaataaagaaaggag  
gataaattcaatgaattcagaggaagaaatcctattttaacgaatcgcagtagagatattgctagtacaaaaagttatgggattcataactaatagattgag  
cggcagctgtagaccactgaaaaagaatatttattttgagctatattcctccataagaagaccataggaacaaacttgaatggcaatccataaaaaaacac  
caactaagatccgctaaaacaagcgtatccaaaggaataactaaaaacttaataaattgataactgctatagacgggtccaatgctaaataagggaaat  
cccctgggatgcaagatattccttfaaaaagtagctttagtccatctgctatagcttgaagcagtcaccagggggccagcatattcaggccaatcgttggat  
cgatgcggaatttcttcttaaccacacaattacgagtagtcttattgtattcccagtaagagggtcaaatggtagaatccatcagtcctatagacttcttata  
attcaagttcgaagaaatgtagcttctaccctgtaccctgtctattatcattcaacgatcaacttctccataatgatcttactacctaataatcgtatgataca  
gcaatftcattttttagtagctgaggaagaatttgaataaataaacgggtggacgaatttccatctccaggggaaaaagactatcctcctaccagataaatt  
cctaattcacttttgggcttccactctgcataaagctctgtttgacaattcaaaatgggtgaaggtttttaccaagaatcagattcaaaatcattccattcggaa

ttctttgcttttaaaagctcggacttcaaaatcfcataaggccccggaaatttttctacagcctgtgaaataatgattgatccctcattcaccgattcgtactaa  
atagcgtgctaataatccccttcttttccattgactttccaatcgaattgattgtaagactcgtaaagatcaactttacgaagatcccattgtattccagaagctcgtg  
acatggggcccgataagcccgaatttacagcttcttccgctaataaaaccaactcccactcgttcacaaaaatgggattctgtgtaataagttgtgatattcaa  
taactcctgtaaaaaataacacagaaatcaaacatttatcgtatccatcacaaggcagatcggcagcaactcctccgatgcgaaaataatgcatattcgc  
acctgtagcagcttcaaatagatcatataftaattctctctctaaaaataaaaaaaaaaggagctcgcaccgagatcgtccataaaaggccaagccataacaag  
tgagaagctatacggctcaattcaacataatcccaatatacgtgctcttggggatttgaataatcctcaagaattcgtggtcattaccgtattgcttctgtaaac  
atagtagctaaataatcccagctgtacataaggtaagtattgtataatgctgggtttccgcgatttttccattcctctgtgtaaatagcctaataatgggttcacaatca  
ataacatctccaccatcgagagtaacgatcagctcgaagaacaccatgattgatgggtgctgaggggccatattgactatcatgagatctttctgtaagcggtagac  
tcatatcctttctcftaattcatttccatgaaatggatttccatgaattcctcaaacgaggtcctcaaaaatgcaaaaatcaagactactataagactactaataa  
aataagaaaaaaatcgaacgatgaaatfaccgctcccaatatacactgactgattaattcttaaacgactctatttttcttccaaataagccagcaaacgtt  
acgtttcccaaaagcttcggagaccctttccgatgaaaaatcttttggtaattccaaatggaagcaagctccgatcttattggtgaaactgaaactgaaattc  
aacagaacccagttttcttcttctttaaaccataaatcaaaaaatcttaccctcttcttttcatgtattttctgatcagaaaaataaaaaatgatcagttattt  
gaagttattcctaactcgtacacacaaaaatggcaattatctactactggaattggattatftttatcgtacaaatggattggatagaagggtaacttttattt  
agatagaagaaaatgttcttctatcaaaaataaaagaatgtgtatftttatgctatacaattatggaaatgatacaccgttaattgatacatttgaacaaatgaa  
acatagcatatgcatccatttccggctcgagaattcacgggatagagatggtataaagaatggctattaagtaacttaaatgaaatggatagcactctgtatcct  
taacatactgaacaactgccattatcgtatcaaaccaatagcattcacaagaatccttaataatgggtggccaataatgaaatgttgcataatgataaaga  
cgcttggcctgattcgaattgtccagagttttatgagttttcattgcaaaaatgatggatcctccgaactttccaattacgagtagagaattgaaagacatgaa  
aattcctaattctacggcgtcagagatagatagaatfttcaggaacaagaaccagaaatccttctctattcactaccattccgcgtctcactcttatta  
gtttctttctttaaagcaatagctatggttgcataagaaatccttcaaaagtaatgaaacatttcttataaggaaatggttcgaaatccttacccttttagt  
atcgtgaaaagtacactgtgaaagatcgtcatttcacatccagatccgtttttgagttccatgataaccaaattggatggatctccacccttttagctaaaga  
aagaatagatcgagaggtgataatagatcagatgaagatcagctgccccataatgaaccaccaggagtcgcaaatctccttctcccaatccaagattg  
gagaaaagaatcctaagaggaccatggagaatggtcagaaaccataatagatccgaccgcaacgaccgaaftaattatctctcagagaacttagact  
actaagtagaaaagattgaaatcatggcatgggtccttttttctttagatgtttctatgcaaatctcagatgtttcagatgagaattcttacttccatata  
gaaagagatagactataaatgacatccttatgcaataagacaaaggatggafataaatgataggagtgctaggaagtgaatagaatgaaatagagccact  
ctgggcttacctatgaaatgagcatggaacggagccactacgaaagaatccgggagttacgaaagaagctcggactcatattgttcatgggtgagagcggga  
gttgaacttaggaggtcaatccccctgttctcagtagctcagtgtagagcggctggctgtaactgactggctgtaggtcgaactcacttggggagattg  
ttcattcttaataagaaataaaagaattgaataaagggtctgttacccttagagtagtaaccgttcgctatcctgtttctattgattttatctcatcgtatcacat  
tctgttctacgattccacttcgacaaaaggaaagacataccaagttcaatagctttacgtccgctatccgatcatggtttcctaccctcagggggaaagtaagg  
ccctcccccttggaaagctgtggcggagggaggttcgaacccccgacaccgtggttcgtagccacgtgcttaactcctgagctacagggccaccctctcc  
actggatcttctccgggggtaccccccaaaaggaaacccctcctcagccatttcttccgggttaagaagatgggaaagcccccttctctataagaacagt  
cgctccgaggtgtgaaatgggagagaggggatgtgatgattgaggtttgaaataagacgaccttgcatttggattggatcttttctgatttcaaaaatgtaaaaag  
tcaataagaggtgttaagcttttatcattctgcatcagctattttccgcagaccctccctacagatcgtcaccgcaagtagatgtaaaccaaaatcgggat  
ggattggtgtgtcctctacgcctagacaccagaatatacgaacatgaacgaggaaagcagatgagagaatattggctagtaattgtaagccccaatcttgc  
tggaaaggacacaaaaggcctctgccccctctctatctcaagagatgaaaggcagagcttttttggtttttcatcttttcaaaagattgaaacatgaag  
atagatggcaagtgcctgatcattgatcaggtcgttaggaacaagggtcaaatcgttctggtttaggatgcctcagctgcatacactcactgcaactccactgac  
acattttaaacgctcgtctcggcgtactcttcttccattctctctctctcgtctccatcccgtatgggtggagaaccgctcgtctcggctgtctaccggag  
gctctagggaagtcggaggagagcactcatctgggtgggttactcttctctctctcgtactggaaggtcctcctcaatgctctaacgccacaccggatagaccgaactgtctac  
gacgttctgaaccagctcagctaccgaaatggcgaacagcccaacccttgaaccacctacagctccaggtggcgaagagccgacatcaggtgcca  
ccttccctcgtatgtgactctggggaagatcagcctgttatccctagagtaactttatccgttgcagcagcccttccactcggcaccgtcggatcactaaaggc  
cgacttctgctctcagcgggtgagcttctcagctcaagctcccttcccttgcctcagcagaccatgtccgtctggcccgaagaaaccttgcacgcctcc  
tacttttggaggcctacgccccataagaactgtctacctgagactgtcccttggcccgcgggtctgacacaaggttaaatccgagcttccagagtgtatctc  
actgatggctcgggccccccggaaggggccttctccttccacctaagctcgcaggaagggccccaaagccaatcccagggaacagtaaaactcattag  
ggctttctgccaaggtcaggttagctccatcttccacagacatgtctatttaccagctctctcagacagtgccagatcgttacgcttctgctgggtcggga  
acttaccgacaaggaattcgtacttaggaccgttatgttacggccgcttaccgggcttccgctcgcgctccctgctacagttcaccacactccttga  
ccttccggcactgggcagggcagccccacatacattgcttaccgatttgggagacctgtgttttggtaaacagtcgcccgggctggtcactgcacccccctt  
tgcgagggggcacccttctcccgaagtacgggctattttccgagttccttagagagagttgtctcgcgccctaggtattctcactaccacctgtctgggt  
tcgggtacaggtacccttctgtgaaggtcgtcagctttctgggagatggcatgggtacatactcagcggcgtagcggctggtatgagcctcgtggagaag  
caatggctagtcacgggctcactacagcgtcagcgttggactcggacctcggctcagggcattttcttacccttctaccctgaaaaagcagggtcac  
cttgtctttaaactataaacatttcttggctaacctagcctcctcgtccctcctgaccaacaaggggtagtagcaaatattgactgtgtccatgactacgcc  
ttcggcctgatcttagccctgactaccctcgtggacgaaccttgcggagaaaccttgggtttcggggcattggattctaccaatgtttctgactcaagccg  
acaattctcgttccgctcgtcgaacccccgttctcgggttctcctcctaaaggcgaacgctccctaccgatgattttgacatcccacagctcggcagatcgtt  
agccccgtcattctcagcgaaggcgtcgtatcagtagctattacgactcttaaagggtggctgtcttaggcaaacctcctgctgtcttggacccccacc  
tctttatcactgagcggctattagggccttagctgtgatccgggtgtttccctctcagcagatgaagcttacccttagatgccaagtaactgctcggcct  
tattttgggtcatatctagatcagatttgcctcatttggtagcgtcgcgcagcccgaacagcttacccttagatgccaagtaactgctcggcct  
caacgacttccgggagaaccagctagctctgggtcagtggaacttccaccataaccacaactcactcctgatttccaacatcagctggctcggactctgcta

gtttcatccaagcttcatcctgggtcatggatagatcaccagggtcgggfcataagcagtgacaatcgcctatgaagactcgtttcgtacggctccgggtgggttc  
cgttcccttaaccaagccactgcctatgagtcgccggctcattctcaacaggcagcgggtcagagataccttcccctcccactgctgggagctcagcacgggttc  
acgttctatttactaccactgggggtcttttccctcaccgggtactctcgtatcggcaccaggagatttagccttgaagggtgctcttctgctgattcac  
acgggattccactgccccatgctactcgggtcagagcgtaaagctatgctgttccggctactggactttagccatctagggtgcggactcaaccgttccgcta  
gcagcacacgctgtatgctctcccacaaccccgtttcacgggttaggctgtcccattcgtcggcgtactacgggaatcgttttcttcttctctggtta  
ctaagatgtttcagttcggcaggtgtctctgctctgctcatggattcagcagcaggtcacaaggtgacatattgggaatcctggatctatgcttatttcaactccc  
cgaagcatttctgctcgttctacgcccttctcgtctctgggtacacgtatccaccgcaagccttctcttttgaacctcgccttaaacgttaaggctatgccatcct  
aagggtcactaataatggaagatctatcaacgtccatgaatgcgaatcatagatcgaactgccgaatggcaaaatcgggtctatcatagatccgtaagttcac  
gggctggagataagcggactcgaaccgtgacatccgccacagggtaaaccaccgcctctcagcctcccggacttaccatagaggccaacgatagac  
aataactccccccgaacacagcttacaacttcatcgtactgtgctctcacaagagcaactcttcaaaatctcaaaacaaaagggtgctgagttggaatccattcta  
aggattctgtggttccggggaatccagctacaggagaaccagggaacggggagctcccccttttccggcacttctgatctaaacttaagaatgctggttttaa  
gaacgagtgattgcccttctccgacctactgccaaccggagagcggacggctaattgttccacttattgaacagggtctatgctcgtccgtgacctggac  
gccgaaggcgtccttgggtgatctgtagtcttacggggtggagataatgggtcggtecatgatttctcttcttccacattcgtcaaaagggtgaagg  
agatagtgcatcaagctattcgaaggccaacttgatccttcccaggatcccagatgagggaagcctaggagagccgccactccaactatcctcatgta  
cgatcatactagatctgaccaactgccatcctactctctactctttttgacagcccactcttttctcagtagagctttcagtgccatgtttcagctcttcccatt  
acttagaaaaagtgagccaccgggtcaggtacaagatactaccattaccgctggacaattagacagccaaccgtaacgcaacgaccaatgcaagagcggga  
gcttccaactgagctatatacccccgagccaagtgagatgcaaaagagtcagatgcttcttattcttcccctggcgcagctggccatcctgactgaa  
ccagagacctgccgtgaagtaaatcatcggcctacgattccaactgggagagaatcaatagactcctttcggagcgttccatccttcccgaacgagc  
atacaactctcgttctcagctcgtctcaaggtgcttcttccccttccccttaccatggcaagctccttgggaataactccgatggcgagaaaaaggaaggcgt  
taagagacctcctggccaaccctagacacttaagatccttttcaaacctgctctgctcccattcgaagtagatgataaataagccacatcccattgcaactg  
atcagggcgtcgtagtgacttagggagtcgaagaccaagaagtgcttattataccaagcattccttattggctagatccaacctcctggtccctgcggaaaag  
gaaaaagaatttcacgttcttcttccaggaaggaggattagggaagtcctattgattgcttctcagaccgccgggaaaagcatgaaaaaaagcgtcgaat  
ggtacgatccctccgtcaccagaatgaaagggtgatctgtagtcttggctgtgaaagatgctgttaggtgctccatttcccattgaggacgaacctaacct  
gtgctcagagatagctctccatacactgataaggatgatgattctcagagaagaggagccgtagtccccccggaccgccggatcccacgagtga  
tagaaagttagatctacatgggatctcacctgaatgccccatctatcctcctgaggagaagtttgggttcaaacctccgattcaaacaggaggtacgccatgc  
taatgtgcttggatgatccacatcttccgggtcagcgtgatgacacattgaactatccatgtgctgagagccctcacagcccaggcacaacgacgaattatc  
aggggcgcgtctaccactgagctaatagcccgtcgcggcctccccttggggagcctgtacgcaaaagcagaaaaactccatccccttcttggacatc  
cccctgcccacaccacagggggggcgtggggacgtcaaaaaggggatcctactatcaactaatttggccgacctagataaagctcatgagctt  
ggtcttacttccctaaacgaaagaagacttccatatacaagtttagctcagacgtagctccttcttttgggcgtgaagcagtgtaaaccaaaataccaataag  
cataagcattagctcctcctgaaaaggaggtgatccagccgcacctccagtaggctacctgttacttactccagctcgaagcctagccttagggatcccc  
ctccttacggttaaggtaatgacttcaaacatggccagctcctatagtgtagcggcgggtgtgtacaaggcccgggaacggatcaccgccgtatggctgaccgg  
cgattactagcgattcctgcttcatgaggcgaggtgtagcctcgaatccgaactgaggagcgggttttggagttagctaccctcgcgagatcgcgaccttggcc  
cgccattgtagcacgtgtgctcccaggcagataaggggcatgatgacttggcctcctcctcctcctccggctaacaccggcgtgcttcaagggttccaaact  
catagtggcaactaaacacaggggttgcgctggtcagacttaaccaacaccttacggcacgagctgacgacagccatgcaccacctgtgtccggttcccg  
agggcaccctctcttcaagaggatcgcggcatgcaagccctgtaagggttctcgttgcacgaattaaaccacatgctccaccgcttgcgggccccctg  
caattcctttgagtttacttgcgaactactccccaggcgggatacttaacgcgttagctacagcactgcacgggtcagctgcacagcacctagatccatcgtt  
tacggctaggaactagggtcttaatcccatttgcctcccagcttctcagctcagctgctggcccagcagagtgcttccgcttgggttcttccgatc  
aatgacttaccgctccaccgaaatccctctgcccctaccgtaactcagcttggatgtttccaccgctgtccagggttgagccctgggattgacggcgactt  
gaaaagccactacagacgctttacgccaatattccggataacgcttgcactcctgtcttaccggcgtgctggcacagagttagccgatcttattcctcagat  
accgtcattgttcttccgagaaaagaagtgtagcaccgtggccttccacctccacgcggcattgctccgtagcgttccgcaatgcccattgcccgaatccccact  
gtcctcccgtaggagcttggcgtgtctcagctccaggtgtgatcctcctcggaccagctactgatcgccttggtaagctattgctcaccactag  
ctaactcagacgcgagcccccttgggcggtttctcttctcctcctcagcctacggggtattagcaaccggttccagttgttccctcccgaaggcaggttctta  
cgcgttactaccctgctccactggaacaccactcccgttcgacttgcattgtttaaagcagcggcagcgttccatcctgagccaggtcgaactcctcatgaga  
ttcatagttgcaacttataagcttcttattcgtagacaaaagggttcggaattgttcttcccaaggataactgtatccatgcctcagattattagcctggagttc  
gccaccagcagtatagccaacctaccctatcacgtcaatcccacaagccttattccatcccgttcgacgtggtgggggagtaagtcaaaatagaaaaactc  
acattgggttaggataatcaggctcgaactgatgacttccaccacgtcaaggtgacacttaccgctgagttatccccctcccctcccctcagaaaagagaatt  
aacgaatcctaaaggcaaaaggcggagaaactcaagccaccttccctccggccttcttccacactattatggatagcaaaataggaaaaattggattcaattg  
tcaaccggtctatcgaataagattgactatgattcagccatagcacatggttccataaaatctgtacgatttcccgatcaaatcagcaggtttccatgaaga  
agatcttgcagatgttctattcagactggtaggagaagaaccgactcgttattcaaaaaagagggaagcagaaccaagtaagatgatgggtcggc  
ccttcttctgcccgaagatcttaccattccgaaggaaactgggtctacattctttcaattccattcaagagtttctatctgttccacgccctttttgagacctgaaa  
catgaatggcaaatcttctcttaggaacacatacagaaaaaggataatgtagccctcccattacttcttcttattgaattcagatgataatagaatcc  
atgtctaccgagacagaatttgaacttctctctctgcttaataaggcaagattgacctctgtagaaagactgattcattcggatcgatagagaccaactac  
gttgcattgccagaatccatgttccatattgaaagggttaccctctgtctctctctatgtacaatccttctcctgctgagcccccttctcctcgtccacagagaa  
aaaatggaggactggtcggacagttatcatcggaaagaaagaactcagagagccgggatcgttaactaatagaaatgactactaactaataatataagaat  
agatatctagaatagaaacgaactaatatagataatcgaattgaaaagaactgtcttctctgtatacttccccgttctattgctaccggggtcttattgcaatc  
cgatcatatagatattccttcaacacaacataggtcatcgaaggatctcggacgactcacaagcacgaaagccagttagaataatggattcctatttgaagag

gcctaaccgcatggataagctcacattaaccgtcaatfttggatccaatcgggattttcttgggaagttcggggaagaattggaatggaataatagattcatac  
agaggaaaaggttctctattgatgcaaacgctgtacctagaggatagggatagaggagaaggggaaaaatcgaatgaaataataaagaataaagcaaaaaa  
aaataagtcgaagatagaagagccagattcgaatgaagaatggaactcgaagggatctctgattctcaagaatgaggggcaaggggattgataccga  
gaaagatttctcttattataagacgtgattgatccgcataatggttggtaaaaagaacaatctctcttfaatcataaatgaaagtgtcaatagaacatgaaacgtga  
ctcaattggtcttagtcttccgggagcggagtggaagaaggcgggagactctcgaacgagaaaaagatccctcgaagaattgaacgaggaaccgtatgag  
gtgaaaatctcatgtacggtctgtagaggagcaggaagggtgacttatctgtcactttccactatcaacccccaaaaaaccaactctgccttacgtaaagtcca  
gagtacgattaacctctggattgaaatcactgcttatataacctgtattggccataattacaagaacattctgtagtattagtaagaggaggaagggttaaggatttac  
ccgggtgagataatgcattattcaggagaccctagatgctgtcgcagtaaaagaatcgtcaacaaggcgttctagtgcgtttagattctatccaagactgtatcat  
ttgatgatgccatgtgaatcgtgaaacatgtgaagtgtatgctaaccaataacgaaagtcttaaggggactggagcaggtaccatgagacaaaagatctt  
ctttcaaaagagattcgattcggaaactcttatatgtccaaggtaaatgaaatcttccagggttttcccttactttgtccgtgtcaacaacaattcgaataacctga  
cttttcagaacagggtccaggtcaaatagcaatgattcgaagcactcttttccattacactatttccgaaacctaggacttgatggtatggaataacagga  
ttccgatcctagcgggaaaaaggaggaacggatacctaatttaagtgtgtaaacgaattccatactgatctcatagatccctatagaattctgtgaaagccgt  
attcgatgaaagtgtatgtacggcttggaggagatcttctatcttccgagatccacctacaatagggtcaaaaaaagcaaaaaaataagtgattcgttttagc  
cctataaaaaaagaaacggattctgaacctttcagctcatgtcagctcggagctcagaaaaaagaactgcaaaatccgatcaattttcgtaatcgtattg  
taacatggtggttaaccgtattatgaagacggaaaaaacattggcttatcaattctctatcagccgtgaaaaagattcaaaaaagacagaacaaatccact  
attggtttacgtcaagcaatcgtagagtaactccaatataaggagtaaaaaaacagcgaataaaaaaggatcgacgcggaaggtccgattgaaatggatc  
aacaaggaagacacttccattcgtgttattagaagcattcccaaaagcgtccgggtcgaataatggctttcaaatagttccgaaatgtagatgctccaaag  
ggggtgggggtccatcgcaaaaaggaagcactcatagaatggcagagccaaatagctcttgcacatttccgtaaatccatgaacgaatcaggtatgtag  
acacatggtccatcacatctcgtcggaaaaagaatcagaaggaagcgtcagatacttctcgaacaacaacaaagggaaaaagaaacagaacagaat  
catgatcaactaagccctcgggggcttcttaagaataagaaggaatctttagaaatagcatggaataagggttgccttattcatgggattccgtaaatat  
ccattccaaaaatcgaacaatcgggactttcgggattggatgcagttactaattcatgatctggcatgtacagaatgaaaactcattctcgtattctacgaaat  
ttatgaaagcgttctatttctcttccagggaagtttccagaatgtatcctaattttggcctaattcttctctgatgatcattaacctctgatcaaaaagata  
gaccttggttctattctcttcaacaagtttagtaataagcataacggccctattgtccgatggagagaagaacctataattagctttcgggaaatttcaaacgaa  
caatttcaacgaaatcttcaatttcttatttattatgtcaactttatgtattcctctatccgtagatgacattgaaatgtacagaaatggctataacagagttctgttattc  
ttaacagctactctagggggaatgttttatgtggtgtaacgatttaataactatctttagctccagaatgtttcagtttatgttctactattgtctgatafacaaga  
gagatctacggctaatgaggtactatgaaatattactatgggtgggcaagctctctattctgttcatgtttcttggctatattgttcatctgggggggagat  
cgacttcaagaaatgtgacggcttataacacaaatgataactcccaggaaattcaattgccttatatccatcactgtaggacttgggtcaagctttcccc  
agccccctttatcaatgactcctgactctacgaaggagtggtgctgacaaatctactctatctctgaggtgttgggtttgcaaaactccatag  
atatgcagaagagaatgctatcccactccgaccaagacagaactttacaaaagttattgtatcttttgttcaataacaattaagggtgaagcagggtcagga  
acaacgaatcttattatgataaacagatccatttgcagctcgttattacgggtagttcctacaagaatcggactaatgacgtatacaatgcttgaattatcagctag  
atgctacatagtggttctcactctcagagactacgagttaataggagcatccgttgacaaaaggatccctaaagatgatcatctatggctattgggaacgaat  
caaatcagatggttctatttctcaacctttcgtactgtcctacggaaccaaggtcgaaggttgaaaaagtcagtcattcacaaccactgatgaaggttctcga  
aaagttaaaggattagtagttctttcgaatcgatttcaaaaagaatgattcggcttatacatagcggaggaaggtaatcaaaaagaaagaagacaagttctct  
ttctttatcacttagagccgtgcgagatgaaagtctcatgcacgggttgcagatgagaaagaagcggaggaatccttttctgactctgactccccactccagctg  
tcttttcttctgttactcgaaggtgctgctcagctcagccagcgaattctcgaattcttcttctatcaaacgaatggcattcttctgaaatcctagctat  
tcttagcatgattggggaatccttctgcttactcaacaagcatgaaacgfatgcttgcataatcgtccatagggcaaatcggatgtaattattggaataattgt  
ggagactcaaatgatgatacgaagcatgataacttataatgctttctatctcctaatgacttaggaacttttcttgcattgattattgttctacgtaccggaactgat  
aacattcagattatcaggattatacgaagatcctttttgctctctttagccctatgtcttctatccctaggaagccttccctcactagcaggttcttccgaaa  
acttctatcttctggtgtggtggaagcagcctatattcttctgtttcaataggactcctacgagcgttcttctatctactattatcaaaaatagtaagttattatg  
actggacgaacaaagaataaaccttattgtcgaatataagaatcccctttagatcaacaatccatcgaattgagtagactgtatgtgtatagatcattac  
tataccaggaatcaatgaacccactcttgcattgctcaggaatcccttttagctgtaggtctattcttagttcaagatcccttactaactggaataaaagaat  
tagtagatctgtccgccccaaaatgggaatgggctagggtaagtaactataatcatggaatcgaactcagattataagttcattccataccggaccagac  
cgtgcacattctattatgagaaggggtcattcagcctatggaaataggatactctgtttacatagaatccccacgtccttaccattctatttaggattaggaataggt  
aatcagacctgctttgacatattctatctatcttattgggtaccatagcactcttgggtcttattgaatcgaagaattggattgtacatttttattttgatacatat  
aagggtgctcagcagataatgcaaatcgaagctattttagtctgactcagcctatagaccgatcgaataactccaagactccactttgcatatattccatata  
tcacattagatagatcatattatggaatcagttcactttcaagatcacattagatagatcatattcatggaatgattcactttcaagatgctttaggtgaaa  
tggtagacacgcgagactcaaaatctgctgctaaagagcgtggaggtcagctccttcaaggcataatacggagaatgcgcatcaatgagcattccccgtaga  
agtattccgaaatctgcgctgctcctctatcttctgaggtccttaaccacttccctgagaaaaaggagacagtaaaagccaaatagactaaatagactg  
aacgatcctaaaaatccctcgaaggagataataataaagaacccaaagcagacggatcctactcgaagggtggtcttaagaatcaaaaagaggttctcagaa  
gagatagatgatccaacctctattgctctcgcgtaaagcctttttttagcgcagaggaaaaagtgactacgaatccccctttttgttcgaatccctgtttgatcctt  
gagcgcacgccataagtagcagatcaaggaatcagatcaaacgatcccaataccgtgaaagaagaactcccagatccagggaagcttatcaaaaagggttccga  
caaggggtttattcttctttagcaaaaagataagatcggatagattcgaaccgaattcgaaggtaatcactactatgccagcccaatcatgatcttccaa  
cttgatttggctctcgcgaaaatcgcgagttgcagagatgagaacctgaaaaagcaagatcccgaataaagaacagaacccagggaaccacaagagtg  
agactagtagatctcgtcttttgcattcttctccttttactcaatgattcattcgaattcccgaacaaaattctatatgtctattcataggcctcgttctaaagt  
tacaagatctagtcactggaactcgtggttatgaccgaatcctttagatggaacattgtcttttcaagtaaaaacccccagatataaagaatgaaaggtgc  
ttcgttctttctgtggaataagaagccctcgtacctaataagaggaaaataggaaatctttaggtatttgaccaaataggatcgtccagttcctatagaacctat

actaaaataccgataggctaaagcgaacgaaaaggatftccctgagatgtaaatgaaaacgattagcccatacagagttgggaataagtgatgagcaag  
gaatatacgtctttctgctaaaaggatctatfaaactafaattcattagatcctgttatcaatgtaactaggatcataagtaaacggatcccgttgcctaatctttg  
ataaccaaggtcattctttgctaaaagaaatgatcactatgagtcagactcaatagaattggatccattcacaatagcgagaataggattctggatccctctcaatct  
ctcttcaattcaggatccagagaggtgtttcatagtcactccgaaatattgccatccgaaatatttcgatttcattttctatgatatgctttctatataaaaattggtta  
ttacgatgtacgatgatccctgttaagcatccatggctgaatggttaaaagcggcaactcataaattgtaaaattgctgggttaattcctgctggatgcacgcgaacc  
ggaactcgaattctatc gatactggaactcagagcatagagggaaaagtcgatttatggatggaatcaaatcgcagctatttacgaaaaagtctctgtttattggga  
aagaatcaatatactftaatgctgaatcgggattcactaagacagaaataaaagcattgggtcgaactctctttgggttaaggtagtagctgtgaatgcatcgact  
acccggaaagggtagaagaatgggccctattctagacatacaatgattacagacgtagatcattaccctcaaccgggttattctattccacttctagatagagaa  
aaaaactaaaggagaacttaataatacggcgaacattatacaaaacacctaccggagcacacgaagggaacctagataggcaagtgaatccaatcca  
cgaataatftgacccatggacggcaccgttgggttaaaggtcgaatccagaggaaatcattaccgcaagcagataggggggaggtcataagcgcctataaccgta  
aaatcattttc gacggaatcaaaaagacatactgtgtagaactgaacatagaaacgaccccaatcgaatgcgtacattgtctcatacactatggggatggtga  
gaagggatafatttcatcccagaggggctataattggagatactattgttctgtacaaaagttcctatatcaatgggaaatgccctaccctttagtgcggttgaac  
tattgattacgtaattggaagtaaccaatagggttacgacgaaacctaagaatcagactgatcaattgactacctctacgggatagacctcaacagaaaactgt  
tgagtaacggcagcaagtgaattgattcagtagttccatagaaaattattgactctagagatattgtaaatggagaagacaaaattgttgaagcacgcacagaa  
ccggaaagcggccctgttcaaaagagaggagggacgggttattcacttaattgattgagcagaggcgaattgaaagcgaagcagtggaatgaacccccgggg  
gaaaatagggatgctcctacgttaccataaataatgtagaagatc gacgtaattcactagatcattcgaatgctacatgaagaacataagccagatgacgga  
acgcggagacctagatgtagaagatcataacatgagcggatcggcagattggattccttctatatacctactatggtgactctcactacatcattcataaagac  
catctgtctagagatcgtcatalacatctagaagcctgatgcttggaaagcgttgcagattgggaaaggggtttttgagagaaaagaaatcacttcaaccg  
atatgcccttaggcacggccatacaatacaatacaacacacgtggaaaggggtggcaattagctagagcagcaggtgctgtagcgaactgattgcaaaaagaa  
ggtaaatcggccactftaagattaccatctggggaggtccgtttggtatcccaaaactgcttagcaaacgctggcaagtggtgtaattgtgggtgaacaaaaaag  
ttgggtagagccgggtctaaagtgttgcttaggtaaacggccgtagtaagagggtgattatgaaccctgtggaccacccccatggggcgggtgaagggaaag  
ccccattgtagaaaaaaaccacaacccttggggattatcctgcgcttggaaagaactagggaaaaggaaaaatatagtatgattttattctctgctgccgta  
agtaaatcgaactaggaatattgaaaattgcaattttgcaatattggatggcgaacgacgggaattgaaccgcgcatggtgattcacaatccact  
gccttgatccactggctacatccggcccttaccgctaaaggattttctttttccattcattattctatttctgacctccatactctgacgagatattggacat  
cgaatgccacttttaaatgaaaaaaaggagtaatacgtgtgacacgaaaaaaacgaatccttttgatgctcatcttattggcaaaaatagaaaaggtaata  
tgaaggaggagaagaacaataagtaacgtggtcccgggcatctagcattctaccgcaatggtggccatacaatcgcgattcataatgaaaaggaaatataacc  
tattacatacaaaatcctatgtaggtcgaatgggggaattcgtaccaactggcatttcacagattatgaaagtgaagaaaggatacctcaatctgctgtaaa  
ctgaattcagaatagaagattcaaaaataaaaaaaagaaata

>O.glumaeputula\_IRGC88793\_cp

ccaatattctgctcagcaagatattgggtatttctagctttcttctcaaaaattgctatatgttagcagaaaagccttatccattaaagagatggaactcaagagcag  
ctaggctagagggaaagtgtgagcattacgttcgctcattactccatacaagattagcagcgttgatgatacagcccaagtaataaacgcgaccttggctatca  
actacagattgggtgaaattgaatccgtttagattgaaagccatagactaatacctaaagcagtgaaacaaatccctactacagccaagcagccaagaagaagt  
taaagaacgagagttgtaaaactagcatattggaagattaatcgccaaaataacctgagcggccacaatattataagctcttctcttacccttaccct  
cattagcagattcgtttcagtggtttccctgatcaactagaggttaccaaggaaacctgcatagcactgaaatgggaaccggcaatacaccagctacacctaac  
atgtgaaatggatgcataaggatgttatgctctgcctggaatacaatcataaagttgaaagtaccagatattcctaaaaggcataccatcagagaaactccttgacca  
taggtaaatcaagaaaacagcagtagcagctgcaacagagagctgaaatgcaacagcaatccaaggacgataccagacggaaactcagttcccactcacga  
cccatatacaagctacaccaagtaagaagtgtagaacaattgctcataaggaccgcatgtataaccatcacaacagatgacgcttcccaattgggtaaaa  
gtgcaatccgatcccagaaagtaggaataatggcaccagagataattgttccgtaaaagtaaaagcagaacagagcgtcacgaataccatcaatctactg  
gaggggcagc gatgaagc gataataatacagaagttgcggtcaataagtagggatcatcaaaacaccgaaccatccgatgaaagacggtttcgggtgctag  
ttatccagttgcagaagc gacccacaggcttctactttcgtctctctaaaattgcagctatgtaagatcttggttattcaaatgcaaggactcccaagcacacg  
tattaactagaagataatagaagcctgttatttaacagataaacatagactataccaatgcaaccaagccagccccgacagttgtatatccatacaaaaaattta  
ccaaaccaaaaattttgtaaatgaagtgagtgaaaaatcaaaactcagattgctcttcttagtttccatattgggttgcggcgaactcgaacccggaactagtcggat  
ggagtagataatttcttgtacaatagagaaaaaacctctcccaaatcgtccttgcattttcattgcacacgactttccctatgtagaaataggctatttctattccg  
aagaggaaagtctactaatttttagtagtaagttgattcacttactatttatagtacagagaacattcagaatggaactgtgaaagtttaccctgatcattatcaat  
catttctagttfattgtttgttaatgattaattaaggaggattcaccagatcattgatacggagaatccaataccaatacgtcactgtcgcattccacggaagaa  
aagtaagttgtttggcgaacatcaaa gaaaaaactgctcttctccgtaaaaaattcttcaaaaataccgaaccaaccattgcataaaaagctcgtaccgtctttat  
gtttacgagctaaagtctagcgcgatgaaagtcgaagtatatactttatgctgatacaaaagctctttttgaaagaccctgtgataatgaaaagattctacataccg  
accaaaaccgatcaagaataccaatccgataaatcggcctcaatgtgttactaataggatccccgatccagtaaaaattgggcttttgtaaaagatccaatgaga  
ggagtaacagggtctgtatcgaattttcatttgatctattagaatgaattctccagcatttgattccttactaacaagaattattgtactactgaaaagtac  
cccagaaaatcgaagcaagatttttaattggttagatggtatccttgggtgagccaaaaagagaagaatattgccacaaacggacaaggtaacattccatt  
tcttctcaaaaagagagttcctttgatcagaatgcttctctgatatgacataatgcataaggggatccataacgaaccatattggtttccgaaaaaaagcag  
ggtacattaacccaaatgtccatctctcagaaaagatgattcgtccagaaggtccggaaaggttaatcgaagcaagagattgttacgagaacaaca  
agaaaaattcattctgatacaatagattataggaaccgaaatagctttattttttcaaaaataaaaatgatttcattgaaagtaataaaaacttccaaatcga  
gtagtagttgagaagaatcgaataaatgcaaggatggaacatcttggatccggtattgaaagagttgaaagcaagatccaatggatagggatgattttat  
atgtgctagataatgtaagtcaaaaattgtcttcaaaaaggaaatattgaatgaatagatcgtaaattctgaaacttggattttcttctccggacaagactgttc



tcgtagcgagaatgggatttctacaacgatcgcaaacccctcagatagaatctgagaataaaactcagaataaaaaaattgtgtaatccaataatcgatctggta  
ggatgattaaccaaataatcctcaaaaattctgctgatacattcgaatcattaaccgtttcacaagtagtgaactaaattctgttattagaaccaataatctgacaagtc  
ggaaccatttaaccataatcatgggcaaacacataaatgtactcctgaaagagtagtgggtagacgaaatattgtctaggaaatfaagttttctgaataaccctcga  
atftttccattgtatttctacttgaatcagagagagaaatattctcgtttatcaaatggtgatacatagtaaatatggtcagaacagggtgtgcatfttttaataca  
accctggggaagaaaaggagctaatccacggatctttccgctctttctatccaattgttatgtttgttctaattacaaaagagaacaatcctttatftttgcagg  
ccaattgctctttgactttggatcacgctctttatcaatatactgctctttacacattcaatccataacatcctttcaatccaaaatcagaataaftaggattctaaa  
aaaaaaaaaaaaaagaaaaatcaaggtctactcataggaaaaccgctttccctacatcaggcactaatctattttaacgctcaattagatcaggggagtctcca  
attaagaagftaagctcgttctttttgtttaccagaattggagccaggctctatccattatcattagaccagaaaatcagaatftttttatccattccaaaatccaaa  
ataagaattgattttatgacatgctattttttccattcattacccttgaggatcagtcgcggtcttatagactctaccaagagtctggacgaatftttgtctcatccaaa  
tgttaaaaagatcatagtcgacttaaaagccgagtactctaccattgagttagcaaccagataaaactagatcttagatagatcgaatccaaaatcaatggaat  
tacaccgcacaccctgtcaaaatctfaaaatagcaagacatfaaaagaagattttatcaccattgaaaacactcagataccaaaaggagcgggtctgttfaatttc  
actaagggttaaaagtggaccaatcacgacgtaaaaattgcatftttttgactttttatfaataaataaataaactctgtatgagagtacaacaagagggacaacc  
taccatttgacaaagttagcaaaaaactaataaggagtgagataaaagacttatcatctacaatctagatgtcaatggaccctttgcaatggaatfaca  
atgtaagaaaaaataatagatagaaaaactaaaaataaaggcttatgttggattggcacgacataaatccagtcaaaaataggattaagaagaggcaaatf  
tctaatagttagacaacaagggatactagtgcctctcctagtttttattcatttagttctcaatfaactcaaaagtctttttcttfaaagaattccgctctctaaa  
atatacagaactgttctgtagttgagcaccctttcaaggaaatagagaatagctggaacattfaacaagttgattctttatcggatcaaaaaactacttttcgaa  
gatctctctctctcagatcgaacatcaattgcaacgattcagatagacagcttattgggatagatgataaacaagccccctagaacgtatagagggttt  
tctcctcactcggctcagaatagacttgcattatctcgtacagaaaaacaatfttatactcatgactcaagttgactaattttgattgacagacttgaagaa  
aaaaatcctftgaaatftttgagtcgctctfaaactctttctgctcactcgaacaatctacttttattccttattccggctcaatctattgttgagacagttgaaatc  
gtgttactgttcgggaatcctttatctttgatttggaaatcctgggttfaaacattactcgggaattctattctttttcttcaaaagagtagcaacatacccttttct  
atftcctcagataaagcattccctctctatagaatcgaataggggattgattctgatagacttttaatacaaaagagtttccatcttccaaaatggactttctct  
atftaacctttgattctatattatftcattctatattaagggtagaatgacaagtggcctaatttattgatttccactaacctagattcttccctgataaaaaataat  
tctgtcctctcagctccatcgtgactatttacttagcttactacaacaaccagcgaaaatcggctcgggacgaatagaacagactatgctgagccaaagagcat  
ttcattactatggaaaatggtgatagcaaaatccacaatcagatcgtccttcaagtcgacggttcttaccacatcgtttfaaacgaagtfttaacataacattct  
ctaattcattgcaaaagtgtatagggaattgatccaataggatggatcatgaatagcttagtttctgtttttgtataactaaactgcttctctatgagaa  
atatgataaaaaaagaattatgatttaccgggaagactccgcaaaagccaatttattaaaccatattctatcatatgaatgaatatagttcgaaaaaggggaata  
aacaagttgcttaagacttatttattggaattccatcctcaacagaggactcagatgatcaatccaatcctgaaatgataagagaagaattgactcttccaaca  
aataaactatcaactccgttfaaattfaaataatattagattgcaatctattttccataccattttccgtaacaaaactaattaactattaactagtaaaactattgc  
aatgaaaagaagtttttggtagttatagaattctcgtattctcgtactcgaataccaaaagaagaaaaaataagtaaaaaaacgacttctgtaaagttaaat  
taaggctttgcttttactatttttttaccataaaagaacactccaaatcaaaatgaaatcattctatcaacgagcagttcttatcttaccgggattgagatcat  
tctgataattaaaaaacgaggatcagatcgttttcgcttaaccaaaagaagaaaaagaaggaacctttttactaataaaactataaaaaaatttactctat  
cataatctatctaccataaaggaataggtctcgtttttatacaacgttctacgtcaagtttfaaaatftttcatgaaaaaagattttcaattgactggactgacactg  
gattatgtttctgagacagaaaatgaacgcattagactgcatcgaatcaagagttataagagaaaaaattcttfaataaactttatgcctcgtgcagaatacaa  
tacgatttcattttctgtttcactagaaaaaactcgggacggaagattcgaacctccagtaacgggacccaaaaccgctgccttaccattggccacgcccatt  
cgggtttatgagcactaataaacagattatgttttcttattcgtcaatcctactcaattacataaaaatgggggtattctctgttaggattctagacatcgaat  
aatatagaatccaaaaatgcatgatcattacatggaattctattaagataatataagaaagtcgaatttctccactctcatttgagagtgcaatacaaggagatttt  
gtgttgggaaagtcggaagaaaaaggatttgaatcctcttttcttttccctfagaaaaataactcaatacaaatccaattatctactctacaagaacgaaacgctt  
gttatgcctaataacttagttfaacctgatttggtttaattctgttattatccgactagttttctcgcctcaaatgcccgaagcttatgccatttcaaccaatcgtgattt  
tatgctcctacactgtactcttttctattagcctttgttggcaagctgctgtaagtttcgatgaaactttactactctgctgccaattgaaatcatgattcattcaaa  
aaaatcgaaaaatgataagagccgagaagcttataatgaacctcgtattcaaaatcfaaattcttactgaaatgataagctgcagcaataaatttgatcagc  
cttctactccctgcatctagcttggcaggtatctttagtaaccgcacaatacctaactaatttattgataagagtgcttattataaatcaattctgcaattttttcaaa  
aattgattttgcaattttgggtgcaaaaataaacaacccatcctagtggaattgtgtgtaaggaaaaacggggaatctattcttcaaaaaaaatcttggagattat  
gtaatgcttactctcaactftttgttatacagtagtgatattcttttccctctttatctttggattcttataatgatccaggacgtaactcggcgtgacgagtaaaa  
atccaaaatftttctacaatggattgttccatacattatctacgagaaaatccggggcagaatccttcaatcgaagtcaccaaacgatccgagggggcgg  
aaagagagggattcgaacctcgtgtaaaaaaattgtacaacggattagcaatccgccctttagtccactcagccatctctcccgttcaaatcgaaggtttcc  
gtgataagacagaggcaagaataacgattgcaaaaaatcctctttttcttcaaaagtcaaaaaaattatattgcaatccatttttagttatctttttctaatgta  
ataaaaaaaagaagaaatcttcttttcttcttaattcaaaatggatattggctaaaagacaatcagatagattttctctcagcaggcatttccatagactgtta  
taataaaacaagcaggttatagaaaaaactcttttttatttattacaacaagcaaaaaggggtcttacaaccaaccaccataaaatgaaagaaagataa  
agtaagtggacctgactcctgaatgaggcctctatccgctattctgatataaaatcagatgatgaaatgtataagtgattttttgatttcttagacttagacca  
cgcaaggcaagaattctcgtatttactattctattctgttactagatgttctataggaataagaagaatcgaaccccttccgctacacataaaaatggatttcg  
aaagtcaattttcttcaatatttattcttttcaaatcctattttgttcttataccatgcaatagagagcagtgaggaaaagagagggtacttttttcaatttccctta  
aaaaataggcttcttggaaataggaatcaggaataatcctgaattccaatgtttattctatagataaagaaactaattgaaatcaattcatgatttaccacgacctc  
ggctgtgacccatagataaaaatgcaaaattctatctcagaccattgaaaaagcattgaaacagaaaaatcgtccacagataatctatgtagctttgga  
agtataaaggtgctcggaaatggtgaagtaattgaataggagatcactatgactatagcccttggtagagttactaaagaagaaatgatttattgatattatgg  
acgactgttacgaaggaccgtttgtttgttaggatgtctgcctattgtctttcttctgtcttattcgttttaggaggttggtttacagggacaacttttgaacttc  
ttgtataccatggattgagcttctatttgaaggttgaatttctaacgcagcagtttccaccctccaatagtttagcacacttctgttactatggggc

ccggaagcacaaggggattfactcgttggtcaatfaggtgctgtggacttttggctctccatggggctttgcactaatagtttcatgttacgcaattfgaact  
tgctcggctgtfcaattcgccctfataatgcaattcattctctgcccacatcgtgttttggctcgtattatccactggggcaatccggttggtctttgcg  
ccgagtttggcgtacgcgatattcgtatcctctctccaaggattcataatggacgtgaaaccattcatatgatgggagttgccggagtattaggcgcg  
gctctgctatcgctattcatgggcaaccgtgaaaacactctattfaggacggtgatggtgcaaaatccctccgcctfataaccaactcaagctgaagaaact  
tattcaatgctaccgtaacgcttttggcccaatcttgggtgttctttccaataaacgttggttacattctttatgctattfctaccggcaccggtttatggatgag  
tctattgctgtagctggcctggctgaacctacgtcctatgactcgttccaggaaatccgtgcagcgggaagatcctgaattfagactttctacacccaaaat  
attctttaaaccgagggtattcgtcgtggatggcagctcaggatcagcctcatgaaaatctatattccctgaggagggttaccacgtggaaacgctcttaatggaa  
ctttgttttagctgctgaccagaaccaccggtttgcttggggccgggaatgccagacttatcaattgctgggtaactactggagctcacgtagcccat  
gcaggattaatcgtattcggccggagcaatgaacctattfagaagtgcccaattcgtaccagaaaaaccatgatgaacaagggttgatttactccgcacttag  
ctacttaggtggggagtagggccgggggagaagttctagatactttccgtactttgtatctggagtacttcaatctccgcagcttaggttgggca  
ttatcacgcctctggaccggagactcttgaagaatctttccattcttgggtatgtgtgaaagatagaataaaatgactacaatttgggtattcacctaaatfgt  
taggtataggtccttcttagtactcaagctcttattttggcggatataatgatactgggctcctgggggagagatgaaagaaaatfaccattggaccttag  
ccccggtgtatttgggtattactaaaaccccctttgggggagaggggttgattgtatgtgagattagaagataatgggggacatgatgttgggttct  
atfctgtatttggcgaatttggcagatcttaacaaacccctcgcattgggctcggctgattgtatggtctggagaagcttactgtctatagtttagcctttact  
gtcttgggtttatcgttggtttctgtggtcaataacagcttaccgagtgagttttaggacctactggccagaagcttcaagctcaagcatttactttctagt  
tagagatcagcgtctggagctaatgtgggatctgccaaggaccacaggttttagtaaatctaatgcttccccaacgggagaggttattttggaggggaaa  
ctatgcttttgggacctcgtcctcatggtfagaaccttaaggggccccaacgggttgactgagtaggtgaaaaagacatacaaccttggcaagaacgac  
gtcggcagaatataaccatctcttttaggctcttaaatctgtgggtgctgtagctaccgagatcaatgcagttaatgttttctcctagaagttggtagcgac  
ttccattttgcttaggttcttttttgggccaatttgggcatgagcagagccgggctgctgcagcaggtttgaaaagggaatcgtatcgtatfaggagc  
ctgttcttaccatgaccctcttaactaagatttcttattatcctgttctactgttttttctgttctgctcgggttattctatctagccgagccattccttctatgaaag  
aaagataaggggcagacaacaaaaaaacaaataaagaacaacagcttactcaatcgcaaaagaaaagagagaggaaagcaaaaggagagagagggttcga  
accctcgatagttctagaactataaccggtttcaagaccggagctatcaaccactcagccatctctccacagcctaactcttatttttaccataatagaacatagcc  
atacgaatgactactaacctctagaacatctcaatacaaatccctttcgtatatttctgtatactgtatcctatgatacaggatccgctataccgcttggaaata  
aagcataaaaccccctcaacccatatacaataaaaaaagtggtgagtaataagtttaagagagaatcaatggattcatgataaaccccctacttctgtattt  
tattacaatttggataagtgaggatcaataatataatgtagtcaacttatttggatgtaacttggagattagaataatgactattgcttccaattagctgttttgcatta  
attgtagcttctcagcttagtcaatgtagtacccttctatttctctctgatggttgcaacaataaaaaacgttattttccggtagatcattatggactgg  
tcttctgtagctattctaaatctctcttcttaaatgttttagtatttagtaccgatacaaaaaaaaggccgtttattcggattgtgagacgcaataaatgc  
aatfctgccccgaattgattgacagacaataaataaaaaagaaaactcaaatgaaaatgaaacggtcgaccagacatagacggtcgaccagccggata  
taccctataaaatagtagcgtagcgtatgctcaatgtaaaaacatctccttcccaaggagaagatacgggttcgattcccgccgctcagcttaatttagta  
aggtagctatgaaaaaatttagtctacttttataaagtaataaggtttagtctagtagtaccgtagcccttactatcttagcccccttgcacccactcaaaaaagagca  
ctacagcggcgggaatcgaactggcaaacagggttccctaaaccggggattcaccgaaacaacacagcaaacgctfataaagggaaggagatagactg  
tgcctttcttctatttttttcttctgcaaggtaggggcttggaggttctcttctgtgtagcaagttacttgcacactgctcaatttggccttatagggtcgggaact  
aatgaataaaagggttgataccgccaaccaccagccctctaccatctagacaataagaatagctctttatacagactgctaagtgggagacgggaatcg  
aacctgtagctcaaggtatgagcctcgtgagctaccaaacctgctctactcctcctggagcgtggaaccggtggagcaaaaagggtgaaatcagccctac  
catgctagacaataagaatgattttatagaaatgagcgggtagcgggaatcgaaccgcatcgttagcttggaaaggctaggggtatagctgacgttgggtg  
attatttaacgctcttaatacaaacgaacatgaaatfctgattcctcctcttattgggtattctcaccacttaacatcaatcagctttttgtctgaatggaacc  
aaggctctcgttctagatgatccctaaagagtaggagatagaatfctcctaaatctatcaatcaatctcgttccctaaatfcttaagagatcctgaggaaaa  
gaattgggttccaccgagctgaaacaatgctgatggtctagtaaacaaaactaccgttttagctatttggcttccattcttttaacaaaagaagatttagtfa  
cgattgaaataaattttttagtcttcatcctagatccttactcatatttaaaaatggaaatccttaatacaatgcaaaatgcttccgactctgactcataatcca  
aatcctatttgggttggatgcaattfcaatgcttgggtacaatcgcgaaaatgcaatfcttctcaatgctattgagagaaaaaggagtaaactcttctaaaga  
actaaagtttctcggaaataaaaaaccctaaaggacgccttaagtagatattcaaatcagtttaataagaacgaatcacactttaccactaaactataccgctac  
atgtaaattctgataccaacgctaccctttgcaagggtagccattcagaaagatgctaaatcctcttagttaatgaacagagaaggttctcctcagattagcgggtg  
gtacttcgatcggggcctttcttacttttcttttggcagaaatgaaacaagaatttgggggaaagaaacatcttccccacttcatgaaatctggccatagagaa  
agagtgagatgtttttttattatcatagactttccctatgcttggagagaacaataaataaactfataaagaaaaaggacatagagccgaaggatttactttagtaa  
agaagattctgaatgctctgcttagctgattctcctgttaacttttcttctcttcttccactcaattctagttattagattctgtttaaagaatcaagaagatgaata  
gaactaagaacacacaaaaaagagcatatagccccgagaccattacaaaagtcttccaataatcatattgggtatctgttccctcttcttctattagatggggc  
atgtggatttccatataccatcgaaccttaagggttccagaacctccttttctagtttccgaaacggaaaacctgaaccaggagcagataaattct  
actcccgcctttcaagaaaattggtgataaaactcactacagttgtfcaaatgaccaatcagaatccctgagaatattcaagtaccctattctaaagagaag  
aggtagctgctgaaaatcgtcaacaaatccgcttaagaaaaatgcaagtttgaactcgaaggttttccaaaggatgctgttaaaaattgttcaacctcacc  
aaaacagacaagaatatacactgaaaatataaccagccatagggatataagggcgcgaatcgtttatccccaccaattagaggaaataaaacataaat  
ggagaaaatttcatgataagatcgaacaataagaagaaaaagtcctaaatfctcagaccgtctgagcatgtaaaagtcaatgctaaagataaaaaacctata  
ctttgtcgaagtataagagagaatataaagatttcttcttatttcttaagatttttgaacctgacctgaatagacttatatctcgtatatacagatataa  
tgtacattatggagtagacctataatgggaaatgaaagtggcctaatttggaaatgaaataagaccctttaaactcagtgtagagtaatgccatgtaaggcataagt  
catcggctcaaatccgataaaggccttttttacttagtgtagagtaatgccgcgtaagacgtgagtcagtggttcaaatccgatacagcttttctactaaatcatt  
cacttcttcttttgaatfcttcttttttgaatfataacttagtgcgagatgcatgcttttttagtttaaacactaagcgaagcaggggggtgtaaattccaaaaa  
agaattggactcttttcttagatcaatcaatcactaccctagtaactaatatagaatcccttttattatctattcttattccatctctttataaacgaattcccta

aaaagtaggggatgatccgtgaafaacctaaccatcaactaaaaaaatcctacaaaagcataatggaaaagtaggaaggactccttgccttgatctagtatact  
cttcgagtatattgacaattccaaaaactgctcactatcattatagataatgaggagcgggtgtataccgccctatcgtctagtatgccctatcgtctagtggtc  
aggacatctctcttcaaggagcagcggggactgactccctggggtagggagtattgaaaggaggttaatacatagattatcaaaaacctagaataaattc  
ttctgggctgatgccgagcggtaaatggggacggactgtaaatctgtgacaatgtctacgctggtcaaatcagctcggcccaaaaatctaggcttcgga  
atatgagtaaatccatttttctccataaaaaagaataatgatccatgaaataaaagaaataaaaggataaaaagaaaaggaaatatttctaatctatactct  
ttcttctctcttacaacaaaagaccttttcttattggttattgaaaggtgattattatctatttttagcgataaaaaatcgcacatactagttatgcttctactatac  
ccccatcagatacgggggtatgtagtatatgattcgtctatttcttagagtaggacaggcgaatattcttattcttaggtccatttaagaataagatgccatacggcc  
gggggattgtagttcaattggtcagagcaccgacctgcaaggcggaaagctcgggggtcagccccgtcagtcgccgaactagggtcaatgaatggagaatc  
atcttctctttccatgaaaaaaggggggcaggaagcaagatcaaatccatggggtagccctatttctatttttagttcgcgtttctcagtaaaagagagagagta  
taggaatttttatcactacttctggttgatagcgaagacatacatatcagtggaagggatccctctatggtatactattcacttcaacctgaattgattgtag  
atccgatattcataatattgaattgattcagttatcagaatgcaagtcctccctgaatttacaggatcccttttccctccatgggattacatcccagttatgcca  
aaaaaagagggttattggaagcaatattctcgcatttattgctactgcattgttcattctggtcctactgccttttacttatttattgtaaaaacagtcagccaaaatgatt  
aattggaagttcaatcaatgaagaaatgaaaaagggattaafataaaataaaatccaaagcttaaatgaaagatccgggtgaaatcataaagttggtgagaaa  
aaactacataatgtttttaccacactttaagctttctattatattcttgaactacatagaatagattactagattgaaatagtagtcaattcaattcttttctactgc  
atccactaatttcaatcaagcaaatgaaaaatccatggaggagagaaaaataatgagaatagactatagtaaaagaaaaaaagtaaaaggaaaaacca  
gcgaatctccatgctaaacatgctcgaatgtttcaaaaagcataaaatatttttaagaactaaagaataagaaaaagataaaaacaaatggaaaatgtcgcgat  
atgtgggaatgctccggcgaagaaaatctaaagttctatgatagaacttttaaacatgggtcgttctagtagcgcgattatgaattgctctaccgctcttctatttc  
tattttctattcttctattctatagtagaatagaaatgaaagaatagaaagacttttctacaagagtttcttacaggagtgaacaaaaatgaaagaaagagagaa  
agaataaagttcggcaaatgtaaatgcaaacggcaatfaaaagaaaagagttgatacaacaattcgaactactcaatcaattagtagtaccatgagttccact  
ccccactactactgtgaaagagaaaatgtaaaagactaccatfaaaagcagcccaagcgaactactatctccatgtaaaatattgctccttttctatgaaaggaaatatt  
ctactattgatgaataatcatagtagaatcaagggtacagagcaaaaagggttctgacctaagcgtatgatgaatcagttcaaaagaatttacttcaacaaatctt  
agagtatttctgtagaattgggagcattaaagtataatgatacatagcccttcttataataaaagaataaggaacgctatctcatccctattggtatcggttgg  
gccactactgtaaaacaaaccctggttgggaaagaacggtgggttctcaaatccagatcggcagccttgtattcttggccccactatgctggggtgcaa  
atgtctgattgtagcagtagctataagccctaaagtatttattgatcaggcggcaccagattgaactgggataaaggattgcaagctccctgcttaccgctggcca  
tggcccaaaaaatcagatcaaaatcagaaaaagcaagattcctccagtttctactaaaactaacttcttttcttfaaactaattctactactttttccaatctt  
ttcaaaaaatctattcattgcttttttggatccagtttgcattatctctcaaaaggattctatctaaacacacattgtaacactagaaaactccctttcttctattgaa  
atgaaaaagagaaaaagtgatttctagtcacaagctacaaaataagaacaaattggaaccataactagaattctttttatttgaatttcggtattctctccgcct  
gccattaatggcataaaaaagacaatgattatgcctaaccgtataggttaaacccaggtccgaacagcattatctatgtagatcccccttatgacatactct  
gtggagaatcgtcttaattttctattgcaataaatatctgaataaaaaaaagaaaattgactttgctatgtggaggtccagaactagattggcatgactaaataaagt  
acttactttatttagattctacaacgaatctatatttataatattatagaattctactactacgaacaaaaaaagaacctcaaatcttttgaatfaaactaagcgt  
gctattctcaatcgaactaaagcaacttctagcttataaattattataatgtttttatctcattcagaaagggagaaaaaatgagaatctttgcccgtccaatc  
gaatatacaaaactgtaagtggcagaatttttgaggttctaggaatgtttataccttatttctcatttggacccctgggaatcgaactttctggaatgtct  
ctattcatatgtagaatacatatagaaatagctatgtggagttcccagaatctcatgtgatttagtaaacagaatatagattccataattgctagatcgtatctgtaggg  
atgtagaagagtgagctgataatggaatftttctgataaacaggaaactaagattaagatgctccggaatgaaatgagggaatgcccacaataccggatgtag  
tcagatccaatcagggtattttaggttcattaaatcaaggctggcagaagaactgagaagttccaacaataaagatccagatcacgaaatctatttcaattatt  
gcgaaaggatcaattgctagaacctcgaataaagaaaggatgctgtgtagaatcactacattcttccgaattatcagatccggcgatgaatftttggttct  
gatgtgcaaaagcaaacatttctattggaacattctataatgaattccttaggaaccttataataatggaatataccgaattgtagaatcaatattgctaaagtc  
ctggtattactaccgctcggaaatagaccataaaggaaattctatctaccggactataatcagattggggaggaagatcggaaatgcaattgataaaaaaga  
aaggatattggctcgcgtgagtagaaaaacaaagatactattctagttctatcagctatgggtcaaatcaaaaagaattctagataatgtttctaccctgaat  
ttctgtcttcccaatgctaaggagaaagagaggattgagtcaaaagaaaagcattttggagtttatcaacaatttctgtgtaggtggggacctggtatttctg  
gaactctatgtgaggaattacaaaagaatftttcaacaaaatgtgaattggaaggttggctcagcaaatatgaatcgaagactgaatctgatatacctcagaa  
cagcacttctgttaccgagatgtattggccgctacggatcatttgaattggaatgaaatftgaaacgggtatcattgacgatgacgatgaatcattgaaaaata  
aacgtattcgttgggtgagctgttacaagatcaatcggactgctcttgggtcttacaacatcgggtcaaaaaactatccgtagagattcatacgtcaatcaa  
aacgactccacaacatttggtaactcaactcaactcgaatttataaactactacgagaccttcttggtagatattcccttattctcaagttttgatcaaacatc  
cattgacacaaacggttcatggcgcaaaagtgattgttgggtctggaggattgacggggagaactgcaagtttggagccgagatattccatccgagtcactat  
ggcgctatttgcgaattgacacgtccgaaggaatcaacgttgactactgtagctttatgctattcatgagaaatgattcattggtggggtaccgtagagagtcatt  
ttatgaaatattgagaagcaaaagaaaaaaagagagacaggtggtttattatccaaaatagagatgattattatgatagcagcaggaaattcttctctg  
aatcggggtattcaggaagaacaggttgtccagctagataaccgcaagaattcctgactattgcatgggaacagattcattgagaatgattttcttccaatatttt  
ctattgggggttctctacttctttattgagcataatgatcgaatcagcttattatgattctaatatgcagcggcaagcagttccgctttctcgggtccgagaatgcat  
tgttggaaactgattggaacgcaaacagctctagattcaggggttctgtatagccgaacgaggggaaagatcatttctactaataatgacaaagatctttatcaa  
gtagtggaaagactataatgattcttttagttaccatcggcgtcttaacaaaacttctgtagcacaacaaactcgggttccgggggtaaacatttaaaaaag  
gacaaattttagcggaggggctcgtacgggtggtgggaacttcttagaaaaaacgtattagtagcttataatgcatgggaaggttacaatttgaagacgcag  
tattaattagcaacgtttgtagatagggatatttacttctttcacatccgaaaatgaaactcagacggatacaaacagcaaggtccgctgaaaaatcacta  
aagaaatcaccatctagaagaacttactccgcaattggacagaatggagttgtgaagtgggtcctgggtagaacagcgcgatttttagtaggtaaaat  
cgctcagatagcagcgaatcgtcctatctcgggaagctgattattacggccatatttggcttggagtagtccactcaaaagaaacttctcaaacaccgat  
aggtggaagagagcgcgttatcgtgaaatgtagccagggatccctcgcacataatggttcgtatataatttcaaaaaacgcaaatcaaaagtgggagata

aagtagccggaagacacgggaataaaggggatcatttccaaaatfctcctaggcaagatatgccctatttgaagatggaacgcctgtgataggtttcaatccctt  
aggagtaccctcccgaatgaatgtgggacaaatattgaaagctcgtcggattagcaggggatctgctaaagaacattatagaatgaccctttgatgagagat  
atgagcaagagcctcaagaaaactgtgtttcagaattatagaagccagtaaacacaaaaatccgtgggtattgaaaccgagaccgggaaaaagcag  
aatatttgatggaagaacaggagaccctcgaacagcctgttctaataagggaagctctatctttaaataatcatcaagttgatgagaaaatccagcagcctc  
actgggcccctattcactgttacacaacaccgfttagaggaaagccaaagggggacaacgaataggagaatggaagttgggctttagaagatttggg  
gtgtcctatatttacaagagatacttactataaatctgatcatctatagctcgcgaagaaatactaacgctacgatctggggaacgagtacctaaccagggat  
cctccagaatctttcagtgctgttcgagaactacgatcttggctctagaactgaaccattcctgtatctcagaagaactccaggttaaatagggaagaaattgat  
cggaaataataaaatctttcttattttatgattgaccaataataaacatcaaacactcaaatggactcgtttccctcaacaaaataaaggctgggctaacaaa  
acactacctaattggggaagtcgtggcgaagtcacaaggccctccactttcattataaaaccgataaacgaaaaagatggattgtttgcaagaagatcttggg  
ccataaaaaagcagaatttgtctgtggaattctcagcgcagcggagctgaaaacgaagacgaaagatttgcacaaaatgggagtagaatttgtgatctc  
gatacgaagatataaattgggatacatcaaacctgcacgtccctgactcatgtgtgattttaaaaggctctcctagttatcgcgaatcttttagataaacctttaa  
gaaattggaggcctagatataggcatttctttgctaggccagtgctaaaaaaccaactttctacgattacgaggtttattcaggagatgaaattcactcgtaac  
catagcatttccccctttttctaccccaggctttacaacattcgaatcgggaaattgcgacagcagcaggtgctattagagaacaattagcagatttggattgca  
atttttttagaattcctcggcgaatggaaggaattagaagacgaggggtatagtgagatgaaatgggaagatagaaaaagcgaataaagaaagtttttggatt  
agacgcacgaattggcgaacattttcaacaaatgtagaacgaatggatgttttggcttattaccagttctcctccgaatfaagaccattgtttataggt  
ctggggataagtagtgactcggatataatgaactttataagagattaccgctggaacaacaacttgcctatctataaaaaagagtaattagcgcacgaga  
tttagtaattgtcaggaaaaattgtacagaagctgtgatacactctgatagtggtcgcgggcaaccaacgagggatgtcacaataaaatatacaaat  
cactttcagatgtaattgaaagtaagaggggaggttccgaaactctgctgggaaacgggtcgaactcggggcgtctgtcattgtgtggctccttca  
ttacataaattgtggftaccctagatagcaataaagcttttcagctattgtaattcgcgattaatcagaaacgtgctactcctaattgtagattgcaaaaggaa  
aatttgggaaaaaggaaccattgtatgggaaatactcaagaagttatgaggggacatcctgactgttgaatagagcaccctaccctgcatagattagcatacagg  
ctttcaaccctatttagtagaggggcgtactattgtttacaccattagtgtaaaaggttcaatgcagactttgatggggaatcaaatggctgtctactccttacc  
ttggaagctcagcgggaagctcgtttacttatgtttctcatagaatctcctatctcccgtattggggaatcatttgcgtaccaaccaagacatgcttaccgacttta  
tgtattaacgattgaaaccgtcaggtatttgcacaaatagatataatggtcggaaactatccaaacaaaaagtaattacaataataaatacctaaatgatacga  
aagataaagaaatctcttttctagttcctatgatgactgggagcctatagacagaacaactctgttagacagtcctctgtgctccgatgaaactagatcaacgc  
gtcattgggttaagagaagttccgattgaagtcaatatgaatcttgggacttactgtgagattatgccactatctagtagtgggaaatagaaaaaggaatccg  
ttctatatacattcgcaccactctgtgcatatttctttatagagaatagaggaaaccatacaaggatttagcagcctatcactatcaaacaggaaagtt  
gattcggggatgcccttccgagggcattccgattcgtagtatcatcttttccgcacgaatccagattgagattgaggaaggaagtaactaaagtttccgaat  
cactgactcagccattgtcgaatcctactcagcaattgtcgaattatactcagccgaaaaaaggggacttattatggcgaacgggcaatctgtctttcata  
ataaagagatagatggaactgctatgaacgacttattagcagattaatagatcttccggaatgggatatacctcctatgctgatacaataaaaaacgctgggctt  
ccatcaagccactactacatcattcattaggaatcaggatctttaaacaatccctcaagggaatggttagtccaagatgcggaacaacagagtttcttttggaaa  
aacactattatttggggctgtacacgcggtagaaaaattacgcaaatccgtgaaatctggtatgtacaagtgaatattgaaacacgaaatgaattcgaatttccg  
ataacagatccttcaatccagctatctaatgtcttttcaggagctagaggaaatgcacgcgaagtacaccaattagtaggtatgcgaggaatagcgcgacccca  
aggacaatgattgattacattcaaaacatttacgcgaggacttttggacagaatataatcttctgactcagagcccgaagggggttagatactgctg  
tacgaaccgcccggatgctggatattacacgtagactgttgaagtagtcaacatattattgtcgttagaagagattgtgactatccaagctatttctgtgagctc  
aaaatgggatgacgaaaaacttttgcacaacattaattgtcgtgtattagcaaacgatataataatcggttcaccgtgactgccactcgaatcaagatattgga  
attgggttagtcaatcattacataaccacttccgagcagccattcgcagacaacaatataatagaaccccccttacttccggagcacaactctgtgatctgca  
attatgtatgtcggaggtccactcatggcagatctgtcgaattgggggaagctgtaggtgtattgcgggtcaatctattggggagccagggactcaactaacta  
agaactttcactactggtgggtattcacagggggtactgccacctgtacgatcccctcaaatgaaaaatcaattcaatgggatttgggtcaccacacgta  
cccgtcatggcagcctgctttctatgttatagacttgcataaactattcagagtcaggatattctacatagtgtagtacttctcaaaaagcgttattctagtcaa  
aatgatcaatagtagaacccgaacaagtaattcgggaatcgtcgggaacgtccgcttgcattttaaagaaaaggtacaaaaacatatttccgaatcagatg  
gggaaatgactggagtagcattgtttatcagcggcgaataatcaatgtaattctcgtcattacaaaaaacagccatttggatattgtcagtaagtagtgc  
agatctagatagcttcttttccctccacaaggatcaagatcaaatgaactattcttctgtgacggaaggtatattcttggcctcctcgtatggctgatgaggt  
aagacatagactgttgatacttttggtaaaaaagagaggaaatcttattcaacgccggatcgaatcattgtccaatggctattggaatfctgtatccttctatt  
cttcaaaaataatttggattttagcgaaaaaagcgaagaatagggtccattccattacagatcatcaagaacaagagaagaaacaaatctgttttggatttccg  
attgaaatacccttattgggtgtttacgtagaatactatagttgcttatttgcgacccacgatacaaaaaagataaaaaagggttcaggaaattgttaatttagata  
ggaccctagaggacgaatataggactcagagagaagactcagagaacgaatcgggagcccgaaaaacgaatataggaccggagaggaagatgtaaaacc  
ctagaagcgaatataggactcagagaggagatgaaaccctagaagatgaatgggatccagagaacgaatataaaaccctagaagatgaatggaat  
cctagaggacgaatataggactcagagagggaatccgaggacgaatgggagtcagagaacaatataggccccgagaggataaatatggcactttagag  
gaagactcagaggacgaatgggactttagaggaaactcagaggaaactcagaggacgaatgggaaccggaggaagattccgtcttaaaaaagggg  
gttttgattgagcagcaggaacaaaagaattttagctaaaatacaaaaaagagtagatcggttttttctcctcaagaactgcatatcttccgagatcctatcc  
ctaaaggactgtacaatagattattggagtgatcacacaactcaaaaaatacaagaagtcggctgggtggattgtcagtgagagaaaaaaaagccata  
cggaaactaaaaatctttctggagatacttcttctgaagagcgggataagatattggtgcagtttgataccactaagaagagaaaaaaagattcgaaggaat  
caaaaaaagggaaaaattgggtctatgtcagtgaaaaaaatctcaagagcaaggaagatttttggtttggctcgcactcgcagctcgcgatgaaatgaacgaag  
gggaaatttagcaacatttccacaggtcttgcaggaaggggtaattcctcaactcactgtcaattttattctcatgaaatagcaagtaactcaagaa  
ttatcatacgaatagcaattcgtcgaacttcttagattgaaatgggaacaagaagaaaaagagaggcctcgtcttccctgttgagataagagcaaatggtctg  
attcgcgatttccaaagattgggttaatacaatccactttctgtatacacgaaaaaggtatgatagcagaagtcagggactgattcctcataatagtttagatgcac

caataccaatfccttttccaaaggcgaagattcaatcacttagccaacatcaagaagctattggtaccttgtgaatcgaataaagaataccaatctttagtggtttg  
tcggcatccaactgttctcgaattggttttttaagaatcaaaaaaccatggggtaaaagaatcgaatcctagaatcttaccaaaattttgggctctttcga  
ttttcgggactcttaggtactattgcacctagatatacgaatcttctctacttacttactaacgtataatcagatcctgttaaaaaagcattgctcctgacaattgaa  
acaaaactcaaaagtactcaagacttaaacacttfaataaatgaaaatcaaaaggacttcaaatcagatgataacatcatgttgatccattccagttaaattggca  
ctttcctcatgattctgggaaagacatcagcaaaaatcacttggacaatttattgcaaaaatgtatgtctatttaaatcgcacataaaaaaacaggtcaaatf  
tcattgtaaatatagattcctttgtataagagcagctaagccttattggccactacaggagcaactgttcatggtcattatggagaatcctttacaagggggataggt  
agttacgtttatatacgaaaaagcagatctagtacataacgcaaggcttccaaaagtagaacaatctcgaagcgcgttcaattgattcactatcggcaatc  
gaaaggagaattgaggattggaatgagcgtataccaagaattcttggggcttgggattcttattggaagctgagttacatagcccaagtcgtatcctttgg  
ttaataagatccaaaagggttatcgtatcccaagggtacagatccataatagacatataagatattatatacgaagtaacatcaaaagtcgggttccgaagatg  
gaatgtcaatgtttttcactggggaattaattgactattgcgagcagagcagcagggcggcgtttggatgaatcgtatattatcgggcaatcttattgggaata  
acaagggtttccctgaataccaaaagttcattatctgaagcaagtttcaagaactgctcaggttttagcaaaaagctccttacgaggtcgtattgattggttgaagg  
cctgaaagaaaacgtatgtctgggggggattatacctgttggaccgattccaaaaattgtgcaccgttaccacaagacaagaacctttattcgaatcaaaaa  
aaaaactattgctcggaaatgagagataattttctccatacagaattgttctctgattcgcgtaacaacaattctatgagacatcagaatcaccattac  
ccatttatatgattaaaggatacataaagcagatttttacttfaactagattttgacctagaacgctaagaggttagattttctatttttaatttaaaaaagattta  
gttaattcattaaggttatcttatacctatgtagaagggtccatcggacaattattattttcaagctatttcggctctttcctaactcgaagaaagaaatcgtaat  
ggaaaggtagatgaaaaaaagaaaaatcaaaaggaggtgtgaaaaaatgacaagaagataattggaacatcaattgaaagagatgatagaagcgggag  
ttcattttggtcatgtatgaaatggaatcctaaaatggcccctacatctcggcaagcgtaaaaggtactcatattacaatctcgtagaaccaccggtttttatc  
agaagcttattgattttttgattcagcgaagtcagggaaaaagcttcaattgttggtaacaaaagagcagcggatttagatcagctgcaataagggct  
cgttgcattatgtaataaaaagttggtcagtggtatgtaaacgaattggtcgtacttaaaactagactttcctaatttagaactaaagcagaagaaagattggaa  
aaattccaccatctcccaaaaagagatgtggcaatcttgaaggaaaaattatctacttgcgaagatctcggcgggatcaaatatagacgaggttgcctgacatt  
gtgatcgtcctgatcagcaaaaagagtatatagcttctcgggaatgtgccattttgggattcctactatttcttagccgatacaaatgtgaccagatctcgcgaat  
atctgattccagccaacgatgacatgactcaattcgttattcctaacaattagatttgaatttggaggccgttctctatataagaatcattgattaag  
aagaatagtaattcttggcaactgcgtagatttgaatcactactattctttttgtttgcatagaaaaagacggggaatattgatataattagagggtattgata  
tatattatcatctgatgtatttctgatacctaataaagatlaatacttcacgttctgagttgagaaaaagatggttgaatcaaaaatcttttttgaattcattttt  
atcaggggacaatataatattatcctgttctcaataaacactcaagggttatacagatatacgggcgtagaagtaggccaacacttctattgcaaataggagg  
ttccaaatctatgccaagacttacttcttgggtcgaattactatcttctgtagttcagttatcagctgttcgcaatccacaaccatcccaaccgatggtcag  
aatttctcgaatagctcttatttattcagacttaagcaaaactcagattggagaagaatcggctcctgggttccctttattggaactatgttctttttttttt  
gaactgtcgggtgctcttttaccctgaaatattacagttaccctcaggaattagcagcggccacgaatgatataaatactactgttctttgactttactcagtc  
agcggcatattttatgctgggtcttagcaaaaaggattgatttctgagaatataaataaacactcaatcctttaccatcaatattagaagattcaca  
ccattatcgttagtttctgactttcgggaatataatggcggatgaattagctgttcttcttctttagtcccttagatgttctataccggatcatttcttggattat  
ttacaagcggattcaagctctatttttgcacgttagccgacgtatataagtgaaatcattggagggctcattgaattgactatttcaaaatagcttttttttagc  
ttaactcaattcagatggttgcggaaaattcgttggttgaaaacaaaatgtaagaatttgcgtatgaatatacaatctagattgtagaagagagaatagctata  
ttacggaattgccaacaagatataagcattagggagggcggagtcaggctagatctatacctttatgtctataagttcagtcactttttgtattgggttccacttta  
aggaaattttttgaatccgattcaatgaaatgagaaaatcacaacaaaatagaagaacaaatgatattggatattatattcccaagttagattcattatctaa  
tccgataatggaatccgattccatcaatcagatgcagcatattgttcaattggatattgattaaatctattggactggattaggtcatttccataggggttct  
tctctatttaccctttattatgaattagatgatagggaaaaaatagaaactcaaggatcgaagaggaagaaagaaaggaatgaaatgaaatcagttggttgg  
aaagaaagagaatagaataatgatacacaaccttaatgattgaaactaaaaaggagatctgaagcagttcggagaattcagattatcgttcaattgtactt  
tttagttacttcttccaatagactgaaatataatgaattcttgggttattgataccttaaccatttctttttttgacacgaggaactcatatgaatccactaattgctcgt  
cttccgttattgctgctgattggccgtaggtcttcttattggcctggagttggtcaaggactgctgcaggaacagctgtagaaggtattgagacagccag  
aagcagaaggtaaaaacgcggtactttattgcttagcttagctttatggaagcttcaaatatttagactattgtggcactggcgtttatttgcgaaccctttgtt  
aatcctaaaaaagaaaacgagctttagattagatacttcttcttttttagtaaatggatttgccttgcgaattcaattatatacaactttactcctaatttactccta  
gagtttctattttatggggacagacaataccccaccagggaatagctgatttggagatgatcaatttagagatattgctccgcttctgcttcccgcctttgtttaggg  
tagtggaaaagtattttcttttttttaggaattttgggaacttcaacaaggaggtctttcacaggtcaaacgagatctaaagacttaactaaaagaatactaaatt  
gaatctatttctataaaaaaattgcattaaaaaaaccgatcaaaaaggcgaagtaagtgtatcgaaaaactttgttcttctgctctatataagaggaga  
gcatatgaaaaatgaaccattcttctttttttagctcactggccatccgctgggagtttctggccttaataccgatatttttagcaacaactaataaatcaactgtag  
tgggtgtgtattgatttattttgaaaggaggtgtgtcgtgatttcaagaatagattggatctatccggctgcactttagaatatttttagtattttcgaataaat  
aagaaaagggtgcacgatctcgaacttctgaataaatgcagaatcatalgaagaaccatagcatttccgacatttggtaaatcaaatcaactttgattct  
ctatagaccaataatagaccattaacacggttaagctaaactgcttgaagcttaggcaaaaagggttacttctacaactatattagattagaccatgctt  
taaacggaatagctaatgtaaatctctgatatagaactcatalcagataaatggttgaactattactagaaggggcaccctgccctttttatccaatgccg  
aatcagcactatgataaaaaagagaaagttttgatttgaagaaaaagtaggaattctatcatttccattttctatttagttttcttaataaattgaa  
atfttaactaaaggcaatacaataaaaaaacacttctgcccacgatagattttatctagcgggaagagctccttaattttatctagcttataatgggttccggt  
atattgaaatataaacagaaaagagagggtagagcattacattaaaaaaataggaagtagccatagcaaaaaagaaaaaggagcgtgagag  
ccaaatgaatcgaagattcatttgggtcgggaagagatcaaaaaggttgaacttaataagcaagtaattcatttcaaaaagatttattagataatcgaaca  
gaggtctttagtactattcgaattcggaaagattcgttagaggaaccattgagcagctcaaaaagctgaattcattacaagaagtcgaactagaagcggat  
gagtatcgaatgaatgatactctgagatagaacgagaaaaagcaaatgattaatgccacttatttagtttgaacaattagaagaagtcataaacgaaacccctt  
atfttgaaaaacaaggcgtgaatcaggtccgacaacgggtttccaacaagccgtacaaggagcttaggaactctgaatgttggtaaccaggttacatt

tccgtacgattcgtgtaataattagcattctcggggccatggaatggaagagttaaatfaattagccctgaactctacttctctttagaatttaggcattatfttccctt  
gcttccgaaaaaaatagtaaaagaacactaatggcaaccctcagatcgacgaaatcataaattctccgcgaacgtattgaacaataatagaaaagtaggg  
attgagaatacggctcgtatgtcaagtgggggatgggattgctcgtattataggtctggtgaaataatgacggcgaattgcaattgcaagaaggactagg  
ggtattgctcgaattggaatccaaaatggtgggattgtattaatggcgatgggtgatgatacaagaggcgatfttgtaaaagcaacaggaaagattgctcaga  
taccgtgagcgaggcttacttggctcgtgtataaatgctctgcttaaacctattgatgggagagggcgaattgtagctcggaatctcgttaattgaatcctgct  
ccgggtataaattccaggcgtctgtatataaacctcaaacggggcttattgctatgattcgtatgattcctattgggcgcggtcagcgaggaattattgggga  
cagacaaccggcaaacagcagtagctacagatacaattctcaatcaaaaaggcaagatgtaatatgtttatgtagctatcggcgaagagcatcctccgtag  
ctcaagtagtaactattccatgaagagggggccatggaatacacattgtagtagctgaatggcgattccctgctacattacaatcctcgtccttatacggg  
agcagccctggctgagatatttatgtaccgcgaacggcacttataataattatgatgctcctcaaacaggcacaagcttatcgcaaatgtcccttctattaagaag  
acccccggccgcgaagcttaccaggggatgttttattgcaaccacgccttttagaaagagccgctaaataaattctttagggggaaggaaatgactgctt  
accaatagttgagactcaatctggagacgtttccgctatattcctactaatgtaatctccattacagatggcaaatattcttaccgagatctattcaatgccgaatt  
cggcctgctattaatgtgggtattccgtttccagagtaggattccggctcaaataaagccatgaacaagtagctggcaaatcaaatggaattagctcaattcg  
cagagtacaagcctttgcacaattcgcctcgtctcgtataaaacaagtcagaatcaattggcaagggggcagcattacgagaattgcttaacaatccaagca  
aatcctctccagtggaagagcagatagctactattatatacggaaacagggatacttattccttagaattggacaggtaaaagaaattctgtaggtacgtaa  
acacataaagatacctaaactcaattccaagaaattatctctagcaagacattaccgaggaagcggaaatcctttgaaagaaagcattcaagcaaacctga  
acggtttccctcaggaacaacataaattttgacgtctactctgttagtagaagtagtagaggaagaaatcgtgagaagattttcattgaaatcgaaaaaag  
tttcttagttttagtagtagtttttaagaatagatagaataagattgcctcaataggattgaaactatacgaaggttagaagacacctgtcctatccattagcaa  
tgagcgtttttcatatcttcttcttcttcttcttcttcttcttcttcttcttcttcttcttcttcttcttcttcttcttcttcttcttcttcttcttcttct  
atgcatatataaagaaggaataggagcgggtagtgggaatcgaaccggcgggtatgagcctgtcagcttaccacaaactgtctatcctgttaaaacta  
aagagaggggaactagtggaataaagggggttgaatagcccttaccatcttatacaaatagaatgctcattatagcaatggttaagagggccttctac  
gatcatcaattccagaatccatacaaatagaaaggtattttatccttaccactggatctgtgaccggtaacaacatgcataaacatttctcgaagtatgtg  
tccgtagatcccaagctcgtatgtagcttagcttccggctcaaaaacaacgtcgtgaagcgtgctggctcactattacgtggcagggttgcattttct  
cgatttctgttttctactcaaaccaagggtaactttgcttcttcttcttcttcttcttcttcttcttcttcttcttcttcttcttcttcttcttcttct  
aatcaaaccttttttgcataatgtgcttctactatctaccaagtatacgggtctaatcttagatggaaaaataatagaaaaagaaatctaaagaggggatcctc  
ccccctcaacagagtaagtaactaggtactgatacagfacaacaaatfaactaaatfaacaaactgctctgattgaggcaatcaagaaagcggcataagtg  
atatataaccacggaaaagtgagtaatcccacatcttcttgcacaatggaagagccacggccttctcctcagcaattaaatagcaaaaggtgctcgt  
catgagccatgctaaagctcaatfaattcctgcaaatccacggcaggaaatgaacataatccagtcgccaacaagatgccaataagaacatccac  
gcccataccgataactattcatccaaaaggattataccattgataaggtggaaggttaaccataggaatccttaccatccatcaataagtgaggattca  
ttaaattgtgaaacgtgctcctgcccataatgtgatgtttccaatgcaataaaaagtaaccatcccaatggtatttaacatccgaaaactgccaataaaacgcgtc  
ccaagcagaatatacagaatgaccgccgcaccaggggcgtcgaaggaactatatacaaatccttttaccggcattaaattggaaccgcgtgcatcctaaag  
cacccttactaaaatcaatgtagttagtcaaacctaaagcaatgcatgatgaaccaagaatcctcaggctcattgttaagaaaagcgaattactattctcgtfaa  
cagcattcaaccatccgggtaaccatagggttgaccgcattgaaagcgggaccgctcgttgaagataagagtatatcgaaccatattgcttaccatgagcc  
gattgatccattgagcaaatatagggtgatcaagattgctttctgaggaccaaaagcaagcatgacgtcattatgaacataaaggcccaaggtatggaactca  
ggaagagactagccaacttaaatgagatgtagcttctttagtctaacattcttccaatacattcctcattctgttccggattgtaattctaatgaaaaaata  
gtccatgagcaaaagccccgtcatgatgaacctgcaatgtattggtgatgagtagataaagctgctgagtagtaaaagtcttgcctatgaatgataagaagta  
aagagtacatattgagctactaaggaagtaataaccctaaagaagctagagcaagacctaattgaaaatgaatgaattattgattgtcgtaaagccccattg  
cccacggcctaatcgaacccccggaggatgtgcttctaaagatcttgatactgtcccattccgaaggttagtcgatacatgaccggcaatgagaaaaat  
aaatgcaatagctaaatgatgatgcaatcggcagccacaaactgtgtttgtggtggaatcccccaagaaggttagaataagcattcccgtcctgagt  
ggtaccaataaatgattactgaaatggggtttgggcataaaagattccactgaccgtcagaaggggtccaaccctgtgtagaggtaatacatctaaagaaat  
attccatgaaactactctcccgtgatgtggaatagcagatgaactaaatgctcgtccaagccaagaacttaccggcaaaagcctgacaataatgatattga  
gacgagattccggttttgaaccacgaaagcgttgggttccatttgggttgaatgaaccaacccttataaggtatggtagaagaaataatagaaaaagag  
ctcctgtataaagatcttcttcttcttcttcttcttcttcttcttcttcttcttcttcttcttcttcttcttcttcttcttcttcttcttcttcttcttct  
cttccacagcgggtgaccaaaatgagatcccaaatcgatgagcaatggcttcttcttcttcttcttcttcttcttcttcttcttcttcttcttcttcttctt  
gaaacagattccggactccatagaaaatgattgtaattgcccagaaggaagcaaaaatgttctgataaaagactcctcagtaatatcatcatgacttctgaa  
atcatgtcggtagcaatacaaaccaaacatcagcagtagtgggctcctgagctaaagccttggctaaacctgggaaacttaattccataatgcttcaaacctc  
ctagccactatcctactgcaataattctcgttaagaagaatgcccattgttggcaattccaccagaaggaatgggttactcctacagcagctcctgtataatgctc  
aaggctctaggctgagtagcaggagcaacttttaattgttatgagcccaacgatagattcaatcagttcttccaataaccacggcgtgataaaaaacattaaac  
tgaagcccagacaaaatgagcactaagaaaaaagaccatagcggataatgaagaaccataagactgaattactgggatgctgtgccacaagaatctc  
ggagccaccattaatgtaatggaactctgcaaaattccctctgtagatgagttaccacctgatacttatagtacccaacatccgactgacttttccaa  
ctgaaatgaaaaatgactaccgaaatggaattgtacatccagaatagacctaagaaaacatgatccagcgggatactgacatgtccccctcggcagcccat  
cgcaagggaagcgaaaacaaatgttcttcttcttcttcttcttcttcttcttcttcttcttcttcttcttcttcttcttcttcttcttcttcttcttctt  
gctgaaatgtgatgactaaaaatctcggctcctaatggaatgtaacaagcaactttgccgctactgctactaactgccacctccccactgtaagctgta  
cttgttggcaccaggagctgttacgtagcgcgccagcatggagattgtaccattgagcaaatcgttgaattgtatggcggtatccgaaaacatattct  
ggggacgacctaaagcactcatgtatcattatgaatgtataaaccaaaactgtgaaaactgaaatatacaccagtaaggtgggagatgattgcatcacggt  
gctaaaggacgatcaatagatcgttgcagcgttggatcatgtcttaccataaaaatggctgcatgtgcagcagcacaactattagaatccgcaat  
ccacatgtggtgtgtaacaaggaaagttgtaccatagtcagtagctaggtatggatagggggcagatgacatgatgagctacaacaatggtgtagagc

ctagcatagctaggttaagataaftgagcatgcatgacgttgtagattcatagagacctttatggccctgtctgtaaatggcctttatgagcctccaaaat  
ctttcaggccatgaccaataccccagttggcctatacatatgacctgcatcaggaaaagaatgcaaatagctaaatgatgggcaaatatgctcaaccataga  
ccgccgttattggatctagcctccgcaaaactaagaaatctgctgattggaccaatcaaggtgaaaaagggtgctctcggcaaaactaggataaagt  
tgagccaaaaggtcgattcaagataaattcatgaggaaatgtatctcttaggatcaaccccagctcaagaaatgggtaaatggtaaaagatacatgattgg  
tgccccgccaaagagagaccaagcttaataacccctgtaagtgatgattcaaatgattctacgtcttggaccaggctaatggggagcggcttggataa  
tggaaccccagcaaaaagcattaacgatgcaaaaatcaatgcaccgattgcggtacaatagattgtaattcactagtattccgagctcggcaaatcga  
aaccggagggtattggattcctcggaaacccccctacatcaccattcaatatttccctacgattggccaaactacctgagcactgggtccaatgtagtag  
gatcacttagccatgctcataattggaaaacggccaccatggaagtacatgccactcaaccaaagaaagataatggagagttgaccgaaatgagcactaa  
ctttcgagagatctctccaatcactgatgactatcgaatcgtgagcatcagcatgtaggtccagatccaagtggtagtatcaggcccttagctattgtctg  
agaaatggccgggtctggcccattcctcaaaagatgttttacaggatccctatccacaacaattttacttctgggtccggcgaacgaatcatcattagtccctctt  
ccggacaagacatacaagagaccgccaacttttagtgaaactttgaaagatagatattatgattagccttttctactatctaccgctcttattttttatgattc  
actggagcaattatattgaagcactctgaggaaggttcgcatattatgacataaggattgggtccctaacggactttttatcttggatttccacgtaacaa  
aaaacttttttaattaaaagctagctatttttttaagataagtcctatctatactacttcttgagcataatagattttttattcattcgaatccaagat  
aactcattagaattataaagatggtcctgatattagcaatattatgtccctttttactgctttacttctttagaccctatgttatccttatgaaatataa  
taaaatagaaggcagagaaagagataatgaaattctgattcgtacccgacctaatttttattgattaatggatcaacaacccccatttctgaaaaagga  
gagtggtcttattcaaatcaaacgcttctgaatctcaaccagttctgtcctcaataaattccggagtaagcctatagcttggccaataactcagcagctgac  
aaaccaagcttctcaattctgaatcaccctgtagaatggcctgcttcccccggctggaataggtagtcttccctgaaccgacttgagagttcctacctacac  
ggctcagaattgctatcaattccttgaatccttcttaactgaattcgaataatcgaatccttcttgggttaccgaagaaagtaattacctaagttcaaac  
cctaaaatttgatcaataatcagttgacttttccaccctgcagaaaaatgaagcatagatagacccttatccttccgtccgaatttgaaggttaactatcggttc  
atataagaatttctatagaatccttgaaaaagacttttcccataagcaagaaaaagaaactactatctttgggatctgactactaccggctgttaactccttagtg  
atcggctctattacataagcggattcctaaatttgccecatatcagggaataagtaagcagttttttatggtatcgaaccagtcggctactaattgatctttacg  
tctctatcaattgagaactctatccatagagtagtataggccacttcttctcctatattgattctcgtgaagtgcttcttccctacagctgataggcaaaactg  
gtttgacgatccctatgtagaaagcccccttctagtaaaactagaaaattgatcttcttatttttcttctatagtggaagatagtcgacgtaatgacagatcacg  
ccatattataaaagccttggtaagaagggttctgtctgcccggaaataatccaaagccttggatgctctcaltgctgtgtataaggcctatgtag  
agtatataactcgtatagggatcaattctatgctcgtactataaatttgaaagcctccgcaataattcctcggattgagccaacatccgttacggctgtc  
gttctattcaaaaaatcctcgttcaaacgctacatgagtttccactcatalcggctcctctctgtacatagactaagcgaaaaaactagagaataaaataga  
attagttcattctattatggaccgaaagggtggtattttccaaagaaatcttagccaaactcccaagagggttttctaaccaatgaattctattatgctag  
aggaaaacgatagctcaagaatttcttctcaacgcctctatttagaggaaatgaccactcaacgatcttgatggttataggggatccaaagtacaaactga  
tgggtttggtatcccaaccattctcccagcctgataccaatcaggaaagggttaatttcaaaaagtttctctggttattcctattctaggttagtctttatcc  
cctatgctacctattatgactagtagataggattagcctgtaatacagaacctatcctgtagggttaaccttctgctcaataactaaaaactacaattgaagcatccgagg  
ccgcgtcagtcgaggatacacgacagaaggagtgttagtccactcactcccaagcgtgggttcccttactaattggttttctcgcgcaaccccgcctttc  
tctgaaaaacggggtgtaggtagggcaaaaaaacaaaaaaagagcaaatcaccatctctataataagtaaatgccctttttccccggaggtgtcggaaata  
ttcgaataaaatattgctacaattgagaaggtctatcaatgaaatttccatttatacgggatctaggcataatcccaaccattctatctatagaattctttca  
ttccttcacaaaataacataaaaaaaacaaatcattcaattcttataatcgaatccctatgctcaaatggataagagaggatttctctcagccaaaactctctt  
tccttctggttgacaagaagagatagaaaatattgactaagattgatttcatccacttcttctcaacaacaacttctctatcaactatttgcattttcaaa  
gtcattaatcgtcccataccctatttctattgattgatgggttaggataccttatgcaaacagaatctagggttctttttatcgaataagaagaatttctcattct  
ttctttgggttgggaaacccaaactaaacttttcgagggagcgaattcctagtaaaaaactcctgaccctgaccccttagatgaaaggaaatttctatcaata  
gaacaatggaactctcgcgctgtgtgtgtactgtactgcaggaaatggaaaactcgtattcactcagtttttccataaagattatggaggagatggcc  
gagcggttcaaggcgtagcattggaactgtatgtagctttgtttaccgagggtcgaatcctcttctccggttttcttaattcagcaacgtaaatgattcaaatgtat  
caaatcaaatgacaatttattccagcaataatacaatacttatttaataagaatttctatacaaaactatggtatgtaaaatacacatagaggaaagaacaaaaa  
caaaaaggaaatcctagggttaatcatttctgttaggtgaaatgggaaaatacgaatgaagccttaggtcgaattatgctgggaaagggggaaagggaagaat  
ctatgaaccttccggttttccitaaagttgacgagagtaatttcaactcaactcaactatattttagaccgaccactctacagatttttttactagt  
cctttatattgcaattgtcaatcgtcaatgcttggcaattccccggctcggatgaaagcaatagaatttgaaccagacttttgatcttggattcctctgtagtaata  
atctcggggttgcacgaaaactggatctgactatcaccatcaactaaaatgtctatggttaactaattgcccggcctcggaaatggtgaaacatacc  
taatcgaaaaaggatattatccaacgcattcaagtaattgtagtaaacctgacctgtgaacttttgcctttccagcgaatgacatatactaaatgctgttct  
cagaccataatgaaaacgaatttctgtttctgaaagacgaatcagatattgttcttttccagaatggaatttctttcagattactcggatttaggttttctagt  
gagctcgtgtaaaagctcccagagcggctattttttaaagcaggtcctcgaataacgggacatgaagactcctttttattgaaatttctttacacaatattcattgt  
atffacattacagaatacatcgaattaaactgaattaaagtaaaagataaacagagtaaaactactaaaagtaccacaaaaaatggaatttcatcaaatctgaa  
ttttgtatatafattattttattgtttgtatctagcaaaatgtagggtagaacgacataatagatcctggcttctcatttaattcggagaaaaagaggtattttgtca  
tggaacattgatagaaaaaagccgactatcggattgaaccgatgacctcgcattacaaatgcgatgcttaacctctagctaagttgggctacataacagaa  
atagtgtaacaatagaatattatagtagtaaaatccgtaaatgtcagatcttaatttaattcttagctattaactagtctgaattggaagtctacttagaaaaa  
atactagaactcataaaataaagttagatagattttttgaacttcttttcttaactcgaatcatttttctaaatgaatctattcattctatattgaattgatttccga  
tatttttaattgatagctcggacgaataatcattacatgaaaaagaataataatataatatacgaaacataataaagagaacatcgaatttctgtatttccagcc  
atcattatagactttttgagatattttttttgtatttgcataataatfatgattaatatttcaaggaacatagaaatgaaattgcaattctgat  
tagcaaaaaaaaagaaatgaatcaacgcgtatagtagatttgaatcctcaaaaaaggaaacgctgtaggtggggggagagaaaaacctgggataattgattc  
gcattgaattgcaatacatcaacgatagaatcaattcaatgctgaattgcaataagcggagtctcaactagagacgaaccgtagactacatagagtaaatgaatt

caacgattcaaaaaaactaacaagatggaggaaftgcacaaggaaactcctggctcaagaaaaagaaaatggggatagggcaaatcggtagacgctacggac  
ttgattgattgagcctggatggaaactgctaagtggaacttccaaatcagagaacctggaaataaaaggggcaatcctgagccaaatcattgtttgag  
aaaacaagcgggtctcgaactagaaccaaaaggaaaagataggtgcagagactaatggaaactgttcaacgaatcagtaatactggtgtgtagcggga  
actcctctaaattaggaaagaagggtcttgaatctaatacacagatagatactggcatagcaaacgattaatcacagaactatataataggtcttta  
atcttttttaaaatgaaaataggatgattatgaaatgaaaatcataattttttagaattgtgtgaatccattccaatcgaatattgagtaataatctcaatcata  
gtttcgaatcttttaaaagcggattaatcggacgagataaaagagagtgccattctacatgcaatactgacaacaatgaaatcttagtaaaaggaaaatcctg  
cgacttctaagctgagggtcaagtcctctatccccaaacctctttattccctaactctagatttattcctgttttttattaataggttaagattcaatggaatacat  
ttctttttatfatagtcgcaaggaatgctgattattaactcgaatftaaatattttaaataggctttctgtacaatgcatagactgccccctcccattccaatft  
tggatattgacatagatacaaaactctactaggtgatgcacaagaaaagggtcagatagctcagttggtagagcagaggactgaaaatcctcgtgaccagttc  
aaatcgtgtctcggcacagaaaaagggtctccgaataggattgatacaaatcctcagatgggtgggatacatattcgttaataatagatagatgatt  
tttcatctaagtagataaaactcctaagaggcactcttttctgcaatftttcattttctattccgctattccgacaatattttttattcttcttattcttact  
ttctagttgttcaagtaatgcacgggtacaaggtcgtgtagggaaactctttgagtcataatftttctgttcatacgaaggaaatgaatattgattttccaacga  
aatgaagccctttttgcttagctatctgaacctttgtataatggaaftaataagaatgtaataggattctgtttcatctaggaacagagcgtaaaaatattcctgactt  
gcataaaactggagttgtgtgataagtgagcatgaatftctatcattcaatgagcatctgtattcatagaaattgggggtatatagtccttacgtaaggccagc  
ctatccaacttcaggcattaggatagcgttaaggcgtggatgattatcataagagattccaccatacaaaaatcgcgtcttgaatcggaaacttccaatcc  
agaagacagatgggattctaggattatctttgggcaagactttatgcatacttcttgggttactatataccatactgattctcgtaaagatgatacacgctagctaaa  
gatccaccgggtgcaacgcataagcacatgggaaactgtaataatgtaaccatacatataaaatgacagcaatggaatcccaatcctctgtttttatftgcaaaag  
ctctattcctcgtatgcgaagcccaagatctatgaaccctcattgttgactagccaaatgataaccaacctcgtcgtcattatctgactctcctcttggataaat  
attcgcagttcgaatcaagtttgaatattgacctcttctttttcggcacaagagctcctcctaattcactaattttaggaaagatactggacttttggattgaaa  
aaagttcagaagatgcttaaaagtaggtgattgatagcaatcttctcacaagttccagatttagtactgcccgaacataaagcttggctggtagtaaa  
acatcgattttctttgagatagattcgtactcaactatttctcgcgatactcttctacgaagtttggtagggcactataacagcctctgttttaggtggcgaaccg  
gcaagtagacgtccacaggaatcaactcaactccccgaacgtactataggaatccgtactgaacattccaccagtaaatgataagcctccatagcaatgacgt  
atfttggctcaggcatttctcatataatctcactaaagaggagccattttcattgtactgtaccggctgttaaatttaggtccgttccctaggactgtacttggfacc  
aatccataacgatcaaaagcgaatcgtgacgttataatgaagcaaatcaatgaacaacaactggctacataagaagggccataaactagagagcttgcacca  
atcgaagatcttttagtgaatgaataacggaaatggaaactgtttggcgaagtaggggaaactcaataaaactataactgtcttaatggaatcttttctcttttt  
ttttgtctgaatattcagtaagaccattccaaggctcttttgcctatgcataaactaaaccaactaggataagcacgaaatgaagcttcgataaaaacggat  
atacccaatcgtcgaactcattgcccagggtagagaaagaccgtttccacatcaaaaacaacaaaactagcgaacatgtaatagcgtattcggaaatgtaa  
ccaagccccccatgggtctataccgattcfaactagaagcttctctgttcctcagcaaccggagctaaaagtctgaaatcgaatgctaaaatggaat  
aagcttctattatagaatgccccaaaaatcatattcgtgaagcagaacataaatgtaactccattaatgtggaatagcggaaactgaaatgcaattcaagt  
cagcattgcaattatagaatgccccaaaaatcatattcgtgaagcagaacataaatgtaactccattaatgtggaatagcggaaactgaaatgcaattcaagt  
aagattcatcaatggaatcccactcctttcttttgaattccttctatttaggtatggtggagacataattctatagaacaaaactctctcgttctactttgtctatftt  
ctctagaatctctagaaaaaggaaataaaacgaaaatactacgaattagagcctaattaaagatagctgactaatgtatgcagcctaagtaggagtaattcataaaaa  
taaagaactctattcagaacgtatagctgatttagattaggaatctatagatagataagcaagtaataatactcaacaagaatggaatcgcagatggagaac  
atctgcagttgattgatagaatcattttctttctctctataatfttctgatgaatgagcctctgtaatccttttctctattttatggcgcaggcgcctgtccagct  
ataaacaagtactaataaggaaatgaaaactataaaaggaaactaggtatctctcctaaaatataaaaaaggacataattagggtataccgattcgaaccgtag  
acctctcggtaaaaacagatcaaacggatattatcgaatgattcgaactgttcaagaccacaatcattttttgcatgggctctttatcaactgatagaagat  
cagttagtcaccatagttttctttacggaagataatgagatggtccctgcgctctgattgattattgtattatgatctatctaaagcaatcaaaaggtttcaaa  
gaggattacctgacttaggtctgctccggcctaataatcaacctaagtgaaatagagctctatcgttccgctacaagagttgactatgagactcacaacctta  
aagttcatagaacgaaaagaatftttggaggcccttattcctattaagcctagcattatgtggctggatatttaccctatcaactagcaaatcaaaaaggttctattg  
tttagccactggattggtactgaaactggaactgaaccaactatttgcagggcactgtctcctattctctgaaatcctgaatcctgaatgaaagacattgatttgc  
caagaagatcactatgttcaagatgaatattctctaatagtagaggatcttctgtactgttactataataacataccaataacgaagcgtatttgcataaaaaggatc  
ataatcgtacgaaatgaaagggtctctctttgtgtgataaattgctacttaactcagtggttagatgattgcttcatagggcggagctgattggttcaaatccaatgta  
ggtaggtagtagaaaaacttagatagcattggcctacttctgctcgtactataataatftttctaccctcttccctttttgtatcaactaaaccgttgggtgct  
tcaattagatgggggaatcaataaacgacctgactcgtatcctagctcgtctgagagctaccctcgttcaaccaatttcttctaccctcagcttactcaggttagc  
ttcgctatttcaagtgcctgttagcttcttccgataatgctactaccagttccgcatatttctcaaaatgatgatctcattatcaactattctgcaaaaaccgctcc  
acagaaccgccgtaaccattgatcgttggaggggcttattctcaaggaccatactacagctgtttaaaggggcgtgtttggtaaacgcaatftggccac  
tattagtagataaaatgatttcttactcacaatcccaataatcgttagggagctacataaagatttaatttcttcaatttctctctcttaagttatagct  
ttctgctagcttcatgatgttaccaccaataaaaaagcctgttcggtagggcgtcaatctccgaaaaggattgtaaatccctaagtttctgcaagacc  
aacatacttcccggagaaccgtaaaaacttctgccaaaaaacgggtgtgataagaagcgtcaatfttctgctcttctacagttaacgatcctcctccgata  
attcatccaaccaagaattgcgataatgctcgaagtcttftgtaacgttgaagtttgccttaacttctgctcagtttcaatgcttgcgaacgatccgaggtgt  
aacatagttgaggtgaaatctaaaggatcactgcaggataatcccttggaaagtaactccttggaaagtacggtagtagatcacaatgtgcaaatgtttagcag  
gagcagggtcggcgaatcgtccgaggtacataaacgcttggatcgaagttatagatcccttttagtagaagtaatttcttctgcaagaaccatttctgactaa  
gagtaggtgataaccactgcagagggcatttctccctaataagcagatacctccgatcctcctgaacaaaacgaaagatattatcgtatgaagaagcacgtctt  
gcttattaacatcctggaatatttgcctatgtagggcagtaaaccaactctcactagagctcctggcgttcaatttggccatagactagagctactttgatt  
cctcaagatfttttcaatctccagattcttcaattccataaagatcatttctcagagctccgttccctactccgcaaatcggatagccccctgagctt



tagcaatattgtgattaattccatgatgagtactgtttactactccagctcccccaaatagtcgatttttctccacgccgataaggagctaaaagatcgaccacett  
aataccagttcaaaagatggataattctgtatcactcagataaaaggcggcgccgagctatgaatagggaatgtgcactagfatctacaggacccaattgtcaaca  
ggctccccaaagacgttgaattctgccaagtagctccaccgacaggaaactgagaggagctcccgtcaatcacttccattctctcaacccatctgt  
agcactcatagctacgctcactcatttcttaataattgtgtactcacaagtacattattgttaccgtcagtgctcactcttactacaaagcattata  
aatataaggtaacttcccgggggaaaaagtgacatccagcacgggtccaataattgatcgatccctgtactttttctcaattgtagaaacccgggacgaga  
agtagtaggattgttctcataattatcacataatttcaaaaaaaaggaattatcgaaattttagatttttctgttgaataatgccaaatcaacacaaaaaatacca  
aaaatccaaaagtcaaaaggaaatgaattagtaattcaataagagagaaaaaggggaccagcacttgatttgcctcccaaacgaatccattcaatcgtttactcatg  
gaatgagtcgctggaaagtcaatcaatctttttcatatacatttgccttttgaaacgatttgcctactctacttctatctaggacttgcatacaaaaatatact  
actgtgaagcatagattgctgtcaacagagaatttctgtagtatttaggtatttccactcaaaataagaaaaaggggcttattaagaacttaataaggattagaattgat  
ttgggggtgcgctatactataaaagatatacaataaagatggatttggatcaaatccatggttaataacgaagcatgtaacttaccataacaacaactcaattct  
tatgaattcctatagtagaattcctatagcatagaatgtacacaggggtgacccattatataatgaatgaacatattatgaatgaacatattcattaaacttaagcatgc  
ccccattttcttaagattgatataaattgaatattcttttttaagattttgcaaggttctattacgcctaaccatcatcgagtagaccctgtcgttgagaattctta  
ttcatgattgtaggagggacgtatgtcaccacaacagaaactaaagcaaggttggattaaagctggtgtaaggattataaattgacttactacaccccggagt  
acgaaaccaaggacactgatatcttggcagcattccagtaactcctcagccgggggttccgccgaagaagcaggggctgcagtagctgccaatcttactg  
gtacatggacaactgtttgactgatgacttaccagcttctgtacgttacaaggccgatgctatcacatcgaccctgttggggagggataatcaatatacgttat  
gtagcttatcattagacatttgaagagggttctgttactaacatgtttacttccattgtggtaacgatttggttcaaaagccctacgcgctctacgtctggagatct  
gcgaattccccctacttattcaaaaactttcaaggtccgcctcatgtatccaagttgaaagggataaagttgaacaaatccggctgtcttattgggatgactattaa  
accaaaattgggattatctgcaaaaaattatgtagagcatgtatgagtgctacgcgggtgacttatttcaaaagatgataaaaacgtaaaactcacaccattta  
tgcgttggagggaccgttttcttttggccgaagctattataaacacagccgaaaccgggtgaaattaaaggggcattacttgaatgcagctgacaggtacatgcg  
aagaaatgattaaaagagctgtatttgcgagggaattaggggttctattgtaatgcatgactacttaaccgggggattcaccgcaatactagtttggctcattattgc  
cgcgacaacggcctacttctcacttaccggcaatgcatgcatgtattgatagacagaaaaatcatggtatgcatttccgtgtattagctaaagcattgctgatgct  
tggggagatcatatccacgctgtgacagtagtagtaagttagaagggaacgcgaaatgactttggttttggattattgctgcgatgatttattgaaaaagatc  
gtgctcgcggtatcttttactcaggactgggtatccatgcccaggtgtataccgggtgcttccagggggtattcatgttggcatatgccagctctgaccgaaatcttg  
gagatgattctgtattgcaatttggggaggaactttaggacatcctgggtaatgcacctgggtgcagcagctaatgggtggctttagaacctgtgtaaaagctc  
gtaacgaaggcgcgacttctcgtgaaggtatgaaattatccgatcagcttcaaatggagctcgaactagccgagcttgaataatgaaaagcagatcaa  
atcgagctcagccgtagataaactagatagctagactaagtgataaaatgatagaaaaaggtctaataaaaaagagagaatagaaaatcaaaaat  
cagttacgaaaatgcagtaattcttcttttcttaattgattgcaataaactggctcaatctttttcagattgagccgagtttaaatagatttggatcagatgagac  
ttgacaatcgggattctctattctatataatgagaatataaaggatataatacaataaataatcaatatagtattatcatatgataatggaatcaaatcgcagatt  
tacagaaaaagtttctatttgggaaagaatcaatgacatacaatgacattacagacgtatgacattacccttaccgggtattctattccacttctagatagagaaa  
aaaactaaaggagaatgaatgaaaaagacagagtttgaagttagacccttctaaagactcttctcaaaaaagaggacatttgaacttttaacaggcacaatc  
gtgagtcacaagtgactcgaatgctcgaagaaaagagaattgatttcaaaatgtagaactagatgacgaagtttctataacctgatgaagaggtagtttagt  
ttacgactccgatcaagagcgagaagcttctcattcagattggactgctatagaatctggaccatctgtagagacgttcaaaaggctcctgatgataagaatcact  
ttcgcggaactccatgggctatgggcttcaacgcggtagacgtttgtccgaattttctggagcaaacctccgaccaacgatacaatgaatttttctattcaca  
gaaaaaagattcgaatcgaatgctactatagcaccggaggaatattcgaattatattctataataatccatttttgcgggggttactaacaggacttgc  
ctgcagagacgaggattcgtcgaaaagcctaaggtatccgggtatttctacaccttgggggtgtatagcccttacaaggtctaaagggtagatgagatctgta  
gtaggtaaaaagatttgccttgaatgagatgctatttccctcttaccgcgactattgtatagcttctagaagagcagatgacagagaggaaattacagttaat  
aaaaagcctaaaaagttcaactttacggcaatcaatcaactaaaagctctatgatcaatccttacagcggatttgggggtccgagatggttgaataagatt  
gcatgtggaaggagtagacgaaaaagatttggattcgaatagcgcattcactaagctgacttgaatccaatcagttcattagaaggatagaaaaggc  
gcgagatcgaaaaagaaaatcaatcttttaattgcttctcttttctatttcttattatataatccattcatttcttcaaaactcaaaatataatagctca  
atattcttataatagatacttaattatataagaatcctaagatattttgaaatgatcaaatcgaatagatagaaaatgtaatttgaatgagacacattctatg  
atgatttcaacttaccctctatttctgtcccttagtagccttagtatttccggcaattgcaatggcttcttatttcttattgtgcagaaaaataagattgctagaaccgac  
gggaccgaaatttctcaatgtatttccacacagatcataatcggatctttgtagttaagtaataatagatgattgattggtcttctacacacaaatgcaaac  
cgctatggatgggattatgtagcggatagggctacgacataaatgcatgatcgggaaccgggtatagcgaattttttaaagtgatcaacaataacttttgg  
aatagaaagtcaatgtatcaaccaatattttacaggagtagtatttggcgaaggcgaattcagaatcaaaaaagtaaaagcgaatcatttagcttattctcaatt  
tcaatcaccgctgttagtatataatgaattgctgacagacacatatgtagaacttcaaaaggttctcgaaaaagaggaatttttctggcctgtattctt  
ttctaggttcaactaggattctagcgggttgggcttccagttatcttggtaagaattatatactgtacttccatctcaacaattctttttccacaggggctggtgatgct  
ttctacggaatcgcaggcctattcattagcgttacttgggtgactatttgggaatgtaggcagtggttatgaccgattcagatagaaaagaggagtagtgc  
ttttctgtgggattccctggaataaaagctcgtcttctcctcgttcttctgattccttctgctggatccaatcaatgaaatcaggtttaaagaggcttttctcctgctgatcc  
tttatggaatccggggccagggggcattccctgactcgtactgatgagaatttttactccacgagaattgaacaaaaagctgccgaattgcttatttctg  
cgcatacaatggaagtattttagtaccattgaatttttgaatgaattgaatgaagaagaaatggaagaaagaaagtttctcaacacaggggaaaaaggtccct  
cgaaattgattattgaaagggtttttagtattatctaaaggaaagcaaatgaggataagagaaaatgcttcaatttgcgaagggtatatagctgtaatat  
tcttccatttctaccgaaaggacttttcttattcttattccactcctatgatctaaagaaagaaactcaatgcaatgaatttctactatagaaaaagaggaatag  
atacaaggctcaaacctgttatagaattttcttcaaaagaaaaagaaatcatatagatcagcgaataaagcggattcattaaactcaatttaccagatcaaaaa  
tgaaaaaaaagaaagcatttcttcttctatattctgtattatctgacttttgccttgggagcttcttcttcaaaatgcttgaacttggattaagaattggtgg  
aataccaggcaatccaaactcttaactgctattcaagaaaaagagttctgaaagattatggaattagaagaccttttattctggacgaatgataaaaagaga  
aacgaatacatgtaaaaaacccccctataggaatcagcaaggaaataatacaattggccaaaatagataatgagggtcacttccatatttgcatttctcagc

aaataaatctgttggctattctaagtgtctttttctgggtaagagggaactgttatttgaattcttgggttcaggaattctctataacttaaatgactcagtaaaa  
cttttttattcttttagtactgatttttttgggacttccaccgcgggtgggaactactaattctgttgggtctataacgatcttggatgggttcttaacagactaattt  
cactattttgtttagtattctctgattctagatacatgtttaaattttgggtctttttttaaaccgcctatctctctcgtttagtcatattatcaattagtgaagc  
ataaactcattgatctctgataatcaaaatagcattcttttctttagaaagaaaacgtttttcattttagcaaaattctttttctattctacgtcctcaaggtattc  
atcattccagtaacaactgttcagtagaatgacaacagattcgtgtataggggaactagattagcttagctacatctaatftttagtaaaatccgggatctgtgattgg  
acatggaaaatagaataacttttcttgggtaaggaacagatgactgactgattctgtatcgtatgatatacgaataactcggacatctattcaaatgcatatcc  
cattttgctgcagcaaggtatgaaaaccacgagaagcaactggacgaattgtatgtccaattgccatttagcgaataagcctgtggatattgaagttcccaagc  
agtgtctccgatactgtattgaagcagttctcgaattccttatgatagcaactgaaacaagtcttctaatgggaaaaaggagggttgaattgtgggtgctgttct  
tattttgccgagggttcgaattagcggcccccaccgtatttctcctgagtgaaagaaaagatagaaatctctcttttcagagttatcgtcccaataaaaaaata  
ttctgtgatagccctgttcccgtaagaataatagtgaaatcgttctccatttcccccgaccctgctatgaagaaagacgttcatttctaaataatcccataat  
gtggggggaaaccgaggaaggggacagatctatctgatggtagcaagagtaacaatacggctataatgcaacgtcaacaggtgtagtaagaaaaatactgcg  
aaagaaaagggggatataatatacctatgctgatcctggacccaagtgtgattctatactcccggccagaactcttgtttcagagggggaatc  
gatcaagctgatacaacattaacaagtaatcctaattgtgggaggggttggcaggggatgacagaatagtcttcaggatccattacgcgtcaagcctttgtt  
ttcttcgatccgtattttggcacaagtttttgggtcacaagaaacgtttgaaaagggtcaattgtacgaatgaattctaggtccgggatttctaccatcaag  
ttgtaaaaagcccaattattggcgaattgctagaattctctatgatcattttgaaatcttttttggtagactatttttggcagatgcttctcaattcctatt  
tctatctctatgcaaacgagggaaggaaggaagggcgagaacaataaagggaacaacatcttttaggagggtgctgtctcttaactcctattgggca  
caagaaaaagcctttttgcttttctgtgtcgaattcttctgtatcgaatatgaatcttttctcttcttccgcaagattactatttcttctttttgggtctgtcttga  
acctctttgcttaggtcagcgatgtagtgacaaaaaagggaagaaatattggcgggacaaatttttggtagcaaatgattgctgactgtcaattaa  
gttcaatttagaacctacagaattttgcaaaaaaacggatactctccattgaaagctgttttttatttttaggctagttagtagtttaataagggtttattagtttact  
ctaaatfaaatcaatgatttacaagagacttctccggggaataaaatattggaatcctcgttcttctctcctcgtctcataaaagtgaatfaattcattggcga  
gggggtataaatcaactgatgattactcactaactatttaacaacaataaacaacaacgaataaataagagggttctgaccatcagagcaaaagccttct  
ctttgtattttacaatcaaatagaaaccgtttgtaggtatggaatagataaaaaagtcgggtataagagtaagaattccgcgggtcctttccgctctaatca  
gataaagggggtaaggaccgctaaagttctatttttctatttttcaactgtcctcccaattactatagatgaaccaatccagaatagaaccgtaaaagaa  
aacacatttaaaccaatcacagcaataccgggtacagactatcagccaaaggaggaattctccagtagatcggcatttccccacttctctccacatttatacaag  
tggctatgctagagacaaaaacagctatgtagttataaggatggtatccttcaaatggggataagagaattcttactctcttcttctcaattgaagaagta  
attgaaaataaacagcaagtaaaaaatgagtaataaaccccagtagactggtacgattcaattcaacatttggctcattcgggttgattgtcatgctatag  
ttgaaattgggttattcgttgatgaactgcattgctgatattgatcccaagaaaaaacagtaggtacagctatcctgtgaacgccagccatcgcactgtaaaaa  
ggatagggtcgtatctgctcattgaggcctcctaaaaggatctactaaatctcagattgttctaaagaatcaaacgctcgttattaacggaattcctgtcggct  
ttctgtgaaatactcgtttgcccaggacttcaaacacgctataagctaaaccgtagtacaataaacaccgcaatgaatagggaaggtatagtaatgctatg  
aataaccagatcgaatactgtaataatatacagaaaagaacgttctccctgctccagacatgctgagctcccaaatttttgtacattcaaaaaaggaattgatt  
ccgtaaaagatgggatcaaccagtaaatagaaaactgataattcattctgtgagattgcaattttgtaccaaggtgtattttgagatatacaaatgatatgctat  
ccttctctatggcacagcaatcctgttctgctcgaacagaaattcttttctcttcttcttctctctctctctctctctctctctctctctctctctctctct  
aacctcaattttgagggtcctacttaattttaccggctcggaaatagtaataattcggaaatagggtcgaatcttgggaaaatcaagtaatgatcaacaggtttg  
gataaagaatttagaaagataattcttactgacacaatacaagagaatgtagatgcgaaagctatccctcgaatccaacttccccctaaagaatttaattggtta  
gcataataataatctaaataagaaaatcaaatagtagataatctgttatgaaagagagaaaacattcttgaagaatcaagattcgaatacaacccttgcctgtttac  
taacttcttgaccaactgcaagcgtggaactttgccagttcttaggttccgaaatagtgtaatggaaaaagaagtgcttcgaatcgaacttgattgggttcgaaaa  
aggaaataaaaaaagtaaatcaggaaagattccttttttaggagaccctcaggggtcgtggaatgcttctctctctctctctctctctctctctctctctctct  
aataaaggaatagggaataatcgaactgctcctcaaaaaaggttaaatatcctattgaaaaagaccaaaatagaagaacttttcaattcaattctttattt  
ttcactgggttagctgatctgcttaataattacttactcaattgacagattacacagcaaatctcttcttcttcttcttcttcttcttcttcttcttcttctt  
atttgaatgaattgaatgaataagcagaaaaaagaaaaatctcttttggatcctggtattctacgcaataattaccaattctttttcttcttcttcttcttctt  
aatitgactactatttagggataaatcgtacctcttttttttccctcgaacaataatgaaatgattgaaattttctatttggaaatcgtcttaggcctaattcttacttta  
gcgggattatcgtgactgctatttgaatacagacgtggggatcgtgactcttcttcttcttcttcttcttcttcttcttcttcttcttcttcttcttcttctt  
attgaaatgcaatttgggtttagttattttgcccctgctcgaataagatagatggaatcagcctctgtagatttgaacctacgacatcgggtttggagaccgctg  
tttaccgaactgaactaagagcgtttcaaaaatcaaatccttttctactcctaattgtctcagctacgtatagatccacaataaagttataccgcttataatcacc  
tctcactactgctataaagaagaagaaagtaataaggtagggatgacaggattgaaacctgacattttgtacccaaaaacaacgcgctaccaagctgcgctaca  
tcccttttcaaatgtgtacaatgctattgtacacaattctatctgtttccacatcctaaatttcttcttcttcttcttcttcttcttcttcttcttcttctt  
catataatcaaggaatggtatataatcaatcaattcactataaagaagattactattccttggtaactataggaagggattgcttttctgttttagttcgg  
aatttcgctaaacaaaagaatacaaatgatctggcaataatctgatcatatagctattcaataaggaaggagatttcaatgcgggatataaaaacatct  
ctctgtagcaccctgtaagtactctatggtttgggctttagcaggttattgatagaattaatcgtttatttccagatgcttcttcttcttcttcttcttcttctt  
gctatgtgaggaatagatttctgtgacatgataaaaaatccactttcaatccttttagtataggaaagaaaaagaaagaaagatagattgggttggacctta  
gagctatgaaaaatttgaatctctttttgaaaaaagaattcaatfaaaagcagatccaagctaaagcagcctcagaatcagagcatagaaagaggctggg  
ttggctactaaaatgaaaggattttgaagcaaatccttgaatttgacaaggattgattccttaattatttctatttttattacttaattgaaaaatttccaaaaattt  
tctaatggatttcttctctctcgttctcaaaaatagaggaataaagaataagtagaagaataaggttaagtaaatccaaaaggaaaggaggttatcgccaagg  
ggaagatgtagaatacagatttttgaatgtgaggttcttcaaaaaggccaatgaggagctggcagggttcttagatagtagtactcaaaaagaatcgc

acaatacaccggacaattagaattaagaaaatttgcgttattgctgtaagcaticgattcatgccgaaataaagaataggagcatcttgttctgatcttccaag  
atcaaaaagaataagaactctatftaataatctatftaataatagagcatagatagaatacaaaaatacaaatcaactgtctgattccattagatatttcatatgat  
cgagggtattcatataatgaccagaagagactattctctggatccaaataaataaacaatacaatfttttcaattttaaataaagaataaatcatgt  
atacatctaaacaaccttccataatccaacaacttccataatccaagcaactttctgtaaatccaagcaactttctgtaaatcaacaacctttctgcaaac  
caacaacctttctgtagcgtcctcgattggccgggggatcgaattgattatagaacatgagtttaataatcgaattattagtgaaaggaataatattatga  
gacgaataaataagattacctgaaacaacaacgattaactctctgctataaaacagctcgtattttatcttctaccattcgaactatgagaatgaaacaatt  
caagcccagtcatttcaataaftacaggtcctagaccagaaaaatagacatattctcttaaacacaaaagtcaattccaatcgaacttaagaactccaacc  
agactttaaagaacaacaatcggacttaagtccgattgttgatgtttatcgaaggccagactatataaaagaaagtaactcaatttagattctgggtttgtata  
agaagaacaatggggaagaaaaatagtttttatttattgcaacatgctcgttattcctaccacttaacttatttattgatatctcccggagtaccctccgggaa  
tcttttaattattcctgtatattactttttatcccttaattgataatctttttattggaatcgtgtaaagattattggatttaatacagctactgtgcaaggattttacgat  
taagaatcaattcttcttgaagattgtgtaattactataattatcgaactttatgattccgctgtctgctgtttatccgactgatccacaacgccgaaaatccct  
ctttgctgacttatctcgtatgagaggaaacaacgctctcttactgttgatgaatcattcgttaataagcctctaaagtttgggcaaatgaacg  
cattttgccgctgctccgactatatactcgcggaactctgctcattgaatcaataaacttaataagaataactaatgattctcttttagccatccttttccatt  
aatacaaaaacgaattatcccatataaaaatattagttccaatggctttgctactataacctccaaccacaattttctcttactccctcagttttcgcacgatact  
aaaaaatagtgggtccatcgtttctatggtcccttttaaacggcgagccctctctatacaccggagccctttcttcttctcaaaagggtattgtaactgtatagt  
tcacattcttggctctacatcattatagatgaatagctctttcaacaagaagttaccatacagtgacggcatttaattagaagttggctaaagtagctgaccct  
cttagctcgtttttaaagataaaggagcacaagcctttatcttttattactatctctccgcttaataagaatagccgtttgctaccaatgggggaattgctcttattccaatc  
agatgattgattgaccaaaggaaaccagaatccatatacctgtagaaatctagatagaagaagctctatctattcattgacccatgatactcaaaaa  
ttgcttattgtttgaacccatccgaacgagtcgacatacacctagacatgctcctcagcgtgaggacatccctaaagcggcgtttcttagcattcgt  
attgctgcttgcgtttcataaagtgttttaaccgttggcatgctgtatgtatagaaaaaatggattggttagatcgaatcaactgaattgattgatcattagaat  
attccattaaattgcataaaaccgaaattagggtgaaataaattacaagaatctggccactaccaatccttaaacattctgaaaccacactggatcagatcgc  
agtctcgtcaagcattcatcccataatcgaacagccataagcttggctcgtctgctgacataaaaacatccctttccatgctctcgatacaacccaaaa  
ggcttgcctgttcttagtcataaaacctgtgatcattcgcgaacttgtgtaactctccactctagtaaaaattctggtgttcttcccataaagaactagcagg  
ttggtgaagcataatcctcgcgtgggggaatgctatagcttgggttctcctcaagcagaatgaaggacgccatggacgctgctattccgagcatalgtat  
atatactggtgtcaccgttgcacgtatcaaaaatcgcattcctgagattaaccaccgccgggggagttataaacaataaataatgctaaattccatctctatac  
tgagataaccatgagacctgtaaatgattcgtgacctcgaacgaatcttggactaaaaaaagtgcctttctgatacaaacattgataagtaaccaaacgct  
gcttctcatcctgggaatcggtaaggtactttggaacaccaatgggcatattagattaataatttaaaagtaagaaaactacatttaaatgaaacgtaag  
aatggaagagaagaagaatccgcagttattgttttacttttcttattctatagataactatagattctattaatacgtagattgaaataatcatagattgaaagat  
tatacatataagtaggataagacagattgataaagaaaaagaatgggtgattcgaactaacaacaaaagagatagggatctattcttcttccaaataagcc  
aagctcccattgcatattggcacttatcagatataagaatagatctgcttcttcttctacgaacagaattggcttctatttttaaggaatgaaataaatcagcgtt  
tctgacacagaatcccatagaagggttaggtacatagatagatagcttggcaatgcgataaaataaagtacatcgtgctattttcttctgtaaagggtatt  
ccatgggttgccttggatcgtgttcatactgctgattgaatgatccggctcattgcttgcctatataatgcacacagctctagtttctggttgggctggctc  
ggctttatacgaattagcggttttgatccctctgatcctgttctggatccaatgtggagacaaggtatgttcgctattccttcatgactgttaggaataaaccaattcgt  
ggggtgttggagatttccaggaggaactgtaacgaatccgggtattggagattagaaggcgtggcaggggcgcatattgtgtttctgcttggcttcttggcagc  
tatctggcattgggtatattgggacctgaaatattctgtgatgagcggacgggaaaaccttcttggattgcccagatcttggaaatcatttcttgcagggggtg  
gcttcttggcttggcgcattcatgtaacgggtttgatgctcctgggatattgggtctgctgactcttggactaactggaaggtacaagctgtaaatccggcgtg  
gggtgcagaaggtttgatcctttgtccggggggaatagcttctcatatattgctcgggtacattgggcatattagcggcctattccatcttagtctccacc  
caactgtatacaaaaggattacgtatggcaataatgaaactgactttccagtagtatcgtctggtttttgcaacttctgtagtccggaactatgtgtaggg  
cagcaactaccatgaaattggttggcctactcgttatcagtgagcagggatacttccagcaagaatatacgaagagtagttaggggttagccgaaaatc  
cagttatcagaagcttggcttaaaatcccgaaaaatagcctttatgattatattgtaataatccggcaaaagggggattattcagagcaggctcaatggacaatg  
gggatggaatagctgttggatggttaggacatcctatcttagagataaagaaggcgcgaactttttagccgctatgctactttttgaaacattccgggtt  
ggtagatgaagagggaattgtgagagcggacgttccctttagaagagcagaatccaaatatagtgttgaacaagtaggcgtaacggtggaagttctatggtggcga  
ctaatggagtaagttattctgatcctgctactgtaaaaaatagcagggcgttcccaattaggggaattttgaattagatcggcctactttgaaatcagatggtgtt  
ttcgcagcagtcgaagggttggctcactttggtcatgctacccttgccttcttttggacacattggcatgggctagaacctgttccgagatgttttctg  
gtattatccagactggatgctcaagtgaattggaacattcaaaaagtcggagatccaactagaggagacagccagctgaggccgacttcttggatctt  
tcacctctcttttgaattgacatgggaaacatcctccatcccttcttactcttttctttttatagcggaaatgatcccaatgacaatgaatagggtggaagt  
aattgaaataaaccacgatcgaatcattggaagcattggtttatagcttctttatgttcgactttagggataatttttctctatcttccgagaaccactaaagctc  
cgactaaaaagtgaaataatttaattgaaagtaagaagctcccatctgggagactcttactcaattagctcccgtgtctcgaatggatcttattgtgagagg  
gttgcacaacgcggtatataaggcataaccagtaaaagcttaacagtaaacagatagggatggcactaaagtgtgtttccattttatagaattcaagattac  
aatggatctacgaaaagatcgtgatttacaactacaacggaatagatacaaaagtaacacaatcattaaatgaaattatggtctacacaaccgttgaagatggt  
ctagacctggaccaagacaacactcgtgtagtaatttattgaaacctgaaatcggaaatagggaaagtagctccgggttggggactactcttttgggggtc  
caatgctttattcgcggattctatctattttagaatttataattcttccgttttactggacggaattttaaataaggttttactaacgaaaactcagaatcata  
gttttccatccaaaagaccttctactttaaagctctacattctagacattctgtagctcaccgttggaaattttggttccgtatctctgaaatagatgtgtgactgt  
tagaattgtctcattgataacatagaagcactgttatctctatcaagatgattctaatctcggatatttttattctagatctggaacacgaaatagatagagtg  
gatcaagaaaaaaaatgaaactatgattcatattaactattcagacctgcaaccagactgaaaaaaatcaagtagtcttaataaaaataaaaaagaaaattct  
cctccaattttgttcccaaaaaaactttttctctcattttgtcagatcattaccaggattcaataaatgatcatcaagcgttcttcttcaagaacccttgccttt

gtttagcttgagactcaatcatcgtggctctagatgaatctaaagtttaattgaactgattcatagatcgcaacaagataatttctaccagaaaactactcaattttg  
ctttatattatctagtaaaaagagtaaatctgcattacgcacaaaaaaagaaatccaaaatagggagagaaaaatcaaggcctctaatgatcaacattg  
ggaagaaagatagacgagccaactgagatttttgcattatcacaaagaagaaattctggattttctattctatctcaaggcaaatgaccaaccaggt  
ggctgatgaagtttgaaccttttctaataatccgttgaattttgtgtttctgttgagccgtacgagatgaaattctatatacggttctcgagggggggtcgggt  
agttacatctcaataaagtatatgattggttgaggaacgtcttgagattcaggcaattgcagatgatataactgtaaatatgttctctctatgcaacatattttatg  
tttagggggaaltacacttactgtttctagtaacagttgctaccggtttctatgacttttactatcgcaccaaccgttacagagcgttttctcggttcaatacataatg  
accgaggccaactttggttggttaatccgatcagttcatcgtggtcagcaagtatgatggttctaatgatgatctgcacgtattctgtgtgatctcacagggtgggtt  
aaaaaaccccgcaatfaactgggtcactgtgtgtgttttagctgtattaactgcacgtttggttaactggttattctttaccttgggatcaaatgggtattgggcagt  
caaatgtgacagggtgtcctgacgcgattccgtaaataggatcaccittagtggagttattacgtggaagtctagtgtgggtcaatccactttgactcgttttatag  
ttacatacctttgactcctttgcttactgcccgtatttatgtaatgcacttttaatgatacgtaaagcaaggtatttccggcccttataaggaagcatctatagagagt  
tctaattctatatacatatcgggtaggtgtggtatttcatgtacaacaatgggtattctaaaataagacatgcaatttagatacttcttcaactccgaactattgtg  
atacaataatacaaatagttgaaagtaattttacgaaagaaagagggcgtattatgggaggtgtgcactgaaattatgattggccatgcagatagagagttggat  
ctgccacattagaattcacgaccaaggtgtctccatatacaatcaacacgtaagteccctgtctagtaaggatagggctgtcactgaggagaatattttctatgatc  
atacctcaacctgtcatcctgaagaggctccgtaagatcccatagagtagaagaaagaaatgcaatgacatgatcaattctctatttattacacttacttttattat  
agtatgaaatgcaattcttttgcacgtattgcacgtcgaataactatcggagtaaaagagggatcaaggaaacgtaggcctaacttttatttttattagta  
acaagtaatactttgtttggcagtaagaaactgcaatattgggggggataaataccaactaatcaagagacgcgagacaatccacaagcaattgatcatgatca  
aatttgaagcccacttggatattgagcattaccataagagtaggattctttcaatgaatgtgtaggtgcaacttcggaaaaatagaactgataaaagcttttctact  
tagagccattgagccattatataccttattctattatggatctctacggttttatttcttcttctcgtcagccggatgatgaaaaactctatgctcgggtcctttgggg  
gctggtactttaaagaactcactatcccaatacaaaagaaactgacttaaacgacccgtattaaagagcaaaaatagctaaaaggatgggacataattattacgggg  
aacccgcgtggcccaacgatctttatataattttccagtagtaattctaggtactattgcatgtaatgtaggttttagcggttctcgagccgcaatgattgtgaaaccggc  
ggatccgtttgcaactcctctggaatattaccagtaggtgacttcttcccggtttcaataactccgtacagtaacctaataagttattggcggttctcttaatggttctgt  
gccgacgggctattgacagctactttctagagaatgcaataaattccaaatccattctgctgccagtagctacaaccgtttttaactcggtactgcagtagctctt  
tgggttaggtattggagcaacattaccattgaaaaactcctaacttttaggtcttttttagggatttttctagttgattcattcaactgtgaagfaccgtgcataggtatctagg  
aaatagttactccaagtgaactctccctagatacctataatctattttattatgatccattctgcgaaaaatagattgtcccaagatgcaaaattgtttcttttttatt  
ctaactgaaaaagaaagagagaaaaaattgcaatggatttaaaactagaacttattcttaggtaaatccattgggagatgcttctctagagtgctccatactgtttc  
catcttgcatacgaaaactgcaattctcatcagatcttctccgttactcaaaaggtccaatagtgatggatattggccctttgagacaattatactgtctagaaggc  
agttctaattgatcaataaaaatacaattcaatggaaattctttttgtttcttttagattagtaattctttttgaaagctaaaaggggggaagtaaacctgttttattttctg  
gaaacgagtagccctctctcctcgtgtaagaaaaggaagaaataatcaatcaatfacgagaagcctcataaagcgttcttaggggttaaacctccattggtcca  
tatttctagaaaaagatctcatattttgcaattccattcccacaagcaaaaactataatcacaatttccgaacaggcatggatacagcatctatagataacttccatctt  
gagtggttcttctgactccgtgtgatatccgcgatctcttctgatccgtaactcaatcggaaatccgtgggttctgtcaagttagctataggtgtgccgtatcaacgat  
ttctacggaaggcggtaagataatctttgggcagttatgatctagacctttgacgcaattgatcgggttcaactccatagagattacttcaatacaatttcttca  
aatttagtaaaattctttagaccattctcaatcctgctattgtagaatattctgctggcgcacgctcccaaatgttgcattgtgatacatgttcttctgttttccaagtaa  
agctctcgcgaaggcaatacaacggatccgcttacccttctaaagcgggacagaatgaaacgaccataataaagacgcttactatctactcttgattcaacacac  
ttccactgtagtgtttgagtgatcctgctactcctctcgaaccatatagactagattattattgatcattgaatcgtttatttctctgaaaggggttfaatcttttacaga  
cgtcttttttaggaggtcgacaccattatgcccagataggtgtfacatcgcgtatacaacttaactgtacaccacttttagcaatgctcgttaatgcggcatcttcca  
ctaccagcacccttaccataactctgctcgttgcacccactgtacgaatgcatctacagctgttctttgaccagcagatgggtgatgctttcttgagctttgaaac  
cacaagtaccgcggaggaccagaaaaccaccgacctgcccgtctgtaacagttataatagattgttgaactagcttgaacatgaataactcctttgttattcta  
cgtgcactctccgtaaaactaaaacgcgcaatctacgcaaaccaatcgtacttctacgtgaaccaattttggatagcttttgcataatttattatctataaataatg  
agttagaatacaaaaaagaaaaaagatacaatccgttcagggtaaaataatcttacttgaattttttatttggaaattggacatttctcgggtactttttt  
ttactttttgaaagctcaagttctttttcgaagattaccctgtctttgtttatgcttcggattggaacaaatgacttaattcttccacgctcagatcagtcgacatttt  
gtacaaattttagcaacagaagctcttatttcatatttccgtattccttcaactatgaatttactcttttgaaaaataaagtctcttgtttgaaatttagaactttgaatttt  
taacctagaaaaaaagaaaaactaacctttgaaactttgtatccttcaaatctcggatccttcgagcttcgggtacgctcgaactctatggggaggtctata  
aattatacgccccctgttgaatcaaacgacttactcaattttgacctatccccatagttatctgataagaactagaccggtatcttctgaaatatagccaggtatg  
atggtgtcattcttagcgaacgcggaacattccgttggtagggcctccataactaaacctcgaagtaattttgcttctcgggttttttttctctctatttttctt  
ttctgcatattttttctctatttttttttttttttttttttttttttttttttttttttttttttttttttttttttttttttttttttttttttttttttttt  
ggcgattaccgctatagcggggcgtattaccatataacataagacttctcccccaattctgtttagtcgagcttctgatctgtattatacctcgagaagtagaaag  
aatagcaattccattccgccccaaaccttaggaattccttgatagttggcataaattcgtaaagccagtcggctgatacgtttaaaaaggttctagtctatattcc  
ctttctagcttctctttttgatgctgcaaggtgaaaccaagaaatctgttacttctctgatgtttccgaacactttcaataaaacctctctgagaagtatttfaaatgt  
ttcggtaaatatttgtagactaccgaaacgttctttttattcatgctccgcttcttatagaggttagtaaatcagcaatagctcctgccataagactctaattcta  
ggctcctctaattttctataatcaatgttcttctttttcttttcttttggattctaaagcatatacgtgaaacacaatctactaattttttttttgatctatacttctactag  
tattataactctcaggagctaatgaaactatttttagtaaaatcaactctcaatctcctcggcgtatcgcgcaaaaacgcgagttccttttgatttctttttgatcaatg  
ataaccgctgattgctgcatagcgtattattaccgtctcgtattgaaactttacatgtacgtacaattacagctcgaattacttccggatcttctagagcatttgg  
ggcactgcgtcttattacgacaacaataacatccaatcagagcatatcgtgattactagcagctcctatgactcgaatacacatcaatttccgagctccactgtt  
atctgctacattttaaagggtctgaggtgaaatcatattttttgattcaattttgtatttcaatgcaaaaaggatgaaagaaatattgctttccagaaagaagaaacctggtt  
tttttttcaactactttttttggggggttatatttcaaccgaagaaattgacttctgatggcatttttctgctgagctatgaaatagctgctcctagctacagtttccgga  
tactccgccatttcaaaaatgattcgaactggttfaaacagggctaccaatattcgggggatcccttccgaaccatacgtgttcggctggtctatttgaaccgg

ttgtcgggaaatatactaccagatfttccaccacgacgtgcatatcgtgtcattgctctcgtctctatctgcctcgcgtaatccaagtgggtcaagtgc  
tgaagagcatactacaaaacaafacaattgcctcggtaggatttccctcattctcctctatgttfttacgaaatctgttctfttggggtatagtcgatgttctc  
cttagtccatctctactgcaaaactggacatgagagttctctcatccagctcctcgcgaatcaaatgagaaagtgtgcaaafttctcaatccacaatattctaaat  
attacggatagatacattaatggaaggttaggggttttaattgaattfataaaatactaaatataatagtcagaagagagatctagaatatactagatgtgat  
gtttattatctatatttataatgtaattcttttttttaactccttttttttactcttattgaatcgcggtaaaagtattctaaftcaataaaaaattcgcggcgaata  
ttactcttctgcttattgttaattcataaccttaacaaaataagacaatttttggttgtccgccatcccaccaatgaagtattgggattctttcaagaaaatcctat  
ccagtcataaggctctgctgtccactgcttcttfaatggttaggttgaatctcgaatggagcttccaaaaattcttccgagtcatttctcagtttattaactc  
ggacgctcttgttattcctgaaattgtattctgttcaatcaatctacgattcgaattctctgtattttatataatgatgctttatcacattgcttttatgatgaattcat  
agaccatacatattggaatcctatacttcttattctctccttcttctatcctccttcttctacatccccttttagtttgcttcaacaactagaatcctattttttaaag  
aaaaaattgcagttgctcacgatatgatagattactcattatgatagatgtattatcatatagtgactgttcttagttagatctcgacaatcgaagcaataggtt  
ggttattagttcaatttctataatcattagtaggggtcattctatttttttaacccccttttgaaccctaaaaaaactaacgagtcacacactaagcatagcaattttatt  
aaaagatttctcaatttctataaactctatagaagaggtagaatttttctttttcagggtatttagggaaaataaggtcctgtcattttttattcttactgaacagaatg  
ggaagacaggggtgttattctctgtctacgaatfcaaaatttaaccccataaccccataagatgtcgaattgtagacgcaataatcaatttagcgcgaattgtt  
tggaggggaggtctacctttttgatgcattcggcgcgcgaattctttcccgagacggcctgaatttttactttactccctttatctgttttttaattcaat  
ggctttttcattgcttccggaatgaaactctatttttaattgaaagctatatacttcaagaatgttaggttctataaggttcttacttttcgatccaatataag  
ctctgtttacagaatfaactctttttgtagcttctctaatctcgtattgctccttttttaataaattggggaatccaataggtatgacgttgattgatcgaattc  
ttttgaafttctatagtgtaactctcggaaacttgagcctgagctcattttttatattgtgtaactctcgaacttgagctcttatttttctatcagcccttttctta  
cttttataatagttctgataactccgtattttttatctctctgtagacctcagaataatttttgggtgtcgaacaaaaggaaatgggtgttttgggtgtaccaagt  
ctgaaaccaagtggattfaattttgtcccatatttttctattttttaccgggaaactcaactctagatggatctaaagatttttctgatttttctatatttagacaatt  
gttatatgacacatggttttttatgggagaactacgtctcagcccagggtctgaattattcataatagctactcctactgactcggccttagtgatgaataaattgct  
ttgtcgaatccctataatgagtagcatttgcgtcgcgaataaaccactttaagatgggataagatgctcgaatggcatgaggttcaatatacacaactgttctc  
tagtaacccaacgaatctcaccagaactcttcttcttgaacacggacatgtggtcgtttttgtctttgaaaaccgctcgaactaaagtagacgatcgttgggt  
actttctcggagtttcttagcccactcttcttcttcttcttcttaggggtatactttaccagttgaaactgtcataaataagggttattccccgcttactcttctttttt  
attttgaacttcttattctgaattcagttaacgacgagatttagtatcttcttgcacttccataactcgtgaaatgccgagttggtacgaattcccccaatttgcgacctac  
cataggattgttatgtaaataggatattgttcttccattatgaatcgcgattgtatggcaaccattgcgggtagaatgcttagatcccgggaccacgttactattgtt  
tcttctcctcctcattatgacctttctatttttccaataaataatgatgagctacaaaaggattcgttttttctgtcagactgattactccttttttccatttaaagagtgg  
cattcagatgccaatctcgcgaatgtaggtcagaataaatagaataatgatgaatggaaaaagaaaaatctttagctggataaggggcggatgtgac  
caagtggatcaaggcagtgattgtgaatccaccatcgcgggttcaattcccgtcgtccatcccattattgcaaatccaaaatgcaatttccatattcctag  
ttacgtatttactacggcgacgaagaataaactatcactatatttttcttttcttagtcttcttccaaagcgcagataacccaagggggtgtgggtttttctacca  
atgggggcttccccaccgccccatgggggtgtccacaggggtcataactacccttactacggggttacttagccaacacttagaccggctctacc  
caactttttggtcaccacaacattaccactgtcggactgttgaagaagtttgggatacaaacggacctcccagatggaatctaaagtggccgattacc  
tcttttgaatcagtttctgctacagacctgctgcttagtaattgccacccttccacgtgtgatttctatgttatgtatggccgtcctaaggcgcatacgttga  
gtagattcttcttctcaaaaaacccttcccaactgtacaagcttcttccaaagcatacggcttctagatgtatgatgatcttagacagatggatcttatatga  
atcgtatgatgaagtaccacatgagtgatataatggaaggaatccaatctgccgaatcgcctatgttatgatcttctacatcctaggtctccgcttccgctcctg  
gcttatgttctctatgtagcattcagatcgaatgactctatgaatctacgctgatacttctacatattatgggtaacgtaggagacatccctatttccccgggggtttaa  
ttaccactgcttagcttcaatcgcctcgtaccatcaaatatgtgaataaccgctcctctcttftgaaacaaggggcttccgggtctgtcgtgcttcaaca  
attttgtcttccatattaccatctctagatgcaaatatttctatgaggaactactgaactcaactgtcctccgttactcaacagtttctgttgaggtctatcccgt  
gaggtatgcaaaftggatcagtgatcatttctaggttctgtcgtgaaacctaatgttactccaattacgaaatcaatagttcaaacgcaactcaaggtaggcatt  
tccattgatataggaactttgtaccagaacaatgtagtctcaattatagcccctctgggatgaaaaatataccttctaccatcccatagtgatgacaaaat  
gtacgcatcttgattagggtctgattctatggttacgattctaccagatagcttftttgattccgtcgaatcgaatttctacggtatgacctccccctctatg  
ccttgcggtaatgattcctctggaattacgaccttaccacaacgggtccgtccatggatcaaatatttctgtgattggattcacttgcctatctatggttccctgtg  
tctcgggatagggtgtttgtataaatgttcgcgtattatfaagattctccttttctctctatctagaagtggaaatagaataaccgggtgaagggtaatgatcat  
acgtctgaatgcattgtatgtctagaataggggccacttcttacccttccgggtagctgaggtcattcagactactacccttaacccaagaagaaggttcgacc  
aatgctttatttctgtcttagtgaatccgattcgaatfaaaatgatatgattcttcccaataaacgaaacttttctgtaataactcgtatttgattccatccataaatc  
gacttccccctctgctctgagttccagatcagataagaattcagttctattgttctatgttatggtatgaatatacacaactcgttatgatggatgag  
attccatggatagagaccagttccaatagactatggaacgttccggtcgcgtgcatccagcaggaattgaaccgcaaaattaccaatfatgattgggcttca  
accatcagccatggatgcttaacaggatcctgtacatcgtataaacaatttctatagaagacatatagaaaaatgaaatgaaaatattcggagatgg  
caaatattcggagatgactatgaaaacacctctctgacccctgaattgaaagagagattgagaggatccagaatcctaattctcgtatttgaatggatcaattc  
tattgagctgactcatagtgatctttcttttagcaagaatgaccttggattcaaaaggattgaaacacgggatccgttacttatgacactgattgacattgataac  
aaggatcaatgaattatgatttaataatagatcctttagcagaagacgtatattctgtctactatttccaaacctgtaggggtaaatcttttaccatc  
tcagggaaaatcttttcttccgcttagccctatcgggtattttatgtataggtctatagaactggacgatctatttctgcaaaactaatgaaaaatctatttcc  
cttccattaaaggtaggggtcttattccacaagaaaagaacgaaagcacctttcttcttctatatactgggggttttacttggaaaaacaatgttccatactaaa  
ggattcgggtccataaccacgattcagctgactagatctgtagcacttagcaacgagggccctatgaatagacataagaatftttgtcgggaaattcgaatgaat  
cattgagtgaaaaggagcaagaatgacaaaagacgagactctactagcttctactctgtgttctcctggttctgtttcttattcgggatcttgccttcatgttct  
catctctgcaactcgcgatttccgagagaaccaaatacaagttggtgaagatcatgatttgggctggcatagtagtgattacccttgaattcgggtcgaatctatc  
cgatcttattcttttctcaagaacgaataaaacccttctcgaagcccttattgataagcttccctggatctgggaagtttcttctcaccggtattgggatcttggatc

gatttccttgatcgcfacctatggcgtgcgctcaaggatacaaacaggatcgaacaaaaagggaattcgtagtcacttttctctgctgcaaaaaaagg  
ctttacgcgagagcaatagaggtgggatacctctctctctgagcaacctctttgattcttaagaccaccttgcagtaggataccgctctgttgggtctttatta  
tattatctcttcgagggatttttagatcgttcaggtctatatttagctattttgcttttactgtctctttctcagggaagtgttaaggacctcagaagatagaggaga  
gcgccagcgcgagattccggaacttctacgggaatgctcattgaatgcgcaatctccgtattatgcttgaagaggactcgaacctccacgctcttttagcacga  
gattttgagctcgcgtctaccattccacatcaaggcatcttgaagtgaatcgtattccatgaatgatactatctaatgtatataatgacaaagggtg  
gagctttggagtattcgtcgtcggatcatataggcctgagtcagacatcaaatagctcgtattgcaattatccgtaggacacctatatagtatcaaaatcaaaaagatg  
tacaatccaatttctcgttcaatagaagcccaaggaggtgcatatggatcccaataaggatagatagatgtaaaagcaggctctgattacacctattctaatc  
ctaaatagaatgtaaggacgtggggatttctatgtaaacagatctatttccataggtcgaatgaccttctcataataagaatgtgcacggtctggccggtat  
ggaatgaaactataatctgatgacgagtcgattccatgattataagttcattccctagcgcacctccattttggcgggaacagatctactaattctttatccagtta  
gtaagagggtcttgaactaagaatagacctagcagctaaaagggtatctctgagcaattgcaagaatggggttcattgataattcctggatagtagatgctatca  
cacatcacgctacataactcgtatggaattgttctgattcaagggtatctctataattcgcacataagggttatttctgtttcgtccagtcattataaacttgactat  
ttttagataatagtagatagaagaacgctcgaaggatcctattgaaaccaagaatataaggcctgcttgcctaccacaccagaatagatagattttccgaagaa  
acctgctagtgagggaaggcctcctagggataagagacatagggctaaagagagacccaaaaaggatcttctgtataatctgcataatctcgaatgttatcag  
ttccggtagctagacaaataatacaatgcaagcaaaagtcttagattcatggagatatagaaaagcataaagtatcatgcttgcataatccatctttgagctcca  
acaattattccaataattacataccgatttgcctatggagcaaatgcaagcatactgttcatgcttgtttgagtaatagaaggaattcccaatcatgctaaagaa  
tagctaggattccagaagaagatgcccattctgtatgagaaataaaaggaaatcagaaatcgcgtggctgaagctgaagcagcaacttccgaagtaacagaa  
agaaaaacacgactggagtgggggagtcagagtcgaaaagagagattcctcgtcttctctcatgcaaaaccgtgcatgagacttctcgcacggctcctaa  
gtgataaaagaaaagaacttctcttctttttgattacctctcgcgtatgataagaccgaatcatttcttgaatcgtttcgaataatgaaactcaatcc  
ttaaactttcagagcaactcctcatgaggtgtgaaatgactgttttcaatcctttcgaacttggctccttaggagcaagtcagaaaaggttgaaaatgaacctatc  
gatttgattcgttccaatagccatgagatgacatcttaggggtgactcttttgaacggatgctcctattacactcgtagctctgaaaggtgagaaccactatgtag  
catctacgctgataatcaagcattgtatagctattagctcgttctgttagaactaccgtaataacgagcttgcataatggatctgtttatcaaaagagattcgtt  
gttctgacctgcttccacttaattgttattgaacaaaaagatcacaataaacttttgaanaagttctgtctgtcggagtgggtagatcttctctctgcatatcta  
tggagtttgcataaaccacacctcagagatagatagaggtggaatttgcgaacgaaccacactcctcgtagacgctcaggagctcattgatgaaaagg  
gctggggaagcctgaacccaagctcctacagtgatggatataagcgaattgaaattcctggggagtatacatttgtattgataagaccgttcacaatttctgaag  
ctcgtatccccccagatgaacatatagccaagagaaccatgaaccagaatagaagagcttccccaccatgagtaaatattcatagtagcctcattagacc  
gtagatctctctgtatataccagacaataggtggaacataaactgaaacttctggagctacaaagatagttataatcgttagcaccacataaaaactccccct  
agagtagctgttaaacgaatacagaactctgttatagccatttctgtacattcaatgtactctacggatagaggaatacataaagtgaaacataaaaaataagaaa  
ttgaaagatttctgtgaaattgtctgttggaaattcccgaanaagctaatataggttcttctccatcgaacaaataggccgttatgcttactaaactgttgaaga  
gatgaaatagaaccaaggtctatcttttgcagaggttaaacgatcatcagaagaagaattagccaaaaatagatacattctggaaaatgaaactccctgg  
aagagaagcaaatgaaacgcttcaataaaatctcgtagaatcagaatgaaggtttcattctgtacatgccagatcatgaattagtaactgcatccaatctccgaaaa  
gtcccgttcttctgattttggatggatattcggatccccatgaatagatcaaaccttattccatgctatttccataagattccttcttattcttaagcaagccc  
ccgagagggttagtgatcatgatttctgtttctctttctttcttttcttttcttttcttttcttttcttttcttttcttttcttttcttttcttttcttttctttt  
atccatgtgctacatacctagattctgttcattgattaacgaaaatgtcaagagctctatttgcctctgacctctatgagtcgcttcttttcttttcttttctttt  
cccccttggcagcatctactaattcgaacttaattgaaagccatatttgcaccggagcgttttgggatgcttcaataaccaagatgccaagtcttcttcttctt  
agatctatttcaatcgaacttccgcgtcgatectttttattacgtcttgttttactcctatattgggagttactctacgtattgcttgcgtaaaaccaatagtgattgt  
ttctgtctttgttgaatctttcagggctcagatagaaattgataagccaatgatttttccgtcttcaataacggttaaccaccatgtaactaatcattacgaaaaa  
ttggatcggattttgacgttcttttctcagctacctcgcagctgatgagcgtgaaagaggttcaagaatccgttttcttttataagggttaaaaacgaactattttt  
ttgctttttgacccatattgtagggtgagctcgaagataggaagatcctcccaagccgtacatacaacttctcgaatacggcttccacagaattctatag  
ggatctatgagatcagatgaaatcagttactacttaaaatgagatccttccctcttcttccgctagatcggaaatcctgtattttccatataccatca  
agtccttaggttccgaaatagtgtaatggaaaagaagtgctcgaatcattgctatttgcactggacctgttctgaaaagtcgaggtattcgaattgtttgtgacac  
ggcaaaagtaagggaacccctgaaaatctcattgaccttggacatataagagttccgaatcgaatcctttgaaaagaagatctttgtctcatgtagcct  
gctccagtccttctacgaaacttctgtattgggttagccatcacttccatgctttctagcgaattcacatggcatcacaatgatacaagcttggataagaatctaca  
cgactagaacgcccgttgcagattcttactcgcagacatctagggtcctcgaataatgcgatactcacaccgggtaaatcttcaaccttctcctcttacta  
atactacagaatgttcttgaatattggccaataccaggtatataagcagtgattcaaatccagaggttaatcgtactctgcaactttactgaagcagagttgggt  
tttggggtgtagtgaaaagtcagacataagtcaccttctgtccctctacagaaccgtacatgagatttccctcagcgtcctcgttcaattcttccgaag  
ggatcctttctcgtcagagctcgccttcttccactcctcgcagactaactaagaccaatgagtcacgtttctatgttcaattgaaactttccattatgat  
taaaggagaagattgtcttttaccacaatagcggatcaaatcagcttataataaagaagaatcttctcggatcaatecccttcccctcattcttggagaatcag  
aaggatccttctcagtttccatttctcatttgaatctggctctctatctcactatttttttcttattcttatttatttcttatttcttcttctctatccctat  
cctctaggtagcgtttgcatcaatagaaacttctctgtatgaatctatatttccattccaatttctcccgaacttcccaagaaaaatcccgaattggatcca  
aaattgacgggttaattgtgagcttaccatgcggttaggactctcaaatggaatcatttctcaactggcttctgtcttggtagctgcccagatccttctgatga  
cctatgttgttgaaggatataatgatccgatcattgcataagaccgcggtagcaatagaacggggaagatatacgaagacagttctttcaatttctga  
ttatctatattagttcttctatttctatagatatttctatataatagattagttagtagtactattctattagttagcgtatcccggctctgtgagttcttctccgtatga  
actgtcggcaccagctcctcatttttctgtggaccgaggagaagggggctcagcaggaagaggttaccatgagagaagcagagagtcacacctctca  
aatatggaacatgattctggcaatgcaactgagttgggtcctcattcgtatccgaatgaaatcagctttctacagaggcaatcttgcctattaggaagagatag  
caagttcgaatttctgctcggtaggacatgatttctattactatgaaatcataaatgaaaatgaagtagttaatggagggtaccattatcttttcttctgtatgttct  
ctaagagaaggaatttctcattctgattctcagaggtctcaaaaaaggcgtggaacagatagaactcttgaatgaaattgaaaagaatgtagccccagttcct

tcgaaatggttaagatctttgcccgaagaaggggcgacccatatacttctgacttgggtctcttcccctcttttttaagaataccgagtcgggtctctctacc  
agtatcgaatagaacatgctgaacaagatcttctcatggaacctgctcattatgacgggaaaatcgtacagatttatgaacctgctctatggctcgaatccat  
agtaactctatttctgataggaccggtgacaattgaatccaattttccattattgactatccataatagtgtgaaaagaaagcccgaggaaaggtggccttgag  
ttctcgtccccttgccttaggattcgttaattctcttctcagggggacggggaaggatataactcagcggtagagtgacacctgacgtggtggaagtcacagtc  
gagcctgattatccctaaaccaatgtgagttttctattttgacttactccccccgccacgatcgaacgggaatggataagagccttgggtgacgtgatagggt  
agggttgcctactgctggtggcgaactccagcctataatctgaagcgcattgatacaagttatccttggaaagaaagacaattccgaatccgcttctctacgaa  
taaggaaagctataagtaagcaactatgaatctcatggagagtcgatcctggctcagatgaacgctggcggcagcttaacacatgcaagtcgaacgggaagtg  
gtttccagtggcgaacgggtgagtaacgcgtaagaacctgcccttgggaggggaacaacaactggaacgggtgctaatccccgtaggctgaggagcaaaa  
ggagaaatccgcccaaggaggggctcgcgctgattagctagttggtgaggcaatagcttaccaggcgcgatgacagtagctggccgagaggtgatcagcca  
cactgggactgagacacggcccagactcctacgggaggcagcagtggggaatfttccgcaatggcggcaagcctgacggagcaatgccgctggagggtgaa  
ggcccacggctgcaactctttctcggagaagaacaatgacggtatctgaggaataagcagcgtcaactctgtgccagcagcccggtgaagacagaggat  
gcaagcgttatccggaatgattggcgtaaaagcgtctgtaggtggctttcaagtcgccgtaaatccaggcgtcaacctggacaggcgggtgaaactacca  
agctggagtagcggtagggcgagggaaattccggtggagcgggtgaaatgcatgagatcggaaaacaccaacggcgaagcactctgctggccgacac  
tgactgagagacgaaagtaggggagcaaatgggattagagaccccagtagtctgacgctaaacgatgataactgatgatactaggtgctgctgactcagccgctcag  
tctgtatgtaacgcgttaagatcccgcctggggagtagcttcgcaagaatgaaactcaaggaaatgacggggcccgcaaacgggtggagcatgtggtta  
atcgtatgcaaaagcgaagcaactaccagggcctgacatggcgcgaatcctctgaaagagaggggtgcccctgggaacgcggacacaggtggtgcatgctgt  
cgtcagctcgtgccgtaaggtgtgggtaagtctgcaacgagcgaacctcgtgtttagtgtccactatgatttgaacctgaaacagaccgcccgtgttaag  
ccggagggaaggagagtagggcgaagtcacatgcccctatgcccctggcgcacacagctgtacaatggcgggacaagggctcgcgatctcgcgagggt  
gagcctaactccaaaaccgctcagttcggattgcaagcgtcgaactcgcctgcatgaagcaggaaatcgtatgtaacgcccgtcagccatacggcgtgaaatc  
cgtcccggcctgtacacaccgccgtcacactataggagctggccatgttgaagtcattacccttaaccgtaaggagggggatgccaagcctaggcttgcg  
actggagtgaagtcgtaacaagtagccgactggaagtgccgctggatcacctcctttcagggagagcctaatgcttatgctattgggtattttgtttgacactg  
cttcagccccaaaagaagcagctacgtctgagcctaaactggatatggaagctcttctgttaggtgaaagtaagaccaagctcagcttattatcctaggct  
ggaacaatfagtgtatagtgataggatccccctttgacgtcccctgccccccccgctggtgctggcggcatggggatgcaaaaagaaaggatggagtttt  
ctcgttttggcgtagcagcctccaaaaggaggcccgcgcgacgggctattagctcagtggtagagcgcgccctgataattcgtcgttggctggcctgt  
gagggtctcagccacatggatagttcaatgtctcatcagcgcctgaccgaagatgtggatcatcaaggcacattagatggcgtactcctctgtttgaatc  
gagtttgaacaaacaactctctcagggatagatggggcgatcaggtgagatccatgtagatcattcttactcgtgggatccggcggtccg  
ggggggcactacggctcctctctctcagaatccatacctctatcagtgatggagagctatctcagcacaggtgaggtcgtcctcaatgggaaaatg  
gagcactaacaacgactctcagacaaagaactacgagatcaccttctcattctggggtagcggagggatcgtaccatcagcctttttcatgctttcccgg  
cgctctggagaagcagcaatcaataggactccctaatcctcctctcgaaggaagaacgtgaaatcttttcttccgagggaccaggaggttgatctag  
ccataagaggatgctgtgataaataagccactctgtgcttctgactccctaaagtcactacgagcgcctcctgatcagtcgaatgggatggtctattatctatctt  
gactcgaatgggagcagagcaggtttgaaaaagatcttagagtgctaggggtggccaggagggtccttaacgccttcttttctgccatcggagttattcc  
caaggacttgcctgtaagggggagaagggaagagcacttgaagagcgcagtagacaacggagagttgtatgctcgttcggggaaggatgaaatgctccc  
gaaaaggagtctattgattcttcccattggtgagcgtaggggcgatgattactcagggcgaggtctctggtcaagtcaggatggcccagctcgcag  
ggaaaagaatagaagaagcagctgactcttcatgatactccacttggctcgggggatataagctcagttgtagagctccgctctgcaattgggtcgttgcgatta  
cggttggctgctaatgtccagggcgttaatggtagatctgtacgtgaaccgggtgctcacttttctaagtaaggggaaaggactgaaacatgccactgaaa  
gactctactgagacaaaagatgggctgcaaaaaggtagagggatgaggtggcagttgctcagatctagatgtagatgtagacgatagttggagtcgg  
cgctctctaggttccctcatctgggatccctggggaagagatcaagttggccttgcgaatagctgtagcactatccttcaacctttgagcgaatgtg  
gcaaaaaggaaatccatggaccgacccattatcaccaccgtaggaactacgagatcaccgaagcgccttcggcgtccaggggtcagggaccga  
ccatagacctgttcaataagtggaacacattagccgctcctcgggttggcagtaagggtcggagaagggaatcactgcttcaaacagcattctaaagt  
ttagatcaaaagagtcggcggaaaaaggggagagctcccgttctctctctagctgattccccggaaccacaagaatcttagaatgggattccaact  
cagcacttttgtttgagatttgagaagagttgctcttggagagcagatcagatgaaagtgtagctgttccgggggagttattgtctatctgttgcctctat  
gtfagaaccctcggggagcctgagagggcgtgtgtttaccctgtggcggatgtagcagcgggtcgaagtccttctcagcccgtgaactagcggatatactatg  
atagcaccgaattttgcaattcggcagttcagctatgatttgcattcatggaggtgataagatccttccatttagtagcaccttaggatgcatagcctaacgttaa  
tggcaggttcaaaaagagaaaggcttgcggtggatcctaggatccagagacgaggaaggcgtagcaagcgaacgaaatgcttggggagttgaaaataa  
gcatagatccggagattcccaataggtcaacttttgaactcctcgtcgtaatccatgagcagggcaagagacaacctggcgaactgaaacatcttagtagccagag  
gaaaagaaagcaaaagcattcccgtatgtagcggcgagcgaatgggagcagcctaaacctgaaaacggggttggggagagcaatacaagcgttgtgctg  
ctaggcgaagcgggtgagtcggcaccctagatggctaaagtccagtagccgaaagcactactagcttaccgctctgacctgagtagcatggggcacgtggaatc  
ccgtgtgaatcagcaagaccacttcaagcctaaatactcctgggtgaccgatagcgaagtagtaccgtgagggaaaggtgaaaagaacccccagtggtgta  
gtgaaatagaacgtgaaaccgtgctgagctcccaagcagtgggaggggaaagtatctctgaccgctgctgttgaagaatgagccggcactcatagggcag  
ggcttggtaagggaacggaaccaccggagccgtagcgaagcgaagcttcatagggcgattgtcactgcttatggaccgaacctgggtgatctatccatgac  
caggatgaagcttgatgaaactaagcagaggtccgaaccgactgatgttgaagaatcagcggatgagttgtggttaggggtgaaatgccactcgaaccagag  
ctagctggttctccccgaaatgctttagggcgcagcaggtgactggacatcaggggtaaaagcactgttctgggtcgggctcgcgagcgggtaccaaatcagggc  
aaactctgaatactagatgacccaaaataaacagggtcaagctggccagtgagacgatgggggataagctctatcgtcgaaggggaaacagcccgatca  
ccagctaaggcccctaagtaccgctcagtgataaaggaggtgggggtgcaaaagcagccaggaggttgcctagaagcagccaccttaaaagagtcgtaat  
agctcactgatcagcgccttgcgctgaagatgaacgggctaaagcagctgcccgaagctgtggatgtcaaaatgcatcggtaggggagcgttccgccttaga  
gggagcaaccgcgaaagcgggggtcagcaagcggaaagcagaaatgctgcttagtaaacgaaacattggtgagaatcaatgccccgaaaaccaagg

tttctccgcaagggttcgccacggagggtgagtcaggcctaagatcaggccgaaaggcgtagtcgatggacaacaggtaaatctctgtactacccctgttgg  
tacggaggggacggaggaggttaggttagccgaaagatggttataggacacaagggtgacctgcttttcagggttaagaagggttagagaaaatgcctc  
gagccgaggtccgagttaccaagcgtcgagcgtgaagatgtaaccatgccatactcccaggaaaagctcgaacgacctcaacaaagggtacctgtacc  
gaaaccgacacaggtggtaggtagaafacttagggcgcgagacaactctctaaagaaactggcaaaatagcccgtactcgggagaagggtgccc  
ccctcgcaaaagggggtcgcagtgaccaggcccggcgactgtttacaaaaacacaggtctccgcaaaagcgtaaagacctgtatgggggtgacgcctgcc  
cagtgccggaaggtcaaggaggtggaactgatgacagggaagccggcgaccgaagccccggtaacggcgggcgtactataacggctcctaaggtagcg  
aaattcctgtcgggtaagtccgaccgcacgaaaggcgtaacgatctggcactgtctcgagagagactcgtgaaatagacatgtctgtgaagatcgggact  
acctgacctggacagaagaccctatgaagcttactgtccctgggattggctttgggcttctcgcgagcttaggtggaaaggcgaagaaggccccctccgg  
ggggggccgagccatcagtgagataccactctggaagagctcggattcaacctgtgtcagaccgcgggccaagggacagctcaggtagacagtttctatgg  
ggcgtaggcctcccaaaagtaacggaggcgtgcaaaagtttctcggccagacggacattggctctcagtgcaaaaggcagaaggagcttgactgcaaga  
ctcaccctcagcagagacgaaagtcggccttagtgatccgacgggtgcccagtggaaggccgctcctaacggataaaagttacttagggataacaggctg  
atcttcccgaaggtccacatcagcgggaaggttggcaccctgatgtcggctctccacctggagctgtaggtggttcaagggttgggctgttcccattaat  
gaggtagctgagctgggtcagaacgtcgtgagacagttcgtccatctcgggtgtagagcattgagagaccttccctagtagagaggaccggga  
aggacgcacctctgtgtaccagttatctgctcaggtaaacgtgggtgccaagtcgggagaggataactgctgaaagcatataagtagtaagccccca  
agatgagtgctctctccgacttccctagagcctccgtagcacagccgagacagcgggttccaccctacgggagtgagcgacagaagcatggaa  
ataggataagtagcggcgagacgagccgttfaaataggtgtcaagtggaagtgacgtgatgtcagctgagcctcctaacgaacgaacgattgacctgtg  
tctacacgacctgatcaaatcagcagcacttgcactctctcattgtcaactctttgatgaaaagatgaaaaaaccaaaaaaagctctgcccctccatcttgg  
gatagatagagaggaggcagagggccttgggtccttccagtcgaagattgggcttcaactactcagcgggtgacgatactgtaggggaggtcctgcccgaata  
gtctgatgccagaatgataaaaagcttaaacactcttattgtacttttcaactatttgaatfacgaaaaagatccaatccaatgcaaaagctccttattcaaacct  
caatcacaatcccctctcccacttccactcggaacgactgttctatagagaaaagggttccctcttcaaccgaaatgaaatggtgaggaga  
gggaggttctttgggggtacccccgggaagagatccagtgagacgggtggcctgtagctcagaggattagacagctggtcagcaaccaggtgtc  
ggggttcaatccctctcggccacagccttccaagggggaaggccttacttccccctgagggtagaaaacatgatcgggatagcggacgtaaagctattg  
aacttgggtatgctcttcttctgcaagtggaatcgtagaacagaatgtgatacagatgataaaaatgcaatgaaacaaggatagcgaacgggttactctct  
aagggtcaaaagcacccttattcaacttcttattcttactaataaagaatgaataaactccccagtaggattcgaacctacgaccagtcagtaaacgccgaccg  
ctctaccactgagctactgaggaacaagggggattcgaacctctagattcaactcccgtctcaaccatgaacaatatgagtcgaagcttcttctgtaactccc  
gaatttctgtagtgctcctccatgcctcattctatagtaagcccagatggtcttattctatttctacttctagcacttctatcttataatccatcccttgg  
gtctattgacataagagatgctattatagctatcttcttatatagtaaaagcaagaatctcagcaaacatcagaaaatgtgcatatagaaaacttaagaa  
agaaaaaaggagaccatgcatgatttcaaatcttctacttagtagtcaagtttctgatgagataaattcggctgtgctggcgtcacttattatgggttcc  
tgaccacttccatgggtcctcttagatcttcttccaaacttggatagggaagaaggagatattcgcactcctggtgttcttattatggggcagctcatgatc  
tcatatcagctattaccctctgcatctattcttctagctaaacgggtggaagatccatccaattggttatatcagactcaaaaaacggatcgaatgtgactga  
aatgcacagcttccaggtatcatttccacgatacctaaaagggtggaatagcgttttgaaccatttccataagagaaggttccattcttggaaatgattct  
atatcaactatagctattgattaaagaagaaaagaactaataagaagtcgaagacgcggaatggtagtgaatagagagaagatttctgttttctgttctga  
aaatattctatctcctagacgccgtagagaattgagaatttctatgcttcaattctgactcgaattggaaagtacggaaggagatccatcttggcaatgaa  
aactacataaaaaactctggacaattcgaatcaggccaagcgtcttaatacatalgcaaaaaatcattattggcccaccattgattagaagattaaactgtatgaa  
tcgctattgtttgatacgaataatggcagttgttcagatgttaaggatacagatgtatccacaatcatttagagttacttaataagcctatttctataccatctctacc  
cgtgaaattctcagccgaaagatgtagatgctatgtttcatttctaaatgatacaatcaaacgggtgatcaatccataaattggatagcaataaataatc  
agcaaaatcttattttatagatagaagaaaagtttctctatcaaaataaaagaatgacctctatcaaatcaattgcatcgataaaataatcaaatccagtag  
tagatgaataattgcaaatfttgggtacgagattagaataactcaaaataactgacataatttttttctgatcagaaaaatagaaaaaagaggagtag  
aaaaatttggattatgfttaagaagaaaaagaagaaactggggttctgttgaattcaagattcagtttccaataagatagcggagactgttccatttggaa  
attacacaaaaaagatttctcagcaagaggtctccgaagacttgggaaacgtcaacgttctgcttatttggcgaagaaaaatagagtagttataagaaa  
ttaatcagtcagttggatattaggagcgttaattcctcgtcgaatttttcttattttatagtagtctatagtagtcttagatttggcattttagagcctcgtttgagg  
aattcatggaataatccatttctggaataatgaaataaggaaagagatagctaccgcttacaagaaaaagatctcagtagtcaatattggcccctcagc  
ccatcaatgcatggttcttctgactgactgttctcgtggtgaaagatggtattgattgtaaccatattaggctatttccacagaggaatgaaaaaatcggcaa  
ataggaaagctacttaggcaggagatagggaattccttaagaaaagaaaaaagaatagaacacagatacaataaaaaaagaataaataagacgaaatc  
gacctcccctacatatttatttcttctctatacaaaaactagcaagacctactcattggtaattccatcaatgacaccctgtcgaaaaactcgttagtctggtta  
cctctatacccaaggtaaaaggctctagtagtaaaatactataaaccgcgattatagaccaactatatactttttttttagttgatgaaaaaatacttttggaccc  
ccttttacaaggaaatttataatccaattctgaaaaaagagtaagcagatccataaaacatatactatgaaatagacaaaaatagctagacttacagaagaat  
tgcaatgtagataaattcatgaattttaggaagaattgaacttcttggaaaaagttgattgaggggagtagccacttggataatggttaattcccctatttcatca  
aaatggattcctatagatcaataaacaaagtacaaagcagtaataaagaaggaatagcatagatttcccggttcatgagtagacaaaaggttttttagtcc  
ccaatgaagactaaaaggacctatcctatttctgtattacatgaatttggatagatttggtaaaaaaagaaactcactctcgtgtgataaacgaaactct  
attgactccttagatatttctcccataacgatattgaatacaacgaactcctttagtactactgtaatttggaaatgaacacgcaataaccatcaaaaagtaagta  
aatatataccgaaacatataaacgcagtaaatcctgcagtaaaagaagctatttccaaaaaagggtgaatataaccaactattactaaggatttcatcttggaccag  
aagcaagcaagggtggaatccacaaaagagaagggtaccccaaaaaacaagttcttgaattggaatgatttcttaaccaccataagaacctatttctga  
ctttatctgtggaatccacaagaggttccattgaaatgaataacagatccggatcccaagaataaagccttcaataagcatgagtgatcaaatggaataaag  
cagcttgataagaacctatcctagactaacatcatataaccaatgagacattgagaataggcttaagcttctttaaatactctctgagcaagagctaaagtggct



cctaagaaaagtgttagtctacattaaagaaatgaactcattatcaaggtagggatgaaaaaggaagaagtcgagctataagaaaaatccccgcagca  
ccatagttgctgctgtataagagctgaaatgggggtgggtcctccatagcatcgggtaaccatacgtgaagagggaattgcccgttcgcaactgcaccaag  
gaataataaaaaagcacacaaaatgtaagcaagggttaattcattattaggaatccagttattgctattttaacaaatccgaaactctaaactactgttatcca  
aaaaaacctagaattcctaataacagacaaaaatcccctacagattagttacaaaacttttgacaagcactcgtgcaattggccgtgtaaacaaaagcctat  
caataatggaacacattcccacaagctccaaaaaaaataaattgtatcaaatggaactgtaaccaatccaacatggaagattgaaaaactatataaaca  
aaaaatctcaaatatccctcatcgtgagacatataatcatcactataataagaaccaggatccctacagtagtaattgtaatacataatagaagtaagcgggctgat  
taagatccaaattcaaggaaaaatcatttgacgggtccaagaccatagatattgatagatagaacttcatttattgtgaatagacaggtgaactgagaatccat  
agctatacttaaaagtaaacactaggaaaagcccatatgagacgaagattttgtgctgttgaacaagaaaaagtccaaacccattgacataaactggaag  
tgggagaaagaggattaccatgcatattgatattgtccataagaaaagaattgcaattttactgaaaatttacttcaattttctataaaatgaaaaagtttc  
cgattaccacaaactaattctatctatttctgaaggaaataaaaaaactagaaattcttaattttcaaaaatttctcattgaaacaatcaaaaaataagaataggtttgtg  
gttaaaagcaaaaagttatgaaataactcgttacctagttattacctaagaaggacttttataaaatacaaaaaaagattgaaactttactttaattttttgtatt  
aaaatgaagcagctccctgttcgtaactcaattgattggaattcaattctggaatacttaataactattgattgaaatttccctctctttatcctcccgtcttatagg  
ggatagggccccafaccttatctgtataggaggtatactgaaataaaattgatttaaatgaaaacctttgtatattctatattataaaacaagctcaaaaaa  
atataatattgtaaaaaactctgtctatccgattagacaaaatgaagtaaaaaagaattcagaatttcaatatctttatgtactaagataaactaagaaaaaga  
agaagatggattgctggcaatagatgtcttcacatacaactagaaaaagtaatttcttttgatggcaggtccaaaaaacgtactcgtatcaaaaaag  
cgtattcgtaaaaactttggaagaaaaagacttattttccatagtaacaatcttattcttagcaaaatcaagatcatttctggcgtcagcagatccaaaaccaaagg  
gttttctcggcaacaacaacaataatagggtttgggataatgaattgacatcccaaaaaatccaatttataatgaaataataggaataatfaggatata  
taataagatttctttatgctcgaattcctggtaacaatcttagaacaacctctgataataaaaaaagggttttgggtactgctcaataatattctttcctatc  
aatgaaactttcgttaataagactcgtataataaaaaaaggggattctattgaaaagtagagatttctgcaataagacttacaactctacatcttctaccta  
taacaaaaaaatgattctatattgcaactgagaaaaaattgtccaactcttcaagtttctattgggcaaaagcaagaattttttgtaaaaaatcgcacgatactac  
caaacgaagctattttaaagattctaatgtctctaaattctatggaatctccaatctcagcattcgcgagaaaaataacttaatttcttaataaacctgttattca  
cttagcccgcatggtgaaattgtagacacgctgctcttaggaagcagtgctcaagcatcgggtcaggtccgagtgccggcagctctgaaaaagaatacaatag  
attataaaataaaatggattcaattgaaattccaattttgaaatggaccttctctctatgctatttgaactttagaacataactaactatattcttctcaacaattca  
attgtattacgattcatttaaacctfattgtctggaacttggggattgctgattcgcagaaaaaggaatgatagccactttttctgtataacaggattcttagtt  
ctcgttgggcttctcggacatttccatfaagtaattatagctcattgatcttcttctatgggctctgtatattctcatatgattcctaagatacagaactctaaaaat  
gatttaagcacaataactacgccgagactatttaacgcaagcctttccacgctgggcttttaactgaaatgcatcaatccacaatactagctgctcacaatct  
cagtggttaatgatgctcagatgatgtfactaagctatgcactctttgtcggatcttattatccggcctctctaatgattagattcgaagaatttagatttct  
ttcgaaaaaagaaaaatgttttaagcaaacattttcttaatgagattgaaatttctatgcaaaaagagtgctttaaagacacctttttcttatttccaattat  
tacaatatcaattaattgagcgtttgattctggagttatcgtctcattagctagggttaccctttaacataggtattcttgggagcagatgggctaagtaggc  
gtggggtactcctggaattgggatcctaaagaaacttgggcatttattctggaccatattgcaatttattacatagtagaacaaatccaattggaaggttacga  
agtcagcattgtagcttccatagatttctataattggatctgtattttgtatcaatctattaggaataggtttacatagttatgttcaattacattaccatcaaatga  
ttacataacataaaccttaaatgaaatggaaaaaactccaattttgtttgatttgagaacccctgaaacgcttctcaaaagggttctcaaaaaatcgcagatagctaat  
tagactctttacttttctgaatttttagtatttccactatggaatagagcggactagtagaagaaaaaaatccatttaggataaataatggataacagagcctcta  
ccctgcaacggatagcggagagaacaaaatctgataaataaccgattcctattactgtaaaaaagatacagattaaaagaaagagttctcggggccggaatcctc  
aaaatttctgttgaaatgaaatagctgtatccatagaaatctgctgtaacatagataaataaaataggagttatatactccaattgccattacaaaagtaatta  
gcattttggcattaacagaaatttggactagtaattagtcacaaaaataactaattcggcaacaaaaccactcattcctgtaaggaagagaagccattgaaaa  
gctactaaacatggtaaaaatttggcattgggatagaacccctcccattctcagataaaacaggcgcattctatcaaacgcttccgtaagaaaaaag  
tgtagcccaataaatacctgggataatattgtaaaatgctccattgagtcgaattggttattggaaccaatcctataaataatgaaacatgtagagagcggag  
gagtaggctattcttttgaattgctggccaagagaaggtgaagctgcatagattattgcatcgtcctattattactaaccaaggggaaaaatagataatgagca  
tgaggtaaacatcattatgacccaatccgtatgctccatcttaataaggattcccgtaaaaagcacaatgtagtctgtaattgcttccccatgggtatctggt  
aacacgtatgtaggggtataatcggcaattgacagcataagcaataaggaagccaaaaataatagatttccaatgttgcaagggtatgattgattaatattctt  
caaatctaactctgttcgtggaaccgtataagcccatacctagaactccgattaaagaaaaaatggaaccactgcagtatcaaaaaataaactttgtagctgaaatag  
agacgcctctcccccccacatgataaaagtaagtaaacaggaaataaactcaactcccacatgataaaaaaaagtaaaaggtctcgcgagaaaaataatcctatt  
tgaccgtatacattgctagcatcaggaatagaataatcgggaattccgggtaaccggccaagctgctaaagtagctaaagtagtcataaatcctgtcaataaaata  
gatcctaataagatccatcattccaatctccagtgaaattgaagacatctatccatttagaatccttttaattggattaagggatcctcaattgaaatgataac  
agaatgcataagcattagaaggaaattcaataaacaataagacatagatataaccactaacgattttgttcccctatgaggtaaaaagaaaaatgaacccgcaaat  
atcggcaaaaacaacagatttgaaccaaggaagaaactcatgataaagtgataaagacaagatacgtttgaccagaaaaagcccgtctcattattttgagca  
caggctctcggtaagaggaatcagacgattcaaggaaattttgtaacgtatcaataagatagccatgctcgggtgtctcaggctcaataaacgcgg  
acacttaaaaaatctgttggcagcgggattcgcactcttacaaccacacaactctcgttcttggcgggaagcaatttctgctttacatccatccaaggat  
catttctaatacatctgttggacaagctgtacacattgagtgatcctatacatgtatcaaaattttacggaatgtgacattggatctataaatttctttcaacataaa  
aatttctgatctgtcaaaatgaaatgtagctatataatcaaatgattgtagacaccagacgaagcaatggtttatccaacttcaacaaataatgcaatatttctta  
atccgtttgtgagaagcatgaaaagagccaagagactgaaatttgggctcaacaatcataattatagcaattgtatatacgaattcgaattgccaataaattggct  
atcgtctttcaataaataatttgcataattcaattgcaaatcaatgaattgcaaaaatcaactaagtaaaaaagaactatggaataactactcaaaaaatagata  
ttctcaataaataatgattcatgtaataattcatattataatattgttccctttgttagaagattctatgctcaatttcaaaaaatgattgattgatacaggtgat  
ttctattacgatggatggaagaaagaatggataatccaatagctcttcagcagccgaagggtataacaaaaatgcgaaatgtctcttttaattggcggctat  
caaatagatcagaaaatgttacgagatttagaattgaattcagtagtaaggtcaaggcatattagacttaaccatgttccgcttgatcaatccatagataccaat

cgaaaataatagactcaaaaaagfacatgctcaaacatcattaactaactcctatcaatctcgatfcatttcaatatggggacaagaattgaaccgattgaatta  
aftagaatagaacaattacacaacaaaagagaaaagaaggattgttgccagtagatgggtttactaatcaaatgtggttcttagtgattatfttagattgaat  
tcttataatfttgactcattctaagtatttcttattgccgagccatagtaattgcacctataaagaactagaagaattatggaatgagttcaaatggaagataaaatcg  
gttgctaaatgaatcccaatftgtgaacgttattatgagacctgttctactattgtttgatctgtatgcccagaatccataccatgacgtatctgggatagtagc  
atagtgaaaaaaggaatggtatacaaacgagtgaaagtgaaccatctccaatagtccaaaaattcttacttttagaccattctgagccattfacgaacattacggcaaa  
tatgatcaagacatttatagctcccacataaataaaggtgtgccacagctacaagtaggaattcaataaaatatagaataaggatatacaacaagaactaatcct  
aacgaaaaagcagaaaaagtggttgtaagtaataaccaccctagacccttagtagaagaacaatccccaaatagcacaagaattcatgtattggcccag  
gtaaatccattatgataagaagaatfaatagataaatttttcatgaaactgactaaaactaaaagattcaaggaaagaaaaagggattaggaattttttgtatattgt  
atataagttctttctatagtagaatcacatcacgaaaatctactctgtttaaaatcaggaataatttgcataagcagtaggtattcgttttcttctatgtagtaagaa  
cttttgatttcaaaaaaattctagtaatcagtaategttctgaattccaagatttttctctgctatttttctttaggtgaattcctaattgttgaattgtgaatcctcca  
ttatggagattggaaccgactcaaaagcaattgattgaattcaattcatgacgatcataagtagaaagttcaattctcagtcattgataaacagtttctggacagta  
ctcaacacaattaccacaaaatatacaaacctcgaatcaactataaataagcaattgttcttataatcttttcaaatctccatccacaagaggtagatctatag  
ggcatacgcgaacacatactcaagcaatcattatcaaaatcaaaagtgattcgcctccggaacgctccgatgaattgattttctatagggtagtgatcgtt  
ataggtaaacgattgtgtgggataaggaattatgaacattgaccaatgaccttctgctgctgattgtttgtgaccataactcatgaaccagttaccatagggaac  
atattcgaatatctatgaaaaaggtatgtttcttcttctgtttgagagaactttgtttgaaaatattcttattgtattgtattcttattatagtgaaacaagttgggaa  
gaagttgtaataagagattgccagggaataggtaaaaaagaaatttccatcaagatttaataactgatccattctcctctgggtaagttccatcttattgtgatagaa  
atgaagagaaaaataagctttagtfaatgtaataagatactcattgctattcctaaaattccaaccattttattcatttggaaaaatccaaaaaggaatataaggaat  
agacaaatcccccgcctaatgtagaactgttacaataaagggaaactaataaatttaggtagaacaagataaaataaacattttgataccagaatattc  
ggtttgataaccctactaattcttctcctcgttctgtaaatcaagggtaactttcacattcgcctcaagaaagaaattgaaaaaacacataatgataccaggaat  
gccaaagattccatccaaaaaacatattttagctgtctcaactatacaactgtacttgaactgttgataatcatagtcgacgataacatcacagttccaccgct  
attcaaaaaccgtacatgaacccttagttctacagctcctctatgatcagaaaaaggaaggtactgtttcattctgttattcttcttgggctgtagtaaatatcta  
agataaaatcatttcaacgtcctaaattagacaaaaggaattctgtctgtagaataataaaaaacgcttccgaattcattctatcttataataatggtacttttctt  
gttctagcaataacttaacttggtaaaaaacactcgttatacaataataaacgaaaagagttgggtattagttcatgaagaattctgtatgaatggataaacgacg  
gaaaagaataaataagatctttttttgtattgcatccatatttcttcttcttccccgaggggtatttaaaaagaaaaaggaataaagggttaattcgttctg  
atagccatttcttaacaagtgaatgggaacatactctggatcggaaatccgaagaagactacttctgctcatttccaccaattcaagtccttattatgattcctttatgag  
gaaaaatatactaatgctttagattcccctactactaatctttatgacttttagtttctaatccctactaacttttgatgattcccttattgattacaacttctgtatcggg  
aatcccttatttggccgtcaagatgatgactaatcaaaaaatcctaaccttgggtaagaatctaccgcttattgttacttccatttttctgtacataggaat  
gagatttttctttactacaataaataagcagttttgttctactatagctatctagtttaacttactaacctgaatatagaataaagaaaggagataaatattcaattt  
taacgaatcgcagtagagatattgctgtacacaaaaagtaagggatttcataactaatagattgagcggcagctcgtagaccacctgaaaaagaatatttattt  
tgagctatattctgccataaagaccataagagcaatactgaaatggcaatccataaaaaaacaccaataaagatccgctaaaacaagcagatcccaaaa  
ggataactaaaaaacttaataaattgatatgactgctatagcgggtccaatgctaaataagggaatattccctcgggatggcaagatattcctttaaagtagct  
tagttccatctgctatagcttgaagcagctccagggggccagcatattcaggaccaatagcttggtagatcgtatcgggatatttcttcttaaccacacaattacgagta  
cttctattgtgattcccagtagagggtcaaatggtagaatccatcagtcctatagacttctttaaataatccaagttcgaaaaagaattgatagcttctactctgac  
cctgtctattatcattcaacgatcaacttctcccataatgatctatactactcaatcgtcatgatatacagccaattcattttttgactagctgaggaagaattgcaa  
aftaataaaaccgggtgacgaattttccatctccaggggaaaagactatcctcctaccagataaattcctaaattcacttttgggcttccactctgcaaaaagctc  
ttgtttgacaattcaaaatgggtgaaggtttttaccaagaatcgatattcaaaatcattcattcggaaatttcttctttaaagcgtcggacttcaaaattctcataa  
gggccccaggaatttttctacagctgttgaataatttgattgattccctcattcaccgattcgtactaaatagcgtgctaatgaatccccttcttttgcattggactt  
tccaatcgaattgattgtaagactgtaaaatcactttacgaagatccattgtattcagaagctcgtaacatggggcccataagccccaaattacagcttcttct  
ccgtaataaaaccaactcctcaactgttccaaaaaatgggattctgtgtaataagttgttgatattcaaaactcctcgtaaaaataatcacagaatcctaaat  
ttatcgtatccataaagcagatcggcagcaactcctccgatcgaagaatattgcatcattcgcatacctgtagcagcttcaaatagatcatatattaattctctc  
tcttaaaaataaaaaaaagagctcgtcgcaccgagatctccataaaggtccaagccataacaagtgagaagctatagcgtcaattctaacataattacccta  
atatagtcgtccttttgggttattgaaatattcctcaagaattctgtgcaattaccgttattgcttctgtaaacatagtagctaaataatcccaactgtttacataaggtaa  
gtattgataaagttcgggtttccgcaatttttccattcctctgtgtaaatagcctaataatgggttcacaatcaataacatcttccaccatcgagagtaacgatcagtcgaa  
gaacaccatgattgagggtgctgaggccatattgactatcatgagatcttttctgtaagcggtagactcatatcctttctccttaattcatttccatgaaaatgg  
attattccatgaattcctcaaacgaggctcatcaaatgcaaaatcgaactactataagactactaataaaataagaaaaaattcgaacgatgaaattaccgct  
ccctaataccaactgactgattaatttctataacgactctatttttcttggcaataagccagcaaacgttgacgttttccaaaagcttctcggagaccttctccgatg  
aaaaatctttttgttaattccaaatgfgaagcaagctcctgtatctattgggtgaaactgaatactgaaattcaacagaacccccgttttcttcttcttcttaaccata  
aatccaaaaattttctactccttcttcttctcatgtttttctgacagaaaaataaaaaattatgctagtttttgaagttattctaatctgtacacacaaaaattgcaat  
tattcatctactactggaattggattttttatcgtatgcaaaatggatttgatagaagggtacattctttttttatagatagaagaagtttcttctatctaaaataaaga  
atfttctgatttatttattgctatatacaatttattggaattgataccgtttaaattgataatcatttagcaaaatgaacatagcatatgcatccatcttccgctcagaaftt  
cacgggatagagataggatataaagaaataggctattaagtaactctaaatgaattgtgatacatctgtatccttaacatactgaaacaactgccattatcgtatcaaac  
caatagcattcacaagtaaatcttctaatcaatgggtggccaataatgaattttttgcatatgtaataagacgcttggcctgatttcaaaatgtccagattttttatg  
tagtttctattgcaaaatgatgactccttccgtaactttccaaattacgagtagcagaattgaaagacatgaaattctcaattctctacggcgtctagagatagatag  
aatattttcaggaacaagaaaaccagaagaatcttctcttattcactaccattccgcgtctcgaacttattatgatttcttcttctttaaagcaatgctatagtttgatata  
gaatccatttctcaaaatgaaaccccttcttctatagaaatgggtcgaaaatcgtattccacccttttaggtatcgtgaaaatgatacctgtgaagatcgtgcaatt  
cagtcacattcagatccgtttttgagtcctatgataaccaaattggatgacttccaccctgttagtaagaagaatagatcagaggggtgataatagatc gatat

gaagatcatgagctgccccataatgaaccaccaggagtcgcaaatatctcttctccataatcaagattggagaaagaagatctaagaggaccatggagaa  
tgtgtgcagaaaccataatagatccgaccgcaacgaccgaatfaattatctcatcgaaacttagactactaagtagaaaagattgaaaatcatggcatgggt  
ctctctttttcttcttttagattttctatatgcacaatttctgatgttcgatgagaatttctgactttccatatataaaaagatagactataaatgacatctctatgtca  
ataagaccaaaaggatggatataatgataggagtgctaggaaagtgaatagaatgaatagaccactctgggcttacatgaaatgagggatggaacgga  
gccactacgaaagaatccgggagttacgaaagaactcggactcatalgttcatgggtgagagcgggagttgaactctaggaggtcgaatccccctgttct  
cagtagctcagtgtagagcggcggctgtaactgactggcgtgtaggtcgaatctacttgggagatttgattcattttaaataagaataaagaattgaataaa  
gggcttgccttgacccttaggagtagtaaccgctcgtatccgatcatgttctaccctcagggggaaagttaaaggccctcccccttggaaaggctgtgggcgaggag  
ggattcgaacccccgacaccgtggtcgtagccacgtcttaactctgagctacagggccacccccgtcctactggatcttccccgggggtacccccaaaa  
ggaacccccctctcagccatttatttcgggtaagaagatgggaaagcccccttctctataagaacagtgcgtccgaggtgtgaagtggagagaggggga  
tgtgatgattgaggtttgaataagacgaccttgcatttggatttggatcttttctgatttcaaaaatgtaaaaagtcaataaagaggttgaagcttttattcttgg  
catcgagctatttccgagaccctcccacagatcgtcaccgagtagagtttaaccacaaatcgggatggattgggtgtgttctctacgcctaggacacc  
agaatcgaacatgaacgagaaaggcatgagaaatattggctagtaattgtaagcccccaattctgactggaaaggacaccaaaggcctctgccctccct  
ctctatctcaagagatggaaaggcagagcttttttggttttcattttcacaagagttgaaacatgaagatagatggcaagtgcctgatcattgatcagg  
tcgttaggaacaaggctcaaatgctggtcgttaggagctcagctcacaatcactgacttccactgacacctttaaaggctcgtctgccgctacctat  
cctatttccatgctctgctcctcctccgtatgggtggagaaccgctcgtctcggctgtgctaccggaggtctaggaaagtcggagagagagcactcat  
cttgggggtggcttactactatfatgctttagcaggtatctctccgacttggctaccagcgtttaccgttaggcacgataactggtaccagagaggtgctcctcc  
cggctctctcgtactaggaaaggtcctcctaactcctaacgccacaccggatagaccgaactgtctcagacgttctgaaccagctcagctaccgattaa  
tggcgaacagccccaccccttggaaaccctacagctcaggtggcgaagagccacatcagggtgccaacccctccgctgatgtggacttggggaagatc  
agcctgttatccctagagtaactttatccgttagcgcgacggcccttccactggcaccgtcggatcactaaggccgacttctgctcgtcgcaggggtgcttgc  
agtcaagctcccccttgccttgcactcaggaccaatgtccgtctgcccggagaaaccttgcacgcctccgttacccttgggagggctacgcccatagaaact  
gtctactgagactgtcccttggcccgggtctgacacaaggttagaattcagactctccagagtggtatcactgatggctcgggccccccggaaaggggg  
ccttcttgccttccacctaaagctgcgagaaaggccccaaagccaatcccagggaacagtaaaagcttcatagggtcttcttccagggtcaggtagctccgatct  
tcacagacatgctatttaccgagctctctcagacagtgcccagatgttacccttctgctggggtcggaaacttaccggacaaggaatttctacttaggac  
cgttatagttacggccgcttaccgggcttggctcggcggcttccctgctcagcttaccacttcttacccttccgactgggagggcgtcagccccat  
acatggtcttacgacttgcggagacctgtttttgtaaacagctcggccggcctggtcactgcgaccccccttggcagggggcacccttctcccgaagtacg  
gggctatttggcaggtccttagagagaggtgctcgcgcccttaggtattctactaccacctgtctcgttccgggtacaggtacccttggtaaggtcgtc  
gagctttctgggagtagtgatgggttacatactcagcggcgtagcgcctgtagagcctcgtgagaagcaatggctagctccaggggctcactcagcg  
ctcagcgttggtagctggacctcggctcaggcatttcttacccttctaccctgaaaaagcagggtcacttgtctcttaaacataaacatcttccgcta  
acctagcctctccgtccctcgtaccaacaagggtagtagacagaaatattgactgttgcctcactacgccttccgctgatcttaggcctgactcaccctcc  
gtggacgaaccttgcggagaaaccttgggtttcggggcattggatttccaccaatgttttcttactaaagccgacattctcgttccgctcgtcgaacccccgttt  
cggctgttctcccttaaggcggaaagctccctaccgatgcaatttgcacccacagcttccgagatcgttagccccgttacttccagcgaaaggcgtc  
gatcagtgagctattacgactctttaaagggtggtgcttcttaggcaaacctctggtcttctgacccccactccttactactgagcgtcatttagggcctt  
agctgtgtagtccgggtgttccctctcagcagatgaagcttaccctcactgctcactggcgaccttaccctgttattttgggtcatatagattttagatttgc  
ctcatttggtagcctcgcgagccccgaccgaaacagtgcttaccctagatgtccagctcaactgtcgcctcaacgacttccgggagaaacagctagctct  
gggttcgagtggaacttaccctaaccaactatccgctgattctcaacatcagctggctcggacctctgcttattcatcaagcttcatctgtgatgtag  
atcaccaggttccgggtccataagcagtgacaatgccctatgaagactcgttctgctacggctccgggttccgttcccttaaccaagccactgctatgagtc  
ggcgtcacttcaacagcgacgcggctcagagatcacttccctccactgcttggagctcagcacggttctacttactaccactgggggttctt  
cacttccctcaggtactacttctcctaccagagatatttagccttgaaggtggtccttctgattcacacgggattccacgtgccccatgctactcgg  
gtcagagcgtaaagtagtagtcttccgctactggactttagccataggggtcggcactcaaccgcttccctagcagcacaacgcttattgctctcccaaa  
ccccgtttcagggtttagctcctccatttgcctcggcgtactacgggaactcgttcttcttcttctggctactaagatgttccagctcggcaggttctctt  
cctgctcaggtttagcagcagcaggtcaaaaagggtgacctatttgggaatcctcggatctatgcttatttcaactcccgaagcatttctcgttctcactcctct  
cgtcttgggtacctaggtatccaccgcaagccttctcttttgaacctcgcattaacgttaaggctatgccatcctaaaggtgctactaaatggaaaggtatctaa  
cgtccatgaatcgaaatcatagatcgaactcggcaattgcaaaaattcgggtctatcatagatccgctaaagttcacgggctggagataagcggactgaaccgt  
gacatccgccagggtaaacaccgctctcagcctccccgacgggttctaccatagaggccaacgatagacaataactccccccgaacacagcttacaac  
ttctactgtagtctcctccaaagagcaacttctcaaaaatcctcaaaaaggtgctgagttggaatccatttcaaggatttctgtgttccggggaatccagct  
acaggagaaccagggaacgggagctctcccccttttccgcccacttctgactttaaacttaagaatgctggtttaaagaacgagtgattgcccttctccgacctta  
ctgccaaccggagagcggacggtaatgtgtccactattgaacagggctatgtcgggtccgtgaccttggagcggaaaggcgtccttggggtgatctcgtg  
gttctcaggggtggagataatggggtcgggtccatgatttcttcttcccttccacatttctcctcaaaagggtgaaaggagatagtcacaaagcttccgcaaggc  
caactgatccttctccccagggatcccagatgagggagcctagagagccgccactcaactatgctccatgtacgatcactagatctgaccaactgcc  
atcctactctctacttctttgacagccatcttttctcagtagagcttctcagtgccatgttctccttcccacttacttagaaaaagtgagccaccggtcag  
gtacaagatactaccattaccgcttgacaattagacagccaaccgtaatcgaacgaccaattgcaagagcggagcttaccactgagctatataccccccga  
gccaagtggagatgcatgaaagagtcagatgcttcttattcttccctggcgcagctggccatcctggacttgaaccagagactcggccgtgaaagtaaatca  
tcgccctacgatccaacaattgggagagaatcaatagactcctttcgggagcgaattccttccgaacgcagcatacaactcctggtgactcgccttcaa  
gtgtcttcttcccccttcccccttaccatggcaagcttgggaaataactcagtgggcagaaaaaggaaaggcgttaagagacctcctggccaacccctagac  
acttaagatcttttcaaacctgctcgtcctccatttcgagtaagagatagataaataagccacatccattgcactgatcggggcgtcgtatgacttagggag

tcgaagaccaagaagtggcttattfataccaagcattcctcttatggctagatccaacctctggctccctgcggaaaggaaaaaagaatttcacgttctctttcaggaa  
gggaggatttaggaaagcttattgattgctgttctccagaccgccgggaaaaagcatgaaaaaaaggtcgaatggtagacatccctccgtcaccccaagaatgaa  
agggtgatctcgtattctgtctgtgaagatgctgttaggtgtccattttccattgaggcgaacctcaacctgtgctcgagagatagctctccatacactgat  
aaggatgatgattctcgagaagagaggaccgtagtccccccccggaccgcccggatcccacagtgatagaaaagttagatctacatgggatctcact  
gaatcggccatctatctcctgagagaaagttgtttgtttcaaacctccgattcaaacaggaggtagcaccatgctaagtgtccttgatgatccacatctcggg  
tcaggcgtgatgagcactgaactatccatgtggctgagagccctcacagcccagcacaacgacgcaattatcagggcgcgctctaccactgagctaatag  
cccgtcgcggcctcccttggaggcctgtacgcaaaaagcagaaaaactccatccctttctttgacatccccatgccgccacaccacacggggggg  
ggcatggggacgtcaaaaagggatctatcactatcaactaattgttccgacctaggataataagctcatgagcttgccttacttaccctaacgaaagaagac  
ttccatatccaagtttagctcagacgtagctgcttcttttggcgtgaaagcagtgcaaaccaaaaataccaataagcataagcattagctccctgaaaaggagg  
tgatccagccgacactccagtagcgtcactgttacgacttcaactcagtcgcaagcctagccttaggcatccccctcttaccggttaagggtaatgacttcaaa  
tgccagctcctatagtgtacggcgggtgtgtacaaggcccgggaacggattaccgccgtatggctgaccggcgattactagcattctgctcatgacggc  
gagttgcagcctgcaatccgaactgaggacgggttttggagttagctcaccctcgcgagatcgcgacccttctgcccccattgtagcacgtgtgtcggccagg  
gcataaggggcatgacttggcctcactctcctctccggctaacaccggcgtctgtcaagggttccaaactatagggcaactaacacaggggttgc  
gctcgttgcgagacttaaccaacacftacggcacgagctgacgacgaccatgaccacctgtgtccgcgtcccaggggcaccctcttcaagaggattcg  
cggcatgtcaagccctgtaagggttctcgtttgcatcaataaaccacatgctccaccgttgcggccccgcaattctttgagtttacttcttgcgaacgt  
actccccaggcgggatactaacggttagctacagcactgcacggctgagtcgacagcacagcacttagtaccatggttaccggtaggactactgggtcttaac  
catttgcctccctagcttctcagtgctcagtgctggcccagcagagtgcttccgctgttggtgttcttccgatcctaatgcaattcaccgtccaccggaaattc  
cctctgcccctaccgacttccagcttggtagtttccaccgctgtccagggttgagccctgggatttgacggcggactgaaaagccacactacagactttacc  
caatcattccggataacgcttgcactcctgtctaccgctgctggcagaggttagccgatcttattcctcagataccgctattgttcttccgagaaaagaa  
gttgacgaccgtggccttccaccctccacggcattgtctccgtacggcttccgcttccgctggaaaattccccactgctgctcccgtaggagctggcgtgt  
ctcagctccagtggtgatcatctctcggaccagctactgatcctgcttggtaagctattgctcaccacactagctaatcagacgagccccctctggggg  
gatttctcttttgcctcagcctacgggtatttagcaaccgtttccagttgttctccctcccaaggcaggttcttacgcttactaccgttccactggaaac  
accacttcccgttgcattgcatgttgaagcatgccgccagcgttcatctgagccaggatcgaactcctcatgagattcatagttgcattacttatagcttcttaccg  
tagacaagcggattcgaattgttcttcccaaggataactgtatccatgcgctcagattatagcttggagttcggcaccagcagtatagccaacctacccta  
tcacgtcaatcccacaagcctcttatccatcccgtcgtcgtggcgggggagtaagtcaaaatagaaaaactcacattgggtttaggataatcaggtcgaac  
ctgatgacttccaccagcaaggtgacacttaccgtgagttatctcctcccccgtcccctcgagaaaagaaatcaacgaatcctaaggcaaaaggggcagaa  
actcaaggccaccttctccggcttcttccacactattatggatagcaataatgggaaaaattgattcaattgcaaccgctctatcgaataaggattgact  
atgattcagccatagcacatggtttcataaactctgtacgatttcccgatcaaacgagcaggttccatgaaagaatcttctgagctatcttaccgactgg  
taggagaagaaccgactcgttattcttaaaaaagaggggaagcagaaccaagtcagatgatgggtcggcccttcttctgcgcaaaagacttaccattcc  
gaaggaaactgggctacatttcttcaatttccattcaagatttctatctgtttccacggccttttggagacctgaacatgaaatggacaattccttcttaggaa  
cacatacaagaaaaagataatgtagccctcccaactacttatttcaattatgaattcatagtaataagaaatccatgctcaccgagacagaatttcaactg  
tatcttctgcaataggcaagattgacctctgtagaaagactgattcctcggatcgatagaggaccaactacgttgcattgccagaatccatgttccatattga  
agagggtgacctctgtcttctcattgtaaaccttctctctgagcccccttctctcggctccacagagaaaaatggaggactgggtccgacagttcatca  
cggaagaaagaactcacagagccgggctgctaactaataagaatgactactaactaataataatagaaatagatactagaaatagaaacgaactaatat  
agataatcgaattgaaaagaactgttcttctgatacttccccgttctattgtaccggggtcttcaatcgtcggatcagataatcccccaacacaacat  
aggatcagaaagatctcggagactcaccacaagcacgaaagccagttagaaaatggattcctatttgaagagtcctaacccgatggataagctcacattaacc  
cgtcaatttggatcaatcgggatttcttgggaagttcgggaaagaaatggaaatgaaataatagattcagagagaaaaggttcttattgatgcaaacgt  
gtacatagaggatagggatagaggaaggaggaaaaatcgaatgaaataataaagaataaagcaaaaaaaataagtcgaagatagaagagccagattcc  
aaatgaaagaatggaaactgaaaaagatccttctgattcctcaagaatgaggggcaggggattgataccgagaaagattcttattataagacgtgattgatc  
cgcatatgtttgtaaaaacaacttctcctttaaataaataatgaaaagtgtcaattagaacatgaaaacgtgactcaattggcttagttagtctcgggacggagt  
ggaaagggcggagactctgaacgaggaagaaagatccctcgaagaattgaacgaggaagcgtatagggtgaaaatctcatgtacggttctgtagaggga  
caggaaagggtgacttctctgacttctcactatcaacccccaaaaaaccaactctgcttaccgtaaaagtggcaggtacgattaactctggattgaaatcactg  
cttataactgtattggccataattacaagaacttctgtagtattagaaaggaggaaggggttaaggatttaccgggtgtgagatcgcatttccgaggagcc  
ctagatgctgctcagtaagaatcgtcaacaaggcgttctagctgtgtagattcttaccagacttctatcttctgagatgcaatcgtgaaatcgtgaaacatgt  
gaagtgtatggtaaccataacgaaagttcgtaaaggactggagcagctaccatgagacaaaagcttcttctaaagagattcgttcgaaacttcttat  
gtccaaggcaaatgaaattctcagggggtttcccttcttctgctgtcaacaacaactcgaataactcgtacttctcagaacaggtccgagcaaatagcaa  
tgattcgaagcacttcttcttccacttcttggaaacctaaaggactgtggtatggataggaataacaggttccgatcctagcgggaaaaaggaggaaa  
cggatactcaatttaagttagtaaacgaattccatactgatctatagatccctatagaattctgtggaagccgtattcagatgaaagtgtatgtacggttggagg  
gagatcttctatcttctgagatccaccctacaatatgggtcaaaaagccaaaaaaataagtgattcttttagccctataaaaaaagaaacggattctgaacct  
ttcacgctcatgctcgtcaggtactgcagaaaaagaactgcaaaatccgatcaatttctgtaactgattagttaacatggtgttaaccgtattatgaagacg  
gaaaaaatcattgcttataaattctctatcagccgtgaaaaagatcaaaaaagacagaaacaaatccactattgttttaccgtaacgaatcgtagagtaac  
tcccaatagaggatgaaacaagacgtaataaaaaagatcgcagcgggaaagttccgattgaaataggatcaaaaaggaagagcacttccattcgttggttat  
tagaagcatcccaaaagcgtccgggtcgaatatggcttcaattaaagtccgaattagtagatgctccaaaagggggtgggggtgccatagcaaaaaaggaag  
cgactcatagaatggcagaggcaaatagagcttgcacatttctgtaattccatgaacagaatctaggtatgtagacacatggatccatctctgacggaaaag  
aatcaatagaaggagaatcggagcatatcttctcgaacaacaacaaaaaggaaaaagaaagagaaaacagaaatcatgtaactaacccctctcggggcgttctt  
aagaataagaagaggaaatcttagaaatagcatggaataaggtttgatccttctatggggattccgtaaatccattccaaaaatcgaacaactgggactttt

cgagattggatgcagttactaattcatgatctggcatgfacagaafgaaaactcattctcgattctacgagaatfttatgaaagcgttctcattgcttctctccaggga  
agttctatttccagaatgatcttaattttggcctaattcttctgatgatcatttaacctctgatcaaaaagatagacctgggtctatttctctcaacaagtta  
gtaataagcataacggccctattgtccgatggagagaagaacctataatgactttcgggaafttccaaacgaacaattcaacgaaatcttcaattctattttatt  
atgttcaactttatgtattctctatccgtagagtacattgaatgtacagaatggctataacagagtttctgttattcgtattaacagctactctagggggaatgttttatgt  
gggtctaacgatttaataactatctttagctccagaatgttcagttatgttctctacctattgtctggatatacaagagagatctacggctaatgaggtactatgaa  
atatttactcatgggtgggcaagctcttctattctggttcatgtttctctggctatatggtctatctgggggggagatcgacttcaagaaatgtgaacggcttctac  
aatacacaatgtataactccccagaafttcaattgcgcttataatccatcactgtaggacttgggttcaagcttccccagccccctttcaatgactcctgacgtct  
acgaaggagtggtgctgctgacaaaactcctacctatctatctctgaggtgttgggtttgcaaaaactccatagatatgagaagagaatgctatccccactcc  
gaccaagacagaactttaccaaaagtattgtgatcttttttcaaaataacaatgaaggtgaagcagggtcaggaaacaagaatctctttatgataaacagatccatt  
ttgcaagctcgttattacgggtagttcctacaagaatcggactaatgacgtatacaatgcttgaattatcgacgtatgctacatagtggtttctatccctcagaga  
ctacgagftaataggagatccggtgacaaaaggtacacctaaatgatctctatggctattgggaacgaatcaaatcagatggttctatttctcaacctttctga  
ctgtctctacggaaccaaggtcgaaaggattgaaaaagtcagtcattcacaacctgatgaaggattctcgaaaaagtaaggattagtagttcttttcaaatcg  
attcgaaaaagaatggattcgtctatatacgcgaggaagtaatacaaaaaaagaagaacaaatcttcttttctttatcacttaggagccgtgcgagatgaa  
agtctatgcacggtttgcatgagagaagaagcgggaatccttttctgactctgactccccactccagcgttcttttctgtacttcaaatgctgctt  
cagcttcaaccacgcaatctctgatactcttttatttctcaaacgaatggcattcttcttggaaatcctagctattcttagcatgattgggaaatcctttgctat  
tactcaacaagcatgaaacgtatgctgcatatctgcatagggcaaacggatattgtaattattggaataattgttgagactcaaatgatgatatgcaagcatga  
taacttatatgctttctatactccatgaatctaggaaacttttctgtcattgtatttttggctactgaccggaactgataacatcgaattatgcaggattatacacgaa  
agatcctttttgctctcttttagccctatgctcttattccctagggccttccactagcaggtttcttggaaaactctatcttctgtgtgaggtgcaagcag  
gcctatattctgtttcaatagactcctttacgagcgttcttctacttacttataaaatagtcaagttattaatgactggacgaaaccaagaataaacctctatg  
tgcgaaattatagaagatcccccttcaagcaaaactccatcgaattgagatgactgtatgtgtagacatctactataccaggaatcaatgaaccccttctg  
caattgctcaggatacccttctttagctgctaggctatttcttagttcaagatccctcttactaactggaataaagaatagtagatctgtccgccccaaatgggaaatg  
ggcgtaggtaatgaactataatcatggaatcactcgtatcagattataagttcattccataccggaccagaccgtgcattcttattatgagaaggggtcatt  
cgagcctatgaaataggaactctgtttacatagaaatccccacgtcttactattttaggtatggaataggtgaatcagacctgttttgcatactatctctatc  
cttatttgggtaccatagcactcttgggcttcttgaatcagaaatggattgtacatctttttagtttgatacataaaggtgctctacggataatgcaaacgaag  
ctattttagtctgactcagcctatagaccgacgacgaactcacaagactccacttctcatalattccatatacatattagatagatatacatattcatggaata  
cgattcattcaagatgctttaggtgaaatggtagacacgcgagactcaaatcctgtctaaagagcgtggagggtcagctcttcaaggcataatcggga  
gaatgcgattcaatgagcattccccgtagaagtattccgaaatctgcctggcgtctctctatcttctgaggtccttaaccactccctgagaaaaggagaca  
gtaaaaaccaaaatagactaaatagcctgaaacgatcctaaaatccctcgaaggagataataaagaacccaaagcagacggatctactgcaaggggtg  
gtctaaagaatcaaaaaggtgctcagaagagatagatgatcccaactctattgctctcgcgtaaaagccttttttacgcgacaggaaaaagtactacgaattc  
cccttttggttcgaatccctgtttgatctttagcgcacgcccataagtagcgaatcgaagaaatcgaacaaacgatcccaatccgtgaaaagagaactccag  
atccagggaagcttatcaaaaaggcttcgacaaggggttttattcgttctttagcaaaaagataaagatcggatagattcgaaccgaattgcaaaagtaatcact  
actatgccagcccaaatcatgatcttaccacttggatttggctctcgcgaaaatcgcgagttgcagagatgagaacctgaaaagcaagatcccgaataagaa  
aacagaaccgaggaaccacaagatgaagactagtagagctcgttttgcattctttgctccttttactcaatgattcattcgaattcccgacaaaaattcta  
tatgtctatctagaggcctcgttctaaatgctacaagatctagtgactggaactcgtggtatfgaccggaatccctttagatggaacattgtcttttcaagtaaaaa  
ccccagatatagaaagaatgaaaaggtgcttctgttcttttctgtggaataagaacctcgtacctaatgaaaggaaaatggaattttcattaggatttgacca  
aatagatcgtccagttctatagaacctatacctaaatcccgatagggctaaagcggaaacgaaaaggatttccctgagatggtaaatgaaaacgattagcccca  
tacgaggtttgggaataagtgatgagcaaggaaatatacttctgctaaagaggatctattaactcataatcattagatcctgttatcaatgcaactaggatcat  
aagtaaacggatcccggttgaatcctttgataccaaggtcatttcttctaaagagaatgatcactatgagtcagactcaatgaattggaatcattccaaatag  
cgagaattagattctgacccctcctaatctctttcaatcaggatccagagaggtgtttcagatcctccgaatattgccatccgaatattttgatttcaatt  
ttctatgatatgttctatatagaaatggttattacgatgtacgatccctgtaaacatccatgctgaatggttaaagcggcaactcataattgtaaaattgctg  
ggttcaatcctgctggatgcacgcgaaccggaacgtccataagcttattgaaactggctctctatccatggaatctatccatcatcatacataacgaattggtatg  
gtattatcacaataacataagaacaataagaactcgaattctatcgaactggaactcagagcatagagggaagtcgattttaggatgaaatcaaatcgaagcag  
tattacagaaaaaagctcttctgttattgggaaagaactcaatatacttttaattgctgaatcgggattcactaaagacagaaataaaagcattgggtcgaactcttctgtt  
aaggtagtagctgtgaatagccatcgaactaccggaaagggtagaagaatgggcctattctaggacataaatgcattacagactgtatgacttacccttcaacc  
gggttattctattccactctagatagaaaaaaactaaaggagaacttaataatcggcgaacatttatacaaaaacactatcccagcagacgcaagggaaac  
catagataggcaagtgaatccaatccagaaataattgatccatgacggcaccgttgggttaaaggtcgaattccaaggaatcattaccgcaaggtcataga  
gggggagggtcataagcgcctataaccgtaaatcgaatttcgacggaatcaaaaagacatactggtagaatcgaaccatagaatacaccctaatcgaatgcgta  
catttctctacactatggggatggtgagaaggatattttacatccagaggggctataaattggagatactattgttctggtcaaaaagtcttatatcaatggg  
aaatgcctacctttagtgctggtttgaactattgattacgtaattggaagtaaccaatagggttacgacgaaacctagaatcgtactgatccaattgactacct  
ctacgggatagacctcaacgaaaactgttgatgaacggcagcaaggtattgattcagtagtctctatagaaaattattgactctagagatggttaattggaga  
agacaaaattgttgagcagcacaagaccggaagcggccctgtttcaagagaggagacgggttattcatttaattgatggtcagagcgaattgaaaag  
ctaagcagtgtaattaaagacccccgggggaaaataggatgctctctacgttaccataatagtagaagtatcgaactaattcatagatgactcgtatgcaatgc  
tacatgaagaacataagccagatgacggaacgcggagacctaggatgtagaagatcatacatagcagattcggcagatttggattccttctatatactcactcat  
gtgacttctatcactatgattcatalaagatccatctgtctagagatcgtcatatacatctagaaaagccgtatgcttttgaagaagcctgtacagtttgggaaaggggtttt  
tgagagaaaagaagaatctacttcaaccgatatgcccttaggcacggccatacataatagaaatcacacgtggaaaggggtggcaattagctagagcagcag  
gtgctgtagcgaactgattgcaaaaaggttaaatcggccactttaaagattaccatctggggaggtccgtttggtatcccaaacctgcttagcaaacgtcgcaaa

gtgggfaatgtggggtgaacaaaaaaagtgggtagagccgggtcfaagtgtggctaggtaaacgccccgtagtaagaggggtagttatgaacctgtggacc  
acccccatggggggggtgaaggggaaagccccattggfagaaaaaacccacaaccttggggttatcctgcgcttgaagaagaactagaaaaaagaaaa  
atatagtgatagtttattctctgcgccgtaagtaaatcgaactaggaatatgaaaattgcattttggaattgcaataatgggatggcgaaacgacgggaattga  
accgcgcatgtggattcacaatccactgcttgatccactggctacatccgcccttattccagctaaaaggatttctctttttccattcatattattctatttctga  
cctccatactcgcgatgagatattggacatcgaatgccactttfaaaatggaaaaaaaggagtaacagctgtgacacgaaaaaaacgaatcctttgtagctcatc  
atftattgcaaaaaatagaaaaggtcaatatgaaggaggagaaaaaaacaatagtaacgtgctccgggcatctagcattctaccgcaatggtggccatacaatc  
gcgattcataatgaaaaggaaacataacattttacatacaaatcctatgtaggtgcgcaaatgggggaattcgtaccaactcggcatttcacgagttatgaaagt  
caagaaagatactaaatctcgtcgttaactgaattcagaatagaagattcaaaataaaaaaaagaata

>O.meridionalis\_IRGC105298\_cp

cccaatatctgtctcagcaagatattgggtatttctagcttctcttcaaaaattgctatatgttagcagaaaagccttatccattagagatggaactcaagagcag  
ctaggctagagggaggtgtgagcattacgtctgcattacttccataccaagattagcagcgttgatgatcagcccaagtaataaacgcgacttggctatca  
actacagattggftgaaattgaatccgttttagattgaaagccatagactaatacctaaagcagtgaaacaaatcctactacagcccaagcagcaagaagaagt  
taaagaacgagaggtgtaaaactagcatttggaaagattaatggccaaaataacctgagcggccacaatattataagtctctctcttggacaaatctgtaacct  
cattagcggattcgtttcagtggttccctgatcaactagaggttaccaggaacctgcatagcactgaatagggaaaccgccgaatacaccagctacacctaac  
atgtgaaatggatgataaggtattgctctgcctggaatacaatcataaagtgaaggtaccagatattcctaaaagccataccatcagagaactccttgaccaa  
tagggtaaatcaagaaaacagcagtagcagctgcaacagagagctgaaatgcaacagcaatccaaggacgcataccagacggaaactcagttcccactcacga  
cccataaacaagctacaccaagtaagaagtgtagaacaattagctcataaggaccgcatgtataaccactatcaacagatgcagcttcccaaatgggtaaaa  
gtgcaatccgatcggcagaagtaggaataatggcaccagagataattgttccgtaaagtaaaagaaccagaacagggctcacgaatacatcaatctactg  
gagggcagcagtagaaagcgtataataatcagaaggtgcggcctaataaggtgaggtatcaaaaacaccgaaactccgatgaaagacggtttccggtgctag  
ttaccagttgcagaagcgacccacagcgttcttctgcgtctctctaaaattgcagctatgtaagcttggtttattcaaatgcaaggactcccaagcagcag  
tattaactagaagataatagaagcgttattttaaactagataatatactatataccaatgtcaaccaagccagccccgacagttgtatataccatacaaaaaattta  
ccaacccaaaaatttftgaaatgaagtgaatgaaaaatcaaaactcagattgctccttctagtttccataggggtgcccgggactgaaaccggaactagctggat  
ggagtagataatattcctgttacaatagagaaaaaaccttccccaaatcgtccttctgattttcattgcacacgactttccctatgtagaaataggctatttctatcca  
aagaggaagctactaatttttttagtagtaagttgattcacttactatttattatagtagacagaacattcagaatggaactgtgaaagtttaccctgatcattatcaat  
catttctagtttattgtttgttaatgattaatgaaggattcaccagatcattgatacggagaatataccaataccaatacgtcactgtgcgatccaggaagaa  
aagtaagttgtttggcgaacatcaaaagaaaaactgtctcttccgtaaaaaatcttctaaaataaccgaaccaaccattgcataaaagctcgtaccgtctttat  
gtttacgagctaaagtcttagcgcgatgaaagtcgaagtatatactttagtcgatacaaaagcttctttttgaaagatccactgtgataatgaaaaagatttctacataccg  
accaaaaccgatcaagaatatacccaatccgataaatcggcctaattgtttactaataaggtgcccgatccagtaaaaattggcctttgctaaagatcaatgaga  
ggagtaaacagggacttggatcgaatttttctttagtatctattagaatgaattctccagcatttgattccttactaacaagaatttattgtactctgaaaagtac  
cccagaaaatcgaagcaagagttgtaattgttttagatggatccttgcgggtgagtcacaaaagagaaaatattgccacaacggacaaggttaacatttccat  
ttcttctcaaaaagagattcctttttagtcaagaattgccttcttctgatacgaacataatgcataaggggatccataacgaaccatattggtttccgaaaaaaagca  
gggtacattaaaccccaaatgttccatctctagaaaagatgattcgtccagaaaaggtccggaagaaagtaatcgaagcaagaaagattgtttacgaagaaacaac  
aagaaaaatcatattctgatacaataagattatagaaccgaaatagcttttatttttcaaaaataaaaatggatttcattgaaagtaaaaaactattccaattc  
agtagtagttgagaagaatcgaataatgaaggatggaacatcttggatccggattgaggagttgaaagcagatccaaatggatagatagggtatttct  
atatgtgctagataatgtaagtcaaaaattgtcttcaaaaaaggaatattgaatgaatagatcgtaaattcgaactttggtatttcttctccggacaagactgt  
tctcgtagcagaatgggatttctacaacgatcgaacccccagatagaatctgagaataaaactcagaataaaaaaattgttgaatccaataatcgtcttggtt  
aggatgattaaccaaataatccaaaattctgctgatactcgaatcaataaccgtttcaagtagtgaactaaattctgttattagaaccaagaatttcgacaagtt  
cggaaaccttaatccataatcagggcaaacacataatgactcctgaaaagtagtgggtagacgaaatattgctagaaatttaagttttctgaataacctc  
aattttccatttatttctacttgaatcagagagagaaaatattctcgtttatcaaatgggtgatacatagtaaatatggtcagaacagggtgttgcatttttaataca  
aaccttggggaagaaaaggagctaatccacggatctttccgctcttttctacaaattgtttattgttcttaattacaaaagagaacaaatcctttattttgacg  
gccaattgctctttgacttgggatacagctctttatcaatatactgcttctttacattcattcaataactatctatttttaacgtctaattagatcagggttcttcaattaag  
aaagtaagctcgttctttgtttaccagaattggagccagcctctatccatttattcattagaccagaaaatcagaatttttttaccattccaaaaatccaaaataag  
aaattgatttattacgacatgctatttttccattacccttggatcagctcggctcttatagactctaccaagagctcggacgaatttttcttcaatcaaatgtg  
aaaagatcagatcgcacttaaaagccgagctacttaccattgagttagcaaccagataaactagatcttagatagcgaatccaaaatcaatggaattaca  
ccgcacacctgtcaaaatctaaaatgcaagacattaaaagaaagatttaccattgaaaacactcagatacaaaaaggaaacgggtctggttaaatctacta  
aggttaaaagtggcacaatcagatcgtaaaattgtcattttttgacttttatttaataataaataaataaattctgtatgagagtaaaaaaagagggacaacctacc  
atftgagcaaatgtaggcaaaaacctaataggagtgaggataaagagacttaccatctcaaaattctagatgttcaatggacttgtcaatggaatacaatgg  
taagaaaaaattagatagaaaactcaaaaaataaaggcttatgttgattggcagacataatccagcaaaaataggattaagaagaggcaaatatttct  
aatagttagacaacaaggatactagtgagcctctctagtttttattcatttagtcttcaatcaactcaaaagttcttcttcttaagaatccgcttcttcaaatat  
cagaacagttctttaggtgagcacttttcaaggaaatagagaatagctggaacattaaacaagttgattctttatcggatcaaaaaactacttttcgaagatc  
tctccttctctcagatcgaacatcaattgcaacgattcagatagacgcttattggatagatgtagataaacaagccccctagaacgtatagagggtttctc  
ctcatacggctcagaaatgacttgcattatttccgtacagaaaaacaatcttattactcatgactcaagttgactaattttagttagacagactgaaagaaaa  
aatccttgaattttttgagctcctaaactcttcttgcctactctgaacaaatcacttttattccttattccggctcaattctattgttagacagttgaaatcgtg  
ttactgttccggaaacttcttcttattgtgaaactcctgggttaaacattctcgggaattctattcttttcttcaaaaagagtagcaacatacccttttctatttc  
cttcgataaagcatttcccttctatagaatcgaatagagcattgattctgatacatttaatacaaaaagatttcccatcttccaaaattggacttcttctatttta

accttttgattctatattatctgatttctatattaagggtagaatgacaaggtggcctaatttattagtttctactaaccttagattcttcccttgataaaaaataaattctgt  
cctctcgagctccactgtgtacttacttagcttacttacaacaaccagcgaaaaatcgggtcgggacgaatagaacagactatgctgagccaaagacatttca  
ttactatgaaaaatggtgtagcaaaatccacaatcgatcgtgctctcaagtcgacggttcttaccacatcgtttaaacgaagttaacataacattctctaa  
ttcattgcaaaatggtatagggaaatgatccaatagatggaatcatgaatgctcattggtttttgtataactaattcaactgcttctgctatctatgagaaatag  
aataaaagaatagattatcgggaaagactccgcaagagccaafttatiaaccatattctatcatatgaatgaaatagttcgaaaaaagggaataaaca  
gtttgctaaagacttattatggaattccatcctcaacagaggactcgaatgatcaatcctgaatgataagagaagaatgactcttccaacaaataaactatc  
aacctcccgttaatttaatttaataatattagattgcaatctatcttccataccattttccgtaacaaaactaattaactattactgtaaacattgcaatgaaaaa  
aagtttttgtagtatagaattctgatttctcgaactcgaatccaaaagaaagaaaaaatgaaagtaaaaaaacgacttctgtaaaagtaaaatgaggtctt  
gcttttacttattttctttacataaaagaaagcaactccaatcaaaatgaatccattctatcaacgagcagttcttattcttaccgggagatgatttggatatt  
taaaaaatcgaggatcgaatcgttttcgcttaacaaagaaagaaaaagaagaaggaaccttttactaataaaatactataaaaaaatttactctatcataaact  
atctctaccataaaaggaatggtctcgtttttatacaatgtttctacgtcaagtttaaaatttttcatgaaaaaagatttcaattgactggactgacactggattatgttt  
ctgagacagaaaatgaacgattagactgcatcgaatcaaggtttataagaaaaatctcttaataaactttatgctcgtgcagaatacaatagattcat  
cttctgttcatcagaaaaatctgggacgggaagattcgaacctccgagtaacgggacaaaaccgctgcttaccgctggccacgccccattcgggtttatg  
cgacactaataaacagattatgttttcttctgcaatcctactcaataaataaaatggggggtattcttctgtaggattctagacatgcgaataatagaaatc  
caaaaaatgactgattatcattggaattctatagatattatgaaagtcgaatcttccactctcattgagatgctgaatacaaggaggtatttgggttggaa  
agtcggaagaaaaaggtttgactcctctttcccttagaaaaaactcaatcaaaatcaattatctactctacaagaacgaaacgcttgtatgcctaat  
atacttagtttaacctgtattgttttaactgtttatctcgaactgattttctcgcctaaatgcccgaagcttatgccaattcaaccaatcgtggattttatgctgcat  
acctgtactctttctattagccttgggtggcaagctgtgaaagtttcgatgaaatcttactactctgctgccaatgaaatcaatgattcattcaaaaaatcga  
aatggataagagccggaagcttataatgaaacctcgaactcaaaatcttactactgaatgataagcgaatcaaaatggtatcagccttctactccc  
tgcactacgttgagcaggtatctttaggtaaccgcaatcctaaactaatttattgataagagtgcttattataaataaactctgcaatttttcaaaaaatgattttgc  
atfttaggtgtcaaaaaaacaacaaaccatcctagtggtttgtgtgtaaggaacgggtaactctatcttcaaaaaaacttggagattatgtaatgcttactct  
caaaacttttgtttatacagtagtatacttctgttccctcttcttcttctgattcttctatcaatgaccaggacgtaactctggcgtgacgagtaaaatccaaaatfttct  
ttacaaatggatttgtttacatacttactacgagaaaaatccgggggtcagaactcctccaatcgaagtcaccaacgatccgagggggcgaagagaggggat  
tcgaacctcggtaaaaaaattgtacaacggattagcaatccgctgctttagtccactcagccatctctcccgtccaatcgaaggtttccgtgatagacaga  
ggcaagaataaacgattgcaaaaaatcctcttttcttcaaaacaaaagtcaaaaaatattatgccaatccattttagttatcttcttctaatgttaataaaaa  
aaagaaagaaatctcttcttcttaattctaaaatggatattggctaaagacaatcagatagatttctcttagcagcatttccatagactgttataataaaa  
caagcaggtatagaaaaaactcttttttattatatacaaaagcaaaaaagggtcttatacaaacaccaccataaaatggaagaaagataaaa  
gtaagtgagctgactcctgaaatgagcctctatccgctattctgatataaaatcgaatgtagatgaaatgataagtgattttttgtattcttagacttagaccac  
gcaaggcaagaatctcgtctattactattctatcttctgactagatgttctataggaataagaagaaatcgaaccccttccgctacacataaaaaatggattcga  
aagcaattttcttcaatcttactttttcagaatcctattttgttctataccatgcaatagagagcgaatgggaaaaagagaggtactttttctattttcccttaa  
aaaataggcttcttgaataggaatcatggaataatcctgaatccaatgttttcttatagtataagaaaaactaattgaatcaaatcatgattaccacgacctc  
ggctgtgaccccatagataaaatgcaaaatcttctcctcagaccattgaaaaaagcattgaaacgagaaaaatcgtccacagataatctatctgtagccttggga  
agtgtataaggtgctcggaaatggtgaagtaattgaataggagatcactatgactatagcccttggtagagttactaaagaagaaatgattatttgaatattgg  
acgactggttacgaaggaccgttttgtttgttaggatggtcctgcttattcttcttctgcttattcgtttaggaggttggtttacagggacaacttttgaacttc  
ttgtataccatggattgagcttctatttgaaggttcaatttcaaccgacgagttccaccctgccaatagtttagcactcttcttctactatggggc  
ccggaagcacaaggggatttactggtgtgcaatagggtgctgtgacttcttctcctccatggggccttgcactaataagtttcatgttacgcaatttgaact  
tctcggctgtcaattgcgcttataatgcaatttacttctgcccactcgtgtttttgttccgattctctgattatccactggggcaatccggttcttctc  
ccgagtttggcgtagcagcgaatctccttctccaaggattcataatggacgttgaacccattcattatgagaggttccggaggttaggagcgcg  
gctctgctatgcctattcattgggcaaccgtgaaaacacttattgaggacggtgatggtgcaaatcctccgctttaaaccactcaagctgaagaaact  
tattcaatgtcaccgtaactgctttgttcccaatcttgggtgttcttttcaataaacgttgggtacttcttattgctatttaccggtcaccggtttatgtagag  
tctattggcgtatcggcctggctctgaacctacgtcctatgactcgttccaggaatccgtgcagcggagatcctgaattgagacttctacacaaaaat  
ctttgtttagctgtcgtgaccaagaaccaccggtttgcttgggtggccgggaatgccagacttatcaattgtcgggtaaacacttggagctcagtagcccat  
gcagattaatcgtattcggccggagcaatgaacctatttgaagtgcccaattctgaccagaaaaaccatgtatgaacaagggttatttacttccgacttag  
ctacttaggttgggagtagggccgggagaagttctagatactttccgacttctgtatctggagacttctatcaatttctccgactttaggttccggtggca  
ttatcacgcgctctgggaccggagactcttgaagaatctttccattcttggttatgtgtgaaagatagaataaaatgactacaatttgggtattcacctaatttgt  
taggtataggtccttcttagtactcaaaactcttattttggcggfatatagatactgggctcctgggggagagatgtaaaaaatccaatttacccttag  
ccccggtgtatttggttacttactaaaaatccccctttgggggagaggttggattgtatggtggatattagaagataaattggggacatgtatggttgggtt  
atgtgtatttggcgaatttggcataatcaacaaaccctcgcattgggctcgcgtcattgtatggtctggagaagcttactgtctatagtttagccttact  
gtcttggtttactcgttgtttgtctgttcaataatacagcttaccgagtgagttttaggacctactggccagaagcttcaagctcaagcatttcttagt  
tagagatcagcgtctggagctaatggtgatctcccaaggaccacaggtttagttaaatactaatgcttcccaacgggagaggtattttggaggggaaa  
ctatgcttttgggacctcgtcctcatggttagaaccttaaggggccccaacggttggactgagtaggtgaaaaagacatacaacctggcaagaacgac  
gttcggcagaatatagacctgctccttaggctcttaaatctgtgggtgctgtagctaccgagatcaatgagttatattgttctcctagaagttggttagc  
tccattttgtctagattcttcttttggggccatttggcatgaggaagagccccggctgctgcagcaggttgaaggaatcgtatgatttggagc  
ctgtcttcatgaccttcaactaagatttctatttatactgttcttctgttctgctcgttattctatctagccgagccattccttctatgaaag  
aaagataaggggacagaacaaaaaaacaataaagaacaacgatttcaatcgaagaaaaagagagaggaagcaaaaggagagagggattc

aaccctgatagtctactagaactataccggtttcaagaccggagctatcaaccactcagccatctctccacagcctaactcttattttatctacaafaagaacafagc  
catacgaaatgactcactaacctctagaacaatctcaatacaaatccctttcgatataatctgtatactgtatccatgtatacaggatccgctatctgcttggaaat  
aaagcataaaatccctcaaccatcatcaataaaaaaagtggtgagtaataagtttaagagaagaatcaatgattcatgattaaaccctcctactcttctgatt  
ttattacaattttgattaaagtgaggatcaaatataatgtagtcactttattgtatgtaactggagattagaatgactattgtttccaaattgctgttttgcatt  
aattgtgactcctcagctttagcttagtgaccctgtattgtctctctgatggttgcaacaataaaaacggtgtatttccggatcatatttgattggactg  
gtcttctgtagctattctaaatctctatttctaagtgttttagtatttagtagcccagatcaaaaataaaaaaggccggttattcggattgtgagacgcaataaagc  
caatttgcgcccgaaatgattgacagacaattaataaaaaagaaaactcaaatagaaaatgaaacggctgacccagacatagacggctgacccagcgggat  
ataccataaaaatagagcgtagcgagcgtagtcaatggtataaacatctccttccaaaggagaagatagcggctgattcccggctcgccagctfaatttagt  
aaggactatgataaaaaatttagctacttttataaagttaaggtgttagtctagtaccgtacccttactatcttagcccccttgcacccactcaaaaaagagc  
actacagcgcggggaatcgaactcggcaacagggttcctaaaccggggattaccgaaacaacaacagcaaacagcttttaaagggaagggatagact  
gtgccttcttctatttttcttctgtcaaggtaggggctgtgaggttcccttctgtgtagcaagttactctgcaacctgctcaatftggccttatagggctgggaa  
ctaagtgaataaaaaaggggtgtatagcctcggcaaccaccagccctctacatctagacaataagaatgtcctttatacagactgctaagtgcggagacgggaat  
cgaaccctgacccaaggttatgagcctcgtgagctacaaactgctctactcggcctggagcgtggaaatcgggagcaaaaaaggtgaatacagccctc  
accatgtctagacaataagaatgattttatagcaaatggagcgggtagcgggaatcgaaccgcatgtagcttggaaagctaggggtatagtcgacgttggg  
tgattattataacgtctcaattcaaacgaacatgaaatftgattctcggctctttagggattctaccactaacatcaatgacgctttttgctgaatggaa  
ccaagctctctgctttctagatgacctaaagtaggagatagaaatgcttaaatctatctaatcttaactctgttcctaaattcttaaagagatctgaggaa  
aagaattgggttccaccgagctgaacaataatgctgatggtctagcaacaaactaccggttttagctatttggcttccatttcttttaacaaaagagattg  
ttactgattgaaaataatftttgtatcttcatccatagcttactatattttaaattggaatcctaatacgaataatgcttccgactctgtactcataatc  
caaatcctatttgggtgagcaatftcaattgcttggtagcaaatcgcgaatctcatttctcaatgctattgagagaaaaggaataacctttctaag  
aactaaagttttcatcggatataaaaaacctaagggagccttaagtatacttcaaatcagttattaatagaacgaatcacacttttaccactaaactataaccgcta  
catgtaattatgatacaacgctacccttgcgaaggtagccattcagaagagatgctaactcctcttagttaatgaacagagaaggttctctacagttagcgggt  
ggtactctgacgcgcccttcttactttcttttcttgcgaatgaacaaagaatftgggaaagaaaacatctccccacttatcatgaaatctggccatagaga  
aagcgtgagatgtttttttatcatagactttccctatgctctgagagaacaataaactaaagaaaagccacatagagccgaaggattactgtatgta  
aagaagattctgaatgtctctgcttagtcgattctctccgttfaacttttcttcttcttctccactcaattctagtttattagattctgtttaaagaatcaagaagatgaat  
agaactaagaacacacaaaaagagcatatagcccagacactaccaaaaagtcttccaataatcatattgggtatctgtccctcctttcttattagatgggg  
catgttggattttccatatacctcgaaccttaagggtccagaaccctcttttctgtatgttccgaaaacggaaaacccctgaaccaggcagctataatc  
tactgcccttttacaagaaatgggtataaaactccactacgttgttcaaaaatgcacaaatcagaatcccttgagaatftcaatgaccccttcttaagaagaag  
aggctacctctgaaaatcgttcaacaatccgcttaagaaaatftgcaaaatgaaactgaaggttttccagggtgctgtttaaattgttcaacctctacc  
aaaacagacaagaagtatatcactgaaaataatccagccatagggatataagggcgcgaatcgttataccccaccaattagaggaaataaaacataaaf  
ggagaaaatfttcatgataagatcagccaatagaagaaaaagtcctcaatfttccagaccgttctgagcatgtaaaagcgaatagcctaagataaaaaaccctata  
ctttgtcaagtataagagagaatgaaagatttcttatttctgatttcttaagatttttgaacctgacatgaatagacttatatactcgaatatacagatataa  
tgtacattatggagtagacctataatgggaaatgaaagtgctcaatfttgaattgaaataagaagccctttaaactcagtgtagagtaatgccatgtaaggcagataatg  
catcggtcaaatccgataaaggcttttttacttagtgtagtaatgccgctgaagcgtgagcagtggttcaaatccgatacagctatttctactaaattcatt  
cacttcttcttttgaatfttctttttattgaaftgataacttagtcgagatgcatgttatttagtttaaacactaagcgaagcaggggggtgtaattgcaaaaa  
agaattggactcttttctattagatcaatcaactaccgctactgaactaatatagaatccctttttaaactatttcttattcctatctttataaacgaatttcccta  
aaaaagtaggggatgacctgaatfaactaacatcaactaaaaaaaactctcaaaaagcataatggaaaagtaggaaggactccttctgtagctatgtatact  
cttcgagtatattgacaatcaaaaaactgctcactatcattatagataatgaggagcgttgatagcgcctatcgtctagtgcctctatctgtagtgggtc  
aggacatctcttcaaggagcagcggggtgactcctcctggggtaggagattatgaaaggaggttaatacatagattatcaaaaaccctagaataatc  
ttctgggtcagtcggcgggttaaggggacggactgtaaatcgttacaatgcttacgctggtcaaatccagctcggcccaaaatctagggtctcgtga  
atatgattaaatccatttttctcctataaaaaagaatattgatccatagaaaataaaagaaataaaggataaaaaaaaagggaataatcttctaactatatactctt  
tcttctcttcaaaaacaaagaccttttctattggtattgaaagtggtcttctatctatttttagcgaataaatacgcgacatactagttatgctattctcactatacc  
ccatagatagcgggtgatgtagtatattcgtctatttcttagagtaggacagcgaatcttatttcttattggttccattaaagaataagatgccatagcccccg  
cggggttagtcaattggctcagacccgctgcaagggcgaagctgagggtcgaagcccctgcaagcgaactaagggtcccaatgaaatgagaaatca  
tcttcttttccatgaaaaaaggggcaggaagcaagatcaatacctatgggtaccctatttcttatttttagtctgctttctcagtaaagaggagagatg  
aggaaftttttactactctggtgatagcgaagacatacatatcacgtggaaggatcctctatgtatactattcactctcaacctgaattgattgatag  
atccgatatcataatattgaaftgattcagttattatcagaatgaagcctcctcctgaatttacaggatcccttctctccatgggattacatcccagattgctga  
aaaaaaagagggttatggaagcaatattctcgaatftattgctactgatttctattctgttctactgcttttacttattatgtaaaaacagtcagcaaaatgatt  
aattggaagtcaataatcattgaagaatgaaaaagggattaaataaaaaaaatcaagcttfaatgaaggatccgggtgaaatcaaaaagtggtgagaa  
aaactacatagttttctaccacacttgagctttctattatattctgaaactacatagaatagattactagattgaaatagtagtcaattcaattcttttctactgc  
atccactaatttcaatcaagcaaaatgaaaaatcattggaggagaaaaataatagaaatgactatagtaaaaagaaaaagtaaaaagaaaaaacag  
cgaatcttcatgctfaaacatgctgcgaatgtttcaaaaagacataaaatfttttaagaactaagaataagaaaaagtagtaaaaacaaatggaatgtcggat  
gtgggaaatagctccgcggaagaaaatcaaaatcttattatagaactttttaaaccatgggtcgtcttagtagcattatgaattgtctcaccgctcttctatttct  
atttcttatttactatatagaatagaaaagattatagaaatgaaaagatagaagacttcttcaagagtcttacaggagtgaacaaaataaaagaaa  
gagagaaaagataaaatgctcgaatgaaatgcaaacggcaatfaaaagaaaggtgatacaaacatcgaactactcaatcaatagtagtatccctagag  
ccactcctccccactactagtgaagagaaaaatgaaagactaccattaaagcagccaagcgactactatcatcgaatattatgctcctattctatgaa  
ggaattattctactattgatgaataatcatagtagaatacaagggtacagatcaaaaagggttctgacctaaggctatggatgaatcagttcaaaagaattactttaa



caaatcttagagfatttctggtagaattggggagcattaagtataaataatgatacatagccctttcttattaataaaagaataaggaaacgctatctcatccctattggfat  
cggtttggccactactgctaaacaaccccagtttgaggaaagacgggtggttctcaaaatccagtatgccgagcctgttattctctgccccacttatgcg  
gggtgcaaatgtc gattggatcagctataagcctaagtattttatgatcaggcggcaccagattgaaactgggataaaggattgcagccctgcctfacc  
gcttggccatgcccaaaaaatagctataaaatcagaaaagagcaagtattcatgcacgttctactaaaactaacttctttttatctaacttaacttacttactt  
ttccaatcttttcaaaaaatctattcatgcttttttggatccagtttcgattattctctcaaggattctatcttaaacacacattgctaacactagaaaactccctttct  
ttctattgaaatgaaaaggagaaaagtggatttctagtcacaagctacaaaataaagaaacaaattggaaccattaactagaattctcttttttgaattcggatctc  
tcccgcctgccatttaagcataataaaagacaatggatttatgcctaatccgtatataagtaaacccaggtccgaacagcattatctatggatcccccttatgta  
catactctgtggagaatgcttctaattttcattgcaataatcttgaataaaaaaagaaaattgacttggctatgtggagggtccagaactagattggatgactta  
aaaaagacttactttattttaggattctacaacgaaatcttatatcttataattttagaaaatctactactacgaaacaaaaaagaacctcaaatctttttgaaattaaact  
aagcgtgctatttcaatcgaactaaagtcaactttctagtgttataaattatcttttggttttatcccattcatagaaaaggagaaaaaatgagaatctttgccgtcc  
aatctaagaatatacaactgtaagtggcagaattttttcagggtctaggaatgtttatcactttcatttccatttgggtggaccctgggaaatcgaacttctgtt  
gaaattgtctctattcatatgatgaaatacatatgaaatacgtatgtggagtcccagaaattcatgtgatttagaaacagaatatagattccataatgctagatc  
atctgtagggattgatgaagagtggctgataatgaaattttctcagataaacaggaaacttaagattaagatgctccggaatgaaatgagggatgtccacaata  
cccggatttagcagatccaatcaggggattttgtaggtcattaatcaaggctggcagaagaactggagaagttccaacaataaagatccagatcacgaaattc  
attcaatttttgcgaaagatcaattgtagaaccttcgataaaagaaggatgctgtgatgaactcactattcttccgaattatagatccggcgcgatta  
atfttgggttcgatgtcaaaagcaaacatttctattgaaacattcctataatgaattccttagaacctttataataaaggaaatataccgaattgtgatcaatcaata  
ttgtaagtcctgttattactaccgctcgaaatagaccataaaaggaaattctatctacaccgggactataatcagattggggaggaagatcgaattgcaattga  
taaaaaagaagagatgcttccctaatgctaaaggagaagagattgtagtcaaaagaaaagctatttggagttttacaacaatttgcctgtgtaggtgggacct  
cctgaaatttcttcttccctaatgctaaaggagaagagattgtagtcaaaagaaaagctatttggagttttacaacaatttgcctgtgtaggtgggacct  
ggattttcggatccttatgtgaggaaatcaaaaagaaatftttcaacaaaatgtgaattaggaaggattggtcgaacaaatgaaatcgaagactgaaatcttgat  
acctgagaacagcacttctgttaccgcgagatgtattggcgtacggatcttggattggaatgaaattgaaacgggtatacttgacgatgacgatgaatcact  
tgaataaataacgtatcgttgggtgctgttacaagatcaattcggactggctctgtcgtttacaacatcggttcaaaaaactatccgtagatgattcaca  
gtcaatcaaaaccgactccacaactttgtaactcaactcaacctcattttataaactactctacgagaccttcttggatatacccttatctcaagttttgatc  
aaaccaatccattgacacaacgggtcagggcgaaggtgagttgttgggtctggaggattgacggggagaactgcaagtttccggagccgagatattccatcc  
gagtcactatggcgtattgtccaatgacacgtccgaaggaaacacgttggactactggatctttagctattcatgcgagaattgatcattgggtgggagcctgag  
agagtcattttatgaaatctgagaaagcaaaagaaaaaagagagacaggtgtttattatccaataagagatgattatagatagcagcaggaaatt  
cttctcctgaaatcgggtattcaggaagaacaggtgttccagctagataccgcaagaatctctgactattgcatgggaacagattcatgttagaagtattttctt  
ccaataattttctattgggggttctctattcctttattgagcataatgatcgaatcagacttfaatgagttctaataatgcagcggcaagcagttccgcttctcggccga  
gaagtgcatttggaaactggattggaacccaacagctctagattcgaagggttctgtatagccgaacgcgagggaaagatcatttactataatgcacaagat  
cctttatcaagtagtgggaagactataagatttctttagttaccatcggcgtctcaaaaaatacttctatgcacaaaaaacctcgggtccgcgggtaaatcca  
taaaaaagacaaatfttagcggaggggctgtctacggttgggtgggaaacttcttaggaaaaaacgtattagtagcttatatgccatgggaaggtacaatttga  
agacgcagatttaattagcgaacgttgggtatagagatattatacttctttcacatccgaaaatgaaattcagacggatcaacaagcgaaggtccgctgaaa  
aaatacaaaagaaataccacatctagaagaacttactccgaaattggacagaaatggagttgtgaagttgggctcctgggtgaaacaggcgatatttttagtag  
gtaaatcaacgctcagatagcagcgaatcgtcctatctcgggaagctgattattacggccatatttggcttggatccactcaaaagaaacttctctaa  
actaccgatagggtgaaagagcagcgttctgatgtgaaatggatccagaggatccccctgacataatgggtctgtatataatttcaaaaaacgcgaaatcaaag  
ttggggataaagtagccggaagacacgggaataagggatcatttcaaaatfttgcctaggcaagatagccctatttcaagatggaacgcctgtgatggttt  
caatcccttaggagtagccctccgaatgaatgtgggacaataatttgaagctcgtcggattagcaggggatctgctaaagaacattatagaatgacacccttga  
tgagagatagcaagagcctcaagaaaactgttcttcagaattatagaagccagtaaacaaaaaataccgtgggtatttgaaccagtagtaccgggaa  
aaagcagaatattgatggaagaacaggagaccctcgaacagcctgttctaataagggaagctctatacttaaaatattatcaagttgatgagaaaatccacg  
gacgcttactggccctattcattgttacacaacaaccggttagaggaagcgaagcgggggacaacgaatagagaatggaagttgggtttagaag  
gatttgggtgctcatatttacaagagatacttataaactgcatcttatagtctcgaagaataacttaacgctacgatctgggaaaacgagtagcctaataca  
cgagatcctccagaatcttctgagtgcttggcagaactacgatcttggcttagaactgaaccattctgtatctcagaagaacttccaggttaataagggaag  
aagtttgatcggaaataaacttaaaacttcttatttcttattttagattgaccaataaaacatcaacaactcaaaattggactcgttccccctcaacaataaaggcttggg  
ctaacaacactacctaattggggaagctgtggcgaagtcacaagccctcactttcattataaaaccgataaaccgaaaaagattgatttttgcgaaaga  
atcttggaccataaaaagcagaatttggctgtggaatctcagcggagcggagctgaaaacgaagcgaagatttggcaaaaatcgaggatgaaattgtt  
gattctggatagaaatgatacaaatgggatacatcaaacctcagatgtcccgtgactcatgtgtgattttaaaggcttctcctagttatctgcgaaatcttttagataaa  
cccctaaagaaattggaggccctagtatatggcgttctcttttctagggccagtgctaaaaaaccaacttcttactgattacgaggtttatcaggatgaaattcat  
cctgtaaccatagatttcccccttttttaccagcctttacaacatttcaaatcgggaaatgacagaggagcaggtgctattagagaacaattagcagattg  
gatttgcgaatttttagagaatcctcggctgaatggaaggaaatagaagcaggggtatagtgagatgaatgggaagatagaaaaagcagaataaagaaaag  
ttttttgattagcagcatgcaattggcgaacattttatcaacaatgtagaaccaagatgattgttttggcttattaccagttcttccccaattaagaccattg  
ttataggtctgggataaagtagtactcggatattatgaactttataagagattatccgtcggaaacaacatctgctatcttataaaaagaagtgaattagcgc  
cagcagatttagtaattgcccagaaaaattgtacaagaagcctgggatacacttctgatagtggtccgcgggcaaccaacgaggatgtcacaataaagt  
atacaatcatttcaagatgaaatgaaagtaagaggggaggttccgcaactctgctggaaacgggtcattactcgggcttctgctattgttgggtcct  
tcaatttcaatcaatgtgggttacccttagagatagcaataaagctttttagctatttgaattcgcgatttaacacgaaacgtgctacttcaatgttaggattgct  
aaaaagaaaatttgggaaaaggaaccattgtatgggaatacttcaagaagttatgaggggacatcctgactgttgaatagacacctaccctcatagattagg  
catacaggttccaacccttttagtagaggggctactattgtttacaccattaggtgtaaagttcaatgcagactttaggggatcaaatggctgttcatct

acctttatccttggaagctcaggcggagctcgtttacttatgttttctcatatgaatcctctatctcccgtattggggatcctatttgcgfaccaaccaagacatgctta  
tcggactttatgtattaacgattggaaccgtcagggtatttgcgcaaatagatataatggtcggaaactatccaaccaaaaagtaattacaataataataatccta  
agtatacgaagataaagaatctcttttctagttcctatgatgcactgggagcttatagacagaacaatctgttagacagtccttgggtccgatggaactag  
atcaacgcgtcattgggttaagagaaggtccgattgaagtcaaatgaatcttggggacttatcgtgagattatgccactatctagtagtgggaaatagaaaaag  
gaaatcgttctatatacattcgcaccactctgtgcataatttctttatagagaatagaggaaaccatacaaggatttagtcaggcctattcatacactatcaaaaa  
ggaaagttagattcggggatgcccttfcgagggcattccgatttcgctagatcatcattttgccgcacgaatccagattgagattgaggaaaggaagtaactaag  
tttctaatcactgactcagcccattgtcgaatcctactcagcaattgtcgaattatactcagccgaaaaagggggtacttattatggcggaacgggccaatctgtg  
ctttcataataaagagatagatggaactgctatgaaacgacttattagcagattaatagatcatttcggaatgggatatacatcccatactgcatcaataaaaaacgc  
tgggcttccatcaagccactactacatcatttcattaggaatcaggatccttitaacaatcccttaaggatggttagtccaagatgcggaacaacagagtttctt  
tggaaaaactattattatggggctgtacacgcggtagaaaaagttacgccaatccgttgaatctggtatgctacaagtgaatattgaaacacgaaatgaattcga  
tttctcgataacagatccttcaatccagctatctaattgtcttttcaggagctagaggaatgcatcgcagggtacaccaattagtaggtatgcgaggattaatgctggg  
atcctcaaggacaatgattgattacattcaaaacgaatttaccgcagggacttcttgacagaatataatcttctgctacggagcccgaagggggttagat  
actgctgtacgaacggcggatgctgatacttacacgtagacttgggaagtagtcaacataatttgcgtagaagagattggtgactactcaagctatttctgtg  
agctctcaaaatgggatgacggaaaaacttttgcacaacataattggtcgtgtattagcaaacgataatatactggttcacgggtcattgccactcgaatcaaga  
tattggaattgggttagtcaatcattcacaacccttccgagcacgacatttcgagcaaccaatataatagaaaccccttacttccggagcacatcttggat  
ctgcaattatgtatgctggagttccactcatggcgtatcgtcgaattgggggaagctgtaggtgtattgcgggtcaatctattggggagccagggactcaacta  
acattaagaactttcactactggtgggtatfcacagggggtactgcccactgtacgatcccctcaaatggaaaaatcaatcaatggggatttgggtcacccca  
cacgtaccctcatggcagcctgctttctatgtatatagacttggatataactatcagaatcaggtatctacatagtgtagtacttctcaaaaaagcttgattcta  
gtgcaaaatgatcaatagtgaatccgaacaagtaattgcggagattcgtccggaaacgctccttgcattttaaagaaaaggtacaaaaacatatttaccgaa  
cagatggggaatgcactggagtagcctgatttatcagcggcgaatatacaatgtaactctcgtcattacaaaaaacagccattttagatattgtagtaagt  
atgtcagatctagatagcttctttctgctccacaaggatcaaatgaacttattctttctgtgacggaaggtatattcttggcctctcagtgctgatgat  
gaggtaaagacatagactgttgatacttttgtaaaaaagatagggaaatcttgatttaccacgcccgatcgaatctgccaatggtcatttggattttgtctatcct  
ctattctcaaaaataatttattttagcgaaaaagcgaagaatagggtccattccattacagtatcatcaagaacagagaagaaccaaatatcctgttttggga  
tttcgattgaaataccctttatgggtgtttactgtagaataactatagttgcttatttgcgacccacgatacaaaaaagataaaaaaggttcaggaaattgtaaa  
tataggacctagaggacgaatataggactcagagaaaactcagagaacgaataggggagccagaaaacgaatataggaccgagaggaagaatgtaaa  
accctagaagcgaatataggactcagagaggagatgaaacccatagaagatgaatagggatcccagagaacgaatataaacctagaagatgaatagg  
aatcttagaggacgaatataggactcagagagggaatccgaggacgaatagggagtcagagaacaatataggccccgagaggataaataatgacactttag  
aggaaactcagaggacgaatcgggacttttagaggaagactcagaggaagactcagaggacgaatagggaaacccggaggaaattccgtcaaaaaagg  
gggtttttagtgatcagaggaaacaaaagaatttagtcaaaaatacaaaaagaagtagatcgttttttctatttccaagaactgcatacttccgagatcctcat  
ccctaaaggacttgcacaatagattattgaggtggatcacaaactcaaaaaatacaagaagtcggctgggtggattggtcgaagtagaagaaaaaaagcca  
tacggaaactaaaaatctttctggagatattcatttctgaagaggcggataagataattagggtggcagtttataccactagaagagaaaaaaaagattcgaagg  
atcaaaaaaaagggaatgggtctatgtcagtggaaaaaaattctcaagagcaaggaaagatatttggtttggctcagctgcagtcgctgatgaaatgaacga  
agggagaattagcaacactttccacaggatcttgcaggaaagagggtaatctcaactcgaacttgcatttatttctcatgaaaatgaagtaactcaaaag  
aattatcatacgaatagcaatcgttcgaacttgccttagtattgaaattgggaacaagaagaaaaagaggagctcgtccttctgtagataagagcaaatggt  
ctgattcgcgatttccaaatgggttaatacaatccactatttctgatacacgaaaaaggtatgatagcaaggtcagggactgattcctcataatagggttagatc  
cacaataccaattcctttattccaagcgaagatcaatcacttagccaacatcaagaagctattggtaccttggtaategaaataaagaataccaatcttggatg  
ttgtcggactcaactgttctgaattggtttttaaagaattcaaaaatccaatggggtaaaagaatcgaatcctagaatcttattcaaaaatttgggctcttctg  
aaatttctggactttagtactattgcacctagatatacgaatttcttctacttacttactaacgataatcagatcctgttaaaaaagcatttgccttgcacatt  
gaaacaaaactcaagactcaaggacttaaacactctttaaataatgaaatcaaaaggacttcaaatctcagatgtaacatcattggtatcattccagftaaattg  
gcacttctccctcatgattcttgggaagacatcagcaaaaatcacttggacaatttatttgcgaaaatgtatgctattttaaactgcacataaaaaaaatcaggtca  
aatttctattgaaatagattccttgtataagagcagctaaagccttattggccactacaggaactgttcatggtcattatggaatcctttacaaaggggat  
agggttagttacgtttatatacgaaaaagcagatctagtagacataacgcaaggtcttcaaaaagtagaacaatctcgaagcgcgtcaattgattcactatcgcgga  
atctcgaagaggaatgaggttggaaatgagcgtataccaagaattcttgggggtccttggggtattttagtgagctgagttaacatagccaaaagtcgatct  
cttggtaataagatcaaaaaggttatcagatccaagggtacagatccataatagacatagagattattatagccaagtaacatcaaaagtcgggtttccga  
agatggaatgtctaattgttttccactggggaatattgactattgcgagcagagcgcagcaggcgggcttggatgaatcagatattatcgggcaatctattgg  
gaataacaagggtttccctgaataccaaaagttcatatctgaagcaagtttcaagaactgctcagttttagcaaaaagctgccttacgaggtcgtattgattggtg  
aaaggcctgaagaaaacgtagtctgggggggattatcctgttggatccgattcaaaaattgtgcaccgttaccacaagacaagaacctttatttcgaaattc  
aaaaaaaactatttgcctcggaaatgagagataatttcttccatacagaatgatttcttctgattctgacgtaacaacaattctatgagacatcagaatcacc  
atttaccctattatgatgtaagatacaaaagcagatttttactttaaactagattttgacctagaacgctaagaggttagatttctatttttattttaaaga  
agtttagtaattcattaggttatgctataccatgtagaaggttccatcggacaattattatttctcaagctatttccgctcttcttaactctcgaagaaagaat  
cgtaatggaaggttaggataaaaaaaagaaaatcaaaaggaaggttggaaaaatgacaagaagatattggaacatcaattgaaagagatgatagaagc  
ggagttcatttggctatggtattagaatggaatcctaaaatggccccctacatctcggcaaaagcgtaaaggtactatatacaaatctcctgataaccaccgtt  
ttatcagaagcttggatttagttttgatgcagcaagtcagggaaaaagccttctaattgttggatccaaaaaaagagcagcggatttagtagcatcagctgcaata  
gggctcgttgcattatgtaataaaaaggttcaagtggtatgtaaacgaattggtcattactaaaactagacttctcaatttagagatttaagagcagaagaaaaga  
tggaaaaatccaccatcctcaaaaagagatgtggcaatctgaagagaaaattatctacttgcgaagatattcggcgggatcaaatatgacgaggttgcctg  
acattgtgatcgtctcagcagcaaaaagatataatagctctcgggaatgtccatttggggattcctactatttcttagccgatacaaatgtgaccagatcctg

cgaatatac gattccaccaacgatgacactatgacttcaatc gattgattcttaacaaatagattttgcaatfttgagggccgttctctatafaagaaatcattga  
ttaagaagaatgtaattctgggcaactgcgtagattatggaactactactattctttttgtttgcatagaaaaagacggggaatattgatataatagagggtat  
tgatataatattatcatctgatgtgattcttgatacctaaatataagattaactctacgttgctgagttgagaaaaagatggtgaatcaaaaagaattctttttgaagtc  
atftttatcaggggacaatatgaatattatacctgttccattaaaactcaagggttatac gatatacggcgtagaagtagccaacactctattggcaaatag  
gaggttccaaatcatgcccaagacttataccttctgggtc gtaaffactactctgtaggttcagttatcatactgttcgcaatccacaacatccaaccgatgg  
tcagaattctcgaatatgtccttgagttattcgagacttaagcaaaactcagattggagaagaatagcgtccctgggtccctttattggaactatgtccctttatfttt  
gtttcgaactggcgggtgctctttaccttggaaaattatacagttaccccatggagaattagcagc gccacgaatgatataaactactgttgccttagcttactca  
cgtcagcggc atattttatgcgggtc ttagcaaaaaaggattgagttattc gagaatataataaaccaactccaatcctttaccaatatacatatagaagattcac  
aaaaccattatc gcttagtttcgacttttcgggaatataatggcgatgaattagctgttggttcttcttttagtccccttagatgtccataaccggc atgtttctgg  
attattacaagcggattcaagcttatttttgaacgttagccgcagcctatataagtgatccatggagggtc atcattgaattgactatgtttcaaaatagctttttt  
tagcttaactcaatcatgcatggttgcggaaaattcgttggttgaaaacaaaatagttagaattgcgtatgaatatacaatctagattgtagaagagagaatagg  
ctatattacggaattgcaaaacaaagtataatagccattagggggggcgagtcaggttagatctatatacctttatgtctataagttcagtcattttgtatgggttcca  
ctttaaggaaftttttgaatccgattcaatagaaaatgagaaaatacacaacaaaatagaagaaacaaatgatattggaatattatattccaagttagattcattat  
ctaaccgatataatgaaatcggattccatcaatc gatcagcatattgtatcaattggatattcgtatttaattcctattggatctgattaggtc gattccatagg  
gttcttctctatttaccctttattatgaattagataggggaaaaatagaaactcaaggatcgaagaggaaagaaaggaatgaaatgaaatcagattgg  
ttgaaagaagaagaaatagaaatgtagtacacaacactctaatgattagaactaaaaaggagatcgaagcagttcggagaattcagattatcgtttcaattgt  
acttttagtactctgtccaatagagcttagaaatagaattcttgggtgattgtatccttaaccattctttttttgacacgaggaactcatgaatccactaattgctg  
ctgcttcggtattgctgctggattggccttaggtcttcttattggccttggagttgcaaggtactgctgcaggaagcagctgtagaaggtattgcgagacagcc  
agaagcagaaggtaaaatagcggactttattgcttagcttattggaaacttaacaaatattgactagttgtgctgactgttggcctttttattggcaaccctttg  
ttaactcaaaaaagaaaacgagtccttttagattagactttcttcttttttagtaattggattttgcttctgcaattcaatatacaacttactcaatattactc  
ctagagttttctattatggggacagacaataccccacccaggaaatagctgattgggatgataattagaggatattgctccgtcttctcccccctttgttta  
ggcgagtgaaagtattttcttttttttaggaattttgggaacattcaacaaaggaggtctttcacaggtcaaacgagatttaagactaatctaaaagaaatcta  
aattgaatctatttctataaaaaaattgcataaaaaaacccgatcaaaaaggcgagcgaagtaagtatc gaaaaacttggctttgttcgtctatctataagagg  
agagcatafgaaaaatgaaccattcttctgttttttagctactggccatccgctgggagtttcgggcttaataccgatattttagcaacaaatctaaatctaaactg  
tagtggttggtgattgatttattttgaaaggggagtggtgcgagttgtctattcaagaatagattggatctatccggctgcactttagaatatttttagtattttcgaata  
aataagaaaagggtgcacgatctc gacgaattactctgaataatgcagaaatcatatgaaagaaccatagcattcgcgacctattgtaaatcaaatcaacttga  
ttctctatagaccaataatagaccattaacacggttaaagctaaactgcttgaagcttagc caaaaagggggtactctttctacaactatattagattagtaaccaat  
gctttaaacaggaaatagctaatgtagaattatctgatatagaacactatatac gataaaatggttgaacttactagaaggggcacctgcccctttttatccaatg  
ccgaatcagcactatgtataaaaaaggagaaattttggaattgaaagaaaaagtaggaattctatcattttcattttctatttagttttcttaattgaattg  
aaaatttaactaaaggc caatacaataaaaaaacacttctgcccacgatagattttatctagcgggaagagctcttaattttatctagcttataatgggttc  
ggtatattgaaatataacagaaaaagaggggtagaggataggtcattacattaaaaaaataggaagtagccatagcaaaaaagaaaaaggagcgtgga  
gagccaaatgaatc gaaagattcatgtttgggtcgggaagagatcataaaaattgtaaacataatagcaaggtaatctactttcaaaaagatttattagataatc gaaa  
acagaggatcttgactattc gaaatc ggaagaattgcgtagaggaaccattgagcagctc gaaaaagctc gaatc gattacagaaagtc gaactagaagcg  
gatgagtatcgaatgaatggatctctgagatagaacgagaaaaagcaaaattgattaatgccacttctattatgtttgaaacaatagaaaagctaaaaacgaaaccc  
ttattttgaaaaacaaaggcgatgaatcagggtccgacaacgggtttccaacaagccgtacaaggagctctaggaactctgaatgtttgaaatccgagttac  
attccgtacgatcgtgctaataatagacttctcggggccatggaatggaagagttaaatattaggecttgaacttctacttcttttagaatttaggcattattttccc  
ttgcttcgaaaaaaaatagtaaaagaacactaatggcaaccctc gagtcgacgaaatcataaaatctccgcaacgtattgaaacaatataatagaaaagtagg  
gattgagaatcgtcgcgtgattcaagttggggatgggattgctctgattataggtcttggtaataatgtagggcaatagtcgaattgcagaaggactag  
gggtattgctctgaattgaaatcaaaaatgttgggattgattaatggcgatgggttagatatacagaggcagttttagaaaagcaacagggaagaaattgctcag  
ataccgtgagcagggctacttgggtcgtgttataaatgctctgctaaacctattgtagggagagc gaaatgtagcttcggaatctcgttaattgaaatcctg  
tccgggtataattccagcgttctgtatgaaccctcaaacggggcttattgctatcattc gatgattcctattggcgcggctcagcgaaggttaattattgggg  
acagacaaaccggcaaacacgtagctacagatacaattctcaatcaaaaaggcgaagatgtaaatgtgttttagctatcgttcaaaagcagcctcctcgt  
gctcaagtagtaactactttccatgaagggggccatggaatacactattgtagtgcgtaaatggcgattcccctgctacattacaataccctcctctatacgg  
gagcagccctggctgattttatgtaccgcaacggcactaatttaataattatgatgctctccaacagcacaagcttaccgcaaatgcccctctataagaa  
gacccccggcgcgaagcttaccaggggatgtttttattgcaatcagccttttagaaagagccgtaaaatattcttttaggggaaggagatgactgct  
ttaccaatagttgagactcaatcggagacgtttccgcctatattcctactaatgtaatctccattacagatggacaatattcttaccgagatctattcaatgccgaa  
ttcggcctgctatattgtgggtatttccgtttccagagtaggatccggcctcaaataaagccatgaaacaagtagctggcaaatcaaaatggaattagctcaatc  
gcagagttacaagcctttgcacaatcgcctctgctctcgataaaacaagtcagaatcaatggcaagggggcagcattacgagaattgcttaacaatccaagc  
aaatctctccagtggaagcagatagctactattatatac ggaacaaggatattctgattccttagaaattggacaggttaaagaaatctgtagattacgta  
aacacataaagatactaaacctcaatc caagaaatatactcttagcaagacattcaccgaggaagcggaaatccttttaggaagactattcaggaacaactc  
aacggtttccctcaggaacaaacataaattttgcacgtctactctgttagtagaagtagtagagagaatcgttagaaagattttcattgaaatcagcaaaaa  
gtttcttagtttttagtatagtattttaaagaatagatagaataagattgcgtc caatagattgaaactatac caaagggttagaagacctctgtcctatccattagaca  
atggacgtttttcattttcttctttctttctttctggaccaagagaaaaaactgttagaccaaaacttttaggaaagaaaaacaaatgcatatacaaatgtag  
gatgcatatac ataaaagaaatagtagcgggttagtggaatcgaaccgcaacccacgggttagcctgtcagctaccaactgttctatcctgttaact  
aaagagaggggaaactagtgataaaaaggggggtgaatcagcccctaccatattctatacaaatagaatagccatttatacagaatggtaaaagggccttctta  
cgatcatcaatccagaatccatacaaatc gaaaagggtattttacttaccactggatctgttgcaccggtaacaacatgcataaacatttctcgaagatgt



ctttcttatcaattgagaactctatccatagagfatagagccatactttcttctctattttgattctcgtgaagtgtcctttctctacagctgataggcaaaatcg  
ttgtttgacgatccctatgfgaagaagccccctttctagtaaactagaaaatgacccctttcttattttctctatagtgagatagtcgcacgtaatgacagatcacg  
gccatattataaaagcttggtgaagaaggggttcgtctagtgcccggaaataatattccaaagcctttgatgctctccattgctgtgtataaggcctatgttata  
gagtataaacttcgatcatagggatcaatttctagtcgctgagcttcataataatttgcaagctccgcataatctctcggattgagccaacatccgttacggctgtt  
cgttctattcaaaaaatcctccgtccaaaaccgtacatgaggtttcaccctacacggctcctcctctgtacatagtactaagcgaaaaaatctagagaataaaaatag  
aattagttccatctcattatggaccgaaaggggctggtattttccaagaatctctagccaacctcccacaaggggttttctaacaccaatgaattctattaatgcta  
gaggaaacgatagctccaagaattctttgtctcaacgctcctatttagaggaattagccactcaacgatctttgatgggtataggggtatccaagtacaacttg  
atgggtgtttgtatccaaccattctcccagccctgataccaatcaggaaaggggttaatttcaacaaggttttctgtttgattcctatttctaggtgtagtgcctttatc  
ccctatgctactattagtagtagagtaggattagcctgtaatacagaacctatctgtaggtgaacctttcgtcaataactaaaatcacaattgaaagcatccgag  
gccgctcagtcgaggatcacgacagaagaggtgttagttcacctcacctccctaagcgtgggtttcccttactaattgggtttctccgcgaacccccgctctt  
tctcgtaaaaccgggtgtaggttaggctcaaaaaacaaaaaaagagtcacatcgcacattctataataagtaaagccctttttcccgagggtgtcgggaat  
tattcgcataaaaatattggtacaattgagaaggtcttacaatgaaatttccattatatacgggatctaggcataatccaacccattctatctatatagaattcttt  
cattcctcacaataacataaaaaaaacaaatccattcaattctataaatcgcctctatgctccaaatgataagagaggtatttctgctcagcccaattctctc  
ttttctctgtttgacaagaagagatagaaaatattgactaagattggatttccacttcttcttctcaacaacaacttctctcaactatttgcatttcc  
aaagtcattaatcgtccataccctatttctattgattgtaggggtaggafacttatgcaaacagaattctaggggtcctttttatcgaataagaagaatttctccattc  
tctttctgtgtgggaaaaccacaaacttttcgagggagcggaaattcctagtaaaaaatctggaccggtccacttagatgaaaaggaatttctctatca  
atagaacaatggaactctcgcgcggtgtggtgtacctgtactgcaggaataggaaaactcgtattcactcagttttttccataataagattatggaggagagatg  
cccagcgggtcaagcgtagctgtagcattgttagctttgtttaccgaggggtcgaatccctcttctccgttttcttaattcagcaacgttaattgattacatg  
tatcaaatcaaatgacaatttattccagcaataatacaatacctttatttaataagaattctctataccaataactatgtagtaaaatacacaataggaagaacaaa  
aaacaaaaaggaactcctaggttaatccatttctgttaggtgaaatgggaaaatacgaattaaagccttagctcgaatttagttcgggaaaaggggaaagga  
aattctatgaacctttccgttttcttaagtcaagttgacgagagtaattctcaactaacaactcattttttgagaccgaccactcctatccagatttttttact  
agtcctttatattgcaatgtgtcaatcgtcaaatgctttgcaatttccccggctcggatgaagcaatagaatttgaaccagacgtttgatctttggtatctctgtagt  
aataatctcggggttgaacgaaaactgtgatatacactatacaccattcaactaaaatgctctatggttaactaattgccggcctcgggaatggtgagcca  
tacctaactgaaaaaggatattatccaacgcatttcaagtaattgtagtaaaactgacctgttgaacttttgcctttccagcagatgtagatatactaaatgtagt  
ctgtagcaccataatgaaaacgcaatttctgttttctgaaagcgaatacgaatgatttcttttccagaatggaatttctttcagacttccggatttaggtgtttc  
tagtgagctcgtgtaagctccagacggcgtatttttaaacgaggtcctcgataacgggacatgaagactcctttttattgaaattcattttacacaattaattca  
ttgtattacattacagaatacagcaaaftaaactgaattaaagtaaaagataaacagagtaaaactactaaaagtaccacaaaaaatggaattcacaacatct  
gaaftttgtatataatattttattttgtttgtatctagcaaaattgtagggtagaacgacataatagatcctggcttctccatttaactcgggaaaaagaggtattttg  
ttatggaacattgatagaaaaaaagccgactatcggattgaaaccgatccctcgcattacaatgcgatgctctaacctctgagctaagtgggcttacataaca  
gaaatagtgtaacaaatagaatattgtagataggaatccgtaaaatgtagatcttaatttaattcttagctattaactagttcgaattggaagtctacttagaaa  
aaaactactagaactcataaaataaagttagatagatttttgaacttcttttctcaattcgcacaaatcttttcaataagaatctattccaatttctatattgaa  
agatatttttaattgatagctcggagcaataatcaatacatggaagaataataataatataacgaaaaacataaaagagaacatcgaatttctgtattttca  
gtccatcattatagacatttttgagatattttgtttttgtatttgcataataatgattaaatatttcaactaagagaacatagaaatcagaatgaaattgctaattc  
gattagcaaaaaaagaatgaatcaagcgttatagatgattttgaaactctaaaaaaggaacgcggttaggtggggagagaaaaaccttgggatatattgatt  
cgattgaattgcaatacatcaacgatagaatcaattcaatgctgaattgcaataagcggagctctcaactagagacgaaccgtagactacatagagtaaatgaa  
tcaacgattcaaaaaaactaacagatggaggaaattgcaacaaggaaactcgtctcaaaaaaagaaatggggatagggcaaacggtagacgctacgga  
cttgattgattgagccttggtatgaaacctgtaagtggcaactcacaattcagagaaacctggaattaaaaaggggcaatcctgagccaatccatgttttga  
gaaaacaagcgttctgaaactgaaccacaaaggaaaaggataggtgcagagactcaatgaaagctgttcaacgaatcaggttaattacgttgtgtgtagcgg  
aactccttcaaatagggaagaagggcttcaaatcaatacacacgtatagatactggcatagcaaacgattaatcacagaactcatalcataataggtcttt  
aattccttttaaaatgaaaatggaatgattatgaaatgaaaatcataatfttttgaattgttgaatccattccaatcgaatattgagtaaatcaaatcctcaatc  
agtttcgaactcttttaaaagcggattaatcggacgagataaaagagagagtcctcctacatgcaatactgacaacaatgaaattctagtaaaaggaacatcc  
gtcacttttaagctgtgaggttcaagctcctctatccccaaacctcttttattccctaaacttagtatttctcgttttttttaataataggtttaaagattcaatggaatc  
atttctttttatagatcggcaaggaatgtcgtatttaactcgtatfttaaatattttaaataagcgtttctttgtacaatgcatagggactgccccctccccatccaaa  
tttggatattgacatagatacaaaactctactaggatgatgcacaagaaaaggtcaggatagctcagttgtagagcagaggactgaaaatcctcgtgtcaccagt  
tcaaatctggtctcgtcacagaaaaagggatctccgaataggtattgatacaaatacctcagatgggttgggatacatattcgttaataatagatagatgtaga  
ttttctatcaagtagataaaactcaaatagaggcacttctttctcatttttgcatttcttaattttctattccgctattccgacaaaattttttattcttcttattctta  
cttctctagttgttaagtaatgcacggttacaagttcgtgtgtagggaacttcttgagtcacatattttctgttcacacgaaggaaatgaatgtagtttccaac  
gaaatgaagccctttttgcttagtctatctgaacctttgtataattggaattaaftagaatgtaataggtattctgttctatctaggaacagagcgtaaaaatctctgac  
ttgcataaaactggagttgtgtataagtgagcatgaatttctatcattcaatgagcatctgtatttcatagaaattgggggtatatagtcttaccgtaaggccag  
cctatccaacttccaggcattagatagctttaaagcgtggtgattatcataagagattccaccatatacaaaagattcgcgttctgaaatcggaaacttcccaatc  
cagaagacagatgggattctagattatcctttggcacaagactttatgcatactctctgggtatctataaccatactgattctcgtaaatgatacacgtagctaa  
agatccaccgggtcaacgtcataagcacaattgggaacgtaaaatattgtaaccatatacatataaaatgacagcaatggaatccaatcctctgctttatttga  
atattcgcagctcgaatcgaattggaatattgccctgctcttttctggcacaagagctcctcaattcactaattgtaggaagatactggacttttggattg  
aaaaagttcagaagatattcctaaagtagatggtgattgatagagcaattctgtcctataagttccagtagtagctcgcgcaacataaaagcttgggtgtagta  
aaacatcatttttctttgagatagattcgtaccccaactatttctcgcgatacttcttacgaagttttgtagggcatctataacagcctcgttttaggtggcaacc

ggcaagtagacgtccacaggaattaacttatcaactccccgaacgactataggaatccgactgaacattccaccagfaatagfacaagctccatagcaatgac  
gtaatttgggtcaggcattgctcatataatctactaagaggaggccattttcattgactgfaccggctgttaaaataggtccgctgctagactgatctggta  
ccaatccataacgatcaaaagtcgaatcgtgagcctattaatgaagcaaatcaatgaacaacaactggfaccatatagaagggccataaactagagactgac  
caatcgaagaatcttttagtgatgaaataacggaattggaactgtttggtcaagtaggggaaactcaatcaactcataactgcttfaatggaatctttctctttt  
ttttttgctgtaattfagcttaagaccattcaaggtccttttccatgcataactaaaccaactagataagcagaaaatgaaagcttcgataaaaacgg  
atataccaatagctgaaactcattgcccaagggtagagaaagaccgtttccacatcaaaaacaacaaaactagcgcacaatgtaatagcgtattcggaaftgt  
aaccaagccccccatgggtctataccgattcataactagaaagcttctctggtccttcacgaaccggagctaaaagtgtgaaatccaaaatgtaaaaatgg  
aataaggctgtctattattagaatgccccaaaaatcatatctgtgaagcagaacataaatgtactccatfaatgtggaatagcggaaactgaattagcaattca  
agtcagcattgcaattatagaatttctctcttttccctgggtaaacaggatcgggttttctcaaaccaagggtctagtttagccittgttctctttgccacgtctt  
ttaaagattcatcaatggaatcccgaactcctttcttttatttcttctatttagtgatggtggagacataattctatagaacaaaactctctgcttactttgctca  
tttctctagaatctctagaaaaaggaataaaaacgaaaatactacgaattagagcctaattaagataggatgactaatgtatgcagcctaagaggagtaattctata  
aaataaagaactctatttcagaacgtagatcgatttagattaggaatctatagatagataagcaaaagtaatactcaacaaaagtaggaattcgaagatggag  
aacatctgcagttgattgafagaattatcttttcttctgctctataaatttcgatgaatgagcctctgtaatccttttatctatfittatggcgcaggcgcctgtcca  
gtctataaacaagtactaataagggaaatgaaaactataactaaaggaacgtagatctctcctaaatctaaaaaggacaggacataatagggtataccgattc  
gaaccgtagacctctcgttaaaacagatcaaacggattatctgaaatgattcgaactgtttcaagaccacatgcaatttttgcattggccttttcaactga  
tagaaaagtcagttagtcaccatagttttctttacggaagataatgagatgctcctgcgctctgattgattttgtattatgatctatcaaggaacatacaaaagt  
gtttcaaggagattaccctgacttaggtctgctccggcctaaatfaactaacctaaagtgaatagagctctatcgttccgctacaagagttgactatgagactc  
atcaccttaaaagttcatagAACgaaaagaatttttggagggccttattcctattaagcctagcatttagggctggaatttcaactatcaactagcaaatcaataaa  
ggttctattgttttaggcactgattggtaccggactgaaccactatttgcaggcgaactgttctcctattctctcgaatccatgaagtaagacattgatttgc  
aagaagatccactatgtcattgcataaataagctcctttgaaaagcattggcgcacgtgtaaacgagttgctctaccgaactgagctatagccctgtcagagatctt  
aatatatagagaattctgtcaagatgaatattcttaatagtagaggatcttctgtctgttactataaataacataccaataaacgaagcggatttgcataaaaaag  
gattcgtctataatcgtcgaagtaaaagggtcttctttgtggtgataaattgcctacttaactcagtttagagattgctttcaccggcggagcattggttcaaa  
tccaatagtaggtaggttaggtagaaaaatactagatagcattggccctactcgttcgctatcaataatttttaccctcttccctttttgtatcaactaaaccg  
ttgggttcttcaatagatgggggaatccaatcaacagcctcgaactcgtactcagctcgtctgagagctactcgttcaaccaatttcttctaccctcagctctac  
tcacgttagctcggctattcaagtgcctgttgagcttctccggatcaatgtcactaccaggtccgcatcttctaaaaatgatgatctcattatcaactattctgcaa  
aacgctccacagaaccgccgtaaccattgacgttgaggaggcgtattctcaaggaccatactacagctgttfaatggggcgtggtttgtaatacggca  
atftggcactattagatagataaaatgatttcttactcacaatccaaataatcgtttagagtcagatataaaagattatattcttcaattgttctctctctta  
agtttatagcttctgctagctcatgatgttaccaccaataaaaaagcctgttcggtagccgtcaattctccgaaaagattagtgaaatccctaataatgftt  
ctgcaagcaacatacttcccggagaaccgtaaaaactctgccacaaaaaacgggtgtgataaagcgtcaattttctgctctgtctacgtaaacgatc  
ctcctccgataatcatccaaccaagaattgcgataatgtcctgaaagtcttgtaacgttgaagtttgcctaaactcttgcgagttcataatgttgcgaacgat  
ccgaggttgaacatagttgaggtgaatctaaaggatctactcaggataaattcctttggaagctaatcctctgaaaagtaggtagcatcaaatgtgcaaat  
gtttagcaggagcagggtcgtcaaatgtccgcaggtacataaacgcttggatcgaagttagatcccttttagtagaagtaattcttcttcaaaagaacca  
ttctgtactaagagtaggtgataaccactcagagggcatttccctaataaggcagatacctccgatcctgcttgaacaaaacgaaagattatcgtagaatag  
aagcacgtctgcttataacatctcggaaatatttgcctagtttagggcagcaaaccaactcctacagctcctggcgggtcattctttggcctatagactagag  
ctacctttgattcctcaagatttttcttaattactcagattccttcaattcctataaaagatcatttctcagagctccgttccctactccgcaaatagcggatacgc  
ccggtgagctttagcaatattgttgaatfctcatgatgactgtttactactccagctcccccaaatagctccgattttctccacgcgataaggagctaaaaag  
atcgaccacctaataaccagttcaaaagatggataattcgtatcaactcagataaaggcggcgcgctgatctagaatgggaattgtcactagatctacaggacc  
aaatgtcaacagctccccaaagcgttgaatcgtcgaagtagctccaccgacaggaaactgagagagctcccgtcaatcacttccatctctcat  
caaccatctgtagcactcatagctcactcgaatttctcaataatgttgaactcacaagttacataaattgttaccctcagtgctcgaactctgactac  
caagcattataaataaagtaactgtcccggggaaaagtgacatccagcaggggtccaataattgatcgtacgcctgtacttttctcaattgtagaaacc  
cgggacgagaaagtagtaggttctcataattatcacaataatttcaaaaaaaaggaaattatcgaattttgatttttctgtgaaataatccaaatcaaccaa  
aaaaatccaaaaatccaaaagtcaaaaggaaatgaattgtaatacaataaagagaaaaggaccagcactgatttgcgttcccaaacgaatccccatcaat  
cgttactcatggaaatgagctccgtcggaaagttcaatcaatctttttctatatacatittgccttttgaacgatttgcctactctactttctatctaggtcgaatac  
aaaaatatactactgtgaagcatagattgctgtcaacagagaattttctagtagtttgaatttctcactcaaaaataagaaaagggtctattaagaacttaataagga  
ttagaaggtgattgggtgctctatctatataaagatatacaataaagatggatttggtaataaattccatggttataaacgaagcatgtaactaccataacaa  
caactcaattcttatgaattctatagtagaattctatagcatagaattacacaggggttaccattatataatgaatgaaacatattatgaatgaaacatattcatta  
actaaagcatgccccctatttcttaatgagttgataatgaatcttttttaagattttgcaaaaggtttcttaccgctaatccatcagtagaccctgtcgtt  
tgagaattcttaattcatgagttgtagggaggacgtatgtaccacaacagaactaaagcaaggttggattaaagctggttgaaggattataaattgactfact  
acccccggagtagcaaacaggaactgatacttggcagctaccgagtaactcctcagccgggggttccgccgaaagcaggggctcagtagctgc  
cgaatctctactggtacatggacaactgtttgactgtaggactaccagctgtgatgtacaagggcgtatcctacatcagagccgttgggggagataat  
caatatacgtcttagcttatccattagacctattgaaagggttctgttactaacatgttacttccattgtggtaacgtattgtttcaagccctacgcgctta  
cgtctggagatctgcgaattccccctacttattcaaaaacttccaaggtccgctcatgtatccaagtgaaaggataagtgaaacaaataggtcgtcttatt  
gggatgactattaacaaaattgggattatctgcaaaaattatgtagagcatgtatgaggtctacgcgggtgactgattttaccaagatgatgaaacgtaa  
actcaaacatttatgcttggaggaccgttttcttttggccgaagctattataaatcacaggccgaaccgggtaaaataggggacttctgaatgcgact  
gcaggtacatgcgaagaatgattaaaagagctgtatttgcgagggaattgggtcctattgtaatgcatgactactaacgggggattaccgcaaatactagt  
ttgctcattattgccgcgacaacggcctacttctcactaccaggacatgcatgcagttattgatagacagaaaaatcatgtagcatttccgtgattagctaaa

gcattgctgtctgggggagatcatatccacgctggfacaagtagtaggtaaggtagaagggaacgcgaaatgacttttaggtttgtgatttattgctgcatgatt  
tattgaaaaagatcgtgctcgcggatcttttccactcaggactgggatccatgccaggtgtataccggcttcagggggtattcatgtttgcatatgccagctc  
gaccgaaatcttggagatgattctgtattgcaatttggggaggaacttttagacatcctgggtaatgcgcctggtgcagcagtaatcgggtgctttagaagc  
ctgtgtacaagctcgtaacgaaggcgcgatctgctcgtgaaagtaataaattatccgatcagcttgcgaatggagctcgaactagccgcagcttggaaatag  
gaaagc gatcaaatc gagtfc gagcc ggtagataaactagatagctagactaagtgataaaatagatagaaaaaggtcctaataaaaaagaagagaataga  
aagatcaaaaatcagttacgaaaatcagtaattctcttttcttaattgattgcaattaaactcggctcaatcttttcagattgagccgagtttaaatagatttgata  
cgatcatgagacttgacaaaatcgggattcctctattctatataatttagaagataaaagggtataatacaataaataaatacaaatatagattatcatatgataatggaatca  
aatcgcagattttacagaaaaagtttctatttgggaaagaatcaatgacatacaatgattacagacgtatgatcattacccttfaaccgggttattctattccacttc  
tagatagagaaaaaacataaggagaatgaatgaaaaagacagagittggaaggttagaccctttctaagactctcttcaaaaaagaggacattttgaaactttta  
caggcacaatcgtgagcaacaagtgcgaaatgctcgaagaaaagagaattgatttcaaaatggtagaactagatgacgaagttttctataacctgatgaag  
aggtagtttttagttacactccgatcaagagcgagaagtttcttcaattcagattgactgctatagaatctggaccatcgtagagacgttcaaaaggctcctgatgat  
aagaatcactttcgcggaactccatggggtatgggcttcaacgcggtagacgtttgttccgaattttctggagcaaacctccgaccaacgatacaatgaattt  
ttctattcaaaagaaaaagattcggaaatgcaatgctactatacgcaccggaggaatctcggaaatattcttataatccatttttgcgcggggtctactaac  
aggactcgtcgcagagacgaggttcgtaaaaagctaacccggatcttccatccctttgggggtgtatagcctcaaaagctaaaggggtagatg  
agatctgtagtggtaaaaaatttgccttgattgtagtacttttccctcttaccgcgattattgtatgctctagaagacacgtatgcagagaggaatt  
acagtttaaaaaagcctaaaaagtttcaactttacggcaatcaatcaactaaagctctatgatcaatccttacagcggatttgggggtccgagatgggtg  
aataagattgcatgtggaaggagtagacgaaaaagatttggattcgaataggcgcattcgaactaagtcgactttgatccaattcaagttcgattagaaggt  
agaaagccgcgaggtcggaaaagaaaaatcaaatcttttaattgcttctcttttctatttttataataatccattcgaattcttttttagaatactaaag  
attctaaaaaaaagattctataaaaaatctttttgcaaacataaaaaatcaatgcaataatcttataatagatatacttaattatatacaagaacttaagattttt  
gaatagatacaatcgaatagatagaataatgaaatttgaatggagacactattctatgatggatttfaactaccctctatttctgctttagtaggcttagatttccg  
gcaattgcaatgcttctttttcttattgtgcagaaaaataagattgctagaaccgacgggaccgaattttctcaatgtatttccacacaggatcataatcggatctt  
ttagtgtgaagtaataataggtatgttattgtgctctttctacacaaaatgcaaacccgctatggatgggattatggatgcggtataggtcagacataaatg  
catgcatatgcggaaccgggtatagcaggttttttaagtgatcaacaatacttttgaatagaaagcaatgtatcaaccaattttttacaggagtagtctagttgc  
gaaggcgttccagaatcaaaaaagtaaaatcaaaatcttttcttctcaatttcaatcgaaccgctgttagtatataatgaattggcgatcagaacacat  
atggatagaacttcaaaaggttctcgaaaaaagagtaatttttctggcctgtattcttttctaggtcactaggattcttagcgggtgggctccagttatctggtaa  
gaatattatctgtacttccatcacaatcttttttccacagggggtcgtgatgcttctacggaatcgcaggcctattcattagcgttacttgggtgactatt  
ttgtggaatgtaggcagtggtatgaccgattcgaataaaagggagtagtgcattttctggtgggattccctggaataaaacgtcgcgtcttctctgattcctt  
atcggggatccaatcaatagaattcaggttaaagaggtcttttctcgtcgtatctttatagaaatccggggccagggggccattccctgactcgtactgat  
gagaagttttactccacgagaatgaaacaaaagctcggcaattggcttatttctgcgataccaatggaagtattttagtaccattgaatttttgaatgaattg  
aatgaagaagattggaagaagaaaagtttctcaacacgagggaaaaggtccctcgaattgcatatttgaagggtattttagatattatcaaaagaaaggaac  
aatgagataagagaaaatgcttcaatttccaaatgggataatgctgcaatattctccattttcatccgaaaggactttttctattcttattccactccatg  
atcaagaaagaaactcaatgcaatgaaattctactagatagaaaaagaggaaatagatacaaggctcacaacctgttatagaattttcttcaaaagaaaaagaaata  
tcatatagatcagcgaataaaggcgttcaatacaactcaattacagatcaaaaatgaaaaaaaagaaagcattgcttcttctatcttatttattctgactttt  
gccttggggagctcttcttctttaaacaatgtctggaactttgattaagaattggtggaataccaggcaatcccaactccttaactgatttcaagagaaaagagt  
tctagaaagattcatggaattagaagacctttttatcttggacgaaatgataaaagagaaaccgaatacacatgtacaaaacccccctataggaatcgaaggaat  
aatacaattggccaaaatagataatgagggtcactccatatttgcattctcgaacaataatctgtttgctattcgaagtgttctttttctgggtaaagagga  
actgtattttgaattcttgggtcaggaattcttataacttaaatgactcagtaaaagcttttttattcttttagttactgattttttgttgatttactccaccgcggtg  
ggaactactaattcgttgggtctataacgatcttggatgggtcttaacgagcgaattttctactattttgtttagattttctgattctagatcatgttgaattttgggt  
cttttttgtttaaaccgctatctcttctgctttagtctatttattcaatgtagaagcataaactattgatctcctgatattaatcaaaatagatccttttctttaga  
aagaaagcctttttcattttagcaaaaatctttttctatttctactcgaaggtattcattcaccagtaaacctgttcagtagaatgacaacagattcgtgtataggg  
aactagattagcttagctacctatcaattattgtagaatccgggatctgtgattggacatggaaaatagaaatacttttctggtaaaaggaacagatgactcgtc  
gatttctgtatc gatcatgatac gtaataactggacatctatttcaaatgcaatcccaatccttttgcgcagcaagggttatgaaacccacgagaagcaactggacgaa  
ttgtatgtccaattgccatttagcaataagcctgtgataatgaggtccccagcagtgcttcccgaactgatttgaagcagttcttcaattccttatgatagca  
actgaaacaagttcttgaatgggaaaaagggagggtgaaatggtgctgcttatttggccgagggttcgaattagcgcgccgaccgatttctctgag  
ttgaaagaaaagatagaaatctcttcttccagattatcgtccaataaaaaaataattctgtgatagccctgttcccgtaaagaaatagatgaaatcgtcttccc  
attcttccccgacctgcatgaaagaaagcgttacttcttaaaatattccatataatggtgggggaaaccgaggaaaggacagatctatctgatgtagcaag  
agtaacaatcaggtctataatgcaacgtcaacaggtgtagtaagaaaaactcgtgtaagaaaaaggggggatagaaatcctatagtcgatcgcagatggac  
gccaagtattgatcttatactcccgtccagaactcttcttctcagagggggaatcgaatcagcttgcacaaatcaacagtaatcctaatgtgggaggggttgg  
caggggatgcagaaatagcttccagatccattacgcttcaaggcctttgttcttctcgcacccgtattttgacacaagtttttgggtctcaaaaagaaacggt  
tgaaggggtcaattgtacgaaatgaattctaggtcccggatttctaccatcaagttggtaaaaagccgcgatttattgctgattgctagaattctctatgatcattt  
ggaaatcttttttttagactatttttggcagatgcttctgctgcaattccttattctatctcatgcaaaacgaggagaatgcaaggcaaggcgcgagaaca  
ataaaaagaaacaaatcttttaggagggattgctgcttcttaactctctattgggcacaagaaaaagcctttttgcttcttctgtctgattcttcttctgataat  
gaatctttttctctattcggcaagattactatttcttatttgggtctgctcttgaaccttttctttaggttcagcgcgatgtagtgacaaaaagagggaaagaa  
aatatgctgggggcaaaatttttagcacaatagaattgctgacttgtcaatfaagttcaatttagaacctacagaaatttgcaaaaaaatggaactcttccattg  
aaggctgttttttttaggctagttgagtagtttaattaaggttttatttagttattacttaaaataatcaatgatttacaagagacttcccccggtaataaaatattgg  
atcctcgattgatcttcttctcctcctcctcataaaagtaaatatttcttggcaggggggtataaatcaactgatggatttacttcaactattatacaacaacaaa

ttaacaaacaaaacgaataatagaggattctgaccatcagatcaaaaggcttctcttctgttatttttacaaatcaaaataggaacccggttgagggtatggaataga  
ttaaaaaagtcgggtataagagtaagaatfccggggctcttccgctctaatcagataaaaaggggtaaggaccgctaaagtcctattttctgtttacaacctg  
gtccctcaactactatagatgaaccaatccagaatgaaccgtaaaagaaaacactattaaccaatcacagcaataccgggttacagtacatcagccaa  
agaggaaatctccagtagtatggccatttcccactttctccacattttatcaagtggtcatgtagacaaaaacagtcattgagatgataaggtatgatcctt  
ccaaatggggataagagaatcttactactctcttctctcaattgaaagaatggaataaaaaacagcaagtaaaaaatgagtaaaacccagtataga  
ctgtgacgattcaatcaacatttcttctctggtttgattgtgcatagttctatagttggaatttgggttatcgttgatgactgactgctgattgatcccaagaa  
aaaacagtaggtacagctagctcgggacagccagccatgcactgtaaaaaataggatagggtcgtatgactgactgaggccctcaaaaggatcactaaat  
catcagagttgctaaagaatcaaacgggtcgttattaacggaatcccttctgctgcttctgtaaaactggttggccgaggactccaacacgtcataagctaaa  
cccgactgacaataaccaaccgcaatgaatagggaaggatagtaatgctatgaataaccagatcgaactggaataatcagcaaaagaacgttctcc  
cgtgctccagacatgctgagctccccaaattttgtacattcaaaaaaggaatgattccgtaaagatgggatcaaccagtaaatagaaaattactgatattcatcct  
tgtgagattgcaattttgaccaagggtgattttgagtatcaaaatgtagtactccctctatggcacagcaatcctgttccgcttgcgtcgaacagaaatcttt  
ttctctctttgtccttctgtctatagggttaagctataggtatcaaggcatcaatagaaaacctcaatftggggcctacttaatttaccggcttggaaatgtagaat  
aatcggaaatagggtcaagatctgggaaaatcaagtaatgatcaacaggtttgataaaagaaatggaagataatcttatactgacacaatacaaaagagaag  
agatgcaaaatcctccgaatccaaccttcccctaaagaatftaattggttagcataataatatacttaataatagaaaatcaaatagtagataatctgtatga  
aagagaaaaactcttgaagaatcaagatcgaatcaaccttgcctgttactaacttttaccactgcaaacactgcaagcgtggaactttccaggtttaggttccg  
aaatgtagtaaggaaaaagaggttcgaatcgaacttgccttgaatcaaccttgcctgttactaacttttaccactgcaaacactgcaaacactgcaaacact  
cgaggggtcgtggaatgcttctctcttattccatagaaatacaatcaatftaattttctctctggttaccacttctgtaactcactctctgttttttagtaattatcaaaataac  
ttacacagcaaaactctgtgacgaatagggaactcgtcccactgtagaaactcttctttacactctgtatcactcactctgttttttagtaattatcaaaataac  
cgatgaattatgattttccataacttaggttaaggctttaccacatagtagtgtagtaaaaaaatggaatftaaccttctgcttactataactagttatctgggtt  
ctattggctgttaactcaaccctagctctattttggctgaacaagatagctcttattgaaatgaattgaatgaataaggcagaaaaaataatctcttttggga  
ttctgttattctacgactaattcaacttctttttctgtgctgactgagactcgtggataatgtagctactatttagggataaacgtaactcttttttaccctcgaaca  
aatcgaatgattgaagttttctattttggaatcgtcttagcctaactctattacttttagcgggattatcgtgactgcgatttgcaatacagacgtgggatcagttgg  
atctttgattgagtaattttttgattgcccctctctgctcgtggagagggtcaatggaatgcaatgtttttaaagttattttgcttctgacataagatag  
atggaatcagctctgtagatttgaactcagacatcgggttggagaccgcgttctaccgaactgaactaagagcgttcaaaaaataatcttttactcct  
aatgtgtcagctagatagatccacaataaagtataaccgtttaatcgaactcctactactgctataaagaagaagaataggtagggtgacag  
gatttgaacctgtgacattttgaccaaaacaacgcgctaccaagctgcgctacatcccttttcaaaatggtgacaatgctatgacacaatcctatctgtttcc  
acatcctaattttctgtcttttctatcagaaatcctcgtgctattcttcttttggctcactataatcaaggatggtatatactaaatcaatcaattcactataaaa  
agaaagattactatccttggtaatctataggaggattgcttttctgtttatgctcgaatftccgtaaacaaaaagaatacaaatgacttggcaataatctga  
tcataatcgtattcaataaggaggagatttcaatcgggatataaaaacataatctctgtagcaccgtgctaagtactctatggttgggcttttagcaggtta  
ttgatagaataatcgtttatccagatgcttctcattcccctttttcttctagttgtgctatgtaggaatagattctcgtgacatgataaaaaatcccaccttt  
tagtataggaaagaaaagaagaagaagatagggttggaccttagagctatgaaatfttggtaaatctcattttgaaaaaaagaattcaaaaaagcagtat  
ccaagctaagtcaggcccaagaatcagagcagatagaagaggctgggttggctactaaaatgaaggattttgcttcaaaccttctgtaatttgaacaggttatt  
ccttaattttctctatttttttacttaattgaaaaatcccataatftttttcttaattggattttctctctctcgtttcaaaatagaggaataaaagaataagtagaag  
aattaagftaaagcaatccaaaaaggaaagggttcatggccaaggggaaagatgtagaatacagattatttgaatgtgtgattgtgctgaaaaggggcca  
atgaggagtcggcagggttttagatagtagtaccacaaagaatcggcaatcaccggacaattgaatgaataaagaatfttgcgttattgtcgtaaagcagacgat  
tcatgccgaaataaagaataaggagatctgtgctgatcttcaaaatcgaataaagaatccttctatataatcttattataatagacatagataga  
tacaatacaaatcaatttctgatttccatgataatattcctatgtagcagggtattcatatataatggacaaagagagactcctctctggatccaaata  
ataaaaaacaatcaattttttcaattttaaataaggaataaatatgatacatctaaacaaccttctataatcaaaacaacttctataatcaagcaaaact  
ttcgtaaatccaagcaactttcgtaaatcacaaccttttgcgaacccaacaaccttttctgtaggcgtcctcggattggcccggggatcgaattgattataga  
aacatgagtttaataatcatttattagtagaacaaggaaaaatattcagacgaataaataatgaaacacttgaacaacaacgattactcttctataaaacag  
gctcgtattttatcttcttaccattcgaactatgagaatgagaacaatftcaagcccagtcacttcaataattacaggtcctagaccagaaaaaataagacataatc  
ctccattaacacaaaagttcaattccaatgaaacttaagaaactcaaccagactttaagaacaacaatcggaaactaaagtccgattgttgaattttattcgaagg  
gccagactatataaagaagaatccaatttagattctgggttgttataagaagaacaatggggaagaaaaatagttttttattttagcaacatgctcgtgatt  
cctaccacttaattcttaatttattctcctgggttaccctcctgggaatcttttaatttctctgtagatttatttttacccttattgataatctttattttgaaa  
tcgtgtaagattatttggatttaatacagctacttctgcaaggattttacgattaagaatcaatcttcttgaagattgtgatttattactataatcgaatacttatg  
tatccgcttgcgttattcagactgatccacaacgccgaaaatcccttcttctgactctatctcagtagagagaaacaacgctcttcttactctgtgagta  
cattcattaaagcttaaatgaccctctaaagttgaggcaaatgaaccattttgcccgtcgtcctcagctatatactcgcggaactctgtcattgaaatcaaa  
ttaaccttaagtaactaatgatttctcttttagccatcttttccatataaacaacgaattattccatataaaaaatattagttcaatgcttttctactataa  
ccttccaaccacaatfttctcttactcctcagttatttgcgatagaataaaaaatcgaactataaaaaatagttgggtccatctgttctatgttccctttaaa  
cggcagggccctcttataaccggagccttcttctatcacaagggatgtgaactgtatagttcacttcttggctctacatcattatagatgaaatagc  
tctttcacaataagagttatccatagtagggcatttaattatgaaagttgcttaagtagctgacctttagctctgttctttttagataaaggagcataagcctttatct  
tttattactattctcctaatgaaatagcgttctaccactgggggaatgtcttcttatttcaatctagatgattggattgcaaaaaggaaaccagaatctcat  
ataccgtagaaatcagtagagaagctctatcttattcgtaccgatcaggaacttcaaaatgtctatttgggaaaccatgatccgaacgagctgcaca  
tacacctgacatgctcctgacgctgaggacatcccctaagcggccgattttctagcattctgatttggctgcttgcgttctaataagttgtaaccgttggca  
tctgtatgatatagaaaaaatggattgttagatcgtctaacctgaatgattgatcattatgaattttcattaaatgcaaaaaccgaaatttaggttgaat



aaattacaagaatctggccactaccaatccttaaacatttctgaaaccacactggatcagatcgcagtgctcgtcaagcatttcatcccctacaatcgcagaagt  
ccataagcttggcttcgtcgtcgcataaaaaacatcccttccatgcttccgatacaacccaaaaaggcttgcctgttcttagtcataaaccttggatcatttccg  
gaacttggtaactctccacttctagtaaaaattctggttcttcccgataaataagcactagcaggttggtaagcataatcctcgcgtgggggaatgctacagct  
tgggtggttctcctcaagcagaatgaaggacgcatggacgcgcttccgaggcattgtatataatctggttcaccgttgcacgtatcaaaaatgcat  
tctgagattaaccaccgccgggggagttataaacaataatcgcataatccatcttactgagatataccatgagacctgtaatatgattcgtgacctgc  
aacgaatccttgacctaaaaaaggcttctcgcatacaatgtataagcaacccagctccttccatcctcgggaatccggaatgacttttgaacac  
caatggcatattagtaataattattaaatttaagtaagaaaactacacttataatggaacgtaagaatggaagagaagaagaatccgcagttattgtttcactt  
ttttcttattctatgaactatagattctattaatcgtagattgaataatcagattgaaagattatacatataagtaggataagacagattgaataaagaaaaa  
gaatgggtgattcgaactaacaacaaagagataggatcttcttcttcttccaaataagccaagctgccattgcatattggcacttaccgagtatagaatagat  
ctgcttcttcttcttacgaacagaatggcttcttatttaaggaatgaataaatttccacgttctgacacagaatcccctagaagggttaggacataggatag  
gatagcttggcaatcgataaaataaaggacatcgtgcttatttcttctgctaaagggttccatgggttgccttggatcgtgttcactctgctgattgaatgat  
ccggctcgttgccttgggtcgcataatgcacacagctctagtttctggttggctggctcgcagcttcttaccgaattagcgggtttgatccctgatcctgttctgg  
atccaatgtggagacaaggatgttcgctccttctcactcgtttaggaataaccaatcgtgggtggttggatattcaggaggaactgtaacgaatccgggt  
atftggagttatgaaggcgtggcagggggcgcataattgttcttgccttctgcttctggcagctatctggcattgggtatattgggacctgaaatattctgtagc  
ggacgggaaaaccttcttggattggccaagatcttgaattcatttcttgcaggggtggctgcttggcttggcgcattcgtatcaacgggtttagtgcctc  
gggatattgggtgctgacctttaggactaacggaaaagtacaagctgaatccggcgtgggtgagaaaggtttgatccttggcttccgggggaatagcttct  
atcattatgctcgggtacattggcattatagcggcctattcctttagtgcctcaccctcaacgtctatacaaggattcgtatggcaatattgaactgta  
cttccagtagtaccgtcgtgttttttgcagcttctgtagttccggaaactatggttatgggtcagcaactaccctaattgaattgttggcctactcgtatcagtg  
ggatcagggatacttcagcaagaataatcgaagagttagttggtttagccgaaatctcagttatcagaagcttggctaaaattccgaaaatttagccttt  
atgattatftgtaataatccggcaaaaggggatttaccagagcagctcaatggacaatggggtggaatagctgttggatggtgacatcctatcttttagg  
ataaagaaggcgcgaacttttgcacgctatgcttcttcttgaacatttccggttggtagatgaagagggaattgtgagagcggacgttctttagaa  
gagcagaatccaaatagttgaacaagtagcgaacgggtgagttctatggtgcgaactaatggagtagtattctgatcctgactgtaaaaaataatgc  
gaggcgttcccaatagggaattttgaattagatcggctcatttgaatcagatgggttctcgcagcagccaagggttgggtcactttgtcgtatcctt  
gcttcttcttcttctggacacattggcatgggctagaacctgttccgagatgttttgcgtgattatccagacttggatgctcaagtgaatttgaacattca  
aaaagtcggagatccaactacgaggagacagccagctcgaagccgacttcttggatcttccactctcttcttggattgacatgggaaacatcctccatccttct  
tgacttcttcttcttcttatacgggaaatgatcccaatgacaatgaataggtgtggaagtataattgaaataaacacgatcgaatctatggaagcattggttatac  
gttcttcttcttcttcttcttcttcttcttcttcttcttcttcttcttcttcttcttcttcttcttcttcttcttcttcttcttcttcttcttcttcttctt  
tctgggagactcttactcaattagctcccgttcttcttcttcttcttcttcttcttcttcttcttcttcttcttcttcttcttcttcttcttcttcttctt  
gtaaacagatagtagatggcactaaagtctgttccattttatagaatttcaagattacatgatctacgaaaagatcgtgatttacaactacaacggaatag  
tatacaagtcacaacaatcattaaatggaattatgctacacaaccgttgaagatagttctagacctggaccaagacaacactcgcgtaggaatttattgaacc  
cttgaattcggaaatgggaaagtacccgggttggggactactccttcttcttcttcttcttcttcttcttcttcttcttcttcttcttcttcttcttctt  
cttccgttcttcttcttcttcttcttcttcttcttcttcttcttcttcttcttcttcttcttcttcttcttcttcttcttcttcttcttcttcttcttct  
cattctgtagtgcaccgtggaatttttgggttcttcttcttcttcttcttcttcttcttcttcttcttcttcttcttcttcttcttcttcttcttcttct  
tcaagatattcaatcgtcggatattatttctagatctggaacacgaaatagatagatggtgatcaagaaaaaaatgaaactatgattcatttaactattcag  
acctcgaaccagactgaaaaaattcaagtagtcttaataaaaaataaaaaagaaaatttcttcttcccaatttcttcttcttcttcttcttcttcttcttct  
cgagtcttaccgattcaataatgatcacaagcgggttcttcttcttcttcttcttcttcttcttcttcttcttcttcttcttcttcttcttcttcttctt  
tttaattgaactgattcagatcgaacaagataatttctaccgaaaactactcaatttcttcttcttcttcttcttcttcttcttcttcttcttcttcttctt  
aaaaaaagaatccaaatagggaagagaaaaatcaagagccctctaatgatcaacttgggaaagaaagatagacgagccaactgagatttttggcattatc  
atcacaagaagaatctgattttcttcttcttcttcttcttcttcttcttcttcttcttcttcttcttcttcttcttcttcttcttcttcttcttcttctt  
gtgttctgtttgagccgtacgagatgaaattctatatacggctcggaggggggtcgggttagttacctatcctaagatataattgattgttggaggaacgtctg  
agattcaggcaattgcagatgataaactagtaaatatgttctcctcctatgtaacatatttattgtttagggggaattacacttactgtttctagtaaaagtctaccg  
gttttcttacttcttcttcttcttcttcttcttcttcttcttcttcttcttcttcttcttcttcttcttcttcttcttcttcttcttcttcttcttctt  
tcagcaagtagtatttcttcttcttcttcttcttcttcttcttcttcttcttcttcttcttcttcttcttcttcttcttcttcttcttcttcttcttctt  
gtattaactgcatgttgggttaactgttattcttcttcttcttcttcttcttcttcttcttcttcttcttcttcttcttcttcttcttcttcttcttctt  
cacttttagtggagttattacgtggaagtctagttggttcaatccacttcttcttcttcttcttcttcttcttcttcttcttcttcttcttcttcttctt  
cacttctaatgatacgtaaaggtatttctggcccttataaggaaggatcctcagatagagattcttcttcttcttcttcttcttcttcttcttcttcttctt  
acaacatgggttattctaaataagacatgctattgatacttcttcttcttcttcttcttcttcttcttcttcttcttcttcttcttcttcttcttcttctt  
gaaggcggatttggagttgctgactgaattattgattggcctcagatagagagttggtctccacattagaattcagaccaaagggtgtctccatccaat  
caacacgtaagtccttcttcttcttcttcttcttcttcttcttcttcttcttcttcttcttcttcttcttcttcttcttcttcttcttcttcttcttctt  
atagatgaaatgaaataagcattgacatgatcaattcttatttacttcttcttcttcttcttcttcttcttcttcttcttcttcttcttcttcttcttctt  
tactatcggagtaaaagaaggatcgaaggaagcgtaggcctaacttttatttttattagtaacaagtaataacttgttggacgtaagaaactgcaatattgg  
ggggataaataccaactaatcaagagacgcgagacaatccacaagcaattgatcatgatcaatttgaagcccacttggatattgagcattaccataagag  
aggattcttcaatgaatattgtaggtgcaactcggaaaatagaatctgataaagcttcttcttcttcttcttcttcttcttcttcttcttcttcttctt  
acggtttttcttcttcttcttcttcttcttcttcttcttcttcttcttcttcttcttcttcttcttcttcttcttcttcttcttcttcttcttcttctt  
tacttaaacgatcctgtattaaagagcaaaatagctaaaaggatgggacataatttactgggggaaccgcgtgcccacgatcttcttcttcttcttcttctt  
tctaggtactattgcatgtaattgagtttagcgggttctcagccgtcaatgattggtgaaccggcgatccgttgcactccttctgaaatattaccgagtgactt

ctttcccgtgttcaaaftaccgtacagtagcctaataaagtattggggcttcttaatggttctgtccgacgggcttattgacagtagcttttctagagaatgcaataa  
atccaaaatccatttctgcccagtagctacaaccgttttfaateggtagctgagtagcttttggttaggtattggacacattaccattgaaaaatccctaacct  
taggtcttttttagggattttcagttgattcattcaatcgtgaagtaccgtgataggtatctaggaatagtactccaagtgaattccctagatacctataatctattt  
tattatgatccatttctcgaaaatataatgattgtcccaaatgcaaaaattgtttctttttcttttttcttaactgaaaaagaagaaggaaaaaattgcaatggaatt  
aaactagaacttattcttagttaaattcattggagatgtctcttagagtgtccatatctgtttccatcttgacacgaaaactgtcaattctcagatctctccct  
cttactcaaaaagtccaatagtgatgataatggcccttttgagacaattatagcttagaaggcagttcaattgatcaataaaaaatacaattcaatggaattcttttt  
gttttcttagattagtaattctttttgaaagcttaaaaggggggaagttaaacctgttttattttctggaaacgagtagccctctcctcctggtggaagaaaggaa  
ataaatcaatcaaaftaccgagaagcctcataaagcgttccttagggggttaaactccattgtgcatattctagaaaaagtatcattttgcatttccattcccaca  
gcaaaaaactataatcacatttcaaacaggcatggatagacatctataggataactccatctttagtggtttctgactccggtgatatccgcgactctctgat  
ccgtaactcaatcaggaaatccgtgggttctgcaagttagctataggttggccgtatcaacgatttctacggaaaggcggtaagataaatcttggcagttatgtatc  
taggacctttgacgcaaatgatgcggttctaactccatagagatttctcaatacaatttcttcaaafttagtaaaattctttagaccgatttccaatccctgattgta  
gaaattctgtgcccagctcccaattttgcatgtgtgatacatgttctctgttttccaagtaaagccttctgcaaggcaataccaacggatccgcttgaactttc  
taagcggggacagaatgaaacgaccataataaagacgcttactatctactcttgattcaacacacttccactgtatgtttgagtggaatcctgactcctcctcgaac  
catatagactagattatattgacattgaatcgttatttcttgaagggtttaaacttttacagacgtcttttttaggaggtcgacaccattatcgggcataggtg  
ttacatcgctatacaactaactgtacaccacttttagcaatggctgtaatgcccactcttccactaccagcaccctttaccataactctgtctggttgaaccca  
ctgtacgaatgacatctacagctgttctttagaccagcataggggtgatgctttctgagcttttgaatccacaagtaccggcggaggaccagaaaaccaccgaccttg  
cggatctgaacagttataatagattgttgaactagctgaaactgaataactctttgttattctacgtgactcttccgtaactaaaacgcgcatcctacgcaaa  
ccaatacgtacttctacgtgaaactttttggtatagcctttgtcattttttatctcaataatgatgtagaataaaagaaaaagatacaaaagatacc  
gtttcagggtaaaatafatccttacttgaattttttttggaatttggacatttctcgggttactttttttacttttttagaaagtcaagttcttttctgaaagattaccctgtc  
ttgttttagctcggattggaacaaatgacttaattctgcccacgctacgaatcagctgacattttgtacaattttacgaacagaagctcttatttctatatttccgattc  
ctttctaactatgaatttacttttggaaaaataagctctttggttgaatttttagaacctttgaaattttaccctagaaaaaaaagaaaaactaacctttgaaactttg  
gtatcctcaaatcttccgtatcctcagctctcgttccgacttccgaactctttaggggaaactataaattatagcccccttcttgaatcaaacgacttacttcaattttg  
accctatcccccatcagattctgtatagaactagaccggatcttctgaaatagaccaggatgatggtgctactcttagcgaacgcggaaactccggtgggta  
gggcttccataactaaacctcgaagtaaatttctctctcgggttttttttctctctatttttcttctgcatattttttctcctatttttcttttttcaataaaaa  
aacggtgtattttgttgaanaataaggaattcaagatagaattgggtagctactaatactaggtggggcgtaccgctatagggcggggcgtaccatataatacata  
agacttcccccaattctgttagctgagcttctcgtatctgtcattatactcagaaagtagaagaatgcaatccatccgccccaaaaccttaggaattcctgat  
agttggcataaattcgaagccaggtcggctgatacgtttaaagggtctagttctatataatcctttctagctttctctttttagctcgaagttgaaaccaagaaa  
tatctgttacttctgatgttccgaactttcaataaaacctctcgtagaagatttttaacaatgttttcgtaaatattgtagatactaccgaacagttcctttttattc  
atgtccgcgttcttatagagggttagtaaatcagcaatagtgcttcccataagactctaattctaggttccctcaattttctataatcaaacatgtctctttttcttctg  
ttggattctaaagcatatacgtgaacacaaactactaattttttttgatctataatctgtactagtattataatctcaggagctaatgaaacttttttagtaaaattc  
aattctcctaactcctcggcgatcgcccaaaaacgcgagttccttttgattcctttttgatcaatgataaccgctgcattgtcgtcatagcgtattattataccgtctc  
catttgaactcttaccatgtacgtacaattacagctgaattacttccgatcttctagaggcatttggggcactgcgtttagattacagcaacaataacatccaatac  
gagcatatcgtgattactagcagctcctatgactcgaatacacataaatttcgagctccactgttatctgctacattaaaaagggtctgaggttgaatcatatttttga  
ttcaattgttatttcaatgcaaaaggatgaaagaaatattgttctccagaaaagaacctgttttttatttcaactactttttgggggggttatatttcaaccgaa  
gaaattgactcgtatgggcattttctgagcagctatggaaatgctgcttagctacagtttgggactcggccatttcaaaagtattcgaactggtttaaacaacgg  
ctaccaatattcgggggatccctttcccgaaccatagctgtttcagctggcttattgtaccggtttgtcgggaaatatactgaccagattttccaccacgacgtg  
catatcgtgctattgctctctcgtctctatctgctcggcgtaatcaagtgggtcaagtgttgaagagcatatccaaaacaatacaattgctcggtagg  
attttccctcatttctctctatgtttttacgaaactgtgtcttttggggtatagctgatgttctctctttagttccatctcactgcaaaactggacatgagatttctc  
atccagctctcgcgaaatcaatgaaaggtgcaaaatttcttaattccacaataatttcaaaatattacggatagatacacaataatggaaggttaggggttttaata  
ttgaatttataaaactaaaatataatagtcagaaagaggatctagaatatactagatgtgtatttattctataattctataattttaaattcttttttttttgaact  
tcttttttttactcttattgaatcgcggtaaagtattcattcaataaaatttccggcggcaatattacttctcctgcttatttgaattcataacttcaacttaataa  
gacaattttttggtttgtccgccatcccaccaatgaagtattgggacttctcaagaaaaactatccagctataggttctgctgttccactgcttcttcttcaatggtt  
agggttgaatctcgaatggagcttccaaaaaatttctccgagtcatttctcagtttattaaactcgggacgctcttgttattccttgaaatttctttctgttcaatca  
aattacatttcaatttctgtttttttattatattgatgctttatcacttgccttttatgatgtaattcatagaccatacatattgaaactataatttcttatttctcctct  
ttctatcctctctttatctacatccctttggttgettcaacttagaactcatttttttaagaaaaaattgcagttgctacagctatatgatagattactcattat  
gatagatgtatttattcatatagtactgttcttagtttagatctcacaatcaggaatagggttgggttagttctatttctataattacatagtaggggttactctatttt  
tttaatecccttttgaacctaaaaaaaactaacgagtcacacactaagcatagcaattttataaaagatttctcaatttcaaaacttataagaaaggatgagaatt  
tcttctttttcagggaatttagggaaaataaggctcttctcttttttcttacttactgaaacagaatgggaagacaggggttgtattctctcgtctacgaatatccaaatf  
aactcctaactccatagatagttcgaattggatagcagaataatcaattttagcgcgaattgtttggagggggaagctaccctttttgatgattcggcacgcgcaat  
ttctttcccgcgagacggctgcaatttttacttctcttatactgttttttagttaaattcaatgcttttttcaattgcttctcggatgaaactctatttttaattggaa  
agctatataattcgaagaatgttaggtgtctataaggcttcttctactttctgatcccaatataagctctggtttacagaatfaactctttttgtagatcttcttaattct  
cgattgtcctttttcttaataaattggggaatcaaataggaattatgactgtggaattgtatcgatttcttttgaattctataatgttaattctcggaaacttgagcctgag  
ccattttttatattgtaattactcgaacttgagctcttcttatttctatctgaagcccttttctatttctttgtatatagtcttgatacaattccgatttttttattctcctg  
tagacctcagaataaattttgtgtgcgaacaaaaggaaatgtgtatttgggtgtaccaagctgaacaaagtggatttttttgcctatttttctatttctattt  
ttttaccgggaatcaaatcttagatggatctaaagattttctgattcttactatatttagacaattgttatatgacacatggttttttttagggagaactacgtctcggag  
cccaggtctgaattttatcataatagtagtactcctactgactcggcttagtgatgaaataattgctttgtcgaatccctataatgagtagcatttctcgtcggcaataa

accaactttaagatgggataagatgctcgataaggcatgaggtcaatatcataacgcttctcgtagtaacgccaacgaatctatccagaactcttctactttgaaa  
 acggacatgfgatgcttttggcttfgaaacccgttcaactaaagtagacgatcggttggacttttctgcgagttccttagcactcttcttcttatactag  
 gggataactffaccagttgaaactgctataaataaggttattccccgttacctattctttttttttttgaaacttctattctgaattcagtaacgacgagatttagt  
 cctttctgacttccataactgtaaagccgagttgtagaattcccccaatfctgacactaccataggattggtatgtaaaggtatattgcttctccattatgaa  
 tcgagattgatggccaaccattgcggtagaagtagatgccccggaccagttactattgttcttctcctctcatattgaccttttcttttggccaataaatgat  
 gagctacaaaaggattcgcttttctgctcacagctgattactcctttttccatftaaagagtgccatctgatgccaatctctgatcgaagtaggaggtcagaata  
 aatagaataatgatgaatggaaaaagagaaaatccttagctggataaggggcgatgtagccaagtgatcaaggcagtgattgtgaatccacatgctcgcg  
 gttcaattccgctgctgccatcccattattgcaattccaaaatgcaatttccatattcctagttacgatttacttacggcgacgaaataaaaactatcactatatt  
 tttcctttctgacttctccaaagcgaggataaccccagggtggtggttttttctaccaatgggggcttcccttccaccgccccatgggggtgtccacag  
 ggttataactacccttactacggggctttactgccaacacttagaccggctctaccacaactttttggttaccccaacattaccactgttccgactgtt  
 ctaagcagtttgggataccaacggacctccccagatgtaacttfaaagtgccgatttacccttttgaactcagtttcttacagcacctgctgcttagctaatt  
 gccacccttccagctgtgatttctatgtatgtatggcgtgcttaaggccatctcctcaaaaaaccccttccaaaactgtacaag  
 ctcttccaaagcatacgcttcttagatgatatgacgatctctagacagatggacttatataaagtgatgaaatgaccacatgagtgatataaggaaaggaa  
 tccaaaactgccgaatgctcatgttatgatctctacactcaggtctccgcttccgctatctgcttctatgtagcattcagatgaatgactctatgaaatta  
 cgtcgatacttataatattggtaactgtaggagacatccctatttcccccgggttcttaattaccactgttacttcaattcgctctgacctcaaatgattatga  
 gaataaccgctcctctcttfgaaacaggggcgttccggctgtgctgcttaacaatttcttctcctccattaccatctctagatcaataatttctatga  
 ggaactactgaactcaactctgctgccttactcaacagtttctggtgagtctatcccgtagaggtatgtaaaattggtatcagattgctagtttctgtgtaa  
 acctaaatggttactccaatfctgtaaatcaatgctcaacccagctcaaggtagggcatttccattgataaggaaacttctaccagaaaacatagattctccaa  
 ttatagcccctcgggatgtaaaatataccttctcaccatcccatagtatgagacaattgtacgcttctgattagggtctattctatggttacgatttaccaga  
 tatgcttttctgattcgtcgaaaatcgattttacggtatagcgcttatgacctcccctctgcttgcggtaatgattcctctggaattacgaccttaccacaagct  
 gccgtccatggatcaaatatttctggtgattgattcactgctctatctggttccctgctgtgctgggtagatgttctgtataaatgttccggctattataagtat  
 tctcctttagtttctctatctagaagtggaatagaataaccgggtgagggaatgatcatagcttgaatgattgtagcttagaagggcccatttcttacc  
 ctctccgggtagtgatggctattcacagctactacctaaccacaagaagagttcgacccaatgttatttctgcttagtgaatcccattccacatataatgat  
 tgattcttcccaataaacgaagacttttctgfaaatactgctattgattccatccataaatcgaacttccctctatgctctgagttccagatcagataagaatcgagt  
 tcttattgttcttattgtatgtaataatacaccattctgttatgtatgagatgatgagattccatggatagagagccagttccaatgacttatggaacttcc  
 ggtctgctgcatccagcagggaattgaaccgcaaaattaccaattatgattggggcgttaccattcagccatggatgcttaaccaggatcatcgtacatcgtaa  
 ataaccaatftctatagaaagacatacatagaaaaatgaaatcgaatcgaatcggagatggcaaatatcggagatgactatgaaaacacctctctgctcctga  
 attgaaagagagattgagagggatccagaatcctaaattctcgctatttggaaatgagcgaatctctgatctgactatagtgatcttctttaagaagaatgac  
 ctggattcaaaaggattgaacaaccgggatccgttactatgatacctagttgacattgatacaaggatctaataatgaatttagtttaatagatcctcttagcagaaa  
 gacgtatattctgctcatctattcccaaacctcgtatggggctaattcgttctaccatctcagggaaaatcctttctctccgcttagcctatcgggtattt  
 gtgagattctataggaaactggacgatcctattgctcaaatcctaaatgaatcctatttcccttcaaaaggtagcggggcttcttaccacaagaaaaaacg  
 aaagcacttctcttcttctatactgggggttttacttggaaaagacaattgtccatacctaaaggattcgggtccataaccacgagtccagtgcacatagatctgta  
 gcacttagcaacgaggccctatgaatagacatataagaatfttggctgggaatcgaatgaatcattgagtgaaaaaggagcaaaatgacaaaaggagagact  
 ctactagcttctacttctggttctctgggttctgtttctttctggatctgctttctcattctgcaactcgcgatttctgcgagagaaccaaatccaagtt  
 ggtgaagatcattgattggctggaatagtagtgattaccttgaattgcggttctgaaatctaccgacttctcttttctgctcaaaagcgaataaaaccccttctcga  
 gccctttagataagcttctctggatcgggaatttctcttctcacggatgggctggttctgctgacttctctgctcacttctgctgctcacaagggatcaaaa  
 cagggattcgaacaaaaagggaattcgtagctactttctgctgcgtaaaaaaaaggctttacgcgagagcaatagagttgggatacctctctctctga  
 gaacctcttctgattctaaaggacccttgcagtagatgactctgcttgggttcttattattctcctcagggatttttaggagcttccaggtcactatttagt  
 ctatttggcttactgctcctttctcagggaaaggttaaggacctcagaagatagaggagagcggcaggcgaatttccggaatactctacggggatgctc  
 attgaaagcgcattcctgattatgcttgaagaggactcgaacctcccagctcttagacagagatfcttctgctgcgtgcttaccatttaccatcaaggcatctt  
 aaagtgaatcattccatgaatagatctatctaatgtgatctgaaagtgaatcattccatgaatagatatctatctaatgtgataatggaatataagcaaa  
 gatgtacaatccaatttctgattcaatagaagccccaaagggtcattatgtaaccaaaaaggatagataatgtcaaaaagcaggtctgattaccattctct  
 aatcctaataagaatgaaggacgtggggtttctatgtaaacagatgatttccataggctgaatgaccttctcataataagaatgtgcacggcttctgctccg  
 gtatggaatgaactataatctgagatcgatcagtgattccatgattataagttcattaccctagcgcacctcccttcttggcgggacagatcactaattctttattcca  
 gttagtaagaggatctgactaagaatagacctagcagctaaaagggtatcctgagcaattgcaaaatgggttccattgatacttctggtatagtagatgct  
 atcacacatacagctactcaatcgatggaattgtttgattccttaaaagggtatctctataatctcgcacataagggtttattcttggtttctcagtcattaataactt  
 actatttttagataatagtagatagaaagacgctcgaaggagctcattgaaaccaagaataatagcctctgcttccatccaccacagaatagatagatttccga  
 agaacctgctatgaggaaagcctctagggataagagacataggctaaagagagagccaaaaaggatcttctgtataatctgcaataatctgaaatgtt  
 atcagttccggtagtagacaataatacaatgcaagcaaaatgcttagattcagggatagataaaagcatataagttatcattgcttcatatccatctattgagt  
 ctcaacaatttcccaataatcactatctgattgctccatggcgaatgcaagcatactgtttctgcttctgattgagtaagcaagagattcccaatcactgct  
 aagaatagctgatttccagaagaatgcccattcgttggatgagaataaaaggaaatcagaaattcgcgtgctgaagctgaagcagcaacttccgaaagt  
 cagaagaaaaaacgactggagtggggggagtcagatcgaaagagattctctccttctctctatgcaaaaactgctagacttctctcgcacggc  
 tcttaagtataaaagaaagaaacttgtcttcttttggattaccttccctgcgtatgataagaccgaatcatttcttctgaaatcatttcaaaagaactac  
 taactctaaacttctgagaaatctctcagtggttgaatgactgacttttcaatccttccgaccttgggtcctgaggaagcagaaaggttgaaatagaac  
 catctgatttgattcgtcccaatagccatgagatgacatcttagggatgaccttttgaacggatgctcctattaccactgtagtctgaaaggattgaaaccactat

gtagcatctacgtcgataatcaagcattgtatactgtaatactgtaggactaccgtaataacgacttgcaaaaatggatctgtttatcataaaagatt  
cgttgttctgacctgttcaacttaattgttttgaacaaaagacacaaaatcttggtaaaagtttctgcttggtcggagtgagggatagcatttctctgata  
tctatggagttttgcaaaaacccaaacacctcagagatagatagaggtaggatgttgcgaacgaaccacacttctgtagacgtaggagtcacatgata  
ggggctgggaaaagcgtgaaccaagtctctacgtaggtatagcgaactgaatctctggggagttatacattgtgtatgataagaccgttcaacatctt  
gaagctcgtatccccccgatgaaccatagccaagagaacatgaaccagaatagaagagctgccccacctgagtaaatattcatagtagcctcatta  
gaccgtagatctctctgttatccagacaataggtaggacataaactgaacatctgtagctacaagatagttaltaatcgttagcaccacataaaaacatc  
ccctagagtagctgttaatacgaataacagaactctgtatagccattctgtacatcagaagaatagggcacaataaagtgaacataaaaaataa  
gaaatgaaagattcgtgaaattgtctgttggaaattcccgaagctaatataggtctctcctccatcggacaataaggcgcttatgcttataccttatt  
aagagatgaaatagaaccaaggcttctctgtatcagaggttaaatcgtatcagaagaagaataggccaaaataggatactctgggaaaatgaacttc  
cctggaagagaagcaaatgaaacgctttcataaaaaatctcgtagaatcagaatgaagtgttcattctgtacatgccagatcatgaattgataactc  
gaaaatgcccgaattgtttcgaattggatggttaccggaatccccatgaataggatcaaaccttattccatgctatccataagatttcttcttattc  
agccccggagagggcattgtagcattgttctgtttcttcttcttcttcttcttcttcttcttcttcttcttcttcttcttcttcttcttcttct  
tatgatccatgtgtctacatacctagattctggtatcgtatgaaatggtcgaagagctctatgttcccttgccattctatgagtcgcttcttttgc  
ccacccccctggcagcatctactaattcgaacttaattgaaagccataattcgaaccggagcgttgggatcttctaataaccaacgaatgcaagtct  
cttgtttagatcctattcaatcgaacttccgctgtagcttttattacgcttctgtttactcctataatggggttactctagtagcttggcgttaa  
gaaatggtctgtttggaatcttttccagctcgtatagaaatgataagccaatgatttttccgcttctcatabaacggttaaccacatgtaact  
gaaatggtcgtttggatcgtttcgtcgtcagtagctcgcgtcgaatcgtcgtgaaagaggttcaagaaatcttctttataagggctaaaaaac  
ttctataggatctatgagatcagtaggaattcagttactcaacttaaaatgagatctgttccccttctccgctaggtcggaaatcctgtatttc  
accatcaagccttagggttccgaatagtgtaatggaagaagaagctcctgaatcattgctatttgactcggacctgttctgaaaaagctgaggt  
gttgcacggaacaagtaagggaaaacccctgaagaatctcatattgacctgacatataagagttccgaatcgaatccttgaagaagatctttgct  
gtagcctgctccagctcccctacgaaacttctgtattgggttagccatacacttecatgttctagcgattcacatggcatcacaatgatacaagct  
atctacaacgcactagaacgccctgttgcagattcttactcgcacagcatcagggcctcctgaataatcgcgatctcaccaccggtaaaccttaac  
tctactaatacactacagaatgttctgtaaaatgccaatcaccaggtatataagcagtgattcaaacccagaggtaaacgtactctggcaactt  
gttgggtttttgggttgatagtgaaagctgacagataagcaccctctgtcctctacagaaccgtacatgagatttccactacacggctcctctg  
ttegaaggatccttctctctctggagagctcctcttccactccgtccgaagactaactaagaccaattgagtcacgtttcatgttcaattgaa  
atftatgattaagagaagattgtctttacaaacatatcggtatcaaacacgtcttataaagaagaatcttctcggatcaatcccctggcccct  
gaaacagaagatccttccgaattcttctcatttggatctggtcttctatctcgtactatfttttctgtttattcttatttatttatttcttctt  
atccctatcctctagtgacagcgttgcataatagagaaccttctctgtatgaatctatatttccattccaatttctcccgaacttcccaga  
ggatccaaaattgacgggtaattgtgagcttatcatcgggttaggcacttcaaataggaatcatttctaactggcttctgtgttggtagtcgccc  
tcgatgacatgttgttgaaaggatctatatgatccgatcgattgcataagaccgctgtagcaataagaacgggaaagtatacagaagaagag  
atftcgtattctatataatagttcgttctatttctagatatttctatatttagtatttagtagtactatttattgtagcgaatccggcctgtg  
tgatgaactgtcggcaccagctccatcttctctgtgaccgaggagaagggggtcagcagggaagaggttaccatgagagaagcagagaggt  
cttcaaatatggaacatgattctggaatgcacatgattggtctcctatcctgatccgaatgaatcagcttcttacagaggcaacttcttctt  
ggatagcaagtcgaaatctgtctcggtagacatggttcttactatgaaatcataatgaaaatgaagtagtaaatgggagggtaccattatctt  
tgtgttctaaagagaaggaattgttccattcatgttccaggctcaaaaagggtgtaaacagatagaactcctggaatgaaatgaaaagaaatg  
agttcctcggaaatgtaagatcttggcgcaagaagaagggtcaccatacatctgacttggctctctccccttcttttaagaataaccagtc  
cctaccagatcgaatagaacatgctgaacaagatcttctatgaaacctgctcattatgactatcataatgtgtgaaaagaaagcccggagg  
atccatagcaactcatttcgataggaccggtgacaattgaatcaatfttccatttctgactatcataatgtgtgaaaagaaagcccggagg  
cttgagttctcggccttaggtatctgttaattcttctcaggggagcggggaaggatataactagcggttagagtgacctgtggtggaatgat  
cagttcagcctgattatcccataaccaatgtgagttttctatttctgacttactcccccccagcagcgaacgggaatggataagaggtggtg  
tagggtaggggttgcatactgctgggtgacactccagcgaataatctgaagcagcatggatcagaagtattcctggaaagacaattcgaatc  
tacgaataaggaagctataagtatgcaactatgaatcctatggaggttcgatcctgcctcagaggaacgctggcggcatgcttaacacatg  
gaaatggtgttccagtgccgaacgggtgagtaacgcgtaagaacctgccttgggaggggaacaacactgaaacgggttctatccccttag  
gcaaaaggagaatccccaaggagggtcgcgctgtatgaggtggtgaggaatagcttaccaggcgaatgactagtagcgtccgagaggatg  
cagccacactgggactgagacacggccagactcctcagggaggagcagtgagggaatttccgaatggcgaaaacgctgacggagcaatgccc  
ggtggaagggcaccgggtcgtcaacttcttctcggagaagaacaatgacgggtatctgaggaataagcctggtactctgtgcccagcagcgcg  
agaggatgcaagcgtatccggaatgattggggtgaaagcgtctgtagggtggttcaagtcgcccgaatcccagggtcaacctggacagcgg  
actaccaagctggagtagcggtaggggagcgggaattcgggtggagcgggtgaaatgagcattgagatcggaaagacaacacggcgaagcact  
cgactgactgagagacgaagcttaggggagcagaatgggttctgagcagcttaggtatcctagctgaacgatggatactaggtgctgtgactg  
tggttaattcgtgcaaacggaagaacctaccagggttagcatcgcgaactccttgaagagaggggtgccctgggaacggcagacaggtgct  
ggctgtcagcctgtccgttaaggttgggttaagctcgaacgagcgaacctcgtgtttagttgccactatgagtttgaacctgaacagccggg  
gtaagccggagggaaggagaggtaggcgaatcctatgccctggcgacacacgtgctacaatggcgggacaaggggtcgatctgcg  
agggtgagtaactcaaaaaccctgctcagttcggattgagggtgcaactcgtcgtgatgaagcaggaatcgtgataatcggcggtcagcc  
gaatccgttccggcctgtacacaccgcccgcactataaggagctgcccattgttgagtacttacccttaaccgtaaggaggggatgctaa  
ggctagc

ttgcactggagtgaaagcgaacaaggtagccgactggaaagtgccgctggatcacctctttcaggagagcctaagcttattggtatttggttgac  
actgcttcacgccccaaaagaagcagctactgtctgagctaaactggataggaagcttcttctggttagggtaagtaagaccaagctcatgagcttattactca  
ggcggaaacaattagtgtatgtagatgagatccctttttagctccccatccccccccggtggtggtggcggcatggggatgcaaaaggaaaggatggag  
ttttctcgttttggcgtagcagccctccaaaggaggccgcgcagcggcttattagctcagtgtagagcgcgccctgataatgctgctgtgctgggc  
tgtgagggctctcagccatgtagatgctcaatgctcatcagcgcctgaccgaaagatgtagatcacaagcaccatgagctggcgtactcctctgttgaat  
cggagtttgaaccaacaacttctcctcagggagtagatggggcgattcaggtgagatccatgtagatcaactttctattcactgctgggatccggcggtcc  
ggggggggcactacggctcctctctctcagaatccatacatcccttcatgctatggagagctatctctcagcagaggttaggttcgtcctcaatgggaaat  
ggagcaccaacaacgcatcttccagaccaagaactacgagatcccccttcttctgggggtgacggaggatcgtaccattcagcctttttctatgctttccc  
ggcggctggagaaaagcagcaatagacttcccttctcctctctctgaaaggaaagacgtgaaatcttttcttccgaggggaccaggaggttgatct  
agccataagaggaatgctgtgataataagccacttctgtcttctgactcctaagtcactacgagcgcctcgtacagtgcaatgggatgtgctattatctatct  
ctgactcgaatgggagcagagcaggttgaaaaaggatcttagagtgtctagggtggccagagggcttcttaacgcttcttttctgcccacggaggtatt  
tcccaaggactgcatgtaagggggagaagggaagcacaactgaagagcgcagtaaacggagaggtgtatgctgctgggaaaggatgaatcgtc  
ccgaaaaaggatcttattctcctcaatggttggatcgtaggggcgtatgattactcagggcggaggtctgttcaagtccaggtggccagctgcgc  
agggaaaaagatagaagaactctgacttctcactccactggctcgggggatagctcagttgtagagctccgcttgcactgggctgttgcga  
ttacgggttggctgtcaatgtccaggcgttaaggttagtattttagctgaaccgggtgctcacttttctaagtaaggggaaaggactgaaacatccactga  
aagacttactgagcaaaaagatggcgtgtcaaaaagtagaggaggttaggtggcagttgctcagatctagtagatcgtacatggacgatagttggagtc  
ggcggctccttaggcttccctctctgggatccctgggaaagaggtcaagttggccctgcaatagctttagcactatccttcaaccctttagcgaatg  
tggcaaaaggaaagcaaatcagaccgacccttctccacccgtaggaactacgagatcccccaaggagccttcggctccaggggtcagggacc  
gacatagaccctgtcaataagtggaacacattagccctcctcctgggtggcagtaagggtcgggaaaggcaatcactgttcttaaaaccagcattcta  
agttaagatacaagagctggggcgaaaaaggggagagctccccgttctggttctctgttagctggattccccgaaaccacaagaatccttagaatgggattcca  
actcagcactttttttgagattttagaagagttgctcttggagagcacagtagtaaaagtgttagctgttctggggggagttattgtctatggtggcctt  
atgtagaacccgtcggggagcctgagagcgggtgtttaccctgtggcgatgtagcgggtcagctccgttctccagcccgtgaacttagcgataactat  
gatagcaccgaatttggcaattcggcagttcgtatgattcgcattcatggaggtgataagatccttccatttagtagcaccttaggatggcatagccttaacgtta  
atggcgaggttcaaaagaggaaggcttgggtgatacctaggtaccagagagcaggaaggcgtagcaagcagcaaatgctcggggaggtgaaata  
agcatagatccggagatttcccaataagtcacactttgaactgctgctgaatccatgagcagcgaagacaactggcgaactgaaacatcttagtagccaga  
ggaaaaaagcaaaagcattcccgtagtagcggcgagcgaatgggagcagcctaaaccgtgaaacggggtgtgggagagcaatacaagcgttgtgct  
gctagcgaagcgggtgagtgccgacccttagtgtaagtcagtagccgaagcactactagcttaccgctgaccgagtagcatggggcagctggaat  
cccgtgtgaatcagcaaggacccttgcaggtaaaactcctgggtgaccgatagcgaagtagaccgtgagggaaaggtgaaagaacccccagttgggta  
gtgaaatagacgtgaaaccgtgctgagctcccaagcagtgggaggggaaagtgtctgaccgctgctgtgaaagatgagccggcactcatagggcagt  
ggcttggtaagggaaacggaaccaccggagccgtagcgaagcgagcttctatagggcgattgtcactgctttaggaccgaaacctgggtgatctatccatgac  
caggatgaagcttggatgaaactaagcagaggtccgaaccgactgattgaaagaatcagcgatgattgtggttaggggtgaaatgccactcgaaccagag  
ctagctggttctccccgaaatgctttagggcgagcaggttactggacatctaggggtaaagcactgtttcgggtcgggctgcgcgagcgggtaccaaatcagagc  
aaactgaaactagatgatacccaaaaataacaggggtcaaggtcggccagtgagacgatgggggataagcttcatctcagagaggaaacagcccggatca  
ccagtaagcccccaatgaccgctcagtgataaaggaggtgggggtgaaagacagccagggaggttgcctagaagcagccacctttaaagagtgctgaat  
agctcactgatcagcgccttgcgtgaaatgaacggggtaagcagatctccgaagctgtgggatgcaaaatgcatcggttaggggagcgttccgccttaga  
gggaaagcaaccgcgaaagcgggggtcagcaagcggaaagcagaaatgctgcttagtaaacgaaacattggtgagaatccaatgccccgaaacccaagg  
ttctcctcgcaaggttctccacggaggggtgagtcaggcctaagatcagggcgaagggcgtagtcgatgacaacaggtcaatattctgtactaccctgttgg  
tacggaggagcggagggctaggttagccgaaagatggttataaggttaagacacaaggtgaccctgcttttcaggtaagaaggggtagagaaaatgctc  
gagccgaggtccgagtaaacgctgagcgcgtgaagatgagccccgtggactagccattgcttccacagggctcataccagggcgtacggcgtgaagt  
atgtaaccatgccatactccaggaagcctcgaacgaccttcaaaaagggtactgtaccgaaaccgacacaggtgggttaggtgagaataccttagggg  
cgcgagacaactctctaaagaaactcggcaaaatagccccgtaactctgggagaaagggtgcccccctcgcaaaagggggtcgcagtgaccagggccggcg  
actgtttacaaaacacaggtctccgaaagtcgtaagaccatgtatggggctgacgcctgcccagtgccggaaaggtcaaggaaagttggtgactgatgacag  
ggaaagccggcgaccgaaagccccgtgaaagggcgttaactataacggtcctaaggtagcgaatcttctggtgtaagttccgaccgacgaaagggcgt  
aacgatctggcactgtctcggagagagactcgggtgaaatagatgtctgtgaaagatcggactacctgacactggacagaaagacctatgaaacttactgtt  
ccctgggattgcttggccttctcgcagcttaggtggaagcgaaagggcccccttccggggggcccagccatcagtgagataccactctggaaga  
gctcggatttaaccttgtcagaccggcgccaaggacagctcaggttagacagtttctatggggcgtaggcctcccaaaaggtaacggagcgtgcaaa  
ggtttcctcggccagacgacattggtctcagtgcaaaagcagaaggaggttactgcaagactcaccgctcagcagagacgaaagtcggccttagtga  
tccgacggtccgagtggaaggccgctcgaacggataaaagtactctagggataaacaggtgatcttcccaagagtcacatcagcgggaaaggttggca  
cctcgtatgctgctctcgcacctggagctgtaggtgttccaagggttggctgttcccaatgctggtactgagctgggttcagaacgtctgagacagt  
tcggtcatalccggtgtggcgttagagcattgagaggacttccctagtagcagaggaccgggaaagcagcactctggttaccaggtatctgctacggt  
aaacgtgggttagccaagtgcggagagataactgctgaaagcatataagtagtaagcccacccaagatgagctctctcctcacttccctagacctccg  
gtagcacagccgagacagcaggggttctccaccataggggatggagcagacaagcatgaaatagataaggttagcggcgagacgagccgtttaaata  
ggtgtcaagtggaagtcagtgatgtagctgagcctcctaacgaacgaacgattgaaacttctcctacagcactgatcaatcagcagcacttcca  
tctatcttattttcaacttctgatgaaaagatgaaaaaaccaaaaaagcttctgccccttcttcttggatagatagagagggggcagagcccttgggtc  
cctccagtaagaattgggcttcaaaacttagcaatatttctctatgcttctcctcttctgattctgctgcttagggctagaggaaccacaccaat  
ccatcccgaatttgggtttaaacttactcgggtgacgatactgtaggggaggtcctcggcgaataagctcagatccagaatgataaaaagcttaacacttatt

ttgacttttctactattttgaatacgaaaaagatccaaatccaaatgcaaaaggctgtcttattcaaaacctcaatcatcacatcccctctcccacttcacacctggga  
acgcactgttctatagagaaaagggttccatcttcaaccgaaatgaaatgctgaggagagggttcttttgggggtacccccgggaagagat  
ccagtggagacggggtggcctgtagctcagaggattagacacgtggctacgaaccacgggtgctgggggttcgaatccctcctgccacagccttccaaag  
gggaagggtcttactttcccctgagggtaggaaaaccatgatcgggatagcggacgtaaagctattgaactgggtatgctttcttcttctgcaagtggaaatc  
agaacagaatgtgatacgtgagataaaatgcaatagaacaaggatagcgaacgggttactactcctaagggtcaagcctttaaattcaattcttattctt  
acattaaagaatgaatcaaatctcccagtaggattcgaacctacgaccagtcagttacagccgaccgctctaccactgagctactgaggaacaagggggattc  
gacctctagagttcaactcccgtctcaacccatgaacaatatgagtcggaagcttcttctgaactcccggaaattctctgtagtggtccctccatgcctcattcat  
aggtaagcccagagtggtcttattcttcttctcactcctagcacttctcatcttfaatatccatccccttggcttattgacataagagatgctattatagctatctt  
tctatataatgaaaagcaagaattctcatgaaacatcgaaatgtgcatatagaaaactcaaaagaaaaaaggagaccatgccatgatttcaaatctt  
tctacttagtagtcaagttctcgtatgaggataaattcggctgtgctggctggactctattatgggttctgaccacattctccatgggtccctcttagatcttctc  
caatctggattagggaagaaggatattcgcgactcctggtggttcttattggggcagctcatgatctcatatcgaatcttaccctctgcatcttcttctta  
gctaaacgggtggaagatccatcaattggtatatacgtgactcaaaaaacggatctgaatgtgactgaaatgcacgatcttcacaggtatcatttccacgatacct  
aaaagggtgaaatagcatttcaacatttctataagaaaagggttccattcttgagaaatggattctatacaactatagctattgcaataaagaagaaagaa  
actaataagaatcgaagacgcggaatggtatgaaatagagaaatctctggtttctgttctgaaaatattctatctctcctagacgccgtagagaattga  
gaaattctgcttcaattctgactcgtaatggaaaggtacggaaggatccatcttggcaatgaaaactacataaaaaactctggcaaatcgaatcagg  
ccaagcgtcttaatacatatgcaaaaaatcatttggcccaccattgattagaatgaaatgctgattggttgatacgaataatggcaggtggttcag  
tatgtaaggatagatgatacacaattcatttagagttacttaatagcctatttctataccatctctatcccgtgaaattctcagccgaaagatggatgcatac  
atctaaataaaaagaatgacccctctatccaaatccaatttgcacgataaaataaactcaaaatccagtagtagatgaataatgcaatttctgtgtacgattag  
aataactcaaaaactgacataatttttttctgtagcaaaaatcatgaaaaagaaaggagtagaaaaatttggatttggtaaaagaaagaaagaa  
gaaaactgggttctgtgaattcaagattcagttcaccataagatagcggacttgcctcacatttgaattcacaaaaagattttctcggaaagaggtctc  
cgaagacttttggaaaacgtcaactgttctgcttatttggcaaaagaaaatagagtagctataagaaatcaatcagtcagttggatattaggagcgtgtaattca  
tcgttcgaatttttcttatttattagtagtcttattagtagtcttatttgcattttagagccctgtttgaggaaatcattggaataatccatttctcgaataatgaatta  
aggaaagaaagatagctaccgcttacaagaaaagatcctatgatagcaaatggccctcagcaccatcaatgcatggttcttcgactgacgttactctc  
gatggtgaaatgattgattgtaaccatattaggctatttaccagaggaatggaaaaatcggcaaataggaaagctacttaggcagagatagggaattc  
cttaagaaagaaaaaagaataagaacacagatacaataaaaaaaagaataaataagacgaaatcgaactcccctacatatttatttctctctatacaaaa  
actagcaagactactcattgtaattccatcaatgacacctgtcgaaaaactcgttagttcggtaatcctcttataccaaggtaaaagctctagatagaaaa  
tatctatafaaccgctattatagcaactatatactttttttagttgatgaaaaaacttttctggaccccttttacaaggaattattaatcctcaatctgaaaa  
aaaagtagtaagcagatccataaaacatatactatgaatagaccaaaaatagctagacttacagaagaattgcatagtgataaattcatatgaattttaggaagatt  
agaacttcttggaaaaagtgattgagggttagccacttggataatggttaattcccctatttcttattcaaaaatggattcctatagatccaataacaaagtaaca  
agcagtaataaagaagaggaaatgcatagatttcccgttcatgaggatagacaaaaggtttttagtcccctgaagtagtaaaaggaccctatcttctctgt  
attaacatgaatttggatagatttggtaaaaaaagaactccacttctgctgtgataaaacgaaatctctattgactcctttagatattctttcccataacgatatt  
gaatacaacgaatcctttagtactactgtaatttgaatgaacgcgaatccatcaaaaagtaagtaaatatccgaaacataaaaacgcagtaactctgc  
agtaaaagaaagctatttccaaaaaggggtgaatataaccaactactaagatttcttggaccagaagcaagcaggtggaataccacaagagaaa  
gggtaccccataaaaaagttcttgaattggaatgatttcttaaacccataaagaacatattctgactttatctggtgaatccaacaagaggttccattga  
atgaataacagatccggatcccaagaataaagccttcaataagcagatgagatcaaatggaataaagcagcttataaagcctatacctagactaactatcat  
ataaccaattgagacattgtagaataaggcttcttataatctctgagcaagagctaaagtgctcctaagaaaagtgtagtgacttataaagaatga  
aactcattcaaaaggtagatgaaaagaggaagatcagctataaagaaatcccgcagcaaccatagttgctgctgtgataagagctgaaatggggg  
tgggtcctccatagcctggtaaccatagtaagagggaattgtccgatttgcactgcaccaaggaataaataaaaagcacaaaaatagtaagcaag  
agttaatctcatttaggaatcagttattagctattttaaacaatcccgaactcaaaactcctgttatcaaaaaaacctagaattcctaataacagaccaaaaac  
ccctacagattagttacaaaagcttttgacaagcactcgtcgaattggcgtgtaaaacaaaagcctatcaataaataaggaaacacattcccacaagctcccaaaa  
aaaaataaattgatacaaatggaactagtaaccaatccaacatggaagtattgaaaaaactatataaacaataatcctcaaatatccctcctcgtgagacataatc  
atcactataaataagaaccaggattcctacagtagtaattgatttaacataatagaagtaagcgggtcgaattagatccaaattcaaggaataatcattgacgg  
tccaagaccatagattgatagatagaactccatttattgtgaatagacaggtgactgagaatccatagctatactataaagtaaaacactaggaagaccat  
atgacagcaagatttttggctgttgaacaagaaaaagtcacaacccttgcataaataactggaagtgggagaagaggattaccatgcattgatgat  
gttcataaagaaagaaatgcaattttacttgaataatttactcaattttctataaattgaaaaagttccgattcacaactaattcttattcttgaaggaaata  
aaaaatactagaattcttaattttcaaaaatttctcattgaaacaatcaaaaaataagaataggtttgggttaaagcaaaaagttatgaataactcgttacta  
gttattactaaagaggacttttataaatacaaaaaaagattgaaatcttatttataatttttattataaataagagcagctccctgttctgtaactcaattgatt  
ggaattcaattctggaactttaaataactattgattgaaatttccctcttattatctccgcttattatggggataggccccataccttatactgtataggagat  
tactgaaatataaattgatttaatagaaaaccttggatatacttataatataaacaagctaaaaaaaatagaaatgtaaaaaactctgcttattccgattag  
acaaaatgaagtaaaaagaattcgaattcaatctttagtatcagatataaactaagaaaaagaaagaaatggaattgatttggcgaatagatgcttccac  
atacaactagaaaaagtaattccttttgaatggcagttcaaaaaacgtactcgtatcaaaaaagcgtattcgtaaaaactttggaagaaaaagacttatttcc  
catagtaaatcttattctttagcaaaaatcaagatcttctggcgtcagcgagcatccaaaacaaagggttttctcggcaacaaacaacaaataatagggtttg  
ggataatgaattgacctatccccaaaaaattccaattatttaatatgaataataggaaataatgagttactttatgtgctgaattcctcggtaacat  
attctagaacaaactctctgatataaaaaaagggttttggatagctgactcaaatcttcttctatcaatgaactttctgaaatagaatccgtataataaaaa  
aaagggtgattctattgaaaagtagattctcgaataagacttacaacttctactctatcttaataaacaataaataatgattctattgcaactgagaaaa

atgttccaactcttcaagttcttattggcacaagcaaatTTTTgttaaaaaatcgaacgatactaccaaacgaagctattttaaagaagattctaagtctaa  
attctatggaatctccaatctcgacgattcgcgagaaaataacttaattctttaaataaacctattttcaacttagccgccatggtgaaattgtagacacgctgctc  
ttaggaagcagtgctcaagcatctcggtcagtcgagtgccgagtgccgagtgctgaaaaagaatacaatagattataaaaaaaaggattcaatcgaatttcaatt  
tgaatgggaccttctctatgctattgcaacttfaaacataactaactatattcttctcaacaatttcaattgtgattacgattcatttaaaccttattagttcgtga  
acttgggggattgctgattcgtcagaaaaagggaatgataccacttttctgtataacaggattcttagttctcgttgggcttctgggacatttccattaaagtaatt  
atatgagtcattgatcttcttcatgggctctgtatattctcatatgattcctaagatacagaactctaaaaatgatttaagcacaataactacgccgagactatttaac  
gcaaggcttggccacgctgggcttfttaactgaaatgcatcaatccacaatactagctctgctacaatctcagtggttaatgatgcatgctcagatgatgtactaag  
ctatgctgactctttgtcggatccttattatccgcccttctaatgattagattcgaagaatttagatttctttcgaaaaagaagaaatgtttgcttaaacatttt  
tcttfaatgagattgaatattctatgcaaaaaagaagtgctttaaagaacaccttttcttatttccaattattcaaatatcaattaattgagcgtttggattcttgagtt  
ctcgtgctattagctagggttaccctttaaaccataggtattcttgggagcagatgggctaagagggcgtgggacactggaattgggatcctaaagaactt  
gggcatttattactggaccatattgcaatttattacatagtagaacaataccaaattggaagggtacgaagtcagcattgtagctccataggattcttataattgg  
atctgttatttggatcaatctattaggaataggtttacatagttatggttatttaccatctaaatgattacataacataaaaccttaagaaatggaaaaacttc  
cattttgtgttgattgagaacccttgaacgcttctcaaaagggttcaaaaatcagatagatcttaattgactcttttcttctgaaatttttagtattccactat  
ggaatatagagcggactagtagaagaaaaaaactatttaggataaattggataacagacgctctaccctgtcaacggatagcggagagaacaaaactggat  
aaataccgattccttactgtgtaaaaaatacagattaaaagaaggtctcgcggggcgaactctcaaaattgcttggaaatgaaatagctgtatccata  
gaaatctgtcgaacatagataaataaataataggagttatatacttcaattgacattacaaaagtaattggcattaaacagaaatgggactagtaag  
agccaaaaaataactaattccgcaacaaaaccactcattctgtgaaggcagagaagccattgaaaaactaataacatggttaaaaaatggcattgggata  
gaaaccctcccagttctcgaataaaacaggcgaattctatcaaaagggtccgctaagaaaaaagtgtagcccaataatccatgggataatattgtaaa  
atagctccattgagcccaatggtgttaggaaccaatcctataaataatgaaaccatgtgagagacggaggaatgaggtactttttgaaattgcttggcgaaga  
gaaattgaaagctgcatagattattgcatcgtcttattactaaccaggggaaaatagataatgagcatgaggtaaacattccattatgatccgaatcaatccgta  
tctccatcttfaataggattcccgtaaaagcatacatgtactgtaatgcttccccatgggtactgtgaaccacgtatgtaggggtataatcggcaattgacag  
cataagcaataagggaagccaaaataaataatgatttccaatgtgagggatgattgattaataatcttccaatctaatcttggcttggaaaccgtataagccat  
acctagaactccgattaagaaaaaaatggaaccctgcatgatacaaaaataaactttgtagctgaatagagacgcctctccccccacatggataaaagtaagt  
aaacaggaatatttcaactcccacatgataaaaaaaagtaaaaggctcgcgaagaaaataatctattgaccgctatacattgctagcagcaggaaatagaata  
tcgggaattccgggtaaccggcgaagctgctaaagtagctaaagtagctataaatctgtcaataaaatagatcctaatgaaagtcacgattcccaatctccagtg  
gaaattgaaagcatctatccattagaatcctcttfaatggattaaggatcctcaattggaatgataacagaatgcataagcattagaaggaattctaataaca  
aatagacatagataaccactaacgattttgttcccctatgaggtaaaaaaaaatgaaccggcaaatatggcaaaacaacagattgtaaccaaggaaaa  
gaactcatgataaagtgataaagacaagatagctttgaccagaaaagccgtctcattattttgagcacaggctctcggtaagaggaaatcagacgattcaag  
tggaaattttgtaacgatcaataagatagagccatctcgggttctcaggtcctaataaacgggacacttaaaaaatctgttggcagcgggattcgcatt  
cttacaaccacacaatctcgttcttggcgcggaagcaatttcttggctttacatccatccaaggtatcttataatcatctgttggacaagctcgtacacattg  
agtgcacatctatcatgatacaatftttacggaatgtgacattggatctataaatttcttccaacataaaaaatttctgatctgtaaaaatgaaatgactatataca  
atcaaatgattgtagacaccagacgaagcaatggttatccaactcaacaataatgcaatataattcttaatccgttggtagaagagcagaaagagccaagag  
acttgaatttgggctcaacaatcataattatagcaattgtatatacgaattcgaattagccaataaattggctatcgtctttcaataataaatttgaatattcaattgc  
aatatcaatgaattgcaaaaatcaactaagtaaaaaagaactatggaataactactcaaaaaatagatattctcaataataaataatgattcatgtaatttcatatt  
attattatattgtcccttgtttagaagattctatgcttaatttcaaaaaatagattgattgatacagattgatttctattacgatggatggaagaaagaatggataac  
caatagctgctcagcagccgcaagggtctatacaaaaaatgcaaaaatgctccttfaatggcgctatcaataatgacagaaaatgtagcagaaatgtagaattat  
gaattcagataagttcaaggcatattagagctcaaccatgttctggttctgatcaatccatagataccaatcgaataaataagacactcaaaaaatgtagcctc  
aaacatcattaaactccttcaatctcatttcaatgctgggacaagaattgaaaccgattgaaatagtagaacaattacacaacaaaagagaagaaag  
aaggtatttggcagtagatgggtttactaaatcaaaattgtgttctttagtatttttagattgaaatcttataatttgaactcattcaagatttcttattccgag  
ccatagtaattgcacttafaaagaaactagaagaattatgaaatgagttcaaatggaagataaaaaatcgggtgtaaatgaaatcccaatttggtaacgttattatga  
gacctgttctactatttgggtgatctgtatgccaagaattccatccatgagctatctgggatagtatgctattgtaaaaaggaatgattatacaaacgagtgaa  
tgaaccatctccaatagtccaaaaatcttacttttagaccattctgagccattacgaacattacgcaaatatgatcaagacattttagctcccacataaataagaa  
gttggccacagctcaaaagtaggaattcaataaataatagaaataggatatacaaacagaactaatctagcgaaaaaagcagaaaaagttgggttggtaagta  
accaccctagacccttagtagaagaacaaatcccccaaatagcacaagaatttcatgtattggccaggtaaatccattatgataagaagaataatagataa  
atftttcatgaactgactaaaactaaaagattcaagggaagaaaaagggtattagaaatTTTTgtatattgtatataagttcttctatagttagaatcacatcacgaaa  
atctactctggtttaaactcaggaataatttgaataagcagtaggtattcgttttcttctagttgtaaaagacttttggattcaacaaaaaaatctagtaacgta  
cgttcttgaattccaagatttttctcgtctatttactttaggttgaattcctaattgttgaattgttaactcctccattatggagattgtaaccgactcaagcaatttga  
gtaattcaattcatgacgatcataagtagaagttcatattctcagtcattgataaacagtttctggacagctacacacaattaccacaaaatatacaaaactccgaa  
atcaactataatgaagcaattgttctttaaataatcttcaaatctcaatccacaagaggtatgctatagggcatacgcgaacacatactcacaagcaatacatt  
tatcaaatcaaaaggattcggccccgaaacgctccgatgtaattgattttcataggggtatgtaaacgttataaggtaaacgatttgggtggataaggttaattatga  
aacttggacaaatgacctgctcgcgtattgttggaccataactcatgaaccgattaccatagggacataattcgaataatctatgaaaaggtatgttcttctc  
ttgttgagagaactttgttgaataatcttactgttattgtattatctattttatagtgaaacaagttgggaagaaagttgtaataagagattgccagggaaataggt  
aaaagaatttccatccaagatttaataactgatccattctcatctgggtaaaagtcctctattgtgatagaatgaagagaataaataagctttagttaaataa  
agatactattgtacttctagaattccaacattttattcatttggaaaaatccaaaaaggatataagggaaatagacaattccaccgcctaagtagagaactgta  
caataaagaggaactaataaatttaggtaagaacaagataaaataaacataatttgaaccagaatattcggtttgataacctgctactaattctcctccgtctg  
gtaaatcaaaaggtaattcttccattccgcaaaagaagaattagaaaaaccagaaaacataggtgacgcaaaagattccatcaaaaaaacatttttggact

gtgcttcaactatatacaactgtacttgaactgttgataatcatagtcgacgataacatcacagttcccaccgctattccaaaaccgtacatgaaaccttagttcatac  
gctcctctatgatcagaaaaaggaaagtactgttcttctgttattatcttctggcgtagttagaattatcagataaaatcgatttcaacgtccaaatagaccaa  
aggaaactgtctgctagaataaaaaaacgcttcggaatcatctcatcttataatataatggacttttcttcttgcagcaataactaatcttggataaaactc  
ttataacaatataaacgaaaaagagttgggtattatgtcatgaagaattctgtatgaataggataaacgacggaaaagaataaaagatctttttttgtattgattc  
catacttttgccttattcttcccagggggtattfaaaagaaaaaaggataaagggttaattcttctgatagccatttcttaacaaggaatgggaacatact  
ctgcatcggaaatccgaagaaagtactactgtctattccaccaattcaagtccttattatgattcctttatgaggaaaaatctaatgcttttagattccctcattactaat  
cctttatgtactttagtgttctaactcctcactaacttttggattcccttatgattacaacttctgtatcgggaatcccttattattgcccgttcaagatatgatgactaa  
tcaaaaaatcacaacttggggaagaatftacaccgcttattgttacttccatttttctgtacataggaaatgagatttttcttttactacaatataagcagtttgg  
tcactcatatagctactgttfaacttactaacctgaatatagaataagaaaggaggataaatattcaatgaatttcagaggaaaaagatccttttaacgaatcga  
cgtagagatattgctagtacaaaaagttaattgggatttcataactaataagattgagcggcagctcgtagaccacctgaaaaagaatattattattgagctatct  
gccataagaagaccaataggagcaacttgaatggcaatccataaaaaacaccaactaagatccgctaaaaacaaaggatattccaaaggataactaaa  
aaactaataaaattgatagctgctatagacggtccaatgctaataagggaatccctcgggatgcaagatatcctttaaanaagtagcttagttccatctgct  
atagcttgaagcagctcccagggggccagcatattcaggaccaatagctgtgtatcgtatcgggatatttcttcttaaccacacaattacgagcttctattgtatt  
cccagtaagagggtcaaaatgggtaagaatccatagctccttaataatcgaatcgaagaaatgatacttctacctgtaccctgtctattatca  
ttcaacgatcaacttctccataatgatatactactacctaataatgctatgatacagccaatttcttttctgactagctgaggaagaattgcaaaataaaaaccg  
ggtgagcaatfttccatccaggggaaagactatcatctcaccagataaattcctaattcacttttgggcttccactctgcataaagcttgtttgacaattc  
aaaattgggtgaaggttttaccagaatcgaatcacaatcattccattcggaaattcttctttaaagcgtcggacttcaaatctcataagggccccagga  
atftttctacagctgttgaatatttgaattcctcattccagctcactaataatgctgtaagatcccttcttttgcatttccacttccaatcgaattga  
ttgtaagactcgaagatcaactttacgaagatccattgtattccagaagctcgaacatggggccgataaagcccaatttaccagcttctcgcctaataaac  
aactcctcaactcgttccaaaaaatgggattctgtgtaataagttgtgataatcaactcctcgtaaaaataatcacagaatctaaactaatcattatc  
taaggcagatcggcagcaactcctccgatcgaagtaattatgcatctcgcatacctgtagcagctcaaatagatcatatataattctctctcttaaaaaataa  
aaaaaaggagctcgcaccgagatctccataaaagtcgaagccatacaagtgagaagctatagcgtcaatttaacataattaccctaataatagctgctctt  
tgggtatttgaattctccaagaattctggtgcaattaccgttattgcttctgtaaacatagtagctaaataatcccaactgttaccataaggttaagattgataatg  
cgttttccgcgatttttccattctctgtgtaaatagcctaataatgggttcacaatcaataacatcttaccatcagagtaacgatcagcgaagaacacatgca  
gatgggtgctgagggccatattgactatcatgagatcttcttctgtaagcggtagactcatalcttcttcttaattcatttccatgaaaatggatttccatga  
ctcaaacgaggtcatcaaaatgcaaaatcgaactactataagactactaataaaataagaaaaaaatcgaacgatgaattaccgctcctaataatcaact  
gactgattaatttctataacgactctatttttcttggcaataagccagcaaacgttgacgttttccaaaagtctcggagaccttccgatgaaaaatcttttctg  
taattccaaatgtgaagcaagctccgtatcttattggtgaactgaatacttgaattcaacagaacccagtttcttcttctttaaaccataaatcaaaaatttct  
tacctcttcttcttctatgattttctgatcagaaaaataaaaaatattgcaatttgaagttattctaatctcgtacacacaaaaatftcaatttactactactg  
gaatttggattttatcagatgcaaatggatttggatagaaggtacattcttattttatagatagaagaaagtcttctatcaaaaataaagaatttctgatttatt  
attgctatatacaattatggaattgatacaccgttaattgatatacttagcaaaatgaacatagcatatgcatccatcttcggctcagaaattcaccgggatagagat  
atggtataagaatagcttaataagtaactcctaatagaatttgggatacatctgtatccttaacatactgaacaactgcccatttctgatcaaaacatagcgattcata  
caagtaaatcttcaatcaatggtgggcaataatgaatttttgcataatgattaaagacgcttggcctgatttccgaatttccagagattttatgatttctcattgcaaa  
atgatggatccttccgtaacttccaaatcagatcagaaatgaaagacatgaaatftcaattctctacggcgttaggagatagatagaatfttccaggaac  
aagaaaaccagaagaatcttctctattcactaccattccgcgctcgaactctattagtttcttcttctttaaagcaatagctatgattgataagaatccatttca  
agtaatggaacacttctctatagaaatggtcgaaaatcgtattccactttaggtatcgtgaaaagtatacctgtgaaagatcgtgcaattcagtcacattcagat  
ccgtttttgagctcatgataacaaatggatgcatctccaccggttagtaagaagaatagatgcagaggtggataatagatcagatagaagatcagatgagct  
gccccataatgaaccaccagagctcgaatatactcttcttccctaatcaagattggagaagaagatcaagaggaccatggaatgtggtcagaaac  
cataatagatccgaccgcaacgaccgaatataatctctcagagaacttagactactaagtagaaaagattgaaaatcagcagatgggtccttttcttctt  
tagagtttctatagcacaatttctgatgttctgatgagaatttctgactttccatataagaagaatagataactataaatgacatcttattgcaataagaccaaagg  
gatgataatataatgataagaggtcctggaagtgaatagaaatagagccactctggccttaccatgaaatgagcagatggaacgggagccactacgaaga  
aattccgggagttacgaagaagctcggactcattgttctatgggtgagagcgggagttgaactcagaggtcgaatcccccttgttctcagatcagctcagtg  
gtagagcgtcggctgttaactgactggtcgtaggtcgaatcctacttggggagatttgaattcattttaaagtaagaataaagaattgaaataaagggttgccttga  
cccttaggagtagtaaccggtcgtatcctgttctattgcaattatctcactcgtatcacattctgttctacgattccactcgcacaaaaggaaagagcacaaccaagt  
tcaatagctttacgtccgtatcccgatcatgttttctaccctcaggggaaagtaaggccttccccttggaaaggctgtggcgagggaggttgaacccc  
cgacaccgtggtcgtagccacgtgcttaactctgagctacagcccaccctcctcactgcatcttcccgggggtaccccccaaaaggaaacctcctctc  
ctcagccatttcttctgggttaagaagatgggaaagcccccttctctataagaacagctcgtccgaggtgtgaagtgggagaggggatgtgatgattgaggt  
ttgaaataagacaccttgcatttggatttgcatttcttcttattcaaaatagtaaaaagtaaaatagaggttgaagcttttattcttctgcatcagctatttgc  
cgcaggacctcccactagatcgtaccgcagtagatttaaccacaaatcgggatgattgtgtgttctctacgcctagacaccagaatatacgaacat  
gaacgaggaagggatgagagaatattggctagtaattgtgaagccccatttctgactggaagggacacaaaggcctctgcccctctctatctatcaaga  
gatggaagggcagagcttttttggtttctcttctcaaaagattgaacatgaagatagatggcaagtgctctgactgattgatcaggtcgtgtaggaacaag  
gttcaaatgttctgttaggatgctcagctgcatacactgcaacttccactgacacctattfaaacggctcgtctcgcctaccttactctatttccatgctct  
gtcgtcctatcccgtatgggtggaagaccgtcgtctcggctgtgctaccggaggtctaggaagtcggaggagagacactatcttgggtgggctta  
ctacttatgctttcagcagttactctccgacttggctaccagcgtttaccgtaggcacgataactggtacaccagaggtcgtcctcccggctcctctgact  
agggaaaggctcctcaatgcttaacgccacaccggataggaccgaactgtctcagacgttctgaaccagctcagctaccgcaatggggcaacagcc  
caacccttgaaccacctacagctccaggtggcgaagagccgacatcaggtgccaaccttcccgtcgtatggactcttggggaagatcagcttctcccta



gagtaactttatccgttgagcgacggccctccactggcaccgtcggatcactaaggccgactttcgtctctgctcagcgggtgagcttgcagtcgaagctcccttc  
tgcctttgactcaggaccaatgctcgtctgcccggaggaacctttgcacgctccgttacttttggaggcctacgccccatagaactgtctactgagactg  
tcccttggcccggggtctgacacaaggtagaatccgagctctccagagtggtatcactgatgctcgggccccggaggggccttcttcgctcca  
cctaagctgcgcagaaaaggccaaaaccaatccagggaacagtaagcttcatagggcttctgtccaggtgcaggtatgctccgatctcacagatgtcta  
ttaccgagctctctccgagacagtcccagatgctacgcttctgtcggggtcgaactaccgacaaggaaatfctaccttagaccgttatagttacggc  
cgccgttaccggggtctcggctcggcggctccctgtcatcagttcaccacttctgtacttccggcactgggcagggcgtcagccccatacatggtcttacgact  
ttcgggagactgtgttttggtaaacagtcgcccgggctggtcactgcgaccccccttggcagggggaccccccttcccgaagtacggggtatfcttccga  
gttcttagagagaggtgtctgcgccctaggtattctctaccaccctgtgtcgtttcgggtacaggtacccttggtaaggtcgtcagcttttctggga  
gtatggcatgggttactactcagcggcgttagcggctgtatgagcctgtggagaagcaatgctatgctccaggggctcactactcagcgtcgcagcgttgg  
actcggacctcggctcaggcatttctctacccttctaccctgaaaaagcagggtcacttgtgtcttaaacctataaacctatttccgctaacctagcctctcc  
gtccctccgtaccaacaagggttagtacaggaaatgactgttgcctacgactacgcttccggcctgatcttaggcctgactcacctccgtggacgaacct  
ggggaggaaaccttgggtttcgggcaatgattctcacaatgtttcgttactcaagccgacattctcgttccgctcgtcagccccgttccgcttcc  
ctctaaggcggaacgctcccctaccgatgattttgacatcccacagctcggcagatcgttagccccgttcatctcagcgaaggcgtcgtatcagtgageta  
ttacgactctttaaagggtgcttcttagcacaacctctgctgtcttgcacccccactcctttatcactgagcggctatttaggggcttagctgggtatccg  
ggctgtttccctctcagcagatgaacttaccctatgctcactggcggcacttgcacccctgttattttgggtcatactatgattcagagtttgcctcatttggacc  
gctcgcgcagcccgcaccgaaacagctgttaccctatgatccagctcaactgctgcctcaacgatttggggagaaccagctagctctgggtcagtggtg  
catttaccctaaaccacaactcatccgctgattctcaacatcagctgggtcggcactctgcttagtttcaacagcttccatctgtcagatgagatcaccaggtt  
cgggtccataagcagtcagaaatccctatgaagactcgttctcactggctccgggtgggttccgttcccttaaccaagcactgcccctatgagcggctcattc  
ttcaacaggccacggttcagagatcactttccctccactgcttgggagctcagcagcgggttccagcttatttcaactaccactgggggttcttccacttccctca  
cgggtactactcgtctcggcaccagaggtatttagccttgaagggtgctcttctgattcacacgggattccacgtgccccatgctactcgggtcagagcgtaa  
gctagtgtcttctggctactggacttttagccataggggtcggcactcaaccgcttccctagcagcacaacgcttattgctctcccacaacccccgtttcacg  
gtttaggctgctcccatttctcgcggcgtactacgggaatcgttttcttcttctctgctactaagatgttccagttccaggttcttctgctctatggat  
tcagcagcagttcaaaagggtgactatttgggaatcctccggatctatgcttatttcaactccccgaagcatttctcgttctcactcctctcgtctgggtac  
ctaggatccaccgaaaccttctcttgaacctcgcattaacgttaaggctatgccatcctaaagggtgctactaaatggaaggatcttaacagctccatgaatgc  
gaaatcatagatgaactccgaattggcaaaatcgggtctatcatagatccgtaagttcagggctggagataagcggactcgaaccgtgacatcccccac  
agggtaaaccaccgctctcagcctccccgacgggttctaccatagaggccaacgatagacaataactccccccgaacacagcttaacatttctactgtactgt  
gctctcaaaagcaactcttcaaaatctcaaaacaaaagggtgctgagttggaatccattcgaagattctgtgttccggggaatcagctacaggagaacca  
ggaacggggagctctcccccttccgcccacttctgatcttaactaaagatgctgttttaagaacgagtgattgcttccgggacttactgcccaccggga  
gagcggacggtaatgttccactattgaacagggtctatggtcggctcgtgacccccggagccgaaggcgtccttgggggtatctcgtatgtctacgggggtg  
gagataatgggggtcggctcatggttttcttcttggccacatttctcctcaaaagggtggaaggagatagtcacatagctattcgaaggcccaactgatcctctt  
ccccagggatcccagatgaggggaagcctagagagccgcccactcaactatgctcatgacgatccatactagatctgaccaactgcccactcactcctctca  
cctttttgacagcccactttttgtctcagtagagctttcagtgccatgtttcagctccttccccactttagaaaaagtgagccaccggttcaggtacaagatactac  
cattaccgctggcaaatagacagccaaccgtaatcgaacgaccacaattgcaagagcggagcttaccactgagctatataccccccgagccaagtggagta  
tgcataaaagagtcagatgcttctctatttcttccctggcgcagctgggcccctcgtgacttgaaccagagacctcgccttgaagtaaatatcgcacctacgatc  
caaccaattgggagagaatcaatagactccttttgggagcgttcatccttcccgaacgagcatalaactctcctgttactgctccttcaagtgtcttctccc  
ttctcccccttaccatggcaagcttgggaaataactcagatgggcagaaaaaggaaggcgttaagagacctcctggcccaaccttagactctaaatgactctt  
ttcaaacctgctctgctcccattcagctcaagagatagataaatgccacatcccattgactgatcagggcgtcgtatgacttagggagtcgaagaccaaga  
agtggcttattatatacaagcattcctttaggtatgacccaacctcgtgtcctcgggaaaggaaaaagaatttccaggttcttccaggaaaggaggtatagg  
gaagtcctattgattgctgttctccagaccgcccggaaaaagcatgaaaaaaggctcgaatggtacgatcctccgtcaccagaaatgaaagggtgatctc  
tagttcttggctgtgaaagatgctgttaggtgctcatttccattgaggacgaacctcaactgtgctcagagatagctctccatactgataagggatgtag  
gattctcagaaagagagagccgtatgtccccccggaccgcccggatcccagagtgaaatgaaagttagatctacatgggatcactgaatcggccat  
ctatcctcctgaggagaaagttgtttggtttcaactccgattcaaacaggagaggtacgccaatgctaattgtccttggatgatccacatctcgggtcagggcgtgat  
gagcacattgaaactatccatgtgctgagagccctcacgcccaggcacaacgacgcaattatcagggcgcgctcctaccactgagctaaatagcccgtcgcgc  
ggcctcccttgggagcgtgctacgcaaaaagcgaaaaactccatccttcttggacatccccatgccgcccacaccacaggggggggcatggggac  
gtcaaaaagggtatcctatcactatcaactaattgttccgacttagataataagctcatgagcttggcttacttaccctaaacgaaagaagacttccatccaag  
tttagctcagacgtagctgcttcttgggctgaaagcagtgcaaaccaaaataccaataagcataagcattagctcctcgtaaaaggaggtgatccagccgc  
acctccagtagcgtacttcttactgacttccactcagctcgaagcctagccttaggcatccccctcttaccggttaagggtaatgacttcaaacatggccagctcct  
atagtgtagcggcgggtgtacaaaggcccgggaacggattaccgcccgtatggctgaccggcgttactagcgttctcgtcagggcaggttgcagcct  
gcaatccgaactgaggacgggttttggagttagctaccctcgcgagatcgcgaccttggcccctttagcagctgtgtcgtcccagggcataaggggca  
tgatgacttggcctcactcctctctccggcttaaccggcggctgttccaggttcaaacctcatagtgcaactaaacacaggggttgcgctcgttgcgaga  
cttaaccaacaccttacggcagagctgacgacagccatgaccactgtgtccgcttcccaggggcaccctcttccaagaggattcgggcatgtaagc  
cctgtaaggtcttctgcttctcagatgaattaaaccacatgctccaccgctgtgcgggccccgtaactcctttagtttatttctcgaactactccccagggg  
gatactaacgcttagctacagcactgcacgggtcagctgcacagcactagatccatcgtttacggcttaggactactgggtcttaatcccatttctccccta  
gcttctctcagtgctcagtgctggcccagcagagtgcttccgctgtgttcttccgatcctaatgatttaccgctccaccggaatccctctgcccctacc  
gtactccagcttggtagtttccaccgcttccagggttagccctgggattgacggcggacttgaagccacctacagacgctttaccgccaatcattccggat  
aacgcttgcactctgtcttaccgcggtgctggcacagagttagccgatcctattctcagataaccgtcattgttcttccgagaaaagaagttgacgacctg

ggcctccacctccacggcgactgtccgtcaggctttcgcctcattgcggaaaatccccactgctgctcccctgtaggagtctggccggtctcagctcccagtgt  
ggctgatcctcctcgaccagctactgatcctgcttggtaagctfcttcctcaccaactgctaactcagacgcgagcccccttggcggatttctcttttct  
cctcagcctacggggattagcaaccgttccagttgttccctcccaaggcgaggttctacgcttactaccggttccactggaacaccacttcccgttc  
gacttgcattgtaagcatccgccagcgttcatcctgagccagatcgaactctcatgattcatagtgcattactatagcttcttattctgtagacaagcggg  
attcggaaattgttcttcccaagataactgtatcctgcgttcagattattagcctggagttcggccaccagcagtatagcaaccctaccctatcacgtcaatccc  
acaagcctcttaccattcccgttcgacgtggcggggggagtaagcaaaaatgaaaaaactcacattgggttagggataatcaggctcgaactgatgactccac  
cacgtcaaggtgacacttaccgctgagttatccctccctcgtccctcgagaagagaattaacgaatcctaaaggcaagggcgagaaactcaaggccacc  
cttctccgggcttcttccacactattatggatagtaaaatgggaaaaattggattcaattgtcaaccggctctatcgaaaataggattgactatggattcagcc  
atagccatggttcataaaatctgtacgattttccgatcaaacgagcaggtttccatgaagaagatctgttcagcatgttctattcgatactggtagagaagaac  
ccgactcgggtattcttaaaaaagggggaagcagaaccaagtcaagatgatatgggtccctcttcttgcgcaaaagatcttaccatttccgaaggactggg  
gtacatttcttcaatttccattcagagtttctatctgttccacgccttttttgagacctcgaacatgaaatggacaattcttctcttagaacacatacaagaaa  
aaggataatgtagccctcccacttacttctattttatgatttcatagtaataagatcttaccgagacagaatttgaacttctatccttctgcta  
ataggcaaaagattgacctctgtagaagactgattcattcggatgatagggacccaaactggttcatttgaagaagggtgacc  
tctgttctctcatgtgtaaaccttctcgtgagcccccttctcctggccacagaaaaatggaggactggtccgacagttcatcaggaagaa  
actcacagacccgggactgtaactaataagaaatgtactactaactaataataatagaaatagatactagaatagaacgaactaataatagataatcga  
ttgaaagaactgttcttctgtatacttcccgttctattgtaccgctggtcttatgcaatcggatcattatagataatccctcaacacaataggtcattcga  
ggatctcggagactcacaagcagaagccagttagaatggttccattttgaagagtgccctaacgcataagctcacatcaaacctgcaatgttggat  
ccaattcgggattttcttgggaaattcgggaagaattggaatgaaataatagattcacaaggaaggggtctattgatgcaaacgtctacacaggaat  
agggatagaggaaaggggaaaaatcgaatgaaataataagaaataagcaaaaaaaataagtcgaagataagagcccagattccaatgaagaaatg  
gaaactgaaaaaggatcttctgattctcaagaatgagggcaaggggattgataaccgagaagatttcttctattataagacgtgattgatccgcatgttgg  
aaaaagaacattcttcttataatcataatgaaaatgtaactgaaacgtgactcaattgtcttagttagtctcgggacggagtggagaagggcg  
gagactcgaacgaggaaaagatccttcaagaatgaacgaggagccgtatgaggtgaaaatctcatgtacggttctgtagaggacaggaagggtgac  
ttatctgtcactttccatcaacccccaaaaaaccaactctgccttaccgtaaaattgagacagatgaaacctctgatttgaacactgcttataactggt  
ttggccataatfacaagaacattctgtatgtaagagagggaagggttaaggattaccgggtgtgagatacgcattattcagggagccctagatgctgtc  
agtaaaagatcgaacaagggcgttctgtgtgtgattcttcaagactgtatcattgatgatccatgtgaatcgtagaaacatgtgaagtgtatggt  
aaccaataacgaaatttctgaaggggactggagcaggctaccatgagacaaaatcttcttcaaaagattcggacttcttatatgtccaaggta  
atgaaattcttctaggggtttccctacttctgtcgtcacaacaacattcgaatacctcacttttccagaacaggtccgagcaatagcaatgattcga  
ttcttttccattacatttccgaaacctaaggacttggatggtatgaaatcagaggttccgacccagcgggaaaaggagggaacggatactcaat  
taagttagtaaacgtaattccatactgatctcatagatccctatagaattctgtgaaagcgtattcgtgaaagttgtatgtacggcttggaggagatcttccat  
cttctgagatccacctacaataggggtcaaaaagccaaaaaaataagtgattcttttagcccttataaaaagaaaacggattctgaaaccttccacgctc  
acgtcaggtactcgaaaaaaagaaactgcaaaatccgatccaaatcttctgaatcgtatgtaaacatggtgtgaaacgtattatgaaagcggaaaaaacat  
gcttatacaatctctatcagccgtgaaaaagattcaaaaaagacagaaacaaatccactattgttttaccgtaaaccaatcagtagagtaactcccaatag  
taaaaaaagacgtaataaaaaagatcgcagcgggaaagttccgattgaaataggatctaaacaaggaagagcacttgcattcgttggattatagaagat  
aaagcgtccgggtcgaatatggttcaaatgattccgaattagtagatgctcgaaggggggtgggggtccatcgaaaaaaggaaagcactcatagaat  
ggcagaggcaaatagactcttgcacatttctgtaatccatgaacagaacttaggtatgtagacacatgacatcagcaaacatcagcaaacatcagca  
gagaatcggagatatttctcgaacaacaaaaaggaagaaagagaaacagaaatcatgactcaactaacccctcgggggcttcttgaagataaagaa  
agaggaaatcttagaaatagcagaaatggttgcctattcatgggattcgtaaataccttccaaaatcgaacaatcgggactttcggagattggat  
gcagttactaattcatgatctgacagaatgaaaacttattctcgttctacgagaattttatgaaagcgttctatttcttccagggaatttcttccc  
agaatgatcctaatttttggcctaatttcttctgatgatcatttaccctctgatcaaaaagatagaccttggttctatttcttcaacaagtttagtaata  
cgccctattgtccgatggagagaagaaactataattagcttttcggaaatttccaaacgaacaaatcacaacgaatcttcaatttctatttattatgt  
tattcctctatccgtagagatcattgaaatgtacagaatgctataacagatttctgtattcgtatcaacagctacttagggggaatttctgtggtgtaac  
aataactatttctgtagctccagaatgttccagtttatgttcttaccctattgtctgatataccaagagatcaggtctaatgaggtactatgaaatatttact  
gtggggcaagcttcttattctgttctcttggctatattgttctcttgggggggagatcagcttcaagaattgtgaacggtcttataacacaaaatg  
ataactccccaggaaattcaattgccttatacctactgtaggacttgggttcaagcttccagcccttctatcaatgactcctgactctacgaaggagt  
ggttcttgcacaaatcctactctatctctctctgagggttgggttgcacaaactccatagatatcgagaaggaatgctatccccactccgaccaagacag  
aactttfacaagaatttattgtatcttcttcaataacaattaggtgagcagggtcaggaacaacgaatccttcttataacacagatccatttgcaggct  
attacggtagtctcacaagaatcggactaatgactatataactctgaaatcagcgtagatgctacatagtggttctcactcctcagagactcaggtgaa  
aggagcatccgttgcacaaagatcacctaaatgatctctatggctattgggaacgaatcaatcagatggttctatttcaaccttctgacttctctacg  
aaccaagctcgaaggattgaaaaagcagctatcaaccactgatgaaggattcctcgaaggttaaggattagttcttttgaatcatttcaaaaaaga  
atgattcgtctatatacgcgaggaaggtatcaaaaaaaagaaagacaaagttcttctttatcacttaggagccgtcggagatgaaagctcatgcacg  
gttttgcagagagaagaagcaggaatccttcttctgactctgactccccactccagctgttcttcttcttcttcttcttcttcttcttcttcttctt  
gcgaattctcgtatttcttttatttctatcaaacgaatgcatcttcttctgaaatcctagctattcttagcatgatattggggaatcctcttcttactca  
atgaaacgtatcctgcatattcttccataggcgaatcggatgtaattattggaataattgttgagactcaaatgatggatgcaagcatgataacttatgctt  
tctatctccatgaatctaggaaatttctgtcattgtattattgtgtctacgtaccggaactgataacattcgattatgcaggattacacgaaagatcctttt  
ctctctttagccctatgtcttattccctaggagccttctcactagcaggtttctcggaaactctatctattctgtgtggtggagcaagcagccctatttct  
gttcaataggactcctacgagcttcttctatctactattatcaaaaatagcaagttatgactggacgaaccaagaataacccttattgtcgaatata

gaagatcccccttaagatcaacaattccatcgaattgagatgactgtatgtgafagactctactataccaggaatatcaatgaacccattcttgaattgctcagg  
ataccctcttttagctgctaggtctatttcttagtcaagatccctctactaactggaataaaagaattagtagatctgtccgcccaaatgggaatgggcgctagggg  
aatgaactataatcatggaatcgaactcagatcatcagattataagttcattccataccggaccagaccgtgcacattctattatgagaaggggtcattcagcctatgg  
aaataggactctgtttacatagaaatcccacgtccttaccattctatttaggattaggaatagggtgaatcagaccgtctttgacatactatcctatcttatttgggta  
ccatagcaccctttgggcttctattgaatcgaaaattggattgacatcttttattttgatacataaagggtcctacggataatgcaaatcgaagctattgatgct  
tgactcaggcctatagaccgatcgaataactccaagactccacctttgcatatattccatatacacattagatagatcatattcatggaatcgaatcacttcc  
aagatcacattagatagatcatattcatggaatattgacttcaagatgccttgatggtaaatggtagacacgcgagactcaaaatctcgtgctaaagagc  
gtggaggttcgagctcctcaaggcataatcggagaatcgcgattcaatgagcattccccgtagaagattccggaaatcgcgctggcgtctcctctatctct  
gaggtccttaaccacttccctgagaaaaggagacagtaaaagccaaaatagactaaatagacctgaacgatcctaaaaatccctcgaaggagataataataaa  
gaacccaaagcagacggatctactcgaagggtgctttaaagaatccaaaagagggtgctcagaagagatagatgtatccccactctattgctctcgcgtaaaagc  
ctttttttacgcgacaggaaaaagtactacgaatccctttttgttgcgaatccctgtttgatcctttgagcgcacgcccataagtagcgatcaaggaatcgc  
aacgatcccataaccgtgaagagaaaactccagatccagggaagccttatacaaaagggttcgacaaggggttttattctctcgcgaaatcgcgattgagag  
ggatagattcgaaccgaattgcaaaagtaactactatgccagcccaatcatgatctcaccactgtgatttggctctcgcgaaatcgcgattgagag  
atgagaaccatgaaaagcaagatcccgaataaagaacgaaaccgaggaaaccacaagagtgaagactagtagatctcgtctttgtcattctttgctcttttc  
actcaatgattcattcgaatttcccgacaaaaattctatgtctattcatagggcctcgttctaaagtctacaagatctagtcactggaactcgtggttattgacc  
gaaatctttagatggaaattgtctttccaaagtaaaaccccagtatataaagaatgaaaagggtgcttctgtctttctgtggaataagaagccctcgtacttaa  
tgaagggaaaaataggaaattttcattaggtatttgacaaataggatcgcagttcctatagaacatcactaaaataccgatagggctaaagcggaaacgaaaagg  
atfttccctgagatgtaaatgaaaacgattagccccatagcaggtttgggaataagtgatgagcaggaatatacgtcttctgctaaagagatctattaaactata  
atcattagatccttctatcaatgtcaactaggatcataagtaaacggatcccgggttgcctaatcctttgataaccaaggtcattctttgctaaagagaatgatcactat  
aggtcagactcaatagaattggatccattccaatagcgagaattaggattctggatccctctcaatctcttcaattcgaaggatccagagaggttttcatagtc  
ctccgaatattgcatctccgaatatttctgattcattttctatgatattcttctatataaaaattggtattttacgatgtacgatgatccctgttaagcatccatggctga  
atggttaaaagcggcccaactcataattggtaaatttgcgggtcaattctctgctggatgcacgcgaaccggaacgtccataagctattggaactgctctctatccatg  
gaatctcatccatccatccatacaaacgaattggatggtatattcataccataacataagaacaataagaactgaattctatc gatactggaactcagagcatagga  
gggaaagtcgattatggatggaatcaaacgcagattttacgaaaaagcttctgtttattgggaaagaatcaatacttttaattgctgaatcgggattcactaag  
acagaaataaagcattgggtcgaactcttcttgggttaaggtagtagctgtgaatgccatcactaccggaaagggtgaagaatgggcctattctagacat  
acaatgcattacagacgtatgatcattaccctcaaccgggttattctacttctagatagaaaaaactaaaggagaatacttaataatcggcgaacatft  
atacaaacacatcccagcacacgcgaagggaaccatagataggcaagtgaatccaatccacgaataattgatccatgacggcaccggttgggtaaaagg  
tcgtaattccagaggatcattaccgcaaggcatagagggggaggtcataagcgcctataccgtaaaatcatttccgacggaatcaaaagacatactgtaga  
atcgtaacatagaatcaccctaactgaaatgcgtacatttctcctacactatggggatggtgagaaggatattttacatccagaggggctataattggag  
atactattgttctgtacaaaagtctctatcaatgggaaatgcctacctttgagtgcggtttgaactattgatttacgaattggaagtaaccaatagggttacgacg  
aaacctagaatcgaactgatccaattgactacctctacgggatagactcaacaagaaactgttgagtaacggcagcaagtgattgagttcagtagttcctcata  
gaaaattattgactctagatagatgtaaatgggaaagacaaaattgttgaagcagcgcacagaaccggaagcggccctgtttcaaaagagagaggaggggta  
ttcacatttaattgatggtcagagcgaattgaaagtaagcagtggttaattaagacccccgggggaaataggatgtcctcactgtaccataatagtgaag  
atcgacgtaattcatagatcattcgaatgctacatgaaagaacataagccagatgacggaacgggagacctaggatgtagaagatcataacatgagcga  
ttcggcagattggattcctttctatataccatctatggtacttcatcagatcataaagatccatctgctagagatcgtatatacatctagaaaagcgtatg  
ctttggaagaagctgtacagtttgggaggggtttttgagagaaaagaagaatctactcaaccgataatcccttaggcacggccatacaatagaaatcaca  
cgtggaaggggtgggcaattagctagagcagcaggtgctgtagcgaactgattgcaaaagaaggtaaatcggccacttaagattaccatctggggaggtccgt  
ttggtatcccaaaactgcttagcaacagtcggacaagtgggtaattgttgggtgaacaaaaagttgggtagagccgggtcctaaagtgttgctaggtaaagcc  
ccgtagtaagaggggtagttatgaaccctgtggaccacccccatggggggcgtgaaagggaaagccccattgtagaaaaaaaccacaacccttggggttat  
cctgccttggaaagaactagaaaaagaaaaaataatgtgatagtttattctctcgtcgcgtaagtaaatcgtactaggaatggaatgcaattttggaa  
tttgcataatgggatgggcaacgacgggaattgaaccgcgcatgtgtgattcaaatccactgccttgatccacttggctacatccgcccttaccagctaaa  
ggtatttctcttttccattcattattctatttctgacctccatactcgtcagatattggacatcgaatgcaactttaaattggaaaaaaggagtaatcagc  
tgtgacacgaaaaaaacgaatccctttgtagctcatttatttggcaaaaatagaaaaggtcaatagaggaggaagaaacaatagtaacgtgggtccggg  
catctagcatttaccgcaatggttggccatacaatcgcgattcataatggaaggaacatatacctatttatacaaaaatccatgtaggtcgaattggggg  
atcgtaccaactcggcatttcagagttatgaaagtcaagaaaggatactaaatctcgtcgttaactgaattcagaatagaagattcaaaataaaaaaaagaa  
ata

## Supplementary Dataset S2.

The 45S transcription unit sequences of seven *Oryza* species. WGS sequences of these seven accessions were retrieved from GenBank (Table 1) and the 45S sequence was obtained using the dnaLCW method. The header of each FASTA sequence indicates species name and accession number.

>O.rufipogon\_AC11-1008369\_45S

```
ACCTGGTTGATCCTGCCAGTAGTCATATGCTTGTCTCAAAGATTAAGCCATGCATGTGCAAGTATGAA
CTAATTCGAACTGTGAAACTGCGAATGGCTCATTAATCAGTTATAGTTTGTGGTACGTGCTA
CTCGGATAACCGTAGTAATTCTAGAGCTAATACGTGCAACAAACCCCGACTTCCGGGAGGGGCGCAT
TTATTAGATAAAAGGCTGACGTGGGCTCTGCCCGCTGATCCGATGATTCATGATAACTCGACGGATCG
CACGGCCCTCGTGCCGGCGACGCATTCATAAATTTCTGCCCTATCAACTTTCGATGGTAGGATAGG
GGCCTACCATGGTGGTGACGGGTGACGGAGAATTAGGGTTCGATTCCGGAGAGGGAGCCTGAGAA
ACGGCTACCACATCCAAGGAAGGCAGCAGGCGCGCAAATTACCCAATCCTGACACGGGGAGGTTAG
TGACAATAAATAACAATACCGGGCGCTTTAGTGTCTGGTAATTGGAATGAGTACAATCTAAATCCCTT
AACGAGGATCCATTGGAGGGCAAGTCTGGTGCCAGCAGCCGCGTAATCCAGCTCCAATAGCGTA
TATTTAAGTTGTTGCAGTTAAAAAGCTCGTAGTTGGACCTTGGGCCGGTCCGGCCCGTCCGCCTCAC
GGCGAGCACCGACCTACTCGACCCTTCTGCCGGCGATGCGCTCCTGGCCTTAACTGGCCGGTTCGT
GCCTCCGGCGCCGTTACTTTGAAGAAATTAGAGTGCTCAAAGCAAGCCATCGCTCTGGATACATTAG
CATGGGATAACATCATAGGATTCCGGTCTATTGTGTTGGCCTTCGGGATCGGAGTAATGATTAATAG
GGACAGTCGGGGGCATTCGTATTTTCATAGTCAGAGGTGAAATTTCTGGATTTATGAAAGACGAACAA
CTGCGAAAGCATTTGCCAAGGATGTTTTCAATTAATCAAGAACGAAAGTTGGGGGCTCGAAGACGAT
CAGATACCGTCTAGTCTCAACCATAAACGATGCCGACCAGGGATCGGCGGATGTTGCTTATAGGAC
TCCGCCGGCACCTTATGAGAAATCAAAGTCTTTGGGTTCCGGGGGGAGTATGGTTCGCAAGGCTGAA
ACTTAAAGGAATTGACGGAAGGGCACACCAGGCGTGGAGCCTGCGGCTTAATTTGACTCAACACG
GGGAAACTTACCAGGTCCAGACATAGCAAGGATTGACAGACTGAGAGCTCTTTCTTGATTCTATGGG
TGGTGGTGCATGGCCGTTCTTAGTTGGTGGAGCGATTTGTCTGGTTAATCCGTTAACGAACGAGAC
CTCAGCCTGCTAACTAGCTATGCGGAGCCATCCCTCCGCAGCTAGCTTCTTAGAGGGACTATGGCCG
TTTAGGCCACGGAAGTTTGAGGCAATAACAGGTCTGTGATGCCCTTAGATGTTCTGGGCCGCACGCG
CGCTACACTGATGATTTCAACGAGTATATAGCCTTGGCCGACAGGCCCGGGTAATCTTGGGAAATTC
ATCGTGATGGGGATAGATCATTGCAATTGTTGGTCTTCAACGAGGAATGCCTAGTAAGCGCGAGTCA
TCAGCTCGCGTTGACTACGTCCCTGCCCTTGTACACACCCGCCCGTCGCTCCTACCGATTGAATGGT
CCGGTGAAGTGTTCCGATCGCGGGCAGCGGGGGCGGTTCCGCCGCCCCCGACGTCGCGAGAAGTCCA
TTGAACCTTATCATTTAGAGGAAGGAGAAGTTCGTAACAAGGTTTCCGTAGGTGAACCTGCGGAAGG
ATCATTGTGCTGACCCTGACCAAAACAGACCGCGAACGCGTCACCCCTGCCCGCCGAGCGCTCGCG
CGCGAGGCAACCGAGGCCCCCGGGCCGCAACAGAACCACGGCGCCGACGGCGTCAAGGAACAC
AGCGATACGCCCGCGCCGCGCCGGTCCGGCCCTGGCCGTCCGGCGGCGCGGCGGATAACCACGAGTTA
AATCCACGACTCTCGGCAATGGATATCTCGGCTCTCGCATCGATGAAGAACGTAGCGAATGCGA
TACCTGGTGTGAATTGCAGAATCCCGTGAACCATCGACTCTTTGAACGCAAGTTGCGCCCGAGGCT
ATCCGGCCGAGGGCACGCTGCCTGGGCGTACGCGCAAAAGACGCTCCACGCGCCCCCCTATCCG
GGAGGGCGCGGGGACGCGGTGTCTGGCCTCCCGCCTCGCGGCGCGGTGGGCCGAAGCTCGGGC
TGCCGGCGAAGCGTGCCGGGCACAGCGCATGGTGGACAGCTCACGCTGGCTCTAGGCCGCAGTGC
ACCCCGGCGCGCGGCCGGCGCGATGGCCCTCAGGACCCAAACGCACCGAGAGCGAACGCCTCGG
ACCGCGACCCAGGTCAGGCGGGACTACCCGCTGAGTTTAAAGCATATAAATAAGCGGAGGAGAAGA
AACTTACGAGGATCCCTAGTAACGGCGAGCGAACCGGGAGATGCCAGCTTGAGAATCGGGCGG
CCGCGCCCGCCGAATTGTAGTCTGGAGAGGCGTCTCAGCGACGGACCGGGCCCAAGTCCCCTGG
AAAGGGGCGCCTGGGAGGGTGAGAGCCCCGTCCGGCCCCGACCCTGTGCCCCACGAGGCGCCGT
CAACGAGTCGGGTTGTTTGGGAATGCAGCCAAATCGGGCGGTAAACTCCGTCCAAGGCTAAATAC
AGGCGAGAGACCGATAGCGAACAAGTACCGCGAGGGAAAGATGAAAAGGACTTTGAAAAGAGAG
TCAAAGAGTGCTTGAAATTGCCGGGAGGGAAAGCGGATGGGGGCGGCGATGCGCCCCGGCCGTAT
GCGGAACGGCTTCGGTGGTCCGCCGATCGGCTCGGGCGTGGACTGTTGTGCGGCCGCGCCGGCG
GCCAAAGCCCCGGGGGCTCCGCGCCCCCGGCAGCCGCCGTCCGGCGCAGCCGGTACCGCGCGCCTC
TGGCGCGCCCCCTCGGGGCGCTGCGCTGCAACGGCCTGCGGGCTCCCATCCGACCCGTCTTGAAAC
ACGGACCAAGGAGTCTGACATGCGTGGGAGTCGACGGGTTCTGAAACCTGGGATGCGCAAGGAAG
CTGACGAGCGGGAGGCCCTCACGGGCCGACCGCTGGCCGACCCTGATCTTCTGTGAAGGGTTCGA
GTTGGAGCACGCCTGTCTGGGACCCGAAAGATGGTGAACCTATGCCTGAGCGGGGGCGAAGCCAGAGG
```

AAACTCTGGTGGAGGCTCGAAGCGATACTGACGTGCAAATCGTTCGTCTGACTTGGGTATAGGGGC  
GAAAGACTAATCGAACCATCTAGTAGCTGGTTCCTCCGAAGTTTCCCTCAGGATAGCTGGAGCCCA  
TTACGAGTTCTATCGGGTAAAGCCAATGATTAGAGGCATCGGGGGCGCAACGCCCTCGACCTATTCT  
CAAACCTTTAAATAGGTAGGACGGCGCGGCTGCTCCGGTGAGCCGCGCCACGGAATCGGGAGCTCCA  
AGTGGGCCATTTTTGGTAAGCAGAAGTGGCGATGCGGGATGAACCGGAAGCCTGGTTACGGTGCCG  
AACTGCGCGCTAACCTAGAACCCACAAAGGGTGTGGTTCGATTAAGACAGCAGGACGGTGGTCATG  
GAAGTCGAAATCCGCTAAGGAGTGTGTAACAACCTCACCTGCCGAATCAACTAGCCCCGAAAATGGA  
TGGCGCTGAAGCGCGCGACCCACACCAGGCCATCTGGGGCGAGCGCCATGCCCCGATGAGTAGGAG  
GGCGCGGGCGGCCCGCAAAACCCGGGGCGGAGCCGGGGCGGAGCGGCCGTGGTGCAGATCTT  
GGTGGTAGTAGCAAATATTCAAATGAGAACTTTGAAGGCCGAAGAGGAGAAAGGTTCCATGTGAAC  
GGCACTTGCACATGGGTAAAGCCGATCCTAAGGGACGGGGTAACCCCGGCAGAGAGCGCGACCACG  
CGCGTGCCCCGAAAGGGAATCGGGTAAAGATTTCCCGAGCCGGGACGTGGCGGTTGACGGCGACG  
TTAGGAAGTCCGGAGACGCCGGCGGGGGCCTCGGGAAGAGTTATCTTTTCTGCTTAACGGCCCCGCC  
AACCCCTGAAACGGTTCAGCCGGAGGTAGGGTCCAGCGGCCGGAAGAGCACCGCACGTGCGCGCG  
TGTCCGGTGGCCCCCGGGCGGCCCTTGAAAATCCGGAGGACCGAGTACCGTCCACGCCCAAGTCGTA  
CTCATAACCGCATAGTCTCCAAGGTGAACAGCCCTCTGGCCAATGGAACAATGTAGGCAAGGGAA  
GTCCGCAAAAACGGATCCGTAACCTTCGGGAAAAGGATTGGCTCTGAGGGCTGGGTCGGGGTCC  
GGCCCCGAACCCGTGGCTGCCGGCGGACTGCTCGAGCTGCTCGCGCGGCGAGAGCGGGCCCGCCG  
CGTGCCGGCCGGGGACGGACCGGGAACGGCCCCCTCGGGGGCCTTCCCCGGGCGTGAACAGCC  
GACTCAGAACTGGTACGGACAAGGGGAATCCGACTGTTAATTA AAAACAAAGCATTGCGATGGTCC  
TCGCGGATGCTGACGCAATGTGATTTCTGCCAGTGCTCTGAATGTCAAAGTGAAGAAATTCAACCA  
AGCGCGGGTAAACGGCGGGAGTAACTATGACTCTCTTAAGGTAGCCAAATGCCTCGTCATCTAATTA  
GTGACGCGCATGAATGGATTAACGAGATTCCCCTGTCCCTGTCTACTATCCAGCGAAACCACAGCC  
AAGGGAACGGCTTGGCGGAATCAGCGGGGAAAGAAGACCCTGTTGAGCTTGACTCTAGTCCGAC  
TTTTGTAAATGACTTGAGAGGTGTAGGATAAGTGGGAGCCCTCGGGCGCAAGTGAATACCCTAC  
TTTTAACGTTATTTTACTTATTCCGTGAGTCGGAAGCGGGCCTGGCCCCCTCTTTTGGCTCTAAGGC  
CCGAGTCCCTCGGGCCGATCCGGGCGGAAGACATTGTCAGGTGGGGAGTTTGGCTGGGGCGGCAC  
ATCTGTAAAAGATAACGCAGGTGTCTAAGATGAGCTCAACGAGAACAGAAATCTCGTGTGGAAC  
AAAAGGGTAAAAGCTCGTTTGATTCTGATTTCCAGTACGAATACGAACCGTGAAAGCGTGGCCTATC  
GATCCTTTAGACCTTCGGAGTTTGAAGCTAGAGGTGTCAGAAAAGTTACCACAGGGATAACTGGCT  
TGTGGCAGCCAAGCGTTCATAGCGACGTTGCTTTTTGATCCTTCGATGTCCGGCTCTTCCTATCATTGT  
GAAGCAGAAATCACCAAGTGTGGATTGTTACCCACCAATAGGGAACGTGAGCTGGGTTTAGACC  
GTCGTGAGACAGGTTAGTTTTACCCTACTGATGACCGTGCCGCGATAGTAATTCAACCTAGTACGAG  
AGGAACCGTTGATTCACACAATTGGTCATCGCGCTTGGTTGAAAAGCCAGTGGCGCGAAGCTACCG  
TGTGCCGATTATGACTGAACGCCTCTAAGTCAGAATCCAAGCTAGCAAGCGGCGCCTGCGCCCCG  
CGCCCGCCCCGACCCACGTTAGGGGGCGCAAGCCCCAAGGGCCCCGTGCCACCGGCCAAGCCGGCC  
CGGCCGACGCGCCGCGGCCGGCCGCTCGAAGCTCCCTTCCCAACGGGCGGCGGGCTGAATCCTTT  
GCAGACGACTTAAATACGCGACGGGCGATTGTAAGTGGCAGAGTGGCCTTGTGCCACGATCCACT  
GAGATCCAGCCCCGCTGCGACGGATTCTGCTCCCTCCCCCTCTCCCCCGCCCGCCGAGGTGCC  
CCCCGAGCCCCCGCTCCGGCCAAGTCCCCAGGCCCTCTAAGTCCGCGCGCTGGTGGGGAGG  
CACGAAGGGAAAACGCGCTCGCCAAGTCCCAAGAGCCACCGGGCAGACTCCAAGGACGGGACGA  
CGGGCGGTTGACGGCGCCATGCCACCAAGCCTCCAAGCGTGCCGCGCACGGAACCCGCCAA  
GGTCTGAGCACGTACCGCGCGAGAGACCCGCACCACGCCGGGTTCCGGTCCACGTCCGCTCGCCC  
CAGTCCCGAGC

>O.rufipogon\_AC01-1002323\_45S

ACCTGGTTGATCCTGCCAGTAGTCATATGCTTGTCTCAAAGATTAAGCCATGCATGTGCAAGTATGAA  
CTAATTTGAACTGTGAAACTGCGAATGGCTCATTAAATCAGTTATAGTTTGGTTGATGGTACGTGCTA  
CTCGGATAACCGTAGTAATTCTAGAGCTAATACGTGCAACAAACCCCGACTTCCGGGAGGGGCGCAT  
TTATTAGATAAAAGGCTGACGCGGGCTCTGCCCGCTGATCCGATGATTCATGATAACTCGACGGATCG  
CACGGCCCTCGTGCCGGCGACGCATATTCAAATTTCTGCCCTATCAACTTTCGATGGTAGGATAGG  
GGCCTACCATGGTGGTACGGGTGACGGAGAATTAGGGTTCGATTCCGGAGAGGGAGCCTGAGAA  
ACGGCTACCACATCCAAGGAAGGCAGCAGGCGCGCAAATTACCAATCCTGACACGGGGAGGTAG  
TGACAATAAATAACAATACCGGGCGCTTTAGTGTCTGGTAATTGGAATGAGTACAATCTAAATCCCTT  
AACGAGGATCCATTGGAGGGCAAGTCTGGTGCCAGCAGCCGCGTAATTCCAGCTCCAATAGCGTA  
TATTTAAGTTGTTGCAGTTAAAAAGCTCGTAGTTGGACCTTGGGCCGGGTCCGGCCGTCCGCCTCAC  
GGCGAGCACCGACCTACTCGACCCTTCTGCCGGCGATGCGCTCCTGGCCTTAACTGGCCGGGTTCGT

GCCTCCGGCGCCGTTACTTTGAAGAAATTAGAGTGCTCAAAGCAAGCCATCGCTCTGGATACATTAG  
CATGGGATAACATCATAGGATTCCGGTCTATTGTGTTGGCCTTCGGGATCGGAGTAATGATTAATAG  
GGACAGTCGGGGGCATTCGTATTTTCATAGTCAGAGGTGAAATTTCTTGGATTTATGAAAGACGAACAA  
CTGCGAAAGCATTGCCAAGGATGTTTTTCATTAATCAAGAACGAAAGTTGGGGGCTCGAAGACGAT  
CAGATACCGTCTAGTCTCAACCATAAACGATGCCGACCAGGGATCGGCGGATGTTGCTTATAGGAC  
TCCGCCGGCACCTTATGAGAAATCAAAGTCTTTGGGTTCCGGGGGGAGTATGGTTCGCAAGGCTGAA  
ACTTAAAGGAATTGACGGAAGGGCACACCAGGCGTGGAGCCTGCGGCTTAATTTGACTCAACACG  
GGAAACTTACCAGGTCCAGACATAGCAAGGATTGACAGACTGAGAGCTCTTTCTTGATTCTATGGG  
TGGTGGTGCATGGCCGTTCTTAGTTGGTGGAGCGATTTGTCTGGTTAATTCGGTTAACGAACGAGAC  
CTCAGCCTGCTAACTAGCTATGCGGAGCCATCCCTCCGCAGCTAGCTTCTTAGAGGGACTATGGCCG  
TTTAGGCCACGGAAGTTTGAGGCAATAACAGGTCTGTGATGCCCTTAGATGTTCTGGGCCGCACGCG  
CGCTACACTGATGATTCAACGAGTATATAGCCTTGGCCGACAGGCCCGGGTAATCTTGGGAAATTT  
ATCGTGATGGGGATAGATCATTGCAATTGTTGGTCTTCAACGAGGAATGCCTAGTAAGCGCGAGTCA  
TCAGCTCGCGTTGACTACGTCCCTGCCCTTGTACACACCGCCCGTCCGCTCCTACCGATTGAATGGT  
CCGGTGAAGTGTTCGGATCGCGGCGACGGGGCGGTTTCGCCGCCCGGACGTCGCGAGAAGTCCA  
TTGAACCTTATCATTAGAGGAAGGAGAAGTCTGTAACAAGGTTTCCGTAGGTGAACCTGCGGAAGG  
ATCATTGTCTGACCCTGACCAAAACAGACCGCGAACGCGTCAACCCCTGCCCGCCGAGCGCTCGCG  
CGCGAGGCAACCGAGGCCCGCCCGGCCGCAACAGAACCACGGCGCCGACGGCGTCAAGGAACAC  
AGCGATACGCCCGCGCCGCCCGGTCGGCCCTGGCCGTCGGCGCGCGCGGCGGATACCACGAGTTA  
ATCCACACGACTCTCGGCAACGGATATCTCGGCTCTCGCATCGATGAAGAACGTAGCGAAATGCGAT  
ACCTGGTGTGAATTGCAGAATCCCGTGAACCATCGAGTCTTTGAACGCAAGTTGCGCCCGAGGCCA  
TCCGGCCGAGGGCACGCCTGCCTGGGCGTCACGCCAAAAGACGCTCCACGCGCCCCCTATCCGG  
GAGGGCGCGGGGACGCGGTGTCTGGCCTCCCGCGCCTCGCGGCGCGGGCCGAAGCTCGGGCT  
GCCGGCGAAGCGTGCCGGGCACAGCGCATGGTGGACAGCTCACGCTGGCTCTAGGCCGACAGTGCA  
CCCCGGCGCGCGGCCGGCGCGATGGCCCTCAGGACCAACGCACCGAGAGCGAACGCCTCGGA  
CCGCGACCTAGGTACGGCGGGACTACCCGCTGAGTTAAGCATATAAATAAGCGGAGGAGAAGAA  
ACTTACGAGGATTCCCCTAGTAACGGCGAGCGAACCGGGAGATGCCAGCTTGAGAATCGGGCGCG  
CGCGCCGTCGAATTGTAGTCTGGAGAGGCGTCCCTCAGCGACGGACCGGGCCCAAGTCCCCTGGA  
AAGGGGCGCCTGGGAGGGTGAAGAGCCCCGTCGGGCCCGGACCCTGTCCGCCACGAGGCGCCGTC  
AACGAGTCGGGTTGTTGGGAATGCAGCCCAAATCGGGCGGTAAACTCCGTCCAAGGCTAAATACA  
GGCGAGAGACCGATAGCGAACAAAGTACCAGCGAGGGAAAGATGAAAAGGACTTTGAAAAGAGAGT  
CAAAGAGTGCTTGAATTTGCCGGGAGGGAAGCGGATGGGGGCCGGCGATGCGCCCCGGCCGTATG  
CGGAACGGCTCCGGCTGGTCCGCCGATCGGCTCGGGGCGTGGACTGTTGTGCGCCGCGCCGGCGG  
CCAAAGCCCCGGGGGCTCCGCGCCCCCGGCAGCCGTCGTCCGGCGCAGCCGGTCAACGCGCGCCTCT  
GGCGCGCCCCCTCGGGGCGCTGCGCTGCAACGGCCTGCGGGCTCCCCATCCGACCCGTCTTGAACA  
CGGACCAAGGAGTCTGACATGCGTGCAGTTCGACGGGTTCTGAAACCTGGGATGCGCAAGGAAGC  
TGACGAGCGGGAGGCCCTCACGGGCCGACCCGCTGGCCGACCCTGATCTTCTGTGAAGGGTTCGA  
GTTGGAGCACGCCTGTCGGGACCCGAAAGATGATGAACTATGCCTGAGCGGGGCGAAGCCAGAGG  
AAACTCTGGTGGAGGCTCGAAGCGATACTGACGTGCAAACTCGTTCGTTGACTTGGGTATAGGGG  
GAAAGACTAATCGAACCATCTAGTAGTCTGGTTCCCTCCGAAGTTTCCCTCAGGATAGCTGGAGCCCA  
TTACGAGTTCTATCGGGTAAAGCCAATGATTAGAGGCATCGGGGCGCAACGCCCTCGACCTATTCT  
CAAACCTTAAATAGGTAGGACGGCGCGGCTGCTCCGGTGAGCCGCGCCACGGAATCGGGAGCTCCA  
AGTGGGCCATTTTTGGTAAGCAGAACTGGCGATGCGGGATGAACCGGAAGCCTGGTTACGGTGCCG  
AACTGCGCGCTAACCTAGAACCACAAAGGGTGTGGTTCGATTAAGACAGCAGGACGGTGGTCATG  
GAAGTCGAAATCCGCTAAGGAGTGTGTAACAACCTACCTGCCGAATCAACTAGCCCCGAAAATGGA  
TGGCGCTGAAGCGCGCGACCCACACCAGGCCATCTGGGCGAGCGCCATGCCCCGATGAGTAGGAG  
GGCGCGGGCGCCCGCCGAAAACCCGGGGCGCGAGCCGGGCGGAGCGGCCGTCGGTGCAGATCTT  
GGTGGTAGTAGCAAATATTCAAATGAGAACTTTGAAGGCCGAAGAGGAGAAAGGTTCCATGTGAAC  
GGCACTTGCACATGGGTAAGCCGATCCTAAGGGACGGGGTAACCCCGGCAGAGAGCGCGACCACG  
CGGTGCCCCGAAAGGGAATCGGGTTAAGATTTCCCGAGCCGGGACGTGGCGGTTGACGGCGACG  
TTAGGAAGTCCGGAGACGCCGGCGGGGCTCGGGAAGAGTTATCTTTTCTGCTTAACGGCCCCG  
AACCTGGAACGGCTCAGCCGAGGTAGGGTCCAGCGGCCGGAAGAGCACCGCACGTCCGCGG  
GTGTCCGGTGCGCCCCCGCGGCCCTTGAAAATCCGGAGGACCGAGTACCGTCCACGCCCGGTCT  
ACTATAACCGCATCAGGTCTCCAAGGTGAACAGCCTCTGGCCAATGGAACAATGTAGGCAAGGGA  
AGTCGGCAAAACGGATCCGTAACCTCGGGAAAAGGATTGGCTCTGAGGGCTGGGCTCGGGGGTCC  
CGGCCCGAACCCGTCGGCTGCCGGCGGACTGCTCGAGCTGCTCGCGGGCGAGAGCGGGCCGCC

CGGTGCCGCGCGGGGACGGACCGGGAACGGCCCCCTCGGGGGCCTTCCCCGGGCGTCGAACAGC  
CGACTCAGAAGTGGTACGGACAAGGGGAATCCGACTGTTTAATTAACAAAGCATTGCGATGGTC  
CTCGCGGATGCTGACGCAATGTGATTTCTGCCAGTGCTCTGAATGTCAAAGTGAAGAAATCAACC  
AAGCGCGGTAAACGGCGGGAGTAACTATGACTCTCTTAAGGTAGCCAAATGCCTCGTCATCTAATT  
AGTGACGCGCATGAATGGATTAACGAGATTCCCACTGTCCCTGTCTACTATCCAGCGAAACCACAGC  
CAAGGGAACGGGCTTGGCGGAATCAGCGGGGAAAGAAGACCCCTGTTGAGCTTGACTCTAGTCCGA  
CTTTGTGAAATGACTTGAGAGGTGTAGGATAAGTGGGAGCCCTCGGGCGCAAGTGAAATACCACTA  
CTTTTAACGTTATTTTACTTATTCCGTGAGTCGGAAGCGGGGCCTGGCCCTCCTTTTGGCTCTAAGG  
CCCGAGTCCCTCGGGCCGATCCGGGCGGAAGACATTGTCAGGTGGGGAGTTTGGCTGGGGCGGCA  
CATCTGTTAAAAGATAACGCAGGTGTCTAAGATGAGCTCAACGAGAACAGAAATCTCGTGTGGAA  
CAAAAGGGTAAAAGCTCGTTTGTATTCTGATTTCCAGTACGAATACGAACCGTGAAAGCGTGGCCTAT  
CGATCCTTTAGACCTTCGGAGTTTGAAGCTAGAGGTGTGAGAAAAGTTACCACAGGGATAACTGGC  
TTGTGGCAGCCAAGCGTTCATAGCGACGTTGCTTTTTGATCCTTCGATGTCGGCTCTTCCTATCATTG  
TGAAGCAGAATCACCAAGTGTGGATTGTTACCCACCAATAGGGAACGTGAGCTGGGTTTAGAC  
CGTCGTGAGACAGGTTAGTTTTACCCTACTGATGACCGTGCCGCGATAGTAATCAACCTAGTACGA  
GAGGAACCGTTGATTACACAATTGGTCAATCGCGATTGGTTGAAAAGCCAGTGGCGCGAAGTACC  
GTGTGCCGATTATGACTGAACGCCTTAAGTCAAGTCAAGCTAGCAAGCGGCGCCTGCGCCCG  
CCGCCCGCCCCGACCCACGTTAGGGGCGCAAGCCCCAAGGGCCCGTGCCACCGGCAAGCCGGC  
CCGGCCGACGCGCCGCGGCCGGCCGCTCGAAGCTCCCTTCCCAACGGGCGGGCGGGCTGAATCCTT  
TGCAGACGACTTAAATACGCGACGGGGCATTGTAAGTGGCAGAGTGGCCTTGTGCCACGATCCAC  
TGAGATCCAGCCCCGCGTGCACGGATTCTGTCCTCCCCCTCTCCCCCGCGCCCCGCGCAGGTTCC  
C

>O.nivara\_IRGC8812\_45S

ACCTGGTTGATCTGCCAGTAGTCATATGCTTGTCTCAAAGATTAAGCCATGCATGTGCAAGTATGAA  
CTAATTCGAAGTGTGAAACTGCGAATGGCTCATTAAATCAGTTATAGTTTGTGGTACGTGCTA  
CTCGGATAACCGTAGTAATTCTAGAGCTAATACGTGCAACAAACCCCGACTTCCGGGAGGGGCGCAT  
TTATTAGATAAAAGGCTGACGCGGGCTCCGCCGCTGATCCGATGATTCATGATAACTCGACGGATC  
GCACGGCCCTCGTGCCGCGACGCATCATTCAAATTTCTGCCCTATCAACTTTCGATGGTAGGATAG  
GGCCTACCATGGTGGTGACGGGTGACGGAGAATTAGGGTTCGATTCCGGAGAGGGAGCCTGAGA  
AACGGCTACCACATCCAAGGAAGGCAGCAGGCGCGCAAATTACCAATCCTGACACGGGGAGGTA  
GTGACAATAATAACAATACCGGGCGCTTGTAGTGTGGTAATTGGAATGAGTACAATCTAAATCCCT  
TAACGAGGATCCATTGGAGGGCAAGTCTGGTGCCAGCAGCCGCGGTAATTCCAGCTCCAATAGCGT  
ATATTTAAGTTGTTGCAGTTAAAAGCTCGTAGTTGGACCTTGGGCCGGGCGGCCGGTCCGCCTCA  
CGGCGAGCACCGACCTGCTCGACCCTTCTGCCGCGATGCGCTCCTGGCCTTAACTGGCCGGGTGCG  
TGCTCCGGCGCCGTTACTTTGAAGAAATTAGAGTGCTCAAAGCAAGCCATCGCTCTGGATACATTA  
GCATGGGATAACATCATAGGATTCGGTCTTATTGTGTTGGCCTTCGGGATCGGAGTAATGATTAATA  
GGGACAGTCGGGGGCAATTCGATTTTCATAGTCAGAGGTGAAATCTTGGATTTATGAAAGACGAACA  
ACTGCGAAAGCATTTCGCAAGGATGTTTTTCAATTAACAAGAACGAAAGTTGGGGGCTCGAAGACGA  
TCAGATAACCGTCTAGTCTCAACCATAAACGATGCCGACAGGATCGGCGGATGTTGCTTATAGGA  
CTCCGCCGCGACCTTATGAGAAATCAAAGTCTTTGGGTTCCGGGGGAGTATGGTCGCAAGGCTGA  
AACTTAAAGGAATTGACGGAAGGGCACCAAGGCGTGGAGCCTGCGGCTTAATTTGACTCAACAC  
GGGAAACTTACCAGGTCCAGACATAGCAAGGATTGACAGACTGAGAGCTCTTTCTTGATTCTATGG  
GTGGTGGTGCATGGCCGTTCTTAGTTGGTGGAGCGATTTGTCTGGTTAATTCCGTTAACGAACGAGA  
CCTCAGCCTGCTAACTAGCTATGCGGAGCCATCCCTCCGAGCTAGCTTCTTAGAGGGACTATGGCC  
GTTTAGGCCACGGAAGTTTGAAGCAATAACAGGTCTGTGATGCCCTTAGATGTTCTGGGCCGACGCG  
GCGCTACACTGATGTATTCAACGAGTATATAGCCTTGGCCGACAGGCCCGGGTAATCTTGGGAAATT  
TCATCGTGATGGGGATAGATCATTGCAATTGTTGGTCTTCAACGAGGAATGCCTAGTAAGCGCGAGT  
CATCAGCTCGCGTTGACTACGTCCCTGCCCTTTGTACACACCGCCCGTCGCTCCTACCGATTGAATG  
GTCCGGTGAAGTGTTCGGATCGCGGCGACGGGGCGGTTCCGCCCCCCGACGTCGCGAGAAGTC  
CATTGAACCTTATCATTAGAGGAAGGAGAAGTCGTAACAAGGTTTCCGTAGGTGAACCTGCGGAA  
GGATCATTGTGCTGACCCTGACCAAAACAGACCGCGAACGCGTCACCCCTGCCCGCCGAGCGCTCG  
CGCGGAGGCAACCGAGGCCCCCCGGGCCGCAACAGAACCCACGGCGCCGACGGCGTCAAGGAAC  
ACAGCGATACGCCCCGCGCTGGCCCCGGTCCGCCCTGGCCGTCCGGCGGGCGGGCGGATACCACGA  
GCTAAATCCACACGACTCTCGGCAACGGATATCTCGGCTCTCGCATCGATGAAGAACGTAGCGAAAT  
GCGATACCTGGTGTGAATTGCAGAATCCCGTGAACCATCGAGTCTTTGAACGCAAGTTGCGCCCCGA  
GGCCATCCGGCCGAGGGCACGCCTGCCTGGGCGTCACGCCAAAAGACGCTCCACGCGCCCCCT

ATCCGGGAGGGCGCGGGGACGCGGTGTCTGGCCCCCGCGCCTCGCGGCGCGGTGGGCCGAAGCT  
CGGGCTGCCGGCGAAGCGTGCCGGGCACAGCGCATGGTGGACAGCTCACGCTGGCTCTAGGCCGC  
AGTGCACCCCGGCGCGCGGGCCGGCGCGATGGCCCTCAGGACCCAAACGCACCGAGAGCGAACGC  
CTCGGACCGCGACCCCAAGTTCAGGCGGGACTACCCGCTGAGTTTAAGCATATAAATAAGCGGAGGA  
GAAGAACTTACGAGGATCCCTAGTAACGGCGAGCGAACCCGGGAGATGCCAGCTTGAGAATCG  
GGCGGCCGCGCCGTCCGAATTGTAGTCTGGAGAGGGCTCCTCAGCGACGGACCGGGCCCAAGTCC  
CCTGGAAAGGGGCGCCTGGGAGGGTGAGAGCCCCGTCCGGCCCCGACCCCTGTCCGCCACGAGGC  
GCCGTCAACGAGTCCGGTTGTTTGGGAATGCAGCCAAATCGGGCGGTAAACTCCGTCCAAGGCTA  
AATACAGGCGAGAGACCGATAGCGAACAAAGTACCGCGAGGGAAAGATGAAAAGGACTTTGAAAAG  
AGAGTCAAAGAGTGCTTGAATTTGCCGGGAGGGAAGCGGATGGGGGCCGGCGATGCGCCCCGGCC  
GTATGCGAACGGCTTCGGCTGGTCCGCCGATCGGCTCGGGGCGTGGACTGTTGTCCGCCGCGCTG  
GCGGCCAAAGCCCGGGGGCTCCGCGCCCCCGGCAGCCGTCGTCCGGCGACCCGGTACCCGCGCGC  
CTCTGGCGCGCCCCTCGGGGCGCCGCGCTGCAACGGCCTGCGGGCTCCCCATCCGACCCGTCTTGA  
AACACGGACCAAGGAGTCTGACATGCGTGCGAGTCGACGGTTCTGAAACCTGGGATGCGCAAGG  
AAGTCGAGCGGAGCGGAGCCCTCACGGGCCCGACCCGTCGGCCGACCCCTGATCTTCTGTGAAGGGT  
TCGAGTTGGAGCAGCCTGTCCGGACCCGAAAGATGGTGAACCTGACCTGAGCGGGGCGAAGCCA  
GAGAAACTCTGGTGGAGGCTCGAAGCGATACTGACGTGCAAATCGTTTCGTCTGACTTGGGTATAG  
GGGCGAAAGACTAATCGAACCATCTAGTAGCTGGTTCCCTCCGAAGTTCCCTCAGGATAGCTGGAG  
CCCATTACGAGTTCTATCGGGTAAAGCCAATGATTAGAGGCATCGGGGGCGCAACGCCCTCGACCTA  
TTCTCAAACCTTTAAATAGGTAGGACGGCGCGGCTGCTCCGGTGAGCCGCGCCACGGAATCGGGAGC  
TCCAAGTGGGCCATTTTTGGTAAGCAGAACTGGCGATGCGGGATGAACCGGAAGCCTGGTTACGGT  
GCCGAATGCGCGCTAACCTAGAACCACAAAGGGTGTGGTTCGATTAAGACAGCAGGACGGTGG  
TCATGGAAGTCGAAATCCGCTAAGGAGTGTGTAACAACCTACCTGCCGAATCAACTAGCCCCGAAA  
ATGGATGGCGCTGAAGCGCGCGACCCACACCAGGCCATCTGGGCGAGCGCCATGCCCCGATGAGTA  
GGAGGGCGCGGCGGCCCGCCGAAAACCCGGGGCGCGAGCCCGGGCGGAGCGGCCGTCCGGTGCAG  
ATCTTGGTGGTAGTAGCAAATATTCAAATGAGAACTTTGAAGGCCGAAGAGGAGAAAAGGTTCCATG  
TGAACGGCACTTGCACATGGGTAAGCCGATCCTAAGGGACGGGGTAACCCCGGCAGAGAGCGCGA  
CCACGCGCGTCCCCGAAAGGGAATCGGGTAAAGATTTCCCGAGCCGGGACGTGGCGGTTGACGG  
CGACGTTAGGAAGTCCGAGACGCCGGCGGGGGCCTCGGGAAGAGTTATCTTTTCTGCTTAACGGC  
CCGCCAACCTGGAAACGGTTCAGCCGGAGGTAGGGTCCAGCGGCCGGAAGAGCACCCGACGTCG  
CGCGGTGTCCGGTGCGCCCCCCGGCGGCCCTTGAAAATCCGGAGGACCCGAGTACCGTCCACGCCCG  
GTCGTACTCATAACCGCATCAGGTCTCCAAGGTGAACAGCCTCTGGCCAATGGAACAATGTAGGCA  
AGGGAAGTCGGCAAAAACGGATCCGTAACCTCGGGAAAAGGATTGGCTCTGAGGGCTGGGCTCGGG  
GGTCCCGGCCCGAACCCGTCCGGTGCCTGGCGGACTGCTCGAGCTGCTCGCGCGGCGAGAGCGGG  
CCGCCGCGTCCGGGCCGGGGACGGACCCGGGAACGGCCCCCTCGGGGGCCTTCCCCGGGCGTCA  
ACAGCCGACTCAGAACTGGTACGGACAAGGGGAATCCGACTGTTTAATTAATAAACAAGCATTGCGA  
TGGTCTTCGCGGATGCTGACGCAATGTGATTTCTGCCAGTGTCTGAATGTCAAAGTGAAGAAAT  
CAACCAAGCGCGGGTAAACGGCGGGAGTAACTATGACTCTCTTAAGGTAGCCAAATGCCTCGTCAT  
CTAATTAGTACGCGCATGAATGGATTAACGAGATTTCCACTGTCCCTGTCTACTATCCAGCGAAACC  
ACAGCCAAGGGAAACGGGCTTGGCGGAATCAGCGGGGAAAGAAGACCCCTGTTGAGCTTGACTCTAG  
TCCGACTTTGTGAAATGACTTGAGAGGTGAGGATAAGTGGGAGCCCTCGGGCGCAAGTGAAATAC  
CACTACTTTTAAACGTTATTTTACTTATTCCGTGAGTCCGGAAGCGGGGCTGGCCCCCTCTTTTGGCTC  
TAAGGCCCGAGTCCCTCGGGCCGATCCGGGCGGAAGACATTGTCAGGTGGGGAGTTTGGCTGGGG  
CGGCACATCTGTAAAAGATAACGCAGGTGTCCTAAGATGAGCTCAACGAGAACAGAAATCTCGTG  
TGGAACAAAAGGGTAAAAGCTCGTTTGAATCTGATTTCCAGTACGAATACGAACCGTGAAAGCGTG  
GCCTATCGATCCTTTAGACCTTCGGAGTTTGAAGCTAGAGGTGTCAGAAAAGTTACCACAGGGATAA  
CTGGCTTGTGGCAGCCAAGCGTTCATAGCGACGTTGCTTTTTGATCCTTCGATGTCGGCTCTTCCTAT  
CATTGTGAAGCAGAATTCACCAAGTGTGGATTGTTACCCACCAATAGGGAACGTGAGCTGGGTT  
TAGACCGTCGTGAGACAGGTTAGTTTTACCCTACTGATGACCGTGCCGCGATAGTAATTC AACCTAG  
TACGAGAGGAACCGTTGATTCACACAATTGGTCATCGCGCTTGGTTGAAAAGCCAGTGGCGCGAAG  
CTACCGTGTGCCGATTATGACTGAACGCCTCTAAGTCAGAATCCAAGCTAGCAAGCGGCGCCTGC  
GCCCGCCGCCCGCCCCGACCCACGTTAGGGGCGCAAGCCCCCAAGGGCCCGTGCCACCGGCCAAG  
CCGGCCCCGGCCGACGCGCCGCGGCCGGCCGCTCGAAGCTCCCTTCCAACGGGCGGGCGGGCTGA  
ATCCTTTGCAGACGACTTAAATACGCGACGGGGCATTGTAAGTGGCAGAGTGGCCTTGCTGCCACG  
ATCCACTGAGATCCAGCCCCGCGTCGCACGGATTGTCCTTCCCCCTCTCCCCCGCGCCCCGCGCA  
GGTCCCCCCCCGAGCCCGCCCCGGTCCGGCCAAGTCCCCAG



>O.barthii\_IRGC101252\_45S

ACCTGGTTGATCCTGCCAGTAGTCATATGCTTGTCTCAAAGATTAAGCCATGCATGTGCAAGTATGAA  
CTAATTCGAACGTGAAACTGCGAATGGCTCATTAAATCAGTTATAGTTTGTGGTACGTGCTA  
CTCGGATAACCGTAGTAATTCTAGAGCTAATACGTGCAACAAACCCCGACTTCCGGGAGGGGCGCAT  
TTATTAGATAAAAGGCTGACGCGGGCTCTGCCCGCTGATCCGATGATTCATGATAACTCGACGGATCG  
CACGGCCCTCGTGCCGGCGACGCATCATTCAAATTTCTGCCCTATCAACTTTCGATGGTAGGATAGG  
GGCCTACCATGGTGGTGACGGGTGACGGAGAATTAGGGTTCGATTCCGGAGAGGGAGCCTGAGAA  
ACGGCTACCACATCCAAGGAAGGCAGCAGGCGCGCAAATTACCCAATCCTGACACGGGGAGGTAG  
TGACAATAAATAACAATACCGGGCGCTTTAGTGTCTGGTAATTGGAATGAGTACAATCTAAATCCCTT  
AACGAGGATCCATTGGAGGGCAAGTCTGGTGCCAGCAGCCGCGTAATTCCAGCTCCAATAGCGTA  
TATTTAAGTTGTTGCAGTTAAAAAGCTCGTAGTTGGACCTTGGGCCGGGTCCGGCCGGTCCGCCTCAC  
GGCGAGCACCGACCTACTCGACCCTTCTGCCGGCGATGCGCTCCTGGCCTTAACTGGCCGGGTCTGT  
GCCTCCGGCGCCGTTACTTTGAAGAAATTAGAGTGTCAAAGCAAGCCATCGCTCTGGATACATTAG  
CATGGGATAACATCATAGGATTCGGTCTATTGTGTGGCCTTCGGGATCGGAGTAATGATTAATAG  
GGACAGTCGGGGGCATTTCGATTTTCATAGTCAAGAGGTGAAATCTTGGATTTATGAAAGACGAACAA  
CTGCGAAAGCAATTGCCAAGGATGTTTTCTAATAAACAAGAACGAAAGTTGGGGCTCGAAGACGAT  
CAGATACCGTCTTAGTCTCAACCATAAACGATGCCGACCAGGGATCGGCGGATGTTGCTTATAGGAC  
TCCGCCGGCACCTTATGAGAAATCAAAGTCTTTGGGTTCCGGGGGAGTATGGTTCGCAAGGCTGAA  
ACTTAAAGGAATTGACGGAAGGGCACACCAGGCGTGGAGCCTGCGGCTTAAATTTGACTCAACACG  
GGGAAACTTACCAGGTCCAGACATAGCAAGGATTGACAGACTGAGAGCTCTTTCTTGATTCTATGGG  
TGGTGGTGCATGGCCGTTCTTAGTTGGTGGAGCGATTTGTCTGGTAAATCCGTTAACGAACGAGAC  
CTCAGCCTGCTAACTAGCTATGCGGAGCCATCCCTCCGCAGCTAGCTTCTTAGAGGGACTATGGCCG  
TTTAGGCCACGGAAGTTTGAGGCAATAACAGGTCTGTGATGCCCTTAGATGTTCTGGCCGACGCG  
CGCTACACTGATGTATTCAACGAGTATATAGCCTTGGCCGACAGGCCCGGTAATCTTGGGAAATTT  
ATCGTGATGGGGATAGATCATTGCAATTGTTGGTCTTCAACGAGGAATGCCTAGTAAGCGCGAGTCA  
TCAGCTCGCGTTGACTACGTCCCTGCCCTTTGTACACACCGCCCGTCGCTCCTACCGATTGAATGGT  
CCGGTGAAGTGTTCGGATCGCGGGCAGCGGGGGCGGTTCCGCCCGCCCGACGTCGCGAGAAGTCCA  
TTGAACCTTATCATTAGAGGAAGGAGAAGTCGTAACAAGGTTTCCGTAGGTGAACCTGCGGAAGG  
ATCATTGTCTGATGACCCTGACCAAAACAGACCGCGAACGCGTCACCCCTGCCCGCCGAGCGCTCGCG  
CGCTCGGCAACCGAGGCCCGCCCGGGCCGCAACAGAACCACGGCGCCGACGGCGTCAAGGAACAC  
AGCGATACGCCCGCGCCGCTCGGTCCGGCCCTGGCCGTCCGGCGGGCGGGCGCGATACCACGAGTTA  
AATCCACACGACTCTCGGCAACGGATATCTCGGCTCTCGCATCGATGAAGAACGTAGCGAAATGCG  
ATACCTGGTGTGAATTGCAGAAATCCCGTGAACCATCGAGTCTTTGAACGCAAGTTGCGCCCGAGGC  
CATCCGGCCGAGGGCACGCCTGCCTGGGCGTCACGCCAAAAGACGCTCCACGCGCCCTCCTATCC  
GGGAGGGCGCGGGGACGCGGTGTCTGGCCTCCCGCGCCTCGCGGCGCGGTGGGCCGAAGCTCGGG  
CTGCCGGCGAAGCGTGCCGGGCACAGCGCATGGTGGACAGCTCACGCTGGCTCTAGGCCGACAGTG  
CACCCCGGCGCGCGGCCGGCGGATGGCCCTCAGGACCCAAACGCACCGAGAGCGAACGCCTCG  
GACCCGACCCAGGTCAAGCGGACTACCCGCTGAGTTTAAAGCATATAAATAAGCGAGGAGGAAG  
AAACTTACGAGGATCCCCTAGTAACGCGAGCGAACCCGGAGATGCCAGCTTGAGAATCGGGCG  
GCCGCGCCGTCGGAATTGTAGTCTGGAGAGGCGTCTCAGCGACGACCGGGCCCAAGTCCCCTGG  
AAAGGGGCGCCTGGGAGGGTGAGAGCCCGTCCGGCCCGGACCCGTGCGCCACGAGGCGCCGT  
CAACGAGTCGGGTTGTTTGGGAATGCAGCCAAATCGGGCGGTAAACTCCGTCCAAGGCTAAATAC  
AGGCGAGAGACCGATAGCGAACAAGTACCGCGAGGGAAAGATGAAAAGGACTTTGAAAAGAGAG  
TCAAAGAGTGCTTGAAATTGCCGGGAGGGAAGCGGATGGGGGCGGCGATGCGCCCGGCCGAT  
GCGGAACGGCTTCGGTGGTCCGCCGATCGGCTCGGGGCGTGGACTGTTGTGCGGCCGCGCCGGCG  
GCCAAAGCCCGGGGGCTCCGCGCCCCCGGCAGCCGTCTGTCGGCGCAGCCGGTCAACGCGCGCCTC  
TGGCGCGCCCTCGGGGCGCTGCGTGCACGGCCTGCGGGTCCCATCCGACCCGTCTTGAAC  
ACGGACCAAGGAGTCTGACATGCGTGCAGTGCACGGGTTCTGAAACCTGGGATGCGCAAGGAAG  
CTGACGAGCGGGAGGCCCTCACGGCCCGACCGCTGGCCGACCCTGATCTTCTGTGAAGGGTTCGA  
GTTGGAGCACGCCTGTGCGGACCCGAAAGATGGTGAACATGCCTGAGCGGGGCGAAGCCAGAGG  
AACTCTGGTGGAGGCTCGAAGCGATACTGACGTGCAAATCGTTCGTCTGACTTGGGTATAGGGGC  
GAAAGACTAATCGAACCATCTAGTAGTGGTTCCTCCGAAGTTTCCCTCAGGATAGCTGGAGCCCA  
TTACGAGTTCTATCGGGTAAAGCCAATGATTAGAGGCATCGGGGCGCAACGCCCTCGACCTATTCT  
CAAACCTTAAATAGGTAGGACGGCGGGCTGCTCCGGTGAGCCGCGCCACGGAATCGGGAGCTCCA  
AGTGGGCCATTTTTGGTAAGCAGAACTGGCGATGCGGGATGAACCGGAAGCCTGGTTACGGTGGCC  
AACTGCGCGCTAACCTAGAACCACAAAGGGTGTGGTTCGATTAAGACAGCAGGACGGTGGTTCATG

GAAGTCGAAATCCGCTAAGGAGTGTGTAACAACCTCACCTGCCGAATCAACTAGCCCCGAAAATGGA  
TGGCGCTGAAGCGCGCGACCCACACCAGGCCATCTGGGCGAGCGCCATGCCCCGATGAGTAGGAG  
GGCGCGGGCGGCCCGCCGAAAACCCGGGGCGCGAGCCCGGGCGGAGCGGCCGTCCGGTGCAGATCTT  
GGTGGTAGTAGCAAATATTCAAATGAGAACTTTGAAGGCCGAAGAGGAGAAAGGTTCCATGTGAAC  
GGCACTTGCACATGGGTAAGCCGATCCTAAGGGACGGGGTAACCCCGGCAGAGAGCGCGACCACG  
CGCGTGCCCCGAAAGGGAATCGGGTTAAGATTTCCCGAGCCGGGACGTGGCGGTTGACGGCGACG  
TTAGGAAGTCCGGAGACGCCGGCGGGGGCCTCGGGAAGAGTTATCTTTTCTGCTTAACGGCCCCGC  
AACCCCTGGAACGGTTCAGCCGGAGGTAGGGTCCAGCGGCCGGAAGAGCACCCGCACGTCCGCGCG  
TGTCGGGTGCGCCCCCGCGGCCCTTAAAAATCCGGAGGACCGAGTACCGTCCACGCCCGGTGCGTA  
CTCATAACCCGCATCAGGTCTCCAAGGTGAACAGCCTCTGGCCAATGGAACAATGTAGGCAAGGGAA  
GTCGGCAAAAACGGATCCGTAACCTTCGGGAAAAGGATTGGCTCTGAGGGCTGGGCTCGGGGGTCCC  
GGCCCCGAACCCGTCCGGTCCGGCGGACTGCTCGAGCTGCTCGCGCGGCGAGAGCGGGCCCGCCG  
CGTGCCGGCCGGGGACGGACCGGGAACGGCCCCCTCGGGGGCCTTCCCCGGGCGTGAACAGCC  
GACTCAGAACTGGTACGGACAAGGGGAATCCGACTGTTTAAATTAACAAGCATTGCGATGGTCC  
TCGCGGATGTGACGCAATGTGATTTCTGCCAGTGCTCTGAATGTCAAAGTGAAGAAATTAACCA  
AGCGCGGTAAACGGCGGAGTAACACTATGACTCTCTTAAGGTAGCCAAATGCCTCGTCATCTAATTA  
GTGACGCGCATGAATGGATTAACGAGATTCCCCTGTCCCTGTCTACTATCCAGCGAAACCACAGCC  
AAGGGAACGGGCTTGGCGGAATCAGCGGGGAAAGAAGACCCTGTTGAGCTTACTCTAGTCCGAC  
TTTGTGAAATGACTTGAGAGGTGTAGGATAAGTGGGAGCCCTCGGGCGCAAGTGAATAACCACTAC  
TTTTAACGTTATTTTACTTATTCCGTGAGTCGGAAGCGGGGCCTGGCCCCCTCTTTTGGCTCTAAGGC  
CCGAGTCCCTCGGGCCGATCCGGGCGGAAGACATTGTCAGGTGGGGAGTTTGGCTGGGGCGGCAC  
ATCTGTTAAAAGATAACGCAGGTGTCTAAGATGAGCTCAACGAGAACAGAAATCTCGTGTGGAAC  
AAAAGGGTAAAAGCTCGTTTGAATCTGATTTCCAGTACGAATACGAACCGTGAAAGCGTGGCCTATC  
GATCCTTTAGACCTTCGGAGTTTGAAGCTAGAGGTGTCAGAAAAGTTACCACAGGGATAACTGGCT  
TGTGGCAGCCAAGCGTTCATAGCGACGTTGCTTTTTGATCCTTCGATGTCGGCTCTTCCCTATCATTGT  
GAAGCAGAATTCACCAAGTGTGGATTGTTACCCACCAATAGGGAACGTGAGCTGGGTTTAGACC  
GTCGTGAGACAGGTTAGTTTACCCTACTGATGACCGTGCCGCGATAGTAATTCAACCTAGTACGAG  
AGGAACCGTTGATTCACACAATTGGTCATCGCGCTTGGTTGAAAAGCCAGTGGCGCGAAGCTACCG  
TGTGCCGATTATGACTGAACGCCTTAAGTCAGAATCCAAGCTAGCAAGCGGCGCCTGCGCCCCG  
CGCCCCCGGACCCACGTTAGGGGCGCAAGCCCCAAGGGCCCGTGCCACTGGCCAAGCCGGCC  
CGGCCGACGCGCCGCGGCCGCGCCTCGAAGCTCCCTTCCCAACGGGCGGCGGGCTGAATCCTTT  
GCAGACGACTTAAATACGCGACGGGGCATTGTAAGTGGCAGAGTGGCCTTGGCTGCCACGATCCACT  
GAGATCCAGCCCCGCGTCGCACGGATTTCGTCCCTCCCCCACACACCCTCTCCCCCGCACCCCGCG  
CAGGTTCTCCCCCGGAGCCCGCCCCAGTCCCGCCGAGTCCCCAAGTCTCTTAAGTCCGCTGCGTT  
GG

>O.glaberrima\_IRGC103486\_45S

ACCTGGTTGATCCTGCCAGTAGTCATATGCTTGTCTCAAAGATTAAGCCATGCATGTGCAAGTATGAA  
CTAATTCGAACTGTGAAACTGCGAATGGCTCATTAAATCAGTTATAGTTTGGTTGATGGTACGTGCTA  
CTCGGATAACCGTAGTAATTCTAGAGCTAATACTGCAACAAACCCCGACTTCCGGGAGGGGCGCAT  
TTATTAGATAAAAAGGCTGACGCGGGCTCTGCCCGCTGATCCGATGATTCATGATAACTCGACGGATCG  
CACGGCCCTCGTGCCGGCGACGCATCTTCAAATTTCTGCCCTATCAACTTTCGATGGTAGGATAGG  
GGCCTACCATGGTGGTGACGGGTGACGGAGAATTAGGGTTCGATTCCGGAGAGGGAGCCTGAGAA  
ACGGCTACCACATCCAAGGAAGGCAGCAGGCGCGCAAATTACCCAATCCTGACACGGGGAGGTAG  
TGACAATAAATAACAATACCGGGCGCTTTAGTGTCTGGTAATTGGAATGAGTACAATCTAAATCCCTT  
AACGAGGATCCATTGGAGGGCAAGTCTGGTGCCAGCAGCCGCGTAATTCCAGCTCCAATAGCGTA  
TATTTAAGTTGTTGCAGTTAAAAAGCTCGTAGTTGGACCTTGGGCCGGGTCCGCCGGTCCGCCTCAC  
GGCGAGCACCGACCTACTCGACCCTTCTGCCGGCGATGCGCTCCTGGCCTTAACTGGCCGGGTCCGT  
GCCTCCGGCGCCGTTACTTTGAAGAAATTAGAGTGCTCAAAGCAAGCCATCGCTCTGGATACATTAG  
CATGGGATAACATCATAGGATTCCGGTCTATTGTGTTGGCCTTCGGGATCGGAGTAATGATTAATAG  
GGACAGTCGGGGGCATTCGTATTTCATAGTCAGAGGTGAAATTTCTGGATTTATGAAAGACGAACAA  
CTGCGAAAGCATTGCCAAGGATGTTTTCAATTAATCAAGAACGAAAGTTGGGGGCTCGAAGACGAT  
CAGATACCGTCTAGTCTCAACCATAAACGATGCCGACCAGGGATCGGCGGATGTTGCTTATAGGAC  
TCCGCCGGCACCTTATGAGAAATCAAAGTCTTTGGGTTCCGGGGGGAGTATGGTCCGAAGGCTGAA  
ACTTAAAGGAATTGACGGAAGGGCACCAAGGGCGTGGAGCCTGCGGCTTAAATTTGACTCAACACG  
GGGAAACTTACCAGGTCCAGACATAGCAAGGATTGACAGACTGAGAGCTCTTTCTTGATTCTATGGG  
TGGTGGTGCATGGCCGTTCTTAGTTGGTGGAGCGATTTGTCTGGTTAATTCGGTTAACGAACGAGAC

CTCAGCCTGCTAACTAGCTATGCGGAGCCATCCCTCCGCAGCTAGCTTCTTAGAGGGACTATGGCCG  
TTTAGGCCACGGAAGTTTGAGGCAATAACAGGTCTGTGATGCCCTTAGATGTTCTGGGCCGCACGCG  
CGCTACACTGATGTATTCAACGAGTATATAGCCTTGGCCGACAGGCCCGGGTAATCTTGGGAAATTC  
ATCGTGATGGGGATAGATCATTGCAATTGTTGGTCTTCAACGAGGAATGCCTAGTAAGCGCGAGTCA  
TCAGCTCGCGTTGACTACGTCCCTGCCCTTGTACACACCGCCCGTCGCTCCTACCGATTGAATGGT  
CCGGTGAAGTGTTCCGATCGCGGCGACGGGGGCGGTTCCGCCCCCCGACGTCGCGAGAAGTCCA  
TTGAACCTTATCATTTAGAGGAAGGAGAAGTCGTAACAAGGTTTCCGTAGGTGAACCTGCGGAAGG  
ATCATTGTGCTGACCCTGACCAAAACAGACCGCAACGCGTCACCCCTGCCCGCCGAGCGCTCGCG  
CGCTCGGCAACCGAGGCCCCCGGGCCGCAACAGAACCCACGGCGCCGACGGCGTCAAGGAACAC  
AGCGATACGCCCGCGCCGCTCGGTGCGCCCTGGCCGTCCGGCGGGCGCGGGCGGATAACCACGAGTTA  
AATCCACACGACTCTCGGCAACGGATATCTCGGCTCTCGCATCGATGAAGAACGTAGCGAAATGCG  
ATACCTGGTGTGAATTGCAGAAATCCCGTGAACCATCGAGTCTTTGAACGCAAGTTGCGCCCGAGGC  
CATCCGGCCGAGGGCACGCCTGCCTGGGCGTCACGCCAAAAGACGCTCCACGCGCCCTCCTATCC  
GGGAGGGCGCGGGGACGCGGTGTCTGGCCTCCCGCCTCGCGGCGCGGTGGGCCGAAGCTCGGG  
CTGCCGCGAAGCGTGCAGGGGACAGCGCATGGTGGACAGCTCAGCTGGCTTAGGCCCGCACTCG  
CACCCCGCGCGCGCCGCGGATGCCCTCAGGACCCAAACGCAACCGAGAGCGAACGCCTCG  
GACCGCGACCCCAAGTCAAGGCGGACTACCCCGTGAATTTAAGCATATAAATAAGCGGAGGAGAAG  
AACTTACGAGGATTCCCTAGTAACGGCGAGCGAACCGGGAGATGCCAGCTTGAGAATCGGGCG  
GCCGCGCCGTCCGAATTGTAGTCTGGAGAGGCGTCTCAGCGACGGACCCGGGCCAAGTCCCTGG  
AAAGGGGCGCCTGGGAGGGTGAGAGCCCCGTCCGGCCCGGACCCTGTGCCCCACGAGGCGCCGT  
CAACGAGTCGGGTTGTTTGGGAATGCAGCCAAATCGGGCGGTAAACTCCGTCCAAGGCTAAATAC  
AGGCGAGAGACCGATAGCGAACAAGTACCGCGAGGGAAAGATGAAAAGGACTTTGAAAAGAGAG  
TCAAAGAGTGCTTGAAATTGCCGGGAGGGAAAGCGGATGGGGGCGCGGATGCGCCCCGGCCGTAT  
GCGGAACGGCTTCGGTGGTCCGCCGATCGGCTCGGGCGTGGACTGTTGTGCGGCCGCGCCGGCG  
GCCAAAGCCCGGGGGCTCCGCGCCCCCGGCAGCCGTCTGCGCGCAGCCGGTACCCGCGCGCCTC  
TGGCGCGCCCTCGGGGCGTGCCTGCAACGGCCTGCGGGCTCCCATCCGACCCGTCTTGAAC  
ACGGACCAAGGAGTCTGACATGCGTGCAGTGCAGGGTCTGAAACCTGGGATGCGCAAGGAAG  
CTGACGAGCGGGAGGCCCTCACGGGCCGACCGCTGGCCGACCCTGATCTTGTGAAGGGTTCGA  
GTTGGAGCACGCCTGTCCGGACCCGAAAGATGGTGAACATGCCTGAGCGGGGCGAAGCCAGAGG  
AACTCTGGTGGAGGCTCGAAGCGATACTGACGTGCAAATCGTTCGTCTGACTTGGGTATAGGGG  
GAAAGACTAATCGAACCATCTAGTAGCTGGTCCCTCCGAAGTTTCCCTCAGGATAGCTGGAGCCCA  
TTACGAGTTCTATCGGGTAAAGCCAATGATTAGAGGCATCGGGGGCGCAACGCCCTCGACCTATTCT  
CAAACCTTTAAATAGGTAGGACGGCGCGGCTGCTCCGGTGAGCCGCGCCACGGAATCGGGAGCTCCA  
AGTGGGCCATTTTTGGTAAGCAGAACTGGCGATGCGGGATGAACCGGAAGCCTGGTTACGGTGCCG  
AACTGCGCGCTAACCTAGAACCCACAAAGGGTGTGGTTCGATTAAGACAGCAGGACGGTGGTCATG  
GAAGTCGAAATCCGCTAAGGAGTGTGTAACAACCTACCTGCCGAATCAACTAGCCCCGAAAATGGA  
TGGCGCTGAAGCGCGGACCCACACCAGGCCATCTGGGCGAGCGCCATGCCCCGATGAGTAGGAG  
GGCGCGGCGCCGCGCAAAACCCGGGCGGAGCCCGGCGGAGCGCCGCGTGGTGCAGATCTT  
GGTGGTAGTAGCAATATTCAAATGAGAACTTTGAAGGCCGAAGAGGAGAAAGGTTCCATGTGAAC  
GGCACTTGACATGGGTAAGCCGATCCTAAGGGACGGGGTAACCCCGGACAGAGAGCGGACCCAG  
CGCGTGCCCCGAAAGGGAATCGGGTTAAGATTTCCCGAGCCGGGACGTGGCGGTTGACGGCGACG  
TTAGGAAGTCCGGAGACGCCGGCGGGGCTCGGGAAGAGTTATCTTTTCTGCTTAACGGCCCCG  
AACCCCTGGAAACGGTTCAGCCGGAGGTAGGGTCCAGCGCCGGAAGAGCACCGCACGTCGCGCGG  
TGTCCGGTGCGCCCCCGGCGGCCCTTGAATCCGGAGGACCGAGTACCGTCCACGCCCGGTGCTA  
CTCATAACCGCATCAGGTCTCCAAGGTGAACAGCCTCTGGCCAATGGAACAATGTAGGCAAGGGAA  
GTCGGCAAAACGGATCCGTAACCTTCGGGAAAAGGATTGGCTCTGAGGGCTGGGCTCGGGGGTCCC  
GGCCCCGAACCCGTGGCTGCCGGCGGACTGCTCGAGCTGCTCGCGCGGCGAGAGCGGGCCGCG  
CGTGCCGGCCGGGGACGGACCGGGAACGGCCCCCTCGGGGGCCTTCCCCGGGCGTGAACAGCC  
GACTCAGAACTGGTACGGACAAGGGGAATCCGACTGTTAATTAACAAAGCATTGCGATGGTCC  
TCGCGGATGCTGACGCAATGTGATTTCTGCCAGTGCTCTGAATGTCAAAGTGAAGAAATTCAACCA  
AGCGCGGGTAAACGGCGGGAGTAACATGACTCTCTTAAGGTAGCCAAATGCCTCGTCATCTAATTA  
GTGACGCGCATGAATGGATTAACGAGATTCCCACTGTCCCTGTCTACTATCCAGCGAAACCACAGCC  
AAGGGAACGGCTTGGCGGAATCAGCGGGGAAAGAAGACCCTGTTGAGCTTACTCTAGTCCGAC  
TTTTGAAATGACTTGAGAGGTGTAGGATAAGTGGGAGCCCTCGGGCGCAAGTGAATACCCTAC  
TTTTAACGTTATTTTACTTATTCCGTGAGTCGGAAGCGGGGCTGGCCCCCTCTTTTGGCTCTAAGGC  
CCGAGTCCCTCGGGCCGATCCGGGCGGAAGACATTGTCAGGTGGGGAGTTTGGCTGGGGCGGCAC

ATCTGTAAAAGATAACGCAGGTGTCCTAAGATGAGCTCAACGAGAACAGAAATCTCGTGTGGAAC  
AAAAGGGTAAAAGCTCGTTTGATTCTGATTTCCAGTACGAATACGAACCGTGAAAGCGTGGCCTATC  
GATCCTTTAGACCTTCGGAGTTTGAAGCTAGAGGTGTCAGAAAAGTTACCACAGGGATAACTGGCT  
TGTGGCAGCCAAGCGTTCATAGCGACGTTGCTTTTTGATCCTTCGATGTCGGCTCTTCCTATCATTGT  
GAAGCAGAATTCACCAAGTGTGGATTGTTACCCACCAATAGGGAACGTGAGCTGGGTTTAGACC  
GTCGTGAGACAGGTTAGTTTTACCCTACTGATGACCGTGCCCGGATAGTAATTCACCTAGTACGAG  
AGGAACCGTTGATTCACACAATTGGTCATCGCGCTTGTTGAAAAGCCAGTGGCGCGAAGCTACCG  
TGTGCCGGATTATGACTGAACGCCTCTAAGTCAGAATCCAAGCTAGCAAGCGGCGCCTGCGCCCGC  
CGCCCGCCCCGACCCACGTTAGGGGCGCAAGCCCCAAGGGCCCCGTGCCACTGGCCAAGCCGGCC  
CGGCCGACGCGCCGCGGCCGCGCCTCGAAGCTCCCTTCCCAACGGGCGGCGGGCTGAATCCTTT  
GCAGACGACTTAAATACGCGACGGGGCATTGTAAGTGGCAGAGTGGCCTTGCTGCCACGATCCACT  
GAGATCCAGCCCCGCGTCGCACGGATTGTCCTCCCTCCCCCACACACCTCTCCCCCGCACCCCGCG  
CAGGTTCTCCCCCGAGCCCCAGTCCCAGGAGTCCCCAAGTCTCTAAGTCCGCTGCGTT  
GGTGCCAAGGCGCGAA

>O.glumaepatula\_IRGC88793\_45S

ACCTGGTTGATCCTGCCAGTAGTCATATGCTTGTCTCAAAGATTAAGCCATGCATGTGCAAGTATGAA  
CTAATTCGAACTGTGAAACTGCGAATGGCTCATTAAATCAGTTATAGTTTGTGTTGATGGTACGTGCTA  
CTCGGATAACCGTAGTAATTCTAGAGCTAATACGTGCAACAAACCCCGACTTCCGGGAGGGGCGCAT  
TTATTAGATAAAAGGCTGACGCGGGCTCTGCCCGCTGATCCGATGATTCATGATAACTCGACGGATCG  
CACGGCCCTCGTGCCGGCGACGCATCATTCAAATTTCTGCCCTATCAACTTTCGATGGTAGGATAGG  
GGCCTACCATGGTGGTGACGGGTGACGGAGAATTAGGGTTCGATTCCGGAGAGGGAGCCTGAGAA  
ACGGCTACCACATCCAAGGAAGGCAGCAGGCGCGCAAATACCCAATCCTGACACGGGGAGGTAG  
TGACAATAAATAACAATACCGGGCGCTTTAGTGTCTGGTAATTGGAATGAGTACAATCTAAATCCCTT  
AACGAGGATCCATTGGAGGGCAAGTCTGGTGCCAGCAGCCGCGTAATTCCAGCTCCAATAGCGTA  
TATTTAAGTTGTTGCAGTTAAAAGCTCGTAGTTGGACCTTGGGCCGGGTGCGCCGGTCCGCCTCAC  
GGCGAGCACCGACCTACTCGACCCTTCTGCCGGCGATGCGCTCCTGGCCTTAACTGGCCGGGTCGT  
GCCTCCGGCGCCGTTACTTTGAAGAAATTAGAGTGCTCAAAGCAAGCCATCGCTCTGGATACATTAG  
CATGGGATAACATCATAGGATTCCGGTCTATTGTGTTGGCCTTCGGGATCGGAGTAATGATTAATAG  
GGACAGTCGGGGGCATTTCGATTTTCATAGTCAGAGGTGAAATTCCTGGATTTATGAAAGACGAACAA  
CTGCGAAAGCATTGCCAAGGATGTTTTCAATTAATCAAGAACGAAAGTTGGGGGCTCGAAGACGAT  
CAGATACCGTCTAGTCTCAACCATAAACGATGCCGACCAGGGATCGGCGGATGTTGCTTATAGGAC  
TCCGCCGGCACCTTATGAGAAATCAAAGTCTTTGGGTTCCGGGGGGAGTATGGTTCGCAAGGCTGAA  
ACTTAAAGGAATTGACGGAAGGGCACCACCAGGCGTGGAGCCTGCGGCTTAAATTTGACTCAACACG  
GGAAACTTACCAGGTCCAGACATAGCAAGGATTGACAGACTGAGAGCTCTTTCTTGATTCTATGGG  
TGGTGGTGCATGGCCGTTCTTAGTTGGTGGAGCGATTTGTCTGGTTAATTCGGTTAACGAACGAGAC  
CTCAGCCTGCTAACTAGCTATGCGGAGCCATCCCTCCGAGCTAGCTTCTTAGAGGGACTATGGCCG  
TTTAGGCCACGGAAGTTTGAGGCAATAACAGGTCTGTGATGCCCTTAGATGTTCTGGGCCGACGCG  
CGCTACACTGATGTATTCAACGAGTATATAGCCTTGCCCGACAGGCCCGGTAATCTTGGGAAATTC  
ATCGTGATGGGATAGATCATTGCAATTGTTGGTCTTCAACGAGGAATGCCTAGTAAGCAGCGAGTCA  
TCAGTTCGCGTTGACTACGTCCTCCCTTTGTACACACCGCCCGTCGCTCCTACCGATTGAATGGT  
CCGGTGAAGTGTTCGGATCGCGGGCAGCGGGCGGTTTCGCCGCCCGACGTCGCGAGAAGTCCA  
TTGAACCTTATCATTTAGAGGAAGGAGAAGTCGTAACAAGGTTTCCGTAGGTGAACCTGCGGAAGG  
ATCATTGTCGTGACCCTGACCAAAACAGACCGCGAACGCGTCACCCCTGCCCGCCGAGCGCTCGCG  
CGCGAGGCAACCGAGGCCCGGGCCGCAACAGAACCACGGCGCCGACGGCGTCAAGGAACAC  
AGCGATACGCCCGCGCCGCGCCGTCGGCCCTGGCCATCCGGCGGCGCGGCGGCGATAACCACGAGTTA  
ATCCACACGACTCTCGGCAACGGATATCTCGGCTCTCGCATCGATGAAGAACGTAGCGAAATGCGAT  
ACCTGGTGTGAATTGCAGAATCCCGTGAACCATCGAGTCTTTGAACGCAAGTTGCGCCCGAGGCCA  
TCCGGCCGAGGGCACGCCTGCCTGGGCGTCACGCCAAAAGACGCTCCACGCGCCCCCTATCCGG  
GAGGGCGCGGGGACGCGGTGTCTGGCCTCCCGCGCCTCGCGGCGCGGGCGGCGGCGGCGGCT  
GCCGGCGAAGCGTGCCGGGCACAGCGCATGGTGGACAGCTCACGCTGGCTCTAGGCCGACAGTGA  
CCCCGGCGCGCGGCGGCGGCGATGGCCCCCTCAGGACCAAAACGCACCGAGAGCGAACGCCTCGGA  
CCGCGACCCAGGTCAGGCGGACTACCCGCTGAGTTAAGCATATAAATAAGCGGAGGAGAAGAA  
ACTTACGAGGATTCCCCTAGTAACGGCGAGCGAACCAGGAGATGCCAGCTTGAGAATCGGGCGGC  
CGCGCCGTCCGAATTGTAGTCTGGAGAGGCGTCTCAGCGACGGACCGGGCCCAAGTCCCCTGGA  
AAGGGGCGCCTGGGAGGGTGAGAGCCCCGTCCGGCCCCGACCCTGTCGCCCCACGAGGCGCCGTC  
AACGAGTCGGGTTGTTTGGGAATGCAGCCCAAATCGGGCGGTAACCTCCGTCCAAGGCTAAATACA

GGCGAGAGACCGATAGCGAACAAGTACCGCGAGGGAAAAGATGAAAAGGACTTTGAAAAGAGAGT  
CAAAGAGTGCTTGAAATTGCCGGGAGGGAAGCGGATGGGGGCCGCGATGCGCCCCGGCCGTATG  
CGGAACGGCTTCGGCTGGTCCGCCGATCGGCTCGGGGCGTGGACTGTTGTCGGCCGCGCCGGCGG  
CAAAGCCCCGGGGCTCCGCGCCCCCGGCAGCCGTCGTCGGCGCAGCCGGTACCCGCGCCTCTG  
GCGCGCCCCCTCGGGGCGCTGCGCTGCAACGGCCTGCGGGCTCCCCATCCGACCCGTCTTGAAACAC  
GGACCAAGGAGTCTGACATGCGTGCAGTGCACGGGTTCTGAAACCTGGGATGCGCAAGGAAGCT  
GACGAGCGGGAGGCCCTCACGGGCCGACCCGCTGGCCGACCCTGATCTTCTGTGAAGGGTTCGAG  
TTGGAGCACGCCTGTCCGGACCCGAAAGATGGTGAACCTATGCCTGAGCGGGGCGAAGCCAGAGGA  
AACTCTGGTGGAGGCTCGAAGCGATACTGACGTGCAAATCGTTTCGTCTGACTTGGGTATAGGGGCG  
AAAGACTAATCGAACCATCTAGTAGCTGGTTCCCTCCGAAGTTTCCCTCAGGATAGCTGGAGCCAT  
TACGAGTTCTATCGGGTAAAGCCAATGATTAGAGGCATCGGGGGCGCAACGCCCTCGACCTATTCTC  
AACTTTAAATAGGTAGGACGGCGCGGCTGCTCCGGTGAGCCGCGCCACGGAATCGGGAGCTCCA  
GTGGGCCATTTTTGGTAAGCAGAACTGGCGATGCGGGATGAACCGGAAGCCTGGTTACGGTGCCGA  
ACTGCGCGCTAACCTAGAACCCACAAAGGGTGTGGTCGATTAAGACAGCAGGACGGTGGTCATGG  
AAGTCGAAATCCGCTAAGGAGTGTGTAACAACCTCACCTGCCGAATCAACTAGCCCCGAAAATGGAT  
GGCGCTGAAGCGCGCGACCCACACAGGCCATCTGGGCGAGCGCCAAGCCCCGATGAGTAGGAGG  
GCGCGGCGGCCGCGCAAAACCCGGGCGCGAGCCCCGGGCGGAGCGGCCGTGCGTGCAGATCTTG  
GTGGTAGTAGCAAATATTTCAAATGAGAACTTTGAAGGCCGAAGAGGAGAAAGGTTCCATGTGAACG  
GCACTTGACATGGGTAAGCCGATCCTAAGGGACGGGGTAACCCCGGCAGAGAGCGCGACCACGC  
GCGTGCCCCGAAAGGGAATCGGGTTAAGATTTCCCGAGCCGGGACGTGGCGGTTGACGGCGACGT  
TAGGAAGTCCGGAGACGCCGGCGGGGCTCGGGAAGAGTTATCTTTTCTGCTTAACGGCCCCGCA  
ACCTGGAAACGGTTCAGCCGGAGGTAGGGTCCAGCGGCCGGAAGAGCACCCGACGTCGCGCGGT  
GTCCGGTGCGCCCCCGGCGGCCCTTGAAAATCCGGAGGACCGAGTACCGTCCACGCCCGGTCTGAC  
TCATAACCGCATCAGGTCTCCAAGGTGAACAGCCTCTGGCCAATGGAACAATGTAGGCAAGGGAAG  
TCGGCAAACGGATCCGTAACCTTCGGGAAAAGGATTGGCTCTGAGGGCTGGGCTCGGGGGTCCC  
GCCCCGAACCCGTGCGCTGCCGGCGGACTGCTCGAGTGTCTGCGCGGCGAGAGCGGGCCGCCG  
GTGCCGGCCGGGGACGGACCGGGAACGGCCCCCTCGGGGGCTTCCCCGGGCGTGAACAGCCG  
ACTCAGAACTGGTACGGACAAGGGGAATCCGACTGTTTAATTAACAACAAGCATTGCGATGGTCT  
CGCGGATGCTGACGCAATGTGATTTCTGCCAGTGTCTGAATGTCAAAGTGAAGAAATTAACCA  
AGCGCGGGTAAACGGCGGGAGTAACCTATGACTCTCTTAAGGTAGCCAAATGCCTCGTCATCTAATTA  
GTGACGCGCATGAATGGATTAACGAGATTCCCCTGTCTACTATCCAGCGAAACCACAGCC  
AAGGGAACGGGCTTGCGGGAATCAGCGGGGAAAGAAGACCCTGTTGAGCTTGACTCTAGTCCGAC  
TTTTGAAATGACTTGAGAGGTGTAGGATAAGTGGGAGCCCTCGGGCGCAAGTGAATACCACTAC  
TTTTAACGTTATTTTACTTATTCCGTGAGTCGGAAGCGGGGCTGGCCCCCTCTTTTGGCTCTAAGG  
CCGAGTCCCTCGGGCCGATCCGGGCGGAAGACATTGTCAGGTGGGGAGTTTGGCTGGGGCGGCAC  
ATCTGTTAAAAGATAACGCAGGTGTCTAAGATGAGCTCAACGAGAACAGAAATCTCGTGTGGAAC  
AAAAGGGTAAAAGCTCGTTTGAATCTGATTTCCAGTACGAATACGAACCGTGAAAGCGTGGCCTATC  
GATCCTTTAGACCTTCGGAGTTTGAAGTAGAGGTGTGAGAAAAGTTACCACAGGGATAACTGGCT  
TGTGGCAGCCAAGCGTTCATAGCGACGTTGCTTTTGTATCCTTCGATGTCGGCTCTTCCCTATCATTG  
GAAGCAGAAATCACCAAGTGTGATTGTTTCAACCAATAGGGAACGTCGAGCTGGGTTAGACC  
GTCGTGAGACAGGTTAGTTTTACCCTACTGATGACCGTGCCGCGATAGTAATTCAACCTAGTACGAG  
AGGAACCGTTGATTCACACAATTGGTCATCGCGCTTGTTGAAAAGCCAGTGGCGCGAAGCTACCG  
TGTGCCGATTATGACTGAACGCCTCTAAGTCAAGTCAAGTCAAGCGGCGCCTGCGCCCCG  
CGCCCCCGGACCCACGTTAGGGGCGCAAGCCCCAAGGGCCCGTGCCACTGGCCAAGCCGGCC  
CGGCCGACGCGCCGCGGCCGCGCCTCGAAGCTCCCTTCCCAACGGGCGGCGGGCTGAATCCTTT  
GCAGACGACTTAAATACGCGACGGGGCATTGTAAGTGGCAGAGTGGCCTTGTGCCACGATCCACT  
GAGATCCAGCCCCGCGTCGCACGGATTTCGTCCCTCCCCCTCTCCCCCGCGCCCCGCGCAGGTTCTCC  
CCCCGAGCCCGCCCCAATCCCGCCGAGTCCCAGGTCTCTCTAG

>O.meridionalis\_IRGC105298\_45S

ACCTGGTTGATCCTGCCAGTAGTCATATGCTTGTCTCAAAGATTAAGCCATGCATGTGCAAGTATGAA  
CTAATTCGAAGTGTGAAACTGCGAATGGCTCATTAAATCAGTTATAGTTTGTGTTGATGGTACGTGCTA  
CTCGGATAACCGTAGTAATTCTAGAGCTAATACGTGCAACAAACCCCGACTTCCGGGAGGGGCGCAT  
TTATTAGATAAAAGGCTGACGCGGGCTCTGCCCGCTGATCCGATGATTCATGATAACTCGACGGATCG  
CACGGCCCTCGTGCCGGCGACGCATTCAAATTTCTGCCCTATCAACTTTCGATGGTAGGATAGG  
GGCCTACCATGGTGGTACGGGTGACGGAGAATTAGGGTTTCGATTCCGGAGAGGGAGCCTGAGAA  
ACGGCTACCACATCCAAGGAAGGCAGCAGGCGCGCAAATTAACCAATCCTGACACGGGGAGGTAG

TGACAATAAATAACAATACCGGGCGCTTTAGTGTCTGGTAATTGGAATGAGTACAATCTAAATCCCTT  
AACGAGGATCCATTGGAGGGCAAGTCTGGTGCCAGCAGCCGCGTAATTCCAGCTCCAATAGCGTA  
TATTTAAGTTGTTGCAGTTAAAAAGCTCGTAGTTGGACCTTGGGCCGGGTCGGCCGGTCCGCCTCAC  
GGCGAGCACCGACCTACTCGACCCTTCTGCCGGCGATGCGCTCCTGGCCTTAACTGGCCGGGTCGT  
GCCTCCGGCGCCGTTACTTTGAAGAAATTAGAGTGCTCAAAGCAAGCCATCGCTCTGGATACATTAG  
CATGGGATAACATCATAGGATTCCGGTCCTATTGTGTTGGCCTTCGGGATCGGAGTAATGATTAATAG  
GGACAGTCGGGGGCATTCGTATTTCATAGTCAGAGGTGAAATTCCTTGGATTTATGAAAGACGAACAA  
CTGCGAAAGCATTGCCAAGGATGTTTTCATTAATCAAGAACGAAAGTTGGGGGCTCGAAGACGAT  
CAGATACCGTCTAGTCTCAACCATAAACGATGCCGACCAGGGATCGGCGGATGTTGCTTATAGGAC  
TCCGCCGGCACCTTATGAGAAATCAAAGTCTTTGGGTTCCGGGGGGAGTATGGTCGCAAGGCTGAA  
ACTTAAAGGAATTGACGGAAGGGCACCACCAGGCGTGGAGCCTGCGGCTTAATTTGACTCAACACG  
GGGAACTTACCAGGTCCAGACATAGCAAGGATTGACAGACTGAGAGCTCTTTCTTGATTCTATGGG  
TGGTGGTGCATGGCCGTTCTTAGTTGGTGGAGCGATTTGTCTGGTTAATCCGTTAACGAACGAGAC  
CTCAGCCTGCTAACTAGCTATGCGGAGCCATCCCTCCGACGCTAGCTTCTTAGAGGGACTATGGCCG  
TTTAGGCCACGGAAGTTTGAGGCAATAACAGGTCTGTGATGCCCTTAGATGTTCTGGGCCGACGCG  
CGCTACACTGATGATTCAACGAGTATATAGCCTTGGCCGACAGGCCGGTAATCTTGGGAAATTTTC  
ATCGTGATGGGGATAGATCATTGCAATTGTTGGTCTTCAACGAGGAATGCCTAAGCAGCGAGTCA  
TCAGCTCGCGTTGACTACGTCCCTGCCCTTTGTACACACCGCCGTCGCTCCTACCGATTGAATGGT  
CCGGTGAAGTGTTCCGGATCGCGGCGACGGGGCGGTTCCGCCCCCCGACGTCGCGAGAAGTCCA  
TTGAACCTTATCATTAGAGGAAGGAGAAGTCGTAACAAGGTTTCCGTAGGTGAACCTGCGGAAGG  
ATCATTGTCGTGACCCTGACCAAAACAGACCGCAACGCGTCACCCCTGCCCGCCGAGCGCTCGCG  
CGCGAGGCAACCGAGGCCCGGGCCGCAACAGAACCACGGCGCCGACGGCGTCAAGGAACAC  
AGCGATACGCCCGCGCCGCGCCGGTCCGGCCCTGGCCGTCCGGCGGCGCGGCGGATAACCACGAGTTA  
ATCCACACGACTCTCGGCAACGGATATCTCGGCTCTCGCATCGATGAAGAACGTAGCGAAATGCGAT  
ACCTGGTGTGAATTGCAGAATCCCGTGAACCATCGAGTCTTTGAACGCAAGTTGCGCCCGAGGCCA  
TCCGGCCGAGGGCACGCCTGCCTGGGCGTCACGCCAAAAGACGCTCCACGCGCCCCCTATCCGGG  
AGGGCGCGGGGACGCGGTGTCTGGCCTCCCGCGCCTCGCGGCGGGCGGGCCGAAGCTCGGGCTG  
CCGGCGAAGCGTGCCGGGCACAGCGCATGGTGGACAGCTCACGCTGGCTCTAGGCCGCAGTGCAC  
CCCGGCGCGGGCCGCGCGATGGCCCTCAGGACCCAAACGCACCGAGAGCGAACGCCTCGGAC  
CGGACCCCAGGTACGGCGGACTACCCGCTGAGTTTAAGCATATAAATAAGCGGAGGAGAAGAAA  
CTTACGAGGATCCCCTAGTAACGGCGAGCGAACCCGGGAGATGCCAGCTTGAGAATCGGGCGGCC  
GCGCCGTCCGAATTGTAGTCTGGAGAGGCGTCTCAGCGACGGACCGGGCCCAAGTCCCCTGGAA  
AGGGGCGCCTGGGAGGGTGAGAGCCCCGTCCGGCCCCGACCCTGTGCCCCACGAGGCGCCGTCA  
ACGAGTCGGGTTGTTTGGGAATGCAGCCAAATCGGGCGGTAACCTCCGTCCAAGGCTAAATACAG  
GCGAGAGACCGATAGCGAACAAAGTACCGCGAGGGAAAGATGAAAAGGACTTTGAAAAGAGAGTC  
AAAGAGTGCTTGAATTTGCCGGGAGGGAAGCGGATGGGGGCGGCGATGCGCCCCGGCCGTATGC  
GGAACGGCTCCGGCTGGTCCGCCGATCGGCTCGGGGCGTGGACTGTTGTGCGCCGCGCCGGCGGC  
CAAAGCCCCGGGGCTCCGCGCCCCCGGACGCCGTGCTGCGGCGACCCGTTACCCGTCGCTTGAACAC  
GGACCAAGGAGTCTGACATGCGTGCAGTGCAGTTCGAGGTTCTGAAACCTGGGATGCGCAAGGAAGCT  
GACGAGCGGGAGGCCCTCACGGGCCGACCCGCTGGCCGACCCTGATCTTCTGTGAAGGGTTCGAG  
TTGGAGCACGCCTGTCGGGACCCGAAAGATGGTGAACCTATGCCTGAGCGGGGCGAAGCCAGAGGA  
AACTCTGGTGGAGGCTCGAAGCGATACTGACGTGCAAATCGTTTCGTCTGACTTGGGTATAGGGGCG  
AAAGACTAATCGAACCATCTAGTAGCTGGTTCCCTCCGAAGTTTCCCTCAGGATAGCTGGAGCCCAT  
TACGAGTTCTATCGGGTAAAGCCAATGATTAGAGGCATCGGGGGCGCAACGCCCTCGACCTATTCTC  
AACTTTAAATAGGTAGGACGGCGCGGCTGCTCCGGTGAGCCGCGCCACGGAATCGGGAGCTCCAA  
GTGGGCCATTTTTGGTAAGCAGAACTGGCGATGCGGGATGAACCGGAAGCCTGGTTACGGTGCCGA  
ACTGCGCGTAACCTAGAACCACAAAGGGTGTGGTTCGATTAAGACAGCAGGACGGTGGTTCATGG  
AAGTCGAAATCCGCTAAGGAGTGTGTAACAACCTCACCTGCCGAATCAACTAGCCCCGAAAATGGAT  
GGCGCTGAAGCGCGGACCCACACCAGGCCATCTGGGCGAGCGCCATGCCCCGATGAGTAGGAGG  
GCGCGGCGGCCCGCCGAAAACCCGGGGCGGAGCCCCGGGCGGAGCGGCCGTCCGGTGCAGATCTTG  
GTGGTAGTAGCAAATATTTCAAATGAGAACTTTGAAGGCCGAAGAGGAGAAAGGTTCCATGTGAACG  
GCACTTGACATGGGTAAGCCGATCCTAAGGGACGGGGTAACCCGGCAGAGAGCGCGACCACGC  
GCGTGCCCCGAAAGGGAATCGGGTTAAGATTTCCCGAGCCGGGACGTGGCGGTTGACGGCGACGT  
TAGGAAGTCCGGAGACGCCGGCGGGGGCCTCGGGAAGAGTTATCTTTTCTGCTTAAACGGCCCCGA  
ACCTGGAAACGGCTCAGCCGGAGGTAGGGTCCAGCGGCCGGAAGAGCACCGCACGTCGCGCGGT

GTCCGGTGCGCCCGGCGGCCCTTGAAAATCCGGAGGACCGAGTACCGTCCACGCCCGGTTCGTAC  
TCATAACCGCATCAGGTCTCCAAGGTGAACAGCCTCTGGCCAATGGAACAATGTAGGCAAGGGAAG  
TCGGCAAAACGGATCCGTAACCTCGGGAAAAGGATTGGCTCTGAGGGCTGGGCTCGGGGGTCCCG  
GCCCCGAACCCGTGCGCTGCCGGCGGACTGCTCGAGCTGCTCGCGCGGCGAGAGCGGGCCGCCGC  
GTGCCGGCCGGGGGACGGACCGGGAACGGCCCCCTCGGGGGCCTTCCCCGGGCGTGAACAGCCG  
ACTCAGAACTGGTACGGACAAGGGGAATCCGACTGTTAATTA AAAACAAGCATTGCGATGGTCCT  
CGCGGATGCTGACGCAATGTGATTTCTGCCAGTGCTCTGAATGTCAAAGTGAAGAAATCAACCA  
AGCGCGGGTAAACGGCGGGAGTA ACTATGACTCTCTTAAGGTAGCCAAATGCCTCGTCATCTAATTA  
GTGACGCGCATGAATGGATTAACGAGATTCCCCTGTCTACTATCCAGCGAAACCACAGCC  
AAGGGAACGGGCTTGGCGGAATCAGCGGGGAAAGAAGACCCTGTTGAGCTTGACTCTAGTCCGAC  
TTTGTGAAATGACTTGAGAGGTGTAGGATAAGTGGGAGCCCTCGGGCGCAAGTGA AATACCACTAC  
TTTTAACGTTATTTTACTTATTCCGTGAGTCGGAAGCGGGCCTGGCCCCCTCTTTTGGCTCTAAGGC  
CCGAGTCCCTCGGGCCGATCCGGGCGGAAGACATTGTCAGGTGGGGAGTTTGGCTGGGGCGGCAC  
ATCTGTTAAAAGATAACGCAGGTGTCTAAGATGAGCTCAACGAGAACAGAAATCTCGTGTGGAAC  
AAAAGGGTAAAAGCTCGTTTGATTCTGATTTCCAGTACGAATACGAACCGTGAAAGCGTGGCCTATC  
GATCCTTTAGACCTTCGGAGTTTGAAGCTAGAGGTGTCAGAAAAGTTACCACAGGGATAACTGGCT  
TGTGGCAGCCAAGCGTTCATAGCGACGTTGCTTTTTGATCCTTCGATGTCGGCTCTTCCTATCATTGT  
GAAGCAGAATCACCAAGTGTGGATTGTTCACCACCAATAGGGAACGTGAGCTGGGTTTAGACC  
GTCGTGAGACAGGTTAGTTTTACCCTACTGATGACCGTGCCGCGATAGTAATTCAACCTAGTACGAG  
AGGAACCGTTGATTCACACAATTGGTCATCGCGCTTGGTTGAAAAGCCAGTGGCGCGAAGCTACCG  
TGTGCCGGATTATGACTGAACGCCTCTAAGTCAGAATCCAAGCTAGCAAGCGGCGCCTGCGCCCGC  
CGCCCGCCCCGACCCACGTTAGGGGCGCAAGCCCCAAGGGCCCGTGCCACCGGCCAAGCCGGCC  
CGGCCGACGCGCCGCGGCCGCGCCTCGAAGCTCCCTTCCCAACGGGCGGCGGGCTGAATCCTTT  
GCAGACGACTTAAATACGCGACGGGGCATTGTAAGTGGCAGAGTGGCCTTGCTGCCACGATCCACT  
GAGATCCAGCCCCGCGTCGCACGGATTTCGTCCCTCCCCCCCCCACACCTCTCCCCGGACCCCGC  
GCAGGTTCTCCGCCCGCCCGAAT

### Supplementary Dataset S3.

The 5S transcription unit sequences of seven *Oryza* species. WGS sequences of these seven accessions were retrieved from GenBank (Table 1) and the 5S sequence was obtained using the dnaLCW method. The header of each FASTA sequence indicates species name and accession number.

>O.rufipogon\_AC11-1008369\_5S

GGATGCGATCATAACCAGCACTAAAGCACCGGATCCCATCAGAACTCCGAAGTTAAGCGTGCTTGGG  
CGAGAGTAGTACTAGGATGGGTGACCTCCTGGGAAGTCCTCGTGTTGCATCCCTCCTTTTTGTCTCT  
CTCTCCCCCCTTTTGACTCGCGCCGCTGCGTCCCTCGTGTTGTGTGCGCCCTTGGGCGAGAGCTGGG  
GAGAATCGGATGTAACATTTTCTGTAGATGTCCGTGGATATATCATTTGCCTGATTCCGAGTCCGTATG  
AGAAAGTTACGCCTATTTTAAGAAATGACACCCGAATGACGCCAAAGCATGTC

>O.rufipogon\_AC01-1002323\_5S

GGATGCGATCATAACCAGCACTAAAGCACCGGATCCCATCAGAACTCCGAAGTTAAGCGTGCTTGGG  
CGAGAGTAGTACTAGGATGGGTGACCTCCTGGGAAGTCCTCGTGTTGCATCCGTCCCTTTTTGACTCG  
CGCCGCTACATCCCTCGTGTGTTGTGTGTCGTCCTTTTTGTCTCTCTCACCTTTTGACCCGCGCCGT  
TACATCTCTCGTGTGATGTGTGTCGTCACGACGAGAGCTGGGAGAATCGGATGTAACATTTT  
CTGTAGATGTCCGTGGATATATTATTTGCCTGATTCCGAGTCCGTATGAGAAAGTTACGCCATTTTAA  
GAAATGACACCCGAATGACGCCTAGGCCGGCACAGGTTTTCGCCGGCCGAACGAGGGAGCGAGGG  
CCGCCGCGGCAGCCCGTTTCAGCAACGGGCGCACGGCTCACGCTCAGCCGCGCGCGGGGCGAGG  
AGCACAAGAGGGGCTGGGGCGCAAGACATGTC

>O.nivara\_IRGC88812\_5S

GGATGCGATCATAACCAGCACTAAAGCACCGGATCCCATCAGAACTCCGAAGTTAAGCGTGCTTGGG  
CGAGAGTAGTACTAGGATGGGTGACCTCCTGGGAAGTCCTCGTGTTGCATCCCTCCTTTTTGACTCT  
CTCTCCCCCCTTTTGACTCGCGCCGCTGCGTCCCCCGTGTTGTGTGCGCCTTTGGGCGAGAGCTGGG  
GAGAATCGGATGTAACATTTTCTGTAGATGTCCGTGGATATATCATTTGCCTGATTCCGAGTCCGTATG  
AGAAAGTTACGCCTATTTTAAGAAATGACACCCGAATGACGCGAAAGCATGTC

>O.barthii\_IRGC101252\_5S

GGATGCGATCATAACCAGCACTAAAGCACCGGATCCCATCAGAACTCCGAAGTTAAGCGTGCTTGGG  
CGAGAGTAGTACTAGGATGGGTGACCTCCTGGGAAGTCCTCGTGTTCCATCCCTCCTTTTTGTCTCT  
TCTCTCCCCCTTTTGACTCGCGCCGCTGCGTCCCTCGTGTTGTCTCGTCCCTTGGGCGAGAGCT  
GCGGAGAATCGGATGTAACATTTTCTGTAGATGTCCGTGGATATATCATTTGCCTGATTCCGAGTCCG  
TATGAGAAAGTTACGCCTATTTTAAGAAATGACATCCGAATGACGCCTAGACATATC

>O.glaberrima\_IRGC103486\_5S

GGATGCGATCATAACCAGCACTAAAGCACCGGATCCCATCAGAACTCCGAAGTTAAGCGTGCTTGGG  
CGAGAGTAGTACTAGGATGGGTGACCTCCTGGGAAGTCCTCGTGTTGCATCCCTCCTTTTTGTCTCT  
TCTCTCCCCCTTTTGACTCGCGCCGCTGCGTCCCTCGTGTTGTGCCGTCCTTGGGCGAGAGCT  
GCGGAGAATCGGATGTAACATTTTCTGTAGATGTCCGTGGATATATCATTTGCCTGATTCCGAGTCCG  
TATGAGAAAGTTACGCCTATTTTAAGAAATGACATCCGAATGACGCCTAGACATATC

>O.glumaepatula\_IRGC88793\_5S

GGATGCGATCATAACCAGCACTAAAGCACCGGATCCCATCAGAACTCCGAAGTTAAGCGTGCTTGGG  
CGAGAGTAGTACTAGGATGGGTGACCTCCTGGGAAGTCCTCGTGTTGCATCCCTCCTTTTTTTTTTCT  
CCCTCTCTCCGCTGCGTCCCTCGTGTTGTGTGTCGTCATGGGCGAGAGCTGGGAGAATCGGATGTA  
AAATTTTCTGTAGATGTCCGTGGATATATCATTTGCCTGATTCCGAGTCCGTATGAGAAAGTTACGCC  
TATTTTAAGAAATGACACCCGAATGACGCCTAGGCCGGCACAGGTTTTCGCCGGCCAAACGAGGGA  
GCGAGGGCCGCACGCGGCAGCCTGTTCCGGCAACGGGCGCACGGCTCACGCTCCGGCCGCGCGCG  
GGGCGAGGAGCACAAAGAGGGGGCGGGGGCGCAAGGCATGTC

>O.meridionalis\_IRGC105298\_5S

GGATGCGATCATAACCAGCACTAAAGCACCGGATCCCATCAGAACTCCGAAGTTAAGCGTGCTTGGG  
CGAGAGTAGTACTAGGATGGGTGACCTCCTGGGAAGTCCTCGTGTTGCATCCGTCCCTTTTTGACTCG  
CGCCGCTACATCCCTCGTGTGTTGTGTGTCGTCCTTTTTGTCTCTCTCACCTTTTGACTCGCGCCGT  
TACATCTCTCGTGTGATGTGTGTCGTCACGACGAGAGCTGGGAGAATCGGATGTAACATTTT  
CTGTAGATGTCCGTGGATATATTATTTGCCTGATTCCGAGTCCGTATGAGAAAGTTACGCCTATTTTAA  
GAAATGACACCCGAATGACGCCTAGGCCGGCACAGGTTTTCGCCGGCCGAACGAGGGAGCGAGGG  
CCGCCGCGGCAGCCCGTTTCAGCAACGGGCGCACGGCTCACGCTCAGCCGCGCGCGGGGCGAGG  
AGCACAAGAGGGGCTGGGGCGCAAGACATGTC
